# Supplementary material for: An Improved Hybrid Feature Selection Algorithm for Electric Charge Recovery Risk
Source: Hindawi journal article supplement (doi:10.1155/2020/8479341), 2020-08-28
Supplement: f1 [file 8479341.f1.zip]

Archive with 58 entries (54 files):
- 8479341.f1/Experimental Results/
- 8479341.f1/Experimental Results/201806/
- 8479341.f1/Experimental Results/201806/BABC_results.csv
- 8479341.f1/Experimental Results/201806/BABC_SBS_results.csv
- 8479341.f1/Experimental Results/201806/BGA_results.csv
- 8479341.f1/Experimental Results/201806/BGA_SBS_results.csv
- 8479341.f1/Experimental Results/201806/BGWO_results.csv
- 8479341.f1/Experimental Results/201806/BGWO_SBS_results.csv
- 8479341.f1/Experimental Results/201806/BPSO_results.csv
- 8479341.f1/Experimental Results/201806/BPSO_SBS_results.csv
- 8479341.f1/Experimental Results/201806/BWOA_results.csv
- 8479341.f1/Experimental Results/201806/BWOA_SBS_results.csv
- 8479341.f1/Experimental Results/201806/CBPSO_results.csv
- 8479341.f1/Experimental Results/201806/CBPSO_SBS_results.csv
- 8479341.f1/Experimental Results/201806/HPSO_SSM_results.csv
- 8479341.f1/Experimental Results/201806/HPSO_SSM_SBS_results.csv
- 8479341.f1/Experimental Results/201806/LBPSOSEE_results.csv
- 8479341.f1/Experimental Results/201806/LBPSOSEE_SBS_results.csv
- 8479341.f1/Experimental Results/201806/NBPSOSEE_results.csv
- 8479341.f1/Experimental Results/201806/NBPSOSEE_SBS_results.csv
- 8479341.f1/Experimental Results/201807/
- 8479341.f1/Experimental Results/201807/BABC_results.csv
- 8479341.f1/Experimental Results/201807/BABC_SBS_results.csv
- 8479341.f1/Experimental Results/201807/BGA_results.csv
- 8479341.f1/Experimental Results/201807/BGA_SBS_results.csv
- 8479341.f1/Experimental Results/201807/BGWO_results.csv
- 8479341.f1/Experimental Results/201807/BGWO_SBS_results.csv
- 8479341.f1/Experimental Results/201807/BPSO_results.csv
- 8479341.f1/Experimental Results/201807/BPSO_SBS_results.csv
- 8479341.f1/Experimental Results/201807/BWOA_results.csv
- 8479341.f1/Experimental Results/201807/BWOA_SBS_results.csv
- 8479341.f1/Experimental Results/201807/CBPSO_results.csv
- 8479341.f1/Experimental Results/201807/CBPSO_SBS_results.csv
- 8479341.f1/Experimental Results/201807/HPSO_SSM_results.csv
- 8479341.f1/Experimental Results/201807/HPSO_SSM_SBS_results.csv
- 8479341.f1/Experimental Results/201807/LBPSOSEE_results.csv
- 8479341.f1/Experimental Results/201807/LBPSOSEE_SBS_results.csv
- 8479341.f1/Experimental Results/201807/NBPSOSEE_results.csv
- 8479341.f1/Experimental Results/201807/NBPSOSEE_SBS_results.csv
- 8479341.f1/Experimental Results/201808/
- 8479341.f1/Experimental Results/201808/BABC_results.csv
- 8479341.f1/Experimental Results/201808/BABC_SBS_results.csv
- 8479341.f1/Experimental Results/201808/BGA_results.csv
- 8479341.f1/Experimental Results/201808/BGA_SBS_results.csv
- 8479341.f1/Experimental Results/201808/BGWO_results.csv
- 8479341.f1/Experimental Results/201808/BGWO_SBS_results.csv
- 8479341.f1/Experimental Results/201808/BPSO_results.csv
- 8479341.f1/Experimental Results/201808/BPSO_SBS_results.csv
- 8479341.f1/Experimental Results/201808/BWOA_results.csv
- 8479341.f1/Experimental Results/201808/BWOA_SBS_results.csv
- 8479341.f1/Experimental Results/201808/CBPSO_results.csv
- 8479341.f1/Experimental Results/201808/CBPSO_SBS_results.csv
- 8479341.f1/Experimental Results/201808/HPSO_SSM_results.csv
- 8479341.f1/Experimental Results/201808/HPSO_SSM_SBS_results.csv
- 8479341.f1/Experimental Results/201808/LBPSOSEE_results.csv
- 8479341.f1/Experimental Results/201808/LBPSOSEE_SBS_results.csv
- 8479341.f1/Experimental Results/201808/NBPSOSEE_results.csv
- 8479341.f1/Experimental Results/201808/NBPSOSEE_SBS_results.csv
