# Supplementary material for: An Improved Hybrid Feature Selection Algorithm for Electric Charge Recovery Risk
Source: Hindawi journal article supplement (doi:10.1155/2020/8479341), 2020-08-28
Supplement: f1 [file 8479341.f1.zip › 8479341.f1/Experimental Results/201806/BABC_results.csv]

features_num	Accuracy_high	Loss_high	Precission_high	Recall_high	F1_high	Accuracy_med	Loss_med	Precission_med	Recall_med	F1_med	Accuracy_low	Loss_low	Precission_low	Recall_low	F1_low
360	1.0	0.0	1.0	1.0	1.0	0.5879017013232514	0.41209829867674863	0.6572890025575447	0.7536656891495601	0.7021857923497269	0.8525852585258525	0.14741474147414746	0.38349514563106796	0.682341650671785	0.49102209944751374
381	1.0	0.0	1.0	1.0	1.0	0.7282051282051282	0.27179487179487183	0.8372881355932204	0.8098360655737705	0.8233333333333334	0.8654187192118227	0.13458128078817733	0.4208715596330275	0.673394495412844	0.5179957657021877
381	1.0	0.0	1.0	1.0	1.0	0.7282051282051282	0.27179487179487183	0.8372881355932204	0.8098360655737705	0.8233333333333334	0.8654187192118227	0.13458128078817733	0.4208715596330275	0.673394495412844	0.5179957657021877
381	1.0	0.0	1.0	1.0	1.0	0.7282051282051282	0.27179487179487183	0.8372881355932204	0.8098360655737705	0.8233333333333334	0.8654187192118227	0.13458128078817733	0.4208715596330275	0.673394495412844	0.5179957657021877
381	1.0	0.0	1.0	1.0	1.0	0.7282051282051282	0.27179487179487183	0.8372881355932204	0.8098360655737705	0.8233333333333334	0.8654187192118227	0.13458128078817733	0.4208715596330275	0.673394495412844	0.5179957657021877
373	1.0	0.0	1.0	1.0	1.0	0.7849829351535836	0.21501706484641636	0.8780141843971632	0.8573407202216067	0.8675543097407149	0.8970679975046787	0.1029320024953213	0.38265971316818775	0.9317460317460318	0.5425138632162663
373	1.0	0.0	1.0	1.0	1.0	0.7849829351535836	0.21501706484641636	0.8780141843971632	0.8573407202216067	0.8675543097407149	0.8970679975046787	0.1029320024953213	0.38265971316818775	0.9317460317460318	0.5425138632162663
373	1.0	0.0	1.0	1.0	1.0	0.7849829351535836	0.21501706484641636	0.8780141843971632	0.8573407202216067	0.8675543097407149	0.8970679975046787	0.1029320024953213	0.38265971316818775	0.9317460317460318	0.5425138632162663
373	1.0	0.0	1.0	1.0	1.0	0.7849829351535836	0.21501706484641636	0.8780141843971632	0.8573407202216067	0.8675543097407149	0.8970679975046787	0.1029320024953213	0.38265971316818775	0.9317460317460318	0.5425138632162663
373	1.0	0.0	1.0	1.0	1.0	0.7849829351535836	0.21501706484641636	0.8780141843971632	0.8573407202216067	0.8675543097407149	0.8970679975046787	0.1029320024953213	0.38265971316818775	0.9317460317460318	0.5425138632162663
373	1.0	0.0	1.0	1.0	1.0	0.7849829351535836	0.21501706484641636	0.8780141843971632	0.8573407202216067	0.8675543097407149	0.8970679975046787	0.1029320024953213	0.38265971316818775	0.9317460317460318	0.5425138632162663
362	1.0	0.0	1.0	1.0	1.0	0.7624521072796935	0.23754789272030652	0.8983451536643026	0.824295010845987	0.8597285067873303	0.891397742032171	0.10860225796782896	0.447265625	0.7427027027027027	0.5583096302316132
376	1.0	0.0	1.0	1.0	1.0	0.7542997542997543	0.24570024570024573	0.8996960486322189	0.8154269972451791	0.8554913294797687	0.9030889173985986	0.09691108260140135	0.5177556818181818	0.7063953488372093	0.5975409836065573
376	1.0	0.0	1.0	1.0	1.0	0.7542997542997543	0.24570024570024573	0.8996960486322189	0.8154269972451791	0.8554913294797687	0.9030889173985986	0.09691108260140135	0.5177556818181818	0.7063953488372093	0.5975409836065573
375	1.0	0.0	1.0	1.0	1.0	0.7494407158836689	0.2505592841163311	0.9025787965616046	0.8015267175572519	0.8490566037735848	0.9080003965500149	0.09199960344998515	0.5245310245310245	0.7299196787148594	0.6104114189756507
377	1.0	0.0	1.0	1.0	1.0	0.7423887587822015	0.25761124121779855	0.9047619047619048	0.7958115183246073	0.8467966573816156	0.9106559810032651	0.08934401899673494	0.5383480825958702	0.7249255213505462	0.6178586542530682
392	1.0	0.0	1.0	1.0	1.0	0.7522123893805309	0.24778761061946908	0.8997214484679665	0.8095238095238095	0.8522427440633246	0.9083515175560405	0.09164848244395951	0.5236389684813754	0.7383838383838384	0.6127409891031014
392	1.0	0.0	1.0	1.0	1.0	0.7522123893805309	0.24778761061946908	0.8997214484679665	0.8095238095238095	0.8522427440633246	0.9083515175560405	0.09164848244395951	0.5236389684813754	0.7383838383838384	0.6127409891031014
396	1.0	0.0	1.0	1.0	1.0	0.7505827505827506	0.2494172494172494	0.9020771513353115	0.8042328042328042	0.8503496503496502	0.9098555313675044	0.09014446863249559	0.537269372693727	0.7193675889328063	0.6151246303337558
393	1.0	0.0	1.0	1.0	1.0	0.7546728971962616	0.24532710280373837	0.907185628742515	0.8037135278514589	0.8523206751054853	0.9104580983476799	0.08954190165232012	0.54	0.71964461994077	0.6170122725349133
393	1.0	0.0	1.0	1.0	1.0	0.7546728971962616	0.24532710280373837	0.907185628742515	0.8037135278514589	0.8523206751054853	0.9104580983476799	0.08954190165232012	0.54	0.71964461994077	0.6170122725349133
393	1.0	0.0	1.0	1.0	1.0	0.7546728971962616	0.24532710280373837	0.907185628742515	0.8037135278514589	0.8523206751054853	0.9104580983476799	0.08954190165232012	0.54	0.71964461994077	0.6170122725349133
393	1.0	0.0	1.0	1.0	1.0	0.7546728971962616	0.24532710280373837	0.907185628742515	0.8037135278514589	0.8523206751054853	0.9104580983476799	0.08954190165232012	0.54	0.71964461994077	0.6170122725349133
393	1.0	0.0	1.0	1.0	1.0	0.7546728971962616	0.24532710280373837	0.907185628742515	0.8037135278514589	0.8523206751054853	0.9104580983476799	0.08954190165232012	0.54	0.71964461994077	0.6170122725349133
399	1.0	0.0	1.0	1.0	1.0	0.7593457943925234	0.24065420560747663	0.9053254437869822	0.8116710875331565	0.855944055944056	0.9104580983476799	0.08954190165232012	0.5399408284023669	0.7206317867719645	0.6173361522198731
399	1.0	0.0	1.0	1.0	1.0	0.7593457943925234	0.24065420560747663	0.9053254437869822	0.8116710875331565	0.855944055944056	0.9104580983476799	0.08954190165232012	0.5399408284023669	0.7206317867719645	0.6173361522198731
399	1.0	0.0	1.0	1.0	1.0	0.7593457943925234	0.24065420560747663	0.9053254437869822	0.8116710875331565	0.855944055944056	0.9104580983476799	0.08954190165232012	0.5399408284023669	0.7206317867719645	0.6173361522198731
391	1.0	0.0	1.0	1.0	1.0	0.7594339622641509	0.24056603773584906	0.9077380952380952	0.8111702127659575	0.8567415730337079	0.9122737612501236	0.0877262387498764	0.5477084898572502	0.7189349112426036	0.6217484008528785
391	1.0	0.0	1.0	1.0	1.0	0.7594339622641509	0.24056603773584906	0.9077380952380952	0.8111702127659575	0.8567415730337079	0.9122737612501236	0.0877262387498764	0.5477084898572502	0.7189349112426036	0.6217484008528785
391	1.0	0.0	1.0	1.0	1.0	0.7594339622641509	0.24056603773584906	0.9077380952380952	0.8111702127659575	0.8567415730337079	0.9122737612501236	0.0877262387498764	0.5477084898572502	0.7189349112426036	0.6217484008528785
391	1.0	0.0	1.0	1.0	1.0	0.7594339622641509	0.24056603773584906	0.9077380952380952	0.8111702127659575	0.8567415730337079	0.9122737612501236	0.0877262387498764	0.5477084898572502	0.7189349112426036	0.6217484008528785
391	1.0	0.0	1.0	1.0	1.0	0.7594339622641509	0.24056603773584906	0.9077380952380952	0.8111702127659575	0.8567415730337079	0.9122737612501236	0.0877262387498764	0.5477084898572502	0.7189349112426036	0.6217484008528785
391	1.0	0.0	1.0	1.0	1.0	0.7594339622641509	0.24056603773584906	0.9077380952380952	0.8111702127659575	0.8567415730337079	0.9122737612501236	0.0877262387498764	0.5477084898572502	0.7189349112426036	0.6217484008528785
391	1.0	0.0	1.0	1.0	1.0	0.7594339622641509	0.24056603773584906	0.9077380952380952	0.8111702127659575	0.8567415730337079	0.9122737612501236	0.0877262387498764	0.5477084898572502	0.7189349112426036	0.6217484008528785
391	1.0	0.0	1.0	1.0	1.0	0.7594339622641509	0.24056603773584906	0.9077380952380952	0.8111702127659575	0.8567415730337079	0.9122737612501236	0.0877262387498764	0.5477084898572502	0.7189349112426036	0.6217484008528785
391	1.0	0.0	1.0	1.0	1.0	0.7594339622641509	0.24056603773584906	0.9077380952380952	0.8111702127659575	0.8567415730337079	0.9122737612501236	0.0877262387498764	0.5477084898572502	0.7189349112426036	0.6217484008528785
395	1.0	0.0	1.0	1.0	1.0	0.7613365155131265	0.23866348448687347	0.9014925373134328	0.8184281842818428	0.8579545454545455	0.9120205614867537	0.0879794385132463	0.5489171023151606	0.7198824681684622	0.6228813559322034
395	1.0	0.0	1.0	1.0	1.0	0.7613365155131265	0.23866348448687347	0.9014925373134328	0.8184281842818428	0.8579545454545455	0.9120205614867537	0.0879794385132463	0.5489171023151606	0.7198824681684622	0.6228813559322034
395	1.0	0.0	1.0	1.0	1.0	0.7613365155131265	0.23866348448687347	0.9014925373134328	0.8184281842818428	0.8579545454545455	0.9120205614867537	0.0879794385132463	0.5489171023151606	0.7198824681684622	0.6228813559322034
395	1.0	0.0	1.0	1.0	1.0	0.7613365155131265	0.23866348448687347	0.9014925373134328	0.8184281842818428	0.8579545454545455	0.9120205614867537	0.0879794385132463	0.5489171023151606	0.7198824681684622	0.6228813559322034
395	1.0	0.0	1.0	1.0	1.0	0.7613365155131265	0.23866348448687347	0.9014925373134328	0.8184281842818428	0.8579545454545455	0.9120205614867537	0.0879794385132463	0.5489171023151606	0.7198824681684622	0.6228813559322034
395	1.0	0.0	1.0	1.0	1.0	0.7613365155131265	0.23866348448687347	0.9014925373134328	0.8184281842818428	0.8579545454545455	0.9120205614867537	0.0879794385132463	0.5489171023151606	0.7198824681684622	0.6228813559322034
395	1.0	0.0	1.0	1.0	1.0	0.7613365155131265	0.23866348448687347	0.9014925373134328	0.8184281842818428	0.8579545454545455	0.9120205614867537	0.0879794385132463	0.5489171023151606	0.7198824681684622	0.6228813559322034
395	1.0	0.0	1.0	1.0	1.0	0.7613365155131265	0.23866348448687347	0.9014925373134328	0.8184281842818428	0.8579545454545455	0.9120205614867537	0.0879794385132463	0.5489171023151606	0.7198824681684622	0.6228813559322034
395	1.0	0.0	1.0	1.0	1.0	0.7613365155131265	0.23866348448687347	0.9014925373134328	0.8184281842818428	0.8579545454545455	0.9120205614867537	0.0879794385132463	0.5489171023151606	0.7198824681684622	0.6228813559322034
395	1.0	0.0	1.0	1.0	1.0	0.7613365155131265	0.23866348448687347	0.9014925373134328	0.8184281842818428	0.8579545454545455	0.9120205614867537	0.0879794385132463	0.5489171023151606	0.7198824681684622	0.6228813559322034
395	1.0	0.0	1.0	1.0	1.0	0.7613365155131265	0.23866348448687347	0.9014925373134328	0.8184281842818428	0.8579545454545455	0.9120205614867537	0.0879794385132463	0.5489171023151606	0.7198824681684622	0.6228813559322034
395	1.0	0.0	1.0	1.0	1.0	0.7613365155131265	0.23866348448687347	0.9014925373134328	0.8184281842818428	0.8579545454545455	0.9120205614867537	0.0879794385132463	0.5489171023151606	0.7198824681684622	0.6228813559322034
395	1.0	0.0	1.0	1.0	1.0	0.7613365155131265	0.23866348448687347	0.9014925373134328	0.8184281842818428	0.8579545454545455	0.9120205614867537	0.0879794385132463	0.5489171023151606	0.7198824681684622	0.6228813559322034
395	1.0	0.0	1.0	1.0	1.0	0.7613365155131265	0.23866348448687347	0.9014925373134328	0.8184281842818428	0.8579545454545455	0.9120205614867537	0.0879794385132463	0.5489171023151606	0.7198824681684622	0.6228813559322034
395	1.0	0.0	1.0	1.0	1.0	0.7613365155131265	0.23866348448687347	0.9014925373134328	0.8184281842818428	0.8579545454545455	0.9120205614867537	0.0879794385132463	0.5489171023151606	0.7198824681684622	0.6228813559322034
395	1.0	0.0	1.0	1.0	1.0	0.7613365155131265	0.23866348448687347	0.9014925373134328	0.8184281842818428	0.8579545454545455	0.9120205614867537	0.0879794385132463	0.5489171023151606	0.7198824681684622	0.6228813559322034
395	1.0	0.0	1.0	1.0	1.0	0.7613365155131265	0.23866348448687347	0.9014925373134328	0.8184281842818428	0.8579545454545455	0.9120205614867537	0.0879794385132463	0.5489171023151606	0.7198824681684622	0.6228813559322034
395	1.0	0.0	1.0	1.0	1.0	0.7613365155131265	0.23866348448687347	0.9014925373134328	0.8184281842818428	0.8579545454545455	0.9120205614867537	0.0879794385132463	0.5489171023151606	0.7198824681684622	0.6228813559322034
395	1.0	0.0	1.0	1.0	1.0	0.7613365155131265	0.23866348448687347	0.9014925373134328	0.8184281842818428	0.8579545454545455	0.9120205614867537	0.0879794385132463	0.5489171023151606	0.7198824681684622	0.6228813559322034
395	1.0	0.0	1.0	1.0	1.0	0.7613365155131265	0.23866348448687347	0.9014925373134328	0.8184281842818428	0.8579545454545455	0.9120205614867537	0.0879794385132463	0.5489171023151606	0.7198824681684622	0.6228813559322034
395	1.0	0.0	1.0	1.0	1.0	0.7613365155131265	0.23866348448687347	0.9014925373134328	0.8184281842818428	0.8579545454545455	0.9120205614867537	0.0879794385132463	0.5489171023151606	0.7198824681684622	0.6228813559322034
395	1.0	0.0	1.0	1.0	1.0	0.7613365155131265	0.23866348448687347	0.9014925373134328	0.8184281842818428	0.8579545454545455	0.9120205614867537	0.0879794385132463	0.5489171023151606	0.7198824681684622	0.6228813559322034
395	1.0	0.0	1.0	1.0	1.0	0.7613365155131265	0.23866348448687347	0.9014925373134328	0.8184281842818428	0.8579545454545455	0.9120205614867537	0.0879794385132463	0.5489171023151606	0.7198824681684622	0.6228813559322034
395	1.0	0.0	1.0	1.0	1.0	0.7613365155131265	0.23866348448687347	0.9014925373134328	0.8184281842818428	0.8579545454545455	0.9120205614867537	0.0879794385132463	0.5489171023151606	0.7198824681684622	0.6228813559322034
395	1.0	0.0	1.0	1.0	1.0	0.7613365155131265	0.23866348448687347	0.9014925373134328	0.8184281842818428	0.8579545454545455	0.9120205614867537	0.0879794385132463	0.5489171023151606	0.7198824681684622	0.6228813559322034
395	1.0	0.0	1.0	1.0	1.0	0.7613365155131265	0.23866348448687347	0.9014925373134328	0.8184281842818428	0.8579545454545455	0.9120205614867537	0.0879794385132463	0.5489171023151606	0.7198824681684622	0.6228813559322034
395	1.0	0.0	1.0	1.0	1.0	0.7613365155131265	0.23866348448687347	0.9014925373134328	0.8184281842818428	0.8579545454545455	0.9120205614867537	0.0879794385132463	0.5489171023151606	0.7198824681684622	0.6228813559322034
395	1.0	0.0	1.0	1.0	1.0	0.7613365155131265	0.23866348448687347	0.9014925373134328	0.8184281842818428	0.8579545454545455	0.9120205614867537	0.0879794385132463	0.5489171023151606	0.7198824681684622	0.6228813559322034
395	1.0	0.0	1.0	1.0	1.0	0.7613365155131265	0.23866348448687347	0.9014925373134328	0.8184281842818428	0.8579545454545455	0.9120205614867537	0.0879794385132463	0.5489171023151606	0.7198824681684622	0.6228813559322034
395	1.0	0.0	1.0	1.0	1.0	0.7613365155131265	0.23866348448687347	0.9014925373134328	0.8184281842818428	0.8579545454545455	0.9120205614867537	0.0879794385132463	0.5489171023151606	0.7198824681684622	0.6228813559322034
395	1.0	0.0	1.0	1.0	1.0	0.7613365155131265	0.23866348448687347	0.9014925373134328	0.8184281842818428	0.8579545454545455	0.9120205614867537	0.0879794385132463	0.5489171023151606	0.7198824681684622	0.6228813559322034
395	1.0	0.0	1.0	1.0	1.0	0.7613365155131265	0.23866348448687347	0.9014925373134328	0.8184281842818428	0.8579545454545455	0.9120205614867537	0.0879794385132463	0.5489171023151606	0.7198824681684622	0.6228813559322034
395	1.0	0.0	1.0	1.0	1.0	0.7613365155131265	0.23866348448687347	0.9014925373134328	0.8184281842818428	0.8579545454545455	0.9120205614867537	0.0879794385132463	0.5489171023151606	0.7198824681684622	0.6228813559322034
395	1.0	0.0	1.0	1.0	1.0	0.7613365155131265	0.23866348448687347	0.9014925373134328	0.8184281842818428	0.8579545454545455	0.9120205614867537	0.0879794385132463	0.5489171023151606	0.7198824681684622	0.6228813559322034
395	1.0	0.0	1.0	1.0	1.0	0.7613365155131265	0.23866348448687347	0.9014925373134328	0.8184281842818428	0.8579545454545455	0.9120205614867537	0.0879794385132463	0.5489171023151606	0.7198824681684622	0.6228813559322034
395	1.0	0.0	1.0	1.0	1.0	0.7613365155131265	0.23866348448687347	0.9014925373134328	0.8184281842818428	0.8579545454545455	0.9120205614867537	0.0879794385132463	0.5489171023151606	0.7198824681684622	0.6228813559322034
395	1.0	0.0	1.0	1.0	1.0	0.7613365155131265	0.23866348448687347	0.9014925373134328	0.8184281842818428	0.8579545454545455	0.9120205614867537	0.0879794385132463	0.5489171023151606	0.7198824681684622	0.6228813559322034
395	1.0	0.0	1.0	1.0	1.0	0.7613365155131265	0.23866348448687347	0.9014925373134328	0.8184281842818428	0.8579545454545455	0.9120205614867537	0.0879794385132463	0.5489171023151606	0.7198824681684622	0.6228813559322034
395	1.0	0.0	1.0	1.0	1.0	0.7613365155131265	0.23866348448687347	0.9014925373134328	0.8184281842818428	0.8579545454545455	0.9120205614867537	0.0879794385132463	0.5489171023151606	0.7198824681684622	0.6228813559322034
395	1.0	0.0	1.0	1.0	1.0	0.7613365155131265	0.23866348448687347	0.9014925373134328	0.8184281842818428	0.8579545454545455	0.9120205614867537	0.0879794385132463	0.5489171023151606	0.7198824681684622	0.6228813559322034
395	1.0	0.0	1.0	1.0	1.0	0.7613365155131265	0.23866348448687347	0.9014925373134328	0.8184281842818428	0.8579545454545455	0.9120205614867537	0.0879794385132463	0.5489171023151606	0.7198824681684622	0.6228813559322034
395	1.0	0.0	1.0	1.0	1.0	0.7613365155131265	0.23866348448687347	0.9014925373134328	0.8184281842818428	0.8579545454545455	0.9120205614867537	0.0879794385132463	0.5489171023151606	0.7198824681684622	0.6228813559322034
395	1.0	0.0	1.0	1.0	1.0	0.7613365155131265	0.23866348448687347	0.9014925373134328	0.8184281842818428	0.8579545454545455	0.9120205614867537	0.0879794385132463	0.5489171023151606	0.7198824681684622	0.6228813559322034
395	1.0	0.0	1.0	1.0	1.0	0.7613365155131265	0.23866348448687347	0.9014925373134328	0.8184281842818428	0.8579545454545455	0.9120205614867537	0.0879794385132463	0.5489171023151606	0.7198824681684622	0.6228813559322034
395	1.0	0.0	1.0	1.0	1.0	0.7613365155131265	0.23866348448687347	0.9014925373134328	0.8184281842818428	0.8579545454545455	0.9120205614867537	0.0879794385132463	0.5489171023151606	0.7198824681684622	0.6228813559322034
395	1.0	0.0	1.0	1.0	1.0	0.7613365155131265	0.23866348448687347	0.9014925373134328	0.8184281842818428	0.8579545454545455	0.9120205614867537	0.0879794385132463	0.5489171023151606	0.7198824681684622	0.6228813559322034
395	1.0	0.0	1.0	1.0	1.0	0.7613365155131265	0.23866348448687347	0.9014925373134328	0.8184281842818428	0.8579545454545455	0.9120205614867537	0.0879794385132463	0.5489171023151606	0.7198824681684622	0.6228813559322034
395	1.0	0.0	1.0	1.0	1.0	0.7613365155131265	0.23866348448687347	0.9014925373134328	0.8184281842818428	0.8579545454545455	0.9120205614867537	0.0879794385132463	0.5489171023151606	0.7198824681684622	0.6228813559322034
395	1.0	0.0	1.0	1.0	1.0	0.7613365155131265	0.23866348448687347	0.9014925373134328	0.8184281842818428	0.8579545454545455	0.9120205614867537	0.0879794385132463	0.5489171023151606	0.7198824681684622	0.6228813559322034
395	1.0	0.0	1.0	1.0	1.0	0.7613365155131265	0.23866348448687347	0.9014925373134328	0.8184281842818428	0.8579545454545455	0.9120205614867537	0.0879794385132463	0.5489171023151606	0.7198824681684622	0.6228813559322034
395	1.0	0.0	1.0	1.0	1.0	0.7613365155131265	0.23866348448687347	0.9014925373134328	0.8184281842818428	0.8579545454545455	0.9120205614867537	0.0879794385132463	0.5489171023151606	0.7198824681684622	0.6228813559322034
395	1.0	0.0	1.0	1.0	1.0	0.7613365155131265	0.23866348448687347	0.9014925373134328	0.8184281842818428	0.8579545454545455	0.9120205614867537	0.0879794385132463	0.5489171023151606	0.7198824681684622	0.6228813559322034
395	1.0	0.0	1.0	1.0	1.0	0.7613365155131265	0.23866348448687347	0.9014925373134328	0.8184281842818428	0.8579545454545455	0.9120205614867537	0.0879794385132463	0.5489171023151606	0.7198824681684622	0.6228813559322034
395	1.0	0.0	1.0	1.0	1.0	0.7613365155131265	0.23866348448687347	0.9014925373134328	0.8184281842818428	0.8579545454545455	0.9120205614867537	0.0879794385132463	0.5489171023151606	0.7198824681684622	0.6228813559322034
395	1.0	0.0	1.0	1.0	1.0	0.7613365155131265	0.23866348448687347	0.9014925373134328	0.8184281842818428	0.8579545454545455	0.9120205614867537	0.0879794385132463	0.5489171023151606	0.7198824681684622	0.6228813559322034
395	1.0	0.0	1.0	1.0	1.0	0.7613365155131265	0.23866348448687347	0.9014925373134328	0.8184281842818428	0.8579545454545455	0.9120205614867537	0.0879794385132463	0.5489171023151606	0.7198824681684622	0.6228813559322034
395	1.0	0.0	1.0	1.0	1.0	0.7613365155131265	0.23866348448687347	0.9014925373134328	0.8184281842818428	0.8579545454545455	0.9120205614867537	0.0879794385132463	0.5489171023151606	0.7198824681684622	0.6228813559322034
395	1.0	0.0	1.0	1.0	1.0	0.7613365155131265	0.23866348448687347	0.9014925373134328	0.8184281842818428	0.8579545454545455	0.9120205614867537	0.0879794385132463	0.5489171023151606	0.7198824681684622	0.6228813559322034
395	1.0	0.0	1.0	1.0	1.0	0.7613365155131265	0.23866348448687347	0.9014925373134328	0.8184281842818428	0.8579545454545455	0.9120205614867537	0.0879794385132463	0.5489171023151606	0.7198824681684622	0.6228813559322034
395	1.0	0.0	1.0	1.0	1.0	0.7613365155131265	0.23866348448687347	0.9014925373134328	0.8184281842818428	0.8579545454545455	0.9120205614867537	0.0879794385132463	0.5489171023151606	0.7198824681684622	0.6228813559322034
395	1.0	0.0	1.0	1.0	1.0	0.7613365155131265	0.23866348448687347	0.9014925373134328	0.8184281842818428	0.8579545454545455	0.9120205614867537	0.0879794385132463	0.5489171023151606	0.7198824681684622	0.6228813559322034
395	1.0	0.0	1.0	1.0	1.0	0.7613365155131265	0.23866348448687347	0.9014925373134328	0.8184281842818428	0.8579545454545455	0.9120205614867537	0.0879794385132463	0.5489171023151606	0.7198824681684622	0.6228813559322034
395	1.0	0.0	1.0	1.0	1.0	0.7613365155131265	0.23866348448687347	0.9014925373134328	0.8184281842818428	0.8579545454545455	0.9120205614867537	0.0879794385132463	0.5489171023151606	0.7198824681684622	0.6228813559322034
395	1.0	0.0	1.0	1.0	1.0	0.7613365155131265	0.23866348448687347	0.9014925373134328	0.8184281842818428	0.8579545454545455	0.9120205614867537	0.0879794385132463	0.5489171023151606	0.7198824681684622	0.6228813559322034
