# Supplementary material for: An Improved Hybrid Feature Selection Algorithm for Electric Charge Recovery Risk
Source: Hindawi journal article supplement (doi:10.1155/2020/8479341), 2020-08-28
Supplement: f1 [file 8479341.f1.zip › 8479341.f1/Experimental Results/201806/BABC_SBS_results.csv]

features_num	Accuracy_high	Loss_high	Precission_high	Recall_high	F1_high	Accuracy_med	Loss_med	Precission_med	Recall_med	F1_med	Accuracy_low	Loss_low	Precission_low	Recall_low	F1_low
395	1	0	1	1	1	0.759615385	0.240384615	0.900900901	0.817438692	0.857142857	0.912441941	0.087558059	0.551234106	0.720430108	0.624576271
395	1	0	1	1	1	0.759615385	0.240384615	0.900900901	0.817438692	0.857142857	0.912441941	0.087558059	0.551234106	0.720430108	0.624576271
395	1	0	1	1	1	0.759615385	0.240384615	0.900900901	0.817438692	0.857142857	0.912441941	0.087558059	0.551234106	0.720430108	0.624576271
395	1	0	1	1	1	0.759615385	0.240384615	0.900900901	0.817438692	0.857142857	0.912441941	0.087558059	0.551234106	0.720430108	0.624576271
395	1	0	1	1	1	0.759615385	0.240384615	0.900900901	0.817438692	0.857142857	0.912441941	0.087558059	0.551234106	0.720430108	0.624576271
395	1	0	1	1	1	0.759615385	0.240384615	0.900900901	0.817438692	0.857142857	0.912441941	0.087558059	0.551234106	0.720430108	0.624576271
395	1	0	1	1	1	0.759615385	0.240384615	0.900900901	0.817438692	0.857142857	0.912441941	0.087558059	0.551234106	0.720430108	0.624576271
395	1	0	1	1	1	0.759615385	0.240384615	0.900900901	0.817438692	0.857142857	0.912441941	0.087558059	0.551234106	0.720430108	0.624576271
395	1	0	1	1	1	0.759615385	0.240384615	0.900900901	0.817438692	0.857142857	0.912441941	0.087558059	0.551234106	0.720430108	0.624576271
395	1	0	1	1	1	0.759615385	0.240384615	0.900900901	0.817438692	0.857142857	0.912441941	0.087558059	0.551234106	0.720430108	0.624576271
395	1	0	1	1	1	0.759615385	0.240384615	0.900900901	0.817438692	0.857142857	0.912441941	0.087558059	0.551234106	0.720430108	0.624576271
394	1	0	1	1	1	0.76076555	0.23923445	0.904191617	0.816216216	0.857954545	0.912721162	0.087278838	0.551310861	0.721568627	0.625053079
394	1	0	1	1	1	0.76076555	0.23923445	0.904191617	0.816216216	0.857954545	0.912721162	0.087278838	0.551310861	0.721568627	0.625053079
394	1	0	1	1	1	0.76076555	0.23923445	0.904191617	0.816216216	0.857954545	0.912721162	0.087278838	0.551310861	0.721568627	0.625053079
394	1	0	1	1	1	0.76076555	0.23923445	0.904191617	0.816216216	0.857954545	0.912721162	0.087278838	0.551310861	0.721568627	0.625053079
394	1	0	1	1	1	0.76076555	0.23923445	0.904191617	0.816216216	0.857954545	0.912721162	0.087278838	0.551310861	0.721568627	0.625053079
394	1	0	1	1	1	0.76076555	0.23923445	0.904191617	0.816216216	0.857954545	0.912721162	0.087278838	0.551310861	0.721568627	0.625053079
394	1	0	1	1	1	0.76076555	0.23923445	0.904191617	0.816216216	0.857954545	0.912721162	0.087278838	0.551310861	0.721568627	0.625053079
394	1	0	1	1	1	0.76076555	0.23923445	0.904191617	0.816216216	0.857954545	0.912721162	0.087278838	0.551310861	0.721568627	0.625053079
394	1	0	1	1	1	0.76076555	0.23923445	0.904191617	0.816216216	0.857954545	0.912721162	0.087278838	0.551310861	0.721568627	0.625053079
394	1	0	1	1	1	0.76076555	0.23923445	0.904191617	0.816216216	0.857954545	0.912721162	0.087278838	0.551310861	0.721568627	0.625053079
394	1	0	1	1	1	0.76076555	0.23923445	0.904191617	0.816216216	0.857954545	0.912721162	0.087278838	0.551310861	0.721568627	0.625053079
394	1	0	1	1	1	0.76076555	0.23923445	0.904191617	0.816216216	0.857954545	0.912721162	0.087278838	0.551310861	0.721568627	0.625053079
394	1	0	1	1	1	0.76076555	0.23923445	0.904191617	0.816216216	0.857954545	0.912721162	0.087278838	0.551310861	0.721568627	0.625053079
394	1	0	1	1	1	0.76076555	0.23923445	0.904191617	0.816216216	0.857954545	0.912721162	0.087278838	0.551310861	0.721568627	0.625053079
394	1	0	1	1	1	0.76076555	0.23923445	0.904191617	0.816216216	0.857954545	0.912721162	0.087278838	0.551310861	0.721568627	0.625053079
394	1	0	1	1	1	0.76076555	0.23923445	0.904191617	0.816216216	0.857954545	0.912721162	0.087278838	0.551310861	0.721568627	0.625053079
394	1	0	1	1	1	0.76076555	0.23923445	0.904191617	0.816216216	0.857954545	0.912721162	0.087278838	0.551310861	0.721568627	0.625053079
394	1	0	1	1	1	0.76076555	0.23923445	0.904191617	0.816216216	0.857954545	0.912721162	0.087278838	0.551310861	0.721568627	0.625053079
394	1	0	1	1	1	0.76076555	0.23923445	0.904191617	0.816216216	0.857954545	0.912721162	0.087278838	0.551310861	0.721568627	0.625053079
394	1	0	1	1	1	0.76076555	0.23923445	0.904191617	0.816216216	0.857954545	0.912721162	0.087278838	0.551310861	0.721568627	0.625053079
393	1	0	1	1	1	0.762019231	0.237980769	0.903903904	0.817934783	0.858773181	0.912540765	0.087459235	0.551310861	0.720156556	0.624522698
393	1	0	1	1	1	0.762019231	0.237980769	0.903903904	0.817934783	0.858773181	0.912540765	0.087459235	0.551310861	0.720156556	0.624522698
393	1	0	1	1	1	0.762019231	0.237980769	0.903903904	0.817934783	0.858773181	0.912540765	0.087459235	0.551310861	0.720156556	0.624522698
393	1	0	1	1	1	0.762019231	0.237980769	0.903903904	0.817934783	0.858773181	0.912540765	0.087459235	0.551310861	0.720156556	0.624522698
393	1	0	1	1	1	0.762019231	0.237980769	0.903903904	0.817934783	0.858773181	0.912540765	0.087459235	0.551310861	0.720156556	0.624522698
393	1	0	1	1	1	0.762019231	0.237980769	0.903903904	0.817934783	0.858773181	0.912540765	0.087459235	0.551310861	0.720156556	0.624522698
393	1	0	1	1	1	0.762019231	0.237980769	0.903903904	0.817934783	0.858773181	0.912540765	0.087459235	0.551310861	0.720156556	0.624522698
393	1	0	1	1	1	0.762019231	0.237980769	0.903903904	0.817934783	0.858773181	0.912540765	0.087459235	0.551310861	0.720156556	0.624522698
393	1	0	1	1	1	0.762019231	0.237980769	0.903903904	0.817934783	0.858773181	0.912540765	0.087459235	0.551310861	0.720156556	0.624522698
393	1	0	1	1	1	0.762019231	0.237980769	0.903903904	0.817934783	0.858773181	0.912540765	0.087459235	0.551310861	0.720156556	0.624522698
393	1	0	1	1	1	0.762019231	0.237980769	0.903903904	0.817934783	0.858773181	0.912540765	0.087459235	0.551310861	0.720156556	0.624522698
393	1	0	1	1	1	0.762019231	0.237980769	0.903903904	0.817934783	0.858773181	0.912540765	0.087459235	0.551310861	0.720156556	0.624522698
392	1	0	1	1	1	0.758024691	0.241975309	0.906832298	0.811111111	0.856304985	0.913936044	0.086063956	0.561255743	0.710271318	0.627031651
392	1	0	1	1	1	0.758024691	0.241975309	0.906832298	0.811111111	0.856304985	0.913936044	0.086063956	0.561255743	0.710271318	0.627031651
392	1	0	1	1	1	0.758024691	0.241975309	0.906832298	0.811111111	0.856304985	0.913936044	0.086063956	0.561255743	0.710271318	0.627031651
392	1	0	1	1	1	0.758024691	0.241975309	0.906832298	0.811111111	0.856304985	0.913936044	0.086063956	0.561255743	0.710271318	0.627031651
392	1	0	1	1	1	0.758024691	0.241975309	0.906832298	0.811111111	0.856304985	0.913936044	0.086063956	0.561255743	0.710271318	0.627031651
391	1	0	1	1	1	0.76076555	0.23923445	0.904477612	0.81671159	0.858356941	0.913133709	0.086866291	0.553303303	0.721841332	0.626434339
391	1	0	1	1	1	0.76076555	0.23923445	0.904477612	0.81671159	0.858356941	0.913133709	0.086866291	0.553303303	0.721841332	0.626434339
391	1	0	1	1	1	0.76076555	0.23923445	0.904477612	0.81671159	0.858356941	0.913133709	0.086866291	0.553303303	0.721841332	0.626434339
391	1	0	1	1	1	0.76076555	0.23923445	0.904477612	0.81671159	0.858356941	0.913133709	0.086866291	0.553303303	0.721841332	0.626434339
391	1	0	1	1	1	0.76076555	0.23923445	0.904477612	0.81671159	0.858356941	0.913133709	0.086866291	0.553303303	0.721841332	0.626434339
391	1	0	1	1	1	0.76076555	0.23923445	0.904477612	0.81671159	0.858356941	0.913133709	0.086866291	0.553303303	0.721841332	0.626434339
391	1	0	1	1	1	0.76076555	0.23923445	0.904477612	0.81671159	0.858356941	0.913133709	0.086866291	0.553303303	0.721841332	0.626434339
391	1	0	1	1	1	0.76076555	0.23923445	0.904477612	0.81671159	0.858356941	0.913133709	0.086866291	0.553303303	0.721841332	0.626434339
391	1	0	1	1	1	0.76076555	0.23923445	0.904477612	0.81671159	0.858356941	0.913133709	0.086866291	0.553303303	0.721841332	0.626434339
391	1	0	1	1	1	0.76076555	0.23923445	0.904477612	0.81671159	0.858356941	0.913133709	0.086866291	0.553303303	0.721841332	0.626434339
391	1	0	1	1	1	0.76076555	0.23923445	0.904477612	0.81671159	0.858356941	0.913133709	0.086866291	0.553303303	0.721841332	0.626434339
391	1	0	1	1	1	0.76076555	0.23923445	0.904477612	0.81671159	0.858356941	0.913133709	0.086866291	0.553303303	0.721841332	0.626434339
391	1	0	1	1	1	0.76076555	0.23923445	0.904477612	0.81671159	0.858356941	0.913133709	0.086866291	0.553303303	0.721841332	0.626434339
391	1	0	1	1	1	0.76076555	0.23923445	0.904477612	0.81671159	0.858356941	0.913133709	0.086866291	0.553303303	0.721841332	0.626434339
391	1	0	1	1	1	0.76076555	0.23923445	0.904477612	0.81671159	0.858356941	0.913133709	0.086866291	0.553303303	0.721841332	0.626434339
391	1	0	1	1	1	0.76076555	0.23923445	0.904477612	0.81671159	0.858356941	0.913133709	0.086866291	0.553303303	0.721841332	0.626434339
391	1	0	1	1	1	0.76076555	0.23923445	0.904477612	0.81671159	0.858356941	0.913133709	0.086866291	0.553303303	0.721841332	0.626434339
391	1	0	1	1	1	0.76076555	0.23923445	0.904477612	0.81671159	0.858356941	0.913133709	0.086866291	0.553303303	0.721841332	0.626434339
391	1	0	1	1	1	0.76076555	0.23923445	0.904477612	0.81671159	0.858356941	0.913133709	0.086866291	0.553303303	0.721841332	0.626434339
391	1	0	1	1	1	0.76076555	0.23923445	0.904477612	0.81671159	0.858356941	0.913133709	0.086866291	0.553303303	0.721841332	0.626434339
391	1	0	1	1	1	0.76076555	0.23923445	0.904477612	0.81671159	0.858356941	0.913133709	0.086866291	0.553303303	0.721841332	0.626434339
391	1	0	1	1	1	0.76076555	0.23923445	0.904477612	0.81671159	0.858356941	0.913133709	0.086866291	0.553303303	0.721841332	0.626434339
391	1	0	1	1	1	0.76076555	0.23923445	0.904477612	0.81671159	0.858356941	0.913133709	0.086866291	0.553303303	0.721841332	0.626434339
391	1	0	1	1	1	0.76076555	0.23923445	0.904477612	0.81671159	0.858356941	0.913133709	0.086866291	0.553303303	0.721841332	0.626434339
391	1	0	1	1	1	0.76076555	0.23923445	0.904477612	0.81671159	0.858356941	0.913133709	0.086866291	0.553303303	0.721841332	0.626434339
391	1	0	1	1	1	0.76076555	0.23923445	0.904477612	0.81671159	0.858356941	0.913133709	0.086866291	0.553303303	0.721841332	0.626434339
391	1	0	1	1	1	0.76076555	0.23923445	0.904477612	0.81671159	0.858356941	0.913133709	0.086866291	0.553303303	0.721841332	0.626434339
391	1	0	1	1	1	0.76076555	0.23923445	0.904477612	0.81671159	0.858356941	0.913133709	0.086866291	0.553303303	0.721841332	0.626434339
391	1	0	1	1	1	0.76076555	0.23923445	0.904477612	0.81671159	0.858356941	0.913133709	0.086866291	0.553303303	0.721841332	0.626434339
391	1	0	1	1	1	0.76076555	0.23923445	0.904477612	0.81671159	0.858356941	0.913133709	0.086866291	0.553303303	0.721841332	0.626434339
391	1	0	1	1	1	0.76076555	0.23923445	0.904477612	0.81671159	0.858356941	0.913133709	0.086866291	0.553303303	0.721841332	0.626434339
391	1	0	1	1	1	0.76076555	0.23923445	0.904477612	0.81671159	0.858356941	0.913133709	0.086866291	0.553303303	0.721841332	0.626434339
391	1	0	1	1	1	0.76076555	0.23923445	0.904477612	0.81671159	0.858356941	0.913133709	0.086866291	0.553303303	0.721841332	0.626434339
390	1	0	1	1	1	0.763546798	0.236453202	0.907407407	0.816666667	0.859649123	0.913236601	0.086763399	0.557998484	0.713178295	0.626116546
390	1	0	1	1	1	0.763546798	0.236453202	0.907407407	0.816666667	0.859649123	0.913236601	0.086763399	0.557998484	0.713178295	0.626116546
390	1	0	1	1	1	0.763546798	0.236453202	0.907407407	0.816666667	0.859649123	0.913236601	0.086763399	0.557998484	0.713178295	0.626116546
390	1	0	1	1	1	0.763546798	0.236453202	0.907407407	0.816666667	0.859649123	0.913236601	0.086763399	0.557998484	0.713178295	0.626116546
390	1	0	1	1	1	0.763546798	0.236453202	0.907407407	0.816666667	0.859649123	0.913236601	0.086763399	0.557998484	0.713178295	0.626116546
390	1	0	1	1	1	0.763546798	0.236453202	0.907407407	0.816666667	0.859649123	0.913236601	0.086763399	0.557998484	0.713178295	0.626116546
390	1	0	1	1	1	0.763546798	0.236453202	0.907407407	0.816666667	0.859649123	0.913236601	0.086763399	0.557998484	0.713178295	0.626116546
390	1	0	1	1	1	0.763546798	0.236453202	0.907407407	0.816666667	0.859649123	0.913236601	0.086763399	0.557998484	0.713178295	0.626116546
390	1	0	1	1	1	0.763546798	0.236453202	0.907407407	0.816666667	0.859649123	0.913236601	0.086763399	0.557998484	0.713178295	0.626116546
390	1	0	1	1	1	0.763546798	0.236453202	0.907407407	0.816666667	0.859649123	0.913236601	0.086763399	0.557998484	0.713178295	0.626116546
390	1	0	1	1	1	0.763546798	0.236453202	0.907407407	0.816666667	0.859649123	0.913236601	0.086763399	0.557998484	0.713178295	0.626116546
390	1	0	1	1	1	0.763546798	0.236453202	0.907407407	0.816666667	0.859649123	0.913236601	0.086763399	0.557998484	0.713178295	0.626116546
390	1	0	1	1	1	0.763546798	0.236453202	0.907407407	0.816666667	0.859649123	0.913236601	0.086763399	0.557998484	0.713178295	0.626116546
390	1	0	1	1	1	0.763546798	0.236453202	0.907407407	0.816666667	0.859649123	0.913236601	0.086763399	0.557998484	0.713178295	0.626116546
390	1	0	1	1	1	0.763546798	0.236453202	0.907407407	0.816666667	0.859649123	0.913236601	0.086763399	0.557998484	0.713178295	0.626116546
390	1	0	1	1	1	0.763546798	0.236453202	0.907407407	0.816666667	0.859649123	0.913236601	0.086763399	0.557998484	0.713178295	0.626116546
390	1	0	1	1	1	0.763546798	0.236453202	0.907407407	0.816666667	0.859649123	0.913236601	0.086763399	0.557998484	0.713178295	0.626116546
390	1	0	1	1	1	0.763546798	0.236453202	0.907407407	0.816666667	0.859649123	0.913236601	0.086763399	0.557998484	0.713178295	0.626116546
390	1	0	1	1	1	0.763546798	0.236453202	0.907407407	0.816666667	0.859649123	0.913236601	0.086763399	0.557998484	0.713178295	0.626116546
390	1	0	1	1	1	0.763546798	0.236453202	0.907407407	0.816666667	0.859649123	0.913236601	0.086763399	0.557998484	0.713178295	0.626116546
390	1	0	1	1	1	0.763546798	0.236453202	0.907407407	0.816666667	0.859649123	0.913236601	0.086763399	0.557998484	0.713178295	0.626116546
390	1	0	1	1	1	0.763546798	0.236453202	0.907407407	0.816666667	0.859649123	0.913236601	0.086763399	0.557998484	0.713178295	0.626116546
390	1	0	1	1	1	0.763546798	0.236453202	0.907407407	0.816666667	0.859649123	0.913236601	0.086763399	0.557998484	0.713178295	0.626116546
390	1	0	1	1	1	0.763546798	0.236453202	0.907407407	0.816666667	0.859649123	0.913236601	0.086763399	0.557998484	0.713178295	0.626116546
390	1	0	1	1	1	0.763546798	0.236453202	0.907407407	0.816666667	0.859649123	0.913236601	0.086763399	0.557998484	0.713178295	0.626116546
390	1	0	1	1	1	0.763546798	0.236453202	0.907407407	0.816666667	0.859649123	0.913236601	0.086763399	0.557998484	0.713178295	0.626116546
390	1	0	1	1	1	0.763546798	0.236453202	0.907407407	0.816666667	0.859649123	0.913236601	0.086763399	0.557998484	0.713178295	0.626116546
390	1	0	1	1	1	0.763546798	0.236453202	0.907407407	0.816666667	0.859649123	0.913236601	0.086763399	0.557998484	0.713178295	0.626116546
390	1	0	1	1	1	0.763546798	0.236453202	0.907407407	0.816666667	0.859649123	0.913236601	0.086763399	0.557998484	0.713178295	0.626116546
390	1	0	1	1	1	0.763546798	0.236453202	0.907407407	0.816666667	0.859649123	0.913236601	0.086763399	0.557998484	0.713178295	0.626116546
390	1	0	1	1	1	0.763546798	0.236453202	0.907407407	0.816666667	0.859649123	0.913236601	0.086763399	0.557998484	0.713178295	0.626116546
390	1	0	1	1	1	0.763546798	0.236453202	0.907407407	0.816666667	0.859649123	0.913236601	0.086763399	0.557998484	0.713178295	0.626116546
390	1	0	1	1	1	0.763546798	0.236453202	0.907407407	0.816666667	0.859649123	0.913236601	0.086763399	0.557998484	0.713178295	0.626116546
390	1	0	1	1	1	0.763546798	0.236453202	0.907407407	0.816666667	0.859649123	0.913236601	0.086763399	0.557998484	0.713178295	0.626116546
390	1	0	1	1	1	0.763546798	0.236453202	0.907407407	0.816666667	0.859649123	0.913236601	0.086763399	0.557998484	0.713178295	0.626116546
390	1	0	1	1	1	0.763546798	0.236453202	0.907407407	0.816666667	0.859649123	0.913236601	0.086763399	0.557998484	0.713178295	0.626116546
390	1	0	1	1	1	0.763546798	0.236453202	0.907407407	0.816666667	0.859649123	0.913236601	0.086763399	0.557998484	0.713178295	0.626116546
390	1	0	1	1	1	0.763546798	0.236453202	0.907407407	0.816666667	0.859649123	0.913236601	0.086763399	0.557998484	0.713178295	0.626116546
390	1	0	1	1	1	0.763546798	0.236453202	0.907407407	0.816666667	0.859649123	0.913236601	0.086763399	0.557998484	0.713178295	0.626116546
390	1	0	1	1	1	0.763546798	0.236453202	0.907407407	0.816666667	0.859649123	0.913236601	0.086763399	0.557998484	0.713178295	0.626116546
390	1	0	1	1	1	0.763546798	0.236453202	0.907407407	0.816666667	0.859649123	0.913236601	0.086763399	0.557998484	0.713178295	0.626116546
390	1	0	1	1	1	0.763546798	0.236453202	0.907407407	0.816666667	0.859649123	0.913236601	0.086763399	0.557998484	0.713178295	0.626116546
390	1	0	1	1	1	0.763546798	0.236453202	0.907407407	0.816666667	0.859649123	0.913236601	0.086763399	0.557998484	0.713178295	0.626116546
390	1	0	1	1	1	0.763546798	0.236453202	0.907407407	0.816666667	0.859649123	0.913236601	0.086763399	0.557998484	0.713178295	0.626116546
390	1	0	1	1	1	0.763546798	0.236453202	0.907407407	0.816666667	0.859649123	0.913236601	0.086763399	0.557998484	0.713178295	0.626116546
390	1	0	1	1	1	0.763546798	0.236453202	0.907407407	0.816666667	0.859649123	0.913236601	0.086763399	0.557998484	0.713178295	0.626116546
390	1	0	1	1	1	0.763546798	0.236453202	0.907407407	0.816666667	0.859649123	0.913236601	0.086763399	0.557998484	0.713178295	0.626116546
390	1	0	1	1	1	0.763546798	0.236453202	0.907407407	0.816666667	0.859649123	0.913236601	0.086763399	0.557998484	0.713178295	0.626116546
390	1	0	1	1	1	0.763546798	0.236453202	0.907407407	0.816666667	0.859649123	0.913236601	0.086763399	0.557998484	0.713178295	0.626116546
390	1	0	1	1	1	0.763546798	0.236453202	0.907407407	0.816666667	0.859649123	0.913236601	0.086763399	0.557998484	0.713178295	0.626116546
390	1	0	1	1	1	0.763546798	0.236453202	0.907407407	0.816666667	0.859649123	0.913236601	0.086763399	0.557998484	0.713178295	0.626116546
390	1	0	1	1	1	0.763546798	0.236453202	0.907407407	0.816666667	0.859649123	0.913236601	0.086763399	0.557998484	0.713178295	0.626116546
390	1	0	1	1	1	0.763546798	0.236453202	0.907407407	0.816666667	0.859649123	0.913236601	0.086763399	0.557998484	0.713178295	0.626116546
390	1	0	1	1	1	0.763546798	0.236453202	0.907407407	0.816666667	0.859649123	0.913236601	0.086763399	0.557998484	0.713178295	0.626116546
390	1	0	1	1	1	0.763546798	0.236453202	0.907407407	0.816666667	0.859649123	0.913236601	0.086763399	0.557998484	0.713178295	0.626116546
390	1	0	1	1	1	0.763546798	0.236453202	0.907407407	0.816666667	0.859649123	0.913236601	0.086763399	0.557998484	0.713178295	0.626116546
390	1	0	1	1	1	0.763546798	0.236453202	0.907407407	0.816666667	0.859649123	0.913236601	0.086763399	0.557998484	0.713178295	0.626116546
390	1	0	1	1	1	0.763546798	0.236453202	0.907407407	0.816666667	0.859649123	0.913236601	0.086763399	0.557998484	0.713178295	0.626116546
390	1	0	1	1	1	0.763546798	0.236453202	0.907407407	0.816666667	0.859649123	0.913236601	0.086763399	0.557998484	0.713178295	0.626116546
390	1	0	1	1	1	0.763546798	0.236453202	0.907407407	0.816666667	0.859649123	0.913236601	0.086763399	0.557998484	0.713178295	0.626116546
390	1	0	1	1	1	0.763546798	0.236453202	0.907407407	0.816666667	0.859649123	0.913236601	0.086763399	0.557998484	0.713178295	0.626116546
390	1	0	1	1	1	0.763546798	0.236453202	0.907407407	0.816666667	0.859649123	0.913236601	0.086763399	0.557998484	0.713178295	0.626116546
390	1	0	1	1	1	0.763546798	0.236453202	0.907407407	0.816666667	0.859649123	0.913236601	0.086763399	0.557998484	0.713178295	0.626116546
390	1	0	1	1	1	0.763546798	0.236453202	0.907407407	0.816666667	0.859649123	0.913236601	0.086763399	0.557998484	0.713178295	0.626116546
390	1	0	1	1	1	0.763546798	0.236453202	0.907407407	0.816666667	0.859649123	0.913236601	0.086763399	0.557998484	0.713178295	0.626116546
390	1	0	1	1	1	0.763546798	0.236453202	0.907407407	0.816666667	0.859649123	0.913236601	0.086763399	0.557998484	0.713178295	0.626116546
390	1	0	1	1	1	0.763546798	0.236453202	0.907407407	0.816666667	0.859649123	0.913236601	0.086763399	0.557998484	0.713178295	0.626116546
390	1	0	1	1	1	0.763546798	0.236453202	0.907407407	0.816666667	0.859649123	0.913236601	0.086763399	0.557998484	0.713178295	0.626116546
390	1	0	1	1	1	0.763546798	0.236453202	0.907407407	0.816666667	0.859649123	0.913236601	0.086763399	0.557998484	0.713178295	0.626116546
390	1	0	1	1	1	0.763546798	0.236453202	0.907407407	0.816666667	0.859649123	0.913236601	0.086763399	0.557998484	0.713178295	0.626116546
390	1	0	1	1	1	0.763546798	0.236453202	0.907407407	0.816666667	0.859649123	0.913236601	0.086763399	0.557998484	0.713178295	0.626116546
390	1	0	1	1	1	0.763546798	0.236453202	0.907407407	0.816666667	0.859649123	0.913236601	0.086763399	0.557998484	0.713178295	0.626116546
390	1	0	1	1	1	0.763546798	0.236453202	0.907407407	0.816666667	0.859649123	0.913236601	0.086763399	0.557998484	0.713178295	0.626116546
390	1	0	1	1	1	0.763546798	0.236453202	0.907407407	0.816666667	0.859649123	0.913236601	0.086763399	0.557998484	0.713178295	0.626116546
390	1	0	1	1	1	0.763546798	0.236453202	0.907407407	0.816666667	0.859649123	0.913236601	0.086763399	0.557998484	0.713178295	0.626116546
390	1	0	1	1	1	0.763546798	0.236453202	0.907407407	0.816666667	0.859649123	0.913236601	0.086763399	0.557998484	0.713178295	0.626116546
390	1	0	1	1	1	0.763546798	0.236453202	0.907407407	0.816666667	0.859649123	0.913236601	0.086763399	0.557998484	0.713178295	0.626116546
390	1	0	1	1	1	0.763546798	0.236453202	0.907407407	0.816666667	0.859649123	0.913236601	0.086763399	0.557998484	0.713178295	0.626116546
390	1	0	1	1	1	0.763546798	0.236453202	0.907407407	0.816666667	0.859649123	0.913236601	0.086763399	0.557998484	0.713178295	0.626116546
390	1	0	1	1	1	0.763546798	0.236453202	0.907407407	0.816666667	0.859649123	0.913236601	0.086763399	0.557998484	0.713178295	0.626116546
390	1	0	1	1	1	0.763546798	0.236453202	0.907407407	0.816666667	0.859649123	0.913236601	0.086763399	0.557998484	0.713178295	0.626116546
390	1	0	1	1	1	0.763546798	0.236453202	0.907407407	0.816666667	0.859649123	0.913236601	0.086763399	0.557998484	0.713178295	0.626116546
390	1	0	1	1	1	0.763546798	0.236453202	0.907407407	0.816666667	0.859649123	0.913236601	0.086763399	0.557998484	0.713178295	0.626116546
390	1	0	1	1	1	0.763546798	0.236453202	0.907407407	0.816666667	0.859649123	0.913236601	0.086763399	0.557998484	0.713178295	0.626116546
390	1	0	1	1	1	0.763546798	0.236453202	0.907407407	0.816666667	0.859649123	0.913236601	0.086763399	0.557998484	0.713178295	0.626116546
390	1	0	1	1	1	0.763546798	0.236453202	0.907407407	0.816666667	0.859649123	0.913236601	0.086763399	0.557998484	0.713178295	0.626116546
390	1	0	1	1	1	0.763546798	0.236453202	0.907407407	0.816666667	0.859649123	0.913236601	0.086763399	0.557998484	0.713178295	0.626116546
390	1	0	1	1	1	0.763546798	0.236453202	0.907407407	0.816666667	0.859649123	0.913236601	0.086763399	0.557998484	0.713178295	0.626116546
390	1	0	1	1	1	0.763546798	0.236453202	0.907407407	0.816666667	0.859649123	0.913236601	0.086763399	0.557998484	0.713178295	0.626116546
390	1	0	1	1	1	0.763546798	0.236453202	0.907407407	0.816666667	0.859649123	0.913236601	0.086763399	0.557998484	0.713178295	0.626116546
390	1	0	1	1	1	0.763546798	0.236453202	0.907407407	0.816666667	0.859649123	0.913236601	0.086763399	0.557998484	0.713178295	0.626116546
390	1	0	1	1	1	0.763546798	0.236453202	0.907407407	0.816666667	0.859649123	0.913236601	0.086763399	0.557998484	0.713178295	0.626116546
390	1	0	1	1	1	0.763546798	0.236453202	0.907407407	0.816666667	0.859649123	0.913236601	0.086763399	0.557998484	0.713178295	0.626116546
390	1	0	1	1	1	0.763546798	0.236453202	0.907407407	0.816666667	0.859649123	0.913236601	0.086763399	0.557998484	0.713178295	0.626116546
390	1	0	1	1	1	0.763546798	0.236453202	0.907407407	0.816666667	0.859649123	0.913236601	0.086763399	0.557998484	0.713178295	0.626116546
390	1	0	1	1	1	0.763546798	0.236453202	0.907407407	0.816666667	0.859649123	0.913236601	0.086763399	0.557998484	0.713178295	0.626116546
390	1	0	1	1	1	0.763546798	0.236453202	0.907407407	0.816666667	0.859649123	0.913236601	0.086763399	0.557998484	0.713178295	0.626116546
390	1	0	1	1	1	0.763546798	0.236453202	0.907407407	0.816666667	0.859649123	0.913236601	0.086763399	0.557998484	0.713178295	0.626116546
390	1	0	1	1	1	0.763546798	0.236453202	0.907407407	0.816666667	0.859649123	0.913236601	0.086763399	0.557998484	0.713178295	0.626116546
390	1	0	1	1	1	0.763546798	0.236453202	0.907407407	0.816666667	0.859649123	0.913236601	0.086763399	0.557998484	0.713178295	0.626116546
390	1	0	1	1	1	0.763546798	0.236453202	0.907407407	0.816666667	0.859649123	0.913236601	0.086763399	0.557998484	0.713178295	0.626116546
390	1	0	1	1	1	0.763546798	0.236453202	0.907407407	0.816666667	0.859649123	0.913236601	0.086763399	0.557998484	0.713178295	0.626116546
390	1	0	1	1	1	0.763546798	0.236453202	0.907407407	0.816666667	0.859649123	0.913236601	0.086763399	0.557998484	0.713178295	0.626116546
390	1	0	1	1	1	0.763546798	0.236453202	0.907407407	0.816666667	0.859649123	0.913236601	0.086763399	0.557998484	0.713178295	0.626116546
390	1	0	1	1	1	0.763546798	0.236453202	0.907407407	0.816666667	0.859649123	0.913236601	0.086763399	0.557998484	0.713178295	0.626116546
390	1	0	1	1	1	0.763546798	0.236453202	0.907407407	0.816666667	0.859649123	0.913236601	0.086763399	0.557998484	0.713178295	0.626116546
390	1	0	1	1	1	0.763546798	0.236453202	0.907407407	0.816666667	0.859649123	0.913236601	0.086763399	0.557998484	0.713178295	0.626116546
390	1	0	1	1	1	0.763546798	0.236453202	0.907407407	0.816666667	0.859649123	0.913236601	0.086763399	0.557998484	0.713178295	0.626116546
390	1	0	1	1	1	0.763546798	0.236453202	0.907407407	0.816666667	0.859649123	0.913236601	0.086763399	0.557998484	0.713178295	0.626116546
390	1	0	1	1	1	0.763546798	0.236453202	0.907407407	0.816666667	0.859649123	0.913236601	0.086763399	0.557998484	0.713178295	0.626116546
390	1	0	1	1	1	0.763546798	0.236453202	0.907407407	0.816666667	0.859649123	0.913236601	0.086763399	0.557998484	0.713178295	0.626116546
390	1	0	1	1	1	0.763546798	0.236453202	0.907407407	0.816666667	0.859649123	0.913236601	0.086763399	0.557998484	0.713178295	0.626116546
390	1	0	1	1	1	0.763546798	0.236453202	0.907407407	0.816666667	0.859649123	0.913236601	0.086763399	0.557998484	0.713178295	0.626116546
390	1	0	1	1	1	0.763546798	0.236453202	0.907407407	0.816666667	0.859649123	0.913236601	0.086763399	0.557998484	0.713178295	0.626116546
390	1	0	1	1	1	0.763546798	0.236453202	0.907407407	0.816666667	0.859649123	0.913236601	0.086763399	0.557998484	0.713178295	0.626116546
390	1	0	1	1	1	0.763546798	0.236453202	0.907407407	0.816666667	0.859649123	0.913236601	0.086763399	0.557998484	0.713178295	0.626116546
390	1	0	1	1	1	0.763546798	0.236453202	0.907407407	0.816666667	0.859649123	0.913236601	0.086763399	0.557998484	0.713178295	0.626116546
390	1	0	1	1	1	0.763546798	0.236453202	0.907407407	0.816666667	0.859649123	0.913236601	0.086763399	0.557998484	0.713178295	0.626116546
390	1	0	1	1	1	0.763546798	0.236453202	0.907407407	0.816666667	0.859649123	0.913236601	0.086763399	0.557998484	0.713178295	0.626116546
390	1	0	1	1	1	0.763546798	0.236453202	0.907407407	0.816666667	0.859649123	0.913236601	0.086763399	0.557998484	0.713178295	0.626116546
390	1	0	1	1	1	0.763546798	0.236453202	0.907407407	0.816666667	0.859649123	0.913236601	0.086763399	0.557998484	0.713178295	0.626116546
390	1	0	1	1	1	0.763546798	0.236453202	0.907407407	0.816666667	0.859649123	0.913236601	0.086763399	0.557998484	0.713178295	0.626116546
390	1	0	1	1	1	0.763546798	0.236453202	0.907407407	0.816666667	0.859649123	0.913236601	0.086763399	0.557998484	0.713178295	0.626116546
390	1	0	1	1	1	0.763546798	0.236453202	0.907407407	0.816666667	0.859649123	0.913236601	0.086763399	0.557998484	0.713178295	0.626116546
390	1	0	1	1	1	0.763546798	0.236453202	0.907407407	0.816666667	0.859649123	0.913236601	0.086763399	0.557998484	0.713178295	0.626116546
390	1	0	1	1	1	0.763546798	0.236453202	0.907407407	0.816666667	0.859649123	0.913236601	0.086763399	0.557998484	0.713178295	0.626116546
390	1	0	1	1	1	0.763546798	0.236453202	0.907407407	0.816666667	0.859649123	0.913236601	0.086763399	0.557998484	0.713178295	0.626116546
390	1	0	1	1	1	0.763546798	0.236453202	0.907407407	0.816666667	0.859649123	0.913236601	0.086763399	0.557998484	0.713178295	0.626116546
390	1	0	1	1	1	0.763546798	0.236453202	0.907407407	0.816666667	0.859649123	0.913236601	0.086763399	0.557998484	0.713178295	0.626116546
390	1	0	1	1	1	0.763546798	0.236453202	0.907407407	0.816666667	0.859649123	0.913236601	0.086763399	0.557998484	0.713178295	0.626116546
390	1	0	1	1	1	0.763546798	0.236453202	0.907407407	0.816666667	0.859649123	0.913236601	0.086763399	0.557998484	0.713178295	0.626116546
390	1	0	1	1	1	0.763546798	0.236453202	0.907407407	0.816666667	0.859649123	0.913236601	0.086763399	0.557998484	0.713178295	0.626116546
390	1	0	1	1	1	0.763546798	0.236453202	0.907407407	0.816666667	0.859649123	0.913236601	0.086763399	0.557998484	0.713178295	0.626116546
390	1	0	1	1	1	0.763546798	0.236453202	0.907407407	0.816666667	0.859649123	0.913236601	0.086763399	0.557998484	0.713178295	0.626116546
390	1	0	1	1	1	0.763546798	0.236453202	0.907407407	0.816666667	0.859649123	0.913236601	0.086763399	0.557998484	0.713178295	0.626116546
390	1	0	1	1	1	0.763546798	0.236453202	0.907407407	0.816666667	0.859649123	0.913236601	0.086763399	0.557998484	0.713178295	0.626116546
390	1	0	1	1	1	0.763546798	0.236453202	0.907407407	0.816666667	0.859649123	0.913236601	0.086763399	0.557998484	0.713178295	0.626116546
390	1	0	1	1	1	0.763546798	0.236453202	0.907407407	0.816666667	0.859649123	0.913236601	0.086763399	0.557998484	0.713178295	0.626116546
390	1	0	1	1	1	0.763546798	0.236453202	0.907407407	0.816666667	0.859649123	0.913236601	0.086763399	0.557998484	0.713178295	0.626116546
390	1	0	1	1	1	0.763546798	0.236453202	0.907407407	0.816666667	0.859649123	0.913236601	0.086763399	0.557998484	0.713178295	0.626116546
390	1	0	1	1	1	0.763546798	0.236453202	0.907407407	0.816666667	0.859649123	0.913236601	0.086763399	0.557998484	0.713178295	0.626116546
390	1	0	1	1	1	0.763546798	0.236453202	0.907407407	0.816666667	0.859649123	0.913236601	0.086763399	0.557998484	0.713178295	0.626116546
390	1	0	1	1	1	0.763546798	0.236453202	0.907407407	0.816666667	0.859649123	0.913236601	0.086763399	0.557998484	0.713178295	0.626116546
390	1	0	1	1	1	0.763546798	0.236453202	0.907407407	0.816666667	0.859649123	0.913236601	0.086763399	0.557998484	0.713178295	0.626116546
390	1	0	1	1	1	0.763546798	0.236453202	0.907407407	0.816666667	0.859649123	0.913236601	0.086763399	0.557998484	0.713178295	0.626116546
390	1	0	1	1	1	0.763546798	0.236453202	0.907407407	0.816666667	0.859649123	0.913236601	0.086763399	0.557998484	0.713178295	0.626116546
390	1	0	1	1	1	0.763546798	0.236453202	0.907407407	0.816666667	0.859649123	0.913236601	0.086763399	0.557998484	0.713178295	0.626116546
390	1	0	1	1	1	0.763546798	0.236453202	0.907407407	0.816666667	0.859649123	0.913236601	0.086763399	0.557998484	0.713178295	0.626116546
390	1	0	1	1	1	0.763546798	0.236453202	0.907407407	0.816666667	0.859649123	0.913236601	0.086763399	0.557998484	0.713178295	0.626116546
390	1	0	1	1	1	0.763546798	0.236453202	0.907407407	0.816666667	0.859649123	0.913236601	0.086763399	0.557998484	0.713178295	0.626116546
390	1	0	1	1	1	0.763546798	0.236453202	0.907407407	0.816666667	0.859649123	0.913236601	0.086763399	0.557998484	0.713178295	0.626116546
390	1	0	1	1	1	0.763546798	0.236453202	0.907407407	0.816666667	0.859649123	0.913236601	0.086763399	0.557998484	0.713178295	0.626116546
390	1	0	1	1	1	0.763546798	0.236453202	0.907407407	0.816666667	0.859649123	0.913236601	0.086763399	0.557998484	0.713178295	0.626116546
390	1	0	1	1	1	0.763546798	0.236453202	0.907407407	0.816666667	0.859649123	0.913236601	0.086763399	0.557998484	0.713178295	0.626116546
390	1	0	1	1	1	0.763546798	0.236453202	0.907407407	0.816666667	0.859649123	0.913236601	0.086763399	0.557998484	0.713178295	0.626116546
389	1	0	1	1	1	0.763546798	0.236453202	0.904907975	0.819444444	0.860058309	0.913236601	0.086763399	0.557910674	0.714147287	0.626434339
389	1	0	1	1	1	0.763546798	0.236453202	0.904907975	0.819444444	0.860058309	0.913236601	0.086763399	0.557910674	0.714147287	0.626434339
389	1	0	1	1	1	0.763546798	0.236453202	0.904907975	0.819444444	0.860058309	0.913236601	0.086763399	0.557910674	0.714147287	0.626434339
389	1	0	1	1	1	0.763546798	0.236453202	0.904907975	0.819444444	0.860058309	0.913236601	0.086763399	0.557910674	0.714147287	0.626434339
389	1	0	1	1	1	0.763546798	0.236453202	0.904907975	0.819444444	0.860058309	0.913236601	0.086763399	0.557910674	0.714147287	0.626434339
389	1	0	1	1	1	0.763546798	0.236453202	0.904907975	0.819444444	0.860058309	0.913236601	0.086763399	0.557910674	0.714147287	0.626434339
389	1	0	1	1	1	0.763546798	0.236453202	0.904907975	0.819444444	0.860058309	0.913236601	0.086763399	0.557910674	0.714147287	0.626434339
389	1	0	1	1	1	0.763546798	0.236453202	0.904907975	0.819444444	0.860058309	0.913236601	0.086763399	0.557910674	0.714147287	0.626434339
389	1	0	1	1	1	0.763546798	0.236453202	0.904907975	0.819444444	0.860058309	0.913236601	0.086763399	0.557910674	0.714147287	0.626434339
389	1	0	1	1	1	0.763546798	0.236453202	0.904907975	0.819444444	0.860058309	0.913236601	0.086763399	0.557910674	0.714147287	0.626434339
389	1	0	1	1	1	0.763546798	0.236453202	0.904907975	0.819444444	0.860058309	0.913236601	0.086763399	0.557910674	0.714147287	0.626434339
389	1	0	1	1	1	0.763546798	0.236453202	0.904907975	0.819444444	0.860058309	0.913236601	0.086763399	0.557910674	0.714147287	0.626434339
389	1	0	1	1	1	0.763546798	0.236453202	0.904907975	0.819444444	0.860058309	0.913236601	0.086763399	0.557910674	0.714147287	0.626434339
389	1	0	1	1	1	0.763546798	0.236453202	0.904907975	0.819444444	0.860058309	0.913236601	0.086763399	0.557910674	0.714147287	0.626434339
389	1	0	1	1	1	0.763546798	0.236453202	0.904907975	0.819444444	0.860058309	0.913236601	0.086763399	0.557910674	0.714147287	0.626434339
389	1	0	1	1	1	0.763546798	0.236453202	0.904907975	0.819444444	0.860058309	0.913236601	0.086763399	0.557910674	0.714147287	0.626434339
389	1	0	1	1	1	0.763546798	0.236453202	0.904907975	0.819444444	0.860058309	0.913236601	0.086763399	0.557910674	0.714147287	0.626434339
389	1	0	1	1	1	0.763546798	0.236453202	0.904907975	0.819444444	0.860058309	0.913236601	0.086763399	0.557910674	0.714147287	0.626434339
389	1	0	1	1	1	0.763546798	0.236453202	0.904907975	0.819444444	0.860058309	0.913236601	0.086763399	0.557910674	0.714147287	0.626434339
389	1	0	1	1	1	0.763546798	0.236453202	0.904907975	0.819444444	0.860058309	0.913236601	0.086763399	0.557910674	0.714147287	0.626434339
389	1	0	1	1	1	0.763546798	0.236453202	0.904907975	0.819444444	0.860058309	0.913236601	0.086763399	0.557910674	0.714147287	0.626434339
389	1	0	1	1	1	0.763546798	0.236453202	0.904907975	0.819444444	0.860058309	0.913236601	0.086763399	0.557910674	0.714147287	0.626434339
389	1	0	1	1	1	0.763546798	0.236453202	0.904907975	0.819444444	0.860058309	0.913236601	0.086763399	0.557910674	0.714147287	0.626434339
389	1	0	1	1	1	0.763546798	0.236453202	0.904907975	0.819444444	0.860058309	0.913236601	0.086763399	0.557910674	0.714147287	0.626434339
389	1	0	1	1	1	0.763546798	0.236453202	0.904907975	0.819444444	0.860058309	0.913236601	0.086763399	0.557910674	0.714147287	0.626434339
389	1	0	1	1	1	0.763546798	0.236453202	0.904907975	0.819444444	0.860058309	0.913236601	0.086763399	0.557910674	0.714147287	0.626434339
389	1	0	1	1	1	0.763546798	0.236453202	0.904907975	0.819444444	0.860058309	0.913236601	0.086763399	0.557910674	0.714147287	0.626434339
389	1	0	1	1	1	0.763546798	0.236453202	0.904907975	0.819444444	0.860058309	0.913236601	0.086763399	0.557910674	0.714147287	0.626434339
389	1	0	1	1	1	0.763546798	0.236453202	0.904907975	0.819444444	0.860058309	0.913236601	0.086763399	0.557910674	0.714147287	0.626434339
389	1	0	1	1	1	0.763546798	0.236453202	0.904907975	0.819444444	0.860058309	0.913236601	0.086763399	0.557910674	0.714147287	0.626434339
389	1	0	1	1	1	0.763546798	0.236453202	0.904907975	0.819444444	0.860058309	0.913236601	0.086763399	0.557910674	0.714147287	0.626434339
389	1	0	1	1	1	0.763546798	0.236453202	0.904907975	0.819444444	0.860058309	0.913236601	0.086763399	0.557910674	0.714147287	0.626434339
389	1	0	1	1	1	0.763546798	0.236453202	0.904907975	0.819444444	0.860058309	0.913236601	0.086763399	0.557910674	0.714147287	0.626434339
389	1	0	1	1	1	0.763546798	0.236453202	0.904907975	0.819444444	0.860058309	0.913236601	0.086763399	0.557910674	0.714147287	0.626434339
389	1	0	1	1	1	0.763546798	0.236453202	0.904907975	0.819444444	0.860058309	0.913236601	0.086763399	0.557910674	0.714147287	0.626434339
389	1	0	1	1	1	0.763546798	0.236453202	0.904907975	0.819444444	0.860058309	0.913236601	0.086763399	0.557910674	0.714147287	0.626434339
389	1	0	1	1	1	0.763546798	0.236453202	0.904907975	0.819444444	0.860058309	0.913236601	0.086763399	0.557910674	0.714147287	0.626434339
389	1	0	1	1	1	0.763546798	0.236453202	0.904907975	0.819444444	0.860058309	0.913236601	0.086763399	0.557910674	0.714147287	0.626434339
389	1	0	1	1	1	0.763546798	0.236453202	0.904907975	0.819444444	0.860058309	0.913236601	0.086763399	0.557910674	0.714147287	0.626434339
389	1	0	1	1	1	0.763546798	0.236453202	0.904907975	0.819444444	0.860058309	0.913236601	0.086763399	0.557910674	0.714147287	0.626434339
389	1	0	1	1	1	0.763546798	0.236453202	0.904907975	0.819444444	0.860058309	0.913236601	0.086763399	0.557910674	0.714147287	0.626434339
389	1	0	1	1	1	0.763546798	0.236453202	0.904907975	0.819444444	0.860058309	0.913236601	0.086763399	0.557910674	0.714147287	0.626434339
389	1	0	1	1	1	0.763546798	0.236453202	0.904907975	0.819444444	0.860058309	0.913236601	0.086763399	0.557910674	0.714147287	0.626434339
389	1	0	1	1	1	0.763546798	0.236453202	0.904907975	0.819444444	0.860058309	0.913236601	0.086763399	0.557910674	0.714147287	0.626434339
389	1	0	1	1	1	0.763546798	0.236453202	0.904907975	0.819444444	0.860058309	0.913236601	0.086763399	0.557910674	0.714147287	0.626434339
389	1	0	1	1	1	0.763546798	0.236453202	0.904907975	0.819444444	0.860058309	0.913236601	0.086763399	0.557910674	0.714147287	0.626434339
389	1	0	1	1	1	0.763546798	0.236453202	0.904907975	0.819444444	0.860058309	0.913236601	0.086763399	0.557910674	0.714147287	0.626434339
389	1	0	1	1	1	0.763546798	0.236453202	0.904907975	0.819444444	0.860058309	0.913236601	0.086763399	0.557910674	0.714147287	0.626434339
389	1	0	1	1	1	0.763546798	0.236453202	0.904907975	0.819444444	0.860058309	0.913236601	0.086763399	0.557910674	0.714147287	0.626434339
389	1	0	1	1	1	0.763546798	0.236453202	0.904907975	0.819444444	0.860058309	0.913236601	0.086763399	0.557910674	0.714147287	0.626434339
389	1	0	1	1	1	0.763546798	0.236453202	0.904907975	0.819444444	0.860058309	0.913236601	0.086763399	0.557910674	0.714147287	0.626434339
389	1	0	1	1	1	0.763546798	0.236453202	0.904907975	0.819444444	0.860058309	0.913236601	0.086763399	0.557910674	0.714147287	0.626434339
389	1	0	1	1	1	0.763546798	0.236453202	0.904907975	0.819444444	0.860058309	0.913236601	0.086763399	0.557910674	0.714147287	0.626434339
389	1	0	1	1	1	0.763546798	0.236453202	0.904907975	0.819444444	0.860058309	0.913236601	0.086763399	0.557910674	0.714147287	0.626434339
389	1	0	1	1	1	0.763546798	0.236453202	0.904907975	0.819444444	0.860058309	0.913236601	0.086763399	0.557910674	0.714147287	0.626434339
389	1	0	1	1	1	0.763546798	0.236453202	0.904907975	0.819444444	0.860058309	0.913236601	0.086763399	0.557910674	0.714147287	0.626434339
389	1	0	1	1	1	0.763546798	0.236453202	0.904907975	0.819444444	0.860058309	0.913236601	0.086763399	0.557910674	0.714147287	0.626434339
389	1	0	1	1	1	0.763546798	0.236453202	0.904907975	0.819444444	0.860058309	0.913236601	0.086763399	0.557910674	0.714147287	0.626434339
389	1	0	1	1	1	0.763546798	0.236453202	0.904907975	0.819444444	0.860058309	0.913236601	0.086763399	0.557910674	0.714147287	0.626434339
389	1	0	1	1	1	0.763546798	0.236453202	0.904907975	0.819444444	0.860058309	0.913236601	0.086763399	0.557910674	0.714147287	0.626434339
389	1	0	1	1	1	0.763546798	0.236453202	0.904907975	0.819444444	0.860058309	0.913236601	0.086763399	0.557910674	0.714147287	0.626434339
389	1	0	1	1	1	0.763546798	0.236453202	0.904907975	0.819444444	0.860058309	0.913236601	0.086763399	0.557910674	0.714147287	0.626434339
389	1	0	1	1	1	0.763546798	0.236453202	0.904907975	0.819444444	0.860058309	0.913236601	0.086763399	0.557910674	0.714147287	0.626434339
389	1	0	1	1	1	0.763546798	0.236453202	0.904907975	0.819444444	0.860058309	0.913236601	0.086763399	0.557910674	0.714147287	0.626434339
389	1	0	1	1	1	0.763546798	0.236453202	0.904907975	0.819444444	0.860058309	0.913236601	0.086763399	0.557910674	0.714147287	0.626434339
389	1	0	1	1	1	0.763546798	0.236453202	0.904907975	0.819444444	0.860058309	0.913236601	0.086763399	0.557910674	0.714147287	0.626434339
389	1	0	1	1	1	0.763546798	0.236453202	0.904907975	0.819444444	0.860058309	0.913236601	0.086763399	0.557910674	0.714147287	0.626434339
389	1	0	1	1	1	0.763546798	0.236453202	0.904907975	0.819444444	0.860058309	0.913236601	0.086763399	0.557910674	0.714147287	0.626434339
389	1	0	1	1	1	0.763546798	0.236453202	0.904907975	0.819444444	0.860058309	0.913236601	0.086763399	0.557910674	0.714147287	0.626434339
389	1	0	1	1	1	0.763546798	0.236453202	0.904907975	0.819444444	0.860058309	0.913236601	0.086763399	0.557910674	0.714147287	0.626434339
389	1	0	1	1	1	0.763546798	0.236453202	0.904907975	0.819444444	0.860058309	0.913236601	0.086763399	0.557910674	0.714147287	0.626434339
389	1	0	1	1	1	0.763546798	0.236453202	0.904907975	0.819444444	0.860058309	0.913236601	0.086763399	0.557910674	0.714147287	0.626434339
389	1	0	1	1	1	0.763546798	0.236453202	0.904907975	0.819444444	0.860058309	0.913236601	0.086763399	0.557910674	0.714147287	0.626434339
389	1	0	1	1	1	0.763546798	0.236453202	0.904907975	0.819444444	0.860058309	0.913236601	0.086763399	0.557910674	0.714147287	0.626434339
389	1	0	1	1	1	0.763546798	0.236453202	0.904907975	0.819444444	0.860058309	0.913236601	0.086763399	0.557910674	0.714147287	0.626434339
389	1	0	1	1	1	0.763546798	0.236453202	0.904907975	0.819444444	0.860058309	0.913236601	0.086763399	0.557910674	0.714147287	0.626434339
389	1	0	1	1	1	0.763546798	0.236453202	0.904907975	0.819444444	0.860058309	0.913236601	0.086763399	0.557910674	0.714147287	0.626434339
389	1	0	1	1	1	0.763546798	0.236453202	0.904907975	0.819444444	0.860058309	0.913236601	0.086763399	0.557910674	0.714147287	0.626434339
389	1	0	1	1	1	0.763546798	0.236453202	0.904907975	0.819444444	0.860058309	0.913236601	0.086763399	0.557910674	0.714147287	0.626434339
389	1	0	1	1	1	0.763546798	0.236453202	0.904907975	0.819444444	0.860058309	0.913236601	0.086763399	0.557910674	0.714147287	0.626434339
389	1	0	1	1	1	0.763546798	0.236453202	0.904907975	0.819444444	0.860058309	0.913236601	0.086763399	0.557910674	0.714147287	0.626434339
389	1	0	1	1	1	0.763546798	0.236453202	0.904907975	0.819444444	0.860058309	0.913236601	0.086763399	0.557910674	0.714147287	0.626434339
389	1	0	1	1	1	0.763546798	0.236453202	0.904907975	0.819444444	0.860058309	0.913236601	0.086763399	0.557910674	0.714147287	0.626434339
389	1	0	1	1	1	0.763546798	0.236453202	0.904907975	0.819444444	0.860058309	0.913236601	0.086763399	0.557910674	0.714147287	0.626434339
389	1	0	1	1	1	0.763546798	0.236453202	0.904907975	0.819444444	0.860058309	0.913236601	0.086763399	0.557910674	0.714147287	0.626434339
389	1	0	1	1	1	0.763546798	0.236453202	0.904907975	0.819444444	0.860058309	0.913236601	0.086763399	0.557910674	0.714147287	0.626434339
389	1	0	1	1	1	0.763546798	0.236453202	0.904907975	0.819444444	0.860058309	0.913236601	0.086763399	0.557910674	0.714147287	0.626434339
389	1	0	1	1	1	0.763546798	0.236453202	0.904907975	0.819444444	0.860058309	0.913236601	0.086763399	0.557910674	0.714147287	0.626434339
389	1	0	1	1	1	0.763546798	0.236453202	0.904907975	0.819444444	0.860058309	0.913236601	0.086763399	0.557910674	0.714147287	0.626434339
389	1	0	1	1	1	0.763546798	0.236453202	0.904907975	0.819444444	0.860058309	0.913236601	0.086763399	0.557910674	0.714147287	0.626434339
389	1	0	1	1	1	0.763546798	0.236453202	0.904907975	0.819444444	0.860058309	0.913236601	0.086763399	0.557910674	0.714147287	0.626434339
389	1	0	1	1	1	0.763546798	0.236453202	0.904907975	0.819444444	0.860058309	0.913236601	0.086763399	0.557910674	0.714147287	0.626434339
389	1	0	1	1	1	0.763546798	0.236453202	0.904907975	0.819444444	0.860058309	0.913236601	0.086763399	0.557910674	0.714147287	0.626434339
389	1	0	1	1	1	0.763546798	0.236453202	0.904907975	0.819444444	0.860058309	0.913236601	0.086763399	0.557910674	0.714147287	0.626434339
389	1	0	1	1	1	0.763546798	0.236453202	0.904907975	0.819444444	0.860058309	0.913236601	0.086763399	0.557910674	0.714147287	0.626434339
389	1	0	1	1	1	0.763546798	0.236453202	0.904907975	0.819444444	0.860058309	0.913236601	0.086763399	0.557910674	0.714147287	0.626434339
389	1	0	1	1	1	0.763546798	0.236453202	0.904907975	0.819444444	0.860058309	0.913236601	0.086763399	0.557910674	0.714147287	0.626434339
389	1	0	1	1	1	0.763546798	0.236453202	0.904907975	0.819444444	0.860058309	0.913236601	0.086763399	0.557910674	0.714147287	0.626434339
389	1	0	1	1	1	0.763546798	0.236453202	0.904907975	0.819444444	0.860058309	0.913236601	0.086763399	0.557910674	0.714147287	0.626434339
389	1	0	1	1	1	0.763546798	0.236453202	0.904907975	0.819444444	0.860058309	0.913236601	0.086763399	0.557910674	0.714147287	0.626434339
389	1	0	1	1	1	0.763546798	0.236453202	0.904907975	0.819444444	0.860058309	0.913236601	0.086763399	0.557910674	0.714147287	0.626434339
389	1	0	1	1	1	0.763546798	0.236453202	0.904907975	0.819444444	0.860058309	0.913236601	0.086763399	0.557910674	0.714147287	0.626434339
389	1	0	1	1	1	0.763546798	0.236453202	0.904907975	0.819444444	0.860058309	0.913236601	0.086763399	0.557910674	0.714147287	0.626434339
389	1	0	1	1	1	0.763546798	0.236453202	0.904907975	0.819444444	0.860058309	0.913236601	0.086763399	0.557910674	0.714147287	0.626434339
389	1	0	1	1	1	0.763546798	0.236453202	0.904907975	0.819444444	0.860058309	0.913236601	0.086763399	0.557910674	0.714147287	0.626434339
389	1	0	1	1	1	0.763546798	0.236453202	0.904907975	0.819444444	0.860058309	0.913236601	0.086763399	0.557910674	0.714147287	0.626434339
389	1	0	1	1	1	0.763546798	0.236453202	0.904907975	0.819444444	0.860058309	0.913236601	0.086763399	0.557910674	0.714147287	0.626434339
389	1	0	1	1	1	0.763546798	0.236453202	0.904907975	0.819444444	0.860058309	0.913236601	0.086763399	0.557910674	0.714147287	0.626434339
389	1	0	1	1	1	0.763546798	0.236453202	0.904907975	0.819444444	0.860058309	0.913236601	0.086763399	0.557910674	0.714147287	0.626434339
389	1	0	1	1	1	0.763546798	0.236453202	0.904907975	0.819444444	0.860058309	0.913236601	0.086763399	0.557910674	0.714147287	0.626434339
389	1	0	1	1	1	0.763546798	0.236453202	0.904907975	0.819444444	0.860058309	0.913236601	0.086763399	0.557910674	0.714147287	0.626434339
389	1	0	1	1	1	0.763546798	0.236453202	0.904907975	0.819444444	0.860058309	0.913236601	0.086763399	0.557910674	0.714147287	0.626434339
389	1	0	1	1	1	0.763546798	0.236453202	0.904907975	0.819444444	0.860058309	0.913236601	0.086763399	0.557910674	0.714147287	0.626434339
389	1	0	1	1	1	0.763546798	0.236453202	0.904907975	0.819444444	0.860058309	0.913236601	0.086763399	0.557910674	0.714147287	0.626434339
389	1	0	1	1	1	0.763546798	0.236453202	0.904907975	0.819444444	0.860058309	0.913236601	0.086763399	0.557910674	0.714147287	0.626434339
389	1	0	1	1	1	0.763546798	0.236453202	0.904907975	0.819444444	0.860058309	0.913236601	0.086763399	0.557910674	0.714147287	0.626434339
389	1	0	1	1	1	0.763546798	0.236453202	0.904907975	0.819444444	0.860058309	0.913236601	0.086763399	0.557910674	0.714147287	0.626434339
389	1	0	1	1	1	0.763546798	0.236453202	0.904907975	0.819444444	0.860058309	0.913236601	0.086763399	0.557910674	0.714147287	0.626434339
389	1	0	1	1	1	0.763546798	0.236453202	0.904907975	0.819444444	0.860058309	0.913236601	0.086763399	0.557910674	0.714147287	0.626434339
389	1	0	1	1	1	0.763546798	0.236453202	0.904907975	0.819444444	0.860058309	0.913236601	0.086763399	0.557910674	0.714147287	0.626434339
389	1	0	1	1	1	0.763546798	0.236453202	0.904907975	0.819444444	0.860058309	0.913236601	0.086763399	0.557910674	0.714147287	0.626434339
389	1	0	1	1	1	0.763546798	0.236453202	0.904907975	0.819444444	0.860058309	0.913236601	0.086763399	0.557910674	0.714147287	0.626434339
389	1	0	1	1	1	0.763546798	0.236453202	0.904907975	0.819444444	0.860058309	0.913236601	0.086763399	0.557910674	0.714147287	0.626434339
389	1	0	1	1	1	0.763546798	0.236453202	0.904907975	0.819444444	0.860058309	0.913236601	0.086763399	0.557910674	0.714147287	0.626434339
389	1	0	1	1	1	0.763546798	0.236453202	0.904907975	0.819444444	0.860058309	0.913236601	0.086763399	0.557910674	0.714147287	0.626434339
389	1	0	1	1	1	0.763546798	0.236453202	0.904907975	0.819444444	0.860058309	0.913236601	0.086763399	0.557910674	0.714147287	0.626434339
389	1	0	1	1	1	0.763546798	0.236453202	0.904907975	0.819444444	0.860058309	0.913236601	0.086763399	0.557910674	0.714147287	0.626434339
389	1	0	1	1	1	0.763546798	0.236453202	0.904907975	0.819444444	0.860058309	0.913236601	0.086763399	0.557910674	0.714147287	0.626434339
389	1	0	1	1	1	0.763546798	0.236453202	0.904907975	0.819444444	0.860058309	0.913236601	0.086763399	0.557910674	0.714147287	0.626434339
389	1	0	1	1	1	0.763546798	0.236453202	0.904907975	0.819444444	0.860058309	0.913236601	0.086763399	0.557910674	0.714147287	0.626434339
389	1	0	1	1	1	0.763546798	0.236453202	0.904907975	0.819444444	0.860058309	0.913236601	0.086763399	0.557910674	0.714147287	0.626434339
389	1	0	1	1	1	0.763546798	0.236453202	0.904907975	0.819444444	0.860058309	0.913236601	0.086763399	0.557910674	0.714147287	0.626434339
389	1	0	1	1	1	0.763546798	0.236453202	0.904907975	0.819444444	0.860058309	0.913236601	0.086763399	0.557910674	0.714147287	0.626434339
389	1	0	1	1	1	0.763546798	0.236453202	0.904907975	0.819444444	0.860058309	0.913236601	0.086763399	0.557910674	0.714147287	0.626434339
389	1	0	1	1	1	0.763546798	0.236453202	0.904907975	0.819444444	0.860058309	0.913236601	0.086763399	0.557910674	0.714147287	0.626434339
389	1	0	1	1	1	0.763546798	0.236453202	0.904907975	0.819444444	0.860058309	0.913236601	0.086763399	0.557910674	0.714147287	0.626434339
389	1	0	1	1	1	0.763546798	0.236453202	0.904907975	0.819444444	0.860058309	0.913236601	0.086763399	0.557910674	0.714147287	0.626434339
389	1	0	1	1	1	0.763546798	0.236453202	0.904907975	0.819444444	0.860058309	0.913236601	0.086763399	0.557910674	0.714147287	0.626434339
389	1	0	1	1	1	0.763546798	0.236453202	0.904907975	0.819444444	0.860058309	0.913236601	0.086763399	0.557910674	0.714147287	0.626434339
389	1	0	1	1	1	0.763546798	0.236453202	0.904907975	0.819444444	0.860058309	0.913236601	0.086763399	0.557910674	0.714147287	0.626434339
389	1	0	1	1	1	0.763546798	0.236453202	0.904907975	0.819444444	0.860058309	0.913236601	0.086763399	0.557910674	0.714147287	0.626434339
389	1	0	1	1	1	0.763546798	0.236453202	0.904907975	0.819444444	0.860058309	0.913236601	0.086763399	0.557910674	0.714147287	0.626434339
389	1	0	1	1	1	0.763546798	0.236453202	0.904907975	0.819444444	0.860058309	0.913236601	0.086763399	0.557910674	0.714147287	0.626434339
389	1	0	1	1	1	0.763546798	0.236453202	0.904907975	0.819444444	0.860058309	0.913236601	0.086763399	0.557910674	0.714147287	0.626434339
389	1	0	1	1	1	0.763546798	0.236453202	0.904907975	0.819444444	0.860058309	0.913236601	0.086763399	0.557910674	0.714147287	0.626434339
389	1	0	1	1	1	0.763546798	0.236453202	0.904907975	0.819444444	0.860058309	0.913236601	0.086763399	0.557910674	0.714147287	0.626434339
389	1	0	1	1	1	0.763546798	0.236453202	0.904907975	0.819444444	0.860058309	0.913236601	0.086763399	0.557910674	0.714147287	0.626434339
389	1	0	1	1	1	0.763546798	0.236453202	0.904907975	0.819444444	0.860058309	0.913236601	0.086763399	0.557910674	0.714147287	0.626434339
389	1	0	1	1	1	0.763546798	0.236453202	0.904907975	0.819444444	0.860058309	0.913236601	0.086763399	0.557910674	0.714147287	0.626434339
389	1	0	1	1	1	0.763546798	0.236453202	0.904907975	0.819444444	0.860058309	0.913236601	0.086763399	0.557910674	0.714147287	0.626434339
389	1	0	1	1	1	0.763546798	0.236453202	0.904907975	0.819444444	0.860058309	0.913236601	0.086763399	0.557910674	0.714147287	0.626434339
389	1	0	1	1	1	0.763546798	0.236453202	0.904907975	0.819444444	0.860058309	0.913236601	0.086763399	0.557910674	0.714147287	0.626434339
389	1	0	1	1	1	0.763546798	0.236453202	0.904907975	0.819444444	0.860058309	0.913236601	0.086763399	0.557910674	0.714147287	0.626434339
389	1	0	1	1	1	0.763546798	0.236453202	0.904907975	0.819444444	0.860058309	0.913236601	0.086763399	0.557910674	0.714147287	0.626434339
389	1	0	1	1	1	0.763546798	0.236453202	0.904907975	0.819444444	0.860058309	0.913236601	0.086763399	0.557910674	0.714147287	0.626434339
389	1	0	1	1	1	0.763546798	0.236453202	0.904907975	0.819444444	0.860058309	0.913236601	0.086763399	0.557910674	0.714147287	0.626434339
389	1	0	1	1	1	0.763546798	0.236453202	0.904907975	0.819444444	0.860058309	0.913236601	0.086763399	0.557910674	0.714147287	0.626434339
389	1	0	1	1	1	0.763546798	0.236453202	0.904907975	0.819444444	0.860058309	0.913236601	0.086763399	0.557910674	0.714147287	0.626434339
389	1	0	1	1	1	0.763546798	0.236453202	0.904907975	0.819444444	0.860058309	0.913236601	0.086763399	0.557910674	0.714147287	0.626434339
389	1	0	1	1	1	0.763546798	0.236453202	0.904907975	0.819444444	0.860058309	0.913236601	0.086763399	0.557910674	0.714147287	0.626434339
389	1	0	1	1	1	0.763546798	0.236453202	0.904907975	0.819444444	0.860058309	0.913236601	0.086763399	0.557910674	0.714147287	0.626434339
389	1	0	1	1	1	0.763546798	0.236453202	0.904907975	0.819444444	0.860058309	0.913236601	0.086763399	0.557910674	0.714147287	0.626434339
389	1	0	1	1	1	0.763546798	0.236453202	0.904907975	0.819444444	0.860058309	0.913236601	0.086763399	0.557910674	0.714147287	0.626434339
389	1	0	1	1	1	0.763546798	0.236453202	0.904907975	0.819444444	0.860058309	0.913236601	0.086763399	0.557910674	0.714147287	0.626434339
389	1	0	1	1	1	0.763546798	0.236453202	0.904907975	0.819444444	0.860058309	0.913236601	0.086763399	0.557910674	0.714147287	0.626434339
389	1	0	1	1	1	0.763546798	0.236453202	0.904907975	0.819444444	0.860058309	0.913236601	0.086763399	0.557910674	0.714147287	0.626434339
389	1	0	1	1	1	0.763546798	0.236453202	0.904907975	0.819444444	0.860058309	0.913236601	0.086763399	0.557910674	0.714147287	0.626434339
389	1	0	1	1	1	0.763546798	0.236453202	0.904907975	0.819444444	0.860058309	0.913236601	0.086763399	0.557910674	0.714147287	0.626434339
389	1	0	1	1	1	0.763546798	0.236453202	0.904907975	0.819444444	0.860058309	0.913236601	0.086763399	0.557910674	0.714147287	0.626434339
389	1	0	1	1	1	0.763546798	0.236453202	0.904907975	0.819444444	0.860058309	0.913236601	0.086763399	0.557910674	0.714147287	0.626434339
389	1	0	1	1	1	0.763546798	0.236453202	0.904907975	0.819444444	0.860058309	0.913236601	0.086763399	0.557910674	0.714147287	0.626434339
389	1	0	1	1	1	0.763546798	0.236453202	0.904907975	0.819444444	0.860058309	0.913236601	0.086763399	0.557910674	0.714147287	0.626434339
389	1	0	1	1	1	0.763546798	0.236453202	0.904907975	0.819444444	0.860058309	0.913236601	0.086763399	0.557910674	0.714147287	0.626434339
389	1	0	1	1	1	0.763546798	0.236453202	0.904907975	0.819444444	0.860058309	0.913236601	0.086763399	0.557910674	0.714147287	0.626434339
389	1	0	1	1	1	0.763546798	0.236453202	0.904907975	0.819444444	0.860058309	0.913236601	0.086763399	0.557910674	0.714147287	0.626434339
389	1	0	1	1	1	0.763546798	0.236453202	0.904907975	0.819444444	0.860058309	0.913236601	0.086763399	0.557910674	0.714147287	0.626434339
389	1	0	1	1	1	0.763546798	0.236453202	0.904907975	0.819444444	0.860058309	0.913236601	0.086763399	0.557910674	0.714147287	0.626434339
389	1	0	1	1	1	0.763546798	0.236453202	0.904907975	0.819444444	0.860058309	0.913236601	0.086763399	0.557910674	0.714147287	0.626434339
389	1	0	1	1	1	0.763546798	0.236453202	0.904907975	0.819444444	0.860058309	0.913236601	0.086763399	0.557910674	0.714147287	0.626434339
389	1	0	1	1	1	0.763546798	0.236453202	0.904907975	0.819444444	0.860058309	0.913236601	0.086763399	0.557910674	0.714147287	0.626434339
389	1	0	1	1	1	0.763546798	0.236453202	0.904907975	0.819444444	0.860058309	0.913236601	0.086763399	0.557910674	0.714147287	0.626434339
389	1	0	1	1	1	0.763546798	0.236453202	0.904907975	0.819444444	0.860058309	0.913236601	0.086763399	0.557910674	0.714147287	0.626434339
389	1	0	1	1	1	0.763546798	0.236453202	0.904907975	0.819444444	0.860058309	0.913236601	0.086763399	0.557910674	0.714147287	0.626434339
389	1	0	1	1	1	0.763546798	0.236453202	0.904907975	0.819444444	0.860058309	0.913236601	0.086763399	0.557910674	0.714147287	0.626434339
389	1	0	1	1	1	0.763546798	0.236453202	0.904907975	0.819444444	0.860058309	0.913236601	0.086763399	0.557910674	0.714147287	0.626434339
389	1	0	1	1	1	0.763546798	0.236453202	0.904907975	0.819444444	0.860058309	0.913236601	0.086763399	0.557910674	0.714147287	0.626434339
389	1	0	1	1	1	0.763546798	0.236453202	0.904907975	0.819444444	0.860058309	0.913236601	0.086763399	0.557910674	0.714147287	0.626434339
389	1	0	1	1	1	0.763546798	0.236453202	0.904907975	0.819444444	0.860058309	0.913236601	0.086763399	0.557910674	0.714147287	0.626434339
389	1	0	1	1	1	0.763546798	0.236453202	0.904907975	0.819444444	0.860058309	0.913236601	0.086763399	0.557910674	0.714147287	0.626434339
389	1	0	1	1	1	0.763546798	0.236453202	0.904907975	0.819444444	0.860058309	0.913236601	0.086763399	0.557910674	0.714147287	0.626434339
389	1	0	1	1	1	0.763546798	0.236453202	0.904907975	0.819444444	0.860058309	0.913236601	0.086763399	0.557910674	0.714147287	0.626434339
389	1	0	1	1	1	0.763546798	0.236453202	0.904907975	0.819444444	0.860058309	0.913236601	0.086763399	0.557910674	0.714147287	0.626434339
389	1	0	1	1	1	0.763546798	0.236453202	0.904907975	0.819444444	0.860058309	0.913236601	0.086763399	0.557910674	0.714147287	0.626434339
389	1	0	1	1	1	0.763546798	0.236453202	0.904907975	0.819444444	0.860058309	0.913236601	0.086763399	0.557910674	0.714147287	0.626434339
