# Supplementary material for: An Improved Hybrid Feature Selection Algorithm for Electric Charge Recovery Risk
Source: Hindawi journal article supplement (doi:10.1155/2020/8479341), 2020-08-28
Supplement: f1 [file 8479341.f1.zip › 8479341.f1/Experimental Results/201806/BGA_results.csv]

features_num	Accuracy_high	Loss_high	Precission_high	Recall_high	F1_high	Accuracy_med	Loss_med	Precission_med	Recall_med	F1_med	Accuracy_low	Loss_low	Precission_low	Recall_low	F1_low
273	1.0	0.0	1.0	1.0	1.0	0.7162162162162162	0.28378378378378377	0.8992537313432836	0.7554858934169278	0.8211243611584327	0.9026069847515986	0.09739301524840138	0.5313710302091402	0.6405228758169934	0.5808636748518206
273	1.0	0.0	1.0	1.0	1.0	0.7162162162162162	0.28378378378378377	0.8992537313432836	0.7554858934169278	0.8211243611584327	0.902803738317757	0.09719626168224305	0.5321456235476375	0.6414565826330533	0.5817104149026249
273	1.0	0.0	1.0	1.0	1.0	0.7162162162162162	0.28378378378378377	0.8992537313432836	0.7554858934169278	0.8211243611584327	0.902803738317757	0.09719626168224305	0.5321456235476375	0.6414565826330533	0.5817104149026249
273	1.0	0.0	1.0	1.0	1.0	0.7162162162162162	0.28378378378378377	0.8992537313432836	0.7554858934169278	0.8211243611584327	0.902803738317757	0.09719626168224305	0.5321456235476375	0.6414565826330533	0.5817104149026249
310	1.0	0.0	1.0	1.0	1.0	0.8505291005291006	0.14947089947089942	0.9829642248722317	0.8485294117647059	0.9108129439621152	0.9078086672117743	0.09219133278822567	0.42746314972847166	0.7706293706293706	0.5499001996007984
310	1.0	0.0	1.0	1.0	1.0	0.8505291005291006	0.14947089947089942	0.9829642248722317	0.8485294117647059	0.9108129439621152	0.9078086672117743	0.09219133278822567	0.42746314972847166	0.7706293706293706	0.5499001996007984
310	1.0	0.0	1.0	1.0	1.0	0.8505291005291006	0.14947089947089942	0.9829642248722317	0.8485294117647059	0.9108129439621152	0.9078086672117743	0.09219133278822567	0.42746314972847166	0.7706293706293706	0.5499001996007984
310	1.0	0.0	1.0	1.0	1.0	0.8447606727037517	0.15523932729624834	0.9718076285240465	0.8505079825834543	0.9071207430340557	0.9076198279393691	0.09238017206063087	0.4256908140403286	0.8108108108108109	0.5582761998041137
310	1.0	0.0	1.0	1.0	1.0	0.8447606727037517	0.15523932729624834	0.9718076285240465	0.8505079825834543	0.9071207430340557	0.9076198279393691	0.09238017206063087	0.4256908140403286	0.8108108108108109	0.5582761998041137
310	1.0	0.0	1.0	1.0	1.0	0.8447606727037517	0.15523932729624834	0.9718076285240465	0.8505079825834543	0.9071207430340557	0.9076198279393691	0.09238017206063087	0.4256908140403286	0.8108108108108109	0.5582761998041137
310	1.0	0.0	1.0	1.0	1.0	0.8447606727037517	0.15523932729624834	0.9718076285240465	0.8505079825834543	0.9071207430340557	0.9076198279393691	0.09238017206063087	0.4256908140403286	0.8108108108108109	0.5582761998041137
310	1.0	0.0	1.0	1.0	1.0	0.8447606727037517	0.15523932729624834	0.9718076285240465	0.8505079825834543	0.9071207430340557	0.9076198279393691	0.09238017206063087	0.4256908140403286	0.8108108108108109	0.5582761998041137
310	1.0	0.0	1.0	1.0	1.0	0.8447606727037517	0.15523932729624834	0.9718076285240465	0.8505079825834543	0.9071207430340557	0.9076198279393691	0.09238017206063087	0.4256908140403286	0.8108108108108109	0.5582761998041137
310	1.0	0.0	1.0	1.0	1.0	0.8447606727037517	0.15523932729624834	0.9718076285240465	0.8505079825834543	0.9071207430340557	0.9076198279393691	0.09238017206063087	0.4256908140403286	0.8108108108108109	0.5582761998041137
310	1.0	0.0	1.0	1.0	1.0	0.8447606727037517	0.15523932729624834	0.9718076285240465	0.8505079825834543	0.9071207430340557	0.9076198279393691	0.09238017206063087	0.4256908140403286	0.8108108108108109	0.5582761998041137
310	1.0	0.0	1.0	1.0	1.0	0.8447606727037517	0.15523932729624834	0.9718076285240465	0.8505079825834543	0.9071207430340557	0.9076198279393691	0.09238017206063087	0.4256908140403286	0.8108108108108109	0.5582761998041137
310	1.0	0.0	1.0	1.0	1.0	0.8447606727037517	0.15523932729624834	0.9718076285240465	0.8505079825834543	0.9071207430340557	0.9076198279393691	0.09238017206063087	0.4256908140403286	0.8108108108108109	0.5582761998041137
310	1.0	0.0	1.0	1.0	1.0	0.8447606727037517	0.15523932729624834	0.9718076285240465	0.8505079825834543	0.9071207430340557	0.9076198279393691	0.09238017206063087	0.4256908140403286	0.8108108108108109	0.5582761998041137
310	1.0	0.0	1.0	1.0	1.0	0.8447606727037517	0.15523932729624834	0.9718076285240465	0.8505079825834543	0.9071207430340557	0.9076198279393691	0.09238017206063087	0.4256908140403286	0.8108108108108109	0.5582761998041137
310	1.0	0.0	1.0	1.0	1.0	0.8447606727037517	0.15523932729624834	0.9718076285240465	0.8505079825834543	0.9071207430340557	0.9076198279393691	0.09238017206063087	0.4256908140403286	0.8108108108108109	0.5582761998041137
310	1.0	0.0	1.0	1.0	1.0	0.8447606727037517	0.15523932729624834	0.9718076285240465	0.8505079825834543	0.9071207430340557	0.9076198279393691	0.09238017206063087	0.4256908140403286	0.8108108108108109	0.5582761998041137
310	1.0	0.0	1.0	1.0	1.0	0.8447606727037517	0.15523932729624834	0.9718076285240465	0.8505079825834543	0.9071207430340557	0.9076198279393691	0.09238017206063087	0.4256908140403286	0.8108108108108109	0.5582761998041137
310	1.0	0.0	1.0	1.0	1.0	0.8447606727037517	0.15523932729624834	0.9718076285240465	0.8505079825834543	0.9071207430340557	0.9076198279393691	0.09238017206063087	0.4256908140403286	0.8108108108108109	0.5582761998041137
310	1.0	0.0	1.0	1.0	1.0	0.8447606727037517	0.15523932729624834	0.9718076285240465	0.8505079825834543	0.9071207430340557	0.9076198279393691	0.09238017206063087	0.4256908140403286	0.8108108108108109	0.5582761998041137
310	1.0	0.0	1.0	1.0	1.0	0.8447606727037517	0.15523932729624834	0.9718076285240465	0.8505079825834543	0.9071207430340557	0.9076198279393691	0.09238017206063087	0.4256908140403286	0.8108108108108109	0.5582761998041137
310	1.0	0.0	1.0	1.0	1.0	0.8447606727037517	0.15523932729624834	0.9718076285240465	0.8505079825834543	0.9071207430340557	0.9076198279393691	0.09238017206063087	0.4256908140403286	0.8108108108108109	0.5582761998041137
310	1.0	0.0	1.0	1.0	1.0	0.8447606727037517	0.15523932729624834	0.9718076285240465	0.8505079825834543	0.9071207430340557	0.9076198279393691	0.09238017206063087	0.4256908140403286	0.8108108108108109	0.5582761998041137
310	1.0	0.0	1.0	1.0	1.0	0.8447606727037517	0.15523932729624834	0.9718076285240465	0.8505079825834543	0.9071207430340557	0.9076198279393691	0.09238017206063087	0.4256908140403286	0.8108108108108109	0.5582761998041137
310	1.0	0.0	1.0	1.0	1.0	0.8447606727037517	0.15523932729624834	0.9718076285240465	0.8505079825834543	0.9071207430340557	0.9076198279393691	0.09238017206063087	0.4256908140403286	0.8108108108108109	0.5582761998041137
310	1.0	0.0	1.0	1.0	1.0	0.8480519480519481	0.15194805194805194	0.9798657718120806	0.8476052249637155	0.9089494163424124	0.9091095189355168	0.09089048106448316	0.43116490166414523	0.8073654390934845	0.562130177514793
310	1.0	0.0	1.0	1.0	1.0	0.8480519480519481	0.15194805194805194	0.9798657718120806	0.8476052249637155	0.9089494163424124	0.9091095189355168	0.09089048106448316	0.43116490166414523	0.8073654390934845	0.562130177514793
310	1.0	0.0	1.0	1.0	1.0	0.8480519480519481	0.15194805194805194	0.9798657718120806	0.8476052249637155	0.9089494163424124	0.9091095189355168	0.09089048106448316	0.43116490166414523	0.8073654390934845	0.562130177514793
310	1.0	0.0	1.0	1.0	1.0	0.8480519480519481	0.15194805194805194	0.9798657718120806	0.8476052249637155	0.9089494163424124	0.9091095189355168	0.09089048106448316	0.43116490166414523	0.8073654390934845	0.562130177514793
357	1.0	0.0	1.0	1.0	1.0	0.8210382513661202	0.1789617486338798	0.9354304635761589	0.8599695585996956	0.8961141950832673	0.909740657545436	0.09025934245456402	0.44550408719346046	0.9033149171270718	0.5967153284671532
357	1.0	0.0	1.0	1.0	1.0	0.8210382513661202	0.1789617486338798	0.9354304635761589	0.8599695585996956	0.8961141950832673	0.909740657545436	0.09025934245456402	0.44550408719346046	0.9033149171270718	0.5967153284671532
357	1.0	0.0	1.0	1.0	1.0	0.8210382513661202	0.1789617486338798	0.9354304635761589	0.8599695585996956	0.8961141950832673	0.909740657545436	0.09025934245456402	0.44550408719346046	0.9033149171270718	0.5967153284671532
357	1.0	0.0	1.0	1.0	1.0	0.8210382513661202	0.1789617486338798	0.9354304635761589	0.8599695585996956	0.8961141950832673	0.909740657545436	0.09025934245456402	0.44550408719346046	0.9033149171270718	0.5967153284671532
357	1.0	0.0	1.0	1.0	1.0	0.8210382513661202	0.1789617486338798	0.9354304635761589	0.8599695585996956	0.8961141950832673	0.909740657545436	0.09025934245456402	0.44550408719346046	0.9033149171270718	0.5967153284671532
357	1.0	0.0	1.0	1.0	1.0	0.8210382513661202	0.1789617486338798	0.9354304635761589	0.8599695585996956	0.8961141950832673	0.909740657545436	0.09025934245456402	0.44550408719346046	0.9033149171270718	0.5967153284671532
357	1.0	0.0	1.0	1.0	1.0	0.8210382513661202	0.1789617486338798	0.9354304635761589	0.8599695585996956	0.8961141950832673	0.909740657545436	0.09025934245456402	0.44550408719346046	0.9033149171270718	0.5967153284671532
357	1.0	0.0	1.0	1.0	1.0	0.8210382513661202	0.1789617486338798	0.9354304635761589	0.8599695585996956	0.8961141950832673	0.909740657545436	0.09025934245456402	0.44550408719346046	0.9033149171270718	0.5967153284671532
357	1.0	0.0	1.0	1.0	1.0	0.8210382513661202	0.1789617486338798	0.9354304635761589	0.8599695585996956	0.8961141950832673	0.909740657545436	0.09025934245456402	0.44550408719346046	0.9033149171270718	0.5967153284671532
357	1.0	0.0	1.0	1.0	1.0	0.8210382513661202	0.1789617486338798	0.9354304635761589	0.8599695585996956	0.8961141950832673	0.909740657545436	0.09025934245456402	0.44550408719346046	0.9033149171270718	0.5967153284671532
357	1.0	0.0	1.0	1.0	1.0	0.8210382513661202	0.1789617486338798	0.9354304635761589	0.8599695585996956	0.8961141950832673	0.909740657545436	0.09025934245456402	0.44550408719346046	0.9033149171270718	0.5967153284671532
357	1.0	0.0	1.0	1.0	1.0	0.8210382513661202	0.1789617486338798	0.9354304635761589	0.8599695585996956	0.8961141950832673	0.909740657545436	0.09025934245456402	0.44550408719346046	0.9033149171270718	0.5967153284671532
357	1.0	0.0	1.0	1.0	1.0	0.8210382513661202	0.1789617486338798	0.9354304635761589	0.8599695585996956	0.8961141950832673	0.909740657545436	0.09025934245456402	0.44550408719346046	0.9033149171270718	0.5967153284671532
357	1.0	0.0	1.0	1.0	1.0	0.8210382513661202	0.1789617486338798	0.9354304635761589	0.8599695585996956	0.8961141950832673	0.909740657545436	0.09025934245456402	0.44550408719346046	0.9033149171270718	0.5967153284671532
357	1.0	0.0	1.0	1.0	1.0	0.8210382513661202	0.1789617486338798	0.9354304635761589	0.8599695585996956	0.8961141950832673	0.909740657545436	0.09025934245456402	0.44550408719346046	0.9033149171270718	0.5967153284671532
357	1.0	0.0	1.0	1.0	1.0	0.8210382513661202	0.1789617486338798	0.9354304635761589	0.8599695585996956	0.8961141950832673	0.909740657545436	0.09025934245456402	0.44550408719346046	0.9033149171270718	0.5967153284671532
357	1.0	0.0	1.0	1.0	1.0	0.8210382513661202	0.1789617486338798	0.9354304635761589	0.8599695585996956	0.8961141950832673	0.909740657545436	0.09025934245456402	0.44550408719346046	0.9033149171270718	0.5967153284671532
357	1.0	0.0	1.0	1.0	1.0	0.8210382513661202	0.1789617486338798	0.9354304635761589	0.8599695585996956	0.8961141950832673	0.909740657545436	0.09025934245456402	0.44550408719346046	0.9033149171270718	0.5967153284671532
357	1.0	0.0	1.0	1.0	1.0	0.8210382513661202	0.1789617486338798	0.9354304635761589	0.8599695585996956	0.8961141950832673	0.909740657545436	0.09025934245456402	0.44550408719346046	0.9033149171270718	0.5967153284671532
357	1.0	0.0	1.0	1.0	1.0	0.8210382513661202	0.1789617486338798	0.9354304635761589	0.8599695585996956	0.8961141950832673	0.909740657545436	0.09025934245456402	0.44550408719346046	0.9033149171270718	0.5967153284671532
357	1.0	0.0	1.0	1.0	1.0	0.8210382513661202	0.1789617486338798	0.9354304635761589	0.8599695585996956	0.8961141950832673	0.909740657545436	0.09025934245456402	0.44550408719346046	0.9033149171270718	0.5967153284671532
357	1.0	0.0	1.0	1.0	1.0	0.8210382513661202	0.1789617486338798	0.9354304635761589	0.8599695585996956	0.8961141950832673	0.909740657545436	0.09025934245456402	0.44550408719346046	0.9033149171270718	0.5967153284671532
357	1.0	0.0	1.0	1.0	1.0	0.8210382513661202	0.1789617486338798	0.9354304635761589	0.8599695585996956	0.8961141950832673	0.909740657545436	0.09025934245456402	0.44550408719346046	0.9033149171270718	0.5967153284671532
357	1.0	0.0	1.0	1.0	1.0	0.8210382513661202	0.1789617486338798	0.9354304635761589	0.8599695585996956	0.8961141950832673	0.909740657545436	0.09025934245456402	0.44550408719346046	0.9033149171270718	0.5967153284671532
357	1.0	0.0	1.0	1.0	1.0	0.8210382513661202	0.1789617486338798	0.9354304635761589	0.8599695585996956	0.8961141950832673	0.909740657545436	0.09025934245456402	0.44550408719346046	0.9033149171270718	0.5967153284671532
357	1.0	0.0	1.0	1.0	1.0	0.8210382513661202	0.1789617486338798	0.9354304635761589	0.8599695585996956	0.8961141950832673	0.909740657545436	0.09025934245456402	0.44550408719346046	0.9033149171270718	0.5967153284671532
357	1.0	0.0	1.0	1.0	1.0	0.8210382513661202	0.1789617486338798	0.9354304635761589	0.8599695585996956	0.8961141950832673	0.909740657545436	0.09025934245456402	0.44550408719346046	0.9033149171270718	0.5967153284671532
357	1.0	0.0	1.0	1.0	1.0	0.8210382513661202	0.1789617486338798	0.9354304635761589	0.8599695585996956	0.8961141950832673	0.909740657545436	0.09025934245456402	0.44550408719346046	0.9033149171270718	0.5967153284671532
349	1.0	0.0	1.0	1.0	1.0	0.8249299719887955	0.17507002801120453	0.9836065573770492	0.823170731707317	0.8962655601659751	0.9230612660289029	0.07693873397109707	0.49372693726937267	0.9052774018944519	0.6389684813753581
349	1.0	0.0	1.0	1.0	1.0	0.8249299719887955	0.17507002801120453	0.9836065573770492	0.823170731707317	0.8962655601659751	0.9230612660289029	0.07693873397109707	0.49372693726937267	0.9052774018944519	0.6389684813753581
349	1.0	0.0	1.0	1.0	1.0	0.8249299719887955	0.17507002801120453	0.9836065573770492	0.823170731707317	0.8962655601659751	0.9230612660289029	0.07693873397109707	0.49372693726937267	0.9052774018944519	0.6389684813753581
349	1.0	0.0	1.0	1.0	1.0	0.8249299719887955	0.17507002801120453	0.9836065573770492	0.823170731707317	0.8962655601659751	0.9230612660289029	0.07693873397109707	0.49372693726937267	0.9052774018944519	0.6389684813753581
349	1.0	0.0	1.0	1.0	1.0	0.8249299719887955	0.17507002801120453	0.9836065573770492	0.823170731707317	0.8962655601659751	0.9230612660289029	0.07693873397109707	0.49372693726937267	0.9052774018944519	0.6389684813753581
349	1.0	0.0	1.0	1.0	1.0	0.8249299719887955	0.17507002801120453	0.9836065573770492	0.823170731707317	0.8962655601659751	0.9230612660289029	0.07693873397109707	0.49372693726937267	0.9052774018944519	0.6389684813753581
349	1.0	0.0	1.0	1.0	1.0	0.8249299719887955	0.17507002801120453	0.9836065573770492	0.823170731707317	0.8962655601659751	0.9230612660289029	0.07693873397109707	0.49372693726937267	0.9052774018944519	0.6389684813753581
349	1.0	0.0	1.0	1.0	1.0	0.8249299719887955	0.17507002801120453	0.9836065573770492	0.823170731707317	0.8962655601659751	0.9230612660289029	0.07693873397109707	0.49372693726937267	0.9052774018944519	0.6389684813753581
349	1.0	0.0	1.0	1.0	1.0	0.8249299719887955	0.17507002801120453	0.9836065573770492	0.823170731707317	0.8962655601659751	0.9230612660289029	0.07693873397109707	0.49372693726937267	0.9052774018944519	0.6389684813753581
349	1.0	0.0	1.0	1.0	1.0	0.8249299719887955	0.17507002801120453	0.9836065573770492	0.823170731707317	0.8962655601659751	0.9230612660289029	0.07693873397109707	0.49372693726937267	0.9052774018944519	0.6389684813753581
349	1.0	0.0	1.0	1.0	1.0	0.8272108843537415	0.17278911564625854	0.9801801801801802	0.8242424242424242	0.8954732510288066	0.9236104028556859	0.07638959714431415	0.4947994056463596	0.9061224489795918	0.640076886112446
349	1.0	0.0	1.0	1.0	1.0	0.8272108843537415	0.17278911564625854	0.9801801801801802	0.8242424242424242	0.8954732510288066	0.9236104028556859	0.07638959714431415	0.4947994056463596	0.9061224489795918	0.640076886112446
349	1.0	0.0	1.0	1.0	1.0	0.8272108843537415	0.17278911564625854	0.9801801801801802	0.8242424242424242	0.8954732510288066	0.9236104028556859	0.07638959714431415	0.4947994056463596	0.9061224489795918	0.640076886112446
349	1.0	0.0	1.0	1.0	1.0	0.8272108843537415	0.17278911564625854	0.9801801801801802	0.8242424242424242	0.8954732510288066	0.9236104028556859	0.07638959714431415	0.4947994056463596	0.9061224489795918	0.640076886112446
349	1.0	0.0	1.0	1.0	1.0	0.8272108843537415	0.17278911564625854	0.9801801801801802	0.8242424242424242	0.8954732510288066	0.9236104028556859	0.07638959714431415	0.4947994056463596	0.9061224489795918	0.640076886112446
349	1.0	0.0	1.0	1.0	1.0	0.8275862068965517	0.1724137931034483	0.9818181818181818	0.8244274809160306	0.896265560165975	0.9241976566479878	0.07580234335201219	0.49851190476190477	0.9054054054054054	0.6429942418426103
349	1.0	0.0	1.0	1.0	1.0	0.8275862068965517	0.1724137931034483	0.9818181818181818	0.8244274809160306	0.896265560165975	0.9241976566479878	0.07580234335201219	0.49851190476190477	0.9054054054054054	0.6429942418426103
349	1.0	0.0	1.0	1.0	1.0	0.8275862068965517	0.1724137931034483	0.9818181818181818	0.8244274809160306	0.896265560165975	0.9241976566479878	0.07580234335201219	0.49851190476190477	0.9054054054054054	0.6429942418426103
349	1.0	0.0	1.0	1.0	1.0	0.8275862068965517	0.1724137931034483	0.9818181818181818	0.8244274809160306	0.896265560165975	0.9241976566479878	0.07580234335201219	0.49851190476190477	0.9054054054054054	0.6429942418426103
349	1.0	0.0	1.0	1.0	1.0	0.8275862068965517	0.1724137931034483	0.9818181818181818	0.8244274809160306	0.896265560165975	0.9241976566479878	0.07580234335201219	0.49851190476190477	0.9054054054054054	0.6429942418426103
349	1.0	0.0	1.0	1.0	1.0	0.8275862068965517	0.1724137931034483	0.9818181818181818	0.8244274809160306	0.896265560165975	0.9241976566479878	0.07580234335201219	0.49851190476190477	0.9054054054054054	0.6429942418426103
349	1.0	0.0	1.0	1.0	1.0	0.8275862068965517	0.1724137931034483	0.9818181818181818	0.8244274809160306	0.896265560165975	0.9241976566479878	0.07580234335201219	0.49851190476190477	0.9054054054054054	0.6429942418426103
349	1.0	0.0	1.0	1.0	1.0	0.8275862068965517	0.1724137931034483	0.9818181818181818	0.8244274809160306	0.896265560165975	0.9241976566479878	0.07580234335201219	0.49851190476190477	0.9054054054054054	0.6429942418426103
349	1.0	0.0	1.0	1.0	1.0	0.8275862068965517	0.1724137931034483	0.9818181818181818	0.8244274809160306	0.896265560165975	0.9241976566479878	0.07580234335201219	0.49851190476190477	0.9054054054054054	0.6429942418426103
349	1.0	0.0	1.0	1.0	1.0	0.8275862068965517	0.1724137931034483	0.9818181818181818	0.8244274809160306	0.896265560165975	0.9241976566479878	0.07580234335201219	0.49851190476190477	0.9054054054054054	0.6429942418426103
349	1.0	0.0	1.0	1.0	1.0	0.8275862068965517	0.1724137931034483	0.9818181818181818	0.8244274809160306	0.896265560165975	0.9241976566479878	0.07580234335201219	0.49851190476190477	0.9054054054054054	0.6429942418426103
349	1.0	0.0	1.0	1.0	1.0	0.8275862068965517	0.1724137931034483	0.9818181818181818	0.8244274809160306	0.896265560165975	0.9241976566479878	0.07580234335201219	0.49851190476190477	0.9054054054054054	0.6429942418426103
349	1.0	0.0	1.0	1.0	1.0	0.8275862068965517	0.1724137931034483	0.9818181818181818	0.8244274809160306	0.896265560165975	0.9241976566479878	0.07580234335201219	0.49851190476190477	0.9054054054054054	0.6429942418426103
349	1.0	0.0	1.0	1.0	1.0	0.8275862068965517	0.1724137931034483	0.9818181818181818	0.8244274809160306	0.896265560165975	0.9241976566479878	0.07580234335201219	0.49851190476190477	0.9054054054054054	0.6429942418426103
349	1.0	0.0	1.0	1.0	1.0	0.8275862068965517	0.1724137931034483	0.9818181818181818	0.8244274809160306	0.896265560165975	0.9241976566479878	0.07580234335201219	0.49851190476190477	0.9054054054054054	0.6429942418426103
349	1.0	0.0	1.0	1.0	1.0	0.8275862068965517	0.1724137931034483	0.9818181818181818	0.8244274809160306	0.896265560165975	0.9241976566479878	0.07580234335201219	0.49851190476190477	0.9054054054054054	0.6429942418426103
349	1.0	0.0	1.0	1.0	1.0	0.8275862068965517	0.1724137931034483	0.9818181818181818	0.8244274809160306	0.896265560165975	0.9241976566479878	0.07580234335201219	0.49851190476190477	0.9054054054054054	0.6429942418426103
349	1.0	0.0	1.0	1.0	1.0	0.8275862068965517	0.1724137931034483	0.9818181818181818	0.8244274809160306	0.896265560165975	0.9241976566479878	0.07580234335201219	0.49851190476190477	0.9054054054054054	0.6429942418426103
349	1.0	0.0	1.0	1.0	1.0	0.8275862068965517	0.1724137931034483	0.9818181818181818	0.8244274809160306	0.896265560165975	0.9241976566479878	0.07580234335201219	0.49851190476190477	0.9054054054054054	0.6429942418426103
349	1.0	0.0	1.0	1.0	1.0	0.8275862068965517	0.1724137931034483	0.9818181818181818	0.8244274809160306	0.896265560165975	0.9241976566479878	0.07580234335201219	0.49851190476190477	0.9054054054054054	0.6429942418426103
349	1.0	0.0	1.0	1.0	1.0	0.8275862068965517	0.1724137931034483	0.9818181818181818	0.8244274809160306	0.896265560165975	0.9241976566479878	0.07580234335201219	0.49851190476190477	0.9054054054054054	0.6429942418426103
349	1.0	0.0	1.0	1.0	1.0	0.8275862068965517	0.1724137931034483	0.9818181818181818	0.8244274809160306	0.896265560165975	0.9241976566479878	0.07580234335201219	0.49851190476190477	0.9054054054054054	0.6429942418426103
349	1.0	0.0	1.0	1.0	1.0	0.8275862068965517	0.1724137931034483	0.9818181818181818	0.8244274809160306	0.896265560165975	0.9241976566479878	0.07580234335201219	0.49851190476190477	0.9054054054054054	0.6429942418426103
349	1.0	0.0	1.0	1.0	1.0	0.8275862068965517	0.1724137931034483	0.9818181818181818	0.8244274809160306	0.896265560165975	0.9241976566479878	0.07580234335201219	0.49851190476190477	0.9054054054054054	0.6429942418426103
