# Supplementary material for: An Improved Hybrid Feature Selection Algorithm for Electric Charge Recovery Risk
Source: Hindawi journal article supplement (doi:10.1155/2020/8479341), 2020-08-28
Supplement: f1 [file 8479341.f1.zip › 8479341.f1/Experimental Results/201806/BGA_SBS_results.csv]

features_num	Accuracy_high	Loss_high	Precission_high	Recall_high	F1_high	Accuracy_med	Loss_med	Precission_med	Recall_med	F1_med	Accuracy_low	Loss_low	Precission_low	Recall_low	F1_low
349	1	0	1	1	1	0.807930607	0.192069393	0.948160535	0.820549928	0.879751746	0.918749357	0.081250643	0.465714286	0.939481268	0.622731614
348	1	0	1	1	1	0.815926893	0.184073107	0.969911504	0.81547619	0.886014551	0.923250102	0.076749898	0.489187174	0.909847434	0.636275461
347	1	0	1	1	1	0.825627477	0.174372523	0.978533095	0.820089955	0.89233279	0.924358581	0.075641419	0.495502249	0.907967033	0.641125121
347	1	0	1	1	1	0.825627477	0.174372523	0.978533095	0.820089955	0.89233279	0.924358581	0.075641419	0.495502249	0.907967033	0.641125121
346	1	0	1	1	1	0.829411765	0.170588235	0.986891386	0.828616352	0.900854701	0.92474645	0.07525355	0.506263817	0.90513834	0.649338374
346	1	0	1	1	1	0.829411765	0.170588235	0.986891386	0.828616352	0.900854701	0.92474645	0.07525355	0.506263817	0.90513834	0.649338374
346	1	0	1	1	1	0.829411765	0.170588235	0.986891386	0.828616352	0.900854701	0.92474645	0.07525355	0.506263817	0.90513834	0.649338374
346	1	0	1	1	1	0.829411765	0.170588235	0.986891386	0.828616352	0.900854701	0.92474645	0.07525355	0.506263817	0.90513834	0.649338374
346	1	0	1	1	1	0.829411765	0.170588235	0.986891386	0.828616352	0.900854701	0.92474645	0.07525355	0.506263817	0.90513834	0.649338374
346	1	0	1	1	1	0.829411765	0.170588235	0.986891386	0.828616352	0.900854701	0.92474645	0.07525355	0.506263817	0.90513834	0.649338374
346	1	0	1	1	1	0.829411765	0.170588235	0.986891386	0.828616352	0.900854701	0.92474645	0.07525355	0.506263817	0.90513834	0.649338374
346	1	0	1	1	1	0.829411765	0.170588235	0.986891386	0.828616352	0.900854701	0.92474645	0.07525355	0.506263817	0.90513834	0.649338374
346	1	0	1	1	1	0.829411765	0.170588235	0.986891386	0.828616352	0.900854701	0.92474645	0.07525355	0.506263817	0.90513834	0.649338374
346	1	0	1	1	1	0.829411765	0.170588235	0.986891386	0.828616352	0.900854701	0.92474645	0.07525355	0.506263817	0.90513834	0.649338374
346	1	0	1	1	1	0.829411765	0.170588235	0.986891386	0.828616352	0.900854701	0.92474645	0.07525355	0.506263817	0.90513834	0.649338374
346	1	0	1	1	1	0.829411765	0.170588235	0.986891386	0.828616352	0.900854701	0.92474645	0.07525355	0.506263817	0.90513834	0.649338374
346	1	0	1	1	1	0.829411765	0.170588235	0.986891386	0.828616352	0.900854701	0.92474645	0.07525355	0.506263817	0.90513834	0.649338374
346	1	0	1	1	1	0.829411765	0.170588235	0.986891386	0.828616352	0.900854701	0.92474645	0.07525355	0.506263817	0.90513834	0.649338374
346	1	0	1	1	1	0.829411765	0.170588235	0.986891386	0.828616352	0.900854701	0.92474645	0.07525355	0.506263817	0.90513834	0.649338374
346	1	0	1	1	1	0.829411765	0.170588235	0.986891386	0.828616352	0.900854701	0.92474645	0.07525355	0.506263817	0.90513834	0.649338374
346	1	0	1	1	1	0.829411765	0.170588235	0.986891386	0.828616352	0.900854701	0.92474645	0.07525355	0.506263817	0.90513834	0.649338374
346	1	0	1	1	1	0.829411765	0.170588235	0.986891386	0.828616352	0.900854701	0.92474645	0.07525355	0.506263817	0.90513834	0.649338374
346	1	0	1	1	1	0.829411765	0.170588235	0.986891386	0.828616352	0.900854701	0.92474645	0.07525355	0.506263817	0.90513834	0.649338374
346	1	0	1	1	1	0.829411765	0.170588235	0.986891386	0.828616352	0.900854701	0.92474645	0.07525355	0.506263817	0.90513834	0.649338374
346	1	0	1	1	1	0.829411765	0.170588235	0.986891386	0.828616352	0.900854701	0.92474645	0.07525355	0.506263817	0.90513834	0.649338374
346	1	0	1	1	1	0.829411765	0.170588235	0.986891386	0.828616352	0.900854701	0.92474645	0.07525355	0.506263817	0.90513834	0.649338374
346	1	0	1	1	1	0.829411765	0.170588235	0.986891386	0.828616352	0.900854701	0.92474645	0.07525355	0.506263817	0.90513834	0.649338374
346	1	0	1	1	1	0.829411765	0.170588235	0.986891386	0.828616352	0.900854701	0.92474645	0.07525355	0.506263817	0.90513834	0.649338374
346	1	0	1	1	1	0.829411765	0.170588235	0.986891386	0.828616352	0.900854701	0.92474645	0.07525355	0.506263817	0.90513834	0.649338374
346	1	0	1	1	1	0.829411765	0.170588235	0.986891386	0.828616352	0.900854701	0.92474645	0.07525355	0.506263817	0.90513834	0.649338374
346	1	0	1	1	1	0.829411765	0.170588235	0.986891386	0.828616352	0.900854701	0.92474645	0.07525355	0.506263817	0.90513834	0.649338374
346	1	0	1	1	1	0.829411765	0.170588235	0.986891386	0.828616352	0.900854701	0.92474645	0.07525355	0.506263817	0.90513834	0.649338374
346	1	0	1	1	1	0.829411765	0.170588235	0.986891386	0.828616352	0.900854701	0.92474645	0.07525355	0.506263817	0.90513834	0.649338374
346	1	0	1	1	1	0.829411765	0.170588235	0.986891386	0.828616352	0.900854701	0.92474645	0.07525355	0.506263817	0.90513834	0.649338374
346	1	0	1	1	1	0.829411765	0.170588235	0.986891386	0.828616352	0.900854701	0.92474645	0.07525355	0.506263817	0.90513834	0.649338374
346	1	0	1	1	1	0.829411765	0.170588235	0.986891386	0.828616352	0.900854701	0.92474645	0.07525355	0.506263817	0.90513834	0.649338374
346	1	0	1	1	1	0.829411765	0.170588235	0.986891386	0.828616352	0.900854701	0.92474645	0.07525355	0.506263817	0.90513834	0.649338374
346	1	0	1	1	1	0.829411765	0.170588235	0.986891386	0.828616352	0.900854701	0.92474645	0.07525355	0.506263817	0.90513834	0.649338374
346	1	0	1	1	1	0.829411765	0.170588235	0.986891386	0.828616352	0.900854701	0.92474645	0.07525355	0.506263817	0.90513834	0.649338374
346	1	0	1	1	1	0.829411765	0.170588235	0.986891386	0.828616352	0.900854701	0.92474645	0.07525355	0.506263817	0.90513834	0.649338374
346	1	0	1	1	1	0.829411765	0.170588235	0.986891386	0.828616352	0.900854701	0.92474645	0.07525355	0.506263817	0.90513834	0.649338374
346	1	0	1	1	1	0.829411765	0.170588235	0.986891386	0.828616352	0.900854701	0.92474645	0.07525355	0.506263817	0.90513834	0.649338374
346	1	0	1	1	1	0.829411765	0.170588235	0.986891386	0.828616352	0.900854701	0.92474645	0.07525355	0.506263817	0.90513834	0.649338374
346	1	0	1	1	1	0.829411765	0.170588235	0.986891386	0.828616352	0.900854701	0.92474645	0.07525355	0.506263817	0.90513834	0.649338374
346	1	0	1	1	1	0.829411765	0.170588235	0.986891386	0.828616352	0.900854701	0.92474645	0.07525355	0.506263817	0.90513834	0.649338374
346	1	0	1	1	1	0.829411765	0.170588235	0.986891386	0.828616352	0.900854701	0.92474645	0.07525355	0.506263817	0.90513834	0.649338374
346	1	0	1	1	1	0.829411765	0.170588235	0.986891386	0.828616352	0.900854701	0.92474645	0.07525355	0.506263817	0.90513834	0.649338374
346	1	0	1	1	1	0.829411765	0.170588235	0.986891386	0.828616352	0.900854701	0.92474645	0.07525355	0.506263817	0.90513834	0.649338374
346	1	0	1	1	1	0.829411765	0.170588235	0.986891386	0.828616352	0.900854701	0.92474645	0.07525355	0.506263817	0.90513834	0.649338374
346	1	0	1	1	1	0.829411765	0.170588235	0.986891386	0.828616352	0.900854701	0.92474645	0.07525355	0.506263817	0.90513834	0.649338374
346	1	0	1	1	1	0.829411765	0.170588235	0.986891386	0.828616352	0.900854701	0.92474645	0.07525355	0.506263817	0.90513834	0.649338374
346	1	0	1	1	1	0.829411765	0.170588235	0.986891386	0.828616352	0.900854701	0.92474645	0.07525355	0.506263817	0.90513834	0.649338374
346	1	0	1	1	1	0.829411765	0.170588235	0.986891386	0.828616352	0.900854701	0.92474645	0.07525355	0.506263817	0.90513834	0.649338374
346	1	0	1	1	1	0.829411765	0.170588235	0.986891386	0.828616352	0.900854701	0.92474645	0.07525355	0.506263817	0.90513834	0.649338374
346	1	0	1	1	1	0.829411765	0.170588235	0.986891386	0.828616352	0.900854701	0.92474645	0.07525355	0.506263817	0.90513834	0.649338374
346	1	0	1	1	1	0.829411765	0.170588235	0.986891386	0.828616352	0.900854701	0.92474645	0.07525355	0.506263817	0.90513834	0.649338374
346	1	0	1	1	1	0.829411765	0.170588235	0.986891386	0.828616352	0.900854701	0.92474645	0.07525355	0.506263817	0.90513834	0.649338374
346	1	0	1	1	1	0.829411765	0.170588235	0.986891386	0.828616352	0.900854701	0.92474645	0.07525355	0.506263817	0.90513834	0.649338374
346	1	0	1	1	1	0.829411765	0.170588235	0.986891386	0.828616352	0.900854701	0.92474645	0.07525355	0.506263817	0.90513834	0.649338374
346	1	0	1	1	1	0.829411765	0.170588235	0.986891386	0.828616352	0.900854701	0.92474645	0.07525355	0.506263817	0.90513834	0.649338374
346	1	0	1	1	1	0.829411765	0.170588235	0.986891386	0.828616352	0.900854701	0.92474645	0.07525355	0.506263817	0.90513834	0.649338374
346	1	0	1	1	1	0.829411765	0.170588235	0.986891386	0.828616352	0.900854701	0.92474645	0.07525355	0.506263817	0.90513834	0.649338374
346	1	0	1	1	1	0.829411765	0.170588235	0.986891386	0.828616352	0.900854701	0.92474645	0.07525355	0.506263817	0.90513834	0.649338374
346	1	0	1	1	1	0.829411765	0.170588235	0.986891386	0.828616352	0.900854701	0.92474645	0.07525355	0.506263817	0.90513834	0.649338374
346	1	0	1	1	1	0.829411765	0.170588235	0.986891386	0.828616352	0.900854701	0.92474645	0.07525355	0.506263817	0.90513834	0.649338374
346	1	0	1	1	1	0.829411765	0.170588235	0.986891386	0.828616352	0.900854701	0.92474645	0.07525355	0.506263817	0.90513834	0.649338374
346	1	0	1	1	1	0.829411765	0.170588235	0.986891386	0.828616352	0.900854701	0.92474645	0.07525355	0.506263817	0.90513834	0.649338374
346	1	0	1	1	1	0.829411765	0.170588235	0.986891386	0.828616352	0.900854701	0.92474645	0.07525355	0.506263817	0.90513834	0.649338374
346	1	0	1	1	1	0.829411765	0.170588235	0.986891386	0.828616352	0.900854701	0.92474645	0.07525355	0.506263817	0.90513834	0.649338374
346	1	0	1	1	1	0.829411765	0.170588235	0.986891386	0.828616352	0.900854701	0.92474645	0.07525355	0.506263817	0.90513834	0.649338374
346	1	0	1	1	1	0.829411765	0.170588235	0.986891386	0.828616352	0.900854701	0.92474645	0.07525355	0.506263817	0.90513834	0.649338374
346	1	0	1	1	1	0.829411765	0.170588235	0.986891386	0.828616352	0.900854701	0.92474645	0.07525355	0.506263817	0.90513834	0.649338374
346	1	0	1	1	1	0.829411765	0.170588235	0.986891386	0.828616352	0.900854701	0.92474645	0.07525355	0.506263817	0.90513834	0.649338374
346	1	0	1	1	1	0.829411765	0.170588235	0.986891386	0.828616352	0.900854701	0.92474645	0.07525355	0.506263817	0.90513834	0.649338374
346	1	0	1	1	1	0.829411765	0.170588235	0.986891386	0.828616352	0.900854701	0.92474645	0.07525355	0.506263817	0.90513834	0.649338374
346	1	0	1	1	1	0.829411765	0.170588235	0.986891386	0.828616352	0.900854701	0.92474645	0.07525355	0.506263817	0.90513834	0.649338374
346	1	0	1	1	1	0.829411765	0.170588235	0.986891386	0.828616352	0.900854701	0.92474645	0.07525355	0.506263817	0.90513834	0.649338374
346	1	0	1	1	1	0.829411765	0.170588235	0.986891386	0.828616352	0.900854701	0.92474645	0.07525355	0.506263817	0.90513834	0.649338374
346	1	0	1	1	1	0.829411765	0.170588235	0.986891386	0.828616352	0.900854701	0.92474645	0.07525355	0.506263817	0.90513834	0.649338374
346	1	0	1	1	1	0.829411765	0.170588235	0.986891386	0.828616352	0.900854701	0.92474645	0.07525355	0.506263817	0.90513834	0.649338374
346	1	0	1	1	1	0.829411765	0.170588235	0.986891386	0.828616352	0.900854701	0.92474645	0.07525355	0.506263817	0.90513834	0.649338374
346	1	0	1	1	1	0.829411765	0.170588235	0.986891386	0.828616352	0.900854701	0.92474645	0.07525355	0.506263817	0.90513834	0.649338374
346	1	0	1	1	1	0.829411765	0.170588235	0.986891386	0.828616352	0.900854701	0.92474645	0.07525355	0.506263817	0.90513834	0.649338374
346	1	0	1	1	1	0.829411765	0.170588235	0.986891386	0.828616352	0.900854701	0.92474645	0.07525355	0.506263817	0.90513834	0.649338374
346	1	0	1	1	1	0.829411765	0.170588235	0.986891386	0.828616352	0.900854701	0.92474645	0.07525355	0.506263817	0.90513834	0.649338374
346	1	0	1	1	1	0.829411765	0.170588235	0.986891386	0.828616352	0.900854701	0.92474645	0.07525355	0.506263817	0.90513834	0.649338374
346	1	0	1	1	1	0.829411765	0.170588235	0.986891386	0.828616352	0.900854701	0.92474645	0.07525355	0.506263817	0.90513834	0.649338374
346	1	0	1	1	1	0.829411765	0.170588235	0.986891386	0.828616352	0.900854701	0.92474645	0.07525355	0.506263817	0.90513834	0.649338374
346	1	0	1	1	1	0.829411765	0.170588235	0.986891386	0.828616352	0.900854701	0.92474645	0.07525355	0.506263817	0.90513834	0.649338374
346	1	0	1	1	1	0.829411765	0.170588235	0.986891386	0.828616352	0.900854701	0.92474645	0.07525355	0.506263817	0.90513834	0.649338374
346	1	0	1	1	1	0.829411765	0.170588235	0.986891386	0.828616352	0.900854701	0.92474645	0.07525355	0.506263817	0.90513834	0.649338374
346	1	0	1	1	1	0.829411765	0.170588235	0.986891386	0.828616352	0.900854701	0.92474645	0.07525355	0.506263817	0.90513834	0.649338374
346	1	0	1	1	1	0.829411765	0.170588235	0.986891386	0.828616352	0.900854701	0.92474645	0.07525355	0.506263817	0.90513834	0.649338374
346	1	0	1	1	1	0.829411765	0.170588235	0.986891386	0.828616352	0.900854701	0.92474645	0.07525355	0.506263817	0.90513834	0.649338374
346	1	0	1	1	1	0.829411765	0.170588235	0.986891386	0.828616352	0.900854701	0.92474645	0.07525355	0.506263817	0.90513834	0.649338374
346	1	0	1	1	1	0.829411765	0.170588235	0.986891386	0.828616352	0.900854701	0.92474645	0.07525355	0.506263817	0.90513834	0.649338374
346	1	0	1	1	1	0.829411765	0.170588235	0.986891386	0.828616352	0.900854701	0.92474645	0.07525355	0.506263817	0.90513834	0.649338374
346	1	0	1	1	1	0.829411765	0.170588235	0.986891386	0.828616352	0.900854701	0.92474645	0.07525355	0.506263817	0.90513834	0.649338374
346	1	0	1	1	1	0.829411765	0.170588235	0.986891386	0.828616352	0.900854701	0.92474645	0.07525355	0.506263817	0.90513834	0.649338374
346	1	0	1	1	1	0.829411765	0.170588235	0.986891386	0.828616352	0.900854701	0.92474645	0.07525355	0.506263817	0.90513834	0.649338374
346	1	0	1	1	1	0.829411765	0.170588235	0.986891386	0.828616352	0.900854701	0.92474645	0.07525355	0.506263817	0.90513834	0.649338374
346	1	0	1	1	1	0.829411765	0.170588235	0.986891386	0.828616352	0.900854701	0.92474645	0.07525355	0.506263817	0.90513834	0.649338374
346	1	0	1	1	1	0.829411765	0.170588235	0.986891386	0.828616352	0.900854701	0.92474645	0.07525355	0.506263817	0.90513834	0.649338374
346	1	0	1	1	1	0.829411765	0.170588235	0.986891386	0.828616352	0.900854701	0.92474645	0.07525355	0.506263817	0.90513834	0.649338374
346	1	0	1	1	1	0.829411765	0.170588235	0.986891386	0.828616352	0.900854701	0.92474645	0.07525355	0.506263817	0.90513834	0.649338374
346	1	0	1	1	1	0.829411765	0.170588235	0.986891386	0.828616352	0.900854701	0.92474645	0.07525355	0.506263817	0.90513834	0.649338374
346	1	0	1	1	1	0.829411765	0.170588235	0.986891386	0.828616352	0.900854701	0.92474645	0.07525355	0.506263817	0.90513834	0.649338374
346	1	0	1	1	1	0.829411765	0.170588235	0.986891386	0.828616352	0.900854701	0.92474645	0.07525355	0.506263817	0.90513834	0.649338374
346	1	0	1	1	1	0.829411765	0.170588235	0.986891386	0.828616352	0.900854701	0.92474645	0.07525355	0.506263817	0.90513834	0.649338374
346	1	0	1	1	1	0.829411765	0.170588235	0.986891386	0.828616352	0.900854701	0.92474645	0.07525355	0.506263817	0.90513834	0.649338374
346	1	0	1	1	1	0.829411765	0.170588235	0.986891386	0.828616352	0.900854701	0.92474645	0.07525355	0.506263817	0.90513834	0.649338374
346	1	0	1	1	1	0.829411765	0.170588235	0.986891386	0.828616352	0.900854701	0.92474645	0.07525355	0.506263817	0.90513834	0.649338374
346	1	0	1	1	1	0.829411765	0.170588235	0.986891386	0.828616352	0.900854701	0.92474645	0.07525355	0.506263817	0.90513834	0.649338374
346	1	0	1	1	1	0.829411765	0.170588235	0.986891386	0.828616352	0.900854701	0.92474645	0.07525355	0.506263817	0.90513834	0.649338374
346	1	0	1	1	1	0.829411765	0.170588235	0.986891386	0.828616352	0.900854701	0.92474645	0.07525355	0.506263817	0.90513834	0.649338374
346	1	0	1	1	1	0.829411765	0.170588235	0.986891386	0.828616352	0.900854701	0.92474645	0.07525355	0.506263817	0.90513834	0.649338374
346	1	0	1	1	1	0.829411765	0.170588235	0.986891386	0.828616352	0.900854701	0.92474645	0.07525355	0.506263817	0.90513834	0.649338374
346	1	0	1	1	1	0.829411765	0.170588235	0.986891386	0.828616352	0.900854701	0.92474645	0.07525355	0.506263817	0.90513834	0.649338374
346	1	0	1	1	1	0.829411765	0.170588235	0.986891386	0.828616352	0.900854701	0.92474645	0.07525355	0.506263817	0.90513834	0.649338374
346	1	0	1	1	1	0.829411765	0.170588235	0.986891386	0.828616352	0.900854701	0.92474645	0.07525355	0.506263817	0.90513834	0.649338374
346	1	0	1	1	1	0.829411765	0.170588235	0.986891386	0.828616352	0.900854701	0.92474645	0.07525355	0.506263817	0.90513834	0.649338374
346	1	0	1	1	1	0.829411765	0.170588235	0.986891386	0.828616352	0.900854701	0.92474645	0.07525355	0.506263817	0.90513834	0.649338374
346	1	0	1	1	1	0.829411765	0.170588235	0.986891386	0.828616352	0.900854701	0.92474645	0.07525355	0.506263817	0.90513834	0.649338374
346	1	0	1	1	1	0.829411765	0.170588235	0.986891386	0.828616352	0.900854701	0.92474645	0.07525355	0.506263817	0.90513834	0.649338374
346	1	0	1	1	1	0.829411765	0.170588235	0.986891386	0.828616352	0.900854701	0.92474645	0.07525355	0.506263817	0.90513834	0.649338374
346	1	0	1	1	1	0.829411765	0.170588235	0.986891386	0.828616352	0.900854701	0.92474645	0.07525355	0.506263817	0.90513834	0.649338374
346	1	0	1	1	1	0.829411765	0.170588235	0.986891386	0.828616352	0.900854701	0.92474645	0.07525355	0.506263817	0.90513834	0.649338374
346	1	0	1	1	1	0.829411765	0.170588235	0.986891386	0.828616352	0.900854701	0.92474645	0.07525355	0.506263817	0.90513834	0.649338374
346	1	0	1	1	1	0.829411765	0.170588235	0.986891386	0.828616352	0.900854701	0.92474645	0.07525355	0.506263817	0.90513834	0.649338374
346	1	0	1	1	1	0.829411765	0.170588235	0.986891386	0.828616352	0.900854701	0.92474645	0.07525355	0.506263817	0.90513834	0.649338374
346	1	0	1	1	1	0.829411765	0.170588235	0.986891386	0.828616352	0.900854701	0.92474645	0.07525355	0.506263817	0.90513834	0.649338374
346	1	0	1	1	1	0.829411765	0.170588235	0.986891386	0.828616352	0.900854701	0.92474645	0.07525355	0.506263817	0.90513834	0.649338374
346	1	0	1	1	1	0.829411765	0.170588235	0.986891386	0.828616352	0.900854701	0.92474645	0.07525355	0.506263817	0.90513834	0.649338374
346	1	0	1	1	1	0.829411765	0.170588235	0.986891386	0.828616352	0.900854701	0.92474645	0.07525355	0.506263817	0.90513834	0.649338374
346	1	0	1	1	1	0.829411765	0.170588235	0.986891386	0.828616352	0.900854701	0.92474645	0.07525355	0.506263817	0.90513834	0.649338374
346	1	0	1	1	1	0.829411765	0.170588235	0.986891386	0.828616352	0.900854701	0.92474645	0.07525355	0.506263817	0.90513834	0.649338374
346	1	0	1	1	1	0.829411765	0.170588235	0.986891386	0.828616352	0.900854701	0.92474645	0.07525355	0.506263817	0.90513834	0.649338374
346	1	0	1	1	1	0.829411765	0.170588235	0.986891386	0.828616352	0.900854701	0.92474645	0.07525355	0.506263817	0.90513834	0.649338374
346	1	0	1	1	1	0.829411765	0.170588235	0.986891386	0.828616352	0.900854701	0.92474645	0.07525355	0.506263817	0.90513834	0.649338374
346	1	0	1	1	1	0.829411765	0.170588235	0.986891386	0.828616352	0.900854701	0.92474645	0.07525355	0.506263817	0.90513834	0.649338374
346	1	0	1	1	1	0.829411765	0.170588235	0.986891386	0.828616352	0.900854701	0.92474645	0.07525355	0.506263817	0.90513834	0.649338374
346	1	0	1	1	1	0.829411765	0.170588235	0.986891386	0.828616352	0.900854701	0.92474645	0.07525355	0.506263817	0.90513834	0.649338374
346	1	0	1	1	1	0.829411765	0.170588235	0.986891386	0.828616352	0.900854701	0.92474645	0.07525355	0.506263817	0.90513834	0.649338374
346	1	0	1	1	1	0.829411765	0.170588235	0.986891386	0.828616352	0.900854701	0.92474645	0.07525355	0.506263817	0.90513834	0.649338374
346	1	0	1	1	1	0.829411765	0.170588235	0.986891386	0.828616352	0.900854701	0.92474645	0.07525355	0.506263817	0.90513834	0.649338374
346	1	0	1	1	1	0.829411765	0.170588235	0.986891386	0.828616352	0.900854701	0.92474645	0.07525355	0.506263817	0.90513834	0.649338374
346	1	0	1	1	1	0.829411765	0.170588235	0.986891386	0.828616352	0.900854701	0.92474645	0.07525355	0.506263817	0.90513834	0.649338374
346	1	0	1	1	1	0.829411765	0.170588235	0.986891386	0.828616352	0.900854701	0.92474645	0.07525355	0.506263817	0.90513834	0.649338374
346	1	0	1	1	1	0.829411765	0.170588235	0.986891386	0.828616352	0.900854701	0.92474645	0.07525355	0.506263817	0.90513834	0.649338374
346	1	0	1	1	1	0.829411765	0.170588235	0.986891386	0.828616352	0.900854701	0.92474645	0.07525355	0.506263817	0.90513834	0.649338374
346	1	0	1	1	1	0.829411765	0.170588235	0.986891386	0.828616352	0.900854701	0.92474645	0.07525355	0.506263817	0.90513834	0.649338374
346	1	0	1	1	1	0.829411765	0.170588235	0.986891386	0.828616352	0.900854701	0.92474645	0.07525355	0.506263817	0.90513834	0.649338374
346	1	0	1	1	1	0.829411765	0.170588235	0.986891386	0.828616352	0.900854701	0.92474645	0.07525355	0.506263817	0.90513834	0.649338374
346	1	0	1	1	1	0.829411765	0.170588235	0.986891386	0.828616352	0.900854701	0.92474645	0.07525355	0.506263817	0.90513834	0.649338374
346	1	0	1	1	1	0.829411765	0.170588235	0.986891386	0.828616352	0.900854701	0.92474645	0.07525355	0.506263817	0.90513834	0.649338374
346	1	0	1	1	1	0.829411765	0.170588235	0.986891386	0.828616352	0.900854701	0.92474645	0.07525355	0.506263817	0.90513834	0.649338374
346	1	0	1	1	1	0.829411765	0.170588235	0.986891386	0.828616352	0.900854701	0.92474645	0.07525355	0.506263817	0.90513834	0.649338374
346	1	0	1	1	1	0.829411765	0.170588235	0.986891386	0.828616352	0.900854701	0.92474645	0.07525355	0.506263817	0.90513834	0.649338374
346	1	0	1	1	1	0.829411765	0.170588235	0.986891386	0.828616352	0.900854701	0.92474645	0.07525355	0.506263817	0.90513834	0.649338374
346	1	0	1	1	1	0.829411765	0.170588235	0.986891386	0.828616352	0.900854701	0.92474645	0.07525355	0.506263817	0.90513834	0.649338374
346	1	0	1	1	1	0.829411765	0.170588235	0.986891386	0.828616352	0.900854701	0.92474645	0.07525355	0.506263817	0.90513834	0.649338374
346	1	0	1	1	1	0.829411765	0.170588235	0.986891386	0.828616352	0.900854701	0.92474645	0.07525355	0.506263817	0.90513834	0.649338374
346	1	0	1	1	1	0.829411765	0.170588235	0.986891386	0.828616352	0.900854701	0.92474645	0.07525355	0.506263817	0.90513834	0.649338374
346	1	0	1	1	1	0.829411765	0.170588235	0.986891386	0.828616352	0.900854701	0.92474645	0.07525355	0.506263817	0.90513834	0.649338374
346	1	0	1	1	1	0.829411765	0.170588235	0.986891386	0.828616352	0.900854701	0.92474645	0.07525355	0.506263817	0.90513834	0.649338374
346	1	0	1	1	1	0.829411765	0.170588235	0.986891386	0.828616352	0.900854701	0.92474645	0.07525355	0.506263817	0.90513834	0.649338374
346	1	0	1	1	1	0.829411765	0.170588235	0.986891386	0.828616352	0.900854701	0.92474645	0.07525355	0.506263817	0.90513834	0.649338374
346	1	0	1	1	1	0.829411765	0.170588235	0.986891386	0.828616352	0.900854701	0.92474645	0.07525355	0.506263817	0.90513834	0.649338374
346	1	0	1	1	1	0.829411765	0.170588235	0.986891386	0.828616352	0.900854701	0.92474645	0.07525355	0.506263817	0.90513834	0.649338374
346	1	0	1	1	1	0.829411765	0.170588235	0.986891386	0.828616352	0.900854701	0.92474645	0.07525355	0.506263817	0.90513834	0.649338374
346	1	0	1	1	1	0.829411765	0.170588235	0.986891386	0.828616352	0.900854701	0.92474645	0.07525355	0.506263817	0.90513834	0.649338374
346	1	0	1	1	1	0.829411765	0.170588235	0.986891386	0.828616352	0.900854701	0.92474645	0.07525355	0.506263817	0.90513834	0.649338374
346	1	0	1	1	1	0.829411765	0.170588235	0.986891386	0.828616352	0.900854701	0.92474645	0.07525355	0.506263817	0.90513834	0.649338374
346	1	0	1	1	1	0.829411765	0.170588235	0.986891386	0.828616352	0.900854701	0.92474645	0.07525355	0.506263817	0.90513834	0.649338374
346	1	0	1	1	1	0.829411765	0.170588235	0.986891386	0.828616352	0.900854701	0.92474645	0.07525355	0.506263817	0.90513834	0.649338374
346	1	0	1	1	1	0.829411765	0.170588235	0.986891386	0.828616352	0.900854701	0.92474645	0.07525355	0.506263817	0.90513834	0.649338374
346	1	0	1	1	1	0.829411765	0.170588235	0.986891386	0.828616352	0.900854701	0.92474645	0.07525355	0.506263817	0.90513834	0.649338374
346	1	0	1	1	1	0.829411765	0.170588235	0.986891386	0.828616352	0.900854701	0.92474645	0.07525355	0.506263817	0.90513834	0.649338374
346	1	0	1	1	1	0.829411765	0.170588235	0.986891386	0.828616352	0.900854701	0.92474645	0.07525355	0.506263817	0.90513834	0.649338374
346	1	0	1	1	1	0.829411765	0.170588235	0.986891386	0.828616352	0.900854701	0.92474645	0.07525355	0.506263817	0.90513834	0.649338374
346	1	0	1	1	1	0.829411765	0.170588235	0.986891386	0.828616352	0.900854701	0.92474645	0.07525355	0.506263817	0.90513834	0.649338374
346	1	0	1	1	1	0.829411765	0.170588235	0.986891386	0.828616352	0.900854701	0.92474645	0.07525355	0.506263817	0.90513834	0.649338374
346	1	0	1	1	1	0.829411765	0.170588235	0.986891386	0.828616352	0.900854701	0.92474645	0.07525355	0.506263817	0.90513834	0.649338374
346	1	0	1	1	1	0.829411765	0.170588235	0.986891386	0.828616352	0.900854701	0.92474645	0.07525355	0.506263817	0.90513834	0.649338374
346	1	0	1	1	1	0.829411765	0.170588235	0.986891386	0.828616352	0.900854701	0.92474645	0.07525355	0.506263817	0.90513834	0.649338374
346	1	0	1	1	1	0.829411765	0.170588235	0.986891386	0.828616352	0.900854701	0.92474645	0.07525355	0.506263817	0.90513834	0.649338374
346	1	0	1	1	1	0.829411765	0.170588235	0.986891386	0.828616352	0.900854701	0.92474645	0.07525355	0.506263817	0.90513834	0.649338374
346	1	0	1	1	1	0.829411765	0.170588235	0.986891386	0.828616352	0.900854701	0.92474645	0.07525355	0.506263817	0.90513834	0.649338374
346	1	0	1	1	1	0.829411765	0.170588235	0.986891386	0.828616352	0.900854701	0.92474645	0.07525355	0.506263817	0.90513834	0.649338374
346	1	0	1	1	1	0.829411765	0.170588235	0.986891386	0.828616352	0.900854701	0.92474645	0.07525355	0.506263817	0.90513834	0.649338374
346	1	0	1	1	1	0.829411765	0.170588235	0.986891386	0.828616352	0.900854701	0.92474645	0.07525355	0.506263817	0.90513834	0.649338374
346	1	0	1	1	1	0.829411765	0.170588235	0.986891386	0.828616352	0.900854701	0.92474645	0.07525355	0.506263817	0.90513834	0.649338374
346	1	0	1	1	1	0.829411765	0.170588235	0.986891386	0.828616352	0.900854701	0.92474645	0.07525355	0.506263817	0.90513834	0.649338374
346	1	0	1	1	1	0.829411765	0.170588235	0.986891386	0.828616352	0.900854701	0.92474645	0.07525355	0.506263817	0.90513834	0.649338374
346	1	0	1	1	1	0.829411765	0.170588235	0.986891386	0.828616352	0.900854701	0.92474645	0.07525355	0.506263817	0.90513834	0.649338374
346	1	0	1	1	1	0.829411765	0.170588235	0.986891386	0.828616352	0.900854701	0.92474645	0.07525355	0.506263817	0.90513834	0.649338374
346	1	0	1	1	1	0.829411765	0.170588235	0.986891386	0.828616352	0.900854701	0.92474645	0.07525355	0.506263817	0.90513834	0.649338374
346	1	0	1	1	1	0.829411765	0.170588235	0.986891386	0.828616352	0.900854701	0.92474645	0.07525355	0.506263817	0.90513834	0.649338374
346	1	0	1	1	1	0.829411765	0.170588235	0.986891386	0.828616352	0.900854701	0.92474645	0.07525355	0.506263817	0.90513834	0.649338374
346	1	0	1	1	1	0.829411765	0.170588235	0.986891386	0.828616352	0.900854701	0.92474645	0.07525355	0.506263817	0.90513834	0.649338374
346	1	0	1	1	1	0.829411765	0.170588235	0.986891386	0.828616352	0.900854701	0.92474645	0.07525355	0.506263817	0.90513834	0.649338374
346	1	0	1	1	1	0.829411765	0.170588235	0.986891386	0.828616352	0.900854701	0.92474645	0.07525355	0.506263817	0.90513834	0.649338374
346	1	0	1	1	1	0.829411765	0.170588235	0.986891386	0.828616352	0.900854701	0.92474645	0.07525355	0.506263817	0.90513834	0.649338374
346	1	0	1	1	1	0.829411765	0.170588235	0.986891386	0.828616352	0.900854701	0.92474645	0.07525355	0.506263817	0.90513834	0.649338374
346	1	0	1	1	1	0.829411765	0.170588235	0.986891386	0.828616352	0.900854701	0.92474645	0.07525355	0.506263817	0.90513834	0.649338374
346	1	0	1	1	1	0.829411765	0.170588235	0.986891386	0.828616352	0.900854701	0.92474645	0.07525355	0.506263817	0.90513834	0.649338374
346	1	0	1	1	1	0.829411765	0.170588235	0.986891386	0.828616352	0.900854701	0.92474645	0.07525355	0.506263817	0.90513834	0.649338374
346	1	0	1	1	1	0.829411765	0.170588235	0.986891386	0.828616352	0.900854701	0.92474645	0.07525355	0.506263817	0.90513834	0.649338374
346	1	0	1	1	1	0.829411765	0.170588235	0.986891386	0.828616352	0.900854701	0.92474645	0.07525355	0.506263817	0.90513834	0.649338374
346	1	0	1	1	1	0.829411765	0.170588235	0.986891386	0.828616352	0.900854701	0.92474645	0.07525355	0.506263817	0.90513834	0.649338374
346	1	0	1	1	1	0.829411765	0.170588235	0.986891386	0.828616352	0.900854701	0.92474645	0.07525355	0.506263817	0.90513834	0.649338374
346	1	0	1	1	1	0.829411765	0.170588235	0.986891386	0.828616352	0.900854701	0.92474645	0.07525355	0.506263817	0.90513834	0.649338374
346	1	0	1	1	1	0.829411765	0.170588235	0.986891386	0.828616352	0.900854701	0.92474645	0.07525355	0.506263817	0.90513834	0.649338374
346	1	0	1	1	1	0.829411765	0.170588235	0.986891386	0.828616352	0.900854701	0.92474645	0.07525355	0.506263817	0.90513834	0.649338374
346	1	0	1	1	1	0.829411765	0.170588235	0.986891386	0.828616352	0.900854701	0.92474645	0.07525355	0.506263817	0.90513834	0.649338374
346	1	0	1	1	1	0.829411765	0.170588235	0.986891386	0.828616352	0.900854701	0.92474645	0.07525355	0.506263817	0.90513834	0.649338374
346	1	0	1	1	1	0.829411765	0.170588235	0.986891386	0.828616352	0.900854701	0.92474645	0.07525355	0.506263817	0.90513834	0.649338374
346	1	0	1	1	1	0.829411765	0.170588235	0.986891386	0.828616352	0.900854701	0.92474645	0.07525355	0.506263817	0.90513834	0.649338374
346	1	0	1	1	1	0.829411765	0.170588235	0.986891386	0.828616352	0.900854701	0.92474645	0.07525355	0.506263817	0.90513834	0.649338374
346	1	0	1	1	1	0.829411765	0.170588235	0.986891386	0.828616352	0.900854701	0.92474645	0.07525355	0.506263817	0.90513834	0.649338374
346	1	0	1	1	1	0.829411765	0.170588235	0.986891386	0.828616352	0.900854701	0.92474645	0.07525355	0.506263817	0.90513834	0.649338374
346	1	0	1	1	1	0.829411765	0.170588235	0.986891386	0.828616352	0.900854701	0.92474645	0.07525355	0.506263817	0.90513834	0.649338374
346	1	0	1	1	1	0.829411765	0.170588235	0.986891386	0.828616352	0.900854701	0.92474645	0.07525355	0.506263817	0.90513834	0.649338374
346	1	0	1	1	1	0.829411765	0.170588235	0.986891386	0.828616352	0.900854701	0.92474645	0.07525355	0.506263817	0.90513834	0.649338374
346	1	0	1	1	1	0.829411765	0.170588235	0.986891386	0.828616352	0.900854701	0.92474645	0.07525355	0.506263817	0.90513834	0.649338374
346	1	0	1	1	1	0.829411765	0.170588235	0.986891386	0.828616352	0.900854701	0.92474645	0.07525355	0.506263817	0.90513834	0.649338374
346	1	0	1	1	1	0.829411765	0.170588235	0.986891386	0.828616352	0.900854701	0.92474645	0.07525355	0.506263817	0.90513834	0.649338374
346	1	0	1	1	1	0.829411765	0.170588235	0.986891386	0.828616352	0.900854701	0.92474645	0.07525355	0.506263817	0.90513834	0.649338374
346	1	0	1	1	1	0.829411765	0.170588235	0.986891386	0.828616352	0.900854701	0.92474645	0.07525355	0.506263817	0.90513834	0.649338374
346	1	0	1	1	1	0.829411765	0.170588235	0.986891386	0.828616352	0.900854701	0.92474645	0.07525355	0.506263817	0.90513834	0.649338374
346	1	0	1	1	1	0.829411765	0.170588235	0.986891386	0.828616352	0.900854701	0.92474645	0.07525355	0.506263817	0.90513834	0.649338374
346	1	0	1	1	1	0.829411765	0.170588235	0.986891386	0.828616352	0.900854701	0.92474645	0.07525355	0.506263817	0.90513834	0.649338374
346	1	0	1	1	1	0.829411765	0.170588235	0.986891386	0.828616352	0.900854701	0.92474645	0.07525355	0.506263817	0.90513834	0.649338374
346	1	0	1	1	1	0.829411765	0.170588235	0.986891386	0.828616352	0.900854701	0.92474645	0.07525355	0.506263817	0.90513834	0.649338374
346	1	0	1	1	1	0.829411765	0.170588235	0.986891386	0.828616352	0.900854701	0.92474645	0.07525355	0.506263817	0.90513834	0.649338374
346	1	0	1	1	1	0.829411765	0.170588235	0.986891386	0.828616352	0.900854701	0.92474645	0.07525355	0.506263817	0.90513834	0.649338374
346	1	0	1	1	1	0.829411765	0.170588235	0.986891386	0.828616352	0.900854701	0.92474645	0.07525355	0.506263817	0.90513834	0.649338374
346	1	0	1	1	1	0.829411765	0.170588235	0.986891386	0.828616352	0.900854701	0.92474645	0.07525355	0.506263817	0.90513834	0.649338374
346	1	0	1	1	1	0.829411765	0.170588235	0.986891386	0.828616352	0.900854701	0.92474645	0.07525355	0.506263817	0.90513834	0.649338374
346	1	0	1	1	1	0.829411765	0.170588235	0.986891386	0.828616352	0.900854701	0.92474645	0.07525355	0.506263817	0.90513834	0.649338374
346	1	0	1	1	1	0.829411765	0.170588235	0.986891386	0.828616352	0.900854701	0.92474645	0.07525355	0.506263817	0.90513834	0.649338374
346	1	0	1	1	1	0.829411765	0.170588235	0.986891386	0.828616352	0.900854701	0.92474645	0.07525355	0.506263817	0.90513834	0.649338374
346	1	0	1	1	1	0.829411765	0.170588235	0.986891386	0.828616352	0.900854701	0.92474645	0.07525355	0.506263817	0.90513834	0.649338374
346	1	0	1	1	1	0.829411765	0.170588235	0.986891386	0.828616352	0.900854701	0.92474645	0.07525355	0.506263817	0.90513834	0.649338374
346	1	0	1	1	1	0.829411765	0.170588235	0.986891386	0.828616352	0.900854701	0.92474645	0.07525355	0.506263817	0.90513834	0.649338374
346	1	0	1	1	1	0.829411765	0.170588235	0.986891386	0.828616352	0.900854701	0.92474645	0.07525355	0.506263817	0.90513834	0.649338374
346	1	0	1	1	1	0.829411765	0.170588235	0.986891386	0.828616352	0.900854701	0.92474645	0.07525355	0.506263817	0.90513834	0.649338374
346	1	0	1	1	1	0.829411765	0.170588235	0.986891386	0.828616352	0.900854701	0.92474645	0.07525355	0.506263817	0.90513834	0.649338374
346	1	0	1	1	1	0.829411765	0.170588235	0.986891386	0.828616352	0.900854701	0.92474645	0.07525355	0.506263817	0.90513834	0.649338374
346	1	0	1	1	1	0.829411765	0.170588235	0.986891386	0.828616352	0.900854701	0.92474645	0.07525355	0.506263817	0.90513834	0.649338374
346	1	0	1	1	1	0.829411765	0.170588235	0.986891386	0.828616352	0.900854701	0.92474645	0.07525355	0.506263817	0.90513834	0.649338374
346	1	0	1	1	1	0.829411765	0.170588235	0.986891386	0.828616352	0.900854701	0.92474645	0.07525355	0.506263817	0.90513834	0.649338374
346	1	0	1	1	1	0.829411765	0.170588235	0.986891386	0.828616352	0.900854701	0.92474645	0.07525355	0.506263817	0.90513834	0.649338374
346	1	0	1	1	1	0.829411765	0.170588235	0.986891386	0.828616352	0.900854701	0.92474645	0.07525355	0.506263817	0.90513834	0.649338374
346	1	0	1	1	1	0.829411765	0.170588235	0.986891386	0.828616352	0.900854701	0.92474645	0.07525355	0.506263817	0.90513834	0.649338374
346	1	0	1	1	1	0.829411765	0.170588235	0.986891386	0.828616352	0.900854701	0.92474645	0.07525355	0.506263817	0.90513834	0.649338374
346	1	0	1	1	1	0.829411765	0.170588235	0.986891386	0.828616352	0.900854701	0.92474645	0.07525355	0.506263817	0.90513834	0.649338374
346	1	0	1	1	1	0.829411765	0.170588235	0.986891386	0.828616352	0.900854701	0.92474645	0.07525355	0.506263817	0.90513834	0.649338374
346	1	0	1	1	1	0.829411765	0.170588235	0.986891386	0.828616352	0.900854701	0.92474645	0.07525355	0.506263817	0.90513834	0.649338374
345	1	0	1	1	1	0.821192053	0.178807947	0.995918367	0.821548822	0.900369004	0.924416264	0.075583736	0.517755682	0.91011236	0.660027162
344	1	0	1	1	1	0.829103215	0.170896785	0.997929607	0.828178694	0.905164319	0.925319128	0.074680872	0.525	0.904059041	0.664256665
343	1	0	1	1	1	0.829896907	0.170103093	0.99790795	0.829565217	0.905982906	0.927796746	0.072203254	0.53662074	0.902439024	0.673033197
343	1	0	1	1	1	0.829896907	0.170103093	0.99790795	0.829565217	0.905982906	0.927796746	0.072203254	0.53662074	0.902439024	0.673033197
343	1	0	1	1	1	0.829896907	0.170103093	0.99790795	0.829565217	0.905982906	0.927796746	0.072203254	0.53662074	0.902439024	0.673033197
343	1	0	1	1	1	0.829896907	0.170103093	0.99790795	0.829565217	0.905982906	0.927796746	0.072203254	0.53662074	0.902439024	0.673033197
342	1	0	1	1	1	0.837127846	0.162872154	0.997885835	0.836879433	0.910318226	0.928377972	0.071622028	0.542360608	0.901323706	0.67721519
342	1	0	1	1	1	0.837127846	0.162872154	0.997885835	0.836879433	0.910318226	0.928377972	0.071622028	0.542360608	0.901323706	0.67721519
341	1	0	1	1	1	0.747933884	0.252066116	1	0.747933884	0.855791962	0.954852824	0.045147176	0.685923515	0.925356751	0.787850467
341	1	0	1	1	1	0.747933884	0.252066116	1	0.747933884	0.855791962	0.954852824	0.045147176	0.685923515	0.925356751	0.787850467
341	1	0	1	1	1	0.747933884	0.252066116	1	0.747933884	0.855791962	0.954852824	0.045147176	0.685923515	0.925356751	0.787850467
341	1	0	1	1	1	0.747933884	0.252066116	1	0.747933884	0.855791962	0.954852824	0.045147176	0.685923515	0.925356751	0.787850467
341	1	0	1	1	1	0.747933884	0.252066116	1	0.747933884	0.855791962	0.954852824	0.045147176	0.685923515	0.925356751	0.787850467
341	1	0	1	1	1	0.747933884	0.252066116	1	0.747933884	0.855791962	0.954852824	0.045147176	0.685923515	0.925356751	0.787850467
341	1	0	1	1	1	0.747933884	0.252066116	1	0.747933884	0.855791962	0.954852824	0.045147176	0.685923515	0.925356751	0.787850467
341	1	0	1	1	1	0.747933884	0.252066116	1	0.747933884	0.855791962	0.954852824	0.045147176	0.685923515	0.925356751	0.787850467
341	1	0	1	1	1	0.747933884	0.252066116	1	0.747933884	0.855791962	0.954852824	0.045147176	0.685923515	0.925356751	0.787850467
341	1	0	1	1	1	0.747933884	0.252066116	1	0.747933884	0.855791962	0.954852824	0.045147176	0.685923515	0.925356751	0.787850467
341	1	0	1	1	1	0.747933884	0.252066116	1	0.747933884	0.855791962	0.954852824	0.045147176	0.685923515	0.925356751	0.787850467
341	1	0	1	1	1	0.747933884	0.252066116	1	0.747933884	0.855791962	0.954852824	0.045147176	0.685923515	0.925356751	0.787850467
341	1	0	1	1	1	0.747933884	0.252066116	1	0.747933884	0.855791962	0.954852824	0.045147176	0.685923515	0.925356751	0.787850467
341	1	0	1	1	1	0.747933884	0.252066116	1	0.747933884	0.855791962	0.954852824	0.045147176	0.685923515	0.925356751	0.787850467
341	1	0	1	1	1	0.747933884	0.252066116	1	0.747933884	0.855791962	0.954852824	0.045147176	0.685923515	0.925356751	0.787850467
341	1	0	1	1	1	0.747933884	0.252066116	1	0.747933884	0.855791962	0.954852824	0.045147176	0.685923515	0.925356751	0.787850467
341	1	0	1	1	1	0.747933884	0.252066116	1	0.747933884	0.855791962	0.954852824	0.045147176	0.685923515	0.925356751	0.787850467
341	1	0	1	1	1	0.747933884	0.252066116	1	0.747933884	0.855791962	0.954852824	0.045147176	0.685923515	0.925356751	0.787850467
341	1	0	1	1	1	0.747933884	0.252066116	1	0.747933884	0.855791962	0.954852824	0.045147176	0.685923515	0.925356751	0.787850467
341	1	0	1	1	1	0.747933884	0.252066116	1	0.747933884	0.855791962	0.954852824	0.045147176	0.685923515	0.925356751	0.787850467
341	1	0	1	1	1	0.747933884	0.252066116	1	0.747933884	0.855791962	0.954852824	0.045147176	0.685923515	0.925356751	0.787850467
341	1	0	1	1	1	0.747933884	0.252066116	1	0.747933884	0.855791962	0.954852824	0.045147176	0.685923515	0.925356751	0.787850467
341	1	0	1	1	1	0.747933884	0.252066116	1	0.747933884	0.855791962	0.954852824	0.045147176	0.685923515	0.925356751	0.787850467
341	1	0	1	1	1	0.747933884	0.252066116	1	0.747933884	0.855791962	0.954852824	0.045147176	0.685923515	0.925356751	0.787850467
341	1	0	1	1	1	0.747933884	0.252066116	1	0.747933884	0.855791962	0.954852824	0.045147176	0.685923515	0.925356751	0.787850467
341	1	0	1	1	1	0.747933884	0.252066116	1	0.747933884	0.855791962	0.954852824	0.045147176	0.685923515	0.925356751	0.787850467
341	1	0	1	1	1	0.747933884	0.252066116	1	0.747933884	0.855791962	0.954852824	0.045147176	0.685923515	0.925356751	0.787850467
341	1	0	1	1	1	0.747933884	0.252066116	1	0.747933884	0.855791962	0.954852824	0.045147176	0.685923515	0.925356751	0.787850467
341	1	0	1	1	1	0.747933884	0.252066116	1	0.747933884	0.855791962	0.954852824	0.045147176	0.685923515	0.925356751	0.787850467
341	1	0	1	1	1	0.747933884	0.252066116	1	0.747933884	0.855791962	0.954852824	0.045147176	0.685923515	0.925356751	0.787850467
341	1	0	1	1	1	0.747933884	0.252066116	1	0.747933884	0.855791962	0.954852824	0.045147176	0.685923515	0.925356751	0.787850467
341	1	0	1	1	1	0.747933884	0.252066116	1	0.747933884	0.855791962	0.954852824	0.045147176	0.685923515	0.925356751	0.787850467
341	1	0	1	1	1	0.747933884	0.252066116	1	0.747933884	0.855791962	0.954852824	0.045147176	0.685923515	0.925356751	0.787850467
341	1	0	1	1	1	0.747933884	0.252066116	1	0.747933884	0.855791962	0.954852824	0.045147176	0.685923515	0.925356751	0.787850467
341	1	0	1	1	1	0.747933884	0.252066116	1	0.747933884	0.855791962	0.954852824	0.045147176	0.685923515	0.925356751	0.787850467
341	1	0	1	1	1	0.747933884	0.252066116	1	0.747933884	0.855791962	0.954852824	0.045147176	0.685923515	0.925356751	0.787850467
341	1	0	1	1	1	0.747933884	0.252066116	1	0.747933884	0.855791962	0.954852824	0.045147176	0.685923515	0.925356751	0.787850467
341	1	0	1	1	1	0.747933884	0.252066116	1	0.747933884	0.855791962	0.954852824	0.045147176	0.685923515	0.925356751	0.787850467
341	1	0	1	1	1	0.747933884	0.252066116	1	0.747933884	0.855791962	0.954852824	0.045147176	0.685923515	0.925356751	0.787850467
341	1	0	1	1	1	0.747933884	0.252066116	1	0.747933884	0.855791962	0.954852824	0.045147176	0.685923515	0.925356751	0.787850467
341	1	0	1	1	1	0.747933884	0.252066116	1	0.747933884	0.855791962	0.954852824	0.045147176	0.685923515	0.925356751	0.787850467
341	1	0	1	1	1	0.747933884	0.252066116	1	0.747933884	0.855791962	0.954852824	0.045147176	0.685923515	0.925356751	0.787850467
341	1	0	1	1	1	0.747933884	0.252066116	1	0.747933884	0.855791962	0.954852824	0.045147176	0.685923515	0.925356751	0.787850467
341	1	0	1	1	1	0.747933884	0.252066116	1	0.747933884	0.855791962	0.954852824	0.045147176	0.685923515	0.925356751	0.787850467
341	1	0	1	1	1	0.747933884	0.252066116	1	0.747933884	0.855791962	0.954852824	0.045147176	0.685923515	0.925356751	0.787850467
341	1	0	1	1	1	0.747933884	0.252066116	1	0.747933884	0.855791962	0.954852824	0.045147176	0.685923515	0.925356751	0.787850467
341	1	0	1	1	1	0.747933884	0.252066116	1	0.747933884	0.855791962	0.954852824	0.045147176	0.685923515	0.925356751	0.787850467
341	1	0	1	1	1	0.747933884	0.252066116	1	0.747933884	0.855791962	0.954852824	0.045147176	0.685923515	0.925356751	0.787850467
341	1	0	1	1	1	0.747933884	0.252066116	1	0.747933884	0.855791962	0.954852824	0.045147176	0.685923515	0.925356751	0.787850467
341	1	0	1	1	1	0.747933884	0.252066116	1	0.747933884	0.855791962	0.954852824	0.045147176	0.685923515	0.925356751	0.787850467
341	1	0	1	1	1	0.747933884	0.252066116	1	0.747933884	0.855791962	0.954852824	0.045147176	0.685923515	0.925356751	0.787850467
341	1	0	1	1	1	0.747933884	0.252066116	1	0.747933884	0.855791962	0.954852824	0.045147176	0.685923515	0.925356751	0.787850467
341	1	0	1	1	1	0.747933884	0.252066116	1	0.747933884	0.855791962	0.954852824	0.045147176	0.685923515	0.925356751	0.787850467
341	1	0	1	1	1	0.747933884	0.252066116	1	0.747933884	0.855791962	0.954852824	0.045147176	0.685923515	0.925356751	0.787850467
341	1	0	1	1	1	0.747933884	0.252066116	1	0.747933884	0.855791962	0.954852824	0.045147176	0.685923515	0.925356751	0.787850467
341	1	0	1	1	1	0.747933884	0.252066116	1	0.747933884	0.855791962	0.954852824	0.045147176	0.685923515	0.925356751	0.787850467
341	1	0	1	1	1	0.747933884	0.252066116	1	0.747933884	0.855791962	0.954852824	0.045147176	0.685923515	0.925356751	0.787850467
341	1	0	1	1	1	0.747933884	0.252066116	1	0.747933884	0.855791962	0.954852824	0.045147176	0.685923515	0.925356751	0.787850467
341	1	0	1	1	1	0.747933884	0.252066116	1	0.747933884	0.855791962	0.954852824	0.045147176	0.685923515	0.925356751	0.787850467
341	1	0	1	1	1	0.747933884	0.252066116	1	0.747933884	0.855791962	0.954852824	0.045147176	0.685923515	0.925356751	0.787850467
341	1	0	1	1	1	0.747933884	0.252066116	1	0.747933884	0.855791962	0.954852824	0.045147176	0.685923515	0.925356751	0.787850467
341	1	0	1	1	1	0.747933884	0.252066116	1	0.747933884	0.855791962	0.954852824	0.045147176	0.685923515	0.925356751	0.787850467
341	1	0	1	1	1	0.747933884	0.252066116	1	0.747933884	0.855791962	0.954852824	0.045147176	0.685923515	0.925356751	0.787850467
341	1	0	1	1	1	0.747933884	0.252066116	1	0.747933884	0.855791962	0.954852824	0.045147176	0.685923515	0.925356751	0.787850467
341	1	0	1	1	1	0.747933884	0.252066116	1	0.747933884	0.855791962	0.954852824	0.045147176	0.685923515	0.925356751	0.787850467
341	1	0	1	1	1	0.747933884	0.252066116	1	0.747933884	0.855791962	0.954852824	0.045147176	0.685923515	0.925356751	0.787850467
341	1	0	1	1	1	0.747933884	0.252066116	1	0.747933884	0.855791962	0.954852824	0.045147176	0.685923515	0.925356751	0.787850467
341	1	0	1	1	1	0.747933884	0.252066116	1	0.747933884	0.855791962	0.954852824	0.045147176	0.685923515	0.925356751	0.787850467
341	1	0	1	1	1	0.747933884	0.252066116	1	0.747933884	0.855791962	0.954852824	0.045147176	0.685923515	0.925356751	0.787850467
341	1	0	1	1	1	0.747933884	0.252066116	1	0.747933884	0.855791962	0.954852824	0.045147176	0.685923515	0.925356751	0.787850467
341	1	0	1	1	1	0.747933884	0.252066116	1	0.747933884	0.855791962	0.954852824	0.045147176	0.685923515	0.925356751	0.787850467
341	1	0	1	1	1	0.747933884	0.252066116	1	0.747933884	0.855791962	0.954852824	0.045147176	0.685923515	0.925356751	0.787850467
341	1	0	1	1	1	0.747933884	0.252066116	1	0.747933884	0.855791962	0.954852824	0.045147176	0.685923515	0.925356751	0.787850467
341	1	0	1	1	1	0.747933884	0.252066116	1	0.747933884	0.855791962	0.954852824	0.045147176	0.685923515	0.925356751	0.787850467
341	1	0	1	1	1	0.747933884	0.252066116	1	0.747933884	0.855791962	0.954852824	0.045147176	0.685923515	0.925356751	0.787850467
341	1	0	1	1	1	0.747933884	0.252066116	1	0.747933884	0.855791962	0.954852824	0.045147176	0.685923515	0.925356751	0.787850467
341	1	0	1	1	1	0.747933884	0.252066116	1	0.747933884	0.855791962	0.954852824	0.045147176	0.685923515	0.925356751	0.787850467
341	1	0	1	1	1	0.747933884	0.252066116	1	0.747933884	0.855791962	0.954852824	0.045147176	0.685923515	0.925356751	0.787850467
341	1	0	1	1	1	0.747933884	0.252066116	1	0.747933884	0.855791962	0.954852824	0.045147176	0.685923515	0.925356751	0.787850467
341	1	0	1	1	1	0.747933884	0.252066116	1	0.747933884	0.855791962	0.954852824	0.045147176	0.685923515	0.925356751	0.787850467
341	1	0	1	1	1	0.747933884	0.252066116	1	0.747933884	0.855791962	0.954852824	0.045147176	0.685923515	0.925356751	0.787850467
341	1	0	1	1	1	0.747933884	0.252066116	1	0.747933884	0.855791962	0.954852824	0.045147176	0.685923515	0.925356751	0.787850467
341	1	0	1	1	1	0.747933884	0.252066116	1	0.747933884	0.855791962	0.954852824	0.045147176	0.685923515	0.925356751	0.787850467
341	1	0	1	1	1	0.747933884	0.252066116	1	0.747933884	0.855791962	0.954852824	0.045147176	0.685923515	0.925356751	0.787850467
341	1	0	1	1	1	0.747933884	0.252066116	1	0.747933884	0.855791962	0.954852824	0.045147176	0.685923515	0.925356751	0.787850467
341	1	0	1	1	1	0.747933884	0.252066116	1	0.747933884	0.855791962	0.954852824	0.045147176	0.685923515	0.925356751	0.787850467
341	1	0	1	1	1	0.747933884	0.252066116	1	0.747933884	0.855791962	0.954852824	0.045147176	0.685923515	0.925356751	0.787850467
341	1	0	1	1	1	0.747933884	0.252066116	1	0.747933884	0.855791962	0.954852824	0.045147176	0.685923515	0.925356751	0.787850467
341	1	0	1	1	1	0.747933884	0.252066116	1	0.747933884	0.855791962	0.954852824	0.045147176	0.685923515	0.925356751	0.787850467
341	1	0	1	1	1	0.747933884	0.252066116	1	0.747933884	0.855791962	0.954852824	0.045147176	0.685923515	0.925356751	0.787850467
341	1	0	1	1	1	0.747933884	0.252066116	1	0.747933884	0.855791962	0.954852824	0.045147176	0.685923515	0.925356751	0.787850467
341	1	0	1	1	1	0.747933884	0.252066116	1	0.747933884	0.855791962	0.954852824	0.045147176	0.685923515	0.925356751	0.787850467
341	1	0	1	1	1	0.747933884	0.252066116	1	0.747933884	0.855791962	0.954852824	0.045147176	0.685923515	0.925356751	0.787850467
341	1	0	1	1	1	0.747933884	0.252066116	1	0.747933884	0.855791962	0.954852824	0.045147176	0.685923515	0.925356751	0.787850467
341	1	0	1	1	1	0.747933884	0.252066116	1	0.747933884	0.855791962	0.954852824	0.045147176	0.685923515	0.925356751	0.787850467
341	1	0	1	1	1	0.747933884	0.252066116	1	0.747933884	0.855791962	0.954852824	0.045147176	0.685923515	0.925356751	0.787850467
341	1	0	1	1	1	0.747933884	0.252066116	1	0.747933884	0.855791962	0.954852824	0.045147176	0.685923515	0.925356751	0.787850467
341	1	0	1	1	1	0.747933884	0.252066116	1	0.747933884	0.855791962	0.954852824	0.045147176	0.685923515	0.925356751	0.787850467
341	1	0	1	1	1	0.747933884	0.252066116	1	0.747933884	0.855791962	0.954852824	0.045147176	0.685923515	0.925356751	0.787850467
341	1	0	1	1	1	0.747933884	0.252066116	1	0.747933884	0.855791962	0.954852824	0.045147176	0.685923515	0.925356751	0.787850467
341	1	0	1	1	1	0.747933884	0.252066116	1	0.747933884	0.855791962	0.954852824	0.045147176	0.685923515	0.925356751	0.787850467
341	1	0	1	1	1	0.747933884	0.252066116	1	0.747933884	0.855791962	0.954852824	0.045147176	0.685923515	0.925356751	0.787850467
341	1	0	1	1	1	0.747933884	0.252066116	1	0.747933884	0.855791962	0.954852824	0.045147176	0.685923515	0.925356751	0.787850467
341	1	0	1	1	1	0.747933884	0.252066116	1	0.747933884	0.855791962	0.954852824	0.045147176	0.685923515	0.925356751	0.787850467
341	1	0	1	1	1	0.747933884	0.252066116	1	0.747933884	0.855791962	0.954852824	0.045147176	0.685923515	0.925356751	0.787850467
341	1	0	1	1	1	0.747933884	0.252066116	1	0.747933884	0.855791962	0.954852824	0.045147176	0.685923515	0.925356751	0.787850467
341	1	0	1	1	1	0.747933884	0.252066116	1	0.747933884	0.855791962	0.954852824	0.045147176	0.685923515	0.925356751	0.787850467
341	1	0	1	1	1	0.747933884	0.252066116	1	0.747933884	0.855791962	0.954852824	0.045147176	0.685923515	0.925356751	0.787850467
341	1	0	1	1	1	0.747933884	0.252066116	1	0.747933884	0.855791962	0.954852824	0.045147176	0.685923515	0.925356751	0.787850467
341	1	0	1	1	1	0.747933884	0.252066116	1	0.747933884	0.855791962	0.954852824	0.045147176	0.685923515	0.925356751	0.787850467
341	1	0	1	1	1	0.747933884	0.252066116	1	0.747933884	0.855791962	0.954852824	0.045147176	0.685923515	0.925356751	0.787850467
341	1	0	1	1	1	0.747933884	0.252066116	1	0.747933884	0.855791962	0.954852824	0.045147176	0.685923515	0.925356751	0.787850467
341	1	0	1	1	1	0.747933884	0.252066116	1	0.747933884	0.855791962	0.954852824	0.045147176	0.685923515	0.925356751	0.787850467
341	1	0	1	1	1	0.747933884	0.252066116	1	0.747933884	0.855791962	0.954852824	0.045147176	0.685923515	0.925356751	0.787850467
341	1	0	1	1	1	0.747933884	0.252066116	1	0.747933884	0.855791962	0.954852824	0.045147176	0.685923515	0.925356751	0.787850467
341	1	0	1	1	1	0.747933884	0.252066116	1	0.747933884	0.855791962	0.954852824	0.045147176	0.685923515	0.925356751	0.787850467
341	1	0	1	1	1	0.747933884	0.252066116	1	0.747933884	0.855791962	0.954852824	0.045147176	0.685923515	0.925356751	0.787850467
341	1	0	1	1	1	0.747933884	0.252066116	1	0.747933884	0.855791962	0.954852824	0.045147176	0.685923515	0.925356751	0.787850467
341	1	0	1	1	1	0.747933884	0.252066116	1	0.747933884	0.855791962	0.954852824	0.045147176	0.685923515	0.925356751	0.787850467
341	1	0	1	1	1	0.747933884	0.252066116	1	0.747933884	0.855791962	0.954852824	0.045147176	0.685923515	0.925356751	0.787850467
341	1	0	1	1	1	0.747933884	0.252066116	1	0.747933884	0.855791962	0.954852824	0.045147176	0.685923515	0.925356751	0.787850467
341	1	0	1	1	1	0.747933884	0.252066116	1	0.747933884	0.855791962	0.954852824	0.045147176	0.685923515	0.925356751	0.787850467
341	1	0	1	1	1	0.747933884	0.252066116	1	0.747933884	0.855791962	0.954852824	0.045147176	0.685923515	0.925356751	0.787850467
341	1	0	1	1	1	0.747933884	0.252066116	1	0.747933884	0.855791962	0.954852824	0.045147176	0.685923515	0.925356751	0.787850467
341	1	0	1	1	1	0.747933884	0.252066116	1	0.747933884	0.855791962	0.954852824	0.045147176	0.685923515	0.925356751	0.787850467
341	1	0	1	1	1	0.747933884	0.252066116	1	0.747933884	0.855791962	0.954852824	0.045147176	0.685923515	0.925356751	0.787850467
341	1	0	1	1	1	0.747933884	0.252066116	1	0.747933884	0.855791962	0.954852824	0.045147176	0.685923515	0.925356751	0.787850467
341	1	0	1	1	1	0.747933884	0.252066116	1	0.747933884	0.855791962	0.954852824	0.045147176	0.685923515	0.925356751	0.787850467
341	1	0	1	1	1	0.747933884	0.252066116	1	0.747933884	0.855791962	0.954852824	0.045147176	0.685923515	0.925356751	0.787850467
341	1	0	1	1	1	0.747933884	0.252066116	1	0.747933884	0.855791962	0.954852824	0.045147176	0.685923515	0.925356751	0.787850467
341	1	0	1	1	1	0.747933884	0.252066116	1	0.747933884	0.855791962	0.954852824	0.045147176	0.685923515	0.925356751	0.787850467
341	1	0	1	1	1	0.747933884	0.252066116	1	0.747933884	0.855791962	0.954852824	0.045147176	0.685923515	0.925356751	0.787850467
341	1	0	1	1	1	0.747933884	0.252066116	1	0.747933884	0.855791962	0.954852824	0.045147176	0.685923515	0.925356751	0.787850467
341	1	0	1	1	1	0.747933884	0.252066116	1	0.747933884	0.855791962	0.954852824	0.045147176	0.685923515	0.925356751	0.787850467
341	1	0	1	1	1	0.747933884	0.252066116	1	0.747933884	0.855791962	0.954852824	0.045147176	0.685923515	0.925356751	0.787850467
341	1	0	1	1	1	0.747933884	0.252066116	1	0.747933884	0.855791962	0.954852824	0.045147176	0.685923515	0.925356751	0.787850467
341	1	0	1	1	1	0.747933884	0.252066116	1	0.747933884	0.855791962	0.954852824	0.045147176	0.685923515	0.925356751	0.787850467
341	1	0	1	1	1	0.747933884	0.252066116	1	0.747933884	0.855791962	0.954852824	0.045147176	0.685923515	0.925356751	0.787850467
341	1	0	1	1	1	0.747933884	0.252066116	1	0.747933884	0.855791962	0.954852824	0.045147176	0.685923515	0.925356751	0.787850467
341	1	0	1	1	1	0.747933884	0.252066116	1	0.747933884	0.855791962	0.954852824	0.045147176	0.685923515	0.925356751	0.787850467
341	1	0	1	1	1	0.747933884	0.252066116	1	0.747933884	0.855791962	0.954852824	0.045147176	0.685923515	0.925356751	0.787850467
341	1	0	1	1	1	0.747933884	0.252066116	1	0.747933884	0.855791962	0.954852824	0.045147176	0.685923515	0.925356751	0.787850467
341	1	0	1	1	1	0.747933884	0.252066116	1	0.747933884	0.855791962	0.954852824	0.045147176	0.685923515	0.925356751	0.787850467
341	1	0	1	1	1	0.747933884	0.252066116	1	0.747933884	0.855791962	0.954852824	0.045147176	0.685923515	0.925356751	0.787850467
341	1	0	1	1	1	0.747933884	0.252066116	1	0.747933884	0.855791962	0.954852824	0.045147176	0.685923515	0.925356751	0.787850467
341	1	0	1	1	1	0.747933884	0.252066116	1	0.747933884	0.855791962	0.954852824	0.045147176	0.685923515	0.925356751	0.787850467
341	1	0	1	1	1	0.747933884	0.252066116	1	0.747933884	0.855791962	0.954852824	0.045147176	0.685923515	0.925356751	0.787850467
341	1	0	1	1	1	0.747933884	0.252066116	1	0.747933884	0.855791962	0.954852824	0.045147176	0.685923515	0.925356751	0.787850467
341	1	0	1	1	1	0.747933884	0.252066116	1	0.747933884	0.855791962	0.954852824	0.045147176	0.685923515	0.925356751	0.787850467
341	1	0	1	1	1	0.747933884	0.252066116	1	0.747933884	0.855791962	0.954852824	0.045147176	0.685923515	0.925356751	0.787850467
341	1	0	1	1	1	0.747933884	0.252066116	1	0.747933884	0.855791962	0.954852824	0.045147176	0.685923515	0.925356751	0.787850467
341	1	0	1	1	1	0.747933884	0.252066116	1	0.747933884	0.855791962	0.954852824	0.045147176	0.685923515	0.925356751	0.787850467
341	1	0	1	1	1	0.747933884	0.252066116	1	0.747933884	0.855791962	0.954852824	0.045147176	0.685923515	0.925356751	0.787850467
341	1	0	1	1	1	0.747933884	0.252066116	1	0.747933884	0.855791962	0.954852824	0.045147176	0.685923515	0.925356751	0.787850467
341	1	0	1	1	1	0.747933884	0.252066116	1	0.747933884	0.855791962	0.954852824	0.045147176	0.685923515	0.925356751	0.787850467
341	1	0	1	1	1	0.747933884	0.252066116	1	0.747933884	0.855791962	0.954852824	0.045147176	0.685923515	0.925356751	0.787850467
341	1	0	1	1	1	0.747933884	0.252066116	1	0.747933884	0.855791962	0.954852824	0.045147176	0.685923515	0.925356751	0.787850467
341	1	0	1	1	1	0.747933884	0.252066116	1	0.747933884	0.855791962	0.954852824	0.045147176	0.685923515	0.925356751	0.787850467
341	1	0	1	1	1	0.747933884	0.252066116	1	0.747933884	0.855791962	0.954852824	0.045147176	0.685923515	0.925356751	0.787850467
341	1	0	1	1	1	0.747933884	0.252066116	1	0.747933884	0.855791962	0.954852824	0.045147176	0.685923515	0.925356751	0.787850467
341	1	0	1	1	1	0.747933884	0.252066116	1	0.747933884	0.855791962	0.954852824	0.045147176	0.685923515	0.925356751	0.787850467
341	1	0	1	1	1	0.747933884	0.252066116	1	0.747933884	0.855791962	0.954852824	0.045147176	0.685923515	0.925356751	0.787850467
341	1	0	1	1	1	0.747933884	0.252066116	1	0.747933884	0.855791962	0.954852824	0.045147176	0.685923515	0.925356751	0.787850467
