# Supplementary material for: An Improved Hybrid Feature Selection Algorithm for Electric Charge Recovery Risk
Source: Hindawi journal article supplement (doi:10.1155/2020/8479341), 2020-08-28
Supplement: f1 [file 8479341.f1.zip › 8479341.f1/Experimental Results/201806/BGWO_results.csv]

features_num	Accuracy_high	Loss_high	Precission_high	Recall_high	F1_high	Accuracy_med	Loss_med	Precission_med	Recall_med	F1_med	Accuracy_low	Loss_low	Precission_low	Recall_low	F1_low
288	1	0	1	1	1	0.82426405	0.17573595	0.8855359	0.907249467	0.89626119	0.7953034529999999	0.20469654699999998	0.150294251	0.9120879120000001	0.258064516
288	1	0	1	1	1	0.82426405	0.17573595	0.8855359	0.907249467	0.89626119	0.7953034529999999	0.20469654699999998	0.150294251	0.9120879120000001	0.258064516
324	1	0	1	1	1	0.7638748740000001	0.23612512600000002	0.8667481659999999	0.850119904	0.8583535109999999	0.860556084	0.139443916	0.24911242600000003	0.893842887	0.389634429
300	1	0	1	1	1	0.683246073	0.316753927	0.821678322	0.770491803	0.795262267	0.8790505270000001	0.120949473	0.455228554	0.670046083	0.542132737
289	1	0	1	1	1	0.835325365	0.164674635	0.965408805	0.8575418990000001	0.9082840240000001	0.903212605	0.096787395	0.40331491700000005	0.876876877	0.552507096
289	1	0	1	1	1	0.835325365	0.164674635	0.965408805	0.8575418990000001	0.9082840240000001	0.903212605	0.096787395	0.40331491700000005	0.876876877	0.552507096
289	1	0	1	1	1	0.835325365	0.164674635	0.965408805	0.8575418990000001	0.9082840240000001	0.903212605	0.096787395	0.40331491700000005	0.876876877	0.552507096
289	1	0	1	1	1	0.835325365	0.164674635	0.965408805	0.8575418990000001	0.9082840240000001	0.903212605	0.096787395	0.40331491700000005	0.876876877	0.552507096
289	1	0	1	1	1	0.835325365	0.164674635	0.965408805	0.8575418990000001	0.9082840240000001	0.903212605	0.096787395	0.40331491700000005	0.876876877	0.552507096
289	1	0	1	1	1	0.835325365	0.164674635	0.965408805	0.8575418990000001	0.9082840240000001	0.903212605	0.096787395	0.40331491700000005	0.876876877	0.552507096
289	1	0	1	1	1	0.835325365	0.164674635	0.965408805	0.8575418990000001	0.9082840240000001	0.903212605	0.096787395	0.40331491700000005	0.876876877	0.552507096
289	1	0	1	1	1	0.835325365	0.164674635	0.965408805	0.8575418990000001	0.9082840240000001	0.903212605	0.096787395	0.40331491700000005	0.876876877	0.552507096
289	1	0	1	1	1	0.835325365	0.164674635	0.965408805	0.8575418990000001	0.9082840240000001	0.903212605	0.096787395	0.40331491700000005	0.876876877	0.552507096
289	1	0	1	1	1	0.835325365	0.164674635	0.965408805	0.8575418990000001	0.9082840240000001	0.903212605	0.096787395	0.40331491700000005	0.876876877	0.552507096
337	1	0	1	1	1	0.753986333	0.246013667	0.901129944	0.81377551	0.855227882	0.907361538	0.09263846199999999	0.521216407	0.740703518	0.6118721460000001
337	1	0	1	1	1	0.753986333	0.246013667	0.901129944	0.81377551	0.855227882	0.907361538	0.09263846199999999	0.521216407	0.740703518	0.6118721460000001
337	1	0	1	1	1	0.753986333	0.246013667	0.901129944	0.81377551	0.855227882	0.907361538	0.09263846199999999	0.521216407	0.740703518	0.6118721460000001
337	1	0	1	1	1	0.753986333	0.246013667	0.901129944	0.81377551	0.855227882	0.907361538	0.09263846199999999	0.521216407	0.740703518	0.6118721460000001
337	1	0	1	1	1	0.753986333	0.246013667	0.901129944	0.81377551	0.855227882	0.907361538	0.09263846199999999	0.521216407	0.740703518	0.6118721460000001
337	1	0	1	1	1	0.753986333	0.246013667	0.901129944	0.81377551	0.855227882	0.907361538	0.09263846199999999	0.521216407	0.740703518	0.6118721460000001
337	1	0	1	1	1	0.753986333	0.246013667	0.901129944	0.81377551	0.855227882	0.907361538	0.09263846199999999	0.521216407	0.740703518	0.6118721460000001
337	1	0	1	1	1	0.753986333	0.246013667	0.901129944	0.81377551	0.855227882	0.907361538	0.09263846199999999	0.521216407	0.740703518	0.6118721460000001
337	1	0	1	1	1	0.753986333	0.246013667	0.901129944	0.81377551	0.855227882	0.907361538	0.09263846199999999	0.521216407	0.740703518	0.6118721460000001
337	1	0	1	1	1	0.753986333	0.246013667	0.901129944	0.81377551	0.855227882	0.907361538	0.09263846199999999	0.521216407	0.740703518	0.6118721460000001
337	1	0	1	1	1	0.753986333	0.246013667	0.901129944	0.81377551	0.855227882	0.907361538	0.09263846199999999	0.521216407	0.740703518	0.6118721460000001
337	1	0	1	1	1	0.753986333	0.246013667	0.901129944	0.81377551	0.855227882	0.907361538	0.09263846199999999	0.521216407	0.740703518	0.6118721460000001
337	1	0	1	1	1	0.753986333	0.246013667	0.901129944	0.81377551	0.855227882	0.907361538	0.09263846199999999	0.521216407	0.740703518	0.6118721460000001
337	1	0	1	1	1	0.753986333	0.246013667	0.901129944	0.81377551	0.855227882	0.907361538	0.09263846199999999	0.521216407	0.740703518	0.6118721460000001
337	1	0	1	1	1	0.753986333	0.246013667	0.901129944	0.81377551	0.855227882	0.907361538	0.09263846199999999	0.521216407	0.740703518	0.6118721460000001
337	1	0	1	1	1	0.753986333	0.246013667	0.901129944	0.81377551	0.855227882	0.907361538	0.09263846199999999	0.521216407	0.740703518	0.6118721460000001
337	1	0	1	1	1	0.753986333	0.246013667	0.901129944	0.81377551	0.855227882	0.907361538	0.09263846199999999	0.521216407	0.740703518	0.6118721460000001
337	1	0	1	1	1	0.753986333	0.246013667	0.901129944	0.81377551	0.855227882	0.907361538	0.09263846199999999	0.521216407	0.740703518	0.6118721460000001
337	1	0	1	1	1	0.753986333	0.246013667	0.901129944	0.81377551	0.855227882	0.907361538	0.09263846199999999	0.521216407	0.740703518	0.6118721460000001
337	1	0	1	1	1	0.753986333	0.246013667	0.901129944	0.81377551	0.855227882	0.907361538	0.09263846199999999	0.521216407	0.740703518	0.6118721460000001
337	1	0	1	1	1	0.753986333	0.246013667	0.901129944	0.81377551	0.855227882	0.907361538	0.09263846199999999	0.521216407	0.740703518	0.6118721460000001
337	1	0	1	1	1	0.753986333	0.246013667	0.901129944	0.81377551	0.855227882	0.907361538	0.09263846199999999	0.521216407	0.740703518	0.6118721460000001
337	1	0	1	1	1	0.753986333	0.246013667	0.901129944	0.81377551	0.855227882	0.907361538	0.09263846199999999	0.521216407	0.740703518	0.6118721460000001
342	1	0	1	1	1	0.7983193279999999	0.201680672	0.87768595	0.8835274540000001	0.880597015	0.914081633	0.085918367	0.471183801	0.787760417	0.589668616
342	1	0	1	1	1	0.7983193279999999	0.201680672	0.87768595	0.8835274540000001	0.880597015	0.914081633	0.085918367	0.471183801	0.787760417	0.589668616
342	1	0	1	1	1	0.7983193279999999	0.201680672	0.87768595	0.8835274540000001	0.880597015	0.914081633	0.085918367	0.471183801	0.787760417	0.589668616
342	1	0	1	1	1	0.7983193279999999	0.201680672	0.87768595	0.8835274540000001	0.880597015	0.914081633	0.085918367	0.471183801	0.787760417	0.589668616
342	1	0	1	1	1	0.7983193279999999	0.201680672	0.87768595	0.8835274540000001	0.880597015	0.914081633	0.085918367	0.471183801	0.787760417	0.589668616
342	1	0	1	1	1	0.7983193279999999	0.201680672	0.87768595	0.8835274540000001	0.880597015	0.914081633	0.085918367	0.471183801	0.787760417	0.589668616
342	1	0	1	1	1	0.7983193279999999	0.201680672	0.87768595	0.8835274540000001	0.880597015	0.914081633	0.085918367	0.471183801	0.787760417	0.589668616
342	1	0	1	1	1	0.7983193279999999	0.201680672	0.87768595	0.8835274540000001	0.880597015	0.914081633	0.085918367	0.471183801	0.787760417	0.589668616
301	1	0	1	1	1	0.813984169	0.18601583100000002	0.9918032790000001	0.816464238	0.895632865	0.923958653	0.076041347	0.458263773	0.853810264	0.596414992
301	1	0	1	1	1	0.813984169	0.18601583100000002	0.9918032790000001	0.816464238	0.895632865	0.923958653	0.076041347	0.458263773	0.853810264	0.596414992
301	1	0	1	1	1	0.813984169	0.18601583100000002	0.9918032790000001	0.816464238	0.895632865	0.923958653	0.076041347	0.458263773	0.853810264	0.596414992
301	1	0	1	1	1	0.813984169	0.18601583100000002	0.9918032790000001	0.816464238	0.895632865	0.923958653	0.076041347	0.458263773	0.853810264	0.596414992
301	1	0	1	1	1	0.813984169	0.18601583100000002	0.9918032790000001	0.816464238	0.895632865	0.923958653	0.076041347	0.458263773	0.853810264	0.596414992
301	1	0	1	1	1	0.813984169	0.18601583100000002	0.9918032790000001	0.816464238	0.895632865	0.923958653	0.076041347	0.458263773	0.853810264	0.596414992
301	1	0	1	1	1	0.813984169	0.18601583100000002	0.9918032790000001	0.816464238	0.895632865	0.923958653	0.076041347	0.458263773	0.853810264	0.596414992
301	1	0	1	1	1	0.813984169	0.18601583100000002	0.9918032790000001	0.816464238	0.895632865	0.923958653	0.076041347	0.458263773	0.853810264	0.596414992
301	1	0	1	1	1	0.813984169	0.18601583100000002	0.9918032790000001	0.816464238	0.895632865	0.923958653	0.076041347	0.458263773	0.853810264	0.596414992
301	1	0	1	1	1	0.813984169	0.18601583100000002	0.9918032790000001	0.816464238	0.895632865	0.923958653	0.076041347	0.458263773	0.853810264	0.596414992
301	1	0	1	1	1	0.813984169	0.18601583100000002	0.9918032790000001	0.816464238	0.895632865	0.923958653	0.076041347	0.458263773	0.853810264	0.596414992
301	1	0	1	1	1	0.813984169	0.18601583100000002	0.9918032790000001	0.816464238	0.895632865	0.923958653	0.076041347	0.458263773	0.853810264	0.596414992
301	1	0	1	1	1	0.813984169	0.18601583100000002	0.9918032790000001	0.816464238	0.895632865	0.923958653	0.076041347	0.458263773	0.853810264	0.596414992
301	1	0	1	1	1	0.813984169	0.18601583100000002	0.9918032790000001	0.816464238	0.895632865	0.923958653	0.076041347	0.458263773	0.853810264	0.596414992
301	1	0	1	1	1	0.813984169	0.18601583100000002	0.9918032790000001	0.816464238	0.895632865	0.923958653	0.076041347	0.458263773	0.853810264	0.596414992
301	1	0	1	1	1	0.813984169	0.18601583100000002	0.9918032790000001	0.816464238	0.895632865	0.923958653	0.076041347	0.458263773	0.853810264	0.596414992
301	1	0	1	1	1	0.813984169	0.18601583100000002	0.9918032790000001	0.816464238	0.895632865	0.923958653	0.076041347	0.458263773	0.853810264	0.596414992
301	1	0	1	1	1	0.813984169	0.18601583100000002	0.9918032790000001	0.816464238	0.895632865	0.923958653	0.076041347	0.458263773	0.853810264	0.596414992
301	1	0	1	1	1	0.813984169	0.18601583100000002	0.9918032790000001	0.816464238	0.895632865	0.923958653	0.076041347	0.458263773	0.853810264	0.596414992
353	1	0	1	1	1	0.800884956	0.199115044	0.926701571	0.850961538	0.887218045	0.9121728790000001	0.087827121	0.536527887	0.6976506640000001	0.606571936
353	1	0	1	1	1	0.800884956	0.199115044	0.926701571	0.850961538	0.887218045	0.9121728790000001	0.087827121	0.536527887	0.6976506640000001	0.606571936
353	1	0	1	1	1	0.800884956	0.199115044	0.926701571	0.850961538	0.887218045	0.9121728790000001	0.087827121	0.536527887	0.6976506640000001	0.606571936
353	1	0	1	1	1	0.800884956	0.199115044	0.926701571	0.850961538	0.887218045	0.9121728790000001	0.087827121	0.536527887	0.6976506640000001	0.606571936
353	1	0	1	1	1	0.800884956	0.199115044	0.926701571	0.850961538	0.887218045	0.9121728790000001	0.087827121	0.536527887	0.6976506640000001	0.606571936
353	1	0	1	1	1	0.800884956	0.199115044	0.926701571	0.850961538	0.887218045	0.9121728790000001	0.087827121	0.536527887	0.6976506640000001	0.606571936
353	1	0	1	1	1	0.800884956	0.199115044	0.926701571	0.850961538	0.887218045	0.9121728790000001	0.087827121	0.536527887	0.6976506640000001	0.606571936
353	1	0	1	1	1	0.800884956	0.199115044	0.926701571	0.850961538	0.887218045	0.9121728790000001	0.087827121	0.536527887	0.6976506640000001	0.606571936
353	1	0	1	1	1	0.800884956	0.199115044	0.926701571	0.850961538	0.887218045	0.9121728790000001	0.087827121	0.536527887	0.6976506640000001	0.606571936
353	1	0	1	1	1	0.800884956	0.199115044	0.926701571	0.850961538	0.887218045	0.9121728790000001	0.087827121	0.536527887	0.6976506640000001	0.606571936
353	1	0	1	1	1	0.800884956	0.199115044	0.926701571	0.850961538	0.887218045	0.9121728790000001	0.087827121	0.536527887	0.6976506640000001	0.606571936
353	1	0	1	1	1	0.800884956	0.199115044	0.926701571	0.850961538	0.887218045	0.9121728790000001	0.087827121	0.536527887	0.6976506640000001	0.606571936
353	1	0	1	1	1	0.800884956	0.199115044	0.926701571	0.850961538	0.887218045	0.9121728790000001	0.087827121	0.536527887	0.6976506640000001	0.606571936
353	1	0	1	1	1	0.800884956	0.199115044	0.926701571	0.850961538	0.887218045	0.9121728790000001	0.087827121	0.536527887	0.6976506640000001	0.606571936
309	1	0	1	1	1	0.8152350079999999	0.184764992	0.9547244090000001	0.8420138890000001	0.8948339479999999	0.918414683	0.081585317	0.501174628	0.78817734	0.612733365
309	1	0	1	1	1	0.8152350079999999	0.184764992	0.9547244090000001	0.8420138890000001	0.8948339479999999	0.918414683	0.081585317	0.501174628	0.78817734	0.612733365
309	1	0	1	1	1	0.8152350079999999	0.184764992	0.9547244090000001	0.8420138890000001	0.8948339479999999	0.918414683	0.081585317	0.501174628	0.78817734	0.612733365
309	1	0	1	1	1	0.8152350079999999	0.184764992	0.9547244090000001	0.8420138890000001	0.8948339479999999	0.918414683	0.081585317	0.501174628	0.78817734	0.612733365
309	1	0	1	1	1	0.8152350079999999	0.184764992	0.9547244090000001	0.8420138890000001	0.8948339479999999	0.918414683	0.081585317	0.501174628	0.78817734	0.612733365
309	1	0	1	1	1	0.8152350079999999	0.184764992	0.9547244090000001	0.8420138890000001	0.8948339479999999	0.918414683	0.081585317	0.501174628	0.78817734	0.612733365
328	1	0	1	1	1	0.838141026	0.16185897400000002	0.996146435	0.8392857140000001	0.911013216	0.9253731340000001	0.074626866	0.514306676	0.89987163	0.654528478
328	1	0	1	1	1	0.838141026	0.16185897400000002	0.996146435	0.8392857140000001	0.911013216	0.9253731340000001	0.074626866	0.514306676	0.89987163	0.654528478
328	1	0	1	1	1	0.838141026	0.16185897400000002	0.996146435	0.8392857140000001	0.911013216	0.9253731340000001	0.074626866	0.514306676	0.89987163	0.654528478
328	1	0	1	1	1	0.838141026	0.16185897400000002	0.996146435	0.8392857140000001	0.911013216	0.9253731340000001	0.074626866	0.514306676	0.89987163	0.654528478
328	1	0	1	1	1	0.838141026	0.16185897400000002	0.996146435	0.8392857140000001	0.911013216	0.9253731340000001	0.074626866	0.514306676	0.89987163	0.654528478
328	1	0	1	1	1	0.838141026	0.16185897400000002	0.996146435	0.8392857140000001	0.911013216	0.9253731340000001	0.074626866	0.514306676	0.89987163	0.654528478
328	1	0	1	1	1	0.838141026	0.16185897400000002	0.996146435	0.8392857140000001	0.911013216	0.9253731340000001	0.074626866	0.514306676	0.89987163	0.654528478
328	1	0	1	1	1	0.838141026	0.16185897400000002	0.996146435	0.8392857140000001	0.911013216	0.9253731340000001	0.074626866	0.514306676	0.89987163	0.654528478
328	1	0	1	1	1	0.838141026	0.16185897400000002	0.996146435	0.8392857140000001	0.911013216	0.9253731340000001	0.074626866	0.514306676	0.89987163	0.654528478
328	1	0	1	1	1	0.838141026	0.16185897400000002	0.996146435	0.8392857140000001	0.911013216	0.9253731340000001	0.074626866	0.514306676	0.89987163	0.654528478
328	1	0	1	1	1	0.838141026	0.16185897400000002	0.996146435	0.8392857140000001	0.911013216	0.9253731340000001	0.074626866	0.514306676	0.89987163	0.654528478
328	1	0	1	1	1	0.838141026	0.16185897400000002	0.996146435	0.8392857140000001	0.911013216	0.9253731340000001	0.074626866	0.514306676	0.89987163	0.654528478
328	1	0	1	1	1	0.838141026	0.16185897400000002	0.996146435	0.8392857140000001	0.911013216	0.9253731340000001	0.074626866	0.514306676	0.89987163	0.654528478
328	1	0	1	1	1	0.838141026	0.16185897400000002	0.996146435	0.8392857140000001	0.911013216	0.9253731340000001	0.074626866	0.514306676	0.89987163	0.654528478
328	1	0	1	1	1	0.838141026	0.16185897400000002	0.996146435	0.8392857140000001	0.911013216	0.9253731340000001	0.074626866	0.514306676	0.89987163	0.654528478
328	1	0	1	1	1	0.838141026	0.16185897400000002	0.996146435	0.8392857140000001	0.911013216	0.9253731340000001	0.074626866	0.514306676	0.89987163	0.654528478
