# Supplementary material for: An Improved Hybrid Feature Selection Algorithm for Electric Charge Recovery Risk
Source: Hindawi journal article supplement (doi:10.1155/2020/8479341), 2020-08-28
Supplement: f1 [file 8479341.f1.zip › 8479341.f1/Experimental Results/201806/BGWO_SBS_results.csv]

features_num	Accuracy_high	Loss_high	Precission_high	Recall_high	F1_high	Accuracy_med	Loss_med	Precission_med	Recall_med	F1_med	Accuracy_low	Loss_low	Precission_low	Recall_low	F1_low
328	1	0	1	1	1	0.838141026	0.161858974	0.996146435	0.839285714	0.911013216	0.92517144	0.07482856	0.513553114	0.89987163	0.65391791
328	1	0	1	1	1	0.838141026	0.161858974	0.996146435	0.839285714	0.911013216	0.92517144	0.07482856	0.513553114	0.89987163	0.65391791
328	1	0	1	1	1	0.838141026	0.161858974	0.996146435	0.839285714	0.911013216	0.92517144	0.07482856	0.513553114	0.89987163	0.65391791
327	1	0	1	1	1	0.83788122	0.16211878	0.996146435	0.839285714	0.911013216	0.925178986	0.074821014	0.513553114	0.89987163	0.65391791
327	1	0	1	1	1	0.83788122	0.16211878	0.996146435	0.839285714	0.911013216	0.925178986	0.074821014	0.513553114	0.89987163	0.65391791
326	1	0	1	1	1	0.838141026	0.161858974	0.996146435	0.839285714	0.911013216	0.925272287	0.074727713	0.513929619	0.89987163	0.654223052
326	1	0	1	1	1	0.838141026	0.161858974	0.996146435	0.839285714	0.911013216	0.925272287	0.074727713	0.513929619	0.89987163	0.654223052
326	1	0	1	1	1	0.838141026	0.161858974	0.996146435	0.839285714	0.911013216	0.925272287	0.074727713	0.513929619	0.89987163	0.654223052
326	1	0	1	1	1	0.838141026	0.161858974	0.996146435	0.839285714	0.911013216	0.925272287	0.074727713	0.513929619	0.89987163	0.654223052
326	1	0	1	1	1	0.838141026	0.161858974	0.996146435	0.839285714	0.911013216	0.925272287	0.074727713	0.513929619	0.89987163	0.654223052
326	1	0	1	1	1	0.838141026	0.161858974	0.996146435	0.839285714	0.911013216	0.925272287	0.074727713	0.513929619	0.89987163	0.654223052
325	1	0	1	1	1	0.838141026	0.161858974	0.996146435	0.839285714	0.911013216	0.925373134	0.074626866	0.514306676	0.89987163	0.654528478
325	1	0	1	1	1	0.838141026	0.161858974	0.996146435	0.839285714	0.911013216	0.925373134	0.074626866	0.514306676	0.89987163	0.654528478
325	1	0	1	1	1	0.838141026	0.161858974	0.996146435	0.839285714	0.911013216	0.925373134	0.074626866	0.514306676	0.89987163	0.654528478
325	1	0	1	1	1	0.838141026	0.161858974	0.996146435	0.839285714	0.911013216	0.925373134	0.074626866	0.514306676	0.89987163	0.654528478
325	1	0	1	1	1	0.838141026	0.161858974	0.996146435	0.839285714	0.911013216	0.925373134	0.074626866	0.514306676	0.89987163	0.654528478
324	1	0	1	1	1	0.838141026	0.161858974	0.996146435	0.839285714	0.911013216	0.925373134	0.074626866	0.514306676	0.89987163	0.654528478
323	1	0	1	1	1	0.838141026	0.161858974	0.996146435	0.839285714	0.911013216	0.925373134	0.074626866	0.514306676	0.89987163	0.654528478
323	1	0	1	1	1	0.838141026	0.161858974	0.996146435	0.839285714	0.911013216	0.925373134	0.074626866	0.514306676	0.89987163	0.654528478
323	1	0	1	1	1	0.838141026	0.161858974	0.996146435	0.839285714	0.911013216	0.925373134	0.074626866	0.514306676	0.89987163	0.654528478
322	1	0	1	1	1	0.8416	0.1584	0.996168582	0.842787682	0.913081651	0.92526475	0.07473525	0.513573001	0.899742931	0.653900047
322	1	0	1	1	1	0.8416	0.1584	0.996168582	0.842787682	0.913081651	0.92526475	0.07473525	0.513573001	0.899742931	0.653900047
322	1	0	1	1	1	0.8416	0.1584	0.996168582	0.842787682	0.913081651	0.92526475	0.07473525	0.513573001	0.899742931	0.653900047
322	1	0	1	1	1	0.8416	0.1584	0.996168582	0.842787682	0.913081651	0.92526475	0.07473525	0.513573001	0.899742931	0.653900047
322	1	0	1	1	1	0.8416	0.1584	0.996168582	0.842787682	0.913081651	0.92526475	0.07473525	0.513573001	0.899742931	0.653900047
322	1	0	1	1	1	0.8416	0.1584	0.996168582	0.842787682	0.913081651	0.92526475	0.07473525	0.513573001	0.899742931	0.653900047
322	1	0	1	1	1	0.8416	0.1584	0.996168582	0.842787682	0.913081651	0.92526475	0.07473525	0.513573001	0.899742931	0.653900047
322	1	0	1	1	1	0.8416	0.1584	0.996168582	0.842787682	0.913081651	0.92526475	0.07473525	0.513573001	0.899742931	0.653900047
322	1	0	1	1	1	0.8416	0.1584	0.996168582	0.842787682	0.913081651	0.92526475	0.07473525	0.513573001	0.899742931	0.653900047
322	1	0	1	1	1	0.8416	0.1584	0.996168582	0.842787682	0.913081651	0.92526475	0.07473525	0.513573001	0.899742931	0.653900047
322	1	0	1	1	1	0.8416	0.1584	0.996168582	0.842787682	0.913081651	0.92526475	0.07473525	0.513573001	0.899742931	0.653900047
322	1	0	1	1	1	0.8416	0.1584	0.996168582	0.842787682	0.913081651	0.92526475	0.07473525	0.513573001	0.899742931	0.653900047
322	1	0	1	1	1	0.8416	0.1584	0.996168582	0.842787682	0.913081651	0.92526475	0.07473525	0.513573001	0.899742931	0.653900047
322	1	0	1	1	1	0.8416	0.1584	0.996168582	0.842787682	0.913081651	0.92526475	0.07473525	0.513573001	0.899742931	0.653900047
322	1	0	1	1	1	0.8416	0.1584	0.996168582	0.842787682	0.913081651	0.92526475	0.07473525	0.513573001	0.899742931	0.653900047
321	1	0	1	1	1	0.841346154	0.158653846	0.996161228	0.842532468	0.91292876	0.925272287	0.074727713	0.513929619	0.89987163	0.654223052
321	1	0	1	1	1	0.841346154	0.158653846	0.996161228	0.842532468	0.91292876	0.925272287	0.074727713	0.513929619	0.89987163	0.654223052
321	1	0	1	1	1	0.841346154	0.158653846	0.996161228	0.842532468	0.91292876	0.925272287	0.074727713	0.513929619	0.89987163	0.654223052
321	1	0	1	1	1	0.841346154	0.158653846	0.996161228	0.842532468	0.91292876	0.925272287	0.074727713	0.513929619	0.89987163	0.654223052
321	1	0	1	1	1	0.841346154	0.158653846	0.996161228	0.842532468	0.91292876	0.925272287	0.074727713	0.513929619	0.89987163	0.654223052
321	1	0	1	1	1	0.841346154	0.158653846	0.996161228	0.842532468	0.91292876	0.925272287	0.074727713	0.513929619	0.89987163	0.654223052
321	1	0	1	1	1	0.841346154	0.158653846	0.996161228	0.842532468	0.91292876	0.925272287	0.074727713	0.513929619	0.89987163	0.654223052
321	1	0	1	1	1	0.841346154	0.158653846	0.996161228	0.842532468	0.91292876	0.925272287	0.074727713	0.513929619	0.89987163	0.654223052
321	1	0	1	1	1	0.841346154	0.158653846	0.996161228	0.842532468	0.91292876	0.925272287	0.074727713	0.513929619	0.89987163	0.654223052
321	1	0	1	1	1	0.841346154	0.158653846	0.996161228	0.842532468	0.91292876	0.925272287	0.074727713	0.513929619	0.89987163	0.654223052
321	1	0	1	1	1	0.841346154	0.158653846	0.996161228	0.842532468	0.91292876	0.925272287	0.074727713	0.513929619	0.89987163	0.654223052
321	1	0	1	1	1	0.841346154	0.158653846	0.996161228	0.842532468	0.91292876	0.925272287	0.074727713	0.513929619	0.89987163	0.654223052
321	1	0	1	1	1	0.841346154	0.158653846	0.996161228	0.842532468	0.91292876	0.925272287	0.074727713	0.513929619	0.89987163	0.654223052
321	1	0	1	1	1	0.841346154	0.158653846	0.996161228	0.842532468	0.91292876	0.925272287	0.074727713	0.513929619	0.89987163	0.654223052
321	1	0	1	1	1	0.841346154	0.158653846	0.996161228	0.842532468	0.91292876	0.925272287	0.074727713	0.513929619	0.89987163	0.654223052
321	1	0	1	1	1	0.841346154	0.158653846	0.996161228	0.842532468	0.91292876	0.925272287	0.074727713	0.513929619	0.89987163	0.654223052
321	1	0	1	1	1	0.841346154	0.158653846	0.996161228	0.842532468	0.91292876	0.925272287	0.074727713	0.513929619	0.89987163	0.654223052
321	1	0	1	1	1	0.841346154	0.158653846	0.996161228	0.842532468	0.91292876	0.925272287	0.074727713	0.513929619	0.89987163	0.654223052
321	1	0	1	1	1	0.841346154	0.158653846	0.996161228	0.842532468	0.91292876	0.925272287	0.074727713	0.513929619	0.89987163	0.654223052
321	1	0	1	1	1	0.841346154	0.158653846	0.996161228	0.842532468	0.91292876	0.925272287	0.074727713	0.513929619	0.89987163	0.654223052
320	1	0	1	1	1	0.8432	0.1568	0.996175908	0.844408428	0.914035088	0.92526475	0.07473525	0.513573001	0.899742931	0.653900047
320	1	0	1	1	1	0.8432	0.1568	0.996175908	0.844408428	0.914035088	0.92526475	0.07473525	0.513573001	0.899742931	0.653900047
320	1	0	1	1	1	0.8432	0.1568	0.996175908	0.844408428	0.914035088	0.92526475	0.07473525	0.513573001	0.899742931	0.653900047
320	1	0	1	1	1	0.8432	0.1568	0.996175908	0.844408428	0.914035088	0.92526475	0.07473525	0.513573001	0.899742931	0.653900047
320	1	0	1	1	1	0.8432	0.1568	0.996175908	0.844408428	0.914035088	0.92526475	0.07473525	0.513573001	0.899742931	0.653900047
320	1	0	1	1	1	0.8432	0.1568	0.996175908	0.844408428	0.914035088	0.92526475	0.07473525	0.513573001	0.899742931	0.653900047
320	1	0	1	1	1	0.8432	0.1568	0.996175908	0.844408428	0.914035088	0.92526475	0.07473525	0.513573001	0.899742931	0.653900047
320	1	0	1	1	1	0.8432	0.1568	0.996175908	0.844408428	0.914035088	0.92526475	0.07473525	0.513573001	0.899742931	0.653900047
320	1	0	1	1	1	0.8432	0.1568	0.996175908	0.844408428	0.914035088	0.92526475	0.07473525	0.513573001	0.899742931	0.653900047
320	1	0	1	1	1	0.8432	0.1568	0.996175908	0.844408428	0.914035088	0.92526475	0.07473525	0.513573001	0.899742931	0.653900047
320	1	0	1	1	1	0.8432	0.1568	0.996175908	0.844408428	0.914035088	0.92526475	0.07473525	0.513573001	0.899742931	0.653900047
320	1	0	1	1	1	0.8432	0.1568	0.996175908	0.844408428	0.914035088	0.92526475	0.07473525	0.513573001	0.899742931	0.653900047
320	1	0	1	1	1	0.8432	0.1568	0.996175908	0.844408428	0.914035088	0.92526475	0.07473525	0.513573001	0.899742931	0.653900047
320	1	0	1	1	1	0.8432	0.1568	0.996175908	0.844408428	0.914035088	0.92526475	0.07473525	0.513573001	0.899742931	0.653900047
320	1	0	1	1	1	0.8432	0.1568	0.996175908	0.844408428	0.914035088	0.92526475	0.07473525	0.513573001	0.899742931	0.653900047
320	1	0	1	1	1	0.8432	0.1568	0.996175908	0.844408428	0.914035088	0.92526475	0.07473525	0.513573001	0.899742931	0.653900047
320	1	0	1	1	1	0.8432	0.1568	0.996175908	0.844408428	0.914035088	0.92526475	0.07473525	0.513573001	0.899742931	0.653900047
320	1	0	1	1	1	0.8432	0.1568	0.996175908	0.844408428	0.914035088	0.92526475	0.07473525	0.513573001	0.899742931	0.653900047
320	1	0	1	1	1	0.8432	0.1568	0.996175908	0.844408428	0.914035088	0.92526475	0.07473525	0.513573001	0.899742931	0.653900047
320	1	0	1	1	1	0.8432	0.1568	0.996175908	0.844408428	0.914035088	0.92526475	0.07473525	0.513573001	0.899742931	0.653900047
320	1	0	1	1	1	0.8432	0.1568	0.996175908	0.844408428	0.914035088	0.92526475	0.07473525	0.513573001	0.899742931	0.653900047
320	1	0	1	1	1	0.8432	0.1568	0.996175908	0.844408428	0.914035088	0.92526475	0.07473525	0.513573001	0.899742931	0.653900047
320	1	0	1	1	1	0.8432	0.1568	0.996175908	0.844408428	0.914035088	0.92526475	0.07473525	0.513573001	0.899742931	0.653900047
320	1	0	1	1	1	0.8432	0.1568	0.996175908	0.844408428	0.914035088	0.92526475	0.07473525	0.513573001	0.899742931	0.653900047
320	1	0	1	1	1	0.8432	0.1568	0.996175908	0.844408428	0.914035088	0.92526475	0.07473525	0.513573001	0.899742931	0.653900047
320	1	0	1	1	1	0.8432	0.1568	0.996175908	0.844408428	0.914035088	0.92526475	0.07473525	0.513573001	0.899742931	0.653900047
320	1	0	1	1	1	0.8432	0.1568	0.996175908	0.844408428	0.914035088	0.92526475	0.07473525	0.513573001	0.899742931	0.653900047
320	1	0	1	1	1	0.8432	0.1568	0.996175908	0.844408428	0.914035088	0.92526475	0.07473525	0.513573001	0.899742931	0.653900047
320	1	0	1	1	1	0.8432	0.1568	0.996175908	0.844408428	0.914035088	0.92526475	0.07473525	0.513573001	0.899742931	0.653900047
320	1	0	1	1	1	0.8432	0.1568	0.996175908	0.844408428	0.914035088	0.92526475	0.07473525	0.513573001	0.899742931	0.653900047
320	1	0	1	1	1	0.8432	0.1568	0.996175908	0.844408428	0.914035088	0.92526475	0.07473525	0.513573001	0.899742931	0.653900047
320	1	0	1	1	1	0.8432	0.1568	0.996175908	0.844408428	0.914035088	0.92526475	0.07473525	0.513573001	0.899742931	0.653900047
320	1	0	1	1	1	0.8432	0.1568	0.996175908	0.844408428	0.914035088	0.92526475	0.07473525	0.513573001	0.899742931	0.653900047
320	1	0	1	1	1	0.8432	0.1568	0.996175908	0.844408428	0.914035088	0.92526475	0.07473525	0.513573001	0.899742931	0.653900047
320	1	0	1	1	1	0.8432	0.1568	0.996175908	0.844408428	0.914035088	0.92526475	0.07473525	0.513573001	0.899742931	0.653900047
320	1	0	1	1	1	0.8432	0.1568	0.996175908	0.844408428	0.914035088	0.92526475	0.07473525	0.513573001	0.899742931	0.653900047
320	1	0	1	1	1	0.8432	0.1568	0.996175908	0.844408428	0.914035088	0.92526475	0.07473525	0.513573001	0.899742931	0.653900047
320	1	0	1	1	1	0.8432	0.1568	0.996175908	0.844408428	0.914035088	0.92526475	0.07473525	0.513573001	0.899742931	0.653900047
320	1	0	1	1	1	0.8432	0.1568	0.996175908	0.844408428	0.914035088	0.92526475	0.07473525	0.513573001	0.899742931	0.653900047
320	1	0	1	1	1	0.8432	0.1568	0.996175908	0.844408428	0.914035088	0.92526475	0.07473525	0.513573001	0.899742931	0.653900047
320	1	0	1	1	1	0.8432	0.1568	0.996175908	0.844408428	0.914035088	0.92526475	0.07473525	0.513573001	0.899742931	0.653900047
320	1	0	1	1	1	0.8432	0.1568	0.996175908	0.844408428	0.914035088	0.92526475	0.07473525	0.513573001	0.899742931	0.653900047
320	1	0	1	1	1	0.8432	0.1568	0.996175908	0.844408428	0.914035088	0.92526475	0.07473525	0.513573001	0.899742931	0.653900047
320	1	0	1	1	1	0.8432	0.1568	0.996175908	0.844408428	0.914035088	0.92526475	0.07473525	0.513573001	0.899742931	0.653900047
320	1	0	1	1	1	0.8432	0.1568	0.996175908	0.844408428	0.914035088	0.92526475	0.07473525	0.513573001	0.899742931	0.653900047
320	1	0	1	1	1	0.8432	0.1568	0.996175908	0.844408428	0.914035088	0.92526475	0.07473525	0.513573001	0.899742931	0.653900047
320	1	0	1	1	1	0.8432	0.1568	0.996175908	0.844408428	0.914035088	0.92526475	0.07473525	0.513573001	0.899742931	0.653900047
320	1	0	1	1	1	0.8432	0.1568	0.996175908	0.844408428	0.914035088	0.92526475	0.07473525	0.513573001	0.899742931	0.653900047
320	1	0	1	1	1	0.8432	0.1568	0.996175908	0.844408428	0.914035088	0.92526475	0.07473525	0.513573001	0.899742931	0.653900047
320	1	0	1	1	1	0.8432	0.1568	0.996175908	0.844408428	0.914035088	0.92526475	0.07473525	0.513573001	0.899742931	0.653900047
320	1	0	1	1	1	0.8432	0.1568	0.996175908	0.844408428	0.914035088	0.92526475	0.07473525	0.513573001	0.899742931	0.653900047
320	1	0	1	1	1	0.8432	0.1568	0.996175908	0.844408428	0.914035088	0.92526475	0.07473525	0.513573001	0.899742931	0.653900047
320	1	0	1	1	1	0.8432	0.1568	0.996175908	0.844408428	0.914035088	0.92526475	0.07473525	0.513573001	0.899742931	0.653900047
320	1	0	1	1	1	0.8432	0.1568	0.996175908	0.844408428	0.914035088	0.92526475	0.07473525	0.513573001	0.899742931	0.653900047
320	1	0	1	1	1	0.8432	0.1568	0.996175908	0.844408428	0.914035088	0.92526475	0.07473525	0.513573001	0.899742931	0.653900047
320	1	0	1	1	1	0.8432	0.1568	0.996175908	0.844408428	0.914035088	0.92526475	0.07473525	0.513573001	0.899742931	0.653900047
320	1	0	1	1	1	0.8432	0.1568	0.996175908	0.844408428	0.914035088	0.92526475	0.07473525	0.513573001	0.899742931	0.653900047
320	1	0	1	1	1	0.8432	0.1568	0.996175908	0.844408428	0.914035088	0.92526475	0.07473525	0.513573001	0.899742931	0.653900047
320	1	0	1	1	1	0.8432	0.1568	0.996175908	0.844408428	0.914035088	0.92526475	0.07473525	0.513573001	0.899742931	0.653900047
320	1	0	1	1	1	0.8432	0.1568	0.996175908	0.844408428	0.914035088	0.92526475	0.07473525	0.513573001	0.899742931	0.653900047
320	1	0	1	1	1	0.8432	0.1568	0.996175908	0.844408428	0.914035088	0.92526475	0.07473525	0.513573001	0.899742931	0.653900047
320	1	0	1	1	1	0.8432	0.1568	0.996175908	0.844408428	0.914035088	0.92526475	0.07473525	0.513573001	0.899742931	0.653900047
320	1	0	1	1	1	0.8432	0.1568	0.996175908	0.844408428	0.914035088	0.92526475	0.07473525	0.513573001	0.899742931	0.653900047
320	1	0	1	1	1	0.8432	0.1568	0.996175908	0.844408428	0.914035088	0.92526475	0.07473525	0.513573001	0.899742931	0.653900047
320	1	0	1	1	1	0.8432	0.1568	0.996175908	0.844408428	0.914035088	0.92526475	0.07473525	0.513573001	0.899742931	0.653900047
320	1	0	1	1	1	0.8432	0.1568	0.996175908	0.844408428	0.914035088	0.92526475	0.07473525	0.513573001	0.899742931	0.653900047
320	1	0	1	1	1	0.8432	0.1568	0.996175908	0.844408428	0.914035088	0.92526475	0.07473525	0.513573001	0.899742931	0.653900047
320	1	0	1	1	1	0.8432	0.1568	0.996175908	0.844408428	0.914035088	0.92526475	0.07473525	0.513573001	0.899742931	0.653900047
320	1	0	1	1	1	0.8432	0.1568	0.996175908	0.844408428	0.914035088	0.92526475	0.07473525	0.513573001	0.899742931	0.653900047
320	1	0	1	1	1	0.8432	0.1568	0.996175908	0.844408428	0.914035088	0.92526475	0.07473525	0.513573001	0.899742931	0.653900047
320	1	0	1	1	1	0.8432	0.1568	0.996175908	0.844408428	0.914035088	0.92526475	0.07473525	0.513573001	0.899742931	0.653900047
320	1	0	1	1	1	0.8432	0.1568	0.996175908	0.844408428	0.914035088	0.92526475	0.07473525	0.513573001	0.899742931	0.653900047
320	1	0	1	1	1	0.8432	0.1568	0.996175908	0.844408428	0.914035088	0.92526475	0.07473525	0.513573001	0.899742931	0.653900047
320	1	0	1	1	1	0.8432	0.1568	0.996175908	0.844408428	0.914035088	0.92526475	0.07473525	0.513573001	0.899742931	0.653900047
320	1	0	1	1	1	0.8432	0.1568	0.996175908	0.844408428	0.914035088	0.92526475	0.07473525	0.513573001	0.899742931	0.653900047
320	1	0	1	1	1	0.8432	0.1568	0.996175908	0.844408428	0.914035088	0.92526475	0.07473525	0.513573001	0.899742931	0.653900047
320	1	0	1	1	1	0.8432	0.1568	0.996175908	0.844408428	0.914035088	0.92526475	0.07473525	0.513573001	0.899742931	0.653900047
320	1	0	1	1	1	0.8432	0.1568	0.996175908	0.844408428	0.914035088	0.92526475	0.07473525	0.513573001	0.899742931	0.653900047
320	1	0	1	1	1	0.8432	0.1568	0.996175908	0.844408428	0.914035088	0.92526475	0.07473525	0.513573001	0.899742931	0.653900047
320	1	0	1	1	1	0.8432	0.1568	0.996175908	0.844408428	0.914035088	0.92526475	0.07473525	0.513573001	0.899742931	0.653900047
320	1	0	1	1	1	0.8432	0.1568	0.996175908	0.844408428	0.914035088	0.92526475	0.07473525	0.513573001	0.899742931	0.653900047
320	1	0	1	1	1	0.8432	0.1568	0.996175908	0.844408428	0.914035088	0.92526475	0.07473525	0.513573001	0.899742931	0.653900047
320	1	0	1	1	1	0.8432	0.1568	0.996175908	0.844408428	0.914035088	0.92526475	0.07473525	0.513573001	0.899742931	0.653900047
320	1	0	1	1	1	0.8432	0.1568	0.996175908	0.844408428	0.914035088	0.92526475	0.07473525	0.513573001	0.899742931	0.653900047
320	1	0	1	1	1	0.8432	0.1568	0.996175908	0.844408428	0.914035088	0.92526475	0.07473525	0.513573001	0.899742931	0.653900047
320	1	0	1	1	1	0.8432	0.1568	0.996175908	0.844408428	0.914035088	0.92526475	0.07473525	0.513573001	0.899742931	0.653900047
320	1	0	1	1	1	0.8432	0.1568	0.996175908	0.844408428	0.914035088	0.92526475	0.07473525	0.513573001	0.899742931	0.653900047
320	1	0	1	1	1	0.8432	0.1568	0.996175908	0.844408428	0.914035088	0.92526475	0.07473525	0.513573001	0.899742931	0.653900047
320	1	0	1	1	1	0.8432	0.1568	0.996175908	0.844408428	0.914035088	0.92526475	0.07473525	0.513573001	0.899742931	0.653900047
320	1	0	1	1	1	0.8432	0.1568	0.996175908	0.844408428	0.914035088	0.92526475	0.07473525	0.513573001	0.899742931	0.653900047
320	1	0	1	1	1	0.8432	0.1568	0.996175908	0.844408428	0.914035088	0.92526475	0.07473525	0.513573001	0.899742931	0.653900047
320	1	0	1	1	1	0.8432	0.1568	0.996175908	0.844408428	0.914035088	0.92526475	0.07473525	0.513573001	0.899742931	0.653900047
320	1	0	1	1	1	0.8432	0.1568	0.996175908	0.844408428	0.914035088	0.92526475	0.07473525	0.513573001	0.899742931	0.653900047
320	1	0	1	1	1	0.8432	0.1568	0.996175908	0.844408428	0.914035088	0.92526475	0.07473525	0.513573001	0.899742931	0.653900047
320	1	0	1	1	1	0.8432	0.1568	0.996175908	0.844408428	0.914035088	0.92526475	0.07473525	0.513573001	0.899742931	0.653900047
320	1	0	1	1	1	0.8432	0.1568	0.996175908	0.844408428	0.914035088	0.92526475	0.07473525	0.513573001	0.899742931	0.653900047
320	1	0	1	1	1	0.8432	0.1568	0.996175908	0.844408428	0.914035088	0.92526475	0.07473525	0.513573001	0.899742931	0.653900047
320	1	0	1	1	1	0.8432	0.1568	0.996175908	0.844408428	0.914035088	0.92526475	0.07473525	0.513573001	0.899742931	0.653900047
320	1	0	1	1	1	0.8432	0.1568	0.996175908	0.844408428	0.914035088	0.92526475	0.07473525	0.513573001	0.899742931	0.653900047
320	1	0	1	1	1	0.8432	0.1568	0.996175908	0.844408428	0.914035088	0.92526475	0.07473525	0.513573001	0.899742931	0.653900047
320	1	0	1	1	1	0.8432	0.1568	0.996175908	0.844408428	0.914035088	0.92526475	0.07473525	0.513573001	0.899742931	0.653900047
320	1	0	1	1	1	0.8432	0.1568	0.996175908	0.844408428	0.914035088	0.92526475	0.07473525	0.513573001	0.899742931	0.653900047
320	1	0	1	1	1	0.8432	0.1568	0.996175908	0.844408428	0.914035088	0.92526475	0.07473525	0.513573001	0.899742931	0.653900047
320	1	0	1	1	1	0.8432	0.1568	0.996175908	0.844408428	0.914035088	0.92526475	0.07473525	0.513573001	0.899742931	0.653900047
320	1	0	1	1	1	0.8432	0.1568	0.996175908	0.844408428	0.914035088	0.92526475	0.07473525	0.513573001	0.899742931	0.653900047
320	1	0	1	1	1	0.8432	0.1568	0.996175908	0.844408428	0.914035088	0.92526475	0.07473525	0.513573001	0.899742931	0.653900047
320	1	0	1	1	1	0.8432	0.1568	0.996175908	0.844408428	0.914035088	0.92526475	0.07473525	0.513573001	0.899742931	0.653900047
320	1	0	1	1	1	0.8432	0.1568	0.996175908	0.844408428	0.914035088	0.92526475	0.07473525	0.513573001	0.899742931	0.653900047
320	1	0	1	1	1	0.8432	0.1568	0.996175908	0.844408428	0.914035088	0.92526475	0.07473525	0.513573001	0.899742931	0.653900047
320	1	0	1	1	1	0.8432	0.1568	0.996175908	0.844408428	0.914035088	0.92526475	0.07473525	0.513573001	0.899742931	0.653900047
320	1	0	1	1	1	0.8432	0.1568	0.996175908	0.844408428	0.914035088	0.92526475	0.07473525	0.513573001	0.899742931	0.653900047
320	1	0	1	1	1	0.8432	0.1568	0.996175908	0.844408428	0.914035088	0.92526475	0.07473525	0.513573001	0.899742931	0.653900047
320	1	0	1	1	1	0.8432	0.1568	0.996175908	0.844408428	0.914035088	0.92526475	0.07473525	0.513573001	0.899742931	0.653900047
320	1	0	1	1	1	0.8432	0.1568	0.996175908	0.844408428	0.914035088	0.92526475	0.07473525	0.513573001	0.899742931	0.653900047
320	1	0	1	1	1	0.8432	0.1568	0.996175908	0.844408428	0.914035088	0.92526475	0.07473525	0.513573001	0.899742931	0.653900047
320	1	0	1	1	1	0.8432	0.1568	0.996175908	0.844408428	0.914035088	0.92526475	0.07473525	0.513573001	0.899742931	0.653900047
320	1	0	1	1	1	0.8432	0.1568	0.996175908	0.844408428	0.914035088	0.92526475	0.07473525	0.513573001	0.899742931	0.653900047
320	1	0	1	1	1	0.8432	0.1568	0.996175908	0.844408428	0.914035088	0.92526475	0.07473525	0.513573001	0.899742931	0.653900047
320	1	0	1	1	1	0.8432	0.1568	0.996175908	0.844408428	0.914035088	0.92526475	0.07473525	0.513573001	0.899742931	0.653900047
320	1	0	1	1	1	0.8432	0.1568	0.996175908	0.844408428	0.914035088	0.92526475	0.07473525	0.513573001	0.899742931	0.653900047
320	1	0	1	1	1	0.8432	0.1568	0.996175908	0.844408428	0.914035088	0.92526475	0.07473525	0.513573001	0.899742931	0.653900047
320	1	0	1	1	1	0.8432	0.1568	0.996175908	0.844408428	0.914035088	0.92526475	0.07473525	0.513573001	0.899742931	0.653900047
320	1	0	1	1	1	0.8432	0.1568	0.996175908	0.844408428	0.914035088	0.92526475	0.07473525	0.513573001	0.899742931	0.653900047
320	1	0	1	1	1	0.8432	0.1568	0.996175908	0.844408428	0.914035088	0.92526475	0.07473525	0.513573001	0.899742931	0.653900047
320	1	0	1	1	1	0.8432	0.1568	0.996175908	0.844408428	0.914035088	0.92526475	0.07473525	0.513573001	0.899742931	0.653900047
320	1	0	1	1	1	0.8432	0.1568	0.996175908	0.844408428	0.914035088	0.92526475	0.07473525	0.513573001	0.899742931	0.653900047
320	1	0	1	1	1	0.8432	0.1568	0.996175908	0.844408428	0.914035088	0.92526475	0.07473525	0.513573001	0.899742931	0.653900047
320	1	0	1	1	1	0.8432	0.1568	0.996175908	0.844408428	0.914035088	0.92526475	0.07473525	0.513573001	0.899742931	0.653900047
320	1	0	1	1	1	0.8432	0.1568	0.996175908	0.844408428	0.914035088	0.92526475	0.07473525	0.513573001	0.899742931	0.653900047
320	1	0	1	1	1	0.8432	0.1568	0.996175908	0.844408428	0.914035088	0.92526475	0.07473525	0.513573001	0.899742931	0.653900047
320	1	0	1	1	1	0.8432	0.1568	0.996175908	0.844408428	0.914035088	0.92526475	0.07473525	0.513573001	0.899742931	0.653900047
320	1	0	1	1	1	0.8432	0.1568	0.996175908	0.844408428	0.914035088	0.92526475	0.07473525	0.513573001	0.899742931	0.653900047
320	1	0	1	1	1	0.8432	0.1568	0.996175908	0.844408428	0.914035088	0.92526475	0.07473525	0.513573001	0.899742931	0.653900047
320	1	0	1	1	1	0.8432	0.1568	0.996175908	0.844408428	0.914035088	0.92526475	0.07473525	0.513573001	0.899742931	0.653900047
320	1	0	1	1	1	0.8432	0.1568	0.996175908	0.844408428	0.914035088	0.92526475	0.07473525	0.513573001	0.899742931	0.653900047
320	1	0	1	1	1	0.8432	0.1568	0.996175908	0.844408428	0.914035088	0.92526475	0.07473525	0.513573001	0.899742931	0.653900047
320	1	0	1	1	1	0.8432	0.1568	0.996175908	0.844408428	0.914035088	0.92526475	0.07473525	0.513573001	0.899742931	0.653900047
320	1	0	1	1	1	0.8432	0.1568	0.996175908	0.844408428	0.914035088	0.92526475	0.07473525	0.513573001	0.899742931	0.653900047
320	1	0	1	1	1	0.8432	0.1568	0.996175908	0.844408428	0.914035088	0.92526475	0.07473525	0.513573001	0.899742931	0.653900047
320	1	0	1	1	1	0.8432	0.1568	0.996175908	0.844408428	0.914035088	0.92526475	0.07473525	0.513573001	0.899742931	0.653900047
320	1	0	1	1	1	0.8432	0.1568	0.996175908	0.844408428	0.914035088	0.92526475	0.07473525	0.513573001	0.899742931	0.653900047
320	1	0	1	1	1	0.8432	0.1568	0.996175908	0.844408428	0.914035088	0.92526475	0.07473525	0.513573001	0.899742931	0.653900047
320	1	0	1	1	1	0.8432	0.1568	0.996175908	0.844408428	0.914035088	0.92526475	0.07473525	0.513573001	0.899742931	0.653900047
320	1	0	1	1	1	0.8432	0.1568	0.996175908	0.844408428	0.914035088	0.92526475	0.07473525	0.513573001	0.899742931	0.653900047
320	1	0	1	1	1	0.8432	0.1568	0.996175908	0.844408428	0.914035088	0.92526475	0.07473525	0.513573001	0.899742931	0.653900047
320	1	0	1	1	1	0.8432	0.1568	0.996175908	0.844408428	0.914035088	0.92526475	0.07473525	0.513573001	0.899742931	0.653900047
320	1	0	1	1	1	0.8432	0.1568	0.996175908	0.844408428	0.914035088	0.92526475	0.07473525	0.513573001	0.899742931	0.653900047
320	1	0	1	1	1	0.8432	0.1568	0.996175908	0.844408428	0.914035088	0.92526475	0.07473525	0.513573001	0.899742931	0.653900047
320	1	0	1	1	1	0.8432	0.1568	0.996175908	0.844408428	0.914035088	0.92526475	0.07473525	0.513573001	0.899742931	0.653900047
320	1	0	1	1	1	0.8432	0.1568	0.996175908	0.844408428	0.914035088	0.92526475	0.07473525	0.513573001	0.899742931	0.653900047
320	1	0	1	1	1	0.8432	0.1568	0.996175908	0.844408428	0.914035088	0.92526475	0.07473525	0.513573001	0.899742931	0.653900047
320	1	0	1	1	1	0.8432	0.1568	0.996175908	0.844408428	0.914035088	0.92526475	0.07473525	0.513573001	0.899742931	0.653900047
320	1	0	1	1	1	0.8432	0.1568	0.996175908	0.844408428	0.914035088	0.92526475	0.07473525	0.513573001	0.899742931	0.653900047
320	1	0	1	1	1	0.8432	0.1568	0.996175908	0.844408428	0.914035088	0.92526475	0.07473525	0.513573001	0.899742931	0.653900047
320	1	0	1	1	1	0.8432	0.1568	0.996175908	0.844408428	0.914035088	0.92526475	0.07473525	0.513573001	0.899742931	0.653900047
320	1	0	1	1	1	0.8432	0.1568	0.996175908	0.844408428	0.914035088	0.92526475	0.07473525	0.513573001	0.899742931	0.653900047
320	1	0	1	1	1	0.8432	0.1568	0.996175908	0.844408428	0.914035088	0.92526475	0.07473525	0.513573001	0.899742931	0.653900047
320	1	0	1	1	1	0.8432	0.1568	0.996175908	0.844408428	0.914035088	0.92526475	0.07473525	0.513573001	0.899742931	0.653900047
320	1	0	1	1	1	0.8432	0.1568	0.996175908	0.844408428	0.914035088	0.92526475	0.07473525	0.513573001	0.899742931	0.653900047
320	1	0	1	1	1	0.8432	0.1568	0.996175908	0.844408428	0.914035088	0.92526475	0.07473525	0.513573001	0.899742931	0.653900047
320	1	0	1	1	1	0.8432	0.1568	0.996175908	0.844408428	0.914035088	0.92526475	0.07473525	0.513573001	0.899742931	0.653900047
320	1	0	1	1	1	0.8432	0.1568	0.996175908	0.844408428	0.914035088	0.92526475	0.07473525	0.513573001	0.899742931	0.653900047
320	1	0	1	1	1	0.8432	0.1568	0.996175908	0.844408428	0.914035088	0.92526475	0.07473525	0.513573001	0.899742931	0.653900047
320	1	0	1	1	1	0.8432	0.1568	0.996175908	0.844408428	0.914035088	0.92526475	0.07473525	0.513573001	0.899742931	0.653900047
320	1	0	1	1	1	0.8432	0.1568	0.996175908	0.844408428	0.914035088	0.92526475	0.07473525	0.513573001	0.899742931	0.653900047
320	1	0	1	1	1	0.8432	0.1568	0.996175908	0.844408428	0.914035088	0.92526475	0.07473525	0.513573001	0.899742931	0.653900047
320	1	0	1	1	1	0.8432	0.1568	0.996175908	0.844408428	0.914035088	0.92526475	0.07473525	0.513573001	0.899742931	0.653900047
320	1	0	1	1	1	0.8432	0.1568	0.996175908	0.844408428	0.914035088	0.92526475	0.07473525	0.513573001	0.899742931	0.653900047
320	1	0	1	1	1	0.8432	0.1568	0.996175908	0.844408428	0.914035088	0.92526475	0.07473525	0.513573001	0.899742931	0.653900047
320	1	0	1	1	1	0.8432	0.1568	0.996175908	0.844408428	0.914035088	0.92526475	0.07473525	0.513573001	0.899742931	0.653900047
320	1	0	1	1	1	0.8432	0.1568	0.996175908	0.844408428	0.914035088	0.92526475	0.07473525	0.513573001	0.899742931	0.653900047
320	1	0	1	1	1	0.8432	0.1568	0.996175908	0.844408428	0.914035088	0.92526475	0.07473525	0.513573001	0.899742931	0.653900047
320	1	0	1	1	1	0.8432	0.1568	0.996175908	0.844408428	0.914035088	0.92526475	0.07473525	0.513573001	0.899742931	0.653900047
320	1	0	1	1	1	0.8432	0.1568	0.996175908	0.844408428	0.914035088	0.92526475	0.07473525	0.513573001	0.899742931	0.653900047
320	1	0	1	1	1	0.8432	0.1568	0.996175908	0.844408428	0.914035088	0.92526475	0.07473525	0.513573001	0.899742931	0.653900047
320	1	0	1	1	1	0.8432	0.1568	0.996175908	0.844408428	0.914035088	0.92526475	0.07473525	0.513573001	0.899742931	0.653900047
320	1	0	1	1	1	0.8432	0.1568	0.996175908	0.844408428	0.914035088	0.92526475	0.07473525	0.513573001	0.899742931	0.653900047
320	1	0	1	1	1	0.8432	0.1568	0.996175908	0.844408428	0.914035088	0.92526475	0.07473525	0.513573001	0.899742931	0.653900047
320	1	0	1	1	1	0.8432	0.1568	0.996175908	0.844408428	0.914035088	0.92526475	0.07473525	0.513573001	0.899742931	0.653900047
320	1	0	1	1	1	0.8432	0.1568	0.996175908	0.844408428	0.914035088	0.92526475	0.07473525	0.513573001	0.899742931	0.653900047
320	1	0	1	1	1	0.8432	0.1568	0.996175908	0.844408428	0.914035088	0.92526475	0.07473525	0.513573001	0.899742931	0.653900047
320	1	0	1	1	1	0.8432	0.1568	0.996175908	0.844408428	0.914035088	0.92526475	0.07473525	0.513573001	0.899742931	0.653900047
320	1	0	1	1	1	0.8432	0.1568	0.996175908	0.844408428	0.914035088	0.92526475	0.07473525	0.513573001	0.899742931	0.653900047
320	1	0	1	1	1	0.8432	0.1568	0.996175908	0.844408428	0.914035088	0.92526475	0.07473525	0.513573001	0.899742931	0.653900047
319	1	0	1	1	1	0.852201258	0.147798742	0.996261682	0.8528	0.918965517	0.924676898	0.075323102	0.508810573	0.9	0.650093809
319	1	0	1	1	1	0.852201258	0.147798742	0.996261682	0.8528	0.918965517	0.924676898	0.075323102	0.508810573	0.9	0.650093809
319	1	0	1	1	1	0.852201258	0.147798742	0.996261682	0.8528	0.918965517	0.924676898	0.075323102	0.508810573	0.9	0.650093809
318	1	0	1	1	1	0.852201258	0.147798742	0.996261682	0.8528	0.918965517	0.924676898	0.075323102	0.508810573	0.9	0.650093809
317	1	0	1	1	1	0.851968504	0.148031496	0.996254682	0.852564103	0.918825561	0.925088339	0.074911661	0.510653931	0.901426719	0.651969981
317	1	0	1	1	1	0.851968504	0.148031496	0.996254682	0.852564103	0.918825561	0.925088339	0.074911661	0.510653931	0.901426719	0.651969981
317	1	0	1	1	1	0.851968504	0.148031496	0.996254682	0.852564103	0.918825561	0.925088339	0.074911661	0.510653931	0.901426719	0.651969981
316	1	0	1	1	1	0.850863422	0.149136578	0.996254682	0.8512	0.918032787	0.925477128	0.074522872	0.511764706	0.903896104	0.653521127
316	1	0	1	1	1	0.850863422	0.149136578	0.996254682	0.8512	0.918032787	0.925477128	0.074522872	0.511764706	0.903896104	0.653521127
316	1	0	1	1	1	0.850863422	0.149136578	0.996254682	0.8512	0.918032787	0.925477128	0.074522872	0.511764706	0.903896104	0.653521127
316	1	0	1	1	1	0.850863422	0.149136578	0.996254682	0.8512	0.918032787	0.925477128	0.074522872	0.511764706	0.903896104	0.653521127
316	1	0	1	1	1	0.850863422	0.149136578	0.996254682	0.8512	0.918032787	0.925477128	0.074522872	0.511764706	0.903896104	0.653521127
316	1	0	1	1	1	0.850863422	0.149136578	0.996254682	0.8512	0.918032787	0.925477128	0.074522872	0.511764706	0.903896104	0.653521127
316	1	0	1	1	1	0.850863422	0.149136578	0.996254682	0.8512	0.918032787	0.925477128	0.074522872	0.511764706	0.903896104	0.653521127
315	1	0	1	1	1	0.840947547	0.159052453	1	0.84040747	0.913284133	0.92964117	0.07035883	0.538129496	0.928039702	0.681238616
315	1	0	1	1	1	0.840947547	0.159052453	1	0.84040747	0.913284133	0.92964117	0.07035883	0.538129496	0.928039702	0.681238616
314	1	0	1	1	1	0.842105263	0.157894737	1	0.841567291	0.913968548	0.929353834	0.070646166	0.537634409	0.928217822	0.680889696
314	1	0	1	1	1	0.842105263	0.157894737	1	0.841567291	0.913968548	0.929353834	0.070646166	0.537634409	0.928217822	0.680889696
313	1	0	1	1	1	0.843537415	0.156462585	1	0.843003413	0.914814815	0.929461415	0.070538585	0.538296349	0.929542645	0.681776972
313	1	0	1	1	1	0.843537415	0.156462585	1	0.843003413	0.914814815	0.929461415	0.070538585	0.538296349	0.929542645	0.681776972
313	1	0	1	1	1	0.843537415	0.156462585	1	0.843003413	0.914814815	0.929461415	0.070538585	0.538296349	0.929542645	0.681776972
313	1	0	1	1	1	0.843537415	0.156462585	1	0.843003413	0.914814815	0.929461415	0.070538585	0.538296349	0.929542645	0.681776972
313	1	0	1	1	1	0.843537415	0.156462585	1	0.843003413	0.914814815	0.929461415	0.070538585	0.538296349	0.929542645	0.681776972
313	1	0	1	1	1	0.843537415	0.156462585	1	0.843003413	0.914814815	0.929461415	0.070538585	0.538296349	0.929542645	0.681776972
312	1	0	1	1	1	0.843537415	0.156462585	1	0.843003413	0.914814815	0.929461415	0.070538585	0.538296349	0.929542645	0.681776972
312	1	0	1	1	1	0.843537415	0.156462585	1	0.843003413	0.914814815	0.929461415	0.070538585	0.538296349	0.929542645	0.681776972
312	1	0	1	1	1	0.843537415	0.156462585	1	0.843003413	0.914814815	0.929461415	0.070538585	0.538296349	0.929542645	0.681776972
312	1	0	1	1	1	0.843537415	0.156462585	1	0.843003413	0.914814815	0.929461415	0.070538585	0.538296349	0.929542645	0.681776972
311	1	0	1	1	1	0.843537415	0.156462585	1	0.843003413	0.914814815	0.929561897	0.070438103	0.538681948	0.929542645	0.682086168
311	1	0	1	1	1	0.843537415	0.156462585	1	0.843003413	0.914814815	0.929561897	0.070438103	0.538681948	0.929542645	0.682086168
310	1	0	1	1	1	0.843537415	0.156462585	1	0.843003413	0.914814815	0.929561897	0.070438103	0.538681948	0.929542645	0.682086168
310	1	0	1	1	1	0.843537415	0.156462585	1	0.843003413	0.914814815	0.929561897	0.070438103	0.538681948	0.929542645	0.682086168
310	1	0	1	1	1	0.843537415	0.156462585	1	0.843003413	0.914814815	0.929561897	0.070438103	0.538681948	0.929542645	0.682086168
310	1	0	1	1	1	0.843537415	0.156462585	1	0.843003413	0.914814815	0.929561897	0.070438103	0.538681948	0.929542645	0.682086168
310	1	0	1	1	1	0.843537415	0.156462585	1	0.843003413	0.914814815	0.929561897	0.070438103	0.538681948	0.929542645	0.682086168
310	1	0	1	1	1	0.843537415	0.156462585	1	0.843003413	0.914814815	0.929561897	0.070438103	0.538681948	0.929542645	0.682086168
310	1	0	1	1	1	0.843537415	0.156462585	1	0.843003413	0.914814815	0.929561897	0.070438103	0.538681948	0.929542645	0.682086168
310	1	0	1	1	1	0.843537415	0.156462585	1	0.843003413	0.914814815	0.929561897	0.070438103	0.538681948	0.929542645	0.682086168
309	1	0	1	1	1	0.843537415	0.156462585	1	0.843003413	0.914814815	0.929561897	0.070438103	0.538681948	0.929542645	0.682086168
308	1	0	1	1	1	0.843803056	0.156196944	1	0.843270869	0.914972274	0.929755803	0.070244197	0.539124192	0.929455446	0.682417083
308	1	0	1	1	1	0.843803056	0.156196944	1	0.843270869	0.914972274	0.929755803	0.070244197	0.539124192	0.929455446	0.682417083
308	1	0	1	1	1	0.843803056	0.156196944	1	0.843270869	0.914972274	0.929755803	0.070244197	0.539124192	0.929455446	0.682417083
308	1	0	1	1	1	0.843803056	0.156196944	1	0.843270869	0.914972274	0.929755803	0.070244197	0.539124192	0.929455446	0.682417083
308	1	0	1	1	1	0.843803056	0.156196944	1	0.843270869	0.914972274	0.929755803	0.070244197	0.539124192	0.929455446	0.682417083
308	1	0	1	1	1	0.843803056	0.156196944	1	0.843270869	0.914972274	0.929755803	0.070244197	0.539124192	0.929455446	0.682417083
308	1	0	1	1	1	0.843803056	0.156196944	1	0.843270869	0.914972274	0.929755803	0.070244197	0.539124192	0.929455446	0.682417083
308	1	0	1	1	1	0.843803056	0.156196944	1	0.843270869	0.914972274	0.929755803	0.070244197	0.539124192	0.929455446	0.682417083
308	1	0	1	1	1	0.843803056	0.156196944	1	0.843270869	0.914972274	0.929755803	0.070244197	0.539124192	0.929455446	0.682417083
308	1	0	1	1	1	0.843803056	0.156196944	1	0.843270869	0.914972274	0.929755803	0.070244197	0.539124192	0.929455446	0.682417083
308	1	0	1	1	1	0.843803056	0.156196944	1	0.843270869	0.914972274	0.929755803	0.070244197	0.539124192	0.929455446	0.682417083
308	1	0	1	1	1	0.843803056	0.156196944	1	0.843270869	0.914972274	0.929755803	0.070244197	0.539124192	0.929455446	0.682417083
308	1	0	1	1	1	0.843803056	0.156196944	1	0.843270869	0.914972274	0.929755803	0.070244197	0.539124192	0.929455446	0.682417083
308	1	0	1	1	1	0.843803056	0.156196944	1	0.843270869	0.914972274	0.929755803	0.070244197	0.539124192	0.929455446	0.682417083
308	1	0	1	1	1	0.843803056	0.156196944	1	0.843270869	0.914972274	0.929755803	0.070244197	0.539124192	0.929455446	0.682417083
308	1	0	1	1	1	0.843803056	0.156196944	1	0.843270869	0.914972274	0.929755803	0.070244197	0.539124192	0.929455446	0.682417083
308	1	0	1	1	1	0.843803056	0.156196944	1	0.843270869	0.914972274	0.929755803	0.070244197	0.539124192	0.929455446	0.682417083
308	1	0	1	1	1	0.843803056	0.156196944	1	0.843270869	0.914972274	0.929755803	0.070244197	0.539124192	0.929455446	0.682417083
308	1	0	1	1	1	0.843803056	0.156196944	1	0.843270869	0.914972274	0.929755803	0.070244197	0.539124192	0.929455446	0.682417083
308	1	0	1	1	1	0.843803056	0.156196944	1	0.843270869	0.914972274	0.929755803	0.070244197	0.539124192	0.929455446	0.682417083
308	1	0	1	1	1	0.843803056	0.156196944	1	0.843270869	0.914972274	0.929755803	0.070244197	0.539124192	0.929455446	0.682417083
308	1	0	1	1	1	0.843803056	0.156196944	1	0.843270869	0.914972274	0.929755803	0.070244197	0.539124192	0.929455446	0.682417083
308	1	0	1	1	1	0.843803056	0.156196944	1	0.843270869	0.914972274	0.929755803	0.070244197	0.539124192	0.929455446	0.682417083
308	1	0	1	1	1	0.843803056	0.156196944	1	0.843270869	0.914972274	0.929755803	0.070244197	0.539124192	0.929455446	0.682417083
308	1	0	1	1	1	0.843803056	0.156196944	1	0.843270869	0.914972274	0.929755803	0.070244197	0.539124192	0.929455446	0.682417083
308	1	0	1	1	1	0.843803056	0.156196944	1	0.843270869	0.914972274	0.929755803	0.070244197	0.539124192	0.929455446	0.682417083
308	1	0	1	1	1	0.843803056	0.156196944	1	0.843270869	0.914972274	0.929755803	0.070244197	0.539124192	0.929455446	0.682417083
308	1	0	1	1	1	0.843803056	0.156196944	1	0.843270869	0.914972274	0.929755803	0.070244197	0.539124192	0.929455446	0.682417083
308	1	0	1	1	1	0.843803056	0.156196944	1	0.843270869	0.914972274	0.929755803	0.070244197	0.539124192	0.929455446	0.682417083
308	1	0	1	1	1	0.843803056	0.156196944	1	0.843270869	0.914972274	0.929755803	0.070244197	0.539124192	0.929455446	0.682417083
308	1	0	1	1	1	0.843803056	0.156196944	1	0.843270869	0.914972274	0.929755803	0.070244197	0.539124192	0.929455446	0.682417083
308	1	0	1	1	1	0.843803056	0.156196944	1	0.843270869	0.914972274	0.929755803	0.070244197	0.539124192	0.929455446	0.682417083
308	1	0	1	1	1	0.843803056	0.156196944	1	0.843270869	0.914972274	0.929755803	0.070244197	0.539124192	0.929455446	0.682417083
308	1	0	1	1	1	0.843803056	0.156196944	1	0.843270869	0.914972274	0.929755803	0.070244197	0.539124192	0.929455446	0.682417083
308	1	0	1	1	1	0.843803056	0.156196944	1	0.843270869	0.914972274	0.929755803	0.070244197	0.539124192	0.929455446	0.682417083
308	1	0	1	1	1	0.843803056	0.156196944	1	0.843270869	0.914972274	0.929755803	0.070244197	0.539124192	0.929455446	0.682417083
308	1	0	1	1	1	0.843803056	0.156196944	1	0.843270869	0.914972274	0.929755803	0.070244197	0.539124192	0.929455446	0.682417083
308	1	0	1	1	1	0.843803056	0.156196944	1	0.843270869	0.914972274	0.929755803	0.070244197	0.539124192	0.929455446	0.682417083
308	1	0	1	1	1	0.843803056	0.156196944	1	0.843270869	0.914972274	0.929755803	0.070244197	0.539124192	0.929455446	0.682417083
308	1	0	1	1	1	0.843803056	0.156196944	1	0.843270869	0.914972274	0.929755803	0.070244197	0.539124192	0.929455446	0.682417083
307	1	0	1	1	1	0.843537415	0.156462585	1	0.843003413	0.914814815	0.929762862	0.070237138	0.539454806	0.929542645	0.682705402
307	1	0	1	1	1	0.843537415	0.156462585	1	0.843003413	0.914814815	0.929762862	0.070237138	0.539454806	0.929542645	0.682705402
307	1	0	1	1	1	0.843537415	0.156462585	1	0.843003413	0.914814815	0.929762862	0.070237138	0.539454806	0.929542645	0.682705402
307	1	0	1	1	1	0.843537415	0.156462585	1	0.843003413	0.914814815	0.929762862	0.070237138	0.539454806	0.929542645	0.682705402
307	1	0	1	1	1	0.843537415	0.156462585	1	0.843003413	0.914814815	0.929762862	0.070237138	0.539454806	0.929542645	0.682705402
307	1	0	1	1	1	0.843537415	0.156462585	1	0.843003413	0.914814815	0.929762862	0.070237138	0.539454806	0.929542645	0.682705402
307	1	0	1	1	1	0.843537415	0.156462585	1	0.843003413	0.914814815	0.929762862	0.070237138	0.539454806	0.929542645	0.682705402
307	1	0	1	1	1	0.843537415	0.156462585	1	0.843003413	0.914814815	0.929762862	0.070237138	0.539454806	0.929542645	0.682705402
307	1	0	1	1	1	0.843537415	0.156462585	1	0.843003413	0.914814815	0.929762862	0.070237138	0.539454806	0.929542645	0.682705402
307	1	0	1	1	1	0.843537415	0.156462585	1	0.843003413	0.914814815	0.929762862	0.070237138	0.539454806	0.929542645	0.682705402
307	1	0	1	1	1	0.843537415	0.156462585	1	0.843003413	0.914814815	0.929762862	0.070237138	0.539454806	0.929542645	0.682705402
307	1	0	1	1	1	0.843537415	0.156462585	1	0.843003413	0.914814815	0.929762862	0.070237138	0.539454806	0.929542645	0.682705402
307	1	0	1	1	1	0.843537415	0.156462585	1	0.843003413	0.914814815	0.929762862	0.070237138	0.539454806	0.929542645	0.682705402
307	1	0	1	1	1	0.843537415	0.156462585	1	0.843003413	0.914814815	0.929762862	0.070237138	0.539454806	0.929542645	0.682705402
307	1	0	1	1	1	0.843537415	0.156462585	1	0.843003413	0.914814815	0.929762862	0.070237138	0.539454806	0.929542645	0.682705402
307	1	0	1	1	1	0.843537415	0.156462585	1	0.843003413	0.914814815	0.929762862	0.070237138	0.539454806	0.929542645	0.682705402
307	1	0	1	1	1	0.843537415	0.156462585	1	0.843003413	0.914814815	0.929762862	0.070237138	0.539454806	0.929542645	0.682705402
307	1	0	1	1	1	0.843537415	0.156462585	1	0.843003413	0.914814815	0.929762862	0.070237138	0.539454806	0.929542645	0.682705402
307	1	0	1	1	1	0.843537415	0.156462585	1	0.843003413	0.914814815	0.929762862	0.070237138	0.539454806	0.929542645	0.682705402
307	1	0	1	1	1	0.843537415	0.156462585	1	0.843003413	0.914814815	0.929762862	0.070237138	0.539454806	0.929542645	0.682705402
307	1	0	1	1	1	0.843537415	0.156462585	1	0.843003413	0.914814815	0.929762862	0.070237138	0.539454806	0.929542645	0.682705402
307	1	0	1	1	1	0.843537415	0.156462585	1	0.843003413	0.914814815	0.929762862	0.070237138	0.539454806	0.929542645	0.682705402
307	1	0	1	1	1	0.843537415	0.156462585	1	0.843003413	0.914814815	0.929762862	0.070237138	0.539454806	0.929542645	0.682705402
307	1	0	1	1	1	0.843537415	0.156462585	1	0.843003413	0.914814815	0.929762862	0.070237138	0.539454806	0.929542645	0.682705402
307	1	0	1	1	1	0.843537415	0.156462585	1	0.843003413	0.914814815	0.929762862	0.070237138	0.539454806	0.929542645	0.682705402
307	1	0	1	1	1	0.843537415	0.156462585	1	0.843003413	0.914814815	0.929762862	0.070237138	0.539454806	0.929542645	0.682705402
307	1	0	1	1	1	0.843537415	0.156462585	1	0.843003413	0.914814815	0.929762862	0.070237138	0.539454806	0.929542645	0.682705402
307	1	0	1	1	1	0.843537415	0.156462585	1	0.843003413	0.914814815	0.929762862	0.070237138	0.539454806	0.929542645	0.682705402
307	1	0	1	1	1	0.843537415	0.156462585	1	0.843003413	0.914814815	0.929762862	0.070237138	0.539454806	0.929542645	0.682705402
307	1	0	1	1	1	0.843537415	0.156462585	1	0.843003413	0.914814815	0.929762862	0.070237138	0.539454806	0.929542645	0.682705402
307	1	0	1	1	1	0.843537415	0.156462585	1	0.843003413	0.914814815	0.929762862	0.070237138	0.539454806	0.929542645	0.682705402
307	1	0	1	1	1	0.843537415	0.156462585	1	0.843003413	0.914814815	0.929762862	0.070237138	0.539454806	0.929542645	0.682705402
307	1	0	1	1	1	0.843537415	0.156462585	1	0.843003413	0.914814815	0.929762862	0.070237138	0.539454806	0.929542645	0.682705402
307	1	0	1	1	1	0.843537415	0.156462585	1	0.843003413	0.914814815	0.929762862	0.070237138	0.539454806	0.929542645	0.682705402
307	1	0	1	1	1	0.843537415	0.156462585	1	0.843003413	0.914814815	0.929762862	0.070237138	0.539454806	0.929542645	0.682705402
307	1	0	1	1	1	0.843537415	0.156462585	1	0.843003413	0.914814815	0.929762862	0.070237138	0.539454806	0.929542645	0.682705402
307	1	0	1	1	1	0.843537415	0.156462585	1	0.843003413	0.914814815	0.929762862	0.070237138	0.539454806	0.929542645	0.682705402
307	1	0	1	1	1	0.843537415	0.156462585	1	0.843003413	0.914814815	0.929762862	0.070237138	0.539454806	0.929542645	0.682705402
307	1	0	1	1	1	0.843537415	0.156462585	1	0.843003413	0.914814815	0.929762862	0.070237138	0.539454806	0.929542645	0.682705402
307	1	0	1	1	1	0.843537415	0.156462585	1	0.843003413	0.914814815	0.929762862	0.070237138	0.539454806	0.929542645	0.682705402
307	1	0	1	1	1	0.843537415	0.156462585	1	0.843003413	0.914814815	0.929762862	0.070237138	0.539454806	0.929542645	0.682705402
307	1	0	1	1	1	0.843537415	0.156462585	1	0.843003413	0.914814815	0.929762862	0.070237138	0.539454806	0.929542645	0.682705402
307	1	0	1	1	1	0.843537415	0.156462585	1	0.843003413	0.914814815	0.929762862	0.070237138	0.539454806	0.929542645	0.682705402
307	1	0	1	1	1	0.843537415	0.156462585	1	0.843003413	0.914814815	0.929762862	0.070237138	0.539454806	0.929542645	0.682705402
307	1	0	1	1	1	0.843537415	0.156462585	1	0.843003413	0.914814815	0.929762862	0.070237138	0.539454806	0.929542645	0.682705402
307	1	0	1	1	1	0.843537415	0.156462585	1	0.843003413	0.914814815	0.929762862	0.070237138	0.539454806	0.929542645	0.682705402
307	1	0	1	1	1	0.843537415	0.156462585	1	0.843003413	0.914814815	0.929762862	0.070237138	0.539454806	0.929542645	0.682705402
307	1	0	1	1	1	0.843537415	0.156462585	1	0.843003413	0.914814815	0.929762862	0.070237138	0.539454806	0.929542645	0.682705402
307	1	0	1	1	1	0.843537415	0.156462585	1	0.843003413	0.914814815	0.929762862	0.070237138	0.539454806	0.929542645	0.682705402
307	1	0	1	1	1	0.843537415	0.156462585	1	0.843003413	0.914814815	0.929762862	0.070237138	0.539454806	0.929542645	0.682705402
307	1	0	1	1	1	0.843537415	0.156462585	1	0.843003413	0.914814815	0.929762862	0.070237138	0.539454806	0.929542645	0.682705402
307	1	0	1	1	1	0.843537415	0.156462585	1	0.843003413	0.914814815	0.929762862	0.070237138	0.539454806	0.929542645	0.682705402
307	1	0	1	1	1	0.843537415	0.156462585	1	0.843003413	0.914814815	0.929762862	0.070237138	0.539454806	0.929542645	0.682705402
307	1	0	1	1	1	0.843537415	0.156462585	1	0.843003413	0.914814815	0.929762862	0.070237138	0.539454806	0.929542645	0.682705402
307	1	0	1	1	1	0.843537415	0.156462585	1	0.843003413	0.914814815	0.929762862	0.070237138	0.539454806	0.929542645	0.682705402
307	1	0	1	1	1	0.843537415	0.156462585	1	0.843003413	0.914814815	0.929762862	0.070237138	0.539454806	0.929542645	0.682705402
307	1	0	1	1	1	0.843537415	0.156462585	1	0.843003413	0.914814815	0.929762862	0.070237138	0.539454806	0.929542645	0.682705402
307	1	0	1	1	1	0.843537415	0.156462585	1	0.843003413	0.914814815	0.929762862	0.070237138	0.539454806	0.929542645	0.682705402
307	1	0	1	1	1	0.843537415	0.156462585	1	0.843003413	0.914814815	0.929762862	0.070237138	0.539454806	0.929542645	0.682705402
307	1	0	1	1	1	0.843537415	0.156462585	1	0.843003413	0.914814815	0.929762862	0.070237138	0.539454806	0.929542645	0.682705402
307	1	0	1	1	1	0.843537415	0.156462585	1	0.843003413	0.914814815	0.929762862	0.070237138	0.539454806	0.929542645	0.682705402
307	1	0	1	1	1	0.843537415	0.156462585	1	0.843003413	0.914814815	0.929762862	0.070237138	0.539454806	0.929542645	0.682705402
307	1	0	1	1	1	0.843537415	0.156462585	1	0.843003413	0.914814815	0.929762862	0.070237138	0.539454806	0.929542645	0.682705402
307	1	0	1	1	1	0.843537415	0.156462585	1	0.843003413	0.914814815	0.929762862	0.070237138	0.539454806	0.929542645	0.682705402
307	1	0	1	1	1	0.843537415	0.156462585	1	0.843003413	0.914814815	0.929762862	0.070237138	0.539454806	0.929542645	0.682705402
307	1	0	1	1	1	0.843537415	0.156462585	1	0.843003413	0.914814815	0.929762862	0.070237138	0.539454806	0.929542645	0.682705402
307	1	0	1	1	1	0.843537415	0.156462585	1	0.843003413	0.914814815	0.929762862	0.070237138	0.539454806	0.929542645	0.682705402
307	1	0	1	1	1	0.843537415	0.156462585	1	0.843003413	0.914814815	0.929762862	0.070237138	0.539454806	0.929542645	0.682705402
307	1	0	1	1	1	0.843537415	0.156462585	1	0.843003413	0.914814815	0.929762862	0.070237138	0.539454806	0.929542645	0.682705402
307	1	0	1	1	1	0.843537415	0.156462585	1	0.843003413	0.914814815	0.929762862	0.070237138	0.539454806	0.929542645	0.682705402
307	1	0	1	1	1	0.843537415	0.156462585	1	0.843003413	0.914814815	0.929762862	0.070237138	0.539454806	0.929542645	0.682705402
307	1	0	1	1	1	0.843537415	0.156462585	1	0.843003413	0.914814815	0.929762862	0.070237138	0.539454806	0.929542645	0.682705402
307	1	0	1	1	1	0.843537415	0.156462585	1	0.843003413	0.914814815	0.929762862	0.070237138	0.539454806	0.929542645	0.682705402
307	1	0	1	1	1	0.843537415	0.156462585	1	0.843003413	0.914814815	0.929762862	0.070237138	0.539454806	0.929542645	0.682705402
307	1	0	1	1	1	0.843537415	0.156462585	1	0.843003413	0.914814815	0.929762862	0.070237138	0.539454806	0.929542645	0.682705402
307	1	0	1	1	1	0.843537415	0.156462585	1	0.843003413	0.914814815	0.929762862	0.070237138	0.539454806	0.929542645	0.682705402
307	1	0	1	1	1	0.843537415	0.156462585	1	0.843003413	0.914814815	0.929762862	0.070237138	0.539454806	0.929542645	0.682705402
307	1	0	1	1	1	0.843537415	0.156462585	1	0.843003413	0.914814815	0.929762862	0.070237138	0.539454806	0.929542645	0.682705402
307	1	0	1	1	1	0.843537415	0.156462585	1	0.843003413	0.914814815	0.929762862	0.070237138	0.539454806	0.929542645	0.682705402
307	1	0	1	1	1	0.843537415	0.156462585	1	0.843003413	0.914814815	0.929762862	0.070237138	0.539454806	0.929542645	0.682705402
307	1	0	1	1	1	0.843537415	0.156462585	1	0.843003413	0.914814815	0.929762862	0.070237138	0.539454806	0.929542645	0.682705402
307	1	0	1	1	1	0.843537415	0.156462585	1	0.843003413	0.914814815	0.929762862	0.070237138	0.539454806	0.929542645	0.682705402
307	1	0	1	1	1	0.843537415	0.156462585	1	0.843003413	0.914814815	0.929762862	0.070237138	0.539454806	0.929542645	0.682705402
307	1	0	1	1	1	0.843537415	0.156462585	1	0.843003413	0.914814815	0.929762862	0.070237138	0.539454806	0.929542645	0.682705402
307	1	0	1	1	1	0.843537415	0.156462585	1	0.843003413	0.914814815	0.929762862	0.070237138	0.539454806	0.929542645	0.682705402
307	1	0	1	1	1	0.843537415	0.156462585	1	0.843003413	0.914814815	0.929762862	0.070237138	0.539454806	0.929542645	0.682705402
307	1	0	1	1	1	0.843537415	0.156462585	1	0.843003413	0.914814815	0.929762862	0.070237138	0.539454806	0.929542645	0.682705402
307	1	0	1	1	1	0.843537415	0.156462585	1	0.843003413	0.914814815	0.929762862	0.070237138	0.539454806	0.929542645	0.682705402
307	1	0	1	1	1	0.843537415	0.156462585	1	0.843003413	0.914814815	0.929762862	0.070237138	0.539454806	0.929542645	0.682705402
307	1	0	1	1	1	0.843537415	0.156462585	1	0.843003413	0.914814815	0.929762862	0.070237138	0.539454806	0.929542645	0.682705402
307	1	0	1	1	1	0.843537415	0.156462585	1	0.843003413	0.914814815	0.929762862	0.070237138	0.539454806	0.929542645	0.682705402
307	1	0	1	1	1	0.843537415	0.156462585	1	0.843003413	0.914814815	0.929762862	0.070237138	0.539454806	0.929542645	0.682705402
307	1	0	1	1	1	0.843537415	0.156462585	1	0.843003413	0.914814815	0.929762862	0.070237138	0.539454806	0.929542645	0.682705402
307	1	0	1	1	1	0.843537415	0.156462585	1	0.843003413	0.914814815	0.929762862	0.070237138	0.539454806	0.929542645	0.682705402
307	1	0	1	1	1	0.843537415	0.156462585	1	0.843003413	0.914814815	0.929762862	0.070237138	0.539454806	0.929542645	0.682705402
307	1	0	1	1	1	0.843537415	0.156462585	1	0.843003413	0.914814815	0.929762862	0.070237138	0.539454806	0.929542645	0.682705402
307	1	0	1	1	1	0.843537415	0.156462585	1	0.843003413	0.914814815	0.929762862	0.070237138	0.539454806	0.929542645	0.682705402
307	1	0	1	1	1	0.843537415	0.156462585	1	0.843003413	0.914814815	0.929762862	0.070237138	0.539454806	0.929542645	0.682705402
307	1	0	1	1	1	0.843537415	0.156462585	1	0.843003413	0.914814815	0.929762862	0.070237138	0.539454806	0.929542645	0.682705402
307	1	0	1	1	1	0.843537415	0.156462585	1	0.843003413	0.914814815	0.929762862	0.070237138	0.539454806	0.929542645	0.682705402
307	1	0	1	1	1	0.843537415	0.156462585	1	0.843003413	0.914814815	0.929762862	0.070237138	0.539454806	0.929542645	0.682705402
307	1	0	1	1	1	0.843537415	0.156462585	1	0.843003413	0.914814815	0.929762862	0.070237138	0.539454806	0.929542645	0.682705402
307	1	0	1	1	1	0.843537415	0.156462585	1	0.843003413	0.914814815	0.929762862	0.070237138	0.539454806	0.929542645	0.682705402
307	1	0	1	1	1	0.843537415	0.156462585	1	0.843003413	0.914814815	0.929762862	0.070237138	0.539454806	0.929542645	0.682705402
307	1	0	1	1	1	0.843537415	0.156462585	1	0.843003413	0.914814815	0.929762862	0.070237138	0.539454806	0.929542645	0.682705402
307	1	0	1	1	1	0.843537415	0.156462585	1	0.843003413	0.914814815	0.929762862	0.070237138	0.539454806	0.929542645	0.682705402
307	1	0	1	1	1	0.843537415	0.156462585	1	0.843003413	0.914814815	0.929762862	0.070237138	0.539454806	0.929542645	0.682705402
307	1	0	1	1	1	0.843537415	0.156462585	1	0.843003413	0.914814815	0.929762862	0.070237138	0.539454806	0.929542645	0.682705402
307	1	0	1	1	1	0.843537415	0.156462585	1	0.843003413	0.914814815	0.929762862	0.070237138	0.539454806	0.929542645	0.682705402
307	1	0	1	1	1	0.843537415	0.156462585	1	0.843003413	0.914814815	0.929762862	0.070237138	0.539454806	0.929542645	0.682705402
307	1	0	1	1	1	0.843537415	0.156462585	1	0.843003413	0.914814815	0.929762862	0.070237138	0.539454806	0.929542645	0.682705402
307	1	0	1	1	1	0.843537415	0.156462585	1	0.843003413	0.914814815	0.929762862	0.070237138	0.539454806	0.929542645	0.682705402
