# Supplementary material for: An Improved Hybrid Feature Selection Algorithm for Electric Charge Recovery Risk
Source: Hindawi journal article supplement (doi:10.1155/2020/8479341), 2020-08-28
Supplement: f1 [file 8479341.f1.zip › 8479341.f1/Experimental Results/201806/BPSO_results.csv]

features_num	Accuracy_high	Loss_high	Precission_high	Recall_high	F1_high	Accuracy_med	Loss_med	Precission_med	Recall_med	F1_med	Accuracy_low	Loss_low	Precission_low	Recall_low	F1_low
360	1.0	0.0	1.0	1.0	1.0	0.6804733727810651	0.3195266272189349	0.816	0.7669172932330827	0.7906976744186045	0.880023524799059	0.11997647520094101	0.4683122081387592	0.6217891939769707	0.5342465753424659
360	1.0	0.0	1.0	1.0	1.0	0.6804733727810651	0.3195266272189349	0.816	0.7669172932330827	0.7906976744186045	0.880023524799059	0.11997647520094101	0.4683122081387592	0.6217891939769707	0.5342465753424659
370	1.0	0.0	1.0	1.0	1.0	0.8166089965397924	0.18339100346020765	0.9234135667396062	0.8559837728194726	0.8884210526315789	0.9041687594173782	0.09583124058262182	0.479181369089626	0.758659217877095	0.5873702422145328
370	1.0	0.0	1.0	1.0	1.0	0.8166089965397924	0.18339100346020765	0.9234135667396062	0.8559837728194726	0.8884210526315789	0.9041687594173782	0.09583124058262182	0.479181369089626	0.758659217877095	0.5873702422145328
370	1.0	0.0	1.0	1.0	1.0	0.8166089965397924	0.18339100346020765	0.9234135667396062	0.8559837728194726	0.8884210526315789	0.9041687594173782	0.09583124058262182	0.479181369089626	0.758659217877095	0.5873702422145328
370	1.0	0.0	1.0	1.0	1.0	0.8166089965397924	0.18339100346020765	0.9234135667396062	0.8559837728194726	0.8884210526315789	0.9041687594173782	0.09583124058262182	0.479181369089626	0.758659217877095	0.5873702422145328
370	1.0	0.0	1.0	1.0	1.0	0.8166089965397924	0.18339100346020765	0.9234135667396062	0.8559837728194726	0.8884210526315789	0.9041687594173782	0.09583124058262182	0.479181369089626	0.758659217877095	0.5873702422145328
370	1.0	0.0	1.0	1.0	1.0	0.8166089965397924	0.18339100346020765	0.9234135667396062	0.8559837728194726	0.8884210526315789	0.9041687594173782	0.09583124058262182	0.479181369089626	0.758659217877095	0.5873702422145328
370	1.0	0.0	1.0	1.0	1.0	0.8166089965397924	0.18339100346020765	0.9234135667396062	0.8559837728194726	0.8884210526315789	0.9041687594173782	0.09583124058262182	0.479181369089626	0.758659217877095	0.5873702422145328
370	1.0	0.0	1.0	1.0	1.0	0.8166089965397924	0.18339100346020765	0.9234135667396062	0.8559837728194726	0.8884210526315789	0.9041687594173782	0.09583124058262182	0.479181369089626	0.758659217877095	0.5873702422145328
370	1.0	0.0	1.0	1.0	1.0	0.8166089965397924	0.18339100346020765	0.9234135667396062	0.8559837728194726	0.8884210526315789	0.9041687594173782	0.09583124058262182	0.479181369089626	0.758659217877095	0.5873702422145328
370	1.0	0.0	1.0	1.0	1.0	0.8166089965397924	0.18339100346020765	0.9234135667396062	0.8559837728194726	0.8884210526315789	0.9041687594173782	0.09583124058262182	0.479181369089626	0.758659217877095	0.5873702422145328
370	1.0	0.0	1.0	1.0	1.0	0.8166089965397924	0.18339100346020765	0.9234135667396062	0.8559837728194726	0.8884210526315789	0.9041687594173782	0.09583124058262182	0.479181369089626	0.758659217877095	0.5873702422145328
370	1.0	0.0	1.0	1.0	1.0	0.8166089965397924	0.18339100346020765	0.9234135667396062	0.8559837728194726	0.8884210526315789	0.9041687594173782	0.09583124058262182	0.479181369089626	0.758659217877095	0.5873702422145328
370	1.0	0.0	1.0	1.0	1.0	0.8166089965397924	0.18339100346020765	0.9234135667396062	0.8559837728194726	0.8884210526315789	0.9041687594173782	0.09583124058262182	0.479181369089626	0.758659217877095	0.5873702422145328
370	1.0	0.0	1.0	1.0	1.0	0.8166089965397924	0.18339100346020765	0.9234135667396062	0.8559837728194726	0.8884210526315789	0.9041687594173782	0.09583124058262182	0.479181369089626	0.758659217877095	0.5873702422145328
370	1.0	0.0	1.0	1.0	1.0	0.8166089965397924	0.18339100346020765	0.9234135667396062	0.8559837728194726	0.8884210526315789	0.9041687594173782	0.09583124058262182	0.479181369089626	0.758659217877095	0.5873702422145328
370	1.0	0.0	1.0	1.0	1.0	0.8166089965397924	0.18339100346020765	0.9234135667396062	0.8559837728194726	0.8884210526315789	0.9041687594173782	0.09583124058262182	0.479181369089626	0.758659217877095	0.5873702422145328
370	1.0	0.0	1.0	1.0	1.0	0.8166089965397924	0.18339100346020765	0.9234135667396062	0.8559837728194726	0.8884210526315789	0.9041687594173782	0.09583124058262182	0.479181369089626	0.758659217877095	0.5873702422145328
370	1.0	0.0	1.0	1.0	1.0	0.8166089965397924	0.18339100346020765	0.9234135667396062	0.8559837728194726	0.8884210526315789	0.9041687594173782	0.09583124058262182	0.479181369089626	0.758659217877095	0.5873702422145328
370	1.0	0.0	1.0	1.0	1.0	0.8166089965397924	0.18339100346020765	0.9234135667396062	0.8559837728194726	0.8884210526315789	0.9041687594173782	0.09583124058262182	0.479181369089626	0.758659217877095	0.5873702422145328
370	1.0	0.0	1.0	1.0	1.0	0.8166089965397924	0.18339100346020765	0.9234135667396062	0.8559837728194726	0.8884210526315789	0.9041687594173782	0.09583124058262182	0.479181369089626	0.758659217877095	0.5873702422145328
370	1.0	0.0	1.0	1.0	1.0	0.8166089965397924	0.18339100346020765	0.9234135667396062	0.8559837728194726	0.8884210526315789	0.9041687594173782	0.09583124058262182	0.479181369089626	0.758659217877095	0.5873702422145328
370	1.0	0.0	1.0	1.0	1.0	0.8166089965397924	0.18339100346020765	0.9234135667396062	0.8559837728194726	0.8884210526315789	0.9041687594173782	0.09583124058262182	0.479181369089626	0.758659217877095	0.5873702422145328
370	1.0	0.0	1.0	1.0	1.0	0.8166089965397924	0.18339100346020765	0.9234135667396062	0.8559837728194726	0.8884210526315789	0.9041687594173782	0.09583124058262182	0.479181369089626	0.758659217877095	0.5873702422145328
370	1.0	0.0	1.0	1.0	1.0	0.8166089965397924	0.18339100346020765	0.9234135667396062	0.8559837728194726	0.8884210526315789	0.9041687594173782	0.09583124058262182	0.479181369089626	0.758659217877095	0.5873702422145328
370	1.0	0.0	1.0	1.0	1.0	0.8166089965397924	0.18339100346020765	0.9234135667396062	0.8559837728194726	0.8884210526315789	0.9041687594173782	0.09583124058262182	0.479181369089626	0.758659217877095	0.5873702422145328
370	1.0	0.0	1.0	1.0	1.0	0.8166089965397924	0.18339100346020765	0.9234135667396062	0.8559837728194726	0.8884210526315789	0.9041687594173782	0.09583124058262182	0.479181369089626	0.758659217877095	0.5873702422145328
369	1.0	0.0	1.0	1.0	1.0	0.8373266078184111	0.16267339218158894	0.9555555555555556	0.8563300142247511	0.903225806451613	0.9198477209589464	0.0801522790410536	0.4550430023455825	0.8765060240963856	0.5990735975295934
369	1.0	0.0	1.0	1.0	1.0	0.8373266078184111	0.16267339218158894	0.9555555555555556	0.8563300142247511	0.903225806451613	0.9198477209589464	0.0801522790410536	0.4550430023455825	0.8765060240963856	0.5990735975295934
369	1.0	0.0	1.0	1.0	1.0	0.8373266078184111	0.16267339218158894	0.9555555555555556	0.8563300142247511	0.903225806451613	0.9198477209589464	0.0801522790410536	0.4550430023455825	0.8765060240963856	0.5990735975295934
369	1.0	0.0	1.0	1.0	1.0	0.8373266078184111	0.16267339218158894	0.9555555555555556	0.8563300142247511	0.903225806451613	0.9198477209589464	0.0801522790410536	0.4550430023455825	0.8765060240963856	0.5990735975295934
369	1.0	0.0	1.0	1.0	1.0	0.8373266078184111	0.16267339218158894	0.9555555555555556	0.8563300142247511	0.903225806451613	0.9198477209589464	0.0801522790410536	0.4550430023455825	0.8765060240963856	0.5990735975295934
369	1.0	0.0	1.0	1.0	1.0	0.8373266078184111	0.16267339218158894	0.9555555555555556	0.8563300142247511	0.903225806451613	0.9198477209589464	0.0801522790410536	0.4550430023455825	0.8765060240963856	0.5990735975295934
369	1.0	0.0	1.0	1.0	1.0	0.8373266078184111	0.16267339218158894	0.9555555555555556	0.8563300142247511	0.903225806451613	0.9198477209589464	0.0801522790410536	0.4550430023455825	0.8765060240963856	0.5990735975295934
369	1.0	0.0	1.0	1.0	1.0	0.8373266078184111	0.16267339218158894	0.9555555555555556	0.8563300142247511	0.903225806451613	0.9198477209589464	0.0801522790410536	0.4550430023455825	0.8765060240963856	0.5990735975295934
369	1.0	0.0	1.0	1.0	1.0	0.8373266078184111	0.16267339218158894	0.9555555555555556	0.8563300142247511	0.903225806451613	0.9198477209589464	0.0801522790410536	0.4550430023455825	0.8765060240963856	0.5990735975295934
369	1.0	0.0	1.0	1.0	1.0	0.8373266078184111	0.16267339218158894	0.9555555555555556	0.8563300142247511	0.903225806451613	0.9198477209589464	0.0801522790410536	0.4550430023455825	0.8765060240963856	0.5990735975295934
369	1.0	0.0	1.0	1.0	1.0	0.8373266078184111	0.16267339218158894	0.9555555555555556	0.8563300142247511	0.903225806451613	0.9198477209589464	0.0801522790410536	0.4550430023455825	0.8765060240963856	0.5990735975295934
369	1.0	0.0	1.0	1.0	1.0	0.8373266078184111	0.16267339218158894	0.9555555555555556	0.8563300142247511	0.903225806451613	0.9198477209589464	0.0801522790410536	0.4550430023455825	0.8765060240963856	0.5990735975295934
369	1.0	0.0	1.0	1.0	1.0	0.8373266078184111	0.16267339218158894	0.9555555555555556	0.8563300142247511	0.903225806451613	0.9198477209589464	0.0801522790410536	0.4550430023455825	0.8765060240963856	0.5990735975295934
369	1.0	0.0	1.0	1.0	1.0	0.8373266078184111	0.16267339218158894	0.9555555555555556	0.8563300142247511	0.903225806451613	0.9198477209589464	0.0801522790410536	0.4550430023455825	0.8765060240963856	0.5990735975295934
369	1.0	0.0	1.0	1.0	1.0	0.8373266078184111	0.16267339218158894	0.9555555555555556	0.8563300142247511	0.903225806451613	0.9198477209589464	0.0801522790410536	0.4550430023455825	0.8765060240963856	0.5990735975295934
369	1.0	0.0	1.0	1.0	1.0	0.8373266078184111	0.16267339218158894	0.9555555555555556	0.8563300142247511	0.903225806451613	0.9198477209589464	0.0801522790410536	0.4550430023455825	0.8765060240963856	0.5990735975295934
369	1.0	0.0	1.0	1.0	1.0	0.8373266078184111	0.16267339218158894	0.9555555555555556	0.8563300142247511	0.903225806451613	0.9198477209589464	0.0801522790410536	0.4550430023455825	0.8765060240963856	0.5990735975295934
369	1.0	0.0	1.0	1.0	1.0	0.8373266078184111	0.16267339218158894	0.9555555555555556	0.8563300142247511	0.903225806451613	0.9198477209589464	0.0801522790410536	0.4550430023455825	0.8765060240963856	0.5990735975295934
369	1.0	0.0	1.0	1.0	1.0	0.8373266078184111	0.16267339218158894	0.9555555555555556	0.8563300142247511	0.903225806451613	0.9198477209589464	0.0801522790410536	0.4550430023455825	0.8765060240963856	0.5990735975295934
369	1.0	0.0	1.0	1.0	1.0	0.8373266078184111	0.16267339218158894	0.9555555555555556	0.8563300142247511	0.903225806451613	0.9198477209589464	0.0801522790410536	0.4550430023455825	0.8765060240963856	0.5990735975295934
369	1.0	0.0	1.0	1.0	1.0	0.8373266078184111	0.16267339218158894	0.9555555555555556	0.8563300142247511	0.903225806451613	0.9198477209589464	0.0801522790410536	0.4550430023455825	0.8765060240963856	0.5990735975295934
369	1.0	0.0	1.0	1.0	1.0	0.8373266078184111	0.16267339218158894	0.9555555555555556	0.8563300142247511	0.903225806451613	0.9198477209589464	0.0801522790410536	0.4550430023455825	0.8765060240963856	0.5990735975295934
369	1.0	0.0	1.0	1.0	1.0	0.8373266078184111	0.16267339218158894	0.9555555555555556	0.8563300142247511	0.903225806451613	0.9198477209589464	0.0801522790410536	0.4550430023455825	0.8765060240963856	0.5990735975295934
369	1.0	0.0	1.0	1.0	1.0	0.8373266078184111	0.16267339218158894	0.9555555555555556	0.8563300142247511	0.903225806451613	0.9198477209589464	0.0801522790410536	0.4550430023455825	0.8765060240963856	0.5990735975295934
369	1.0	0.0	1.0	1.0	1.0	0.8373266078184111	0.16267339218158894	0.9555555555555556	0.8563300142247511	0.903225806451613	0.9198477209589464	0.0801522790410536	0.4550430023455825	0.8765060240963856	0.5990735975295934
369	1.0	0.0	1.0	1.0	1.0	0.8373266078184111	0.16267339218158894	0.9555555555555556	0.8563300142247511	0.903225806451613	0.9198477209589464	0.0801522790410536	0.4550430023455825	0.8765060240963856	0.5990735975295934
369	1.0	0.0	1.0	1.0	1.0	0.8373266078184111	0.16267339218158894	0.9555555555555556	0.8563300142247511	0.903225806451613	0.9198477209589464	0.0801522790410536	0.4550430023455825	0.8765060240963856	0.5990735975295934
369	1.0	0.0	1.0	1.0	1.0	0.8373266078184111	0.16267339218158894	0.9555555555555556	0.8563300142247511	0.903225806451613	0.9198477209589464	0.0801522790410536	0.4550430023455825	0.8765060240963856	0.5990735975295934
369	1.0	0.0	1.0	1.0	1.0	0.8373266078184111	0.16267339218158894	0.9555555555555556	0.8563300142247511	0.903225806451613	0.9198477209589464	0.0801522790410536	0.4550430023455825	0.8765060240963856	0.5990735975295934
369	1.0	0.0	1.0	1.0	1.0	0.8373266078184111	0.16267339218158894	0.9555555555555556	0.8563300142247511	0.903225806451613	0.9198477209589464	0.0801522790410536	0.4550430023455825	0.8765060240963856	0.5990735975295934
369	1.0	0.0	1.0	1.0	1.0	0.8373266078184111	0.16267339218158894	0.9555555555555556	0.8563300142247511	0.903225806451613	0.9198477209589464	0.0801522790410536	0.4550430023455825	0.8765060240963856	0.5990735975295934
369	1.0	0.0	1.0	1.0	1.0	0.8373266078184111	0.16267339218158894	0.9555555555555556	0.8563300142247511	0.903225806451613	0.9198477209589464	0.0801522790410536	0.4550430023455825	0.8765060240963856	0.5990735975295934
369	1.0	0.0	1.0	1.0	1.0	0.8373266078184111	0.16267339218158894	0.9555555555555556	0.8563300142247511	0.903225806451613	0.9198477209589464	0.0801522790410536	0.4550430023455825	0.8765060240963856	0.5990735975295934
369	1.0	0.0	1.0	1.0	1.0	0.8373266078184111	0.16267339218158894	0.9555555555555556	0.8563300142247511	0.903225806451613	0.9198477209589464	0.0801522790410536	0.4550430023455825	0.8765060240963856	0.5990735975295934
369	1.0	0.0	1.0	1.0	1.0	0.8373266078184111	0.16267339218158894	0.9555555555555556	0.8563300142247511	0.903225806451613	0.9198477209589464	0.0801522790410536	0.4550430023455825	0.8765060240963856	0.5990735975295934
369	1.0	0.0	1.0	1.0	1.0	0.8373266078184111	0.16267339218158894	0.9555555555555556	0.8563300142247511	0.903225806451613	0.9198477209589464	0.0801522790410536	0.4550430023455825	0.8765060240963856	0.5990735975295934
369	1.0	0.0	1.0	1.0	1.0	0.8373266078184111	0.16267339218158894	0.9555555555555556	0.8563300142247511	0.903225806451613	0.9198477209589464	0.0801522790410536	0.4550430023455825	0.8765060240963856	0.5990735975295934
369	1.0	0.0	1.0	1.0	1.0	0.8373266078184111	0.16267339218158894	0.9555555555555556	0.8563300142247511	0.903225806451613	0.9198477209589464	0.0801522790410536	0.4550430023455825	0.8765060240963856	0.5990735975295934
369	1.0	0.0	1.0	1.0	1.0	0.8373266078184111	0.16267339218158894	0.9555555555555556	0.8563300142247511	0.903225806451613	0.9198477209589464	0.0801522790410536	0.4550430023455825	0.8765060240963856	0.5990735975295934
378	1.0	0.0	1.0	1.0	1.0	0.8552147239263803	0.14478527607361968	0.9864661654135338	0.857516339869281	0.9174825174825175	0.9137008845916478	0.08629911540835222	0.42628650904033377	0.9776714513556619	0.5937046004842614
378	1.0	0.0	1.0	1.0	1.0	0.8552147239263803	0.14478527607361968	0.9864661654135338	0.857516339869281	0.9174825174825175	0.9137008845916478	0.08629911540835222	0.42628650904033377	0.9776714513556619	0.5937046004842614
378	1.0	0.0	1.0	1.0	1.0	0.8552147239263803	0.14478527607361968	0.9864661654135338	0.857516339869281	0.9174825174825175	0.9137008845916478	0.08629911540835222	0.42628650904033377	0.9776714513556619	0.5937046004842614
378	1.0	0.0	1.0	1.0	1.0	0.8552147239263803	0.14478527607361968	0.9864661654135338	0.857516339869281	0.9174825174825175	0.9137008845916478	0.08629911540835222	0.42628650904033377	0.9776714513556619	0.5937046004842614
378	1.0	0.0	1.0	1.0	1.0	0.8552147239263803	0.14478527607361968	0.9864661654135338	0.857516339869281	0.9174825174825175	0.9137008845916478	0.08629911540835222	0.42628650904033377	0.9776714513556619	0.5937046004842614
378	1.0	0.0	1.0	1.0	1.0	0.8552147239263803	0.14478527607361968	0.9864661654135338	0.857516339869281	0.9174825174825175	0.9137008845916478	0.08629911540835222	0.42628650904033377	0.9776714513556619	0.5937046004842614
378	1.0	0.0	1.0	1.0	1.0	0.8552147239263803	0.14478527607361968	0.9864661654135338	0.857516339869281	0.9174825174825175	0.9137008845916478	0.08629911540835222	0.42628650904033377	0.9776714513556619	0.5937046004842614
378	1.0	0.0	1.0	1.0	1.0	0.8552147239263803	0.14478527607361968	0.9864661654135338	0.857516339869281	0.9174825174825175	0.9137008845916478	0.08629911540835222	0.42628650904033377	0.9776714513556619	0.5937046004842614
378	1.0	0.0	1.0	1.0	1.0	0.8552147239263803	0.14478527607361968	0.9864661654135338	0.857516339869281	0.9174825174825175	0.9137008845916478	0.08629911540835222	0.42628650904033377	0.9776714513556619	0.5937046004842614
378	1.0	0.0	1.0	1.0	1.0	0.8552147239263803	0.14478527607361968	0.9864661654135338	0.857516339869281	0.9174825174825175	0.9137008845916478	0.08629911540835222	0.42628650904033377	0.9776714513556619	0.5937046004842614
378	1.0	0.0	1.0	1.0	1.0	0.8552147239263803	0.14478527607361968	0.9864661654135338	0.857516339869281	0.9174825174825175	0.9137008845916478	0.08629911540835222	0.42628650904033377	0.9776714513556619	0.5937046004842614
378	1.0	0.0	1.0	1.0	1.0	0.8552147239263803	0.14478527607361968	0.9864661654135338	0.857516339869281	0.9174825174825175	0.9137008845916478	0.08629911540835222	0.42628650904033377	0.9776714513556619	0.5937046004842614
378	1.0	0.0	1.0	1.0	1.0	0.8552147239263803	0.14478527607361968	0.9864661654135338	0.857516339869281	0.9174825174825175	0.9137008845916478	0.08629911540835222	0.42628650904033377	0.9776714513556619	0.5937046004842614
378	1.0	0.0	1.0	1.0	1.0	0.8552147239263803	0.14478527607361968	0.9864661654135338	0.857516339869281	0.9174825174825175	0.9137008845916478	0.08629911540835222	0.42628650904033377	0.9776714513556619	0.5937046004842614
378	1.0	0.0	1.0	1.0	1.0	0.8552147239263803	0.14478527607361968	0.9864661654135338	0.857516339869281	0.9174825174825175	0.9137008845916478	0.08629911540835222	0.42628650904033377	0.9776714513556619	0.5937046004842614
378	1.0	0.0	1.0	1.0	1.0	0.8552147239263803	0.14478527607361968	0.9864661654135338	0.857516339869281	0.9174825174825175	0.9137008845916478	0.08629911540835222	0.42628650904033377	0.9776714513556619	0.5937046004842614
378	1.0	0.0	1.0	1.0	1.0	0.8552147239263803	0.14478527607361968	0.9864661654135338	0.857516339869281	0.9174825174825175	0.9137008845916478	0.08629911540835222	0.42628650904033377	0.9776714513556619	0.5937046004842614
378	1.0	0.0	1.0	1.0	1.0	0.8552147239263803	0.14478527607361968	0.9864661654135338	0.857516339869281	0.9174825174825175	0.9137008845916478	0.08629911540835222	0.42628650904033377	0.9776714513556619	0.5937046004842614
378	1.0	0.0	1.0	1.0	1.0	0.8552147239263803	0.14478527607361968	0.9864661654135338	0.857516339869281	0.9174825174825175	0.9137008845916478	0.08629911540835222	0.42628650904033377	0.9776714513556619	0.5937046004842614
378	1.0	0.0	1.0	1.0	1.0	0.8552147239263803	0.14478527607361968	0.9864661654135338	0.857516339869281	0.9174825174825175	0.9137008845916478	0.08629911540835222	0.42628650904033377	0.9776714513556619	0.5937046004842614
378	1.0	0.0	1.0	1.0	1.0	0.8552147239263803	0.14478527607361968	0.9864661654135338	0.857516339869281	0.9174825174825175	0.9137008845916478	0.08629911540835222	0.42628650904033377	0.9776714513556619	0.5937046004842614
378	1.0	0.0	1.0	1.0	1.0	0.8552147239263803	0.14478527607361968	0.9864661654135338	0.857516339869281	0.9174825174825175	0.9137008845916478	0.08629911540835222	0.42628650904033377	0.9776714513556619	0.5937046004842614
378	1.0	0.0	1.0	1.0	1.0	0.8552147239263803	0.14478527607361968	0.9864661654135338	0.857516339869281	0.9174825174825175	0.9137008845916478	0.08629911540835222	0.42628650904033377	0.9776714513556619	0.5937046004842614
378	1.0	0.0	1.0	1.0	1.0	0.8552147239263803	0.14478527607361968	0.9864661654135338	0.857516339869281	0.9174825174825175	0.9137008845916478	0.08629911540835222	0.42628650904033377	0.9776714513556619	0.5937046004842614
378	1.0	0.0	1.0	1.0	1.0	0.8552147239263803	0.14478527607361968	0.9864661654135338	0.857516339869281	0.9174825174825175	0.9137008845916478	0.08629911540835222	0.42628650904033377	0.9776714513556619	0.5937046004842614
378	1.0	0.0	1.0	1.0	1.0	0.8552147239263803	0.14478527607361968	0.9864661654135338	0.857516339869281	0.9174825174825175	0.9137008845916478	0.08629911540835222	0.42628650904033377	0.9776714513556619	0.5937046004842614
378	1.0	0.0	1.0	1.0	1.0	0.8552147239263803	0.14478527607361968	0.9864661654135338	0.857516339869281	0.9174825174825175	0.9137008845916478	0.08629911540835222	0.42628650904033377	0.9776714513556619	0.5937046004842614
378	1.0	0.0	1.0	1.0	1.0	0.8552147239263803	0.14478527607361968	0.9864661654135338	0.857516339869281	0.9174825174825175	0.9137008845916478	0.08629911540835222	0.42628650904033377	0.9776714513556619	0.5937046004842614
378	1.0	0.0	1.0	1.0	1.0	0.8552147239263803	0.14478527607361968	0.9864661654135338	0.857516339869281	0.9174825174825175	0.9137008845916478	0.08629911540835222	0.42628650904033377	0.9776714513556619	0.5937046004842614
378	1.0	0.0	1.0	1.0	1.0	0.8552147239263803	0.14478527607361968	0.9864661654135338	0.857516339869281	0.9174825174825175	0.9137008845916478	0.08629911540835222	0.42628650904033377	0.9776714513556619	0.5937046004842614
378	1.0	0.0	1.0	1.0	1.0	0.8552147239263803	0.14478527607361968	0.9864661654135338	0.857516339869281	0.9174825174825175	0.9137008845916478	0.08629911540835222	0.42628650904033377	0.9776714513556619	0.5937046004842614
378	1.0	0.0	1.0	1.0	1.0	0.8552147239263803	0.14478527607361968	0.9864661654135338	0.857516339869281	0.9174825174825175	0.9137008845916478	0.08629911540835222	0.42628650904033377	0.9776714513556619	0.5937046004842614
378	1.0	0.0	1.0	1.0	1.0	0.8552147239263803	0.14478527607361968	0.9864661654135338	0.857516339869281	0.9174825174825175	0.9137008845916478	0.08629911540835222	0.42628650904033377	0.9776714513556619	0.5937046004842614
