# Supplementary material for: An Improved Hybrid Feature Selection Algorithm for Electric Charge Recovery Risk
Source: Hindawi journal article supplement (doi:10.1155/2020/8479341), 2020-08-28
Supplement: f1 [file 8479341.f1.zip › 8479341.f1/Experimental Results/201806/BPSO_SBS_results.csv]

features_num	Accuracy_high	Loss_high	Precission_high	Recall_high	F1_high	Accuracy_med	Loss_med	Precission_med	Recall_med	F1_med	Accuracy_low	Loss_low	Precission_low	Recall_low	F1_low
378	1	0	1	1	1	0.855036855	0.144963145	0.986445783	0.857329843	0.917366947	0.913812609	0.086187391	0.426981919	0.977707006	0.594385286
377	1	0	1	1	1	0.856265356	0.143734644	0.986466165	0.858638743	0.918124563	0.91370976	0.08629024	0.426685198	0.977707006	0.594097726
377	1	0	1	1	1	0.856265356	0.143734644	0.986466165	0.858638743	0.918124563	0.91370976	0.08629024	0.426685198	0.977707006	0.594097726
377	1	0	1	1	1	0.856265356	0.143734644	0.986466165	0.858638743	0.918124563	0.91370976	0.08629024	0.426685198	0.977707006	0.594097726
377	1	0	1	1	1	0.856265356	0.143734644	0.986466165	0.858638743	0.918124563	0.91370976	0.08629024	0.426685198	0.977707006	0.594097726
377	1	0	1	1	1	0.856265356	0.143734644	0.986466165	0.858638743	0.918124563	0.91370976	0.08629024	0.426685198	0.977707006	0.594097726
377	1	0	1	1	1	0.856265356	0.143734644	0.986466165	0.858638743	0.918124563	0.91370976	0.08629024	0.426685198	0.977707006	0.594097726
377	1	0	1	1	1	0.856265356	0.143734644	0.986466165	0.858638743	0.918124563	0.91370976	0.08629024	0.426685198	0.977707006	0.594097726
377	1	0	1	1	1	0.856265356	0.143734644	0.986466165	0.858638743	0.918124563	0.91370976	0.08629024	0.426685198	0.977707006	0.594097726
377	1	0	1	1	1	0.856265356	0.143734644	0.986466165	0.858638743	0.918124563	0.91370976	0.08629024	0.426685198	0.977707006	0.594097726
377	1	0	1	1	1	0.856265356	0.143734644	0.986466165	0.858638743	0.918124563	0.91370976	0.08629024	0.426685198	0.977707006	0.594097726
377	1	0	1	1	1	0.856265356	0.143734644	0.986466165	0.858638743	0.918124563	0.91370976	0.08629024	0.426685198	0.977707006	0.594097726
377	1	0	1	1	1	0.856265356	0.143734644	0.986466165	0.858638743	0.918124563	0.91370976	0.08629024	0.426685198	0.977707006	0.594097726
377	1	0	1	1	1	0.856265356	0.143734644	0.986466165	0.858638743	0.918124563	0.91370976	0.08629024	0.426685198	0.977707006	0.594097726
377	1	0	1	1	1	0.856265356	0.143734644	0.986466165	0.858638743	0.918124563	0.91370976	0.08629024	0.426685198	0.977707006	0.594097726
377	1	0	1	1	1	0.856265356	0.143734644	0.986466165	0.858638743	0.918124563	0.91370976	0.08629024	0.426685198	0.977707006	0.594097726
377	1	0	1	1	1	0.856265356	0.143734644	0.986466165	0.858638743	0.918124563	0.91370976	0.08629024	0.426685198	0.977707006	0.594097726
377	1	0	1	1	1	0.856265356	0.143734644	0.986466165	0.858638743	0.918124563	0.91370976	0.08629024	0.426685198	0.977707006	0.594097726
377	1	0	1	1	1	0.856265356	0.143734644	0.986466165	0.858638743	0.918124563	0.91370976	0.08629024	0.426685198	0.977707006	0.594097726
377	1	0	1	1	1	0.856265356	0.143734644	0.986466165	0.858638743	0.918124563	0.91370976	0.08629024	0.426685198	0.977707006	0.594097726
377	1	0	1	1	1	0.856265356	0.143734644	0.986466165	0.858638743	0.918124563	0.91370976	0.08629024	0.426685198	0.977707006	0.594097726
377	1	0	1	1	1	0.856265356	0.143734644	0.986466165	0.858638743	0.918124563	0.91370976	0.08629024	0.426685198	0.977707006	0.594097726
377	1	0	1	1	1	0.856265356	0.143734644	0.986466165	0.858638743	0.918124563	0.91370976	0.08629024	0.426685198	0.977707006	0.594097726
377	1	0	1	1	1	0.856265356	0.143734644	0.986466165	0.858638743	0.918124563	0.91370976	0.08629024	0.426685198	0.977707006	0.594097726
377	1	0	1	1	1	0.856265356	0.143734644	0.986466165	0.858638743	0.918124563	0.91370976	0.08629024	0.426685198	0.977707006	0.594097726
377	1	0	1	1	1	0.856265356	0.143734644	0.986466165	0.858638743	0.918124563	0.91370976	0.08629024	0.426685198	0.977707006	0.594097726
377	1	0	1	1	1	0.856265356	0.143734644	0.986466165	0.858638743	0.918124563	0.91370976	0.08629024	0.426685198	0.977707006	0.594097726
377	1	0	1	1	1	0.856265356	0.143734644	0.986466165	0.858638743	0.918124563	0.91370976	0.08629024	0.426685198	0.977707006	0.594097726
377	1	0	1	1	1	0.856265356	0.143734644	0.986466165	0.858638743	0.918124563	0.91370976	0.08629024	0.426685198	0.977707006	0.594097726
377	1	0	1	1	1	0.856265356	0.143734644	0.986466165	0.858638743	0.918124563	0.91370976	0.08629024	0.426685198	0.977707006	0.594097726
376	1	0	1	1	1	0.856966708	0.143033292	0.986445783	0.859580052	0.918653576	0.913942011	0.086057989	0.428075052	0.977777778	0.595456742
375	1	0	1	1	1	0.856966708	0.143033292	0.986445783	0.859580052	0.918653576	0.913942011	0.086057989	0.428075052	0.977777778	0.595456742
375	1	0	1	1	1	0.856966708	0.143033292	0.986445783	0.859580052	0.918653576	0.913942011	0.086057989	0.428075052	0.977777778	0.595456742
375	1	0	1	1	1	0.856966708	0.143033292	0.986445783	0.859580052	0.918653576	0.913942011	0.086057989	0.428075052	0.977777778	0.595456742
375	1	0	1	1	1	0.856966708	0.143033292	0.986445783	0.859580052	0.918653576	0.913942011	0.086057989	0.428075052	0.977777778	0.595456742
375	1	0	1	1	1	0.856966708	0.143033292	0.986445783	0.859580052	0.918653576	0.913942011	0.086057989	0.428075052	0.977777778	0.595456742
375	1	0	1	1	1	0.856966708	0.143033292	0.986445783	0.859580052	0.918653576	0.913942011	0.086057989	0.428075052	0.977777778	0.595456742
375	1	0	1	1	1	0.856966708	0.143033292	0.986445783	0.859580052	0.918653576	0.913942011	0.086057989	0.428075052	0.977777778	0.595456742
374	1	0	1	1	1	0.858024691	0.141975309	0.986445783	0.860709593	0.919298246	0.914053665	0.085946335	0.428769979	0.977812995	0.596135266
374	1	0	1	1	1	0.858024691	0.141975309	0.986445783	0.860709593	0.919298246	0.914053665	0.085946335	0.428769979	0.977812995	0.596135266
374	1	0	1	1	1	0.858024691	0.141975309	0.986445783	0.860709593	0.919298246	0.914053665	0.085946335	0.428769979	0.977812995	0.596135266
374	1	0	1	1	1	0.858024691	0.141975309	0.986445783	0.860709593	0.919298246	0.914053665	0.085946335	0.428769979	0.977812995	0.596135266
374	1	0	1	1	1	0.858024691	0.141975309	0.986445783	0.860709593	0.919298246	0.914053665	0.085946335	0.428769979	0.977812995	0.596135266
374	1	0	1	1	1	0.858024691	0.141975309	0.986445783	0.860709593	0.919298246	0.914053665	0.085946335	0.428769979	0.977812995	0.596135266
374	1	0	1	1	1	0.858024691	0.141975309	0.986445783	0.860709593	0.919298246	0.914053665	0.085946335	0.428769979	0.977812995	0.596135266
374	1	0	1	1	1	0.858024691	0.141975309	0.986445783	0.860709593	0.919298246	0.914053665	0.085946335	0.428769979	0.977812995	0.596135266
374	1	0	1	1	1	0.858024691	0.141975309	0.986445783	0.860709593	0.919298246	0.914053665	0.085946335	0.428769979	0.977812995	0.596135266
374	1	0	1	1	1	0.858024691	0.141975309	0.986445783	0.860709593	0.919298246	0.914053665	0.085946335	0.428769979	0.977812995	0.596135266
374	1	0	1	1	1	0.858024691	0.141975309	0.986445783	0.860709593	0.919298246	0.914053665	0.085946335	0.428769979	0.977812995	0.596135266
374	1	0	1	1	1	0.858024691	0.141975309	0.986445783	0.860709593	0.919298246	0.914053665	0.085946335	0.428769979	0.977812995	0.596135266
374	1	0	1	1	1	0.858024691	0.141975309	0.986445783	0.860709593	0.919298246	0.914053665	0.085946335	0.428769979	0.977812995	0.596135266
374	1	0	1	1	1	0.858024691	0.141975309	0.986445783	0.860709593	0.919298246	0.914053665	0.085946335	0.428769979	0.977812995	0.596135266
374	1	0	1	1	1	0.858024691	0.141975309	0.986445783	0.860709593	0.919298246	0.914053665	0.085946335	0.428769979	0.977812995	0.596135266
374	1	0	1	1	1	0.858024691	0.141975309	0.986445783	0.860709593	0.919298246	0.914053665	0.085946335	0.428769979	0.977812995	0.596135266
374	1	0	1	1	1	0.858024691	0.141975309	0.986445783	0.860709593	0.919298246	0.914053665	0.085946335	0.428769979	0.977812995	0.596135266
374	1	0	1	1	1	0.858024691	0.141975309	0.986445783	0.860709593	0.919298246	0.914053665	0.085946335	0.428769979	0.977812995	0.596135266
374	1	0	1	1	1	0.858024691	0.141975309	0.986445783	0.860709593	0.919298246	0.914053665	0.085946335	0.428769979	0.977812995	0.596135266
374	1	0	1	1	1	0.858024691	0.141975309	0.986445783	0.860709593	0.919298246	0.914053665	0.085946335	0.428769979	0.977812995	0.596135266
374	1	0	1	1	1	0.858024691	0.141975309	0.986445783	0.860709593	0.919298246	0.914053665	0.085946335	0.428769979	0.977812995	0.596135266
374	1	0	1	1	1	0.858024691	0.141975309	0.986445783	0.860709593	0.919298246	0.914053665	0.085946335	0.428769979	0.977812995	0.596135266
374	1	0	1	1	1	0.858024691	0.141975309	0.986445783	0.860709593	0.919298246	0.914053665	0.085946335	0.428769979	0.977812995	0.596135266
374	1	0	1	1	1	0.858024691	0.141975309	0.986445783	0.860709593	0.919298246	0.914053665	0.085946335	0.428769979	0.977812995	0.596135266
374	1	0	1	1	1	0.858024691	0.141975309	0.986445783	0.860709593	0.919298246	0.914053665	0.085946335	0.428769979	0.977812995	0.596135266
374	1	0	1	1	1	0.858024691	0.141975309	0.986445783	0.860709593	0.919298246	0.914053665	0.085946335	0.428769979	0.977812995	0.596135266
374	1	0	1	1	1	0.858024691	0.141975309	0.986445783	0.860709593	0.919298246	0.914053665	0.085946335	0.428769979	0.977812995	0.596135266
374	1	0	1	1	1	0.858024691	0.141975309	0.986445783	0.860709593	0.919298246	0.914053665	0.085946335	0.428769979	0.977812995	0.596135266
374	1	0	1	1	1	0.858024691	0.141975309	0.986445783	0.860709593	0.919298246	0.914053665	0.085946335	0.428769979	0.977812995	0.596135266
374	1	0	1	1	1	0.858024691	0.141975309	0.986445783	0.860709593	0.919298246	0.914053665	0.085946335	0.428769979	0.977812995	0.596135266
374	1	0	1	1	1	0.858024691	0.141975309	0.986445783	0.860709593	0.919298246	0.914053665	0.085946335	0.428769979	0.977812995	0.596135266
374	1	0	1	1	1	0.858024691	0.141975309	0.986445783	0.860709593	0.919298246	0.914053665	0.085946335	0.428769979	0.977812995	0.596135266
374	1	0	1	1	1	0.858024691	0.141975309	0.986445783	0.860709593	0.919298246	0.914053665	0.085946335	0.428769979	0.977812995	0.596135266
374	1	0	1	1	1	0.858024691	0.141975309	0.986445783	0.860709593	0.919298246	0.914053665	0.085946335	0.428769979	0.977812995	0.596135266
374	1	0	1	1	1	0.858024691	0.141975309	0.986445783	0.860709593	0.919298246	0.914053665	0.085946335	0.428769979	0.977812995	0.596135266
374	1	0	1	1	1	0.858024691	0.141975309	0.986445783	0.860709593	0.919298246	0.914053665	0.085946335	0.428769979	0.977812995	0.596135266
374	1	0	1	1	1	0.858024691	0.141975309	0.986445783	0.860709593	0.919298246	0.914053665	0.085946335	0.428769979	0.977812995	0.596135266
374	1	0	1	1	1	0.858024691	0.141975309	0.986445783	0.860709593	0.919298246	0.914053665	0.085946335	0.428769979	0.977812995	0.596135266
374	1	0	1	1	1	0.858024691	0.141975309	0.986445783	0.860709593	0.919298246	0.914053665	0.085946335	0.428769979	0.977812995	0.596135266
374	1	0	1	1	1	0.858024691	0.141975309	0.986445783	0.860709593	0.919298246	0.914053665	0.085946335	0.428769979	0.977812995	0.596135266
374	1	0	1	1	1	0.858024691	0.141975309	0.986445783	0.860709593	0.919298246	0.914053665	0.085946335	0.428769979	0.977812995	0.596135266
374	1	0	1	1	1	0.858024691	0.141975309	0.986445783	0.860709593	0.919298246	0.914053665	0.085946335	0.428769979	0.977812995	0.596135266
374	1	0	1	1	1	0.858024691	0.141975309	0.986445783	0.860709593	0.919298246	0.914053665	0.085946335	0.428769979	0.977812995	0.596135266
374	1	0	1	1	1	0.858024691	0.141975309	0.986445783	0.860709593	0.919298246	0.914053665	0.085946335	0.428769979	0.977812995	0.596135266
374	1	0	1	1	1	0.858024691	0.141975309	0.986445783	0.860709593	0.919298246	0.914053665	0.085946335	0.428769979	0.977812995	0.596135266
374	1	0	1	1	1	0.858024691	0.141975309	0.986445783	0.860709593	0.919298246	0.914053665	0.085946335	0.428769979	0.977812995	0.596135266
374	1	0	1	1	1	0.858024691	0.141975309	0.986445783	0.860709593	0.919298246	0.914053665	0.085946335	0.428769979	0.977812995	0.596135266
374	1	0	1	1	1	0.858024691	0.141975309	0.986445783	0.860709593	0.919298246	0.914053665	0.085946335	0.428769979	0.977812995	0.596135266
374	1	0	1	1	1	0.858024691	0.141975309	0.986445783	0.860709593	0.919298246	0.914053665	0.085946335	0.428769979	0.977812995	0.596135266
374	1	0	1	1	1	0.858024691	0.141975309	0.986445783	0.860709593	0.919298246	0.914053665	0.085946335	0.428769979	0.977812995	0.596135266
374	1	0	1	1	1	0.858024691	0.141975309	0.986445783	0.860709593	0.919298246	0.914053665	0.085946335	0.428769979	0.977812995	0.596135266
374	1	0	1	1	1	0.858024691	0.141975309	0.986445783	0.860709593	0.919298246	0.914053665	0.085946335	0.428769979	0.977812995	0.596135266
374	1	0	1	1	1	0.858024691	0.141975309	0.986445783	0.860709593	0.919298246	0.914053665	0.085946335	0.428769979	0.977812995	0.596135266
374	1	0	1	1	1	0.858024691	0.141975309	0.986445783	0.860709593	0.919298246	0.914053665	0.085946335	0.428769979	0.977812995	0.596135266
374	1	0	1	1	1	0.858024691	0.141975309	0.986445783	0.860709593	0.919298246	0.914053665	0.085946335	0.428769979	0.977812995	0.596135266
374	1	0	1	1	1	0.858024691	0.141975309	0.986445783	0.860709593	0.919298246	0.914053665	0.085946335	0.428769979	0.977812995	0.596135266
374	1	0	1	1	1	0.858024691	0.141975309	0.986445783	0.860709593	0.919298246	0.914053665	0.085946335	0.428769979	0.977812995	0.596135266
374	1	0	1	1	1	0.858024691	0.141975309	0.986445783	0.860709593	0.919298246	0.914053665	0.085946335	0.428769979	0.977812995	0.596135266
374	1	0	1	1	1	0.858024691	0.141975309	0.986445783	0.860709593	0.919298246	0.914053665	0.085946335	0.428769979	0.977812995	0.596135266
374	1	0	1	1	1	0.858024691	0.141975309	0.986445783	0.860709593	0.919298246	0.914053665	0.085946335	0.428769979	0.977812995	0.596135266
374	1	0	1	1	1	0.858024691	0.141975309	0.986445783	0.860709593	0.919298246	0.914053665	0.085946335	0.428769979	0.977812995	0.596135266
374	1	0	1	1	1	0.858024691	0.141975309	0.986445783	0.860709593	0.919298246	0.914053665	0.085946335	0.428769979	0.977812995	0.596135266
374	1	0	1	1	1	0.858024691	0.141975309	0.986445783	0.860709593	0.919298246	0.914053665	0.085946335	0.428769979	0.977812995	0.596135266
374	1	0	1	1	1	0.858024691	0.141975309	0.986445783	0.860709593	0.919298246	0.914053665	0.085946335	0.428769979	0.977812995	0.596135266
374	1	0	1	1	1	0.858024691	0.141975309	0.986445783	0.860709593	0.919298246	0.914053665	0.085946335	0.428769979	0.977812995	0.596135266
374	1	0	1	1	1	0.858024691	0.141975309	0.986445783	0.860709593	0.919298246	0.914053665	0.085946335	0.428769979	0.977812995	0.596135266
374	1	0	1	1	1	0.858024691	0.141975309	0.986445783	0.860709593	0.919298246	0.914053665	0.085946335	0.428769979	0.977812995	0.596135266
374	1	0	1	1	1	0.858024691	0.141975309	0.986445783	0.860709593	0.919298246	0.914053665	0.085946335	0.428769979	0.977812995	0.596135266
374	1	0	1	1	1	0.858024691	0.141975309	0.986445783	0.860709593	0.919298246	0.914053665	0.085946335	0.428769979	0.977812995	0.596135266
374	1	0	1	1	1	0.858024691	0.141975309	0.986445783	0.860709593	0.919298246	0.914053665	0.085946335	0.428769979	0.977812995	0.596135266
374	1	0	1	1	1	0.858024691	0.141975309	0.986445783	0.860709593	0.919298246	0.914053665	0.085946335	0.428769979	0.977812995	0.596135266
374	1	0	1	1	1	0.858024691	0.141975309	0.986445783	0.860709593	0.919298246	0.914053665	0.085946335	0.428769979	0.977812995	0.596135266
373	1	0	1	1	1	0.859801489	0.140198511	0.987933635	0.861842105	0.920590302	0.913780701	0.086219299	0.428274428	0.977848101	0.595662651
373	1	0	1	1	1	0.859801489	0.140198511	0.987933635	0.861842105	0.920590302	0.913780701	0.086219299	0.428274428	0.977848101	0.595662651
373	1	0	1	1	1	0.859801489	0.140198511	0.987933635	0.861842105	0.920590302	0.913780701	0.086219299	0.428274428	0.977848101	0.595662651
373	1	0	1	1	1	0.859801489	0.140198511	0.987933635	0.861842105	0.920590302	0.913780701	0.086219299	0.428274428	0.977848101	0.595662651
373	1	0	1	1	1	0.859801489	0.140198511	0.987933635	0.861842105	0.920590302	0.913780701	0.086219299	0.428274428	0.977848101	0.595662651
373	1	0	1	1	1	0.859801489	0.140198511	0.987933635	0.861842105	0.920590302	0.913780701	0.086219299	0.428274428	0.977848101	0.595662651
373	1	0	1	1	1	0.859801489	0.140198511	0.987933635	0.861842105	0.920590302	0.913780701	0.086219299	0.428274428	0.977848101	0.595662651
373	1	0	1	1	1	0.859801489	0.140198511	0.987933635	0.861842105	0.920590302	0.913780701	0.086219299	0.428274428	0.977848101	0.595662651
373	1	0	1	1	1	0.859801489	0.140198511	0.987933635	0.861842105	0.920590302	0.913780701	0.086219299	0.428274428	0.977848101	0.595662651
373	1	0	1	1	1	0.859801489	0.140198511	0.987933635	0.861842105	0.920590302	0.913780701	0.086219299	0.428274428	0.977848101	0.595662651
373	1	0	1	1	1	0.859801489	0.140198511	0.987933635	0.861842105	0.920590302	0.913780701	0.086219299	0.428274428	0.977848101	0.595662651
373	1	0	1	1	1	0.859801489	0.140198511	0.987933635	0.861842105	0.920590302	0.913780701	0.086219299	0.428274428	0.977848101	0.595662651
373	1	0	1	1	1	0.859801489	0.140198511	0.987933635	0.861842105	0.920590302	0.913780701	0.086219299	0.428274428	0.977848101	0.595662651
373	1	0	1	1	1	0.859801489	0.140198511	0.987933635	0.861842105	0.920590302	0.913780701	0.086219299	0.428274428	0.977848101	0.595662651
373	1	0	1	1	1	0.859801489	0.140198511	0.987933635	0.861842105	0.920590302	0.913780701	0.086219299	0.428274428	0.977848101	0.595662651
373	1	0	1	1	1	0.859801489	0.140198511	0.987933635	0.861842105	0.920590302	0.913780701	0.086219299	0.428274428	0.977848101	0.595662651
373	1	0	1	1	1	0.859801489	0.140198511	0.987933635	0.861842105	0.920590302	0.913780701	0.086219299	0.428274428	0.977848101	0.595662651
373	1	0	1	1	1	0.859801489	0.140198511	0.987933635	0.861842105	0.920590302	0.913780701	0.086219299	0.428274428	0.977848101	0.595662651
373	1	0	1	1	1	0.859801489	0.140198511	0.987933635	0.861842105	0.920590302	0.913780701	0.086219299	0.428274428	0.977848101	0.595662651
373	1	0	1	1	1	0.859801489	0.140198511	0.987933635	0.861842105	0.920590302	0.913780701	0.086219299	0.428274428	0.977848101	0.595662651
373	1	0	1	1	1	0.859801489	0.140198511	0.987933635	0.861842105	0.920590302	0.913780701	0.086219299	0.428274428	0.977848101	0.595662651
373	1	0	1	1	1	0.859801489	0.140198511	0.987933635	0.861842105	0.920590302	0.913780701	0.086219299	0.428274428	0.977848101	0.595662651
373	1	0	1	1	1	0.859801489	0.140198511	0.987933635	0.861842105	0.920590302	0.913780701	0.086219299	0.428274428	0.977848101	0.595662651
373	1	0	1	1	1	0.859801489	0.140198511	0.987933635	0.861842105	0.920590302	0.913780701	0.086219299	0.428274428	0.977848101	0.595662651
373	1	0	1	1	1	0.859801489	0.140198511	0.987933635	0.861842105	0.920590302	0.913780701	0.086219299	0.428274428	0.977848101	0.595662651
373	1	0	1	1	1	0.859801489	0.140198511	0.987933635	0.861842105	0.920590302	0.913780701	0.086219299	0.428274428	0.977848101	0.595662651
373	1	0	1	1	1	0.859801489	0.140198511	0.987933635	0.861842105	0.920590302	0.913780701	0.086219299	0.428274428	0.977848101	0.595662651
373	1	0	1	1	1	0.859801489	0.140198511	0.987933635	0.861842105	0.920590302	0.913780701	0.086219299	0.428274428	0.977848101	0.595662651
373	1	0	1	1	1	0.859801489	0.140198511	0.987933635	0.861842105	0.920590302	0.913780701	0.086219299	0.428274428	0.977848101	0.595662651
373	1	0	1	1	1	0.859801489	0.140198511	0.987933635	0.861842105	0.920590302	0.913780701	0.086219299	0.428274428	0.977848101	0.595662651
373	1	0	1	1	1	0.859801489	0.140198511	0.987933635	0.861842105	0.920590302	0.913780701	0.086219299	0.428274428	0.977848101	0.595662651
373	1	0	1	1	1	0.859801489	0.140198511	0.987933635	0.861842105	0.920590302	0.913780701	0.086219299	0.428274428	0.977848101	0.595662651
373	1	0	1	1	1	0.859801489	0.140198511	0.987933635	0.861842105	0.920590302	0.913780701	0.086219299	0.428274428	0.977848101	0.595662651
373	1	0	1	1	1	0.859801489	0.140198511	0.987933635	0.861842105	0.920590302	0.913780701	0.086219299	0.428274428	0.977848101	0.595662651
373	1	0	1	1	1	0.859801489	0.140198511	0.987933635	0.861842105	0.920590302	0.913780701	0.086219299	0.428274428	0.977848101	0.595662651
373	1	0	1	1	1	0.859801489	0.140198511	0.987933635	0.861842105	0.920590302	0.913780701	0.086219299	0.428274428	0.977848101	0.595662651
373	1	0	1	1	1	0.859801489	0.140198511	0.987933635	0.861842105	0.920590302	0.913780701	0.086219299	0.428274428	0.977848101	0.595662651
373	1	0	1	1	1	0.859801489	0.140198511	0.987933635	0.861842105	0.920590302	0.913780701	0.086219299	0.428274428	0.977848101	0.595662651
373	1	0	1	1	1	0.859801489	0.140198511	0.987933635	0.861842105	0.920590302	0.913780701	0.086219299	0.428274428	0.977848101	0.595662651
373	1	0	1	1	1	0.859801489	0.140198511	0.987933635	0.861842105	0.920590302	0.913780701	0.086219299	0.428274428	0.977848101	0.595662651
373	1	0	1	1	1	0.859801489	0.140198511	0.987933635	0.861842105	0.920590302	0.913780701	0.086219299	0.428274428	0.977848101	0.595662651
373	1	0	1	1	1	0.859801489	0.140198511	0.987933635	0.861842105	0.920590302	0.913780701	0.086219299	0.428274428	0.977848101	0.595662651
373	1	0	1	1	1	0.859801489	0.140198511	0.987933635	0.861842105	0.920590302	0.913780701	0.086219299	0.428274428	0.977848101	0.595662651
373	1	0	1	1	1	0.859801489	0.140198511	0.987933635	0.861842105	0.920590302	0.913780701	0.086219299	0.428274428	0.977848101	0.595662651
373	1	0	1	1	1	0.859801489	0.140198511	0.987933635	0.861842105	0.920590302	0.913780701	0.086219299	0.428274428	0.977848101	0.595662651
373	1	0	1	1	1	0.859801489	0.140198511	0.987933635	0.861842105	0.920590302	0.913780701	0.086219299	0.428274428	0.977848101	0.595662651
373	1	0	1	1	1	0.859801489	0.140198511	0.987933635	0.861842105	0.920590302	0.913780701	0.086219299	0.428274428	0.977848101	0.595662651
373	1	0	1	1	1	0.859801489	0.140198511	0.987933635	0.861842105	0.920590302	0.913780701	0.086219299	0.428274428	0.977848101	0.595662651
373	1	0	1	1	1	0.859801489	0.140198511	0.987933635	0.861842105	0.920590302	0.913780701	0.086219299	0.428274428	0.977848101	0.595662651
373	1	0	1	1	1	0.859801489	0.140198511	0.987933635	0.861842105	0.920590302	0.913780701	0.086219299	0.428274428	0.977848101	0.595662651
373	1	0	1	1	1	0.859801489	0.140198511	0.987933635	0.861842105	0.920590302	0.913780701	0.086219299	0.428274428	0.977848101	0.595662651
373	1	0	1	1	1	0.859801489	0.140198511	0.987933635	0.861842105	0.920590302	0.913780701	0.086219299	0.428274428	0.977848101	0.595662651
373	1	0	1	1	1	0.859801489	0.140198511	0.987933635	0.861842105	0.920590302	0.913780701	0.086219299	0.428274428	0.977848101	0.595662651
373	1	0	1	1	1	0.859801489	0.140198511	0.987933635	0.861842105	0.920590302	0.913780701	0.086219299	0.428274428	0.977848101	0.595662651
373	1	0	1	1	1	0.859801489	0.140198511	0.987933635	0.861842105	0.920590302	0.913780701	0.086219299	0.428274428	0.977848101	0.595662651
373	1	0	1	1	1	0.859801489	0.140198511	0.987933635	0.861842105	0.920590302	0.913780701	0.086219299	0.428274428	0.977848101	0.595662651
373	1	0	1	1	1	0.859801489	0.140198511	0.987933635	0.861842105	0.920590302	0.913780701	0.086219299	0.428274428	0.977848101	0.595662651
373	1	0	1	1	1	0.859801489	0.140198511	0.987933635	0.861842105	0.920590302	0.913780701	0.086219299	0.428274428	0.977848101	0.595662651
373	1	0	1	1	1	0.859801489	0.140198511	0.987933635	0.861842105	0.920590302	0.913780701	0.086219299	0.428274428	0.977848101	0.595662651
373	1	0	1	1	1	0.859801489	0.140198511	0.987933635	0.861842105	0.920590302	0.913780701	0.086219299	0.428274428	0.977848101	0.595662651
373	1	0	1	1	1	0.859801489	0.140198511	0.987933635	0.861842105	0.920590302	0.913780701	0.086219299	0.428274428	0.977848101	0.595662651
373	1	0	1	1	1	0.859801489	0.140198511	0.987933635	0.861842105	0.920590302	0.913780701	0.086219299	0.428274428	0.977848101	0.595662651
373	1	0	1	1	1	0.859801489	0.140198511	0.987933635	0.861842105	0.920590302	0.913780701	0.086219299	0.428274428	0.977848101	0.595662651
373	1	0	1	1	1	0.859801489	0.140198511	0.987933635	0.861842105	0.920590302	0.913780701	0.086219299	0.428274428	0.977848101	0.595662651
373	1	0	1	1	1	0.859801489	0.140198511	0.987933635	0.861842105	0.920590302	0.913780701	0.086219299	0.428274428	0.977848101	0.595662651
373	1	0	1	1	1	0.859801489	0.140198511	0.987933635	0.861842105	0.920590302	0.913780701	0.086219299	0.428274428	0.977848101	0.595662651
373	1	0	1	1	1	0.859801489	0.140198511	0.987933635	0.861842105	0.920590302	0.913780701	0.086219299	0.428274428	0.977848101	0.595662651
373	1	0	1	1	1	0.859801489	0.140198511	0.987933635	0.861842105	0.920590302	0.913780701	0.086219299	0.428274428	0.977848101	0.595662651
373	1	0	1	1	1	0.859801489	0.140198511	0.987933635	0.861842105	0.920590302	0.913780701	0.086219299	0.428274428	0.977848101	0.595662651
373	1	0	1	1	1	0.859801489	0.140198511	0.987933635	0.861842105	0.920590302	0.913780701	0.086219299	0.428274428	0.977848101	0.595662651
373	1	0	1	1	1	0.859801489	0.140198511	0.987933635	0.861842105	0.920590302	0.913780701	0.086219299	0.428274428	0.977848101	0.595662651
373	1	0	1	1	1	0.859801489	0.140198511	0.987933635	0.861842105	0.920590302	0.913780701	0.086219299	0.428274428	0.977848101	0.595662651
373	1	0	1	1	1	0.859801489	0.140198511	0.987933635	0.861842105	0.920590302	0.913780701	0.086219299	0.428274428	0.977848101	0.595662651
373	1	0	1	1	1	0.859801489	0.140198511	0.987933635	0.861842105	0.920590302	0.913780701	0.086219299	0.428274428	0.977848101	0.595662651
373	1	0	1	1	1	0.859801489	0.140198511	0.987933635	0.861842105	0.920590302	0.913780701	0.086219299	0.428274428	0.977848101	0.595662651
373	1	0	1	1	1	0.859801489	0.140198511	0.987933635	0.861842105	0.920590302	0.913780701	0.086219299	0.428274428	0.977848101	0.595662651
373	1	0	1	1	1	0.859801489	0.140198511	0.987933635	0.861842105	0.920590302	0.913780701	0.086219299	0.428274428	0.977848101	0.595662651
373	1	0	1	1	1	0.859801489	0.140198511	0.987933635	0.861842105	0.920590302	0.913780701	0.086219299	0.428274428	0.977848101	0.595662651
373	1	0	1	1	1	0.859801489	0.140198511	0.987933635	0.861842105	0.920590302	0.913780701	0.086219299	0.428274428	0.977848101	0.595662651
373	1	0	1	1	1	0.859801489	0.140198511	0.987933635	0.861842105	0.920590302	0.913780701	0.086219299	0.428274428	0.977848101	0.595662651
373	1	0	1	1	1	0.859801489	0.140198511	0.987933635	0.861842105	0.920590302	0.913780701	0.086219299	0.428274428	0.977848101	0.595662651
373	1	0	1	1	1	0.859801489	0.140198511	0.987933635	0.861842105	0.920590302	0.913780701	0.086219299	0.428274428	0.977848101	0.595662651
373	1	0	1	1	1	0.859801489	0.140198511	0.987933635	0.861842105	0.920590302	0.913780701	0.086219299	0.428274428	0.977848101	0.595662651
373	1	0	1	1	1	0.859801489	0.140198511	0.987933635	0.861842105	0.920590302	0.913780701	0.086219299	0.428274428	0.977848101	0.595662651
373	1	0	1	1	1	0.859801489	0.140198511	0.987933635	0.861842105	0.920590302	0.913780701	0.086219299	0.428274428	0.977848101	0.595662651
373	1	0	1	1	1	0.859801489	0.140198511	0.987933635	0.861842105	0.920590302	0.913780701	0.086219299	0.428274428	0.977848101	0.595662651
373	1	0	1	1	1	0.859801489	0.140198511	0.987933635	0.861842105	0.920590302	0.913780701	0.086219299	0.428274428	0.977848101	0.595662651
373	1	0	1	1	1	0.859801489	0.140198511	0.987933635	0.861842105	0.920590302	0.913780701	0.086219299	0.428274428	0.977848101	0.595662651
373	1	0	1	1	1	0.859801489	0.140198511	0.987933635	0.861842105	0.920590302	0.913780701	0.086219299	0.428274428	0.977848101	0.595662651
373	1	0	1	1	1	0.859801489	0.140198511	0.987933635	0.861842105	0.920590302	0.913780701	0.086219299	0.428274428	0.977848101	0.595662651
373	1	0	1	1	1	0.859801489	0.140198511	0.987933635	0.861842105	0.920590302	0.913780701	0.086219299	0.428274428	0.977848101	0.595662651
373	1	0	1	1	1	0.859801489	0.140198511	0.987933635	0.861842105	0.920590302	0.913780701	0.086219299	0.428274428	0.977848101	0.595662651
373	1	0	1	1	1	0.859801489	0.140198511	0.987933635	0.861842105	0.920590302	0.913780701	0.086219299	0.428274428	0.977848101	0.595662651
373	1	0	1	1	1	0.859801489	0.140198511	0.987933635	0.861842105	0.920590302	0.913780701	0.086219299	0.428274428	0.977848101	0.595662651
372	1	0	1	1	1	0.858560794	0.141439206	0.987987988	0.861256545	0.92027972	0.914629135	0.085370865	0.430264993	0.977812995	0.597578692
372	1	0	1	1	1	0.858560794	0.141439206	0.987987988	0.861256545	0.92027972	0.914629135	0.085370865	0.430264993	0.977812995	0.597578692
372	1	0	1	1	1	0.858560794	0.141439206	0.987987988	0.861256545	0.92027972	0.914629135	0.085370865	0.430264993	0.977812995	0.597578692
372	1	0	1	1	1	0.858560794	0.141439206	0.987987988	0.861256545	0.92027972	0.914629135	0.085370865	0.430264993	0.977812995	0.597578692
372	1	0	1	1	1	0.858560794	0.141439206	0.987987988	0.861256545	0.92027972	0.914629135	0.085370865	0.430264993	0.977812995	0.597578692
372	1	0	1	1	1	0.858560794	0.141439206	0.987987988	0.861256545	0.92027972	0.914629135	0.085370865	0.430264993	0.977812995	0.597578692
372	1	0	1	1	1	0.858560794	0.141439206	0.987987988	0.861256545	0.92027972	0.914629135	0.085370865	0.430264993	0.977812995	0.597578692
372	1	0	1	1	1	0.858560794	0.141439206	0.987987988	0.861256545	0.92027972	0.914629135	0.085370865	0.430264993	0.977812995	0.597578692
372	1	0	1	1	1	0.858560794	0.141439206	0.987987988	0.861256545	0.92027972	0.914629135	0.085370865	0.430264993	0.977812995	0.597578692
372	1	0	1	1	1	0.858560794	0.141439206	0.987987988	0.861256545	0.92027972	0.914629135	0.085370865	0.430264993	0.977812995	0.597578692
372	1	0	1	1	1	0.858560794	0.141439206	0.987987988	0.861256545	0.92027972	0.914629135	0.085370865	0.430264993	0.977812995	0.597578692
372	1	0	1	1	1	0.858560794	0.141439206	0.987987988	0.861256545	0.92027972	0.914629135	0.085370865	0.430264993	0.977812995	0.597578692
372	1	0	1	1	1	0.858560794	0.141439206	0.987987988	0.861256545	0.92027972	0.914629135	0.085370865	0.430264993	0.977812995	0.597578692
372	1	0	1	1	1	0.858560794	0.141439206	0.987987988	0.861256545	0.92027972	0.914629135	0.085370865	0.430264993	0.977812995	0.597578692
372	1	0	1	1	1	0.858560794	0.141439206	0.987987988	0.861256545	0.92027972	0.914629135	0.085370865	0.430264993	0.977812995	0.597578692
372	1	0	1	1	1	0.858560794	0.141439206	0.987987988	0.861256545	0.92027972	0.914629135	0.085370865	0.430264993	0.977812995	0.597578692
372	1	0	1	1	1	0.858560794	0.141439206	0.987987988	0.861256545	0.92027972	0.914629135	0.085370865	0.430264993	0.977812995	0.597578692
372	1	0	1	1	1	0.858560794	0.141439206	0.987987988	0.861256545	0.92027972	0.914629135	0.085370865	0.430264993	0.977812995	0.597578692
372	1	0	1	1	1	0.858560794	0.141439206	0.987987988	0.861256545	0.92027972	0.914629135	0.085370865	0.430264993	0.977812995	0.597578692
372	1	0	1	1	1	0.858560794	0.141439206	0.987987988	0.861256545	0.92027972	0.914629135	0.085370865	0.430264993	0.977812995	0.597578692
372	1	0	1	1	1	0.858560794	0.141439206	0.987987988	0.861256545	0.92027972	0.914629135	0.085370865	0.430264993	0.977812995	0.597578692
372	1	0	1	1	1	0.858560794	0.141439206	0.987987988	0.861256545	0.92027972	0.914629135	0.085370865	0.430264993	0.977812995	0.597578692
372	1	0	1	1	1	0.858560794	0.141439206	0.987987988	0.861256545	0.92027972	0.914629135	0.085370865	0.430264993	0.977812995	0.597578692
372	1	0	1	1	1	0.858560794	0.141439206	0.987987988	0.861256545	0.92027972	0.914629135	0.085370865	0.430264993	0.977812995	0.597578692
372	1	0	1	1	1	0.858560794	0.141439206	0.987987988	0.861256545	0.92027972	0.914629135	0.085370865	0.430264993	0.977812995	0.597578692
372	1	0	1	1	1	0.858560794	0.141439206	0.987987988	0.861256545	0.92027972	0.914629135	0.085370865	0.430264993	0.977812995	0.597578692
372	1	0	1	1	1	0.858560794	0.141439206	0.987987988	0.861256545	0.92027972	0.914629135	0.085370865	0.430264993	0.977812995	0.597578692
372	1	0	1	1	1	0.858560794	0.141439206	0.987987988	0.861256545	0.92027972	0.914629135	0.085370865	0.430264993	0.977812995	0.597578692
372	1	0	1	1	1	0.858560794	0.141439206	0.987987988	0.861256545	0.92027972	0.914629135	0.085370865	0.430264993	0.977812995	0.597578692
372	1	0	1	1	1	0.858560794	0.141439206	0.987987988	0.861256545	0.92027972	0.914629135	0.085370865	0.430264993	0.977812995	0.597578692
372	1	0	1	1	1	0.858560794	0.141439206	0.987987988	0.861256545	0.92027972	0.914629135	0.085370865	0.430264993	0.977812995	0.597578692
372	1	0	1	1	1	0.858560794	0.141439206	0.987987988	0.861256545	0.92027972	0.914629135	0.085370865	0.430264993	0.977812995	0.597578692
372	1	0	1	1	1	0.858560794	0.141439206	0.987987988	0.861256545	0.92027972	0.914629135	0.085370865	0.430264993	0.977812995	0.597578692
372	1	0	1	1	1	0.858560794	0.141439206	0.987987988	0.861256545	0.92027972	0.914629135	0.085370865	0.430264993	0.977812995	0.597578692
372	1	0	1	1	1	0.858560794	0.141439206	0.987987988	0.861256545	0.92027972	0.914629135	0.085370865	0.430264993	0.977812995	0.597578692
372	1	0	1	1	1	0.858560794	0.141439206	0.987987988	0.861256545	0.92027972	0.914629135	0.085370865	0.430264993	0.977812995	0.597578692
372	1	0	1	1	1	0.858560794	0.141439206	0.987987988	0.861256545	0.92027972	0.914629135	0.085370865	0.430264993	0.977812995	0.597578692
372	1	0	1	1	1	0.858560794	0.141439206	0.987987988	0.861256545	0.92027972	0.914629135	0.085370865	0.430264993	0.977812995	0.597578692
372	1	0	1	1	1	0.858560794	0.141439206	0.987987988	0.861256545	0.92027972	0.914629135	0.085370865	0.430264993	0.977812995	0.597578692
372	1	0	1	1	1	0.858560794	0.141439206	0.987987988	0.861256545	0.92027972	0.914629135	0.085370865	0.430264993	0.977812995	0.597578692
372	1	0	1	1	1	0.858560794	0.141439206	0.987987988	0.861256545	0.92027972	0.914629135	0.085370865	0.430264993	0.977812995	0.597578692
372	1	0	1	1	1	0.858560794	0.141439206	0.987987988	0.861256545	0.92027972	0.914629135	0.085370865	0.430264993	0.977812995	0.597578692
372	1	0	1	1	1	0.858560794	0.141439206	0.987987988	0.861256545	0.92027972	0.914629135	0.085370865	0.430264993	0.977812995	0.597578692
372	1	0	1	1	1	0.858560794	0.141439206	0.987987988	0.861256545	0.92027972	0.914629135	0.085370865	0.430264993	0.977812995	0.597578692
372	1	0	1	1	1	0.858560794	0.141439206	0.987987988	0.861256545	0.92027972	0.914629135	0.085370865	0.430264993	0.977812995	0.597578692
372	1	0	1	1	1	0.858560794	0.141439206	0.987987988	0.861256545	0.92027972	0.914629135	0.085370865	0.430264993	0.977812995	0.597578692
372	1	0	1	1	1	0.858560794	0.141439206	0.987987988	0.861256545	0.92027972	0.914629135	0.085370865	0.430264993	0.977812995	0.597578692
372	1	0	1	1	1	0.858560794	0.141439206	0.987987988	0.861256545	0.92027972	0.914629135	0.085370865	0.430264993	0.977812995	0.597578692
372	1	0	1	1	1	0.858560794	0.141439206	0.987987988	0.861256545	0.92027972	0.914629135	0.085370865	0.430264993	0.977812995	0.597578692
372	1	0	1	1	1	0.858560794	0.141439206	0.987987988	0.861256545	0.92027972	0.914629135	0.085370865	0.430264993	0.977812995	0.597578692
372	1	0	1	1	1	0.858560794	0.141439206	0.987987988	0.861256545	0.92027972	0.914629135	0.085370865	0.430264993	0.977812995	0.597578692
372	1	0	1	1	1	0.858560794	0.141439206	0.987987988	0.861256545	0.92027972	0.914629135	0.085370865	0.430264993	0.977812995	0.597578692
372	1	0	1	1	1	0.858560794	0.141439206	0.987987988	0.861256545	0.92027972	0.914629135	0.085370865	0.430264993	0.977812995	0.597578692
372	1	0	1	1	1	0.858560794	0.141439206	0.987987988	0.861256545	0.92027972	0.914629135	0.085370865	0.430264993	0.977812995	0.597578692
372	1	0	1	1	1	0.858560794	0.141439206	0.987987988	0.861256545	0.92027972	0.914629135	0.085370865	0.430264993	0.977812995	0.597578692
372	1	0	1	1	1	0.858560794	0.141439206	0.987987988	0.861256545	0.92027972	0.914629135	0.085370865	0.430264993	0.977812995	0.597578692
372	1	0	1	1	1	0.858560794	0.141439206	0.987987988	0.861256545	0.92027972	0.914629135	0.085370865	0.430264993	0.977812995	0.597578692
372	1	0	1	1	1	0.858560794	0.141439206	0.987987988	0.861256545	0.92027972	0.914629135	0.085370865	0.430264993	0.977812995	0.597578692
372	1	0	1	1	1	0.858560794	0.141439206	0.987987988	0.861256545	0.92027972	0.914629135	0.085370865	0.430264993	0.977812995	0.597578692
372	1	0	1	1	1	0.858560794	0.141439206	0.987987988	0.861256545	0.92027972	0.914629135	0.085370865	0.430264993	0.977812995	0.597578692
372	1	0	1	1	1	0.858560794	0.141439206	0.987987988	0.861256545	0.92027972	0.914629135	0.085370865	0.430264993	0.977812995	0.597578692
372	1	0	1	1	1	0.858560794	0.141439206	0.987987988	0.861256545	0.92027972	0.914629135	0.085370865	0.430264993	0.977812995	0.597578692
372	1	0	1	1	1	0.858560794	0.141439206	0.987987988	0.861256545	0.92027972	0.914629135	0.085370865	0.430264993	0.977812995	0.597578692
372	1	0	1	1	1	0.858560794	0.141439206	0.987987988	0.861256545	0.92027972	0.914629135	0.085370865	0.430264993	0.977812995	0.597578692
372	1	0	1	1	1	0.858560794	0.141439206	0.987987988	0.861256545	0.92027972	0.914629135	0.085370865	0.430264993	0.977812995	0.597578692
372	1	0	1	1	1	0.858560794	0.141439206	0.987987988	0.861256545	0.92027972	0.914629135	0.085370865	0.430264993	0.977812995	0.597578692
372	1	0	1	1	1	0.858560794	0.141439206	0.987987988	0.861256545	0.92027972	0.914629135	0.085370865	0.430264993	0.977812995	0.597578692
372	1	0	1	1	1	0.858560794	0.141439206	0.987987988	0.861256545	0.92027972	0.914629135	0.085370865	0.430264993	0.977812995	0.597578692
372	1	0	1	1	1	0.858560794	0.141439206	0.987987988	0.861256545	0.92027972	0.914629135	0.085370865	0.430264993	0.977812995	0.597578692
372	1	0	1	1	1	0.858560794	0.141439206	0.987987988	0.861256545	0.92027972	0.914629135	0.085370865	0.430264993	0.977812995	0.597578692
371	1	0	1	1	1	0.856608479	0.143391521	0.986280488	0.859229748	0.918381831	0.915142798	0.084857202	0.43454039	0.978056426	0.601735776
371	1	0	1	1	1	0.856608479	0.143391521	0.986280488	0.859229748	0.918381831	0.915142798	0.084857202	0.43454039	0.978056426	0.601735776
370	1	0	1	1	1	0.86	0.14	0.98778626	0.861517976	0.920341394	0.915262942	0.084737058	0.435629784	0.978125	0.602792489
370	1	0	1	1	1	0.86	0.14	0.98778626	0.861517976	0.920341394	0.915262942	0.084737058	0.435629784	0.978125	0.602792489
370	1	0	1	1	1	0.86	0.14	0.98778626	0.861517976	0.920341394	0.915262942	0.084737058	0.435629784	0.978125	0.602792489
370	1	0	1	1	1	0.86	0.14	0.98778626	0.861517976	0.920341394	0.915262942	0.084737058	0.435629784	0.978125	0.602792489
370	1	0	1	1	1	0.86	0.14	0.98778626	0.861517976	0.920341394	0.915262942	0.084737058	0.435629784	0.978125	0.602792489
369	1	0	1	1	1	0.86	0.14	0.98778626	0.861517976	0.920341394	0.915365653	0.084634347	0.435933148	0.978125	0.603082852
368	1	0	1	1	1	0.862373737	0.137626263	0.98778626	0.864973262	0.922309337	0.914922003	0.085077997	0.435595568	0.978227061	0.602779109
368	1	0	1	1	1	0.862373737	0.137626263	0.98778626	0.864973262	0.922309337	0.914922003	0.085077997	0.435595568	0.978227061	0.602779109
368	1	0	1	1	1	0.862373737	0.137626263	0.98778626	0.864973262	0.922309337	0.914922003	0.085077997	0.435595568	0.978227061	0.602779109
367	1	0	1	1	1	0.871465296	0.128534704	0.989377845	0.875167785	0.928774929	0.918758324	0.081241676	0.44922426	0.981510015	0.616352201
367	1	0	1	1	1	0.871465296	0.128534704	0.989377845	0.875167785	0.928774929	0.918758324	0.081241676	0.44922426	0.981510015	0.616352201
366	1	0	1	1	1	0.871630295	0.128369705	0.989377845	0.875167785	0.928774929	0.918852459	0.081147541	0.449541284	0.981510015	0.616650532
365	1	0	1	1	1	0.87757732	0.12242268	0.989425982	0.881561238	0.932384342	0.918672539	0.081327461	0.449612403	0.980030722	0.616425121
365	1	0	1	1	1	0.87757732	0.12242268	0.989425982	0.881561238	0.932384342	0.918672539	0.081327461	0.449612403	0.980030722	0.616425121
365	1	0	1	1	1	0.87757732	0.12242268	0.989425982	0.881561238	0.932384342	0.918672539	0.081327461	0.449612403	0.980030722	0.616425121
365	1	0	1	1	1	0.87757732	0.12242268	0.989425982	0.881561238	0.932384342	0.918672539	0.081327461	0.449612403	0.980030722	0.616425121
365	1	0	1	1	1	0.87757732	0.12242268	0.989425982	0.881561238	0.932384342	0.918672539	0.081327461	0.449612403	0.980030722	0.616425121
365	1	0	1	1	1	0.87757732	0.12242268	0.989425982	0.881561238	0.932384342	0.918672539	0.081327461	0.449612403	0.980030722	0.616425121
365	1	0	1	1	1	0.87757732	0.12242268	0.989425982	0.881561238	0.932384342	0.918672539	0.081327461	0.449612403	0.980030722	0.616425121
365	1	0	1	1	1	0.87757732	0.12242268	0.989425982	0.881561238	0.932384342	0.918672539	0.081327461	0.449612403	0.980030722	0.616425121
365	1	0	1	1	1	0.87757732	0.12242268	0.989425982	0.881561238	0.932384342	0.918672539	0.081327461	0.449612403	0.980030722	0.616425121
365	1	0	1	1	1	0.87757732	0.12242268	0.989425982	0.881561238	0.932384342	0.918672539	0.081327461	0.449612403	0.980030722	0.616425121
365	1	0	1	1	1	0.87757732	0.12242268	0.989425982	0.881561238	0.932384342	0.918672539	0.081327461	0.449612403	0.980030722	0.616425121
365	1	0	1	1	1	0.87757732	0.12242268	0.989425982	0.881561238	0.932384342	0.918672539	0.081327461	0.449612403	0.980030722	0.616425121
365	1	0	1	1	1	0.87757732	0.12242268	0.989425982	0.881561238	0.932384342	0.918672539	0.081327461	0.449612403	0.980030722	0.616425121
365	1	0	1	1	1	0.87757732	0.12242268	0.989425982	0.881561238	0.932384342	0.918672539	0.081327461	0.449612403	0.980030722	0.616425121
365	1	0	1	1	1	0.87757732	0.12242268	0.989425982	0.881561238	0.932384342	0.918672539	0.081327461	0.449612403	0.980030722	0.616425121
365	1	0	1	1	1	0.87757732	0.12242268	0.989425982	0.881561238	0.932384342	0.918672539	0.081327461	0.449612403	0.980030722	0.616425121
365	1	0	1	1	1	0.87757732	0.12242268	0.989425982	0.881561238	0.932384342	0.918672539	0.081327461	0.449612403	0.980030722	0.616425121
365	1	0	1	1	1	0.87757732	0.12242268	0.989425982	0.881561238	0.932384342	0.918672539	0.081327461	0.449612403	0.980030722	0.616425121
365	1	0	1	1	1	0.87757732	0.12242268	0.989425982	0.881561238	0.932384342	0.918672539	0.081327461	0.449612403	0.980030722	0.616425121
365	1	0	1	1	1	0.87757732	0.12242268	0.989425982	0.881561238	0.932384342	0.918672539	0.081327461	0.449612403	0.980030722	0.616425121
365	1	0	1	1	1	0.87757732	0.12242268	0.989425982	0.881561238	0.932384342	0.918672539	0.081327461	0.449612403	0.980030722	0.616425121
365	1	0	1	1	1	0.87757732	0.12242268	0.989425982	0.881561238	0.932384342	0.918672539	0.081327461	0.449612403	0.980030722	0.616425121
365	1	0	1	1	1	0.87757732	0.12242268	0.989425982	0.881561238	0.932384342	0.918672539	0.081327461	0.449612403	0.980030722	0.616425121
365	1	0	1	1	1	0.87757732	0.12242268	0.989425982	0.881561238	0.932384342	0.918672539	0.081327461	0.449612403	0.980030722	0.616425121
365	1	0	1	1	1	0.87757732	0.12242268	0.989425982	0.881561238	0.932384342	0.918672539	0.081327461	0.449612403	0.980030722	0.616425121
365	1	0	1	1	1	0.87757732	0.12242268	0.989425982	0.881561238	0.932384342	0.918672539	0.081327461	0.449612403	0.980030722	0.616425121
365	1	0	1	1	1	0.87757732	0.12242268	0.989425982	0.881561238	0.932384342	0.918672539	0.081327461	0.449612403	0.980030722	0.616425121
365	1	0	1	1	1	0.87757732	0.12242268	0.989425982	0.881561238	0.932384342	0.918672539	0.081327461	0.449612403	0.980030722	0.616425121
365	1	0	1	1	1	0.87757732	0.12242268	0.989425982	0.881561238	0.932384342	0.918672539	0.081327461	0.449612403	0.980030722	0.616425121
365	1	0	1	1	1	0.87757732	0.12242268	0.989425982	0.881561238	0.932384342	0.918672539	0.081327461	0.449612403	0.980030722	0.616425121
365	1	0	1	1	1	0.87757732	0.12242268	0.989425982	0.881561238	0.932384342	0.918672539	0.081327461	0.449612403	0.980030722	0.616425121
365	1	0	1	1	1	0.87757732	0.12242268	0.989425982	0.881561238	0.932384342	0.918672539	0.081327461	0.449612403	0.980030722	0.616425121
365	1	0	1	1	1	0.87757732	0.12242268	0.989425982	0.881561238	0.932384342	0.918672539	0.081327461	0.449612403	0.980030722	0.616425121
364	1	0	1	1	1	0.87757732	0.12242268	0.990922844	0.880376344	0.932384342	0.918570112	0.081429888	0.4490513	0.983076923	0.616497829
364	1	0	1	1	1	0.87757732	0.12242268	0.990922844	0.880376344	0.932384342	0.918570112	0.081429888	0.4490513	0.983076923	0.616497829
363	1	0	1	1	1	0.877419355	0.122580645	0.990909091	0.880215343	0.932287954	0.918578451	0.081421549	0.449438202	0.983102919	0.61686747
362	1	0	1	1	1	0.878709677	0.121290323	0.990922844	0.881561238	0.933048433	0.918578451	0.081421549	0.449367089	0.98156682	0.616497829
362	1	0	1	1	1	0.878709677	0.121290323	0.990922844	0.881561238	0.933048433	0.918578451	0.081421549	0.449367089	0.98156682	0.616497829
362	1	0	1	1	1	0.878709677	0.121290323	0.990922844	0.881561238	0.933048433	0.918578451	0.081421549	0.449367089	0.98156682	0.616497829
362	1	0	1	1	1	0.878709677	0.121290323	0.990922844	0.881561238	0.933048433	0.918578451	0.081421549	0.449367089	0.98156682	0.616497829
362	1	0	1	1	1	0.878709677	0.121290323	0.990922844	0.881561238	0.933048433	0.918578451	0.081421549	0.449367089	0.98156682	0.616497829
362	1	0	1	1	1	0.878709677	0.121290323	0.990922844	0.881561238	0.933048433	0.918578451	0.081421549	0.449367089	0.98156682	0.616497829
362	1	0	1	1	1	0.878709677	0.121290323	0.990922844	0.881561238	0.933048433	0.918578451	0.081421549	0.449367089	0.98156682	0.616497829
362	1	0	1	1	1	0.878709677	0.121290323	0.990922844	0.881561238	0.933048433	0.918578451	0.081421549	0.449367089	0.98156682	0.616497829
362	1	0	1	1	1	0.878709677	0.121290323	0.990922844	0.881561238	0.933048433	0.918578451	0.081421549	0.449367089	0.98156682	0.616497829
362	1	0	1	1	1	0.878709677	0.121290323	0.990922844	0.881561238	0.933048433	0.918578451	0.081421549	0.449367089	0.98156682	0.616497829
362	1	0	1	1	1	0.878709677	0.121290323	0.990922844	0.881561238	0.933048433	0.918578451	0.081421549	0.449367089	0.98156682	0.616497829
361	1	0	1	1	1	0.878709677	0.121290323	0.990922844	0.881561238	0.933048433	0.918476034	0.081523966	0.449122807	0.983102919	0.616570328
360	1	0	1	1	1	0.878552972	0.121447028	0.990909091	0.881401617	0.932952924	0.91858679	0.08141321	0.449754041	0.981595092	0.61686747
360	1	0	1	1	1	0.878552972	0.121447028	0.990909091	0.881401617	0.932952924	0.91858679	0.08141321	0.449754041	0.981595092	0.61686747
360	1	0	1	1	1	0.878552972	0.121447028	0.990909091	0.881401617	0.932952924	0.91858679	0.08141321	0.449754041	0.981595092	0.61686747
359	1	0	1	1	1	0.879689521	0.120310479	0.990922844	0.882749326	0.933713471	0.92124936	0.07875064	0.45773639	0.98156682	0.624328285
358	1	0	1	1	1	0.883116883	0.116883117	0.990922844	0.886332882	0.935714286	0.921785422	0.078214578	0.460545194	0.981651376	0.626953125
357	1	0	1	1	1	0.883116883	0.116883117	0.990922844	0.886332882	0.935714286	0.921785422	0.078214578	0.460545194	0.981651376	0.626953125
357	1	0	1	1	1	0.883116883	0.116883117	0.990922844	0.886332882	0.935714286	0.921785422	0.078214578	0.460545194	0.981651376	0.626953125
356	1	0	1	1	1	0.885976409	0.114023591	0.990895296	0.889645777	0.937544867	0.922368825	0.077631175	0.464899713	0.981845688	0.631016043
356	1	0	1	1	1	0.885976409	0.114023591	0.990895296	0.889645777	0.937544867	0.922368825	0.077631175	0.464899713	0.981845688	0.631016043
356	1	0	1	1	1	0.885976409	0.114023591	0.990895296	0.889645777	0.937544867	0.922368825	0.077631175	0.464899713	0.981845688	0.631016043
356	1	0	1	1	1	0.885976409	0.114023591	0.990895296	0.889645777	0.937544867	0.922368825	0.077631175	0.464899713	0.981845688	0.631016043
356	1	0	1	1	1	0.885976409	0.114023591	0.990895296	0.889645777	0.937544867	0.922368825	0.077631175	0.464899713	0.981845688	0.631016043
356	1	0	1	1	1	0.885976409	0.114023591	0.990895296	0.889645777	0.937544867	0.922368825	0.077631175	0.464899713	0.981845688	0.631016043
356	1	0	1	1	1	0.885976409	0.114023591	0.990895296	0.889645777	0.937544867	0.922368825	0.077631175	0.464899713	0.981845688	0.631016043
356	1	0	1	1	1	0.885976409	0.114023591	0.990895296	0.889645777	0.937544867	0.922368825	0.077631175	0.464899713	0.981845688	0.631016043
356	1	0	1	1	1	0.885976409	0.114023591	0.990895296	0.889645777	0.937544867	0.922368825	0.077631175	0.464899713	0.981845688	0.631016043
356	1	0	1	1	1	0.885976409	0.114023591	0.990895296	0.889645777	0.937544867	0.922368825	0.077631175	0.464899713	0.981845688	0.631016043
356	1	0	1	1	1	0.885976409	0.114023591	0.990895296	0.889645777	0.937544867	0.922368825	0.077631175	0.464899713	0.981845688	0.631016043
356	1	0	1	1	1	0.885976409	0.114023591	0.990895296	0.889645777	0.937544867	0.922368825	0.077631175	0.464899713	0.981845688	0.631016043
356	1	0	1	1	1	0.885976409	0.114023591	0.990895296	0.889645777	0.937544867	0.922368825	0.077631175	0.464899713	0.981845688	0.631016043
356	1	0	1	1	1	0.885976409	0.114023591	0.990895296	0.889645777	0.937544867	0.922368825	0.077631175	0.464899713	0.981845688	0.631016043
356	1	0	1	1	1	0.885976409	0.114023591	0.990895296	0.889645777	0.937544867	0.922368825	0.077631175	0.464899713	0.981845688	0.631016043
356	1	0	1	1	1	0.885976409	0.114023591	0.990895296	0.889645777	0.937544867	0.922368825	0.077631175	0.464899713	0.981845688	0.631016043
356	1	0	1	1	1	0.885976409	0.114023591	0.990895296	0.889645777	0.937544867	0.922368825	0.077631175	0.464899713	0.981845688	0.631016043
356	1	0	1	1	1	0.885976409	0.114023591	0.990895296	0.889645777	0.937544867	0.922368825	0.077631175	0.464899713	0.981845688	0.631016043
356	1	0	1	1	1	0.885976409	0.114023591	0.990895296	0.889645777	0.937544867	0.922368825	0.077631175	0.464899713	0.981845688	0.631016043
356	1	0	1	1	1	0.885976409	0.114023591	0.990895296	0.889645777	0.937544867	0.922368825	0.077631175	0.464899713	0.981845688	0.631016043
356	1	0	1	1	1	0.885976409	0.114023591	0.990895296	0.889645777	0.937544867	0.922368825	0.077631175	0.464899713	0.981845688	0.631016043
356	1	0	1	1	1	0.885976409	0.114023591	0.990895296	0.889645777	0.937544867	0.922368825	0.077631175	0.464899713	0.981845688	0.631016043
356	1	0	1	1	1	0.885976409	0.114023591	0.990895296	0.889645777	0.937544867	0.922368825	0.077631175	0.464899713	0.981845688	0.631016043
356	1	0	1	1	1	0.885976409	0.114023591	0.990895296	0.889645777	0.937544867	0.922368825	0.077631175	0.464899713	0.981845688	0.631016043
356	1	0	1	1	1	0.885976409	0.114023591	0.990895296	0.889645777	0.937544867	0.922368825	0.077631175	0.464899713	0.981845688	0.631016043
356	1	0	1	1	1	0.885976409	0.114023591	0.990895296	0.889645777	0.937544867	0.922368825	0.077631175	0.464899713	0.981845688	0.631016043
356	1	0	1	1	1	0.885976409	0.114023591	0.990895296	0.889645777	0.937544867	0.922368825	0.077631175	0.464899713	0.981845688	0.631016043
356	1	0	1	1	1	0.885976409	0.114023591	0.990895296	0.889645777	0.937544867	0.922368825	0.077631175	0.464899713	0.981845688	0.631016043
356	1	0	1	1	1	0.885976409	0.114023591	0.990895296	0.889645777	0.937544867	0.922368825	0.077631175	0.464899713	0.981845688	0.631016043
356	1	0	1	1	1	0.885976409	0.114023591	0.990895296	0.889645777	0.937544867	0.922368825	0.077631175	0.464899713	0.981845688	0.631016043
356	1	0	1	1	1	0.885976409	0.114023591	0.990895296	0.889645777	0.937544867	0.922368825	0.077631175	0.464899713	0.981845688	0.631016043
356	1	0	1	1	1	0.885976409	0.114023591	0.990895296	0.889645777	0.937544867	0.922368825	0.077631175	0.464899713	0.981845688	0.631016043
356	1	0	1	1	1	0.885976409	0.114023591	0.990895296	0.889645777	0.937544867	0.922368825	0.077631175	0.464899713	0.981845688	0.631016043
356	1	0	1	1	1	0.885976409	0.114023591	0.990895296	0.889645777	0.937544867	0.922368825	0.077631175	0.464899713	0.981845688	0.631016043
356	1	0	1	1	1	0.885976409	0.114023591	0.990895296	0.889645777	0.937544867	0.922368825	0.077631175	0.464899713	0.981845688	0.631016043
356	1	0	1	1	1	0.885976409	0.114023591	0.990895296	0.889645777	0.937544867	0.922368825	0.077631175	0.464899713	0.981845688	0.631016043
356	1	0	1	1	1	0.885976409	0.114023591	0.990895296	0.889645777	0.937544867	0.922368825	0.077631175	0.464899713	0.981845688	0.631016043
356	1	0	1	1	1	0.885976409	0.114023591	0.990895296	0.889645777	0.937544867	0.922368825	0.077631175	0.464899713	0.981845688	0.631016043
356	1	0	1	1	1	0.885976409	0.114023591	0.990895296	0.889645777	0.937544867	0.922368825	0.077631175	0.464899713	0.981845688	0.631016043
356	1	0	1	1	1	0.885976409	0.114023591	0.990895296	0.889645777	0.937544867	0.922368825	0.077631175	0.464899713	0.981845688	0.631016043
356	1	0	1	1	1	0.885976409	0.114023591	0.990895296	0.889645777	0.937544867	0.922368825	0.077631175	0.464899713	0.981845688	0.631016043
356	1	0	1	1	1	0.885976409	0.114023591	0.990895296	0.889645777	0.937544867	0.922368825	0.077631175	0.464899713	0.981845688	0.631016043
356	1	0	1	1	1	0.885976409	0.114023591	0.990895296	0.889645777	0.937544867	0.922368825	0.077631175	0.464899713	0.981845688	0.631016043
356	1	0	1	1	1	0.885976409	0.114023591	0.990895296	0.889645777	0.937544867	0.922368825	0.077631175	0.464899713	0.981845688	0.631016043
356	1	0	1	1	1	0.885976409	0.114023591	0.990895296	0.889645777	0.937544867	0.922368825	0.077631175	0.464899713	0.981845688	0.631016043
356	1	0	1	1	1	0.885976409	0.114023591	0.990895296	0.889645777	0.937544867	0.922368825	0.077631175	0.464899713	0.981845688	0.631016043
356	1	0	1	1	1	0.885976409	0.114023591	0.990895296	0.889645777	0.937544867	0.922368825	0.077631175	0.464899713	0.981845688	0.631016043
356	1	0	1	1	1	0.885976409	0.114023591	0.990895296	0.889645777	0.937544867	0.922368825	0.077631175	0.464899713	0.981845688	0.631016043
356	1	0	1	1	1	0.885976409	0.114023591	0.990895296	0.889645777	0.937544867	0.922368825	0.077631175	0.464899713	0.981845688	0.631016043
356	1	0	1	1	1	0.885976409	0.114023591	0.990895296	0.889645777	0.937544867	0.922368825	0.077631175	0.464899713	0.981845688	0.631016043
356	1	0	1	1	1	0.885976409	0.114023591	0.990895296	0.889645777	0.937544867	0.922368825	0.077631175	0.464899713	0.981845688	0.631016043
356	1	0	1	1	1	0.885976409	0.114023591	0.990895296	0.889645777	0.937544867	0.922368825	0.077631175	0.464899713	0.981845688	0.631016043
356	1	0	1	1	1	0.885976409	0.114023591	0.990895296	0.889645777	0.937544867	0.922368825	0.077631175	0.464899713	0.981845688	0.631016043
356	1	0	1	1	1	0.885976409	0.114023591	0.990895296	0.889645777	0.937544867	0.922368825	0.077631175	0.464899713	0.981845688	0.631016043
356	1	0	1	1	1	0.885976409	0.114023591	0.990895296	0.889645777	0.937544867	0.922368825	0.077631175	0.464899713	0.981845688	0.631016043
356	1	0	1	1	1	0.885976409	0.114023591	0.990895296	0.889645777	0.937544867	0.922368825	0.077631175	0.464899713	0.981845688	0.631016043
356	1	0	1	1	1	0.885976409	0.114023591	0.990895296	0.889645777	0.937544867	0.922368825	0.077631175	0.464899713	0.981845688	0.631016043
356	1	0	1	1	1	0.885976409	0.114023591	0.990895296	0.889645777	0.937544867	0.922368825	0.077631175	0.464899713	0.981845688	0.631016043
356	1	0	1	1	1	0.885976409	0.114023591	0.990895296	0.889645777	0.937544867	0.922368825	0.077631175	0.464899713	0.981845688	0.631016043
356	1	0	1	1	1	0.885976409	0.114023591	0.990895296	0.889645777	0.937544867	0.922368825	0.077631175	0.464899713	0.981845688	0.631016043
356	1	0	1	1	1	0.885976409	0.114023591	0.990895296	0.889645777	0.937544867	0.922368825	0.077631175	0.464899713	0.981845688	0.631016043
356	1	0	1	1	1	0.885976409	0.114023591	0.990895296	0.889645777	0.937544867	0.922368825	0.077631175	0.464899713	0.981845688	0.631016043
356	1	0	1	1	1	0.885976409	0.114023591	0.990895296	0.889645777	0.937544867	0.922368825	0.077631175	0.464899713	0.981845688	0.631016043
356	1	0	1	1	1	0.885976409	0.114023591	0.990895296	0.889645777	0.937544867	0.922368825	0.077631175	0.464899713	0.981845688	0.631016043
356	1	0	1	1	1	0.885976409	0.114023591	0.990895296	0.889645777	0.937544867	0.922368825	0.077631175	0.464899713	0.981845688	0.631016043
356	1	0	1	1	1	0.885976409	0.114023591	0.990895296	0.889645777	0.937544867	0.922368825	0.077631175	0.464899713	0.981845688	0.631016043
356	1	0	1	1	1	0.885976409	0.114023591	0.990895296	0.889645777	0.937544867	0.922368825	0.077631175	0.464899713	0.981845688	0.631016043
356	1	0	1	1	1	0.885976409	0.114023591	0.990895296	0.889645777	0.937544867	0.922368825	0.077631175	0.464899713	0.981845688	0.631016043
356	1	0	1	1	1	0.885976409	0.114023591	0.990895296	0.889645777	0.937544867	0.922368825	0.077631175	0.464899713	0.981845688	0.631016043
356	1	0	1	1	1	0.885976409	0.114023591	0.990895296	0.889645777	0.937544867	0.922368825	0.077631175	0.464899713	0.981845688	0.631016043
356	1	0	1	1	1	0.885976409	0.114023591	0.990895296	0.889645777	0.937544867	0.922368825	0.077631175	0.464899713	0.981845688	0.631016043
356	1	0	1	1	1	0.885976409	0.114023591	0.990895296	0.889645777	0.937544867	0.922368825	0.077631175	0.464899713	0.981845688	0.631016043
356	1	0	1	1	1	0.885976409	0.114023591	0.990895296	0.889645777	0.937544867	0.922368825	0.077631175	0.464899713	0.981845688	0.631016043
356	1	0	1	1	1	0.885976409	0.114023591	0.990895296	0.889645777	0.937544867	0.922368825	0.077631175	0.464899713	0.981845688	0.631016043
356	1	0	1	1	1	0.885976409	0.114023591	0.990895296	0.889645777	0.937544867	0.922368825	0.077631175	0.464899713	0.981845688	0.631016043
356	1	0	1	1	1	0.885976409	0.114023591	0.990895296	0.889645777	0.937544867	0.922368825	0.077631175	0.464899713	0.981845688	0.631016043
356	1	0	1	1	1	0.885976409	0.114023591	0.990895296	0.889645777	0.937544867	0.922368825	0.077631175	0.464899713	0.981845688	0.631016043
356	1	0	1	1	1	0.885976409	0.114023591	0.990895296	0.889645777	0.937544867	0.922368825	0.077631175	0.464899713	0.981845688	0.631016043
356	1	0	1	1	1	0.885976409	0.114023591	0.990895296	0.889645777	0.937544867	0.922368825	0.077631175	0.464899713	0.981845688	0.631016043
356	1	0	1	1	1	0.885976409	0.114023591	0.990895296	0.889645777	0.937544867	0.922368825	0.077631175	0.464899713	0.981845688	0.631016043
356	1	0	1	1	1	0.885976409	0.114023591	0.990895296	0.889645777	0.937544867	0.922368825	0.077631175	0.464899713	0.981845688	0.631016043
356	1	0	1	1	1	0.885976409	0.114023591	0.990895296	0.889645777	0.937544867	0.922368825	0.077631175	0.464899713	0.981845688	0.631016043
356	1	0	1	1	1	0.885976409	0.114023591	0.990895296	0.889645777	0.937544867	0.922368825	0.077631175	0.464899713	0.981845688	0.631016043
356	1	0	1	1	1	0.885976409	0.114023591	0.990895296	0.889645777	0.937544867	0.922368825	0.077631175	0.464899713	0.981845688	0.631016043
356	1	0	1	1	1	0.885976409	0.114023591	0.990895296	0.889645777	0.937544867	0.922368825	0.077631175	0.464899713	0.981845688	0.631016043
356	1	0	1	1	1	0.885976409	0.114023591	0.990895296	0.889645777	0.937544867	0.922368825	0.077631175	0.464899713	0.981845688	0.631016043
356	1	0	1	1	1	0.885976409	0.114023591	0.990895296	0.889645777	0.937544867	0.922368825	0.077631175	0.464899713	0.981845688	0.631016043
