# Supplementary material for: An Improved Hybrid Feature Selection Algorithm for Electric Charge Recovery Risk
Source: Hindawi journal article supplement (doi:10.1155/2020/8479341), 2020-08-28
Supplement: f1 [file 8479341.f1.zip › 8479341.f1/Experimental Results/201806/BWOA_results.csv]

features_num	Accuracy_high	Loss_high	Precission_high	Recall_high	F1_high	Accuracy_med	Loss_med	Precission_med	Recall_med	F1_med	Accuracy_low	Loss_low	Precission_low	Recall_low	F1_low
320	1	0	1	1	1	0.725728155	0.274271845	0.8983606559999999	0.7696629209999999	0.8290468990000001	0.897628458	0.102371542	0.49816041200000005	0.656644035	0.566527197
320	1	0	1	1	1	0.725728155	0.274271845	0.8983606559999999	0.7696629209999999	0.8290468990000001	0.897628458	0.102371542	0.49816041200000005	0.656644035	0.566527197
320	1	0	1	1	1	0.725728155	0.274271845	0.8983606559999999	0.7696629209999999	0.8290468990000001	0.897628458	0.102371542	0.49816041200000005	0.656644035	0.566527197
320	1	0	1	1	1	0.725728155	0.274271845	0.8983606559999999	0.7696629209999999	0.8290468990000001	0.897628458	0.102371542	0.49816041200000005	0.656644035	0.566527197
320	1	0	1	1	1	0.725728155	0.274271845	0.8983606559999999	0.7696629209999999	0.8290468990000001	0.897628458	0.102371542	0.49816041200000005	0.656644035	0.566527197
320	1	0	1	1	1	0.725728155	0.274271845	0.8983606559999999	0.7696629209999999	0.8290468990000001	0.897628458	0.102371542	0.49816041200000005	0.656644035	0.566527197
320	1	0	1	1	1	0.725728155	0.274271845	0.8983606559999999	0.7696629209999999	0.8290468990000001	0.897628458	0.102371542	0.49816041200000005	0.656644035	0.566527197
320	1	0	1	1	1	0.725728155	0.274271845	0.8983606559999999	0.7696629209999999	0.8290468990000001	0.897628458	0.102371542	0.49816041200000005	0.656644035	0.566527197
320	1	0	1	1	1	0.725728155	0.274271845	0.8983606559999999	0.7696629209999999	0.8290468990000001	0.897628458	0.102371542	0.49816041200000005	0.656644035	0.566527197
320	1	0	1	1	1	0.725728155	0.274271845	0.8983606559999999	0.7696629209999999	0.8290468990000001	0.897628458	0.102371542	0.49816041200000005	0.656644035	0.566527197
267	1	0	1	1	1	0.8193641620000001	0.18063583800000002	0.998204668	0.817647059	0.89894907	0.919171405	0.080828595	0.46772908399999996	0.820979021	0.595939086
267	1	0	1	1	1	0.8193641620000001	0.18063583800000002	0.998204668	0.817647059	0.89894907	0.919171405	0.080828595	0.46772908399999996	0.820979021	0.595939086
267	1	0	1	1	1	0.8193641620000001	0.18063583800000002	0.998204668	0.817647059	0.89894907	0.919171405	0.080828595	0.46772908399999996	0.820979021	0.595939086
267	1	0	1	1	1	0.8193641620000001	0.18063583800000002	0.998204668	0.817647059	0.89894907	0.919171405	0.080828595	0.46772908399999996	0.820979021	0.595939086
267	1	0	1	1	1	0.8193641620000001	0.18063583800000002	0.998204668	0.817647059	0.89894907	0.919171405	0.080828595	0.46772908399999996	0.820979021	0.595939086
267	1	0	1	1	1	0.8193641620000001	0.18063583800000002	0.998204668	0.817647059	0.89894907	0.919171405	0.080828595	0.46772908399999996	0.820979021	0.595939086
258	1	0	1	1	1	0.851485149	0.148514851	0.9778597790000001	0.850722311	0.909871245	0.913963185	0.086036815	0.47179878	0.8018134720000001	0.594049904
266	1	0	1	1	1	0.82137834	0.17862166	0.9879725090000001	0.827338129	0.90054816	0.93009768	0.06990232	0.504878049	0.888412017	0.643856921
266	1	0	1	1	1	0.82137834	0.17862166	0.9879725090000001	0.827338129	0.90054816	0.93009768	0.06990232	0.504878049	0.888412017	0.643856921
266	1	0	1	1	1	0.82137834	0.17862166	0.9879725090000001	0.827338129	0.90054816	0.93009768	0.06990232	0.504878049	0.888412017	0.643856921
266	1	0	1	1	1	0.82137834	0.17862166	0.9879725090000001	0.827338129	0.90054816	0.93009768	0.06990232	0.504878049	0.888412017	0.643856921
266	1	0	1	1	1	0.82137834	0.17862166	0.9879725090000001	0.827338129	0.90054816	0.93009768	0.06990232	0.504878049	0.888412017	0.643856921
266	1	0	1	1	1	0.82137834	0.17862166	0.9879725090000001	0.827338129	0.90054816	0.93009768	0.06990232	0.504878049	0.888412017	0.643856921
266	1	0	1	1	1	0.82137834	0.17862166	0.9879725090000001	0.827338129	0.90054816	0.93009768	0.06990232	0.504878049	0.888412017	0.643856921
266	1	0	1	1	1	0.82137834	0.17862166	0.9879725090000001	0.827338129	0.90054816	0.93009768	0.06990232	0.504878049	0.888412017	0.643856921
266	1	0	1	1	1	0.82137834	0.17862166	0.9879725090000001	0.827338129	0.90054816	0.93009768	0.06990232	0.504878049	0.888412017	0.643856921
266	1	0	1	1	1	0.82137834	0.17862166	0.9879725090000001	0.827338129	0.90054816	0.93009768	0.06990232	0.504878049	0.888412017	0.643856921
266	1	0	1	1	1	0.82137834	0.17862166	0.9879725090000001	0.827338129	0.90054816	0.93009768	0.06990232	0.504878049	0.888412017	0.643856921
266	1	0	1	1	1	0.82137834	0.17862166	0.9879725090000001	0.827338129	0.90054816	0.93009768	0.06990232	0.504878049	0.888412017	0.643856921
266	1	0	1	1	1	0.82137834	0.17862166	0.9879725090000001	0.827338129	0.90054816	0.93009768	0.06990232	0.504878049	0.888412017	0.643856921
266	1	0	1	1	1	0.82137834	0.17862166	0.9879725090000001	0.827338129	0.90054816	0.93009768	0.06990232	0.504878049	0.888412017	0.643856921
266	1	0	1	1	1	0.82137834	0.17862166	0.9879725090000001	0.827338129	0.90054816	0.93009768	0.06990232	0.504878049	0.888412017	0.643856921
266	1	0	1	1	1	0.82137834	0.17862166	0.9879725090000001	0.827338129	0.90054816	0.93009768	0.06990232	0.504878049	0.888412017	0.643856921
266	1	0	1	1	1	0.82137834	0.17862166	0.9879725090000001	0.827338129	0.90054816	0.93009768	0.06990232	0.504878049	0.888412017	0.643856921
266	1	0	1	1	1	0.82137834	0.17862166	0.9879725090000001	0.827338129	0.90054816	0.93009768	0.06990232	0.504878049	0.888412017	0.643856921
266	1	0	1	1	1	0.82137834	0.17862166	0.9879725090000001	0.827338129	0.90054816	0.93009768	0.06990232	0.504878049	0.888412017	0.643856921
266	1	0	1	1	1	0.82137834	0.17862166	0.9879725090000001	0.827338129	0.90054816	0.93009768	0.06990232	0.504878049	0.888412017	0.643856921
266	1	0	1	1	1	0.82137834	0.17862166	0.9879725090000001	0.827338129	0.90054816	0.93009768	0.06990232	0.504878049	0.888412017	0.643856921
266	1	0	1	1	1	0.82137834	0.17862166	0.9879725090000001	0.827338129	0.90054816	0.93009768	0.06990232	0.504878049	0.888412017	0.643856921
266	1	0	1	1	1	0.82137834	0.17862166	0.9879725090000001	0.827338129	0.90054816	0.93009768	0.06990232	0.504878049	0.888412017	0.643856921
266	1	0	1	1	1	0.82137834	0.17862166	0.9879725090000001	0.827338129	0.90054816	0.93009768	0.06990232	0.504878049	0.888412017	0.643856921
266	1	0	1	1	1	0.82137834	0.17862166	0.9879725090000001	0.827338129	0.90054816	0.93009768	0.06990232	0.504878049	0.888412017	0.643856921
266	1	0	1	1	1	0.82137834	0.17862166	0.9879725090000001	0.827338129	0.90054816	0.93009768	0.06990232	0.504878049	0.888412017	0.643856921
266	1	0	1	1	1	0.82137834	0.17862166	0.9879725090000001	0.827338129	0.90054816	0.93009768	0.06990232	0.504878049	0.888412017	0.643856921
266	1	0	1	1	1	0.82137834	0.17862166	0.9879725090000001	0.827338129	0.90054816	0.93009768	0.06990232	0.504878049	0.888412017	0.643856921
266	1	0	1	1	1	0.82137834	0.17862166	0.9879725090000001	0.827338129	0.90054816	0.93009768	0.06990232	0.504878049	0.888412017	0.643856921
266	1	0	1	1	1	0.82137834	0.17862166	0.9879725090000001	0.827338129	0.90054816	0.93009768	0.06990232	0.504878049	0.888412017	0.643856921
266	1	0	1	1	1	0.82137834	0.17862166	0.9879725090000001	0.827338129	0.90054816	0.93009768	0.06990232	0.504878049	0.888412017	0.643856921
266	1	0	1	1	1	0.82137834	0.17862166	0.9879725090000001	0.827338129	0.90054816	0.93009768	0.06990232	0.504878049	0.888412017	0.643856921
266	1	0	1	1	1	0.82137834	0.17862166	0.9879725090000001	0.827338129	0.90054816	0.93009768	0.06990232	0.504878049	0.888412017	0.643856921
266	1	0	1	1	1	0.82137834	0.17862166	0.9879725090000001	0.827338129	0.90054816	0.93009768	0.06990232	0.504878049	0.888412017	0.643856921
266	1	0	1	1	1	0.82137834	0.17862166	0.9879725090000001	0.827338129	0.90054816	0.93009768	0.06990232	0.504878049	0.888412017	0.643856921
266	1	0	1	1	1	0.82137834	0.17862166	0.9879725090000001	0.827338129	0.90054816	0.93009768	0.06990232	0.504878049	0.888412017	0.643856921
266	1	0	1	1	1	0.82137834	0.17862166	0.9879725090000001	0.827338129	0.90054816	0.93009768	0.06990232	0.504878049	0.888412017	0.643856921
266	1	0	1	1	1	0.82137834	0.17862166	0.9879725090000001	0.827338129	0.90054816	0.93009768	0.06990232	0.504878049	0.888412017	0.643856921
266	1	0	1	1	1	0.82137834	0.17862166	0.9879725090000001	0.827338129	0.90054816	0.93009768	0.06990232	0.504878049	0.888412017	0.643856921
266	1	0	1	1	1	0.82137834	0.17862166	0.9879725090000001	0.827338129	0.90054816	0.93009768	0.06990232	0.504878049	0.888412017	0.643856921
266	1	0	1	1	1	0.82137834	0.17862166	0.9879725090000001	0.827338129	0.90054816	0.93009768	0.06990232	0.504878049	0.888412017	0.643856921
266	1	0	1	1	1	0.82137834	0.17862166	0.9879725090000001	0.827338129	0.90054816	0.93009768	0.06990232	0.504878049	0.888412017	0.643856921
266	1	0	1	1	1	0.82137834	0.17862166	0.9879725090000001	0.827338129	0.90054816	0.93009768	0.06990232	0.504878049	0.888412017	0.643856921
266	1	0	1	1	1	0.82137834	0.17862166	0.9879725090000001	0.827338129	0.90054816	0.93009768	0.06990232	0.504878049	0.888412017	0.643856921
266	1	0	1	1	1	0.82137834	0.17862166	0.9879725090000001	0.827338129	0.90054816	0.93009768	0.06990232	0.504878049	0.888412017	0.643856921
266	1	0	1	1	1	0.82137834	0.17862166	0.9879725090000001	0.827338129	0.90054816	0.93009768	0.06990232	0.504878049	0.888412017	0.643856921
266	1	0	1	1	1	0.82137834	0.17862166	0.9879725090000001	0.827338129	0.90054816	0.93009768	0.06990232	0.504878049	0.888412017	0.643856921
266	1	0	1	1	1	0.82137834	0.17862166	0.9879725090000001	0.827338129	0.90054816	0.93009768	0.06990232	0.504878049	0.888412017	0.643856921
266	1	0	1	1	1	0.82137834	0.17862166	0.9879725090000001	0.827338129	0.90054816	0.93009768	0.06990232	0.504878049	0.888412017	0.643856921
266	1	0	1	1	1	0.82137834	0.17862166	0.9879725090000001	0.827338129	0.90054816	0.93009768	0.06990232	0.504878049	0.888412017	0.643856921
266	1	0	1	1	1	0.82137834	0.17862166	0.9879725090000001	0.827338129	0.90054816	0.93009768	0.06990232	0.504878049	0.888412017	0.643856921
266	1	0	1	1	1	0.82137834	0.17862166	0.9879725090000001	0.827338129	0.90054816	0.93009768	0.06990232	0.504878049	0.888412017	0.643856921
266	1	0	1	1	1	0.82137834	0.17862166	0.9879725090000001	0.827338129	0.90054816	0.93009768	0.06990232	0.504878049	0.888412017	0.643856921
266	1	0	1	1	1	0.82137834	0.17862166	0.9879725090000001	0.827338129	0.90054816	0.93009768	0.06990232	0.504878049	0.888412017	0.643856921
266	1	0	1	1	1	0.82137834	0.17862166	0.9879725090000001	0.827338129	0.90054816	0.93009768	0.06990232	0.504878049	0.888412017	0.643856921
266	1	0	1	1	1	0.82137834	0.17862166	0.9879725090000001	0.827338129	0.90054816	0.93009768	0.06990232	0.504878049	0.888412017	0.643856921
266	1	0	1	1	1	0.82137834	0.17862166	0.9879725090000001	0.827338129	0.90054816	0.93009768	0.06990232	0.504878049	0.888412017	0.643856921
266	1	0	1	1	1	0.82137834	0.17862166	0.9879725090000001	0.827338129	0.90054816	0.93009768	0.06990232	0.504878049	0.888412017	0.643856921
266	1	0	1	1	1	0.82137834	0.17862166	0.9879725090000001	0.827338129	0.90054816	0.93009768	0.06990232	0.504878049	0.888412017	0.643856921
266	1	0	1	1	1	0.82137834	0.17862166	0.9879725090000001	0.827338129	0.90054816	0.93009768	0.06990232	0.504878049	0.888412017	0.643856921
266	1	0	1	1	1	0.82137834	0.17862166	0.9879725090000001	0.827338129	0.90054816	0.93009768	0.06990232	0.504878049	0.888412017	0.643856921
266	1	0	1	1	1	0.82137834	0.17862166	0.9879725090000001	0.827338129	0.90054816	0.93009768	0.06990232	0.504878049	0.888412017	0.643856921
266	1	0	1	1	1	0.82137834	0.17862166	0.9879725090000001	0.827338129	0.90054816	0.93009768	0.06990232	0.504878049	0.888412017	0.643856921
266	1	0	1	1	1	0.82137834	0.17862166	0.9879725090000001	0.827338129	0.90054816	0.93009768	0.06990232	0.504878049	0.888412017	0.643856921
266	1	0	1	1	1	0.82137834	0.17862166	0.9879725090000001	0.827338129	0.90054816	0.93009768	0.06990232	0.504878049	0.888412017	0.643856921
266	1	0	1	1	1	0.82137834	0.17862166	0.9879725090000001	0.827338129	0.90054816	0.93009768	0.06990232	0.504878049	0.888412017	0.643856921
266	1	0	1	1	1	0.82137834	0.17862166	0.9879725090000001	0.827338129	0.90054816	0.93009768	0.06990232	0.504878049	0.888412017	0.643856921
266	1	0	1	1	1	0.82137834	0.17862166	0.9879725090000001	0.827338129	0.90054816	0.93009768	0.06990232	0.504878049	0.888412017	0.643856921
266	1	0	1	1	1	0.82137834	0.17862166	0.9879725090000001	0.827338129	0.90054816	0.93009768	0.06990232	0.504878049	0.888412017	0.643856921
266	1	0	1	1	1	0.82137834	0.17862166	0.9879725090000001	0.827338129	0.90054816	0.93009768	0.06990232	0.504878049	0.888412017	0.643856921
266	1	0	1	1	1	0.82137834	0.17862166	0.9879725090000001	0.827338129	0.90054816	0.93009768	0.06990232	0.504878049	0.888412017	0.643856921
266	1	0	1	1	1	0.82137834	0.17862166	0.9879725090000001	0.827338129	0.90054816	0.93009768	0.06990232	0.504878049	0.888412017	0.643856921
266	1	0	1	1	1	0.82137834	0.17862166	0.9879725090000001	0.827338129	0.90054816	0.93009768	0.06990232	0.504878049	0.888412017	0.643856921
266	1	0	1	1	1	0.82137834	0.17862166	0.9879725090000001	0.827338129	0.90054816	0.93009768	0.06990232	0.504878049	0.888412017	0.643856921
266	1	0	1	1	1	0.82137834	0.17862166	0.9879725090000001	0.827338129	0.90054816	0.93009768	0.06990232	0.504878049	0.888412017	0.643856921
266	1	0	1	1	1	0.82137834	0.17862166	0.9879725090000001	0.827338129	0.90054816	0.93009768	0.06990232	0.504878049	0.888412017	0.643856921
266	1	0	1	1	1	0.82137834	0.17862166	0.9879725090000001	0.827338129	0.90054816	0.93009768	0.06990232	0.504878049	0.888412017	0.643856921
266	1	0	1	1	1	0.82137834	0.17862166	0.9879725090000001	0.827338129	0.90054816	0.93009768	0.06990232	0.504878049	0.888412017	0.643856921
266	1	0	1	1	1	0.82137834	0.17862166	0.9879725090000001	0.827338129	0.90054816	0.93009768	0.06990232	0.504878049	0.888412017	0.643856921
252	1	0	1	1	1	0.859223301	0.140776699	0.9962121209999999	0.8608837970000001	0.923617208	0.928139488	0.071860512	0.52585579	0.9209183670000001	0.669448308
252	1	0	1	1	1	0.859223301	0.140776699	0.9962121209999999	0.8608837970000001	0.923617208	0.928139488	0.071860512	0.52585579	0.9209183670000001	0.669448308
252	1	0	1	1	1	0.859223301	0.140776699	0.9962121209999999	0.8608837970000001	0.923617208	0.928139488	0.071860512	0.52585579	0.9209183670000001	0.669448308
252	1	0	1	1	1	0.859223301	0.140776699	0.9962121209999999	0.8608837970000001	0.923617208	0.928139488	0.071860512	0.52585579	0.9209183670000001	0.669448308
