# Supplementary material for: An Improved Hybrid Feature Selection Algorithm for Electric Charge Recovery Risk
Source: Hindawi journal article supplement (doi:10.1155/2020/8479341), 2020-08-28
Supplement: f1 [file 8479341.f1.zip › 8479341.f1/Experimental Results/201806/BWOA_SBS_results.csv]

features_num	Accuracy_high	Loss_high	Precission_high	Recall_high	F1_high	Accuracy_med	Loss_med	Precission_med	Recall_med	F1_med	Accuracy_low	Loss_low	Precission_low	Recall_low	F1_low
252	1	0	1	1	1	0.857605178	0.142394822	0.996204934	0.859247136	0.922671353	0.928441846	0.071558154	0.527007299	0.920918367	0.670380687
252	1	0	1	1	1	0.857605178	0.142394822	0.996204934	0.859247136	0.922671353	0.928441846	0.071558154	0.527007299	0.920918367	0.670380687
252	1	0	1	1	1	0.857605178	0.142394822	0.996204934	0.859247136	0.922671353	0.928441846	0.071558154	0.527007299	0.920918367	0.670380687
251	1	0	1	1	1	0.857621441	0.142378559	0.998039216	0.858347386	0.922937443	0.930001006	0.069998994	0.539317507	0.906483791	0.67627907
251	1	0	1	1	1	0.857621441	0.142378559	0.998039216	0.858347386	0.922937443	0.930001006	0.069998994	0.539317507	0.906483791	0.67627907
251	1	0	1	1	1	0.857621441	0.142378559	0.998039216	0.858347386	0.922937443	0.930001006	0.069998994	0.539317507	0.906483791	0.67627907
251	1	0	1	1	1	0.857621441	0.142378559	0.998039216	0.858347386	0.922937443	0.930001006	0.069998994	0.539317507	0.906483791	0.67627907
251	1	0	1	1	1	0.857621441	0.142378559	0.998039216	0.858347386	0.922937443	0.930001006	0.069998994	0.539317507	0.906483791	0.67627907
251	1	0	1	1	1	0.857621441	0.142378559	0.998039216	0.858347386	0.922937443	0.930001006	0.069998994	0.539317507	0.906483791	0.67627907
251	1	0	1	1	1	0.857621441	0.142378559	0.998039216	0.858347386	0.922937443	0.930001006	0.069998994	0.539317507	0.906483791	0.67627907
251	1	0	1	1	1	0.857621441	0.142378559	0.998039216	0.858347386	0.922937443	0.930001006	0.069998994	0.539317507	0.906483791	0.67627907
251	1	0	1	1	1	0.857621441	0.142378559	0.998039216	0.858347386	0.922937443	0.930001006	0.069998994	0.539317507	0.906483791	0.67627907
251	1	0	1	1	1	0.857621441	0.142378559	0.998039216	0.858347386	0.922937443	0.930001006	0.069998994	0.539317507	0.906483791	0.67627907
251	1	0	1	1	1	0.857621441	0.142378559	0.998039216	0.858347386	0.922937443	0.930001006	0.069998994	0.539317507	0.906483791	0.67627907
251	1	0	1	1	1	0.857621441	0.142378559	0.998039216	0.858347386	0.922937443	0.930001006	0.069998994	0.539317507	0.906483791	0.67627907
251	1	0	1	1	1	0.857621441	0.142378559	0.998039216	0.858347386	0.922937443	0.930001006	0.069998994	0.539317507	0.906483791	0.67627907
251	1	0	1	1	1	0.857621441	0.142378559	0.998039216	0.858347386	0.922937443	0.930001006	0.069998994	0.539317507	0.906483791	0.67627907
251	1	0	1	1	1	0.857621441	0.142378559	0.998039216	0.858347386	0.922937443	0.930001006	0.069998994	0.539317507	0.906483791	0.67627907
251	1	0	1	1	1	0.857621441	0.142378559	0.998039216	0.858347386	0.922937443	0.930001006	0.069998994	0.539317507	0.906483791	0.67627907
251	1	0	1	1	1	0.857621441	0.142378559	0.998039216	0.858347386	0.922937443	0.930001006	0.069998994	0.539317507	0.906483791	0.67627907
251	1	0	1	1	1	0.857621441	0.142378559	0.998039216	0.858347386	0.922937443	0.930001006	0.069998994	0.539317507	0.906483791	0.67627907
251	1	0	1	1	1	0.857621441	0.142378559	0.998039216	0.858347386	0.922937443	0.930001006	0.069998994	0.539317507	0.906483791	0.67627907
251	1	0	1	1	1	0.857621441	0.142378559	0.998039216	0.858347386	0.922937443	0.930001006	0.069998994	0.539317507	0.906483791	0.67627907
251	1	0	1	1	1	0.857621441	0.142378559	0.998039216	0.858347386	0.922937443	0.930001006	0.069998994	0.539317507	0.906483791	0.67627907
251	1	0	1	1	1	0.857621441	0.142378559	0.998039216	0.858347386	0.922937443	0.930001006	0.069998994	0.539317507	0.906483791	0.67627907
251	1	0	1	1	1	0.857621441	0.142378559	0.998039216	0.858347386	0.922937443	0.930001006	0.069998994	0.539317507	0.906483791	0.67627907
251	1	0	1	1	1	0.857621441	0.142378559	0.998039216	0.858347386	0.922937443	0.930001006	0.069998994	0.539317507	0.906483791	0.67627907
251	1	0	1	1	1	0.857621441	0.142378559	0.998039216	0.858347386	0.922937443	0.930001006	0.069998994	0.539317507	0.906483791	0.67627907
251	1	0	1	1	1	0.857621441	0.142378559	0.998039216	0.858347386	0.922937443	0.930001006	0.069998994	0.539317507	0.906483791	0.67627907
251	1	0	1	1	1	0.857621441	0.142378559	0.998039216	0.858347386	0.922937443	0.930001006	0.069998994	0.539317507	0.906483791	0.67627907
251	1	0	1	1	1	0.857621441	0.142378559	0.998039216	0.858347386	0.922937443	0.930001006	0.069998994	0.539317507	0.906483791	0.67627907
251	1	0	1	1	1	0.857621441	0.142378559	0.998039216	0.858347386	0.922937443	0.930001006	0.069998994	0.539317507	0.906483791	0.67627907
251	1	0	1	1	1	0.857621441	0.142378559	0.998039216	0.858347386	0.922937443	0.930001006	0.069998994	0.539317507	0.906483791	0.67627907
251	1	0	1	1	1	0.857621441	0.142378559	0.998039216	0.858347386	0.922937443	0.930001006	0.069998994	0.539317507	0.906483791	0.67627907
251	1	0	1	1	1	0.857621441	0.142378559	0.998039216	0.858347386	0.922937443	0.930001006	0.069998994	0.539317507	0.906483791	0.67627907
251	1	0	1	1	1	0.857621441	0.142378559	0.998039216	0.858347386	0.922937443	0.930001006	0.069998994	0.539317507	0.906483791	0.67627907
251	1	0	1	1	1	0.857621441	0.142378559	0.998039216	0.858347386	0.922937443	0.930001006	0.069998994	0.539317507	0.906483791	0.67627907
251	1	0	1	1	1	0.857621441	0.142378559	0.998039216	0.858347386	0.922937443	0.930001006	0.069998994	0.539317507	0.906483791	0.67627907
251	1	0	1	1	1	0.857621441	0.142378559	0.998039216	0.858347386	0.922937443	0.930001006	0.069998994	0.539317507	0.906483791	0.67627907
251	1	0	1	1	1	0.857621441	0.142378559	0.998039216	0.858347386	0.922937443	0.930001006	0.069998994	0.539317507	0.906483791	0.67627907
251	1	0	1	1	1	0.857621441	0.142378559	0.998039216	0.858347386	0.922937443	0.930001006	0.069998994	0.539317507	0.906483791	0.67627907
251	1	0	1	1	1	0.857621441	0.142378559	0.998039216	0.858347386	0.922937443	0.930001006	0.069998994	0.539317507	0.906483791	0.67627907
251	1	0	1	1	1	0.857621441	0.142378559	0.998039216	0.858347386	0.922937443	0.930001006	0.069998994	0.539317507	0.906483791	0.67627907
251	1	0	1	1	1	0.857621441	0.142378559	0.998039216	0.858347386	0.922937443	0.930001006	0.069998994	0.539317507	0.906483791	0.67627907
251	1	0	1	1	1	0.857621441	0.142378559	0.998039216	0.858347386	0.922937443	0.930001006	0.069998994	0.539317507	0.906483791	0.67627907
251	1	0	1	1	1	0.857621441	0.142378559	0.998039216	0.858347386	0.922937443	0.930001006	0.069998994	0.539317507	0.906483791	0.67627907
251	1	0	1	1	1	0.857621441	0.142378559	0.998039216	0.858347386	0.922937443	0.930001006	0.069998994	0.539317507	0.906483791	0.67627907
251	1	0	1	1	1	0.857621441	0.142378559	0.998039216	0.858347386	0.922937443	0.930001006	0.069998994	0.539317507	0.906483791	0.67627907
251	1	0	1	1	1	0.857621441	0.142378559	0.998039216	0.858347386	0.922937443	0.930001006	0.069998994	0.539317507	0.906483791	0.67627907
251	1	0	1	1	1	0.857621441	0.142378559	0.998039216	0.858347386	0.922937443	0.930001006	0.069998994	0.539317507	0.906483791	0.67627907
251	1	0	1	1	1	0.857621441	0.142378559	0.998039216	0.858347386	0.922937443	0.930001006	0.069998994	0.539317507	0.906483791	0.67627907
251	1	0	1	1	1	0.857621441	0.142378559	0.998039216	0.858347386	0.922937443	0.930001006	0.069998994	0.539317507	0.906483791	0.67627907
251	1	0	1	1	1	0.857621441	0.142378559	0.998039216	0.858347386	0.922937443	0.930001006	0.069998994	0.539317507	0.906483791	0.67627907
251	1	0	1	1	1	0.857621441	0.142378559	0.998039216	0.858347386	0.922937443	0.930001006	0.069998994	0.539317507	0.906483791	0.67627907
251	1	0	1	1	1	0.857621441	0.142378559	0.998039216	0.858347386	0.922937443	0.930001006	0.069998994	0.539317507	0.906483791	0.67627907
251	1	0	1	1	1	0.857621441	0.142378559	0.998039216	0.858347386	0.922937443	0.930001006	0.069998994	0.539317507	0.906483791	0.67627907
251	1	0	1	1	1	0.857621441	0.142378559	0.998039216	0.858347386	0.922937443	0.930001006	0.069998994	0.539317507	0.906483791	0.67627907
251	1	0	1	1	1	0.857621441	0.142378559	0.998039216	0.858347386	0.922937443	0.930001006	0.069998994	0.539317507	0.906483791	0.67627907
251	1	0	1	1	1	0.857621441	0.142378559	0.998039216	0.858347386	0.922937443	0.930001006	0.069998994	0.539317507	0.906483791	0.67627907
251	1	0	1	1	1	0.857621441	0.142378559	0.998039216	0.858347386	0.922937443	0.930001006	0.069998994	0.539317507	0.906483791	0.67627907
251	1	0	1	1	1	0.857621441	0.142378559	0.998039216	0.858347386	0.922937443	0.930001006	0.069998994	0.539317507	0.906483791	0.67627907
251	1	0	1	1	1	0.857621441	0.142378559	0.998039216	0.858347386	0.922937443	0.930001006	0.069998994	0.539317507	0.906483791	0.67627907
251	1	0	1	1	1	0.857621441	0.142378559	0.998039216	0.858347386	0.922937443	0.930001006	0.069998994	0.539317507	0.906483791	0.67627907
251	1	0	1	1	1	0.857621441	0.142378559	0.998039216	0.858347386	0.922937443	0.930001006	0.069998994	0.539317507	0.906483791	0.67627907
251	1	0	1	1	1	0.857621441	0.142378559	0.998039216	0.858347386	0.922937443	0.930001006	0.069998994	0.539317507	0.906483791	0.67627907
251	1	0	1	1	1	0.857621441	0.142378559	0.998039216	0.858347386	0.922937443	0.930001006	0.069998994	0.539317507	0.906483791	0.67627907
251	1	0	1	1	1	0.857621441	0.142378559	0.998039216	0.858347386	0.922937443	0.930001006	0.069998994	0.539317507	0.906483791	0.67627907
251	1	0	1	1	1	0.857621441	0.142378559	0.998039216	0.858347386	0.922937443	0.930001006	0.069998994	0.539317507	0.906483791	0.67627907
251	1	0	1	1	1	0.857621441	0.142378559	0.998039216	0.858347386	0.922937443	0.930001006	0.069998994	0.539317507	0.906483791	0.67627907
251	1	0	1	1	1	0.857621441	0.142378559	0.998039216	0.858347386	0.922937443	0.930001006	0.069998994	0.539317507	0.906483791	0.67627907
251	1	0	1	1	1	0.857621441	0.142378559	0.998039216	0.858347386	0.922937443	0.930001006	0.069998994	0.539317507	0.906483791	0.67627907
251	1	0	1	1	1	0.857621441	0.142378559	0.998039216	0.858347386	0.922937443	0.930001006	0.069998994	0.539317507	0.906483791	0.67627907
251	1	0	1	1	1	0.857621441	0.142378559	0.998039216	0.858347386	0.922937443	0.930001006	0.069998994	0.539317507	0.906483791	0.67627907
251	1	0	1	1	1	0.857621441	0.142378559	0.998039216	0.858347386	0.922937443	0.930001006	0.069998994	0.539317507	0.906483791	0.67627907
251	1	0	1	1	1	0.857621441	0.142378559	0.998039216	0.858347386	0.922937443	0.930001006	0.069998994	0.539317507	0.906483791	0.67627907
251	1	0	1	1	1	0.857621441	0.142378559	0.998039216	0.858347386	0.922937443	0.930001006	0.069998994	0.539317507	0.906483791	0.67627907
251	1	0	1	1	1	0.857621441	0.142378559	0.998039216	0.858347386	0.922937443	0.930001006	0.069998994	0.539317507	0.906483791	0.67627907
251	1	0	1	1	1	0.857621441	0.142378559	0.998039216	0.858347386	0.922937443	0.930001006	0.069998994	0.539317507	0.906483791	0.67627907
251	1	0	1	1	1	0.857621441	0.142378559	0.998039216	0.858347386	0.922937443	0.930001006	0.069998994	0.539317507	0.906483791	0.67627907
251	1	0	1	1	1	0.857621441	0.142378559	0.998039216	0.858347386	0.922937443	0.930001006	0.069998994	0.539317507	0.906483791	0.67627907
251	1	0	1	1	1	0.857621441	0.142378559	0.998039216	0.858347386	0.922937443	0.930001006	0.069998994	0.539317507	0.906483791	0.67627907
251	1	0	1	1	1	0.857621441	0.142378559	0.998039216	0.858347386	0.922937443	0.930001006	0.069998994	0.539317507	0.906483791	0.67627907
251	1	0	1	1	1	0.857621441	0.142378559	0.998039216	0.858347386	0.922937443	0.930001006	0.069998994	0.539317507	0.906483791	0.67627907
251	1	0	1	1	1	0.857621441	0.142378559	0.998039216	0.858347386	0.922937443	0.930001006	0.069998994	0.539317507	0.906483791	0.67627907
251	1	0	1	1	1	0.857621441	0.142378559	0.998039216	0.858347386	0.922937443	0.930001006	0.069998994	0.539317507	0.906483791	0.67627907
251	1	0	1	1	1	0.857621441	0.142378559	0.998039216	0.858347386	0.922937443	0.930001006	0.069998994	0.539317507	0.906483791	0.67627907
251	1	0	1	1	1	0.857621441	0.142378559	0.998039216	0.858347386	0.922937443	0.930001006	0.069998994	0.539317507	0.906483791	0.67627907
251	1	0	1	1	1	0.857621441	0.142378559	0.998039216	0.858347386	0.922937443	0.930001006	0.069998994	0.539317507	0.906483791	0.67627907
251	1	0	1	1	1	0.857621441	0.142378559	0.998039216	0.858347386	0.922937443	0.930001006	0.069998994	0.539317507	0.906483791	0.67627907
251	1	0	1	1	1	0.857621441	0.142378559	0.998039216	0.858347386	0.922937443	0.930001006	0.069998994	0.539317507	0.906483791	0.67627907
251	1	0	1	1	1	0.857621441	0.142378559	0.998039216	0.858347386	0.922937443	0.930001006	0.069998994	0.539317507	0.906483791	0.67627907
251	1	0	1	1	1	0.857621441	0.142378559	0.998039216	0.858347386	0.922937443	0.930001006	0.069998994	0.539317507	0.906483791	0.67627907
251	1	0	1	1	1	0.857621441	0.142378559	0.998039216	0.858347386	0.922937443	0.930001006	0.069998994	0.539317507	0.906483791	0.67627907
251	1	0	1	1	1	0.857621441	0.142378559	0.998039216	0.858347386	0.922937443	0.930001006	0.069998994	0.539317507	0.906483791	0.67627907
251	1	0	1	1	1	0.857621441	0.142378559	0.998039216	0.858347386	0.922937443	0.930001006	0.069998994	0.539317507	0.906483791	0.67627907
251	1	0	1	1	1	0.857621441	0.142378559	0.998039216	0.858347386	0.922937443	0.930001006	0.069998994	0.539317507	0.906483791	0.67627907
251	1	0	1	1	1	0.857621441	0.142378559	0.998039216	0.858347386	0.922937443	0.930001006	0.069998994	0.539317507	0.906483791	0.67627907
251	1	0	1	1	1	0.857621441	0.142378559	0.998039216	0.858347386	0.922937443	0.930001006	0.069998994	0.539317507	0.906483791	0.67627907
251	1	0	1	1	1	0.857621441	0.142378559	0.998039216	0.858347386	0.922937443	0.930001006	0.069998994	0.539317507	0.906483791	0.67627907
251	1	0	1	1	1	0.857621441	0.142378559	0.998039216	0.858347386	0.922937443	0.930001006	0.069998994	0.539317507	0.906483791	0.67627907
250	1	0	1	1	1	0.857621441	0.142378559	0.998039216	0.858347386	0.922937443	0.930001006	0.069998994	0.539317507	0.906483791	0.67627907
250	1	0	1	1	1	0.857621441	0.142378559	0.998039216	0.858347386	0.922937443	0.930001006	0.069998994	0.539317507	0.906483791	0.67627907
250	1	0	1	1	1	0.857621441	0.142378559	0.998039216	0.858347386	0.922937443	0.930001006	0.069998994	0.539317507	0.906483791	0.67627907
250	1	0	1	1	1	0.857621441	0.142378559	0.998039216	0.858347386	0.922937443	0.930001006	0.069998994	0.539317507	0.906483791	0.67627907
250	1	0	1	1	1	0.857621441	0.142378559	0.998039216	0.858347386	0.922937443	0.930001006	0.069998994	0.539317507	0.906483791	0.67627907
250	1	0	1	1	1	0.857621441	0.142378559	0.998039216	0.858347386	0.922937443	0.930001006	0.069998994	0.539317507	0.906483791	0.67627907
250	1	0	1	1	1	0.857621441	0.142378559	0.998039216	0.858347386	0.922937443	0.930001006	0.069998994	0.539317507	0.906483791	0.67627907
250	1	0	1	1	1	0.857621441	0.142378559	0.998039216	0.858347386	0.922937443	0.930001006	0.069998994	0.539317507	0.906483791	0.67627907
250	1	0	1	1	1	0.857621441	0.142378559	0.998039216	0.858347386	0.922937443	0.930001006	0.069998994	0.539317507	0.906483791	0.67627907
250	1	0	1	1	1	0.857621441	0.142378559	0.998039216	0.858347386	0.922937443	0.930001006	0.069998994	0.539317507	0.906483791	0.67627907
250	1	0	1	1	1	0.857621441	0.142378559	0.998039216	0.858347386	0.922937443	0.930001006	0.069998994	0.539317507	0.906483791	0.67627907
250	1	0	1	1	1	0.857621441	0.142378559	0.998039216	0.858347386	0.922937443	0.930001006	0.069998994	0.539317507	0.906483791	0.67627907
250	1	0	1	1	1	0.857621441	0.142378559	0.998039216	0.858347386	0.922937443	0.930001006	0.069998994	0.539317507	0.906483791	0.67627907
250	1	0	1	1	1	0.857621441	0.142378559	0.998039216	0.858347386	0.922937443	0.930001006	0.069998994	0.539317507	0.906483791	0.67627907
250	1	0	1	1	1	0.857621441	0.142378559	0.998039216	0.858347386	0.922937443	0.930001006	0.069998994	0.539317507	0.906483791	0.67627907
250	1	0	1	1	1	0.857621441	0.142378559	0.998039216	0.858347386	0.922937443	0.930001006	0.069998994	0.539317507	0.906483791	0.67627907
250	1	0	1	1	1	0.857621441	0.142378559	0.998039216	0.858347386	0.922937443	0.930001006	0.069998994	0.539317507	0.906483791	0.67627907
250	1	0	1	1	1	0.857621441	0.142378559	0.998039216	0.858347386	0.922937443	0.930001006	0.069998994	0.539317507	0.906483791	0.67627907
250	1	0	1	1	1	0.857621441	0.142378559	0.998039216	0.858347386	0.922937443	0.930001006	0.069998994	0.539317507	0.906483791	0.67627907
250	1	0	1	1	1	0.857621441	0.142378559	0.998039216	0.858347386	0.922937443	0.930001006	0.069998994	0.539317507	0.906483791	0.67627907
250	1	0	1	1	1	0.857621441	0.142378559	0.998039216	0.858347386	0.922937443	0.930001006	0.069998994	0.539317507	0.906483791	0.67627907
250	1	0	1	1	1	0.857621441	0.142378559	0.998039216	0.858347386	0.922937443	0.930001006	0.069998994	0.539317507	0.906483791	0.67627907
250	1	0	1	1	1	0.857621441	0.142378559	0.998039216	0.858347386	0.922937443	0.930001006	0.069998994	0.539317507	0.906483791	0.67627907
250	1	0	1	1	1	0.857621441	0.142378559	0.998039216	0.858347386	0.922937443	0.930001006	0.069998994	0.539317507	0.906483791	0.67627907
250	1	0	1	1	1	0.857621441	0.142378559	0.998039216	0.858347386	0.922937443	0.930001006	0.069998994	0.539317507	0.906483791	0.67627907
250	1	0	1	1	1	0.857621441	0.142378559	0.998039216	0.858347386	0.922937443	0.930001006	0.069998994	0.539317507	0.906483791	0.67627907
250	1	0	1	1	1	0.857621441	0.142378559	0.998039216	0.858347386	0.922937443	0.930001006	0.069998994	0.539317507	0.906483791	0.67627907
250	1	0	1	1	1	0.857621441	0.142378559	0.998039216	0.858347386	0.922937443	0.930001006	0.069998994	0.539317507	0.906483791	0.67627907
250	1	0	1	1	1	0.857621441	0.142378559	0.998039216	0.858347386	0.922937443	0.930001006	0.069998994	0.539317507	0.906483791	0.67627907
250	1	0	1	1	1	0.857621441	0.142378559	0.998039216	0.858347386	0.922937443	0.930001006	0.069998994	0.539317507	0.906483791	0.67627907
250	1	0	1	1	1	0.857621441	0.142378559	0.998039216	0.858347386	0.922937443	0.930001006	0.069998994	0.539317507	0.906483791	0.67627907
250	1	0	1	1	1	0.857621441	0.142378559	0.998039216	0.858347386	0.922937443	0.930001006	0.069998994	0.539317507	0.906483791	0.67627907
250	1	0	1	1	1	0.857621441	0.142378559	0.998039216	0.858347386	0.922937443	0.930001006	0.069998994	0.539317507	0.906483791	0.67627907
250	1	0	1	1	1	0.857621441	0.142378559	0.998039216	0.858347386	0.922937443	0.930001006	0.069998994	0.539317507	0.906483791	0.67627907
250	1	0	1	1	1	0.857621441	0.142378559	0.998039216	0.858347386	0.922937443	0.930001006	0.069998994	0.539317507	0.906483791	0.67627907
250	1	0	1	1	1	0.857621441	0.142378559	0.998039216	0.858347386	0.922937443	0.930001006	0.069998994	0.539317507	0.906483791	0.67627907
250	1	0	1	1	1	0.857621441	0.142378559	0.998039216	0.858347386	0.922937443	0.930001006	0.069998994	0.539317507	0.906483791	0.67627907
250	1	0	1	1	1	0.857621441	0.142378559	0.998039216	0.858347386	0.922937443	0.930001006	0.069998994	0.539317507	0.906483791	0.67627907
250	1	0	1	1	1	0.857621441	0.142378559	0.998039216	0.858347386	0.922937443	0.930001006	0.069998994	0.539317507	0.906483791	0.67627907
250	1	0	1	1	1	0.857621441	0.142378559	0.998039216	0.858347386	0.922937443	0.930001006	0.069998994	0.539317507	0.906483791	0.67627907
250	1	0	1	1	1	0.857621441	0.142378559	0.998039216	0.858347386	0.922937443	0.930001006	0.069998994	0.539317507	0.906483791	0.67627907
250	1	0	1	1	1	0.857621441	0.142378559	0.998039216	0.858347386	0.922937443	0.930001006	0.069998994	0.539317507	0.906483791	0.67627907
250	1	0	1	1	1	0.857621441	0.142378559	0.998039216	0.858347386	0.922937443	0.930001006	0.069998994	0.539317507	0.906483791	0.67627907
250	1	0	1	1	1	0.857621441	0.142378559	0.998039216	0.858347386	0.922937443	0.930001006	0.069998994	0.539317507	0.906483791	0.67627907
250	1	0	1	1	1	0.857621441	0.142378559	0.998039216	0.858347386	0.922937443	0.930001006	0.069998994	0.539317507	0.906483791	0.67627907
250	1	0	1	1	1	0.857621441	0.142378559	0.998039216	0.858347386	0.922937443	0.930001006	0.069998994	0.539317507	0.906483791	0.67627907
250	1	0	1	1	1	0.857621441	0.142378559	0.998039216	0.858347386	0.922937443	0.930001006	0.069998994	0.539317507	0.906483791	0.67627907
250	1	0	1	1	1	0.857621441	0.142378559	0.998039216	0.858347386	0.922937443	0.930001006	0.069998994	0.539317507	0.906483791	0.67627907
250	1	0	1	1	1	0.857621441	0.142378559	0.998039216	0.858347386	0.922937443	0.930001006	0.069998994	0.539317507	0.906483791	0.67627907
250	1	0	1	1	1	0.857621441	0.142378559	0.998039216	0.858347386	0.922937443	0.930001006	0.069998994	0.539317507	0.906483791	0.67627907
250	1	0	1	1	1	0.857621441	0.142378559	0.998039216	0.858347386	0.922937443	0.930001006	0.069998994	0.539317507	0.906483791	0.67627907
250	1	0	1	1	1	0.857621441	0.142378559	0.998039216	0.858347386	0.922937443	0.930001006	0.069998994	0.539317507	0.906483791	0.67627907
250	1	0	1	1	1	0.857621441	0.142378559	0.998039216	0.858347386	0.922937443	0.930001006	0.069998994	0.539317507	0.906483791	0.67627907
250	1	0	1	1	1	0.857621441	0.142378559	0.998039216	0.858347386	0.922937443	0.930001006	0.069998994	0.539317507	0.906483791	0.67627907
250	1	0	1	1	1	0.857621441	0.142378559	0.998039216	0.858347386	0.922937443	0.930001006	0.069998994	0.539317507	0.906483791	0.67627907
250	1	0	1	1	1	0.857621441	0.142378559	0.998039216	0.858347386	0.922937443	0.930001006	0.069998994	0.539317507	0.906483791	0.67627907
249	1	0	1	1	1	0.859296482	0.140703518	0.998043053	0.860033727	0.923913043	0.930001006	0.069998994	0.539317507	0.906483791	0.67627907
249	1	0	1	1	1	0.859296482	0.140703518	0.998043053	0.860033727	0.923913043	0.930001006	0.069998994	0.539317507	0.906483791	0.67627907
249	1	0	1	1	1	0.859296482	0.140703518	0.998043053	0.860033727	0.923913043	0.930001006	0.069998994	0.539317507	0.906483791	0.67627907
249	1	0	1	1	1	0.859296482	0.140703518	0.998043053	0.860033727	0.923913043	0.930001006	0.069998994	0.539317507	0.906483791	0.67627907
249	1	0	1	1	1	0.859296482	0.140703518	0.998043053	0.860033727	0.923913043	0.930001006	0.069998994	0.539317507	0.906483791	0.67627907
249	1	0	1	1	1	0.859296482	0.140703518	0.998043053	0.860033727	0.923913043	0.930001006	0.069998994	0.539317507	0.906483791	0.67627907
249	1	0	1	1	1	0.859296482	0.140703518	0.998043053	0.860033727	0.923913043	0.930001006	0.069998994	0.539317507	0.906483791	0.67627907
249	1	0	1	1	1	0.859296482	0.140703518	0.998043053	0.860033727	0.923913043	0.930001006	0.069998994	0.539317507	0.906483791	0.67627907
249	1	0	1	1	1	0.859296482	0.140703518	0.998043053	0.860033727	0.923913043	0.930001006	0.069998994	0.539317507	0.906483791	0.67627907
249	1	0	1	1	1	0.859296482	0.140703518	0.998043053	0.860033727	0.923913043	0.930001006	0.069998994	0.539317507	0.906483791	0.67627907
249	1	0	1	1	1	0.859296482	0.140703518	0.998043053	0.860033727	0.923913043	0.930001006	0.069998994	0.539317507	0.906483791	0.67627907
249	1	0	1	1	1	0.859296482	0.140703518	0.998043053	0.860033727	0.923913043	0.930001006	0.069998994	0.539317507	0.906483791	0.67627907
249	1	0	1	1	1	0.859296482	0.140703518	0.998043053	0.860033727	0.923913043	0.930001006	0.069998994	0.539317507	0.906483791	0.67627907
249	1	0	1	1	1	0.859296482	0.140703518	0.998043053	0.860033727	0.923913043	0.930001006	0.069998994	0.539317507	0.906483791	0.67627907
249	1	0	1	1	1	0.859296482	0.140703518	0.998043053	0.860033727	0.923913043	0.930001006	0.069998994	0.539317507	0.906483791	0.67627907
249	1	0	1	1	1	0.859296482	0.140703518	0.998043053	0.860033727	0.923913043	0.930001006	0.069998994	0.539317507	0.906483791	0.67627907
249	1	0	1	1	1	0.859296482	0.140703518	0.998043053	0.860033727	0.923913043	0.930001006	0.069998994	0.539317507	0.906483791	0.67627907
249	1	0	1	1	1	0.859296482	0.140703518	0.998043053	0.860033727	0.923913043	0.930001006	0.069998994	0.539317507	0.906483791	0.67627907
249	1	0	1	1	1	0.859296482	0.140703518	0.998043053	0.860033727	0.923913043	0.930001006	0.069998994	0.539317507	0.906483791	0.67627907
249	1	0	1	1	1	0.859296482	0.140703518	0.998043053	0.860033727	0.923913043	0.930001006	0.069998994	0.539317507	0.906483791	0.67627907
249	1	0	1	1	1	0.859296482	0.140703518	0.998043053	0.860033727	0.923913043	0.930001006	0.069998994	0.539317507	0.906483791	0.67627907
249	1	0	1	1	1	0.859296482	0.140703518	0.998043053	0.860033727	0.923913043	0.930001006	0.069998994	0.539317507	0.906483791	0.67627907
249	1	0	1	1	1	0.859296482	0.140703518	0.998043053	0.860033727	0.923913043	0.930001006	0.069998994	0.539317507	0.906483791	0.67627907
249	1	0	1	1	1	0.859296482	0.140703518	0.998043053	0.860033727	0.923913043	0.930001006	0.069998994	0.539317507	0.906483791	0.67627907
249	1	0	1	1	1	0.859296482	0.140703518	0.998043053	0.860033727	0.923913043	0.930001006	0.069998994	0.539317507	0.906483791	0.67627907
249	1	0	1	1	1	0.859296482	0.140703518	0.998043053	0.860033727	0.923913043	0.930001006	0.069998994	0.539317507	0.906483791	0.67627907
249	1	0	1	1	1	0.859296482	0.140703518	0.998043053	0.860033727	0.923913043	0.930001006	0.069998994	0.539317507	0.906483791	0.67627907
249	1	0	1	1	1	0.859296482	0.140703518	0.998043053	0.860033727	0.923913043	0.930001006	0.069998994	0.539317507	0.906483791	0.67627907
249	1	0	1	1	1	0.859296482	0.140703518	0.998043053	0.860033727	0.923913043	0.930001006	0.069998994	0.539317507	0.906483791	0.67627907
249	1	0	1	1	1	0.859296482	0.140703518	0.998043053	0.860033727	0.923913043	0.930001006	0.069998994	0.539317507	0.906483791	0.67627907
249	1	0	1	1	1	0.859296482	0.140703518	0.998043053	0.860033727	0.923913043	0.930001006	0.069998994	0.539317507	0.906483791	0.67627907
249	1	0	1	1	1	0.859296482	0.140703518	0.998043053	0.860033727	0.923913043	0.930001006	0.069998994	0.539317507	0.906483791	0.67627907
249	1	0	1	1	1	0.859296482	0.140703518	0.998043053	0.860033727	0.923913043	0.930001006	0.069998994	0.539317507	0.906483791	0.67627907
248	1	0	1	1	1	0.837563452	0.162436548	1	0.836734694	0.911111111	0.933561162	0.066438838	0.553519062	0.935563817	0.695532013
248	1	0	1	1	1	0.837563452	0.162436548	1	0.836734694	0.911111111	0.933561162	0.066438838	0.553519062	0.935563817	0.695532013
247	1	0	1	1	1	0.839255499	0.160744501	1	0.838435374	0.912118409	0.933561162	0.066438838	0.553519062	0.935563817	0.695532013
246	1	0	1	1	1	0.838709677	0.161290323	1	0.837883959	0.911792015	0.933574515	0.066425485	0.554172767	0.935723115	0.696091954
246	1	0	1	1	1	0.838709677	0.161290323	1	0.837883959	0.911792015	0.933574515	0.066425485	0.554172767	0.935723115	0.696091954
246	1	0	1	1	1	0.838709677	0.161290323	1	0.837883959	0.911792015	0.933574515	0.066425485	0.554172767	0.935723115	0.696091954
246	1	0	1	1	1	0.838709677	0.161290323	1	0.837883959	0.911792015	0.933574515	0.066425485	0.554172767	0.935723115	0.696091954
245	1	0	1	1	1	0.838709677	0.161290323	1	0.837883959	0.911792015	0.933574515	0.066425485	0.554172767	0.935723115	0.696091954
244	1	0	1	1	1	0.767272727	0.232727273	1	0.767272727	0.868312757	0.954954955	0.045045045	0.660438668	0.962130178	0.783236994
244	1	0	1	1	1	0.767272727	0.232727273	1	0.767272727	0.868312757	0.954954955	0.045045045	0.660438668	0.962130178	0.783236994
244	1	0	1	1	1	0.767272727	0.232727273	1	0.767272727	0.868312757	0.954954955	0.045045045	0.660438668	0.962130178	0.783236994
244	1	0	1	1	1	0.767272727	0.232727273	1	0.767272727	0.868312757	0.954954955	0.045045045	0.660438668	0.962130178	0.783236994
244	1	0	1	1	1	0.767272727	0.232727273	1	0.767272727	0.868312757	0.954954955	0.045045045	0.660438668	0.962130178	0.783236994
243	1	0	1	1	1	0.777777778	0.222222222	1	0.777777778	0.875	0.957177081	0.042822919	0.680194805	0.959908362	0.796199525
243	1	0	1	1	1	0.777777778	0.222222222	1	0.777777778	0.875	0.957177081	0.042822919	0.680194805	0.959908362	0.796199525
243	1	0	1	1	1	0.777777778	0.222222222	1	0.777777778	0.875	0.957177081	0.042822919	0.680194805	0.959908362	0.796199525
243	1	0	1	1	1	0.777777778	0.222222222	1	0.777777778	0.875	0.957177081	0.042822919	0.680194805	0.959908362	0.796199525
243	1	0	1	1	1	0.777777778	0.222222222	1	0.777777778	0.875	0.957177081	0.042822919	0.680194805	0.959908362	0.796199525
243	1	0	1	1	1	0.777777778	0.222222222	1	0.777777778	0.875	0.957177081	0.042822919	0.680194805	0.959908362	0.796199525
243	1	0	1	1	1	0.777777778	0.222222222	1	0.777777778	0.875	0.957177081	0.042822919	0.680194805	0.959908362	0.796199525
243	1	0	1	1	1	0.777777778	0.222222222	1	0.777777778	0.875	0.957177081	0.042822919	0.680194805	0.959908362	0.796199525
243	1	0	1	1	1	0.777777778	0.222222222	1	0.777777778	0.875	0.957177081	0.042822919	0.680194805	0.959908362	0.796199525
243	1	0	1	1	1	0.777777778	0.222222222	1	0.777777778	0.875	0.957177081	0.042822919	0.680194805	0.959908362	0.796199525
243	1	0	1	1	1	0.777777778	0.222222222	1	0.777777778	0.875	0.957177081	0.042822919	0.680194805	0.959908362	0.796199525
243	1	0	1	1	1	0.777777778	0.222222222	1	0.777777778	0.875	0.957177081	0.042822919	0.680194805	0.959908362	0.796199525
243	1	0	1	1	1	0.777777778	0.222222222	1	0.777777778	0.875	0.957177081	0.042822919	0.680194805	0.959908362	0.796199525
243	1	0	1	1	1	0.777777778	0.222222222	1	0.777777778	0.875	0.957177081	0.042822919	0.680194805	0.959908362	0.796199525
243	1	0	1	1	1	0.777777778	0.222222222	1	0.777777778	0.875	0.957177081	0.042822919	0.680194805	0.959908362	0.796199525
243	1	0	1	1	1	0.777777778	0.222222222	1	0.777777778	0.875	0.957177081	0.042822919	0.680194805	0.959908362	0.796199525
243	1	0	1	1	1	0.777777778	0.222222222	1	0.777777778	0.875	0.957177081	0.042822919	0.680194805	0.959908362	0.796199525
243	1	0	1	1	1	0.777777778	0.222222222	1	0.777777778	0.875	0.957177081	0.042822919	0.680194805	0.959908362	0.796199525
243	1	0	1	1	1	0.777777778	0.222222222	1	0.777777778	0.875	0.957177081	0.042822919	0.680194805	0.959908362	0.796199525
243	1	0	1	1	1	0.777777778	0.222222222	1	0.777777778	0.875	0.957177081	0.042822919	0.680194805	0.959908362	0.796199525
243	1	0	1	1	1	0.777777778	0.222222222	1	0.777777778	0.875	0.957177081	0.042822919	0.680194805	0.959908362	0.796199525
243	1	0	1	1	1	0.777777778	0.222222222	1	0.777777778	0.875	0.957177081	0.042822919	0.680194805	0.959908362	0.796199525
243	1	0	1	1	1	0.777777778	0.222222222	1	0.777777778	0.875	0.957177081	0.042822919	0.680194805	0.959908362	0.796199525
243	1	0	1	1	1	0.777777778	0.222222222	1	0.777777778	0.875	0.957177081	0.042822919	0.680194805	0.959908362	0.796199525
243	1	0	1	1	1	0.777777778	0.222222222	1	0.777777778	0.875	0.957177081	0.042822919	0.680194805	0.959908362	0.796199525
243	1	0	1	1	1	0.777777778	0.222222222	1	0.777777778	0.875	0.957177081	0.042822919	0.680194805	0.959908362	0.796199525
243	1	0	1	1	1	0.777777778	0.222222222	1	0.777777778	0.875	0.957177081	0.042822919	0.680194805	0.959908362	0.796199525
243	1	0	1	1	1	0.777777778	0.222222222	1	0.777777778	0.875	0.957177081	0.042822919	0.680194805	0.959908362	0.796199525
243	1	0	1	1	1	0.777777778	0.222222222	1	0.777777778	0.875	0.957177081	0.042822919	0.680194805	0.959908362	0.796199525
243	1	0	1	1	1	0.777777778	0.222222222	1	0.777777778	0.875	0.957177081	0.042822919	0.680194805	0.959908362	0.796199525
243	1	0	1	1	1	0.777777778	0.222222222	1	0.777777778	0.875	0.957177081	0.042822919	0.680194805	0.959908362	0.796199525
243	1	0	1	1	1	0.777777778	0.222222222	1	0.777777778	0.875	0.957177081	0.042822919	0.680194805	0.959908362	0.796199525
243	1	0	1	1	1	0.777777778	0.222222222	1	0.777777778	0.875	0.957177081	0.042822919	0.680194805	0.959908362	0.796199525
243	1	0	1	1	1	0.777777778	0.222222222	1	0.777777778	0.875	0.957177081	0.042822919	0.680194805	0.959908362	0.796199525
243	1	0	1	1	1	0.777777778	0.222222222	1	0.777777778	0.875	0.957177081	0.042822919	0.680194805	0.959908362	0.796199525
243	1	0	1	1	1	0.777777778	0.222222222	1	0.777777778	0.875	0.957177081	0.042822919	0.680194805	0.959908362	0.796199525
243	1	0	1	1	1	0.777777778	0.222222222	1	0.777777778	0.875	0.957177081	0.042822919	0.680194805	0.959908362	0.796199525
243	1	0	1	1	1	0.777777778	0.222222222	1	0.777777778	0.875	0.957177081	0.042822919	0.680194805	0.959908362	0.796199525
243	1	0	1	1	1	0.777777778	0.222222222	1	0.777777778	0.875	0.957177081	0.042822919	0.680194805	0.959908362	0.796199525
243	1	0	1	1	1	0.777777778	0.222222222	1	0.777777778	0.875	0.957177081	0.042822919	0.680194805	0.959908362	0.796199525
243	1	0	1	1	1	0.777777778	0.222222222	1	0.777777778	0.875	0.957177081	0.042822919	0.680194805	0.959908362	0.796199525
243	1	0	1	1	1	0.777777778	0.222222222	1	0.777777778	0.875	0.957177081	0.042822919	0.680194805	0.959908362	0.796199525
243	1	0	1	1	1	0.777777778	0.222222222	1	0.777777778	0.875	0.957177081	0.042822919	0.680194805	0.959908362	0.796199525
243	1	0	1	1	1	0.777777778	0.222222222	1	0.777777778	0.875	0.957177081	0.042822919	0.680194805	0.959908362	0.796199525
243	1	0	1	1	1	0.777777778	0.222222222	1	0.777777778	0.875	0.957177081	0.042822919	0.680194805	0.959908362	0.796199525
243	1	0	1	1	1	0.777777778	0.222222222	1	0.777777778	0.875	0.957177081	0.042822919	0.680194805	0.959908362	0.796199525
243	1	0	1	1	1	0.777777778	0.222222222	1	0.777777778	0.875	0.957177081	0.042822919	0.680194805	0.959908362	0.796199525
243	1	0	1	1	1	0.777777778	0.222222222	1	0.777777778	0.875	0.957177081	0.042822919	0.680194805	0.959908362	0.796199525
243	1	0	1	1	1	0.777777778	0.222222222	1	0.777777778	0.875	0.957177081	0.042822919	0.680194805	0.959908362	0.796199525
243	1	0	1	1	1	0.777777778	0.222222222	1	0.777777778	0.875	0.957177081	0.042822919	0.680194805	0.959908362	0.796199525
243	1	0	1	1	1	0.777777778	0.222222222	1	0.777777778	0.875	0.957177081	0.042822919	0.680194805	0.959908362	0.796199525
243	1	0	1	1	1	0.777777778	0.222222222	1	0.777777778	0.875	0.957177081	0.042822919	0.680194805	0.959908362	0.796199525
243	1	0	1	1	1	0.777777778	0.222222222	1	0.777777778	0.875	0.957177081	0.042822919	0.680194805	0.959908362	0.796199525
243	1	0	1	1	1	0.777777778	0.222222222	1	0.777777778	0.875	0.957177081	0.042822919	0.680194805	0.959908362	0.796199525
243	1	0	1	1	1	0.777777778	0.222222222	1	0.777777778	0.875	0.957177081	0.042822919	0.680194805	0.959908362	0.796199525
243	1	0	1	1	1	0.777777778	0.222222222	1	0.777777778	0.875	0.957177081	0.042822919	0.680194805	0.959908362	0.796199525
243	1	0	1	1	1	0.777777778	0.222222222	1	0.777777778	0.875	0.957177081	0.042822919	0.680194805	0.959908362	0.796199525
243	1	0	1	1	1	0.777777778	0.222222222	1	0.777777778	0.875	0.957177081	0.042822919	0.680194805	0.959908362	0.796199525
243	1	0	1	1	1	0.777777778	0.222222222	1	0.777777778	0.875	0.957177081	0.042822919	0.680194805	0.959908362	0.796199525
243	1	0	1	1	1	0.777777778	0.222222222	1	0.777777778	0.875	0.957177081	0.042822919	0.680194805	0.959908362	0.796199525
243	1	0	1	1	1	0.777777778	0.222222222	1	0.777777778	0.875	0.957177081	0.042822919	0.680194805	0.959908362	0.796199525
243	1	0	1	1	1	0.777777778	0.222222222	1	0.777777778	0.875	0.957177081	0.042822919	0.680194805	0.959908362	0.796199525
243	1	0	1	1	1	0.777777778	0.222222222	1	0.777777778	0.875	0.957177081	0.042822919	0.680194805	0.959908362	0.796199525
243	1	0	1	1	1	0.777777778	0.222222222	1	0.777777778	0.875	0.957177081	0.042822919	0.680194805	0.959908362	0.796199525
243	1	0	1	1	1	0.777777778	0.222222222	1	0.777777778	0.875	0.957177081	0.042822919	0.680194805	0.959908362	0.796199525
243	1	0	1	1	1	0.777777778	0.222222222	1	0.777777778	0.875	0.957177081	0.042822919	0.680194805	0.959908362	0.796199525
243	1	0	1	1	1	0.777777778	0.222222222	1	0.777777778	0.875	0.957177081	0.042822919	0.680194805	0.959908362	0.796199525
243	1	0	1	1	1	0.777777778	0.222222222	1	0.777777778	0.875	0.957177081	0.042822919	0.680194805	0.959908362	0.796199525
243	1	0	1	1	1	0.777777778	0.222222222	1	0.777777778	0.875	0.957177081	0.042822919	0.680194805	0.959908362	0.796199525
243	1	0	1	1	1	0.777777778	0.222222222	1	0.777777778	0.875	0.957177081	0.042822919	0.680194805	0.959908362	0.796199525
243	1	0	1	1	1	0.777777778	0.222222222	1	0.777777778	0.875	0.957177081	0.042822919	0.680194805	0.959908362	0.796199525
243	1	0	1	1	1	0.777777778	0.222222222	1	0.777777778	0.875	0.957177081	0.042822919	0.680194805	0.959908362	0.796199525
243	1	0	1	1	1	0.777777778	0.222222222	1	0.777777778	0.875	0.957177081	0.042822919	0.680194805	0.959908362	0.796199525
243	1	0	1	1	1	0.777777778	0.222222222	1	0.777777778	0.875	0.957177081	0.042822919	0.680194805	0.959908362	0.796199525
243	1	0	1	1	1	0.777777778	0.222222222	1	0.777777778	0.875	0.957177081	0.042822919	0.680194805	0.959908362	0.796199525
243	1	0	1	1	1	0.777777778	0.222222222	1	0.777777778	0.875	0.957177081	0.042822919	0.680194805	0.959908362	0.796199525
243	1	0	1	1	1	0.777777778	0.222222222	1	0.777777778	0.875	0.957177081	0.042822919	0.680194805	0.959908362	0.796199525
243	1	0	1	1	1	0.777777778	0.222222222	1	0.777777778	0.875	0.957177081	0.042822919	0.680194805	0.959908362	0.796199525
243	1	0	1	1	1	0.777777778	0.222222222	1	0.777777778	0.875	0.957177081	0.042822919	0.680194805	0.959908362	0.796199525
243	1	0	1	1	1	0.777777778	0.222222222	1	0.777777778	0.875	0.957177081	0.042822919	0.680194805	0.959908362	0.796199525
243	1	0	1	1	1	0.777777778	0.222222222	1	0.777777778	0.875	0.957177081	0.042822919	0.680194805	0.959908362	0.796199525
243	1	0	1	1	1	0.777777778	0.222222222	1	0.777777778	0.875	0.957177081	0.042822919	0.680194805	0.959908362	0.796199525
243	1	0	1	1	1	0.777777778	0.222222222	1	0.777777778	0.875	0.957177081	0.042822919	0.680194805	0.959908362	0.796199525
243	1	0	1	1	1	0.777777778	0.222222222	1	0.777777778	0.875	0.957177081	0.042822919	0.680194805	0.959908362	0.796199525
243	1	0	1	1	1	0.777777778	0.222222222	1	0.777777778	0.875	0.957177081	0.042822919	0.680194805	0.959908362	0.796199525
243	1	0	1	1	1	0.777777778	0.222222222	1	0.777777778	0.875	0.957177081	0.042822919	0.680194805	0.959908362	0.796199525
243	1	0	1	1	1	0.777777778	0.222222222	1	0.777777778	0.875	0.957177081	0.042822919	0.680194805	0.959908362	0.796199525
243	1	0	1	1	1	0.777777778	0.222222222	1	0.777777778	0.875	0.957177081	0.042822919	0.680194805	0.959908362	0.796199525
243	1	0	1	1	1	0.777777778	0.222222222	1	0.777777778	0.875	0.957177081	0.042822919	0.680194805	0.959908362	0.796199525
243	1	0	1	1	1	0.777777778	0.222222222	1	0.777777778	0.875	0.957177081	0.042822919	0.680194805	0.959908362	0.796199525
243	1	0	1	1	1	0.777777778	0.222222222	1	0.777777778	0.875	0.957177081	0.042822919	0.680194805	0.959908362	0.796199525
243	1	0	1	1	1	0.777777778	0.222222222	1	0.777777778	0.875	0.957177081	0.042822919	0.680194805	0.959908362	0.796199525
243	1	0	1	1	1	0.777777778	0.222222222	1	0.777777778	0.875	0.957177081	0.042822919	0.680194805	0.959908362	0.796199525
243	1	0	1	1	1	0.777777778	0.222222222	1	0.777777778	0.875	0.957177081	0.042822919	0.680194805	0.959908362	0.796199525
243	1	0	1	1	1	0.777777778	0.222222222	1	0.777777778	0.875	0.957177081	0.042822919	0.680194805	0.959908362	0.796199525
243	1	0	1	1	1	0.777777778	0.222222222	1	0.777777778	0.875	0.957177081	0.042822919	0.680194805	0.959908362	0.796199525
243	1	0	1	1	1	0.777777778	0.222222222	1	0.777777778	0.875	0.957177081	0.042822919	0.680194805	0.959908362	0.796199525
243	1	0	1	1	1	0.777777778	0.222222222	1	0.777777778	0.875	0.957177081	0.042822919	0.680194805	0.959908362	0.796199525
243	1	0	1	1	1	0.777777778	0.222222222	1	0.777777778	0.875	0.957177081	0.042822919	0.680194805	0.959908362	0.796199525
243	1	0	1	1	1	0.777777778	0.222222222	1	0.777777778	0.875	0.957177081	0.042822919	0.680194805	0.959908362	0.796199525
243	1	0	1	1	1	0.777777778	0.222222222	1	0.777777778	0.875	0.957177081	0.042822919	0.680194805	0.959908362	0.796199525
243	1	0	1	1	1	0.777777778	0.222222222	1	0.777777778	0.875	0.957177081	0.042822919	0.680194805	0.959908362	0.796199525
243	1	0	1	1	1	0.777777778	0.222222222	1	0.777777778	0.875	0.957177081	0.042822919	0.680194805	0.959908362	0.796199525
243	1	0	1	1	1	0.777777778	0.222222222	1	0.777777778	0.875	0.957177081	0.042822919	0.680194805	0.959908362	0.796199525
243	1	0	1	1	1	0.777777778	0.222222222	1	0.777777778	0.875	0.957177081	0.042822919	0.680194805	0.959908362	0.796199525
243	1	0	1	1	1	0.777777778	0.222222222	1	0.777777778	0.875	0.957177081	0.042822919	0.680194805	0.959908362	0.796199525
243	1	0	1	1	1	0.777777778	0.222222222	1	0.777777778	0.875	0.957177081	0.042822919	0.680194805	0.959908362	0.796199525
243	1	0	1	1	1	0.777777778	0.222222222	1	0.777777778	0.875	0.957177081	0.042822919	0.680194805	0.959908362	0.796199525
243	1	0	1	1	1	0.777777778	0.222222222	1	0.777777778	0.875	0.957177081	0.042822919	0.680194805	0.959908362	0.796199525
243	1	0	1	1	1	0.777777778	0.222222222	1	0.777777778	0.875	0.957177081	0.042822919	0.680194805	0.959908362	0.796199525
243	1	0	1	1	1	0.777777778	0.222222222	1	0.777777778	0.875	0.957177081	0.042822919	0.680194805	0.959908362	0.796199525
243	1	0	1	1	1	0.777777778	0.222222222	1	0.777777778	0.875	0.957177081	0.042822919	0.680194805	0.959908362	0.796199525
243	1	0	1	1	1	0.777777778	0.222222222	1	0.777777778	0.875	0.957177081	0.042822919	0.680194805	0.959908362	0.796199525
243	1	0	1	1	1	0.777777778	0.222222222	1	0.777777778	0.875	0.957177081	0.042822919	0.680194805	0.959908362	0.796199525
243	1	0	1	1	1	0.777777778	0.222222222	1	0.777777778	0.875	0.957177081	0.042822919	0.680194805	0.959908362	0.796199525
243	1	0	1	1	1	0.777777778	0.222222222	1	0.777777778	0.875	0.957177081	0.042822919	0.680194805	0.959908362	0.796199525
243	1	0	1	1	1	0.777777778	0.222222222	1	0.777777778	0.875	0.957177081	0.042822919	0.680194805	0.959908362	0.796199525
243	1	0	1	1	1	0.777777778	0.222222222	1	0.777777778	0.875	0.957177081	0.042822919	0.680194805	0.959908362	0.796199525
243	1	0	1	1	1	0.777777778	0.222222222	1	0.777777778	0.875	0.957177081	0.042822919	0.680194805	0.959908362	0.796199525
243	1	0	1	1	1	0.777777778	0.222222222	1	0.777777778	0.875	0.957177081	0.042822919	0.680194805	0.959908362	0.796199525
243	1	0	1	1	1	0.777777778	0.222222222	1	0.777777778	0.875	0.957177081	0.042822919	0.680194805	0.959908362	0.796199525
243	1	0	1	1	1	0.777777778	0.222222222	1	0.777777778	0.875	0.957177081	0.042822919	0.680194805	0.959908362	0.796199525
243	1	0	1	1	1	0.777777778	0.222222222	1	0.777777778	0.875	0.957177081	0.042822919	0.680194805	0.959908362	0.796199525
243	1	0	1	1	1	0.777777778	0.222222222	1	0.777777778	0.875	0.957177081	0.042822919	0.680194805	0.959908362	0.796199525
243	1	0	1	1	1	0.777777778	0.222222222	1	0.777777778	0.875	0.957177081	0.042822919	0.680194805	0.959908362	0.796199525
243	1	0	1	1	1	0.777777778	0.222222222	1	0.777777778	0.875	0.957177081	0.042822919	0.680194805	0.959908362	0.796199525
243	1	0	1	1	1	0.777777778	0.222222222	1	0.777777778	0.875	0.957177081	0.042822919	0.680194805	0.959908362	0.796199525
243	1	0	1	1	1	0.777777778	0.222222222	1	0.777777778	0.875	0.957177081	0.042822919	0.680194805	0.959908362	0.796199525
243	1	0	1	1	1	0.777777778	0.222222222	1	0.777777778	0.875	0.957177081	0.042822919	0.680194805	0.959908362	0.796199525
243	1	0	1	1	1	0.777777778	0.222222222	1	0.777777778	0.875	0.957177081	0.042822919	0.680194805	0.959908362	0.796199525
243	1	0	1	1	1	0.777777778	0.222222222	1	0.777777778	0.875	0.957177081	0.042822919	0.680194805	0.959908362	0.796199525
243	1	0	1	1	1	0.777777778	0.222222222	1	0.777777778	0.875	0.957177081	0.042822919	0.680194805	0.959908362	0.796199525
243	1	0	1	1	1	0.777777778	0.222222222	1	0.777777778	0.875	0.957177081	0.042822919	0.680194805	0.959908362	0.796199525
243	1	0	1	1	1	0.777777778	0.222222222	1	0.777777778	0.875	0.957177081	0.042822919	0.680194805	0.959908362	0.796199525
243	1	0	1	1	1	0.777777778	0.222222222	1	0.777777778	0.875	0.957177081	0.042822919	0.680194805	0.959908362	0.796199525
243	1	0	1	1	1	0.777777778	0.222222222	1	0.777777778	0.875	0.957177081	0.042822919	0.680194805	0.959908362	0.796199525
243	1	0	1	1	1	0.777777778	0.222222222	1	0.777777778	0.875	0.957177081	0.042822919	0.680194805	0.959908362	0.796199525
243	1	0	1	1	1	0.777777778	0.222222222	1	0.777777778	0.875	0.957177081	0.042822919	0.680194805	0.959908362	0.796199525
243	1	0	1	1	1	0.777777778	0.222222222	1	0.777777778	0.875	0.957177081	0.042822919	0.680194805	0.959908362	0.796199525
243	1	0	1	1	1	0.777777778	0.222222222	1	0.777777778	0.875	0.957177081	0.042822919	0.680194805	0.959908362	0.796199525
243	1	0	1	1	1	0.777777778	0.222222222	1	0.777777778	0.875	0.957177081	0.042822919	0.680194805	0.959908362	0.796199525
243	1	0	1	1	1	0.777777778	0.222222222	1	0.777777778	0.875	0.957177081	0.042822919	0.680194805	0.959908362	0.796199525
243	1	0	1	1	1	0.777777778	0.222222222	1	0.777777778	0.875	0.957177081	0.042822919	0.680194805	0.959908362	0.796199525
243	1	0	1	1	1	0.777777778	0.222222222	1	0.777777778	0.875	0.957177081	0.042822919	0.680194805	0.959908362	0.796199525
243	1	0	1	1	1	0.777777778	0.222222222	1	0.777777778	0.875	0.957177081	0.042822919	0.680194805	0.959908362	0.796199525
243	1	0	1	1	1	0.777777778	0.222222222	1	0.777777778	0.875	0.957177081	0.042822919	0.680194805	0.959908362	0.796199525
243	1	0	1	1	1	0.777777778	0.222222222	1	0.777777778	0.875	0.957177081	0.042822919	0.680194805	0.959908362	0.796199525
243	1	0	1	1	1	0.777777778	0.222222222	1	0.777777778	0.875	0.957177081	0.042822919	0.680194805	0.959908362	0.796199525
243	1	0	1	1	1	0.777777778	0.222222222	1	0.777777778	0.875	0.957177081	0.042822919	0.680194805	0.959908362	0.796199525
243	1	0	1	1	1	0.777777778	0.222222222	1	0.777777778	0.875	0.957177081	0.042822919	0.680194805	0.959908362	0.796199525
243	1	0	1	1	1	0.777777778	0.222222222	1	0.777777778	0.875	0.957177081	0.042822919	0.680194805	0.959908362	0.796199525
243	1	0	1	1	1	0.777777778	0.222222222	1	0.777777778	0.875	0.957177081	0.042822919	0.680194805	0.959908362	0.796199525
243	1	0	1	1	1	0.777777778	0.222222222	1	0.777777778	0.875	0.957177081	0.042822919	0.680194805	0.959908362	0.796199525
243	1	0	1	1	1	0.777777778	0.222222222	1	0.777777778	0.875	0.957177081	0.042822919	0.680194805	0.959908362	0.796199525
243	1	0	1	1	1	0.777777778	0.222222222	1	0.777777778	0.875	0.957177081	0.042822919	0.680194805	0.959908362	0.796199525
243	1	0	1	1	1	0.777777778	0.222222222	1	0.777777778	0.875	0.957177081	0.042822919	0.680194805	0.959908362	0.796199525
243	1	0	1	1	1	0.777777778	0.222222222	1	0.777777778	0.875	0.957177081	0.042822919	0.680194805	0.959908362	0.796199525
243	1	0	1	1	1	0.777777778	0.222222222	1	0.777777778	0.875	0.957177081	0.042822919	0.680194805	0.959908362	0.796199525
243	1	0	1	1	1	0.777777778	0.222222222	1	0.777777778	0.875	0.957177081	0.042822919	0.680194805	0.959908362	0.796199525
243	1	0	1	1	1	0.777777778	0.222222222	1	0.777777778	0.875	0.957177081	0.042822919	0.680194805	0.959908362	0.796199525
243	1	0	1	1	1	0.777777778	0.222222222	1	0.777777778	0.875	0.957177081	0.042822919	0.680194805	0.959908362	0.796199525
243	1	0	1	1	1	0.777777778	0.222222222	1	0.777777778	0.875	0.957177081	0.042822919	0.680194805	0.959908362	0.796199525
243	1	0	1	1	1	0.777777778	0.222222222	1	0.777777778	0.875	0.957177081	0.042822919	0.680194805	0.959908362	0.796199525
243	1	0	1	1	1	0.777777778	0.222222222	1	0.777777778	0.875	0.957177081	0.042822919	0.680194805	0.959908362	0.796199525
243	1	0	1	1	1	0.777777778	0.222222222	1	0.777777778	0.875	0.957177081	0.042822919	0.680194805	0.959908362	0.796199525
243	1	0	1	1	1	0.777777778	0.222222222	1	0.777777778	0.875	0.957177081	0.042822919	0.680194805	0.959908362	0.796199525
243	1	0	1	1	1	0.777777778	0.222222222	1	0.777777778	0.875	0.957177081	0.042822919	0.680194805	0.959908362	0.796199525
243	1	0	1	1	1	0.777777778	0.222222222	1	0.777777778	0.875	0.957177081	0.042822919	0.680194805	0.959908362	0.796199525
243	1	0	1	1	1	0.777777778	0.222222222	1	0.777777778	0.875	0.957177081	0.042822919	0.680194805	0.959908362	0.796199525
243	1	0	1	1	1	0.777777778	0.222222222	1	0.777777778	0.875	0.957177081	0.042822919	0.680194805	0.959908362	0.796199525
243	1	0	1	1	1	0.777777778	0.222222222	1	0.777777778	0.875	0.957177081	0.042822919	0.680194805	0.959908362	0.796199525
243	1	0	1	1	1	0.777777778	0.222222222	1	0.777777778	0.875	0.957177081	0.042822919	0.680194805	0.959908362	0.796199525
243	1	0	1	1	1	0.777777778	0.222222222	1	0.777777778	0.875	0.957177081	0.042822919	0.680194805	0.959908362	0.796199525
243	1	0	1	1	1	0.777777778	0.222222222	1	0.777777778	0.875	0.957177081	0.042822919	0.680194805	0.959908362	0.796199525
243	1	0	1	1	1	0.777777778	0.222222222	1	0.777777778	0.875	0.957177081	0.042822919	0.680194805	0.959908362	0.796199525
243	1	0	1	1	1	0.777777778	0.222222222	1	0.777777778	0.875	0.957177081	0.042822919	0.680194805	0.959908362	0.796199525
243	1	0	1	1	1	0.777777778	0.222222222	1	0.777777778	0.875	0.957177081	0.042822919	0.680194805	0.959908362	0.796199525
243	1	0	1	1	1	0.777777778	0.222222222	1	0.777777778	0.875	0.957177081	0.042822919	0.680194805	0.959908362	0.796199525
243	1	0	1	1	1	0.777777778	0.222222222	1	0.777777778	0.875	0.957177081	0.042822919	0.680194805	0.959908362	0.796199525
243	1	0	1	1	1	0.777777778	0.222222222	1	0.777777778	0.875	0.957177081	0.042822919	0.680194805	0.959908362	0.796199525
243	1	0	1	1	1	0.777777778	0.222222222	1	0.777777778	0.875	0.957177081	0.042822919	0.680194805	0.959908362	0.796199525
243	1	0	1	1	1	0.777777778	0.222222222	1	0.777777778	0.875	0.957177081	0.042822919	0.680194805	0.959908362	0.796199525
243	1	0	1	1	1	0.777777778	0.222222222	1	0.777777778	0.875	0.957177081	0.042822919	0.680194805	0.959908362	0.796199525
243	1	0	1	1	1	0.777777778	0.222222222	1	0.777777778	0.875	0.957177081	0.042822919	0.680194805	0.959908362	0.796199525
243	1	0	1	1	1	0.777777778	0.222222222	1	0.777777778	0.875	0.957177081	0.042822919	0.680194805	0.959908362	0.796199525
243	1	0	1	1	1	0.777777778	0.222222222	1	0.777777778	0.875	0.957177081	0.042822919	0.680194805	0.959908362	0.796199525
243	1	0	1	1	1	0.777777778	0.222222222	1	0.777777778	0.875	0.957177081	0.042822919	0.680194805	0.959908362	0.796199525
243	1	0	1	1	1	0.777777778	0.222222222	1	0.777777778	0.875	0.957177081	0.042822919	0.680194805	0.959908362	0.796199525
243	1	0	1	1	1	0.777777778	0.222222222	1	0.777777778	0.875	0.957177081	0.042822919	0.680194805	0.959908362	0.796199525
243	1	0	1	1	1	0.777777778	0.222222222	1	0.777777778	0.875	0.957177081	0.042822919	0.680194805	0.959908362	0.796199525
243	1	0	1	1	1	0.777777778	0.222222222	1	0.777777778	0.875	0.957177081	0.042822919	0.680194805	0.959908362	0.796199525
243	1	0	1	1	1	0.777777778	0.222222222	1	0.777777778	0.875	0.957177081	0.042822919	0.680194805	0.959908362	0.796199525
243	1	0	1	1	1	0.777777778	0.222222222	1	0.777777778	0.875	0.957177081	0.042822919	0.680194805	0.959908362	0.796199525
243	1	0	1	1	1	0.777777778	0.222222222	1	0.777777778	0.875	0.957177081	0.042822919	0.680194805	0.959908362	0.796199525
243	1	0	1	1	1	0.777777778	0.222222222	1	0.777777778	0.875	0.957177081	0.042822919	0.680194805	0.959908362	0.796199525
243	1	0	1	1	1	0.777777778	0.222222222	1	0.777777778	0.875	0.957177081	0.042822919	0.680194805	0.959908362	0.796199525
243	1	0	1	1	1	0.777777778	0.222222222	1	0.777777778	0.875	0.957177081	0.042822919	0.680194805	0.959908362	0.796199525
243	1	0	1	1	1	0.777777778	0.222222222	1	0.777777778	0.875	0.957177081	0.042822919	0.680194805	0.959908362	0.796199525
243	1	0	1	1	1	0.777777778	0.222222222	1	0.777777778	0.875	0.957177081	0.042822919	0.680194805	0.959908362	0.796199525
243	1	0	1	1	1	0.777777778	0.222222222	1	0.777777778	0.875	0.957177081	0.042822919	0.680194805	0.959908362	0.796199525
243	1	0	1	1	1	0.777777778	0.222222222	1	0.777777778	0.875	0.957177081	0.042822919	0.680194805	0.959908362	0.796199525
243	1	0	1	1	1	0.777777778	0.222222222	1	0.777777778	0.875	0.957177081	0.042822919	0.680194805	0.959908362	0.796199525
243	1	0	1	1	1	0.777777778	0.222222222	1	0.777777778	0.875	0.957177081	0.042822919	0.680194805	0.959908362	0.796199525
243	1	0	1	1	1	0.777777778	0.222222222	1	0.777777778	0.875	0.957177081	0.042822919	0.680194805	0.959908362	0.796199525
243	1	0	1	1	1	0.777777778	0.222222222	1	0.777777778	0.875	0.957177081	0.042822919	0.680194805	0.959908362	0.796199525
243	1	0	1	1	1	0.777777778	0.222222222	1	0.777777778	0.875	0.957177081	0.042822919	0.680194805	0.959908362	0.796199525
243	1	0	1	1	1	0.777777778	0.222222222	1	0.777777778	0.875	0.957177081	0.042822919	0.680194805	0.959908362	0.796199525
243	1	0	1	1	1	0.777777778	0.222222222	1	0.777777778	0.875	0.957177081	0.042822919	0.680194805	0.959908362	0.796199525
243	1	0	1	1	1	0.777777778	0.222222222	1	0.777777778	0.875	0.957177081	0.042822919	0.680194805	0.959908362	0.796199525
243	1	0	1	1	1	0.777777778	0.222222222	1	0.777777778	0.875	0.957177081	0.042822919	0.680194805	0.959908362	0.796199525
243	1	0	1	1	1	0.777777778	0.222222222	1	0.777777778	0.875	0.957177081	0.042822919	0.680194805	0.959908362	0.796199525
243	1	0	1	1	1	0.777777778	0.222222222	1	0.777777778	0.875	0.957177081	0.042822919	0.680194805	0.959908362	0.796199525
243	1	0	1	1	1	0.777777778	0.222222222	1	0.777777778	0.875	0.957177081	0.042822919	0.680194805	0.959908362	0.796199525
243	1	0	1	1	1	0.777777778	0.222222222	1	0.777777778	0.875	0.957177081	0.042822919	0.680194805	0.959908362	0.796199525
243	1	0	1	1	1	0.777777778	0.222222222	1	0.777777778	0.875	0.957177081	0.042822919	0.680194805	0.959908362	0.796199525
243	1	0	1	1	1	0.777777778	0.222222222	1	0.777777778	0.875	0.957177081	0.042822919	0.680194805	0.959908362	0.796199525
243	1	0	1	1	1	0.777777778	0.222222222	1	0.777777778	0.875	0.957177081	0.042822919	0.680194805	0.959908362	0.796199525
243	1	0	1	1	1	0.777777778	0.222222222	1	0.777777778	0.875	0.957177081	0.042822919	0.680194805	0.959908362	0.796199525
243	1	0	1	1	1	0.777777778	0.222222222	1	0.777777778	0.875	0.957177081	0.042822919	0.680194805	0.959908362	0.796199525
243	1	0	1	1	1	0.777777778	0.222222222	1	0.777777778	0.875	0.957177081	0.042822919	0.680194805	0.959908362	0.796199525
243	1	0	1	1	1	0.777777778	0.222222222	1	0.777777778	0.875	0.957177081	0.042822919	0.680194805	0.959908362	0.796199525
243	1	0	1	1	1	0.777777778	0.222222222	1	0.777777778	0.875	0.957177081	0.042822919	0.680194805	0.959908362	0.796199525
243	1	0	1	1	1	0.777777778	0.222222222	1	0.777777778	0.875	0.957177081	0.042822919	0.680194805	0.959908362	0.796199525
243	1	0	1	1	1	0.777777778	0.222222222	1	0.777777778	0.875	0.957177081	0.042822919	0.680194805	0.959908362	0.796199525
243	1	0	1	1	1	0.777777778	0.222222222	1	0.777777778	0.875	0.957177081	0.042822919	0.680194805	0.959908362	0.796199525
243	1	0	1	1	1	0.777777778	0.222222222	1	0.777777778	0.875	0.957177081	0.042822919	0.680194805	0.959908362	0.796199525
243	1	0	1	1	1	0.777777778	0.222222222	1	0.777777778	0.875	0.957177081	0.042822919	0.680194805	0.959908362	0.796199525
243	1	0	1	1	1	0.777777778	0.222222222	1	0.777777778	0.875	0.957177081	0.042822919	0.680194805	0.959908362	0.796199525
