# Supplementary material for: An Improved Hybrid Feature Selection Algorithm for Electric Charge Recovery Risk
Source: Hindawi journal article supplement (doi:10.1155/2020/8479341), 2020-08-28
Supplement: f1 [file 8479341.f1.zip › 8479341.f1/Experimental Results/201806/CBPSO_results.csv]

features_num	Accuracy_high	Loss_high	Precission_high	Recall_high	F1_high	Accuracy_med	Loss_med	Precission_med	Recall_med	F1_med	Accuracy_low	Loss_low	Precission_low	Recall_low	F1_low
369	1.0	0.0	1.0	1.0	1.0	0.6937984496124031	0.3062015503875969	0.8052256532066508	0.8168674698795181	0.8110047846889954	0.897002997002997	0.10299700299700298	0.4758004467609829	0.6614906832298136	0.5534863577306193
369	1.0	0.0	1.0	1.0	1.0	0.6937984496124031	0.3062015503875969	0.8052256532066508	0.8168674698795181	0.8110047846889954	0.897002997002997	0.10299700299700298	0.4758004467609829	0.6614906832298136	0.5534863577306193
373	1.0	0.0	1.0	1.0	1.0	0.8012820512820513	0.19871794871794868	0.9021084337349398	0.8693759071117562	0.885439763488544	0.9283732401603124	0.07162675983968758	0.4914236706689537	0.8463810930576071	0.6218122626153011
373	1.0	0.0	1.0	1.0	1.0	0.8012820512820513	0.19871794871794868	0.9021084337349398	0.8693759071117562	0.885439763488544	0.9283732401603124	0.07162675983968758	0.4914236706689537	0.8463810930576071	0.6218122626153011
373	1.0	0.0	1.0	1.0	1.0	0.8012820512820513	0.19871794871794868	0.9021084337349398	0.8693759071117562	0.885439763488544	0.9283732401603124	0.07162675983968758	0.4914236706689537	0.8463810930576071	0.6218122626153011
373	1.0	0.0	1.0	1.0	1.0	0.8012820512820513	0.19871794871794868	0.9021084337349398	0.8693759071117562	0.885439763488544	0.9283732401603124	0.07162675983968758	0.4914236706689537	0.8463810930576071	0.6218122626153011
373	1.0	0.0	1.0	1.0	1.0	0.8012820512820513	0.19871794871794868	0.9021084337349398	0.8693759071117562	0.885439763488544	0.9283732401603124	0.07162675983968758	0.4914236706689537	0.8463810930576071	0.6218122626153011
373	1.0	0.0	1.0	1.0	1.0	0.8012820512820513	0.19871794871794868	0.9021084337349398	0.8693759071117562	0.885439763488544	0.9283732401603124	0.07162675983968758	0.4914236706689537	0.8463810930576071	0.6218122626153011
373	1.0	0.0	1.0	1.0	1.0	0.8012820512820513	0.19871794871794868	0.9021084337349398	0.8693759071117562	0.885439763488544	0.9283732401603124	0.07162675983968758	0.4914236706689537	0.8463810930576071	0.6218122626153011
373	1.0	0.0	1.0	1.0	1.0	0.8012820512820513	0.19871794871794868	0.9021084337349398	0.8693759071117562	0.885439763488544	0.9283732401603124	0.07162675983968758	0.4914236706689537	0.8463810930576071	0.6218122626153011
373	1.0	0.0	1.0	1.0	1.0	0.8012820512820513	0.19871794871794868	0.9021084337349398	0.8693759071117562	0.885439763488544	0.9283732401603124	0.07162675983968758	0.4914236706689537	0.8463810930576071	0.6218122626153011
373	1.0	0.0	1.0	1.0	1.0	0.8012820512820513	0.19871794871794868	0.9021084337349398	0.8693759071117562	0.885439763488544	0.9283732401603124	0.07162675983968758	0.4914236706689537	0.8463810930576071	0.6218122626153011
373	1.0	0.0	1.0	1.0	1.0	0.8012820512820513	0.19871794871794868	0.9021084337349398	0.8693759071117562	0.885439763488544	0.9283732401603124	0.07162675983968758	0.4914236706689537	0.8463810930576071	0.6218122626153011
373	1.0	0.0	1.0	1.0	1.0	0.8012820512820513	0.19871794871794868	0.9021084337349398	0.8693759071117562	0.885439763488544	0.9283732401603124	0.07162675983968758	0.4914236706689537	0.8463810930576071	0.6218122626153011
373	1.0	0.0	1.0	1.0	1.0	0.8012820512820513	0.19871794871794868	0.9021084337349398	0.8693759071117562	0.885439763488544	0.9283732401603124	0.07162675983968758	0.4914236706689537	0.8463810930576071	0.6218122626153011
373	1.0	0.0	1.0	1.0	1.0	0.8012820512820513	0.19871794871794868	0.9021084337349398	0.8693759071117562	0.885439763488544	0.9283732401603124	0.07162675983968758	0.4914236706689537	0.8463810930576071	0.6218122626153011
373	1.0	0.0	1.0	1.0	1.0	0.8012820512820513	0.19871794871794868	0.9021084337349398	0.8693759071117562	0.885439763488544	0.9283732401603124	0.07162675983968758	0.4914236706689537	0.8463810930576071	0.6218122626153011
373	1.0	0.0	1.0	1.0	1.0	0.8012820512820513	0.19871794871794868	0.9021084337349398	0.8693759071117562	0.885439763488544	0.9283732401603124	0.07162675983968758	0.4914236706689537	0.8463810930576071	0.6218122626153011
373	1.0	0.0	1.0	1.0	1.0	0.8012820512820513	0.19871794871794868	0.9021084337349398	0.8693759071117562	0.885439763488544	0.9283732401603124	0.07162675983968758	0.4914236706689537	0.8463810930576071	0.6218122626153011
373	1.0	0.0	1.0	1.0	1.0	0.8012820512820513	0.19871794871794868	0.9021084337349398	0.8693759071117562	0.885439763488544	0.9283732401603124	0.07162675983968758	0.4914236706689537	0.8463810930576071	0.6218122626153011
373	1.0	0.0	1.0	1.0	1.0	0.8012820512820513	0.19871794871794868	0.9021084337349398	0.8693759071117562	0.885439763488544	0.9283732401603124	0.07162675983968758	0.4914236706689537	0.8463810930576071	0.6218122626153011
373	1.0	0.0	1.0	1.0	1.0	0.8012820512820513	0.19871794871794868	0.9021084337349398	0.8693759071117562	0.885439763488544	0.9283732401603124	0.07162675983968758	0.4914236706689537	0.8463810930576071	0.6218122626153011
373	1.0	0.0	1.0	1.0	1.0	0.8012820512820513	0.19871794871794868	0.9021084337349398	0.8693759071117562	0.885439763488544	0.9283732401603124	0.07162675983968758	0.4914236706689537	0.8463810930576071	0.6218122626153011
373	1.0	0.0	1.0	1.0	1.0	0.8012820512820513	0.19871794871794868	0.9021084337349398	0.8693759071117562	0.885439763488544	0.9283732401603124	0.07162675983968758	0.4914236706689537	0.8463810930576071	0.6218122626153011
373	1.0	0.0	1.0	1.0	1.0	0.8012820512820513	0.19871794871794868	0.9021084337349398	0.8693759071117562	0.885439763488544	0.9283732401603124	0.07162675983968758	0.4914236706689537	0.8463810930576071	0.6218122626153011
373	1.0	0.0	1.0	1.0	1.0	0.8012820512820513	0.19871794871794868	0.9021084337349398	0.8693759071117562	0.885439763488544	0.9283732401603124	0.07162675983968758	0.4914236706689537	0.8463810930576071	0.6218122626153011
373	1.0	0.0	1.0	1.0	1.0	0.8012820512820513	0.19871794871794868	0.9021084337349398	0.8693759071117562	0.885439763488544	0.9283732401603124	0.07162675983968758	0.4914236706689537	0.8463810930576071	0.6218122626153011
373	1.0	0.0	1.0	1.0	1.0	0.8012820512820513	0.19871794871794868	0.9021084337349398	0.8693759071117562	0.885439763488544	0.9283732401603124	0.07162675983968758	0.4914236706689537	0.8463810930576071	0.6218122626153011
373	1.0	0.0	1.0	1.0	1.0	0.8012820512820513	0.19871794871794868	0.9021084337349398	0.8693759071117562	0.885439763488544	0.9283732401603124	0.07162675983968758	0.4914236706689537	0.8463810930576071	0.6218122626153011
373	1.0	0.0	1.0	1.0	1.0	0.8012820512820513	0.19871794871794868	0.9021084337349398	0.8693759071117562	0.885439763488544	0.9283732401603124	0.07162675983968758	0.4914236706689537	0.8463810930576071	0.6218122626153011
373	1.0	0.0	1.0	1.0	1.0	0.8012820512820513	0.19871794871794868	0.9021084337349398	0.8693759071117562	0.885439763488544	0.9283732401603124	0.07162675983968758	0.4914236706689537	0.8463810930576071	0.6218122626153011
373	1.0	0.0	1.0	1.0	1.0	0.8012820512820513	0.19871794871794868	0.9021084337349398	0.8693759071117562	0.885439763488544	0.9283732401603124	0.07162675983968758	0.4914236706689537	0.8463810930576071	0.6218122626153011
373	1.0	0.0	1.0	1.0	1.0	0.8012820512820513	0.19871794871794868	0.9021084337349398	0.8693759071117562	0.885439763488544	0.9283732401603124	0.07162675983968758	0.4914236706689537	0.8463810930576071	0.6218122626153011
373	1.0	0.0	1.0	1.0	1.0	0.8012820512820513	0.19871794871794868	0.9021084337349398	0.8693759071117562	0.885439763488544	0.9283732401603124	0.07162675983968758	0.4914236706689537	0.8463810930576071	0.6218122626153011
380	1.0	0.0	1.0	1.0	1.0	0.8320839580209896	0.16791604197901044	0.9890710382513661	0.8366718027734977	0.9065108514190318	0.9243391066545124	0.07566089334548765	0.49961449498843485	0.868632707774799	0.6343612334801763
380	1.0	0.0	1.0	1.0	1.0	0.8320839580209896	0.16791604197901044	0.9890710382513661	0.8366718027734977	0.9065108514190318	0.9243391066545124	0.07566089334548765	0.49961449498843485	0.868632707774799	0.6343612334801763
380	1.0	0.0	1.0	1.0	1.0	0.8320839580209896	0.16791604197901044	0.9890710382513661	0.8366718027734977	0.9065108514190318	0.9243391066545124	0.07566089334548765	0.49961449498843485	0.868632707774799	0.6343612334801763
380	1.0	0.0	1.0	1.0	1.0	0.8320839580209896	0.16791604197901044	0.9890710382513661	0.8366718027734977	0.9065108514190318	0.9243391066545124	0.07566089334548765	0.49961449498843485	0.868632707774799	0.6343612334801763
380	1.0	0.0	1.0	1.0	1.0	0.8320839580209896	0.16791604197901044	0.9890710382513661	0.8366718027734977	0.9065108514190318	0.9243391066545124	0.07566089334548765	0.49961449498843485	0.868632707774799	0.6343612334801763
380	1.0	0.0	1.0	1.0	1.0	0.8320839580209896	0.16791604197901044	0.9890710382513661	0.8366718027734977	0.9065108514190318	0.9243391066545124	0.07566089334548765	0.49961449498843485	0.868632707774799	0.6343612334801763
380	1.0	0.0	1.0	1.0	1.0	0.8320839580209896	0.16791604197901044	0.9890710382513661	0.8366718027734977	0.9065108514190318	0.9243391066545124	0.07566089334548765	0.49961449498843485	0.868632707774799	0.6343612334801763
380	1.0	0.0	1.0	1.0	1.0	0.8320839580209896	0.16791604197901044	0.9890710382513661	0.8366718027734977	0.9065108514190318	0.9243391066545124	0.07566089334548765	0.49961449498843485	0.868632707774799	0.6343612334801763
380	1.0	0.0	1.0	1.0	1.0	0.8320839580209896	0.16791604197901044	0.9890710382513661	0.8366718027734977	0.9065108514190318	0.9243391066545124	0.07566089334548765	0.49961449498843485	0.868632707774799	0.6343612334801763
380	1.0	0.0	1.0	1.0	1.0	0.8320839580209896	0.16791604197901044	0.9890710382513661	0.8366718027734977	0.9065108514190318	0.9243391066545124	0.07566089334548765	0.49961449498843485	0.868632707774799	0.6343612334801763
380	1.0	0.0	1.0	1.0	1.0	0.8320839580209896	0.16791604197901044	0.9890710382513661	0.8366718027734977	0.9065108514190318	0.9243391066545124	0.07566089334548765	0.49961449498843485	0.868632707774799	0.6343612334801763
380	1.0	0.0	1.0	1.0	1.0	0.8320839580209896	0.16791604197901044	0.9890710382513661	0.8366718027734977	0.9065108514190318	0.9243391066545124	0.07566089334548765	0.49961449498843485	0.868632707774799	0.6343612334801763
380	1.0	0.0	1.0	1.0	1.0	0.8320839580209896	0.16791604197901044	0.9890710382513661	0.8366718027734977	0.9065108514190318	0.9243391066545124	0.07566089334548765	0.49961449498843485	0.868632707774799	0.6343612334801763
380	1.0	0.0	1.0	1.0	1.0	0.8320839580209896	0.16791604197901044	0.9890710382513661	0.8366718027734977	0.9065108514190318	0.9243391066545124	0.07566089334548765	0.49961449498843485	0.868632707774799	0.6343612334801763
380	1.0	0.0	1.0	1.0	1.0	0.8320839580209896	0.16791604197901044	0.9890710382513661	0.8366718027734977	0.9065108514190318	0.9243391066545124	0.07566089334548765	0.49961449498843485	0.868632707774799	0.6343612334801763
380	1.0	0.0	1.0	1.0	1.0	0.8320839580209896	0.16791604197901044	0.9890710382513661	0.8366718027734977	0.9065108514190318	0.9243391066545124	0.07566089334548765	0.49961449498843485	0.868632707774799	0.6343612334801763
380	1.0	0.0	1.0	1.0	1.0	0.8320839580209896	0.16791604197901044	0.9890710382513661	0.8366718027734977	0.9065108514190318	0.9243391066545124	0.07566089334548765	0.49961449498843485	0.868632707774799	0.6343612334801763
380	1.0	0.0	1.0	1.0	1.0	0.8320839580209896	0.16791604197901044	0.9890710382513661	0.8366718027734977	0.9065108514190318	0.9243391066545124	0.07566089334548765	0.49961449498843485	0.868632707774799	0.6343612334801763
380	1.0	0.0	1.0	1.0	1.0	0.8320839580209896	0.16791604197901044	0.9890710382513661	0.8366718027734977	0.9065108514190318	0.9243391066545124	0.07566089334548765	0.49961449498843485	0.868632707774799	0.6343612334801763
380	1.0	0.0	1.0	1.0	1.0	0.8320839580209896	0.16791604197901044	0.9890710382513661	0.8366718027734977	0.9065108514190318	0.9243391066545124	0.07566089334548765	0.49961449498843485	0.868632707774799	0.6343612334801763
380	1.0	0.0	1.0	1.0	1.0	0.8320839580209896	0.16791604197901044	0.9890710382513661	0.8366718027734977	0.9065108514190318	0.9243391066545124	0.07566089334548765	0.49961449498843485	0.868632707774799	0.6343612334801763
380	1.0	0.0	1.0	1.0	1.0	0.8320839580209896	0.16791604197901044	0.9890710382513661	0.8366718027734977	0.9065108514190318	0.9243391066545124	0.07566089334548765	0.49961449498843485	0.868632707774799	0.6343612334801763
380	1.0	0.0	1.0	1.0	1.0	0.8320839580209896	0.16791604197901044	0.9890710382513661	0.8366718027734977	0.9065108514190318	0.9243391066545124	0.07566089334548765	0.49961449498843485	0.868632707774799	0.6343612334801763
380	1.0	0.0	1.0	1.0	1.0	0.8320839580209896	0.16791604197901044	0.9890710382513661	0.8366718027734977	0.9065108514190318	0.9243391066545124	0.07566089334548765	0.49961449498843485	0.868632707774799	0.6343612334801763
380	1.0	0.0	1.0	1.0	1.0	0.8320839580209896	0.16791604197901044	0.9890710382513661	0.8366718027734977	0.9065108514190318	0.9243391066545124	0.07566089334548765	0.49961449498843485	0.868632707774799	0.6343612334801763
380	1.0	0.0	1.0	1.0	1.0	0.8320839580209896	0.16791604197901044	0.9890710382513661	0.8366718027734977	0.9065108514190318	0.9243391066545124	0.07566089334548765	0.49961449498843485	0.868632707774799	0.6343612334801763
380	1.0	0.0	1.0	1.0	1.0	0.8320839580209896	0.16791604197901044	0.9890710382513661	0.8366718027734977	0.9065108514190318	0.9243391066545124	0.07566089334548765	0.49961449498843485	0.868632707774799	0.6343612334801763
380	1.0	0.0	1.0	1.0	1.0	0.8320839580209896	0.16791604197901044	0.9890710382513661	0.8366718027734977	0.9065108514190318	0.9243391066545124	0.07566089334548765	0.49961449498843485	0.868632707774799	0.6343612334801763
380	1.0	0.0	1.0	1.0	1.0	0.8320839580209896	0.16791604197901044	0.9890710382513661	0.8366718027734977	0.9065108514190318	0.9243391066545124	0.07566089334548765	0.49961449498843485	0.868632707774799	0.6343612334801763
380	1.0	0.0	1.0	1.0	1.0	0.8320839580209896	0.16791604197901044	0.9890710382513661	0.8366718027734977	0.9065108514190318	0.9243391066545124	0.07566089334548765	0.49961449498843485	0.868632707774799	0.6343612334801763
380	1.0	0.0	1.0	1.0	1.0	0.8320839580209896	0.16791604197901044	0.9890710382513661	0.8366718027734977	0.9065108514190318	0.9243391066545124	0.07566089334548765	0.49961449498843485	0.868632707774799	0.6343612334801763
380	1.0	0.0	1.0	1.0	1.0	0.8320839580209896	0.16791604197901044	0.9890710382513661	0.8366718027734977	0.9065108514190318	0.9243391066545124	0.07566089334548765	0.49961449498843485	0.868632707774799	0.6343612334801763
380	1.0	0.0	1.0	1.0	1.0	0.8320839580209896	0.16791604197901044	0.9890710382513661	0.8366718027734977	0.9065108514190318	0.9243391066545124	0.07566089334548765	0.49961449498843485	0.868632707774799	0.6343612334801763
380	1.0	0.0	1.0	1.0	1.0	0.8320839580209896	0.16791604197901044	0.9890710382513661	0.8366718027734977	0.9065108514190318	0.9243391066545124	0.07566089334548765	0.49961449498843485	0.868632707774799	0.6343612334801763
380	1.0	0.0	1.0	1.0	1.0	0.8320839580209896	0.16791604197901044	0.9890710382513661	0.8366718027734977	0.9065108514190318	0.9243391066545124	0.07566089334548765	0.49961449498843485	0.868632707774799	0.6343612334801763
380	1.0	0.0	1.0	1.0	1.0	0.8320839580209896	0.16791604197901044	0.9890710382513661	0.8366718027734977	0.9065108514190318	0.9243391066545124	0.07566089334548765	0.49961449498843485	0.868632707774799	0.6343612334801763
380	1.0	0.0	1.0	1.0	1.0	0.8320839580209896	0.16791604197901044	0.9890710382513661	0.8366718027734977	0.9065108514190318	0.9243391066545124	0.07566089334548765	0.49961449498843485	0.868632707774799	0.6343612334801763
380	1.0	0.0	1.0	1.0	1.0	0.8320839580209896	0.16791604197901044	0.9890710382513661	0.8366718027734977	0.9065108514190318	0.9243391066545124	0.07566089334548765	0.49961449498843485	0.868632707774799	0.6343612334801763
380	1.0	0.0	1.0	1.0	1.0	0.8320839580209896	0.16791604197901044	0.9890710382513661	0.8366718027734977	0.9065108514190318	0.9243391066545124	0.07566089334548765	0.49961449498843485	0.868632707774799	0.6343612334801763
380	1.0	0.0	1.0	1.0	1.0	0.8320839580209896	0.16791604197901044	0.9890710382513661	0.8366718027734977	0.9065108514190318	0.9243391066545124	0.07566089334548765	0.49961449498843485	0.868632707774799	0.6343612334801763
380	1.0	0.0	1.0	1.0	1.0	0.8320839580209896	0.16791604197901044	0.9890710382513661	0.8366718027734977	0.9065108514190318	0.9243391066545124	0.07566089334548765	0.49961449498843485	0.868632707774799	0.6343612334801763
380	1.0	0.0	1.0	1.0	1.0	0.8320839580209896	0.16791604197901044	0.9890710382513661	0.8366718027734977	0.9065108514190318	0.9243391066545124	0.07566089334548765	0.49961449498843485	0.868632707774799	0.6343612334801763
380	1.0	0.0	1.0	1.0	1.0	0.8320839580209896	0.16791604197901044	0.9890710382513661	0.8366718027734977	0.9065108514190318	0.9243391066545124	0.07566089334548765	0.49961449498843485	0.868632707774799	0.6343612334801763
380	1.0	0.0	1.0	1.0	1.0	0.8320839580209896	0.16791604197901044	0.9890710382513661	0.8366718027734977	0.9065108514190318	0.9243391066545124	0.07566089334548765	0.49961449498843485	0.868632707774799	0.6343612334801763
380	1.0	0.0	1.0	1.0	1.0	0.8320839580209896	0.16791604197901044	0.9890710382513661	0.8366718027734977	0.9065108514190318	0.9243391066545124	0.07566089334548765	0.49961449498843485	0.868632707774799	0.6343612334801763
380	1.0	0.0	1.0	1.0	1.0	0.8320839580209896	0.16791604197901044	0.9890710382513661	0.8366718027734977	0.9065108514190318	0.9243391066545124	0.07566089334548765	0.49961449498843485	0.868632707774799	0.6343612334801763
380	1.0	0.0	1.0	1.0	1.0	0.8320839580209896	0.16791604197901044	0.9890710382513661	0.8366718027734977	0.9065108514190318	0.9243391066545124	0.07566089334548765	0.49961449498843485	0.868632707774799	0.6343612334801763
380	1.0	0.0	1.0	1.0	1.0	0.8320839580209896	0.16791604197901044	0.9890710382513661	0.8366718027734977	0.9065108514190318	0.9243391066545124	0.07566089334548765	0.49961449498843485	0.868632707774799	0.6343612334801763
380	1.0	0.0	1.0	1.0	1.0	0.8320839580209896	0.16791604197901044	0.9890710382513661	0.8366718027734977	0.9065108514190318	0.9243391066545124	0.07566089334548765	0.49961449498843485	0.868632707774799	0.6343612334801763
380	1.0	0.0	1.0	1.0	1.0	0.8320839580209896	0.16791604197901044	0.9890710382513661	0.8366718027734977	0.9065108514190318	0.9243391066545124	0.07566089334548765	0.49961449498843485	0.868632707774799	0.6343612334801763
380	1.0	0.0	1.0	1.0	1.0	0.8320839580209896	0.16791604197901044	0.9890710382513661	0.8366718027734977	0.9065108514190318	0.9243391066545124	0.07566089334548765	0.49961449498843485	0.868632707774799	0.6343612334801763
380	1.0	0.0	1.0	1.0	1.0	0.8320839580209896	0.16791604197901044	0.9890710382513661	0.8366718027734977	0.9065108514190318	0.9243391066545124	0.07566089334548765	0.49961449498843485	0.868632707774799	0.6343612334801763
380	1.0	0.0	1.0	1.0	1.0	0.8320839580209896	0.16791604197901044	0.9890710382513661	0.8366718027734977	0.9065108514190318	0.9243391066545124	0.07566089334548765	0.49961449498843485	0.868632707774799	0.6343612334801763
380	1.0	0.0	1.0	1.0	1.0	0.8320839580209896	0.16791604197901044	0.9890710382513661	0.8366718027734977	0.9065108514190318	0.9243391066545124	0.07566089334548765	0.49961449498843485	0.868632707774799	0.6343612334801763
380	1.0	0.0	1.0	1.0	1.0	0.8320839580209896	0.16791604197901044	0.9890710382513661	0.8366718027734977	0.9065108514190318	0.9243391066545124	0.07566089334548765	0.49961449498843485	0.868632707774799	0.6343612334801763
380	1.0	0.0	1.0	1.0	1.0	0.8320839580209896	0.16791604197901044	0.9890710382513661	0.8366718027734977	0.9065108514190318	0.9243391066545124	0.07566089334548765	0.49961449498843485	0.868632707774799	0.6343612334801763
380	1.0	0.0	1.0	1.0	1.0	0.8320839580209896	0.16791604197901044	0.9890710382513661	0.8366718027734977	0.9065108514190318	0.9243391066545124	0.07566089334548765	0.49961449498843485	0.868632707774799	0.6343612334801763
380	1.0	0.0	1.0	1.0	1.0	0.8320839580209896	0.16791604197901044	0.9890710382513661	0.8366718027734977	0.9065108514190318	0.9243391066545124	0.07566089334548765	0.49961449498843485	0.868632707774799	0.6343612334801763
380	1.0	0.0	1.0	1.0	1.0	0.8320839580209896	0.16791604197901044	0.9890710382513661	0.8366718027734977	0.9065108514190318	0.9243391066545124	0.07566089334548765	0.49961449498843485	0.868632707774799	0.6343612334801763
380	1.0	0.0	1.0	1.0	1.0	0.8320839580209896	0.16791604197901044	0.9890710382513661	0.8366718027734977	0.9065108514190318	0.9243391066545124	0.07566089334548765	0.49961449498843485	0.868632707774799	0.6343612334801763
380	1.0	0.0	1.0	1.0	1.0	0.8320839580209896	0.16791604197901044	0.9890710382513661	0.8366718027734977	0.9065108514190318	0.9243391066545124	0.07566089334548765	0.49961449498843485	0.868632707774799	0.6343612334801763
380	1.0	0.0	1.0	1.0	1.0	0.8320839580209896	0.16791604197901044	0.9890710382513661	0.8366718027734977	0.9065108514190318	0.9243391066545124	0.07566089334548765	0.49961449498843485	0.868632707774799	0.6343612334801763
380	1.0	0.0	1.0	1.0	1.0	0.8320839580209896	0.16791604197901044	0.9890710382513661	0.8366718027734977	0.9065108514190318	0.9243391066545124	0.07566089334548765	0.49961449498843485	0.868632707774799	0.6343612334801763
380	1.0	0.0	1.0	1.0	1.0	0.8320839580209896	0.16791604197901044	0.9890710382513661	0.8366718027734977	0.9065108514190318	0.9243391066545124	0.07566089334548765	0.49961449498843485	0.868632707774799	0.6343612334801763
380	1.0	0.0	1.0	1.0	1.0	0.8320839580209896	0.16791604197901044	0.9890710382513661	0.8366718027734977	0.9065108514190318	0.9243391066545124	0.07566089334548765	0.49961449498843485	0.868632707774799	0.6343612334801763
380	1.0	0.0	1.0	1.0	1.0	0.8320839580209896	0.16791604197901044	0.9890710382513661	0.8366718027734977	0.9065108514190318	0.9243391066545124	0.07566089334548765	0.49961449498843485	0.868632707774799	0.6343612334801763
