# Supplementary material for: An Improved Hybrid Feature Selection Algorithm for Electric Charge Recovery Risk
Source: Hindawi journal article supplement (doi:10.1155/2020/8479341), 2020-08-28
Supplement: f1 [file 8479341.f1.zip › 8479341.f1/Experimental Results/201806/CBPSO_SBS_results.csv]

features_num	Accuracy_high	Loss_high	Precission_high	Recall_high	F1_high	Accuracy_med	Loss_med	Precission_med	Recall_med	F1_med	Accuracy_low	Loss_low	Precission_low	Recall_low	F1_low
380	1	0	1	1	1	0.834532374	0.165467626	0.985815603	0.838612368	0.906275469	0.922905028	0.077094972	0.489655172	0.87295082	0.627393225
379	1	0	1	1	1	0.833827893	0.166172107	0.985611511	0.840490798	0.907284768	0.924589499	0.075410501	0.499612102	0.866756393	0.633858268
379	1	0	1	1	1	0.833827893	0.166172107	0.985611511	0.840490798	0.907284768	0.924589499	0.075410501	0.499612102	0.866756393	0.633858268
378	1	0	1	1	1	0.834553441	0.165446559	0.985637343	0.839449541	0.906688687	0.92512935	0.07487065	0.50117096	0.866396761	0.635014837
377	1	0	1	1	1	0.832083958	0.167916042	0.985428051	0.83875969	0.906197655	0.925858402	0.074141598	0.507009346	0.868	0.640117994
377	1	0	1	1	1	0.832083958	0.167916042	0.985428051	0.83875969	0.906197655	0.925858402	0.074141598	0.507009346	0.868	0.640117994
377	1	0	1	1	1	0.832083958	0.167916042	0.985428051	0.83875969	0.906197655	0.925858402	0.074141598	0.507009346	0.868	0.640117994
377	1	0	1	1	1	0.832083958	0.167916042	0.985428051	0.83875969	0.906197655	0.925858402	0.074141598	0.507009346	0.868	0.640117994
377	1	0	1	1	1	0.832083958	0.167916042	0.985428051	0.83875969	0.906197655	0.925858402	0.074141598	0.507009346	0.868	0.640117994
376	1	0	1	1	1	0.835082459	0.164917541	0.987249545	0.840310078	0.907872697	0.925554543	0.074445457	0.505818464	0.869333333	0.639529181
376	1	0	1	1	1	0.835082459	0.164917541	0.987249545	0.840310078	0.907872697	0.925554543	0.074445457	0.505818464	0.869333333	0.639529181
376	1	0	1	1	1	0.835082459	0.164917541	0.987249545	0.840310078	0.907872697	0.925554543	0.074445457	0.505818464	0.869333333	0.639529181
376	1	0	1	1	1	0.835082459	0.164917541	0.987249545	0.840310078	0.907872697	0.925554543	0.074445457	0.505818464	0.869333333	0.639529181
376	1	0	1	1	1	0.835082459	0.164917541	0.987249545	0.840310078	0.907872697	0.925554543	0.074445457	0.505818464	0.869333333	0.639529181
376	1	0	1	1	1	0.835082459	0.164917541	0.987249545	0.840310078	0.907872697	0.925554543	0.074445457	0.505818464	0.869333333	0.639529181
376	1	0	1	1	1	0.835082459	0.164917541	0.987249545	0.840310078	0.907872697	0.925554543	0.074445457	0.505818464	0.869333333	0.639529181
376	1	0	1	1	1	0.835082459	0.164917541	0.987249545	0.840310078	0.907872697	0.925554543	0.074445457	0.505818464	0.869333333	0.639529181
376	1	0	1	1	1	0.835082459	0.164917541	0.987249545	0.840310078	0.907872697	0.925554543	0.074445457	0.505818464	0.869333333	0.639529181
376	1	0	1	1	1	0.835082459	0.164917541	0.987249545	0.840310078	0.907872697	0.925554543	0.074445457	0.505818464	0.869333333	0.639529181
376	1	0	1	1	1	0.835082459	0.164917541	0.987249545	0.840310078	0.907872697	0.925554543	0.074445457	0.505818464	0.869333333	0.639529181
376	1	0	1	1	1	0.835082459	0.164917541	0.987249545	0.840310078	0.907872697	0.925554543	0.074445457	0.505818464	0.869333333	0.639529181
376	1	0	1	1	1	0.835082459	0.164917541	0.987249545	0.840310078	0.907872697	0.925554543	0.074445457	0.505818464	0.869333333	0.639529181
376	1	0	1	1	1	0.835082459	0.164917541	0.987249545	0.840310078	0.907872697	0.925554543	0.074445457	0.505818464	0.869333333	0.639529181
376	1	0	1	1	1	0.835082459	0.164917541	0.987249545	0.840310078	0.907872697	0.925554543	0.074445457	0.505818464	0.869333333	0.639529181
376	1	0	1	1	1	0.835082459	0.164917541	0.987249545	0.840310078	0.907872697	0.925554543	0.074445457	0.505818464	0.869333333	0.639529181
376	1	0	1	1	1	0.835082459	0.164917541	0.987249545	0.840310078	0.907872697	0.925554543	0.074445457	0.505818464	0.869333333	0.639529181
376	1	0	1	1	1	0.835082459	0.164917541	0.987249545	0.840310078	0.907872697	0.925554543	0.074445457	0.505818464	0.869333333	0.639529181
376	1	0	1	1	1	0.835082459	0.164917541	0.987249545	0.840310078	0.907872697	0.925554543	0.074445457	0.505818464	0.869333333	0.639529181
376	1	0	1	1	1	0.835082459	0.164917541	0.987249545	0.840310078	0.907872697	0.925554543	0.074445457	0.505818464	0.869333333	0.639529181
376	1	0	1	1	1	0.835082459	0.164917541	0.987249545	0.840310078	0.907872697	0.925554543	0.074445457	0.505818464	0.869333333	0.639529181
376	1	0	1	1	1	0.835082459	0.164917541	0.987249545	0.840310078	0.907872697	0.925554543	0.074445457	0.505818464	0.869333333	0.639529181
376	1	0	1	1	1	0.835082459	0.164917541	0.987249545	0.840310078	0.907872697	0.925554543	0.074445457	0.505818464	0.869333333	0.639529181
376	1	0	1	1	1	0.835082459	0.164917541	0.987249545	0.840310078	0.907872697	0.925554543	0.074445457	0.505818464	0.869333333	0.639529181
376	1	0	1	1	1	0.835082459	0.164917541	0.987249545	0.840310078	0.907872697	0.925554543	0.074445457	0.505818464	0.869333333	0.639529181
376	1	0	1	1	1	0.835082459	0.164917541	0.987249545	0.840310078	0.907872697	0.925554543	0.074445457	0.505818464	0.869333333	0.639529181
376	1	0	1	1	1	0.835082459	0.164917541	0.987249545	0.840310078	0.907872697	0.925554543	0.074445457	0.505818464	0.869333333	0.639529181
376	1	0	1	1	1	0.835082459	0.164917541	0.987249545	0.840310078	0.907872697	0.925554543	0.074445457	0.505818464	0.869333333	0.639529181
376	1	0	1	1	1	0.835082459	0.164917541	0.987249545	0.840310078	0.907872697	0.925554543	0.074445457	0.505818464	0.869333333	0.639529181
376	1	0	1	1	1	0.835082459	0.164917541	0.987249545	0.840310078	0.907872697	0.925554543	0.074445457	0.505818464	0.869333333	0.639529181
376	1	0	1	1	1	0.835082459	0.164917541	0.987249545	0.840310078	0.907872697	0.925554543	0.074445457	0.505818464	0.869333333	0.639529181
376	1	0	1	1	1	0.835082459	0.164917541	0.987249545	0.840310078	0.907872697	0.925554543	0.074445457	0.505818464	0.869333333	0.639529181
376	1	0	1	1	1	0.835082459	0.164917541	0.987249545	0.840310078	0.907872697	0.925554543	0.074445457	0.505818464	0.869333333	0.639529181
376	1	0	1	1	1	0.835082459	0.164917541	0.987249545	0.840310078	0.907872697	0.925554543	0.074445457	0.505818464	0.869333333	0.639529181
376	1	0	1	1	1	0.835082459	0.164917541	0.987249545	0.840310078	0.907872697	0.925554543	0.074445457	0.505818464	0.869333333	0.639529181
376	1	0	1	1	1	0.835082459	0.164917541	0.987249545	0.840310078	0.907872697	0.925554543	0.074445457	0.505818464	0.869333333	0.639529181
376	1	0	1	1	1	0.835082459	0.164917541	0.987249545	0.840310078	0.907872697	0.925554543	0.074445457	0.505818464	0.869333333	0.639529181
376	1	0	1	1	1	0.835082459	0.164917541	0.987249545	0.840310078	0.907872697	0.925554543	0.074445457	0.505818464	0.869333333	0.639529181
376	1	0	1	1	1	0.835082459	0.164917541	0.987249545	0.840310078	0.907872697	0.925554543	0.074445457	0.505818464	0.869333333	0.639529181
376	1	0	1	1	1	0.835082459	0.164917541	0.987249545	0.840310078	0.907872697	0.925554543	0.074445457	0.505818464	0.869333333	0.639529181
376	1	0	1	1	1	0.835082459	0.164917541	0.987249545	0.840310078	0.907872697	0.925554543	0.074445457	0.505818464	0.869333333	0.639529181
376	1	0	1	1	1	0.835082459	0.164917541	0.987249545	0.840310078	0.907872697	0.925554543	0.074445457	0.505818464	0.869333333	0.639529181
376	1	0	1	1	1	0.835082459	0.164917541	0.987249545	0.840310078	0.907872697	0.925554543	0.074445457	0.505818464	0.869333333	0.639529181
376	1	0	1	1	1	0.835082459	0.164917541	0.987249545	0.840310078	0.907872697	0.925554543	0.074445457	0.505818464	0.869333333	0.639529181
376	1	0	1	1	1	0.835082459	0.164917541	0.987249545	0.840310078	0.907872697	0.925554543	0.074445457	0.505818464	0.869333333	0.639529181
376	1	0	1	1	1	0.835082459	0.164917541	0.987249545	0.840310078	0.907872697	0.925554543	0.074445457	0.505818464	0.869333333	0.639529181
376	1	0	1	1	1	0.835082459	0.164917541	0.987249545	0.840310078	0.907872697	0.925554543	0.074445457	0.505818464	0.869333333	0.639529181
376	1	0	1	1	1	0.835082459	0.164917541	0.987249545	0.840310078	0.907872697	0.925554543	0.074445457	0.505818464	0.869333333	0.639529181
376	1	0	1	1	1	0.835082459	0.164917541	0.987249545	0.840310078	0.907872697	0.925554543	0.074445457	0.505818464	0.869333333	0.639529181
376	1	0	1	1	1	0.835082459	0.164917541	0.987249545	0.840310078	0.907872697	0.925554543	0.074445457	0.505818464	0.869333333	0.639529181
376	1	0	1	1	1	0.835082459	0.164917541	0.987249545	0.840310078	0.907872697	0.925554543	0.074445457	0.505818464	0.869333333	0.639529181
376	1	0	1	1	1	0.835082459	0.164917541	0.987249545	0.840310078	0.907872697	0.925554543	0.074445457	0.505818464	0.869333333	0.639529181
376	1	0	1	1	1	0.835082459	0.164917541	0.987249545	0.840310078	0.907872697	0.925554543	0.074445457	0.505818464	0.869333333	0.639529181
376	1	0	1	1	1	0.835082459	0.164917541	0.987249545	0.840310078	0.907872697	0.925554543	0.074445457	0.505818464	0.869333333	0.639529181
376	1	0	1	1	1	0.835082459	0.164917541	0.987249545	0.840310078	0.907872697	0.925554543	0.074445457	0.505818464	0.869333333	0.639529181
376	1	0	1	1	1	0.835082459	0.164917541	0.987249545	0.840310078	0.907872697	0.925554543	0.074445457	0.505818464	0.869333333	0.639529181
376	1	0	1	1	1	0.835082459	0.164917541	0.987249545	0.840310078	0.907872697	0.925554543	0.074445457	0.505818464	0.869333333	0.639529181
376	1	0	1	1	1	0.835082459	0.164917541	0.987249545	0.840310078	0.907872697	0.925554543	0.074445457	0.505818464	0.869333333	0.639529181
376	1	0	1	1	1	0.835082459	0.164917541	0.987249545	0.840310078	0.907872697	0.925554543	0.074445457	0.505818464	0.869333333	0.639529181
376	1	0	1	1	1	0.835082459	0.164917541	0.987249545	0.840310078	0.907872697	0.925554543	0.074445457	0.505818464	0.869333333	0.639529181
376	1	0	1	1	1	0.835082459	0.164917541	0.987249545	0.840310078	0.907872697	0.925554543	0.074445457	0.505818464	0.869333333	0.639529181
376	1	0	1	1	1	0.835082459	0.164917541	0.987249545	0.840310078	0.907872697	0.925554543	0.074445457	0.505818464	0.869333333	0.639529181
376	1	0	1	1	1	0.835082459	0.164917541	0.987249545	0.840310078	0.907872697	0.925554543	0.074445457	0.505818464	0.869333333	0.639529181
376	1	0	1	1	1	0.835082459	0.164917541	0.987249545	0.840310078	0.907872697	0.925554543	0.074445457	0.505818464	0.869333333	0.639529181
376	1	0	1	1	1	0.835082459	0.164917541	0.987249545	0.840310078	0.907872697	0.925554543	0.074445457	0.505818464	0.869333333	0.639529181
376	1	0	1	1	1	0.835082459	0.164917541	0.987249545	0.840310078	0.907872697	0.925554543	0.074445457	0.505818464	0.869333333	0.639529181
376	1	0	1	1	1	0.835082459	0.164917541	0.987249545	0.840310078	0.907872697	0.925554543	0.074445457	0.505818464	0.869333333	0.639529181
376	1	0	1	1	1	0.835082459	0.164917541	0.987249545	0.840310078	0.907872697	0.925554543	0.074445457	0.505818464	0.869333333	0.639529181
376	1	0	1	1	1	0.835082459	0.164917541	0.987249545	0.840310078	0.907872697	0.925554543	0.074445457	0.505818464	0.869333333	0.639529181
376	1	0	1	1	1	0.835082459	0.164917541	0.987249545	0.840310078	0.907872697	0.925554543	0.074445457	0.505818464	0.869333333	0.639529181
376	1	0	1	1	1	0.835082459	0.164917541	0.987249545	0.840310078	0.907872697	0.925554543	0.074445457	0.505818464	0.869333333	0.639529181
376	1	0	1	1	1	0.835082459	0.164917541	0.987249545	0.840310078	0.907872697	0.925554543	0.074445457	0.505818464	0.869333333	0.639529181
376	1	0	1	1	1	0.835082459	0.164917541	0.987249545	0.840310078	0.907872697	0.925554543	0.074445457	0.505818464	0.869333333	0.639529181
376	1	0	1	1	1	0.835082459	0.164917541	0.987249545	0.840310078	0.907872697	0.925554543	0.074445457	0.505818464	0.869333333	0.639529181
376	1	0	1	1	1	0.835082459	0.164917541	0.987249545	0.840310078	0.907872697	0.925554543	0.074445457	0.505818464	0.869333333	0.639529181
376	1	0	1	1	1	0.835082459	0.164917541	0.987249545	0.840310078	0.907872697	0.925554543	0.074445457	0.505818464	0.869333333	0.639529181
376	1	0	1	1	1	0.835082459	0.164917541	0.987249545	0.840310078	0.907872697	0.925554543	0.074445457	0.505818464	0.869333333	0.639529181
376	1	0	1	1	1	0.835082459	0.164917541	0.987249545	0.840310078	0.907872697	0.925554543	0.074445457	0.505818464	0.869333333	0.639529181
376	1	0	1	1	1	0.835082459	0.164917541	0.987249545	0.840310078	0.907872697	0.925554543	0.074445457	0.505818464	0.869333333	0.639529181
376	1	0	1	1	1	0.835082459	0.164917541	0.987249545	0.840310078	0.907872697	0.925554543	0.074445457	0.505818464	0.869333333	0.639529181
376	1	0	1	1	1	0.835082459	0.164917541	0.987249545	0.840310078	0.907872697	0.925554543	0.074445457	0.505818464	0.869333333	0.639529181
376	1	0	1	1	1	0.835082459	0.164917541	0.987249545	0.840310078	0.907872697	0.925554543	0.074445457	0.505818464	0.869333333	0.639529181
376	1	0	1	1	1	0.835082459	0.164917541	0.987249545	0.840310078	0.907872697	0.925554543	0.074445457	0.505818464	0.869333333	0.639529181
376	1	0	1	1	1	0.835082459	0.164917541	0.987249545	0.840310078	0.907872697	0.925554543	0.074445457	0.505818464	0.869333333	0.639529181
376	1	0	1	1	1	0.835082459	0.164917541	0.987249545	0.840310078	0.907872697	0.925554543	0.074445457	0.505818464	0.869333333	0.639529181
376	1	0	1	1	1	0.835082459	0.164917541	0.987249545	0.840310078	0.907872697	0.925554543	0.074445457	0.505818464	0.869333333	0.639529181
376	1	0	1	1	1	0.835082459	0.164917541	0.987249545	0.840310078	0.907872697	0.925554543	0.074445457	0.505818464	0.869333333	0.639529181
376	1	0	1	1	1	0.835082459	0.164917541	0.987249545	0.840310078	0.907872697	0.925554543	0.074445457	0.505818464	0.869333333	0.639529181
376	1	0	1	1	1	0.835082459	0.164917541	0.987249545	0.840310078	0.907872697	0.925554543	0.074445457	0.505818464	0.869333333	0.639529181
376	1	0	1	1	1	0.835082459	0.164917541	0.987249545	0.840310078	0.907872697	0.925554543	0.074445457	0.505818464	0.869333333	0.639529181
376	1	0	1	1	1	0.835082459	0.164917541	0.987249545	0.840310078	0.907872697	0.925554543	0.074445457	0.505818464	0.869333333	0.639529181
376	1	0	1	1	1	0.835082459	0.164917541	0.987249545	0.840310078	0.907872697	0.925554543	0.074445457	0.505818464	0.869333333	0.639529181
376	1	0	1	1	1	0.835082459	0.164917541	0.987249545	0.840310078	0.907872697	0.925554543	0.074445457	0.505818464	0.869333333	0.639529181
376	1	0	1	1	1	0.835082459	0.164917541	0.987249545	0.840310078	0.907872697	0.925554543	0.074445457	0.505818464	0.869333333	0.639529181
376	1	0	1	1	1	0.835082459	0.164917541	0.987249545	0.840310078	0.907872697	0.925554543	0.074445457	0.505818464	0.869333333	0.639529181
376	1	0	1	1	1	0.835082459	0.164917541	0.987249545	0.840310078	0.907872697	0.925554543	0.074445457	0.505818464	0.869333333	0.639529181
376	1	0	1	1	1	0.835082459	0.164917541	0.987249545	0.840310078	0.907872697	0.925554543	0.074445457	0.505818464	0.869333333	0.639529181
376	1	0	1	1	1	0.835082459	0.164917541	0.987249545	0.840310078	0.907872697	0.925554543	0.074445457	0.505818464	0.869333333	0.639529181
376	1	0	1	1	1	0.835082459	0.164917541	0.987249545	0.840310078	0.907872697	0.925554543	0.074445457	0.505818464	0.869333333	0.639529181
376	1	0	1	1	1	0.835082459	0.164917541	0.987249545	0.840310078	0.907872697	0.925554543	0.074445457	0.505818464	0.869333333	0.639529181
376	1	0	1	1	1	0.835082459	0.164917541	0.987249545	0.840310078	0.907872697	0.925554543	0.074445457	0.505818464	0.869333333	0.639529181
376	1	0	1	1	1	0.835082459	0.164917541	0.987249545	0.840310078	0.907872697	0.925554543	0.074445457	0.505818464	0.869333333	0.639529181
376	1	0	1	1	1	0.835082459	0.164917541	0.987249545	0.840310078	0.907872697	0.925554543	0.074445457	0.505818464	0.869333333	0.639529181
376	1	0	1	1	1	0.835082459	0.164917541	0.987249545	0.840310078	0.907872697	0.925554543	0.074445457	0.505818464	0.869333333	0.639529181
376	1	0	1	1	1	0.835082459	0.164917541	0.987249545	0.840310078	0.907872697	0.925554543	0.074445457	0.505818464	0.869333333	0.639529181
376	1	0	1	1	1	0.835082459	0.164917541	0.987249545	0.840310078	0.907872697	0.925554543	0.074445457	0.505818464	0.869333333	0.639529181
376	1	0	1	1	1	0.835082459	0.164917541	0.987249545	0.840310078	0.907872697	0.925554543	0.074445457	0.505818464	0.869333333	0.639529181
376	1	0	1	1	1	0.835082459	0.164917541	0.987249545	0.840310078	0.907872697	0.925554543	0.074445457	0.505818464	0.869333333	0.639529181
376	1	0	1	1	1	0.835082459	0.164917541	0.987249545	0.840310078	0.907872697	0.925554543	0.074445457	0.505818464	0.869333333	0.639529181
376	1	0	1	1	1	0.835082459	0.164917541	0.987249545	0.840310078	0.907872697	0.925554543	0.074445457	0.505818464	0.869333333	0.639529181
376	1	0	1	1	1	0.835082459	0.164917541	0.987249545	0.840310078	0.907872697	0.925554543	0.074445457	0.505818464	0.869333333	0.639529181
376	1	0	1	1	1	0.835082459	0.164917541	0.987249545	0.840310078	0.907872697	0.925554543	0.074445457	0.505818464	0.869333333	0.639529181
376	1	0	1	1	1	0.835082459	0.164917541	0.987249545	0.840310078	0.907872697	0.925554543	0.074445457	0.505818464	0.869333333	0.639529181
376	1	0	1	1	1	0.835082459	0.164917541	0.987249545	0.840310078	0.907872697	0.925554543	0.074445457	0.505818464	0.869333333	0.639529181
376	1	0	1	1	1	0.835082459	0.164917541	0.987249545	0.840310078	0.907872697	0.925554543	0.074445457	0.505818464	0.869333333	0.639529181
376	1	0	1	1	1	0.835082459	0.164917541	0.987249545	0.840310078	0.907872697	0.925554543	0.074445457	0.505818464	0.869333333	0.639529181
376	1	0	1	1	1	0.835082459	0.164917541	0.987249545	0.840310078	0.907872697	0.925554543	0.074445457	0.505818464	0.869333333	0.639529181
376	1	0	1	1	1	0.835082459	0.164917541	0.987249545	0.840310078	0.907872697	0.925554543	0.074445457	0.505818464	0.869333333	0.639529181
376	1	0	1	1	1	0.835082459	0.164917541	0.987249545	0.840310078	0.907872697	0.925554543	0.074445457	0.505818464	0.869333333	0.639529181
376	1	0	1	1	1	0.835082459	0.164917541	0.987249545	0.840310078	0.907872697	0.925554543	0.074445457	0.505818464	0.869333333	0.639529181
376	1	0	1	1	1	0.835082459	0.164917541	0.987249545	0.840310078	0.907872697	0.925554543	0.074445457	0.505818464	0.869333333	0.639529181
376	1	0	1	1	1	0.835082459	0.164917541	0.987249545	0.840310078	0.907872697	0.925554543	0.074445457	0.505818464	0.869333333	0.639529181
376	1	0	1	1	1	0.835082459	0.164917541	0.987249545	0.840310078	0.907872697	0.925554543	0.074445457	0.505818464	0.869333333	0.639529181
376	1	0	1	1	1	0.835082459	0.164917541	0.987249545	0.840310078	0.907872697	0.925554543	0.074445457	0.505818464	0.869333333	0.639529181
376	1	0	1	1	1	0.835082459	0.164917541	0.987249545	0.840310078	0.907872697	0.925554543	0.074445457	0.505818464	0.869333333	0.639529181
376	1	0	1	1	1	0.835082459	0.164917541	0.987249545	0.840310078	0.907872697	0.925554543	0.074445457	0.505818464	0.869333333	0.639529181
376	1	0	1	1	1	0.835082459	0.164917541	0.987249545	0.840310078	0.907872697	0.925554543	0.074445457	0.505818464	0.869333333	0.639529181
376	1	0	1	1	1	0.835082459	0.164917541	0.987249545	0.840310078	0.907872697	0.925554543	0.074445457	0.505818464	0.869333333	0.639529181
376	1	0	1	1	1	0.835082459	0.164917541	0.987249545	0.840310078	0.907872697	0.925554543	0.074445457	0.505818464	0.869333333	0.639529181
376	1	0	1	1	1	0.835082459	0.164917541	0.987249545	0.840310078	0.907872697	0.925554543	0.074445457	0.505818464	0.869333333	0.639529181
376	1	0	1	1	1	0.835082459	0.164917541	0.987249545	0.840310078	0.907872697	0.925554543	0.074445457	0.505818464	0.869333333	0.639529181
376	1	0	1	1	1	0.835082459	0.164917541	0.987249545	0.840310078	0.907872697	0.925554543	0.074445457	0.505818464	0.869333333	0.639529181
376	1	0	1	1	1	0.835082459	0.164917541	0.987249545	0.840310078	0.907872697	0.925554543	0.074445457	0.505818464	0.869333333	0.639529181
376	1	0	1	1	1	0.835082459	0.164917541	0.987249545	0.840310078	0.907872697	0.925554543	0.074445457	0.505818464	0.869333333	0.639529181
376	1	0	1	1	1	0.835082459	0.164917541	0.987249545	0.840310078	0.907872697	0.925554543	0.074445457	0.505818464	0.869333333	0.639529181
376	1	0	1	1	1	0.835082459	0.164917541	0.987249545	0.840310078	0.907872697	0.925554543	0.074445457	0.505818464	0.869333333	0.639529181
376	1	0	1	1	1	0.835082459	0.164917541	0.987249545	0.840310078	0.907872697	0.925554543	0.074445457	0.505818464	0.869333333	0.639529181
376	1	0	1	1	1	0.835082459	0.164917541	0.987249545	0.840310078	0.907872697	0.925554543	0.074445457	0.505818464	0.869333333	0.639529181
376	1	0	1	1	1	0.835082459	0.164917541	0.987249545	0.840310078	0.907872697	0.925554543	0.074445457	0.505818464	0.869333333	0.639529181
376	1	0	1	1	1	0.835082459	0.164917541	0.987249545	0.840310078	0.907872697	0.925554543	0.074445457	0.505818464	0.869333333	0.639529181
376	1	0	1	1	1	0.835082459	0.164917541	0.987249545	0.840310078	0.907872697	0.925554543	0.074445457	0.505818464	0.869333333	0.639529181
376	1	0	1	1	1	0.835082459	0.164917541	0.987249545	0.840310078	0.907872697	0.925554543	0.074445457	0.505818464	0.869333333	0.639529181
376	1	0	1	1	1	0.835082459	0.164917541	0.987249545	0.840310078	0.907872697	0.925554543	0.074445457	0.505818464	0.869333333	0.639529181
376	1	0	1	1	1	0.835082459	0.164917541	0.987249545	0.840310078	0.907872697	0.925554543	0.074445457	0.505818464	0.869333333	0.639529181
376	1	0	1	1	1	0.835082459	0.164917541	0.987249545	0.840310078	0.907872697	0.925554543	0.074445457	0.505818464	0.869333333	0.639529181
376	1	0	1	1	1	0.835082459	0.164917541	0.987249545	0.840310078	0.907872697	0.925554543	0.074445457	0.505818464	0.869333333	0.639529181
376	1	0	1	1	1	0.835082459	0.164917541	0.987249545	0.840310078	0.907872697	0.925554543	0.074445457	0.505818464	0.869333333	0.639529181
376	1	0	1	1	1	0.835082459	0.164917541	0.987249545	0.840310078	0.907872697	0.925554543	0.074445457	0.505818464	0.869333333	0.639529181
376	1	0	1	1	1	0.835082459	0.164917541	0.987249545	0.840310078	0.907872697	0.925554543	0.074445457	0.505818464	0.869333333	0.639529181
376	1	0	1	1	1	0.835082459	0.164917541	0.987249545	0.840310078	0.907872697	0.925554543	0.074445457	0.505818464	0.869333333	0.639529181
376	1	0	1	1	1	0.835082459	0.164917541	0.987249545	0.840310078	0.907872697	0.925554543	0.074445457	0.505818464	0.869333333	0.639529181
376	1	0	1	1	1	0.835082459	0.164917541	0.987249545	0.840310078	0.907872697	0.925554543	0.074445457	0.505818464	0.869333333	0.639529181
376	1	0	1	1	1	0.835082459	0.164917541	0.987249545	0.840310078	0.907872697	0.925554543	0.074445457	0.505818464	0.869333333	0.639529181
376	1	0	1	1	1	0.835082459	0.164917541	0.987249545	0.840310078	0.907872697	0.925554543	0.074445457	0.505818464	0.869333333	0.639529181
376	1	0	1	1	1	0.835082459	0.164917541	0.987249545	0.840310078	0.907872697	0.925554543	0.074445457	0.505818464	0.869333333	0.639529181
376	1	0	1	1	1	0.835082459	0.164917541	0.987249545	0.840310078	0.907872697	0.925554543	0.074445457	0.505818464	0.869333333	0.639529181
376	1	0	1	1	1	0.835082459	0.164917541	0.987249545	0.840310078	0.907872697	0.925554543	0.074445457	0.505818464	0.869333333	0.639529181
376	1	0	1	1	1	0.835082459	0.164917541	0.987249545	0.840310078	0.907872697	0.925554543	0.074445457	0.505818464	0.869333333	0.639529181
376	1	0	1	1	1	0.835082459	0.164917541	0.987249545	0.840310078	0.907872697	0.925554543	0.074445457	0.505818464	0.869333333	0.639529181
376	1	0	1	1	1	0.835082459	0.164917541	0.987249545	0.840310078	0.907872697	0.925554543	0.074445457	0.505818464	0.869333333	0.639529181
376	1	0	1	1	1	0.835082459	0.164917541	0.987249545	0.840310078	0.907872697	0.925554543	0.074445457	0.505818464	0.869333333	0.639529181
376	1	0	1	1	1	0.835082459	0.164917541	0.987249545	0.840310078	0.907872697	0.925554543	0.074445457	0.505818464	0.869333333	0.639529181
376	1	0	1	1	1	0.835082459	0.164917541	0.987249545	0.840310078	0.907872697	0.925554543	0.074445457	0.505818464	0.869333333	0.639529181
376	1	0	1	1	1	0.835082459	0.164917541	0.987249545	0.840310078	0.907872697	0.925554543	0.074445457	0.505818464	0.869333333	0.639529181
376	1	0	1	1	1	0.835082459	0.164917541	0.987249545	0.840310078	0.907872697	0.925554543	0.074445457	0.505818464	0.869333333	0.639529181
376	1	0	1	1	1	0.835082459	0.164917541	0.987249545	0.840310078	0.907872697	0.925554543	0.074445457	0.505818464	0.869333333	0.639529181
376	1	0	1	1	1	0.835082459	0.164917541	0.987249545	0.840310078	0.907872697	0.925554543	0.074445457	0.505818464	0.869333333	0.639529181
376	1	0	1	1	1	0.835082459	0.164917541	0.987249545	0.840310078	0.907872697	0.925554543	0.074445457	0.505818464	0.869333333	0.639529181
376	1	0	1	1	1	0.835082459	0.164917541	0.987249545	0.840310078	0.907872697	0.925554543	0.074445457	0.505818464	0.869333333	0.639529181
376	1	0	1	1	1	0.835082459	0.164917541	0.987249545	0.840310078	0.907872697	0.925554543	0.074445457	0.505818464	0.869333333	0.639529181
376	1	0	1	1	1	0.835082459	0.164917541	0.987249545	0.840310078	0.907872697	0.925554543	0.074445457	0.505818464	0.869333333	0.639529181
376	1	0	1	1	1	0.835082459	0.164917541	0.987249545	0.840310078	0.907872697	0.925554543	0.074445457	0.505818464	0.869333333	0.639529181
376	1	0	1	1	1	0.835082459	0.164917541	0.987249545	0.840310078	0.907872697	0.925554543	0.074445457	0.505818464	0.869333333	0.639529181
376	1	0	1	1	1	0.835082459	0.164917541	0.987249545	0.840310078	0.907872697	0.925554543	0.074445457	0.505818464	0.869333333	0.639529181
376	1	0	1	1	1	0.835082459	0.164917541	0.987249545	0.840310078	0.907872697	0.925554543	0.074445457	0.505818464	0.869333333	0.639529181
376	1	0	1	1	1	0.835082459	0.164917541	0.987249545	0.840310078	0.907872697	0.925554543	0.074445457	0.505818464	0.869333333	0.639529181
376	1	0	1	1	1	0.835082459	0.164917541	0.987249545	0.840310078	0.907872697	0.925554543	0.074445457	0.505818464	0.869333333	0.639529181
376	1	0	1	1	1	0.835082459	0.164917541	0.987249545	0.840310078	0.907872697	0.925554543	0.074445457	0.505818464	0.869333333	0.639529181
376	1	0	1	1	1	0.835082459	0.164917541	0.987249545	0.840310078	0.907872697	0.925554543	0.074445457	0.505818464	0.869333333	0.639529181
376	1	0	1	1	1	0.835082459	0.164917541	0.987249545	0.840310078	0.907872697	0.925554543	0.074445457	0.505818464	0.869333333	0.639529181
376	1	0	1	1	1	0.835082459	0.164917541	0.987249545	0.840310078	0.907872697	0.925554543	0.074445457	0.505818464	0.869333333	0.639529181
376	1	0	1	1	1	0.835082459	0.164917541	0.987249545	0.840310078	0.907872697	0.925554543	0.074445457	0.505818464	0.869333333	0.639529181
376	1	0	1	1	1	0.835082459	0.164917541	0.987249545	0.840310078	0.907872697	0.925554543	0.074445457	0.505818464	0.869333333	0.639529181
376	1	0	1	1	1	0.835082459	0.164917541	0.987249545	0.840310078	0.907872697	0.925554543	0.074445457	0.505818464	0.869333333	0.639529181
376	1	0	1	1	1	0.835082459	0.164917541	0.987249545	0.840310078	0.907872697	0.925554543	0.074445457	0.505818464	0.869333333	0.639529181
376	1	0	1	1	1	0.835082459	0.164917541	0.987249545	0.840310078	0.907872697	0.925554543	0.074445457	0.505818464	0.869333333	0.639529181
376	1	0	1	1	1	0.835082459	0.164917541	0.987249545	0.840310078	0.907872697	0.925554543	0.074445457	0.505818464	0.869333333	0.639529181
376	1	0	1	1	1	0.835082459	0.164917541	0.987249545	0.840310078	0.907872697	0.925554543	0.074445457	0.505818464	0.869333333	0.639529181
376	1	0	1	1	1	0.835082459	0.164917541	0.987249545	0.840310078	0.907872697	0.925554543	0.074445457	0.505818464	0.869333333	0.639529181
376	1	0	1	1	1	0.835082459	0.164917541	0.987249545	0.840310078	0.907872697	0.925554543	0.074445457	0.505818464	0.869333333	0.639529181
376	1	0	1	1	1	0.835082459	0.164917541	0.987249545	0.840310078	0.907872697	0.925554543	0.074445457	0.505818464	0.869333333	0.639529181
376	1	0	1	1	1	0.835082459	0.164917541	0.987249545	0.840310078	0.907872697	0.925554543	0.074445457	0.505818464	0.869333333	0.639529181
376	1	0	1	1	1	0.835082459	0.164917541	0.987249545	0.840310078	0.907872697	0.925554543	0.074445457	0.505818464	0.869333333	0.639529181
376	1	0	1	1	1	0.835082459	0.164917541	0.987249545	0.840310078	0.907872697	0.925554543	0.074445457	0.505818464	0.869333333	0.639529181
376	1	0	1	1	1	0.835082459	0.164917541	0.987249545	0.840310078	0.907872697	0.925554543	0.074445457	0.505818464	0.869333333	0.639529181
376	1	0	1	1	1	0.835082459	0.164917541	0.987249545	0.840310078	0.907872697	0.925554543	0.074445457	0.505818464	0.869333333	0.639529181
376	1	0	1	1	1	0.835082459	0.164917541	0.987249545	0.840310078	0.907872697	0.925554543	0.074445457	0.505818464	0.869333333	0.639529181
376	1	0	1	1	1	0.835082459	0.164917541	0.987249545	0.840310078	0.907872697	0.925554543	0.074445457	0.505818464	0.869333333	0.639529181
376	1	0	1	1	1	0.835082459	0.164917541	0.987249545	0.840310078	0.907872697	0.925554543	0.074445457	0.505818464	0.869333333	0.639529181
376	1	0	1	1	1	0.835082459	0.164917541	0.987249545	0.840310078	0.907872697	0.925554543	0.074445457	0.505818464	0.869333333	0.639529181
376	1	0	1	1	1	0.835082459	0.164917541	0.987249545	0.840310078	0.907872697	0.925554543	0.074445457	0.505818464	0.869333333	0.639529181
376	1	0	1	1	1	0.835082459	0.164917541	0.987249545	0.840310078	0.907872697	0.925554543	0.074445457	0.505818464	0.869333333	0.639529181
376	1	0	1	1	1	0.835082459	0.164917541	0.987249545	0.840310078	0.907872697	0.925554543	0.074445457	0.505818464	0.869333333	0.639529181
376	1	0	1	1	1	0.835082459	0.164917541	0.987249545	0.840310078	0.907872697	0.925554543	0.074445457	0.505818464	0.869333333	0.639529181
376	1	0	1	1	1	0.835082459	0.164917541	0.987249545	0.840310078	0.907872697	0.925554543	0.074445457	0.505818464	0.869333333	0.639529181
376	1	0	1	1	1	0.835082459	0.164917541	0.987249545	0.840310078	0.907872697	0.925554543	0.074445457	0.505818464	0.869333333	0.639529181
376	1	0	1	1	1	0.835082459	0.164917541	0.987249545	0.840310078	0.907872697	0.925554543	0.074445457	0.505818464	0.869333333	0.639529181
376	1	0	1	1	1	0.835082459	0.164917541	0.987249545	0.840310078	0.907872697	0.925554543	0.074445457	0.505818464	0.869333333	0.639529181
376	1	0	1	1	1	0.835082459	0.164917541	0.987249545	0.840310078	0.907872697	0.925554543	0.074445457	0.505818464	0.869333333	0.639529181
376	1	0	1	1	1	0.835082459	0.164917541	0.987249545	0.840310078	0.907872697	0.925554543	0.074445457	0.505818464	0.869333333	0.639529181
376	1	0	1	1	1	0.835082459	0.164917541	0.987249545	0.840310078	0.907872697	0.925554543	0.074445457	0.505818464	0.869333333	0.639529181
376	1	0	1	1	1	0.835082459	0.164917541	0.987249545	0.840310078	0.907872697	0.925554543	0.074445457	0.505818464	0.869333333	0.639529181
376	1	0	1	1	1	0.835082459	0.164917541	0.987249545	0.840310078	0.907872697	0.925554543	0.074445457	0.505818464	0.869333333	0.639529181
376	1	0	1	1	1	0.835082459	0.164917541	0.987249545	0.840310078	0.907872697	0.925554543	0.074445457	0.505818464	0.869333333	0.639529181
376	1	0	1	1	1	0.835082459	0.164917541	0.987249545	0.840310078	0.907872697	0.925554543	0.074445457	0.505818464	0.869333333	0.639529181
376	1	0	1	1	1	0.835082459	0.164917541	0.987249545	0.840310078	0.907872697	0.925554543	0.074445457	0.505818464	0.869333333	0.639529181
376	1	0	1	1	1	0.835082459	0.164917541	0.987249545	0.840310078	0.907872697	0.925554543	0.074445457	0.505818464	0.869333333	0.639529181
376	1	0	1	1	1	0.835082459	0.164917541	0.987249545	0.840310078	0.907872697	0.925554543	0.074445457	0.505818464	0.869333333	0.639529181
376	1	0	1	1	1	0.835082459	0.164917541	0.987249545	0.840310078	0.907872697	0.925554543	0.074445457	0.505818464	0.869333333	0.639529181
376	1	0	1	1	1	0.835082459	0.164917541	0.987249545	0.840310078	0.907872697	0.925554543	0.074445457	0.505818464	0.869333333	0.639529181
376	1	0	1	1	1	0.835082459	0.164917541	0.987249545	0.840310078	0.907872697	0.925554543	0.074445457	0.505818464	0.869333333	0.639529181
376	1	0	1	1	1	0.835082459	0.164917541	0.987249545	0.840310078	0.907872697	0.925554543	0.074445457	0.505818464	0.869333333	0.639529181
376	1	0	1	1	1	0.835082459	0.164917541	0.987249545	0.840310078	0.907872697	0.925554543	0.074445457	0.505818464	0.869333333	0.639529181
376	1	0	1	1	1	0.835082459	0.164917541	0.987249545	0.840310078	0.907872697	0.925554543	0.074445457	0.505818464	0.869333333	0.639529181
376	1	0	1	1	1	0.835082459	0.164917541	0.987249545	0.840310078	0.907872697	0.925554543	0.074445457	0.505818464	0.869333333	0.639529181
376	1	0	1	1	1	0.835082459	0.164917541	0.987249545	0.840310078	0.907872697	0.925554543	0.074445457	0.505818464	0.869333333	0.639529181
376	1	0	1	1	1	0.835082459	0.164917541	0.987249545	0.840310078	0.907872697	0.925554543	0.074445457	0.505818464	0.869333333	0.639529181
376	1	0	1	1	1	0.835082459	0.164917541	0.987249545	0.840310078	0.907872697	0.925554543	0.074445457	0.505818464	0.869333333	0.639529181
376	1	0	1	1	1	0.835082459	0.164917541	0.987249545	0.840310078	0.907872697	0.925554543	0.074445457	0.505818464	0.869333333	0.639529181
376	1	0	1	1	1	0.835082459	0.164917541	0.987249545	0.840310078	0.907872697	0.925554543	0.074445457	0.505818464	0.869333333	0.639529181
376	1	0	1	1	1	0.835082459	0.164917541	0.987249545	0.840310078	0.907872697	0.925554543	0.074445457	0.505818464	0.869333333	0.639529181
376	1	0	1	1	1	0.835082459	0.164917541	0.987249545	0.840310078	0.907872697	0.925554543	0.074445457	0.505818464	0.869333333	0.639529181
376	1	0	1	1	1	0.835082459	0.164917541	0.987249545	0.840310078	0.907872697	0.925554543	0.074445457	0.505818464	0.869333333	0.639529181
376	1	0	1	1	1	0.835082459	0.164917541	0.987249545	0.840310078	0.907872697	0.925554543	0.074445457	0.505818464	0.869333333	0.639529181
376	1	0	1	1	1	0.835082459	0.164917541	0.987249545	0.840310078	0.907872697	0.925554543	0.074445457	0.505818464	0.869333333	0.639529181
376	1	0	1	1	1	0.835082459	0.164917541	0.987249545	0.840310078	0.907872697	0.925554543	0.074445457	0.505818464	0.869333333	0.639529181
376	1	0	1	1	1	0.835082459	0.164917541	0.987249545	0.840310078	0.907872697	0.925554543	0.074445457	0.505818464	0.869333333	0.639529181
376	1	0	1	1	1	0.835082459	0.164917541	0.987249545	0.840310078	0.907872697	0.925554543	0.074445457	0.505818464	0.869333333	0.639529181
376	1	0	1	1	1	0.835082459	0.164917541	0.987249545	0.840310078	0.907872697	0.925554543	0.074445457	0.505818464	0.869333333	0.639529181
376	1	0	1	1	1	0.835082459	0.164917541	0.987249545	0.840310078	0.907872697	0.925554543	0.074445457	0.505818464	0.869333333	0.639529181
376	1	0	1	1	1	0.835082459	0.164917541	0.987249545	0.840310078	0.907872697	0.925554543	0.074445457	0.505818464	0.869333333	0.639529181
376	1	0	1	1	1	0.835082459	0.164917541	0.987249545	0.840310078	0.907872697	0.925554543	0.074445457	0.505818464	0.869333333	0.639529181
376	1	0	1	1	1	0.835082459	0.164917541	0.987249545	0.840310078	0.907872697	0.925554543	0.074445457	0.505818464	0.869333333	0.639529181
376	1	0	1	1	1	0.835082459	0.164917541	0.987249545	0.840310078	0.907872697	0.925554543	0.074445457	0.505818464	0.869333333	0.639529181
376	1	0	1	1	1	0.835082459	0.164917541	0.987249545	0.840310078	0.907872697	0.925554543	0.074445457	0.505818464	0.869333333	0.639529181
376	1	0	1	1	1	0.835082459	0.164917541	0.987249545	0.840310078	0.907872697	0.925554543	0.074445457	0.505818464	0.869333333	0.639529181
376	1	0	1	1	1	0.835082459	0.164917541	0.987249545	0.840310078	0.907872697	0.925554543	0.074445457	0.505818464	0.869333333	0.639529181
376	1	0	1	1	1	0.835082459	0.164917541	0.987249545	0.840310078	0.907872697	0.925554543	0.074445457	0.505818464	0.869333333	0.639529181
376	1	0	1	1	1	0.835082459	0.164917541	0.987249545	0.840310078	0.907872697	0.925554543	0.074445457	0.505818464	0.869333333	0.639529181
376	1	0	1	1	1	0.835082459	0.164917541	0.987249545	0.840310078	0.907872697	0.925554543	0.074445457	0.505818464	0.869333333	0.639529181
376	1	0	1	1	1	0.835082459	0.164917541	0.987249545	0.840310078	0.907872697	0.925554543	0.074445457	0.505818464	0.869333333	0.639529181
376	1	0	1	1	1	0.835082459	0.164917541	0.987249545	0.840310078	0.907872697	0.925554543	0.074445457	0.505818464	0.869333333	0.639529181
376	1	0	1	1	1	0.835082459	0.164917541	0.987249545	0.840310078	0.907872697	0.925554543	0.074445457	0.505818464	0.869333333	0.639529181
376	1	0	1	1	1	0.835082459	0.164917541	0.987249545	0.840310078	0.907872697	0.925554543	0.074445457	0.505818464	0.869333333	0.639529181
376	1	0	1	1	1	0.835082459	0.164917541	0.987249545	0.840310078	0.907872697	0.925554543	0.074445457	0.505818464	0.869333333	0.639529181
376	1	0	1	1	1	0.835082459	0.164917541	0.987249545	0.840310078	0.907872697	0.925554543	0.074445457	0.505818464	0.869333333	0.639529181
376	1	0	1	1	1	0.835082459	0.164917541	0.987249545	0.840310078	0.907872697	0.925554543	0.074445457	0.505818464	0.869333333	0.639529181
376	1	0	1	1	1	0.835082459	0.164917541	0.987249545	0.840310078	0.907872697	0.925554543	0.074445457	0.505818464	0.869333333	0.639529181
376	1	0	1	1	1	0.835082459	0.164917541	0.987249545	0.840310078	0.907872697	0.925554543	0.074445457	0.505818464	0.869333333	0.639529181
376	1	0	1	1	1	0.835082459	0.164917541	0.987249545	0.840310078	0.907872697	0.925554543	0.074445457	0.505818464	0.869333333	0.639529181
376	1	0	1	1	1	0.835082459	0.164917541	0.987249545	0.840310078	0.907872697	0.925554543	0.074445457	0.505818464	0.869333333	0.639529181
376	1	0	1	1	1	0.835082459	0.164917541	0.987249545	0.840310078	0.907872697	0.925554543	0.074445457	0.505818464	0.869333333	0.639529181
376	1	0	1	1	1	0.835082459	0.164917541	0.987249545	0.840310078	0.907872697	0.925554543	0.074445457	0.505818464	0.869333333	0.639529181
376	1	0	1	1	1	0.835082459	0.164917541	0.987249545	0.840310078	0.907872697	0.925554543	0.074445457	0.505818464	0.869333333	0.639529181
376	1	0	1	1	1	0.835082459	0.164917541	0.987249545	0.840310078	0.907872697	0.925554543	0.074445457	0.505818464	0.869333333	0.639529181
376	1	0	1	1	1	0.835082459	0.164917541	0.987249545	0.840310078	0.907872697	0.925554543	0.074445457	0.505818464	0.869333333	0.639529181
375	1	0	1	1	1	0.841149773	0.158850227	0.989169675	0.84698609	0.912572856	0.926105881	0.073894119	0.506987578	0.872994652	0.641453831
375	1	0	1	1	1	0.841149773	0.158850227	0.989169675	0.84698609	0.912572856	0.926105881	0.073894119	0.506987578	0.872994652	0.641453831
375	1	0	1	1	1	0.841149773	0.158850227	0.989169675	0.84698609	0.912572856	0.926105881	0.073894119	0.506987578	0.872994652	0.641453831
375	1	0	1	1	1	0.841149773	0.158850227	0.989169675	0.84698609	0.912572856	0.926105881	0.073894119	0.506987578	0.872994652	0.641453831
375	1	0	1	1	1	0.841149773	0.158850227	0.989169675	0.84698609	0.912572856	0.926105881	0.073894119	0.506987578	0.872994652	0.641453831
374	1	0	1	1	1	0.845112782	0.154887218	0.989228007	0.850308642	0.914522822	0.925974684	0.074025316	0.50621118	0.872824632	0.640786241
373	1	0	1	1	1	0.841463415	0.158536585	0.989110708	0.847589425	0.912897822	0.926143262	0.073856738	0.508527132	0.872340426	0.642507346
373	1	0	1	1	1	0.841463415	0.158536585	0.989110708	0.847589425	0.912897822	0.926143262	0.073856738	0.508527132	0.872340426	0.642507346
372	1	0	1	1	1	0.840245776	0.159754224	0.989051095	0.846875	0.912457912	0.926787339	0.073212661	0.512062257	0.871523179	0.645098039
372	1	0	1	1	1	0.840245776	0.159754224	0.989051095	0.846875	0.912457912	0.926787339	0.073212661	0.512062257	0.871523179	0.645098039
371	1	0	1	1	1	0.845454545	0.154545455	0.98915009	0.850699844	0.914715719	0.926923077	0.073076923	0.511664075	0.875	0.645731109
371	1	0	1	1	1	0.845454545	0.154545455	0.98915009	0.850699844	0.914715719	0.926923077	0.073076923	0.511664075	0.875	0.645731109
371	1	0	1	1	1	0.845454545	0.154545455	0.98915009	0.850699844	0.914715719	0.926923077	0.073076923	0.511664075	0.875	0.645731109
371	1	0	1	1	1	0.845454545	0.154545455	0.98915009	0.850699844	0.914715719	0.926923077	0.073076923	0.511664075	0.875	0.645731109
371	1	0	1	1	1	0.845454545	0.154545455	0.98915009	0.850699844	0.914715719	0.926923077	0.073076923	0.511664075	0.875	0.645731109
371	1	0	1	1	1	0.845454545	0.154545455	0.98915009	0.850699844	0.914715719	0.926923077	0.073076923	0.511664075	0.875	0.645731109
371	1	0	1	1	1	0.845454545	0.154545455	0.98915009	0.850699844	0.914715719	0.926923077	0.073076923	0.511664075	0.875	0.645731109
371	1	0	1	1	1	0.845454545	0.154545455	0.98915009	0.850699844	0.914715719	0.926923077	0.073076923	0.511664075	0.875	0.645731109
371	1	0	1	1	1	0.845454545	0.154545455	0.98915009	0.850699844	0.914715719	0.926923077	0.073076923	0.511664075	0.875	0.645731109
371	1	0	1	1	1	0.845454545	0.154545455	0.98915009	0.850699844	0.914715719	0.926923077	0.073076923	0.511664075	0.875	0.645731109
371	1	0	1	1	1	0.845454545	0.154545455	0.98915009	0.850699844	0.914715719	0.926923077	0.073076923	0.511664075	0.875	0.645731109
371	1	0	1	1	1	0.845454545	0.154545455	0.98915009	0.850699844	0.914715719	0.926923077	0.073076923	0.511664075	0.875	0.645731109
371	1	0	1	1	1	0.845454545	0.154545455	0.98915009	0.850699844	0.914715719	0.926923077	0.073076923	0.511664075	0.875	0.645731109
371	1	0	1	1	1	0.845454545	0.154545455	0.98915009	0.850699844	0.914715719	0.926923077	0.073076923	0.511664075	0.875	0.645731109
371	1	0	1	1	1	0.845454545	0.154545455	0.98915009	0.850699844	0.914715719	0.926923077	0.073076923	0.511664075	0.875	0.645731109
371	1	0	1	1	1	0.845454545	0.154545455	0.98915009	0.850699844	0.914715719	0.926923077	0.073076923	0.511664075	0.875	0.645731109
371	1	0	1	1	1	0.845454545	0.154545455	0.98915009	0.850699844	0.914715719	0.926923077	0.073076923	0.511664075	0.875	0.645731109
371	1	0	1	1	1	0.845454545	0.154545455	0.98915009	0.850699844	0.914715719	0.926923077	0.073076923	0.511664075	0.875	0.645731109
371	1	0	1	1	1	0.845454545	0.154545455	0.98915009	0.850699844	0.914715719	0.926923077	0.073076923	0.511664075	0.875	0.645731109
371	1	0	1	1	1	0.845454545	0.154545455	0.98915009	0.850699844	0.914715719	0.926923077	0.073076923	0.511664075	0.875	0.645731109
371	1	0	1	1	1	0.845454545	0.154545455	0.98915009	0.850699844	0.914715719	0.926923077	0.073076923	0.511664075	0.875	0.645731109
371	1	0	1	1	1	0.845454545	0.154545455	0.98915009	0.850699844	0.914715719	0.926923077	0.073076923	0.511664075	0.875	0.645731109
371	1	0	1	1	1	0.845454545	0.154545455	0.98915009	0.850699844	0.914715719	0.926923077	0.073076923	0.511664075	0.875	0.645731109
371	1	0	1	1	1	0.845454545	0.154545455	0.98915009	0.850699844	0.914715719	0.926923077	0.073076923	0.511664075	0.875	0.645731109
371	1	0	1	1	1	0.845454545	0.154545455	0.98915009	0.850699844	0.914715719	0.926923077	0.073076923	0.511664075	0.875	0.645731109
371	1	0	1	1	1	0.845454545	0.154545455	0.98915009	0.850699844	0.914715719	0.926923077	0.073076923	0.511664075	0.875	0.645731109
371	1	0	1	1	1	0.845454545	0.154545455	0.98915009	0.850699844	0.914715719	0.926923077	0.073076923	0.511664075	0.875	0.645731109
371	1	0	1	1	1	0.845454545	0.154545455	0.98915009	0.850699844	0.914715719	0.926923077	0.073076923	0.511664075	0.875	0.645731109
371	1	0	1	1	1	0.845454545	0.154545455	0.98915009	0.850699844	0.914715719	0.926923077	0.073076923	0.511664075	0.875	0.645731109
371	1	0	1	1	1	0.845454545	0.154545455	0.98915009	0.850699844	0.914715719	0.926923077	0.073076923	0.511664075	0.875	0.645731109
371	1	0	1	1	1	0.845454545	0.154545455	0.98915009	0.850699844	0.914715719	0.926923077	0.073076923	0.511664075	0.875	0.645731109
371	1	0	1	1	1	0.845454545	0.154545455	0.98915009	0.850699844	0.914715719	0.926923077	0.073076923	0.511664075	0.875	0.645731109
371	1	0	1	1	1	0.845454545	0.154545455	0.98915009	0.850699844	0.914715719	0.926923077	0.073076923	0.511664075	0.875	0.645731109
371	1	0	1	1	1	0.845454545	0.154545455	0.98915009	0.850699844	0.914715719	0.926923077	0.073076923	0.511664075	0.875	0.645731109
371	1	0	1	1	1	0.845454545	0.154545455	0.98915009	0.850699844	0.914715719	0.926923077	0.073076923	0.511664075	0.875	0.645731109
371	1	0	1	1	1	0.845454545	0.154545455	0.98915009	0.850699844	0.914715719	0.926923077	0.073076923	0.511664075	0.875	0.645731109
371	1	0	1	1	1	0.845454545	0.154545455	0.98915009	0.850699844	0.914715719	0.926923077	0.073076923	0.511664075	0.875	0.645731109
371	1	0	1	1	1	0.845454545	0.154545455	0.98915009	0.850699844	0.914715719	0.926923077	0.073076923	0.511664075	0.875	0.645731109
371	1	0	1	1	1	0.845454545	0.154545455	0.98915009	0.850699844	0.914715719	0.926923077	0.073076923	0.511664075	0.875	0.645731109
371	1	0	1	1	1	0.845454545	0.154545455	0.98915009	0.850699844	0.914715719	0.926923077	0.073076923	0.511664075	0.875	0.645731109
371	1	0	1	1	1	0.845454545	0.154545455	0.98915009	0.850699844	0.914715719	0.926923077	0.073076923	0.511664075	0.875	0.645731109
371	1	0	1	1	1	0.845454545	0.154545455	0.98915009	0.850699844	0.914715719	0.926923077	0.073076923	0.511664075	0.875	0.645731109
371	1	0	1	1	1	0.845454545	0.154545455	0.98915009	0.850699844	0.914715719	0.926923077	0.073076923	0.511664075	0.875	0.645731109
371	1	0	1	1	1	0.845454545	0.154545455	0.98915009	0.850699844	0.914715719	0.926923077	0.073076923	0.511664075	0.875	0.645731109
371	1	0	1	1	1	0.845454545	0.154545455	0.98915009	0.850699844	0.914715719	0.926923077	0.073076923	0.511664075	0.875	0.645731109
371	1	0	1	1	1	0.845454545	0.154545455	0.98915009	0.850699844	0.914715719	0.926923077	0.073076923	0.511664075	0.875	0.645731109
371	1	0	1	1	1	0.845454545	0.154545455	0.98915009	0.850699844	0.914715719	0.926923077	0.073076923	0.511664075	0.875	0.645731109
371	1	0	1	1	1	0.845454545	0.154545455	0.98915009	0.850699844	0.914715719	0.926923077	0.073076923	0.511664075	0.875	0.645731109
371	1	0	1	1	1	0.845454545	0.154545455	0.98915009	0.850699844	0.914715719	0.926923077	0.073076923	0.511664075	0.875	0.645731109
371	1	0	1	1	1	0.845454545	0.154545455	0.98915009	0.850699844	0.914715719	0.926923077	0.073076923	0.511664075	0.875	0.645731109
371	1	0	1	1	1	0.845454545	0.154545455	0.98915009	0.850699844	0.914715719	0.926923077	0.073076923	0.511664075	0.875	0.645731109
371	1	0	1	1	1	0.845454545	0.154545455	0.98915009	0.850699844	0.914715719	0.926923077	0.073076923	0.511664075	0.875	0.645731109
371	1	0	1	1	1	0.845454545	0.154545455	0.98915009	0.850699844	0.914715719	0.926923077	0.073076923	0.511664075	0.875	0.645731109
371	1	0	1	1	1	0.845454545	0.154545455	0.98915009	0.850699844	0.914715719	0.926923077	0.073076923	0.511664075	0.875	0.645731109
371	1	0	1	1	1	0.845454545	0.154545455	0.98915009	0.850699844	0.914715719	0.926923077	0.073076923	0.511664075	0.875	0.645731109
371	1	0	1	1	1	0.845454545	0.154545455	0.98915009	0.850699844	0.914715719	0.926923077	0.073076923	0.511664075	0.875	0.645731109
371	1	0	1	1	1	0.845454545	0.154545455	0.98915009	0.850699844	0.914715719	0.926923077	0.073076923	0.511664075	0.875	0.645731109
371	1	0	1	1	1	0.845454545	0.154545455	0.98915009	0.850699844	0.914715719	0.926923077	0.073076923	0.511664075	0.875	0.645731109
371	1	0	1	1	1	0.845454545	0.154545455	0.98915009	0.850699844	0.914715719	0.926923077	0.073076923	0.511664075	0.875	0.645731109
371	1	0	1	1	1	0.845454545	0.154545455	0.98915009	0.850699844	0.914715719	0.926923077	0.073076923	0.511664075	0.875	0.645731109
371	1	0	1	1	1	0.845454545	0.154545455	0.98915009	0.850699844	0.914715719	0.926923077	0.073076923	0.511664075	0.875	0.645731109
371	1	0	1	1	1	0.845454545	0.154545455	0.98915009	0.850699844	0.914715719	0.926923077	0.073076923	0.511664075	0.875	0.645731109
371	1	0	1	1	1	0.845454545	0.154545455	0.98915009	0.850699844	0.914715719	0.926923077	0.073076923	0.511664075	0.875	0.645731109
371	1	0	1	1	1	0.845454545	0.154545455	0.98915009	0.850699844	0.914715719	0.926923077	0.073076923	0.511664075	0.875	0.645731109
371	1	0	1	1	1	0.845454545	0.154545455	0.98915009	0.850699844	0.914715719	0.926923077	0.073076923	0.511664075	0.875	0.645731109
371	1	0	1	1	1	0.845454545	0.154545455	0.98915009	0.850699844	0.914715719	0.926923077	0.073076923	0.511664075	0.875	0.645731109
371	1	0	1	1	1	0.845454545	0.154545455	0.98915009	0.850699844	0.914715719	0.926923077	0.073076923	0.511664075	0.875	0.645731109
371	1	0	1	1	1	0.845454545	0.154545455	0.98915009	0.850699844	0.914715719	0.926923077	0.073076923	0.511664075	0.875	0.645731109
371	1	0	1	1	1	0.845454545	0.154545455	0.98915009	0.850699844	0.914715719	0.926923077	0.073076923	0.511664075	0.875	0.645731109
371	1	0	1	1	1	0.845454545	0.154545455	0.98915009	0.850699844	0.914715719	0.926923077	0.073076923	0.511664075	0.875	0.645731109
371	1	0	1	1	1	0.845454545	0.154545455	0.98915009	0.850699844	0.914715719	0.926923077	0.073076923	0.511664075	0.875	0.645731109
371	1	0	1	1	1	0.845454545	0.154545455	0.98915009	0.850699844	0.914715719	0.926923077	0.073076923	0.511664075	0.875	0.645731109
371	1	0	1	1	1	0.845454545	0.154545455	0.98915009	0.850699844	0.914715719	0.926923077	0.073076923	0.511664075	0.875	0.645731109
371	1	0	1	1	1	0.845454545	0.154545455	0.98915009	0.850699844	0.914715719	0.926923077	0.073076923	0.511664075	0.875	0.645731109
371	1	0	1	1	1	0.845454545	0.154545455	0.98915009	0.850699844	0.914715719	0.926923077	0.073076923	0.511664075	0.875	0.645731109
371	1	0	1	1	1	0.845454545	0.154545455	0.98915009	0.850699844	0.914715719	0.926923077	0.073076923	0.511664075	0.875	0.645731109
371	1	0	1	1	1	0.845454545	0.154545455	0.98915009	0.850699844	0.914715719	0.926923077	0.073076923	0.511664075	0.875	0.645731109
371	1	0	1	1	1	0.845454545	0.154545455	0.98915009	0.850699844	0.914715719	0.926923077	0.073076923	0.511664075	0.875	0.645731109
371	1	0	1	1	1	0.845454545	0.154545455	0.98915009	0.850699844	0.914715719	0.926923077	0.073076923	0.511664075	0.875	0.645731109
371	1	0	1	1	1	0.845454545	0.154545455	0.98915009	0.850699844	0.914715719	0.926923077	0.073076923	0.511664075	0.875	0.645731109
371	1	0	1	1	1	0.845454545	0.154545455	0.98915009	0.850699844	0.914715719	0.926923077	0.073076923	0.511664075	0.875	0.645731109
371	1	0	1	1	1	0.845454545	0.154545455	0.98915009	0.850699844	0.914715719	0.926923077	0.073076923	0.511664075	0.875	0.645731109
371	1	0	1	1	1	0.845454545	0.154545455	0.98915009	0.850699844	0.914715719	0.926923077	0.073076923	0.511664075	0.875	0.645731109
371	1	0	1	1	1	0.845454545	0.154545455	0.98915009	0.850699844	0.914715719	0.926923077	0.073076923	0.511664075	0.875	0.645731109
371	1	0	1	1	1	0.845454545	0.154545455	0.98915009	0.850699844	0.914715719	0.926923077	0.073076923	0.511664075	0.875	0.645731109
371	1	0	1	1	1	0.845454545	0.154545455	0.98915009	0.850699844	0.914715719	0.926923077	0.073076923	0.511664075	0.875	0.645731109
371	1	0	1	1	1	0.845454545	0.154545455	0.98915009	0.850699844	0.914715719	0.926923077	0.073076923	0.511664075	0.875	0.645731109
371	1	0	1	1	1	0.845454545	0.154545455	0.98915009	0.850699844	0.914715719	0.926923077	0.073076923	0.511664075	0.875	0.645731109
371	1	0	1	1	1	0.845454545	0.154545455	0.98915009	0.850699844	0.914715719	0.926923077	0.073076923	0.511664075	0.875	0.645731109
371	1	0	1	1	1	0.845454545	0.154545455	0.98915009	0.850699844	0.914715719	0.926923077	0.073076923	0.511664075	0.875	0.645731109
371	1	0	1	1	1	0.845454545	0.154545455	0.98915009	0.850699844	0.914715719	0.926923077	0.073076923	0.511664075	0.875	0.645731109
371	1	0	1	1	1	0.845454545	0.154545455	0.98915009	0.850699844	0.914715719	0.926923077	0.073076923	0.511664075	0.875	0.645731109
371	1	0	1	1	1	0.845454545	0.154545455	0.98915009	0.850699844	0.914715719	0.926923077	0.073076923	0.511664075	0.875	0.645731109
371	1	0	1	1	1	0.845454545	0.154545455	0.98915009	0.850699844	0.914715719	0.926923077	0.073076923	0.511664075	0.875	0.645731109
371	1	0	1	1	1	0.845454545	0.154545455	0.98915009	0.850699844	0.914715719	0.926923077	0.073076923	0.511664075	0.875	0.645731109
371	1	0	1	1	1	0.845454545	0.154545455	0.98915009	0.850699844	0.914715719	0.926923077	0.073076923	0.511664075	0.875	0.645731109
371	1	0	1	1	1	0.845454545	0.154545455	0.98915009	0.850699844	0.914715719	0.926923077	0.073076923	0.511664075	0.875	0.645731109
371	1	0	1	1	1	0.845454545	0.154545455	0.98915009	0.850699844	0.914715719	0.926923077	0.073076923	0.511664075	0.875	0.645731109
371	1	0	1	1	1	0.845454545	0.154545455	0.98915009	0.850699844	0.914715719	0.926923077	0.073076923	0.511664075	0.875	0.645731109
371	1	0	1	1	1	0.845454545	0.154545455	0.98915009	0.850699844	0.914715719	0.926923077	0.073076923	0.511664075	0.875	0.645731109
371	1	0	1	1	1	0.845454545	0.154545455	0.98915009	0.850699844	0.914715719	0.926923077	0.073076923	0.511664075	0.875	0.645731109
371	1	0	1	1	1	0.845454545	0.154545455	0.98915009	0.850699844	0.914715719	0.926923077	0.073076923	0.511664075	0.875	0.645731109
371	1	0	1	1	1	0.845454545	0.154545455	0.98915009	0.850699844	0.914715719	0.926923077	0.073076923	0.511664075	0.875	0.645731109
371	1	0	1	1	1	0.845454545	0.154545455	0.98915009	0.850699844	0.914715719	0.926923077	0.073076923	0.511664075	0.875	0.645731109
371	1	0	1	1	1	0.845454545	0.154545455	0.98915009	0.850699844	0.914715719	0.926923077	0.073076923	0.511664075	0.875	0.645731109
371	1	0	1	1	1	0.845454545	0.154545455	0.98915009	0.850699844	0.914715719	0.926923077	0.073076923	0.511664075	0.875	0.645731109
371	1	0	1	1	1	0.845454545	0.154545455	0.98915009	0.850699844	0.914715719	0.926923077	0.073076923	0.511664075	0.875	0.645731109
371	1	0	1	1	1	0.845454545	0.154545455	0.98915009	0.850699844	0.914715719	0.926923077	0.073076923	0.511664075	0.875	0.645731109
371	1	0	1	1	1	0.845454545	0.154545455	0.98915009	0.850699844	0.914715719	0.926923077	0.073076923	0.511664075	0.875	0.645731109
371	1	0	1	1	1	0.845454545	0.154545455	0.98915009	0.850699844	0.914715719	0.926923077	0.073076923	0.511664075	0.875	0.645731109
371	1	0	1	1	1	0.845454545	0.154545455	0.98915009	0.850699844	0.914715719	0.926923077	0.073076923	0.511664075	0.875	0.645731109
371	1	0	1	1	1	0.845454545	0.154545455	0.98915009	0.850699844	0.914715719	0.926923077	0.073076923	0.511664075	0.875	0.645731109
371	1	0	1	1	1	0.845454545	0.154545455	0.98915009	0.850699844	0.914715719	0.926923077	0.073076923	0.511664075	0.875	0.645731109
371	1	0	1	1	1	0.845454545	0.154545455	0.98915009	0.850699844	0.914715719	0.926923077	0.073076923	0.511664075	0.875	0.645731109
371	1	0	1	1	1	0.845454545	0.154545455	0.98915009	0.850699844	0.914715719	0.926923077	0.073076923	0.511664075	0.875	0.645731109
371	1	0	1	1	1	0.845454545	0.154545455	0.98915009	0.850699844	0.914715719	0.926923077	0.073076923	0.511664075	0.875	0.645731109
371	1	0	1	1	1	0.845454545	0.154545455	0.98915009	0.850699844	0.914715719	0.926923077	0.073076923	0.511664075	0.875	0.645731109
371	1	0	1	1	1	0.845454545	0.154545455	0.98915009	0.850699844	0.914715719	0.926923077	0.073076923	0.511664075	0.875	0.645731109
371	1	0	1	1	1	0.845454545	0.154545455	0.98915009	0.850699844	0.914715719	0.926923077	0.073076923	0.511664075	0.875	0.645731109
371	1	0	1	1	1	0.845454545	0.154545455	0.98915009	0.850699844	0.914715719	0.926923077	0.073076923	0.511664075	0.875	0.645731109
371	1	0	1	1	1	0.845454545	0.154545455	0.98915009	0.850699844	0.914715719	0.926923077	0.073076923	0.511664075	0.875	0.645731109
371	1	0	1	1	1	0.845454545	0.154545455	0.98915009	0.850699844	0.914715719	0.926923077	0.073076923	0.511664075	0.875	0.645731109
371	1	0	1	1	1	0.845454545	0.154545455	0.98915009	0.850699844	0.914715719	0.926923077	0.073076923	0.511664075	0.875	0.645731109
371	1	0	1	1	1	0.845454545	0.154545455	0.98915009	0.850699844	0.914715719	0.926923077	0.073076923	0.511664075	0.875	0.645731109
371	1	0	1	1	1	0.845454545	0.154545455	0.98915009	0.850699844	0.914715719	0.926923077	0.073076923	0.511664075	0.875	0.645731109
371	1	0	1	1	1	0.845454545	0.154545455	0.98915009	0.850699844	0.914715719	0.926923077	0.073076923	0.511664075	0.875	0.645731109
371	1	0	1	1	1	0.845454545	0.154545455	0.98915009	0.850699844	0.914715719	0.926923077	0.073076923	0.511664075	0.875	0.645731109
371	1	0	1	1	1	0.845454545	0.154545455	0.98915009	0.850699844	0.914715719	0.926923077	0.073076923	0.511664075	0.875	0.645731109
371	1	0	1	1	1	0.845454545	0.154545455	0.98915009	0.850699844	0.914715719	0.926923077	0.073076923	0.511664075	0.875	0.645731109
371	1	0	1	1	1	0.845454545	0.154545455	0.98915009	0.850699844	0.914715719	0.926923077	0.073076923	0.511664075	0.875	0.645731109
371	1	0	1	1	1	0.845454545	0.154545455	0.98915009	0.850699844	0.914715719	0.926923077	0.073076923	0.511664075	0.875	0.645731109
371	1	0	1	1	1	0.845454545	0.154545455	0.98915009	0.850699844	0.914715719	0.926923077	0.073076923	0.511664075	0.875	0.645731109
371	1	0	1	1	1	0.845454545	0.154545455	0.98915009	0.850699844	0.914715719	0.926923077	0.073076923	0.511664075	0.875	0.645731109
371	1	0	1	1	1	0.845454545	0.154545455	0.98915009	0.850699844	0.914715719	0.926923077	0.073076923	0.511664075	0.875	0.645731109
371	1	0	1	1	1	0.845454545	0.154545455	0.98915009	0.850699844	0.914715719	0.926923077	0.073076923	0.511664075	0.875	0.645731109
371	1	0	1	1	1	0.845454545	0.154545455	0.98915009	0.850699844	0.914715719	0.926923077	0.073076923	0.511664075	0.875	0.645731109
371	1	0	1	1	1	0.845454545	0.154545455	0.98915009	0.850699844	0.914715719	0.926923077	0.073076923	0.511664075	0.875	0.645731109
371	1	0	1	1	1	0.845454545	0.154545455	0.98915009	0.850699844	0.914715719	0.926923077	0.073076923	0.511664075	0.875	0.645731109
371	1	0	1	1	1	0.845454545	0.154545455	0.98915009	0.850699844	0.914715719	0.926923077	0.073076923	0.511664075	0.875	0.645731109
371	1	0	1	1	1	0.845454545	0.154545455	0.98915009	0.850699844	0.914715719	0.926923077	0.073076923	0.511664075	0.875	0.645731109
371	1	0	1	1	1	0.845454545	0.154545455	0.98915009	0.850699844	0.914715719	0.926923077	0.073076923	0.511664075	0.875	0.645731109
371	1	0	1	1	1	0.845454545	0.154545455	0.98915009	0.850699844	0.914715719	0.926923077	0.073076923	0.511664075	0.875	0.645731109
371	1	0	1	1	1	0.845454545	0.154545455	0.98915009	0.850699844	0.914715719	0.926923077	0.073076923	0.511664075	0.875	0.645731109
371	1	0	1	1	1	0.845454545	0.154545455	0.98915009	0.850699844	0.914715719	0.926923077	0.073076923	0.511664075	0.875	0.645731109
371	1	0	1	1	1	0.845454545	0.154545455	0.98915009	0.850699844	0.914715719	0.926923077	0.073076923	0.511664075	0.875	0.645731109
