# Supplementary material for: An Improved Hybrid Feature Selection Algorithm for Electric Charge Recovery Risk
Source: Hindawi journal article supplement (doi:10.1155/2020/8479341), 2020-08-28
Supplement: f1 [file 8479341.f1.zip › 8479341.f1/Experimental Results/201806/HPSO_SSM_results.csv]

features_num	Accuracy_high	Loss_high	Precission_high	Recall_high	F1_high	Accuracy_med	Loss_med	Precission_med	Recall_med	F1_med	Accuracy_low	Loss_low	Precission_low	Recall_low	F1_low
170	1.0	0.0	1.0	1.0	1.0	0.8560700876095119	0.14392991239048816	0.914651493598862	0.9212034383954156	0.9179157744468236	0.9079042039264056	0.09209579607359443	0.4102127659574468	0.7036496350364964	0.5182795698924733
175	1.0	0.0	1.0	1.0	1.0	0.8462515883100381	0.1537484116899619	0.9844479004665628	0.8508064516129032	0.912761355443403	0.8941864041833282	0.10581359581667182	0.3745885450954575	0.8740399385560675	0.5244239631336405
175	1.0	0.0	1.0	1.0	1.0	0.8462515883100381	0.1537484116899619	0.9844479004665628	0.8508064516129032	0.912761355443403	0.8941864041833282	0.10581359581667182	0.3745885450954575	0.8740399385560675	0.5244239631336405
175	1.0	0.0	1.0	1.0	1.0	0.8462515883100381	0.1537484116899619	0.9844479004665628	0.8508064516129032	0.912761355443403	0.8941864041833282	0.10581359581667182	0.3745885450954575	0.8740399385560675	0.5244239631336405
175	1.0	0.0	1.0	1.0	1.0	0.8462515883100381	0.1537484116899619	0.9844479004665628	0.8508064516129032	0.912761355443403	0.8941864041833282	0.10581359581667182	0.3745885450954575	0.8740399385560675	0.5244239631336405
175	1.0	0.0	1.0	1.0	1.0	0.8462515883100381	0.1537484116899619	0.9844479004665628	0.8508064516129032	0.912761355443403	0.8941864041833282	0.10581359581667182	0.3745885450954575	0.8740399385560675	0.5244239631336405
175	1.0	0.0	1.0	1.0	1.0	0.8462515883100381	0.1537484116899619	0.9844479004665628	0.8508064516129032	0.912761355443403	0.8941864041833282	0.10581359581667182	0.3745885450954575	0.8740399385560675	0.5244239631336405
175	1.0	0.0	1.0	1.0	1.0	0.8462515883100381	0.1537484116899619	0.9844479004665628	0.8508064516129032	0.912761355443403	0.8941864041833282	0.10581359581667182	0.3745885450954575	0.8740399385560675	0.5244239631336405
175	1.0	0.0	1.0	1.0	1.0	0.8462515883100381	0.1537484116899619	0.9844479004665628	0.8508064516129032	0.912761355443403	0.8941864041833282	0.10581359581667182	0.3745885450954575	0.8740399385560675	0.5244239631336405
175	1.0	0.0	1.0	1.0	1.0	0.8462515883100381	0.1537484116899619	0.9844479004665628	0.8508064516129032	0.912761355443403	0.8941864041833282	0.10581359581667182	0.3745885450954575	0.8740399385560675	0.5244239631336405
175	1.0	0.0	1.0	1.0	1.0	0.8462515883100381	0.1537484116899619	0.9844479004665628	0.8508064516129032	0.912761355443403	0.8941864041833282	0.10581359581667182	0.3745885450954575	0.8740399385560675	0.5244239631336405
175	1.0	0.0	1.0	1.0	1.0	0.8462515883100381	0.1537484116899619	0.9844479004665628	0.8508064516129032	0.912761355443403	0.8941864041833282	0.10581359581667182	0.3745885450954575	0.8740399385560675	0.5244239631336405
175	1.0	0.0	1.0	1.0	1.0	0.8462515883100381	0.1537484116899619	0.9844479004665628	0.8508064516129032	0.912761355443403	0.8941864041833282	0.10581359581667182	0.3745885450954575	0.8740399385560675	0.5244239631336405
175	1.0	0.0	1.0	1.0	1.0	0.8462515883100381	0.1537484116899619	0.9844479004665628	0.8508064516129032	0.912761355443403	0.8941864041833282	0.10581359581667182	0.3745885450954575	0.8740399385560675	0.5244239631336405
175	1.0	0.0	1.0	1.0	1.0	0.8462515883100381	0.1537484116899619	0.9844479004665628	0.8508064516129032	0.912761355443403	0.8941864041833282	0.10581359581667182	0.3745885450954575	0.8740399385560675	0.5244239631336405
175	1.0	0.0	1.0	1.0	1.0	0.8462515883100381	0.1537484116899619	0.9844479004665628	0.8508064516129032	0.912761355443403	0.8941864041833282	0.10581359581667182	0.3745885450954575	0.8740399385560675	0.5244239631336405
175	1.0	0.0	1.0	1.0	1.0	0.8462515883100381	0.1537484116899619	0.9844479004665628	0.8508064516129032	0.912761355443403	0.8941864041833282	0.10581359581667182	0.3745885450954575	0.8740399385560675	0.5244239631336405
175	1.0	0.0	1.0	1.0	1.0	0.8462515883100381	0.1537484116899619	0.9844479004665628	0.8508064516129032	0.912761355443403	0.8941864041833282	0.10581359581667182	0.3745885450954575	0.8740399385560675	0.5244239631336405
175	1.0	0.0	1.0	1.0	1.0	0.8462515883100381	0.1537484116899619	0.9844479004665628	0.8508064516129032	0.912761355443403	0.8941864041833282	0.10581359581667182	0.3745885450954575	0.8740399385560675	0.5244239631336405
175	1.0	0.0	1.0	1.0	1.0	0.8462515883100381	0.1537484116899619	0.9844479004665628	0.8508064516129032	0.912761355443403	0.8941864041833282	0.10581359581667182	0.3745885450954575	0.8740399385560675	0.5244239631336405
175	1.0	0.0	1.0	1.0	1.0	0.8462515883100381	0.1537484116899619	0.9844479004665628	0.8508064516129032	0.912761355443403	0.8941864041833282	0.10581359581667182	0.3745885450954575	0.8740399385560675	0.5244239631336405
175	1.0	0.0	1.0	1.0	1.0	0.8462515883100381	0.1537484116899619	0.9844479004665628	0.8508064516129032	0.912761355443403	0.8941864041833282	0.10581359581667182	0.3745885450954575	0.8740399385560675	0.5244239631336405
175	1.0	0.0	1.0	1.0	1.0	0.8462515883100381	0.1537484116899619	0.9844479004665628	0.8508064516129032	0.912761355443403	0.8941864041833282	0.10581359581667182	0.3745885450954575	0.8740399385560675	0.5244239631336405
175	1.0	0.0	1.0	1.0	1.0	0.8462515883100381	0.1537484116899619	0.9844479004665628	0.8508064516129032	0.912761355443403	0.8941864041833282	0.10581359581667182	0.3745885450954575	0.8740399385560675	0.5244239631336405
175	1.0	0.0	1.0	1.0	1.0	0.8462515883100381	0.1537484116899619	0.9844479004665628	0.8508064516129032	0.912761355443403	0.8941864041833282	0.10581359581667182	0.3745885450954575	0.8740399385560675	0.5244239631336405
175	1.0	0.0	1.0	1.0	1.0	0.8462515883100381	0.1537484116899619	0.9844479004665628	0.8508064516129032	0.912761355443403	0.8941864041833282	0.10581359581667182	0.3745885450954575	0.8740399385560675	0.5244239631336405
175	1.0	0.0	1.0	1.0	1.0	0.8462515883100381	0.1537484116899619	0.9844479004665628	0.8508064516129032	0.912761355443403	0.8941864041833282	0.10581359581667182	0.3745885450954575	0.8740399385560675	0.5244239631336405
175	1.0	0.0	1.0	1.0	1.0	0.8462515883100381	0.1537484116899619	0.9844479004665628	0.8508064516129032	0.912761355443403	0.8941864041833282	0.10581359581667182	0.3745885450954575	0.8740399385560675	0.5244239631336405
175	1.0	0.0	1.0	1.0	1.0	0.8462515883100381	0.1537484116899619	0.9844479004665628	0.8508064516129032	0.912761355443403	0.8941864041833282	0.10581359581667182	0.3745885450954575	0.8740399385560675	0.5244239631336405
175	1.0	0.0	1.0	1.0	1.0	0.8462515883100381	0.1537484116899619	0.9844479004665628	0.8508064516129032	0.912761355443403	0.8941864041833282	0.10581359581667182	0.3745885450954575	0.8740399385560675	0.5244239631336405
175	1.0	0.0	1.0	1.0	1.0	0.8462515883100381	0.1537484116899619	0.9844479004665628	0.8508064516129032	0.912761355443403	0.8941864041833282	0.10581359581667182	0.3745885450954575	0.8740399385560675	0.5244239631336405
175	1.0	0.0	1.0	1.0	1.0	0.8462515883100381	0.1537484116899619	0.9844479004665628	0.8508064516129032	0.912761355443403	0.8941864041833282	0.10581359581667182	0.3745885450954575	0.8740399385560675	0.5244239631336405
175	1.0	0.0	1.0	1.0	1.0	0.8462515883100381	0.1537484116899619	0.9844479004665628	0.8508064516129032	0.912761355443403	0.8941864041833282	0.10581359581667182	0.3745885450954575	0.8740399385560675	0.5244239631336405
175	1.0	0.0	1.0	1.0	1.0	0.8462515883100381	0.1537484116899619	0.9844479004665628	0.8508064516129032	0.912761355443403	0.8941864041833282	0.10581359581667182	0.3745885450954575	0.8740399385560675	0.5244239631336405
175	1.0	0.0	1.0	1.0	1.0	0.8462515883100381	0.1537484116899619	0.9844479004665628	0.8508064516129032	0.912761355443403	0.8941864041833282	0.10581359581667182	0.3745885450954575	0.8740399385560675	0.5244239631336405
175	1.0	0.0	1.0	1.0	1.0	0.8462515883100381	0.1537484116899619	0.9844479004665628	0.8508064516129032	0.912761355443403	0.8941864041833282	0.10581359581667182	0.3745885450954575	0.8740399385560675	0.5244239631336405
175	1.0	0.0	1.0	1.0	1.0	0.8462515883100381	0.1537484116899619	0.9844479004665628	0.8508064516129032	0.912761355443403	0.8941864041833282	0.10581359581667182	0.3745885450954575	0.8740399385560675	0.5244239631336405
175	1.0	0.0	1.0	1.0	1.0	0.8462515883100381	0.1537484116899619	0.9844479004665628	0.8508064516129032	0.912761355443403	0.8941864041833282	0.10581359581667182	0.3745885450954575	0.8740399385560675	0.5244239631336405
175	1.0	0.0	1.0	1.0	1.0	0.8462515883100381	0.1537484116899619	0.9844479004665628	0.8508064516129032	0.912761355443403	0.8941864041833282	0.10581359581667182	0.3745885450954575	0.8740399385560675	0.5244239631336405
175	1.0	0.0	1.0	1.0	1.0	0.8462515883100381	0.1537484116899619	0.9844479004665628	0.8508064516129032	0.912761355443403	0.8941864041833282	0.10581359581667182	0.3745885450954575	0.8740399385560675	0.5244239631336405
175	1.0	0.0	1.0	1.0	1.0	0.8462515883100381	0.1537484116899619	0.9844479004665628	0.8508064516129032	0.912761355443403	0.8941864041833282	0.10581359581667182	0.3745885450954575	0.8740399385560675	0.5244239631336405
175	1.0	0.0	1.0	1.0	1.0	0.8462515883100381	0.1537484116899619	0.9844479004665628	0.8508064516129032	0.912761355443403	0.8941864041833282	0.10581359581667182	0.3745885450954575	0.8740399385560675	0.5244239631336405
217	1.0	0.0	1.0	1.0	1.0	0.8895631067961165	0.1104368932038835	0.9901269393511988	0.8931297709923665	0.9391304347826088	0.9032523672293123	0.09674763277068754	0.37039937353171504	0.7766830870279147	0.5015906680805938
217	1.0	0.0	1.0	1.0	1.0	0.8895631067961165	0.1104368932038835	0.9901269393511988	0.8931297709923665	0.9391304347826088	0.9032523672293123	0.09674763277068754	0.37039937353171504	0.7766830870279147	0.5015906680805938
217	1.0	0.0	1.0	1.0	1.0	0.8895631067961165	0.1104368932038835	0.9901269393511988	0.8931297709923665	0.9391304347826088	0.9032523672293123	0.09674763277068754	0.37039937353171504	0.7766830870279147	0.5015906680805938
217	1.0	0.0	1.0	1.0	1.0	0.8895631067961165	0.1104368932038835	0.9901269393511988	0.8931297709923665	0.9391304347826088	0.9032523672293123	0.09674763277068754	0.37039937353171504	0.7766830870279147	0.5015906680805938
217	1.0	0.0	1.0	1.0	1.0	0.8895631067961165	0.1104368932038835	0.9901269393511988	0.8931297709923665	0.9391304347826088	0.9032523672293123	0.09674763277068754	0.37039937353171504	0.7766830870279147	0.5015906680805938
242	1.0	0.0	1.0	1.0	1.0	0.8025134649910234	0.19748653500897664	1.0	0.8021582733812951	0.8902195608782436	0.9449063407793248	0.05509365922067511	0.6177669111654441	0.9034564958283672	0.7337850919651501
242	1.0	0.0	1.0	1.0	1.0	0.8025134649910234	0.19748653500897664	1.0	0.8021582733812951	0.8902195608782436	0.9449063407793248	0.05509365922067511	0.6177669111654441	0.9034564958283672	0.7337850919651501
242	1.0	0.0	1.0	1.0	1.0	0.8025134649910234	0.19748653500897664	1.0	0.8021582733812951	0.8902195608782436	0.9449063407793248	0.05509365922067511	0.6177669111654441	0.9034564958283672	0.7337850919651501
242	1.0	0.0	1.0	1.0	1.0	0.8025134649910234	0.19748653500897664	1.0	0.8021582733812951	0.8902195608782436	0.9449063407793248	0.05509365922067511	0.6177669111654441	0.9034564958283672	0.7337850919651501
242	1.0	0.0	1.0	1.0	1.0	0.8025134649910234	0.19748653500897664	1.0	0.8021582733812951	0.8902195608782436	0.9449063407793248	0.05509365922067511	0.6177669111654441	0.9034564958283672	0.7337850919651501
242	1.0	0.0	1.0	1.0	1.0	0.8025134649910234	0.19748653500897664	1.0	0.8021582733812951	0.8902195608782436	0.9449063407793248	0.05509365922067511	0.6177669111654441	0.9034564958283672	0.7337850919651501
242	1.0	0.0	1.0	1.0	1.0	0.8025134649910234	0.19748653500897664	1.0	0.8021582733812951	0.8902195608782436	0.9449063407793248	0.05509365922067511	0.6177669111654441	0.9034564958283672	0.7337850919651501
242	1.0	0.0	1.0	1.0	1.0	0.8025134649910234	0.19748653500897664	1.0	0.8021582733812951	0.8902195608782436	0.9449063407793248	0.05509365922067511	0.6177669111654441	0.9034564958283672	0.7337850919651501
242	1.0	0.0	1.0	1.0	1.0	0.8025134649910234	0.19748653500897664	1.0	0.8021582733812951	0.8902195608782436	0.9449063407793248	0.05509365922067511	0.6177669111654441	0.9034564958283672	0.7337850919651501
242	1.0	0.0	1.0	1.0	1.0	0.8025134649910234	0.19748653500897664	1.0	0.8021582733812951	0.8902195608782436	0.9449063407793248	0.05509365922067511	0.6177669111654441	0.9034564958283672	0.7337850919651501
242	1.0	0.0	1.0	1.0	1.0	0.8025134649910234	0.19748653500897664	1.0	0.8021582733812951	0.8902195608782436	0.9449063407793248	0.05509365922067511	0.6177669111654441	0.9034564958283672	0.7337850919651501
242	1.0	0.0	1.0	1.0	1.0	0.8025134649910234	0.19748653500897664	1.0	0.8021582733812951	0.8902195608782436	0.9449063407793248	0.05509365922067511	0.6177669111654441	0.9034564958283672	0.7337850919651501
242	1.0	0.0	1.0	1.0	1.0	0.8025134649910234	0.19748653500897664	1.0	0.8021582733812951	0.8902195608782436	0.9449063407793248	0.05509365922067511	0.6177669111654441	0.9034564958283672	0.7337850919651501
242	1.0	0.0	1.0	1.0	1.0	0.8025134649910234	0.19748653500897664	1.0	0.8021582733812951	0.8902195608782436	0.9449063407793248	0.05509365922067511	0.6177669111654441	0.9034564958283672	0.7337850919651501
242	1.0	0.0	1.0	1.0	1.0	0.8025134649910234	0.19748653500897664	1.0	0.8021582733812951	0.8902195608782436	0.9449063407793248	0.05509365922067511	0.6177669111654441	0.9034564958283672	0.7337850919651501
242	1.0	0.0	1.0	1.0	1.0	0.8025134649910234	0.19748653500897664	1.0	0.8021582733812951	0.8902195608782436	0.9449063407793248	0.05509365922067511	0.6177669111654441	0.9034564958283672	0.7337850919651501
242	1.0	0.0	1.0	1.0	1.0	0.8025134649910234	0.19748653500897664	1.0	0.8021582733812951	0.8902195608782436	0.9449063407793248	0.05509365922067511	0.6177669111654441	0.9034564958283672	0.7337850919651501
242	1.0	0.0	1.0	1.0	1.0	0.8025134649910234	0.19748653500897664	1.0	0.8021582733812951	0.8902195608782436	0.9449063407793248	0.05509365922067511	0.6177669111654441	0.9034564958283672	0.7337850919651501
242	1.0	0.0	1.0	1.0	1.0	0.8025134649910234	0.19748653500897664	1.0	0.8021582733812951	0.8902195608782436	0.9449063407793248	0.05509365922067511	0.6177669111654441	0.9034564958283672	0.7337850919651501
242	1.0	0.0	1.0	1.0	1.0	0.8025134649910234	0.19748653500897664	1.0	0.8021582733812951	0.8902195608782436	0.9449063407793248	0.05509365922067511	0.6177669111654441	0.9034564958283672	0.7337850919651501
242	1.0	0.0	1.0	1.0	1.0	0.8025134649910234	0.19748653500897664	1.0	0.8021582733812951	0.8902195608782436	0.9449063407793248	0.05509365922067511	0.6177669111654441	0.9034564958283672	0.7337850919651501
242	1.0	0.0	1.0	1.0	1.0	0.8025134649910234	0.19748653500897664	1.0	0.8021582733812951	0.8902195608782436	0.9449063407793248	0.05509365922067511	0.6177669111654441	0.9034564958283672	0.7337850919651501
242	1.0	0.0	1.0	1.0	1.0	0.8025134649910234	0.19748653500897664	1.0	0.8021582733812951	0.8902195608782436	0.9449063407793248	0.05509365922067511	0.6177669111654441	0.9034564958283672	0.7337850919651501
242	1.0	0.0	1.0	1.0	1.0	0.8025134649910234	0.19748653500897664	1.0	0.8021582733812951	0.8902195608782436	0.9449063407793248	0.05509365922067511	0.6177669111654441	0.9034564958283672	0.7337850919651501
242	1.0	0.0	1.0	1.0	1.0	0.8025134649910234	0.19748653500897664	1.0	0.8021582733812951	0.8902195608782436	0.9449063407793248	0.05509365922067511	0.6177669111654441	0.9034564958283672	0.7337850919651501
242	1.0	0.0	1.0	1.0	1.0	0.8025134649910234	0.19748653500897664	1.0	0.8021582733812951	0.8902195608782436	0.9449063407793248	0.05509365922067511	0.6177669111654441	0.9034564958283672	0.7337850919651501
242	1.0	0.0	1.0	1.0	1.0	0.8025134649910234	0.19748653500897664	1.0	0.8021582733812951	0.8902195608782436	0.9449063407793248	0.05509365922067511	0.6177669111654441	0.9034564958283672	0.7337850919651501
242	1.0	0.0	1.0	1.0	1.0	0.8025134649910234	0.19748653500897664	1.0	0.8021582733812951	0.8902195608782436	0.9449063407793248	0.05509365922067511	0.6177669111654441	0.9034564958283672	0.7337850919651501
242	1.0	0.0	1.0	1.0	1.0	0.8025134649910234	0.19748653500897664	1.0	0.8021582733812951	0.8902195608782436	0.9449063407793248	0.05509365922067511	0.6177669111654441	0.9034564958283672	0.7337850919651501
242	1.0	0.0	1.0	1.0	1.0	0.8025134649910234	0.19748653500897664	1.0	0.8021582733812951	0.8902195608782436	0.9449063407793248	0.05509365922067511	0.6177669111654441	0.9034564958283672	0.7337850919651501
242	1.0	0.0	1.0	1.0	1.0	0.8025134649910234	0.19748653500897664	1.0	0.8021582733812951	0.8902195608782436	0.9449063407793248	0.05509365922067511	0.6177669111654441	0.9034564958283672	0.7337850919651501
242	1.0	0.0	1.0	1.0	1.0	0.8025134649910234	0.19748653500897664	1.0	0.8021582733812951	0.8902195608782436	0.9449063407793248	0.05509365922067511	0.6177669111654441	0.9034564958283672	0.7337850919651501
242	1.0	0.0	1.0	1.0	1.0	0.8025134649910234	0.19748653500897664	1.0	0.8021582733812951	0.8902195608782436	0.9449063407793248	0.05509365922067511	0.6177669111654441	0.9034564958283672	0.7337850919651501
242	1.0	0.0	1.0	1.0	1.0	0.8025134649910234	0.19748653500897664	1.0	0.8021582733812951	0.8902195608782436	0.9449063407793248	0.05509365922067511	0.6177669111654441	0.9034564958283672	0.7337850919651501
242	1.0	0.0	1.0	1.0	1.0	0.8025134649910234	0.19748653500897664	1.0	0.8021582733812951	0.8902195608782436	0.9449063407793248	0.05509365922067511	0.6177669111654441	0.9034564958283672	0.7337850919651501
242	1.0	0.0	1.0	1.0	1.0	0.8025134649910234	0.19748653500897664	1.0	0.8021582733812951	0.8902195608782436	0.9449063407793248	0.05509365922067511	0.6177669111654441	0.9034564958283672	0.7337850919651501
242	1.0	0.0	1.0	1.0	1.0	0.8025134649910234	0.19748653500897664	1.0	0.8021582733812951	0.8902195608782436	0.9449063407793248	0.05509365922067511	0.6177669111654441	0.9034564958283672	0.7337850919651501
242	1.0	0.0	1.0	1.0	1.0	0.8025134649910234	0.19748653500897664	1.0	0.8021582733812951	0.8902195608782436	0.9449063407793248	0.05509365922067511	0.6177669111654441	0.9034564958283672	0.7337850919651501
242	1.0	0.0	1.0	1.0	1.0	0.8025134649910234	0.19748653500897664	1.0	0.8021582733812951	0.8902195608782436	0.9449063407793248	0.05509365922067511	0.6177669111654441	0.9034564958283672	0.7337850919651501
242	1.0	0.0	1.0	1.0	1.0	0.8025134649910234	0.19748653500897664	1.0	0.8021582733812951	0.8902195608782436	0.9449063407793248	0.05509365922067511	0.6177669111654441	0.9034564958283672	0.7337850919651501
242	1.0	0.0	1.0	1.0	1.0	0.8025134649910234	0.19748653500897664	1.0	0.8021582733812951	0.8902195608782436	0.9449063407793248	0.05509365922067511	0.6177669111654441	0.9034564958283672	0.7337850919651501
242	1.0	0.0	1.0	1.0	1.0	0.8025134649910234	0.19748653500897664	1.0	0.8021582733812951	0.8902195608782436	0.9449063407793248	0.05509365922067511	0.6177669111654441	0.9034564958283672	0.7337850919651501
242	1.0	0.0	1.0	1.0	1.0	0.8025134649910234	0.19748653500897664	1.0	0.8021582733812951	0.8902195608782436	0.9449063407793248	0.05509365922067511	0.6177669111654441	0.9034564958283672	0.7337850919651501
242	1.0	0.0	1.0	1.0	1.0	0.8025134649910234	0.19748653500897664	1.0	0.8021582733812951	0.8902195608782436	0.9449063407793248	0.05509365922067511	0.6177669111654441	0.9034564958283672	0.7337850919651501
242	1.0	0.0	1.0	1.0	1.0	0.8025134649910234	0.19748653500897664	1.0	0.8021582733812951	0.8902195608782436	0.9449063407793248	0.05509365922067511	0.6177669111654441	0.9034564958283672	0.7337850919651501
242	1.0	0.0	1.0	1.0	1.0	0.8025134649910234	0.19748653500897664	1.0	0.8021582733812951	0.8902195608782436	0.9449063407793248	0.05509365922067511	0.6177669111654441	0.9034564958283672	0.7337850919651501
242	1.0	0.0	1.0	1.0	1.0	0.8025134649910234	0.19748653500897664	1.0	0.8021582733812951	0.8902195608782436	0.9449063407793248	0.05509365922067511	0.6177669111654441	0.9034564958283672	0.7337850919651501
242	1.0	0.0	1.0	1.0	1.0	0.8025134649910234	0.19748653500897664	1.0	0.8021582733812951	0.8902195608782436	0.9449063407793248	0.05509365922067511	0.6177669111654441	0.9034564958283672	0.7337850919651501
242	1.0	0.0	1.0	1.0	1.0	0.8025134649910234	0.19748653500897664	1.0	0.8021582733812951	0.8902195608782436	0.9449063407793248	0.05509365922067511	0.6177669111654441	0.9034564958283672	0.7337850919651501
242	1.0	0.0	1.0	1.0	1.0	0.8025134649910234	0.19748653500897664	1.0	0.8021582733812951	0.8902195608782436	0.9449063407793248	0.05509365922067511	0.6177669111654441	0.9034564958283672	0.7337850919651501
242	1.0	0.0	1.0	1.0	1.0	0.8025134649910234	0.19748653500897664	1.0	0.8021582733812951	0.8902195608782436	0.9449063407793248	0.05509365922067511	0.6177669111654441	0.9034564958283672	0.7337850919651501
242	1.0	0.0	1.0	1.0	1.0	0.8025134649910234	0.19748653500897664	1.0	0.8021582733812951	0.8902195608782436	0.9449063407793248	0.05509365922067511	0.6177669111654441	0.9034564958283672	0.7337850919651501
242	1.0	0.0	1.0	1.0	1.0	0.8025134649910234	0.19748653500897664	1.0	0.8021582733812951	0.8902195608782436	0.9449063407793248	0.05509365922067511	0.6177669111654441	0.9034564958283672	0.7337850919651501
