# Supplementary material for: An Improved Hybrid Feature Selection Algorithm for Electric Charge Recovery Risk
Source: Hindawi journal article supplement (doi:10.1155/2020/8479341), 2020-08-28
Supplement: f1 [file 8479341.f1.zip › 8479341.f1/Experimental Results/201806/HPSO_SSM_SBS_results.csv]

features_num	Accuracy_high	Loss_high	Precission_high	Recall_high	F1_high	Accuracy_med	Loss_med	Precission_med	Recall_med	F1_med	Accuracy_low	Loss_low	Precission_low	Recall_low	F1_low
242	1	0	1	1	1	0.801075269	0.198924731	1	0.800718133	0.889332004	0.944700461	0.055299539	0.616449511	0.903341289	0.732817038
242	1	0	1	1	1	0.801075269	0.198924731	1	0.800718133	0.889332004	0.944700461	0.055299539	0.616449511	0.903341289	0.732817038
241	1	0	1	1	1	0.803956835	0.196043165	1	0.803603604	0.891108891	0.944911859	0.055088141	0.618078176	0.903571429	0.734042553
240	1	0	1	1	1	0.805405405	0.194594595	1	0.805054152	0.892	0.945117677	0.054882323	0.619396903	0.903686088	0.735009671
240	1	0	1	1	1	0.805405405	0.194594595	1	0.805054152	0.892	0.945117677	0.054882323	0.619396903	0.903686088	0.735009671
240	1	0	1	1	1	0.805405405	0.194594595	1	0.805054152	0.892	0.945117677	0.054882323	0.619396903	0.903686088	0.735009671
240	1	0	1	1	1	0.805405405	0.194594595	1	0.805054152	0.892	0.945117677	0.054882323	0.619396903	0.903686088	0.735009671
240	1	0	1	1	1	0.805405405	0.194594595	1	0.805054152	0.892	0.945117677	0.054882323	0.619396903	0.903686088	0.735009671
240	1	0	1	1	1	0.805405405	0.194594595	1	0.805054152	0.892	0.945117677	0.054882323	0.619396903	0.903686088	0.735009671
240	1	0	1	1	1	0.805405405	0.194594595	1	0.805054152	0.892	0.945117677	0.054882323	0.619396903	0.903686088	0.735009671
240	1	0	1	1	1	0.805405405	0.194594595	1	0.805054152	0.892	0.945117677	0.054882323	0.619396903	0.903686088	0.735009671
240	1	0	1	1	1	0.805405405	0.194594595	1	0.805054152	0.892	0.945117677	0.054882323	0.619396903	0.903686088	0.735009671
240	1	0	1	1	1	0.805405405	0.194594595	1	0.805054152	0.892	0.945117677	0.054882323	0.619396903	0.903686088	0.735009671
239	1	0	1	1	1	0.805405405	0.194594595	1	0.805054152	0.892	0.945217827	0.054782173	0.619902121	0.903686088	0.735365264
239	1	0	1	1	1	0.805405405	0.194594595	1	0.805054152	0.892	0.945217827	0.054782173	0.619902121	0.903686088	0.735365264
239	1	0	1	1	1	0.805405405	0.194594595	1	0.805054152	0.892	0.945217827	0.054782173	0.619902121	0.903686088	0.735365264
238	1	0	1	1	1	0.805405405	0.194594595	1	0.805054152	0.892	0.945217827	0.054782173	0.619902121	0.903686088	0.735365264
238	1	0	1	1	1	0.805405405	0.194594595	1	0.805054152	0.892	0.945217827	0.054782173	0.619902121	0.903686088	0.735365264
237	1	0	1	1	1	0.805405405	0.194594595	1	0.805054152	0.892	0.945317977	0.054682023	0.620408163	0.903686088	0.7357212
236	1	0	1	1	1	0.805405405	0.194594595	1	0.805054152	0.892	0.945317977	0.054682023	0.620408163	0.903686088	0.7357212
236	1	0	1	1	1	0.805405405	0.194594595	1	0.805054152	0.892	0.945317977	0.054682023	0.620408163	0.903686088	0.7357212
236	1	0	1	1	1	0.805405405	0.194594595	1	0.805054152	0.892	0.945317977	0.054682023	0.620408163	0.903686088	0.7357212
236	1	0	1	1	1	0.805405405	0.194594595	1	0.805054152	0.892	0.945317977	0.054682023	0.620408163	0.903686088	0.7357212
236	1	0	1	1	1	0.805405405	0.194594595	1	0.805054152	0.892	0.945317977	0.054682023	0.620408163	0.903686088	0.7357212
236	1	0	1	1	1	0.805405405	0.194594595	1	0.805054152	0.892	0.945317977	0.054682023	0.620408163	0.903686088	0.7357212
236	1	0	1	1	1	0.805405405	0.194594595	1	0.805054152	0.892	0.945317977	0.054682023	0.620408163	0.903686088	0.7357212
236	1	0	1	1	1	0.805405405	0.194594595	1	0.805054152	0.892	0.945317977	0.054682023	0.620408163	0.903686088	0.7357212
236	1	0	1	1	1	0.805405405	0.194594595	1	0.805054152	0.892	0.945317977	0.054682023	0.620408163	0.903686088	0.7357212
236	1	0	1	1	1	0.805405405	0.194594595	1	0.805054152	0.892	0.945317977	0.054682023	0.620408163	0.903686088	0.7357212
236	1	0	1	1	1	0.805405405	0.194594595	1	0.805054152	0.892	0.945317977	0.054682023	0.620408163	0.903686088	0.7357212
236	1	0	1	1	1	0.805405405	0.194594595	1	0.805054152	0.892	0.945317977	0.054682023	0.620408163	0.903686088	0.7357212
236	1	0	1	1	1	0.805405405	0.194594595	1	0.805054152	0.892	0.945317977	0.054682023	0.620408163	0.903686088	0.7357212
236	1	0	1	1	1	0.805405405	0.194594595	1	0.805054152	0.892	0.945317977	0.054682023	0.620408163	0.903686088	0.7357212
236	1	0	1	1	1	0.805405405	0.194594595	1	0.805054152	0.892	0.945317977	0.054682023	0.620408163	0.903686088	0.7357212
236	1	0	1	1	1	0.805405405	0.194594595	1	0.805054152	0.892	0.945317977	0.054682023	0.620408163	0.903686088	0.7357212
236	1	0	1	1	1	0.805405405	0.194594595	1	0.805054152	0.892	0.945317977	0.054682023	0.620408163	0.903686088	0.7357212
236	1	0	1	1	1	0.805405405	0.194594595	1	0.805054152	0.892	0.945317977	0.054682023	0.620408163	0.903686088	0.7357212
236	1	0	1	1	1	0.805405405	0.194594595	1	0.805054152	0.892	0.945317977	0.054682023	0.620408163	0.903686088	0.7357212
236	1	0	1	1	1	0.805405405	0.194594595	1	0.805054152	0.892	0.945317977	0.054682023	0.620408163	0.903686088	0.7357212
236	1	0	1	1	1	0.805405405	0.194594595	1	0.805054152	0.892	0.945317977	0.054682023	0.620408163	0.903686088	0.7357212
236	1	0	1	1	1	0.805405405	0.194594595	1	0.805054152	0.892	0.945317977	0.054682023	0.620408163	0.903686088	0.7357212
236	1	0	1	1	1	0.805405405	0.194594595	1	0.805054152	0.892	0.945317977	0.054682023	0.620408163	0.903686088	0.7357212
236	1	0	1	1	1	0.805405405	0.194594595	1	0.805054152	0.892	0.945317977	0.054682023	0.620408163	0.903686088	0.7357212
236	1	0	1	1	1	0.805405405	0.194594595	1	0.805054152	0.892	0.945317977	0.054682023	0.620408163	0.903686088	0.7357212
236	1	0	1	1	1	0.805405405	0.194594595	1	0.805054152	0.892	0.945317977	0.054682023	0.620408163	0.903686088	0.7357212
236	1	0	1	1	1	0.805405405	0.194594595	1	0.805054152	0.892	0.945317977	0.054682023	0.620408163	0.903686088	0.7357212
236	1	0	1	1	1	0.805405405	0.194594595	1	0.805054152	0.892	0.945317977	0.054682023	0.620408163	0.903686088	0.7357212
236	1	0	1	1	1	0.805405405	0.194594595	1	0.805054152	0.892	0.945317977	0.054682023	0.620408163	0.903686088	0.7357212
236	1	0	1	1	1	0.805405405	0.194594595	1	0.805054152	0.892	0.945317977	0.054682023	0.620408163	0.903686088	0.7357212
236	1	0	1	1	1	0.805405405	0.194594595	1	0.805054152	0.892	0.945317977	0.054682023	0.620408163	0.903686088	0.7357212
236	1	0	1	1	1	0.805405405	0.194594595	1	0.805054152	0.892	0.945317977	0.054682023	0.620408163	0.903686088	0.7357212
235	1	0	1	1	1	0.805405405	0.194594595	1	0.805054152	0.892	0.945317977	0.054682023	0.620408163	0.903686088	0.7357212
235	1	0	1	1	1	0.805405405	0.194594595	1	0.805054152	0.892	0.945317977	0.054682023	0.620408163	0.903686088	0.7357212
235	1	0	1	1	1	0.805405405	0.194594595	1	0.805054152	0.892	0.945317977	0.054682023	0.620408163	0.903686088	0.7357212
235	1	0	1	1	1	0.805405405	0.194594595	1	0.805054152	0.892	0.945317977	0.054682023	0.620408163	0.903686088	0.7357212
235	1	0	1	1	1	0.805405405	0.194594595	1	0.805054152	0.892	0.945317977	0.054682023	0.620408163	0.903686088	0.7357212
235	1	0	1	1	1	0.805405405	0.194594595	1	0.805054152	0.892	0.945317977	0.054682023	0.620408163	0.903686088	0.7357212
235	1	0	1	1	1	0.805405405	0.194594595	1	0.805054152	0.892	0.945317977	0.054682023	0.620408163	0.903686088	0.7357212
235	1	0	1	1	1	0.805405405	0.194594595	1	0.805054152	0.892	0.945317977	0.054682023	0.620408163	0.903686088	0.7357212
235	1	0	1	1	1	0.805405405	0.194594595	1	0.805054152	0.892	0.945317977	0.054682023	0.620408163	0.903686088	0.7357212
235	1	0	1	1	1	0.805405405	0.194594595	1	0.805054152	0.892	0.945317977	0.054682023	0.620408163	0.903686088	0.7357212
235	1	0	1	1	1	0.805405405	0.194594595	1	0.805054152	0.892	0.945317977	0.054682023	0.620408163	0.903686088	0.7357212
235	1	0	1	1	1	0.805405405	0.194594595	1	0.805054152	0.892	0.945317977	0.054682023	0.620408163	0.903686088	0.7357212
235	1	0	1	1	1	0.805405405	0.194594595	1	0.805054152	0.892	0.945317977	0.054682023	0.620408163	0.903686088	0.7357212
235	1	0	1	1	1	0.805405405	0.194594595	1	0.805054152	0.892	0.945317977	0.054682023	0.620408163	0.903686088	0.7357212
235	1	0	1	1	1	0.805405405	0.194594595	1	0.805054152	0.892	0.945317977	0.054682023	0.620408163	0.903686088	0.7357212
235	1	0	1	1	1	0.805405405	0.194594595	1	0.805054152	0.892	0.945317977	0.054682023	0.620408163	0.903686088	0.7357212
235	1	0	1	1	1	0.805405405	0.194594595	1	0.805054152	0.892	0.945317977	0.054682023	0.620408163	0.903686088	0.7357212
235	1	0	1	1	1	0.805405405	0.194594595	1	0.805054152	0.892	0.945317977	0.054682023	0.620408163	0.903686088	0.7357212
235	1	0	1	1	1	0.805405405	0.194594595	1	0.805054152	0.892	0.945317977	0.054682023	0.620408163	0.903686088	0.7357212
235	1	0	1	1	1	0.805405405	0.194594595	1	0.805054152	0.892	0.945317977	0.054682023	0.620408163	0.903686088	0.7357212
235	1	0	1	1	1	0.805405405	0.194594595	1	0.805054152	0.892	0.945317977	0.054682023	0.620408163	0.903686088	0.7357212
235	1	0	1	1	1	0.805405405	0.194594595	1	0.805054152	0.892	0.945317977	0.054682023	0.620408163	0.903686088	0.7357212
235	1	0	1	1	1	0.805405405	0.194594595	1	0.805054152	0.892	0.945317977	0.054682023	0.620408163	0.903686088	0.7357212
234	1	0	1	1	1	0.805405405	0.194594595	1	0.805054152	0.892	0.945317977	0.054682023	0.620408163	0.903686088	0.7357212
234	1	0	1	1	1	0.805405405	0.194594595	1	0.805054152	0.892	0.945317977	0.054682023	0.620408163	0.903686088	0.7357212
234	1	0	1	1	1	0.805405405	0.194594595	1	0.805054152	0.892	0.945317977	0.054682023	0.620408163	0.903686088	0.7357212
234	1	0	1	1	1	0.805405405	0.194594595	1	0.805054152	0.892	0.945317977	0.054682023	0.620408163	0.903686088	0.7357212
234	1	0	1	1	1	0.805405405	0.194594595	1	0.805054152	0.892	0.945317977	0.054682023	0.620408163	0.903686088	0.7357212
234	1	0	1	1	1	0.805405405	0.194594595	1	0.805054152	0.892	0.945317977	0.054682023	0.620408163	0.903686088	0.7357212
234	1	0	1	1	1	0.805405405	0.194594595	1	0.805054152	0.892	0.945317977	0.054682023	0.620408163	0.903686088	0.7357212
233	1	0	1	1	1	0.805405405	0.194594595	1	0.805054152	0.892	0.945317977	0.054682023	0.620408163	0.903686088	0.7357212
233	1	0	1	1	1	0.805405405	0.194594595	1	0.805054152	0.892	0.945317977	0.054682023	0.620408163	0.903686088	0.7357212
233	1	0	1	1	1	0.805405405	0.194594595	1	0.805054152	0.892	0.945317977	0.054682023	0.620408163	0.903686088	0.7357212
233	1	0	1	1	1	0.805405405	0.194594595	1	0.805054152	0.892	0.945317977	0.054682023	0.620408163	0.903686088	0.7357212
233	1	0	1	1	1	0.805405405	0.194594595	1	0.805054152	0.892	0.945317977	0.054682023	0.620408163	0.903686088	0.7357212
233	1	0	1	1	1	0.805405405	0.194594595	1	0.805054152	0.892	0.945317977	0.054682023	0.620408163	0.903686088	0.7357212
233	1	0	1	1	1	0.805405405	0.194594595	1	0.805054152	0.892	0.945317977	0.054682023	0.620408163	0.903686088	0.7357212
233	1	0	1	1	1	0.805405405	0.194594595	1	0.805054152	0.892	0.945317977	0.054682023	0.620408163	0.903686088	0.7357212
233	1	0	1	1	1	0.805405405	0.194594595	1	0.805054152	0.892	0.945317977	0.054682023	0.620408163	0.903686088	0.7357212
233	1	0	1	1	1	0.805405405	0.194594595	1	0.805054152	0.892	0.945317977	0.054682023	0.620408163	0.903686088	0.7357212
233	1	0	1	1	1	0.805405405	0.194594595	1	0.805054152	0.892	0.945317977	0.054682023	0.620408163	0.903686088	0.7357212
233	1	0	1	1	1	0.805405405	0.194594595	1	0.805054152	0.892	0.945317977	0.054682023	0.620408163	0.903686088	0.7357212
233	1	0	1	1	1	0.805405405	0.194594595	1	0.805054152	0.892	0.945317977	0.054682023	0.620408163	0.903686088	0.7357212
233	1	0	1	1	1	0.805405405	0.194594595	1	0.805054152	0.892	0.945317977	0.054682023	0.620408163	0.903686088	0.7357212
233	1	0	1	1	1	0.805405405	0.194594595	1	0.805054152	0.892	0.945317977	0.054682023	0.620408163	0.903686088	0.7357212
233	1	0	1	1	1	0.805405405	0.194594595	1	0.805054152	0.892	0.945317977	0.054682023	0.620408163	0.903686088	0.7357212
233	1	0	1	1	1	0.805405405	0.194594595	1	0.805054152	0.892	0.945317977	0.054682023	0.620408163	0.903686088	0.7357212
233	1	0	1	1	1	0.805405405	0.194594595	1	0.805054152	0.892	0.945317977	0.054682023	0.620408163	0.903686088	0.7357212
233	1	0	1	1	1	0.805405405	0.194594595	1	0.805054152	0.892	0.945317977	0.054682023	0.620408163	0.903686088	0.7357212
233	1	0	1	1	1	0.805405405	0.194594595	1	0.805054152	0.892	0.945317977	0.054682023	0.620408163	0.903686088	0.7357212
233	1	0	1	1	1	0.805405405	0.194594595	1	0.805054152	0.892	0.945317977	0.054682023	0.620408163	0.903686088	0.7357212
233	1	0	1	1	1	0.805405405	0.194594595	1	0.805054152	0.892	0.945317977	0.054682023	0.620408163	0.903686088	0.7357212
233	1	0	1	1	1	0.805405405	0.194594595	1	0.805054152	0.892	0.945317977	0.054682023	0.620408163	0.903686088	0.7357212
233	1	0	1	1	1	0.805405405	0.194594595	1	0.805054152	0.892	0.945317977	0.054682023	0.620408163	0.903686088	0.7357212
233	1	0	1	1	1	0.805405405	0.194594595	1	0.805054152	0.892	0.945317977	0.054682023	0.620408163	0.903686088	0.7357212
233	1	0	1	1	1	0.805405405	0.194594595	1	0.805054152	0.892	0.945317977	0.054682023	0.620408163	0.903686088	0.7357212
233	1	0	1	1	1	0.805405405	0.194594595	1	0.805054152	0.892	0.945317977	0.054682023	0.620408163	0.903686088	0.7357212
233	1	0	1	1	1	0.805405405	0.194594595	1	0.805054152	0.892	0.945317977	0.054682023	0.620408163	0.903686088	0.7357212
233	1	0	1	1	1	0.805405405	0.194594595	1	0.805054152	0.892	0.945317977	0.054682023	0.620408163	0.903686088	0.7357212
233	1	0	1	1	1	0.805405405	0.194594595	1	0.805054152	0.892	0.945317977	0.054682023	0.620408163	0.903686088	0.7357212
233	1	0	1	1	1	0.805405405	0.194594595	1	0.805054152	0.892	0.945317977	0.054682023	0.620408163	0.903686088	0.7357212
233	1	0	1	1	1	0.805405405	0.194594595	1	0.805054152	0.892	0.945317977	0.054682023	0.620408163	0.903686088	0.7357212
233	1	0	1	1	1	0.805405405	0.194594595	1	0.805054152	0.892	0.945317977	0.054682023	0.620408163	0.903686088	0.7357212
233	1	0	1	1	1	0.805405405	0.194594595	1	0.805054152	0.892	0.945317977	0.054682023	0.620408163	0.903686088	0.7357212
233	1	0	1	1	1	0.805405405	0.194594595	1	0.805054152	0.892	0.945317977	0.054682023	0.620408163	0.903686088	0.7357212
233	1	0	1	1	1	0.805405405	0.194594595	1	0.805054152	0.892	0.945317977	0.054682023	0.620408163	0.903686088	0.7357212
233	1	0	1	1	1	0.805405405	0.194594595	1	0.805054152	0.892	0.945317977	0.054682023	0.620408163	0.903686088	0.7357212
233	1	0	1	1	1	0.805405405	0.194594595	1	0.805054152	0.892	0.945317977	0.054682023	0.620408163	0.903686088	0.7357212
233	1	0	1	1	1	0.805405405	0.194594595	1	0.805054152	0.892	0.945317977	0.054682023	0.620408163	0.903686088	0.7357212
233	1	0	1	1	1	0.805405405	0.194594595	1	0.805054152	0.892	0.945317977	0.054682023	0.620408163	0.903686088	0.7357212
233	1	0	1	1	1	0.805405405	0.194594595	1	0.805054152	0.892	0.945317977	0.054682023	0.620408163	0.903686088	0.7357212
233	1	0	1	1	1	0.805405405	0.194594595	1	0.805054152	0.892	0.945317977	0.054682023	0.620408163	0.903686088	0.7357212
233	1	0	1	1	1	0.805405405	0.194594595	1	0.805054152	0.892	0.945317977	0.054682023	0.620408163	0.903686088	0.7357212
233	1	0	1	1	1	0.805405405	0.194594595	1	0.805054152	0.892	0.945317977	0.054682023	0.620408163	0.903686088	0.7357212
233	1	0	1	1	1	0.805405405	0.194594595	1	0.805054152	0.892	0.945317977	0.054682023	0.620408163	0.903686088	0.7357212
233	1	0	1	1	1	0.805405405	0.194594595	1	0.805054152	0.892	0.945317977	0.054682023	0.620408163	0.903686088	0.7357212
233	1	0	1	1	1	0.805405405	0.194594595	1	0.805054152	0.892	0.945317977	0.054682023	0.620408163	0.903686088	0.7357212
233	1	0	1	1	1	0.805405405	0.194594595	1	0.805054152	0.892	0.945317977	0.054682023	0.620408163	0.903686088	0.7357212
233	1	0	1	1	1	0.805405405	0.194594595	1	0.805054152	0.892	0.945317977	0.054682023	0.620408163	0.903686088	0.7357212
233	1	0	1	1	1	0.805405405	0.194594595	1	0.805054152	0.892	0.945317977	0.054682023	0.620408163	0.903686088	0.7357212
233	1	0	1	1	1	0.805405405	0.194594595	1	0.805054152	0.892	0.945317977	0.054682023	0.620408163	0.903686088	0.7357212
233	1	0	1	1	1	0.805405405	0.194594595	1	0.805054152	0.892	0.945317977	0.054682023	0.620408163	0.903686088	0.7357212
233	1	0	1	1	1	0.805405405	0.194594595	1	0.805054152	0.892	0.945317977	0.054682023	0.620408163	0.903686088	0.7357212
233	1	0	1	1	1	0.805405405	0.194594595	1	0.805054152	0.892	0.945317977	0.054682023	0.620408163	0.903686088	0.7357212
233	1	0	1	1	1	0.805405405	0.194594595	1	0.805054152	0.892	0.945317977	0.054682023	0.620408163	0.903686088	0.7357212
233	1	0	1	1	1	0.805405405	0.194594595	1	0.805054152	0.892	0.945317977	0.054682023	0.620408163	0.903686088	0.7357212
233	1	0	1	1	1	0.805405405	0.194594595	1	0.805054152	0.892	0.945317977	0.054682023	0.620408163	0.903686088	0.7357212
233	1	0	1	1	1	0.805405405	0.194594595	1	0.805054152	0.892	0.945317977	0.054682023	0.620408163	0.903686088	0.7357212
233	1	0	1	1	1	0.805405405	0.194594595	1	0.805054152	0.892	0.945317977	0.054682023	0.620408163	0.903686088	0.7357212
233	1	0	1	1	1	0.805405405	0.194594595	1	0.805054152	0.892	0.945317977	0.054682023	0.620408163	0.903686088	0.7357212
233	1	0	1	1	1	0.805405405	0.194594595	1	0.805054152	0.892	0.945317977	0.054682023	0.620408163	0.903686088	0.7357212
233	1	0	1	1	1	0.805405405	0.194594595	1	0.805054152	0.892	0.945317977	0.054682023	0.620408163	0.903686088	0.7357212
233	1	0	1	1	1	0.805405405	0.194594595	1	0.805054152	0.892	0.945317977	0.054682023	0.620408163	0.903686088	0.7357212
233	1	0	1	1	1	0.805405405	0.194594595	1	0.805054152	0.892	0.945317977	0.054682023	0.620408163	0.903686088	0.7357212
233	1	0	1	1	1	0.805405405	0.194594595	1	0.805054152	0.892	0.945317977	0.054682023	0.620408163	0.903686088	0.7357212
233	1	0	1	1	1	0.805405405	0.194594595	1	0.805054152	0.892	0.945317977	0.054682023	0.620408163	0.903686088	0.7357212
233	1	0	1	1	1	0.805405405	0.194594595	1	0.805054152	0.892	0.945317977	0.054682023	0.620408163	0.903686088	0.7357212
233	1	0	1	1	1	0.805405405	0.194594595	1	0.805054152	0.892	0.945317977	0.054682023	0.620408163	0.903686088	0.7357212
233	1	0	1	1	1	0.805405405	0.194594595	1	0.805054152	0.892	0.945317977	0.054682023	0.620408163	0.903686088	0.7357212
233	1	0	1	1	1	0.805405405	0.194594595	1	0.805054152	0.892	0.945317977	0.054682023	0.620408163	0.903686088	0.7357212
233	1	0	1	1	1	0.805405405	0.194594595	1	0.805054152	0.892	0.945317977	0.054682023	0.620408163	0.903686088	0.7357212
233	1	0	1	1	1	0.805405405	0.194594595	1	0.805054152	0.892	0.945317977	0.054682023	0.620408163	0.903686088	0.7357212
233	1	0	1	1	1	0.805405405	0.194594595	1	0.805054152	0.892	0.945317977	0.054682023	0.620408163	0.903686088	0.7357212
233	1	0	1	1	1	0.805405405	0.194594595	1	0.805054152	0.892	0.945317977	0.054682023	0.620408163	0.903686088	0.7357212
233	1	0	1	1	1	0.805405405	0.194594595	1	0.805054152	0.892	0.945317977	0.054682023	0.620408163	0.903686088	0.7357212
233	1	0	1	1	1	0.805405405	0.194594595	1	0.805054152	0.892	0.945317977	0.054682023	0.620408163	0.903686088	0.7357212
233	1	0	1	1	1	0.805405405	0.194594595	1	0.805054152	0.892	0.945317977	0.054682023	0.620408163	0.903686088	0.7357212
233	1	0	1	1	1	0.805405405	0.194594595	1	0.805054152	0.892	0.945317977	0.054682023	0.620408163	0.903686088	0.7357212
233	1	0	1	1	1	0.805405405	0.194594595	1	0.805054152	0.892	0.945317977	0.054682023	0.620408163	0.903686088	0.7357212
233	1	0	1	1	1	0.805405405	0.194594595	1	0.805054152	0.892	0.945317977	0.054682023	0.620408163	0.903686088	0.7357212
233	1	0	1	1	1	0.805405405	0.194594595	1	0.805054152	0.892	0.945317977	0.054682023	0.620408163	0.903686088	0.7357212
233	1	0	1	1	1	0.805405405	0.194594595	1	0.805054152	0.892	0.945317977	0.054682023	0.620408163	0.903686088	0.7357212
233	1	0	1	1	1	0.805405405	0.194594595	1	0.805054152	0.892	0.945317977	0.054682023	0.620408163	0.903686088	0.7357212
233	1	0	1	1	1	0.805405405	0.194594595	1	0.805054152	0.892	0.945317977	0.054682023	0.620408163	0.903686088	0.7357212
233	1	0	1	1	1	0.805405405	0.194594595	1	0.805054152	0.892	0.945317977	0.054682023	0.620408163	0.903686088	0.7357212
233	1	0	1	1	1	0.805405405	0.194594595	1	0.805054152	0.892	0.945317977	0.054682023	0.620408163	0.903686088	0.7357212
233	1	0	1	1	1	0.805405405	0.194594595	1	0.805054152	0.892	0.945317977	0.054682023	0.620408163	0.903686088	0.7357212
233	1	0	1	1	1	0.805405405	0.194594595	1	0.805054152	0.892	0.945317977	0.054682023	0.620408163	0.903686088	0.7357212
233	1	0	1	1	1	0.805405405	0.194594595	1	0.805054152	0.892	0.945317977	0.054682023	0.620408163	0.903686088	0.7357212
233	1	0	1	1	1	0.805405405	0.194594595	1	0.805054152	0.892	0.945317977	0.054682023	0.620408163	0.903686088	0.7357212
233	1	0	1	1	1	0.805405405	0.194594595	1	0.805054152	0.892	0.945317977	0.054682023	0.620408163	0.903686088	0.7357212
233	1	0	1	1	1	0.805405405	0.194594595	1	0.805054152	0.892	0.945317977	0.054682023	0.620408163	0.903686088	0.7357212
233	1	0	1	1	1	0.805405405	0.194594595	1	0.805054152	0.892	0.945317977	0.054682023	0.620408163	0.903686088	0.7357212
233	1	0	1	1	1	0.805405405	0.194594595	1	0.805054152	0.892	0.945317977	0.054682023	0.620408163	0.903686088	0.7357212
233	1	0	1	1	1	0.805405405	0.194594595	1	0.805054152	0.892	0.945317977	0.054682023	0.620408163	0.903686088	0.7357212
233	1	0	1	1	1	0.805405405	0.194594595	1	0.805054152	0.892	0.945317977	0.054682023	0.620408163	0.903686088	0.7357212
233	1	0	1	1	1	0.805405405	0.194594595	1	0.805054152	0.892	0.945317977	0.054682023	0.620408163	0.903686088	0.7357212
233	1	0	1	1	1	0.805405405	0.194594595	1	0.805054152	0.892	0.945317977	0.054682023	0.620408163	0.903686088	0.7357212
233	1	0	1	1	1	0.805405405	0.194594595	1	0.805054152	0.892	0.945317977	0.054682023	0.620408163	0.903686088	0.7357212
233	1	0	1	1	1	0.805405405	0.194594595	1	0.805054152	0.892	0.945317977	0.054682023	0.620408163	0.903686088	0.7357212
233	1	0	1	1	1	0.805405405	0.194594595	1	0.805054152	0.892	0.945317977	0.054682023	0.620408163	0.903686088	0.7357212
233	1	0	1	1	1	0.805405405	0.194594595	1	0.805054152	0.892	0.945317977	0.054682023	0.620408163	0.903686088	0.7357212
233	1	0	1	1	1	0.805405405	0.194594595	1	0.805054152	0.892	0.945317977	0.054682023	0.620408163	0.903686088	0.7357212
232	1	0	1	1	1	0.805405405	0.194594595	1	0.805054152	0.892	0.945317977	0.054682023	0.620408163	0.903686088	0.7357212
232	1	0	1	1	1	0.805405405	0.194594595	1	0.805054152	0.892	0.945317977	0.054682023	0.620408163	0.903686088	0.7357212
232	1	0	1	1	1	0.805405405	0.194594595	1	0.805054152	0.892	0.945317977	0.054682023	0.620408163	0.903686088	0.7357212
232	1	0	1	1	1	0.805405405	0.194594595	1	0.805054152	0.892	0.945317977	0.054682023	0.620408163	0.903686088	0.7357212
232	1	0	1	1	1	0.805405405	0.194594595	1	0.805054152	0.892	0.945317977	0.054682023	0.620408163	0.903686088	0.7357212
232	1	0	1	1	1	0.805405405	0.194594595	1	0.805054152	0.892	0.945317977	0.054682023	0.620408163	0.903686088	0.7357212
232	1	0	1	1	1	0.805405405	0.194594595	1	0.805054152	0.892	0.945317977	0.054682023	0.620408163	0.903686088	0.7357212
232	1	0	1	1	1	0.805405405	0.194594595	1	0.805054152	0.892	0.945317977	0.054682023	0.620408163	0.903686088	0.7357212
232	1	0	1	1	1	0.805405405	0.194594595	1	0.805054152	0.892	0.945317977	0.054682023	0.620408163	0.903686088	0.7357212
232	1	0	1	1	1	0.805405405	0.194594595	1	0.805054152	0.892	0.945317977	0.054682023	0.620408163	0.903686088	0.7357212
232	1	0	1	1	1	0.805405405	0.194594595	1	0.805054152	0.892	0.945317977	0.054682023	0.620408163	0.903686088	0.7357212
232	1	0	1	1	1	0.805405405	0.194594595	1	0.805054152	0.892	0.945317977	0.054682023	0.620408163	0.903686088	0.7357212
232	1	0	1	1	1	0.805405405	0.194594595	1	0.805054152	0.892	0.945317977	0.054682023	0.620408163	0.903686088	0.7357212
232	1	0	1	1	1	0.805405405	0.194594595	1	0.805054152	0.892	0.945317977	0.054682023	0.620408163	0.903686088	0.7357212
232	1	0	1	1	1	0.805405405	0.194594595	1	0.805054152	0.892	0.945317977	0.054682023	0.620408163	0.903686088	0.7357212
232	1	0	1	1	1	0.805405405	0.194594595	1	0.805054152	0.892	0.945317977	0.054682023	0.620408163	0.903686088	0.7357212
232	1	0	1	1	1	0.805405405	0.194594595	1	0.805054152	0.892	0.945317977	0.054682023	0.620408163	0.903686088	0.7357212
232	1	0	1	1	1	0.805405405	0.194594595	1	0.805054152	0.892	0.945317977	0.054682023	0.620408163	0.903686088	0.7357212
232	1	0	1	1	1	0.805405405	0.194594595	1	0.805054152	0.892	0.945317977	0.054682023	0.620408163	0.903686088	0.7357212
232	1	0	1	1	1	0.805405405	0.194594595	1	0.805054152	0.892	0.945317977	0.054682023	0.620408163	0.903686088	0.7357212
232	1	0	1	1	1	0.805405405	0.194594595	1	0.805054152	0.892	0.945317977	0.054682023	0.620408163	0.903686088	0.7357212
232	1	0	1	1	1	0.805405405	0.194594595	1	0.805054152	0.892	0.945317977	0.054682023	0.620408163	0.903686088	0.7357212
232	1	0	1	1	1	0.805405405	0.194594595	1	0.805054152	0.892	0.945317977	0.054682023	0.620408163	0.903686088	0.7357212
232	1	0	1	1	1	0.805405405	0.194594595	1	0.805054152	0.892	0.945317977	0.054682023	0.620408163	0.903686088	0.7357212
232	1	0	1	1	1	0.805405405	0.194594595	1	0.805054152	0.892	0.945317977	0.054682023	0.620408163	0.903686088	0.7357212
232	1	0	1	1	1	0.805405405	0.194594595	1	0.805054152	0.892	0.945317977	0.054682023	0.620408163	0.903686088	0.7357212
232	1	0	1	1	1	0.805405405	0.194594595	1	0.805054152	0.892	0.945317977	0.054682023	0.620408163	0.903686088	0.7357212
232	1	0	1	1	1	0.805405405	0.194594595	1	0.805054152	0.892	0.945317977	0.054682023	0.620408163	0.903686088	0.7357212
232	1	0	1	1	1	0.805405405	0.194594595	1	0.805054152	0.892	0.945317977	0.054682023	0.620408163	0.903686088	0.7357212
232	1	0	1	1	1	0.805405405	0.194594595	1	0.805054152	0.892	0.945317977	0.054682023	0.620408163	0.903686088	0.7357212
232	1	0	1	1	1	0.805405405	0.194594595	1	0.805054152	0.892	0.945317977	0.054682023	0.620408163	0.903686088	0.7357212
232	1	0	1	1	1	0.805405405	0.194594595	1	0.805054152	0.892	0.945317977	0.054682023	0.620408163	0.903686088	0.7357212
232	1	0	1	1	1	0.805405405	0.194594595	1	0.805054152	0.892	0.945317977	0.054682023	0.620408163	0.903686088	0.7357212
232	1	0	1	1	1	0.805405405	0.194594595	1	0.805054152	0.892	0.945317977	0.054682023	0.620408163	0.903686088	0.7357212
231	1	0	1	1	1	0.805405405	0.194594595	1	0.805054152	0.892	0.945317977	0.054682023	0.620408163	0.903686088	0.7357212
231	1	0	1	1	1	0.805405405	0.194594595	1	0.805054152	0.892	0.945317977	0.054682023	0.620408163	0.903686088	0.7357212
231	1	0	1	1	1	0.805405405	0.194594595	1	0.805054152	0.892	0.945317977	0.054682023	0.620408163	0.903686088	0.7357212
231	1	0	1	1	1	0.805405405	0.194594595	1	0.805054152	0.892	0.945317977	0.054682023	0.620408163	0.903686088	0.7357212
231	1	0	1	1	1	0.805405405	0.194594595	1	0.805054152	0.892	0.945317977	0.054682023	0.620408163	0.903686088	0.7357212
231	1	0	1	1	1	0.805405405	0.194594595	1	0.805054152	0.892	0.945317977	0.054682023	0.620408163	0.903686088	0.7357212
231	1	0	1	1	1	0.805405405	0.194594595	1	0.805054152	0.892	0.945317977	0.054682023	0.620408163	0.903686088	0.7357212
231	1	0	1	1	1	0.805405405	0.194594595	1	0.805054152	0.892	0.945317977	0.054682023	0.620408163	0.903686088	0.7357212
231	1	0	1	1	1	0.805405405	0.194594595	1	0.805054152	0.892	0.945317977	0.054682023	0.620408163	0.903686088	0.7357212
231	1	0	1	1	1	0.805405405	0.194594595	1	0.805054152	0.892	0.945317977	0.054682023	0.620408163	0.903686088	0.7357212
231	1	0	1	1	1	0.805405405	0.194594595	1	0.805054152	0.892	0.945317977	0.054682023	0.620408163	0.903686088	0.7357212
231	1	0	1	1	1	0.805405405	0.194594595	1	0.805054152	0.892	0.945317977	0.054682023	0.620408163	0.903686088	0.7357212
231	1	0	1	1	1	0.805405405	0.194594595	1	0.805054152	0.892	0.945317977	0.054682023	0.620408163	0.903686088	0.7357212
230	1	0	1	1	1	0.805405405	0.194594595	1	0.805054152	0.892	0.945317977	0.054682023	0.620408163	0.903686088	0.7357212
230	1	0	1	1	1	0.805405405	0.194594595	1	0.805054152	0.892	0.945317977	0.054682023	0.620408163	0.903686088	0.7357212
230	1	0	1	1	1	0.805405405	0.194594595	1	0.805054152	0.892	0.945317977	0.054682023	0.620408163	0.903686088	0.7357212
230	1	0	1	1	1	0.805405405	0.194594595	1	0.805054152	0.892	0.945317977	0.054682023	0.620408163	0.903686088	0.7357212
230	1	0	1	1	1	0.805405405	0.194594595	1	0.805054152	0.892	0.945317977	0.054682023	0.620408163	0.903686088	0.7357212
230	1	0	1	1	1	0.805405405	0.194594595	1	0.805054152	0.892	0.945317977	0.054682023	0.620408163	0.903686088	0.7357212
230	1	0	1	1	1	0.805405405	0.194594595	1	0.805054152	0.892	0.945317977	0.054682023	0.620408163	0.903686088	0.7357212
230	1	0	1	1	1	0.805405405	0.194594595	1	0.805054152	0.892	0.945317977	0.054682023	0.620408163	0.903686088	0.7357212
230	1	0	1	1	1	0.805405405	0.194594595	1	0.805054152	0.892	0.945317977	0.054682023	0.620408163	0.903686088	0.7357212
230	1	0	1	1	1	0.805405405	0.194594595	1	0.805054152	0.892	0.945317977	0.054682023	0.620408163	0.903686088	0.7357212
230	1	0	1	1	1	0.805405405	0.194594595	1	0.805054152	0.892	0.945317977	0.054682023	0.620408163	0.903686088	0.7357212
230	1	0	1	1	1	0.805405405	0.194594595	1	0.805054152	0.892	0.945317977	0.054682023	0.620408163	0.903686088	0.7357212
230	1	0	1	1	1	0.805405405	0.194594595	1	0.805054152	0.892	0.945317977	0.054682023	0.620408163	0.903686088	0.7357212
230	1	0	1	1	1	0.805405405	0.194594595	1	0.805054152	0.892	0.945317977	0.054682023	0.620408163	0.903686088	0.7357212
230	1	0	1	1	1	0.805405405	0.194594595	1	0.805054152	0.892	0.945317977	0.054682023	0.620408163	0.903686088	0.7357212
230	1	0	1	1	1	0.805405405	0.194594595	1	0.805054152	0.892	0.945317977	0.054682023	0.620408163	0.903686088	0.7357212
230	1	0	1	1	1	0.805405405	0.194594595	1	0.805054152	0.892	0.945317977	0.054682023	0.620408163	0.903686088	0.7357212
230	1	0	1	1	1	0.805405405	0.194594595	1	0.805054152	0.892	0.945317977	0.054682023	0.620408163	0.903686088	0.7357212
230	1	0	1	1	1	0.805405405	0.194594595	1	0.805054152	0.892	0.945317977	0.054682023	0.620408163	0.903686088	0.7357212
230	1	0	1	1	1	0.805405405	0.194594595	1	0.805054152	0.892	0.945317977	0.054682023	0.620408163	0.903686088	0.7357212
230	1	0	1	1	1	0.805405405	0.194594595	1	0.805054152	0.892	0.945317977	0.054682023	0.620408163	0.903686088	0.7357212
229	1	0	1	1	1	0.805405405	0.194594595	1	0.805054152	0.892	0.945317977	0.054682023	0.620408163	0.903686088	0.7357212
229	1	0	1	1	1	0.805405405	0.194594595	1	0.805054152	0.892	0.945317977	0.054682023	0.620408163	0.903686088	0.7357212
229	1	0	1	1	1	0.805405405	0.194594595	1	0.805054152	0.892	0.945317977	0.054682023	0.620408163	0.903686088	0.7357212
229	1	0	1	1	1	0.805405405	0.194594595	1	0.805054152	0.892	0.945317977	0.054682023	0.620408163	0.903686088	0.7357212
229	1	0	1	1	1	0.805405405	0.194594595	1	0.805054152	0.892	0.945317977	0.054682023	0.620408163	0.903686088	0.7357212
229	1	0	1	1	1	0.805405405	0.194594595	1	0.805054152	0.892	0.945317977	0.054682023	0.620408163	0.903686088	0.7357212
229	1	0	1	1	1	0.805405405	0.194594595	1	0.805054152	0.892	0.945317977	0.054682023	0.620408163	0.903686088	0.7357212
229	1	0	1	1	1	0.805405405	0.194594595	1	0.805054152	0.892	0.945317977	0.054682023	0.620408163	0.903686088	0.7357212
229	1	0	1	1	1	0.805405405	0.194594595	1	0.805054152	0.892	0.945317977	0.054682023	0.620408163	0.903686088	0.7357212
229	1	0	1	1	1	0.805405405	0.194594595	1	0.805054152	0.892	0.945317977	0.054682023	0.620408163	0.903686088	0.7357212
229	1	0	1	1	1	0.805405405	0.194594595	1	0.805054152	0.892	0.945317977	0.054682023	0.620408163	0.903686088	0.7357212
229	1	0	1	1	1	0.805405405	0.194594595	1	0.805054152	0.892	0.945317977	0.054682023	0.620408163	0.903686088	0.7357212
229	1	0	1	1	1	0.805405405	0.194594595	1	0.805054152	0.892	0.945317977	0.054682023	0.620408163	0.903686088	0.7357212
229	1	0	1	1	1	0.805405405	0.194594595	1	0.805054152	0.892	0.945317977	0.054682023	0.620408163	0.903686088	0.7357212
229	1	0	1	1	1	0.805405405	0.194594595	1	0.805054152	0.892	0.945317977	0.054682023	0.620408163	0.903686088	0.7357212
228	1	0	1	1	1	0.80910683	0.19089317	1	0.80877193	0.894277401	0.945631458	0.054368542	0.615510204	0.913939394	0.735609756
227	1	0	1	1	1	0.810954064	0.189045936	1	0.810619469	0.89540567	0.945758973	0.054241027	0.618152085	0.910843373	0.736483195
226	1	0	1	1	1	0.812720848	0.187279152	1	0.812389381	0.896484375	0.945658713	0.054341287	0.617647059	0.910843373	0.736124635
226	1	0	1	1	1	0.812720848	0.187279152	1	0.812389381	0.896484375	0.945658713	0.054341287	0.617647059	0.910843373	0.736124635
226	1	0	1	1	1	0.812720848	0.187279152	1	0.812389381	0.896484375	0.945658713	0.054341287	0.617647059	0.910843373	0.736124635
225	1	0	1	1	1	0.815275311	0.184724689	1	0.814946619	0.898039216	0.946176205	0.053823795	0.62111293	0.911164466	0.738686131
225	1	0	1	1	1	0.815275311	0.184724689	1	0.814946619	0.898039216	0.946176205	0.053823795	0.62111293	0.911164466	0.738686131
225	1	0	1	1	1	0.815275311	0.184724689	1	0.814946619	0.898039216	0.946176205	0.053823795	0.62111293	0.911164466	0.738686131
225	1	0	1	1	1	0.815275311	0.184724689	1	0.814946619	0.898039216	0.946176205	0.053823795	0.62111293	0.911164466	0.738686131
225	1	0	1	1	1	0.815275311	0.184724689	1	0.814946619	0.898039216	0.946176205	0.053823795	0.62111293	0.911164466	0.738686131
225	1	0	1	1	1	0.815275311	0.184724689	1	0.814946619	0.898039216	0.946176205	0.053823795	0.62111293	0.911164466	0.738686131
225	1	0	1	1	1	0.815275311	0.184724689	1	0.814946619	0.898039216	0.946176205	0.053823795	0.62111293	0.911164466	0.738686131
225	1	0	1	1	1	0.815275311	0.184724689	1	0.814946619	0.898039216	0.946176205	0.053823795	0.62111293	0.911164466	0.738686131
225	1	0	1	1	1	0.815275311	0.184724689	1	0.814946619	0.898039216	0.946176205	0.053823795	0.62111293	0.911164466	0.738686131
225	1	0	1	1	1	0.815275311	0.184724689	1	0.814946619	0.898039216	0.946176205	0.053823795	0.62111293	0.911164466	0.738686131
225	1	0	1	1	1	0.815275311	0.184724689	1	0.814946619	0.898039216	0.946176205	0.053823795	0.62111293	0.911164466	0.738686131
225	1	0	1	1	1	0.815275311	0.184724689	1	0.814946619	0.898039216	0.946176205	0.053823795	0.62111293	0.911164466	0.738686131
225	1	0	1	1	1	0.815275311	0.184724689	1	0.814946619	0.898039216	0.946176205	0.053823795	0.62111293	0.911164466	0.738686131
225	1	0	1	1	1	0.815275311	0.184724689	1	0.814946619	0.898039216	0.946176205	0.053823795	0.62111293	0.911164466	0.738686131
225	1	0	1	1	1	0.815275311	0.184724689	1	0.814946619	0.898039216	0.946176205	0.053823795	0.62111293	0.911164466	0.738686131
225	1	0	1	1	1	0.815275311	0.184724689	1	0.814946619	0.898039216	0.946176205	0.053823795	0.62111293	0.911164466	0.738686131
225	1	0	1	1	1	0.815275311	0.184724689	1	0.814946619	0.898039216	0.946176205	0.053823795	0.62111293	0.911164466	0.738686131
225	1	0	1	1	1	0.815275311	0.184724689	1	0.814946619	0.898039216	0.946176205	0.053823795	0.62111293	0.911164466	0.738686131
225	1	0	1	1	1	0.815275311	0.184724689	1	0.814946619	0.898039216	0.946176205	0.053823795	0.62111293	0.911164466	0.738686131
225	1	0	1	1	1	0.815275311	0.184724689	1	0.814946619	0.898039216	0.946176205	0.053823795	0.62111293	0.911164466	0.738686131
225	1	0	1	1	1	0.815275311	0.184724689	1	0.814946619	0.898039216	0.946176205	0.053823795	0.62111293	0.911164466	0.738686131
225	1	0	1	1	1	0.815275311	0.184724689	1	0.814946619	0.898039216	0.946176205	0.053823795	0.62111293	0.911164466	0.738686131
225	1	0	1	1	1	0.815275311	0.184724689	1	0.814946619	0.898039216	0.946176205	0.053823795	0.62111293	0.911164466	0.738686131
224	1	0	1	1	1	0.770065076	0.229934924	1	0.770065076	0.870098039	0.963587658	0.036412342	0.745880312	0.920770878	0.824149497
224	1	0	1	1	1	0.770065076	0.229934924	1	0.770065076	0.870098039	0.963587658	0.036412342	0.745880312	0.920770878	0.824149497
224	1	0	1	1	1	0.770065076	0.229934924	1	0.770065076	0.870098039	0.963587658	0.036412342	0.745880312	0.920770878	0.824149497
224	1	0	1	1	1	0.770065076	0.229934924	1	0.770065076	0.870098039	0.963587658	0.036412342	0.745880312	0.920770878	0.824149497
224	1	0	1	1	1	0.770065076	0.229934924	1	0.770065076	0.870098039	0.963587658	0.036412342	0.745880312	0.920770878	0.824149497
224	1	0	1	1	1	0.770065076	0.229934924	1	0.770065076	0.870098039	0.963587658	0.036412342	0.745880312	0.920770878	0.824149497
224	1	0	1	1	1	0.770065076	0.229934924	1	0.770065076	0.870098039	0.963587658	0.036412342	0.745880312	0.920770878	0.824149497
224	1	0	1	1	1	0.770065076	0.229934924	1	0.770065076	0.870098039	0.963587658	0.036412342	0.745880312	0.920770878	0.824149497
224	1	0	1	1	1	0.770065076	0.229934924	1	0.770065076	0.870098039	0.963587658	0.036412342	0.745880312	0.920770878	0.824149497
224	1	0	1	1	1	0.770065076	0.229934924	1	0.770065076	0.870098039	0.963587658	0.036412342	0.745880312	0.920770878	0.824149497
224	1	0	1	1	1	0.770065076	0.229934924	1	0.770065076	0.870098039	0.963587658	0.036412342	0.745880312	0.920770878	0.824149497
224	1	0	1	1	1	0.770065076	0.229934924	1	0.770065076	0.870098039	0.963587658	0.036412342	0.745880312	0.920770878	0.824149497
223	1	0	1	1	1	0.766884532	0.233115468	1	0.766884532	0.868064118	0.965380419	0.034619581	0.7572305	0.923076923	0.831969186
222	1	0	1	1	1	0.768558952	0.231441048	1	0.768558952	0.869135802	0.965483039	0.034516961	0.757655293	0.924226254	0.832692308
222	1	0	1	1	1	0.768558952	0.231441048	1	0.768558952	0.869135802	0.965483039	0.034516961	0.757655293	0.924226254	0.832692308
221	1	0	1	1	1	0.769565217	0.230434783	1	0.769565217	0.86977887	0.96547619	0.03452381	0.756780402	0.92513369	0.83253128
221	1	0	1	1	1	0.769565217	0.230434783	1	0.769565217	0.86977887	0.96547619	0.03452381	0.756780402	0.92513369	0.83253128
220	1	0	1	1	1	0.769063181	0.230936819	1	0.769063181	0.869458128	0.965578812	0.034421188	0.758106924	0.924145299	0.832932114
219	1	0	1	1	1	0.770562771	0.229437229	1	0.770562771	0.870415648	0.965469339	0.034530661	0.755905512	0.926045016	0.832369942
219	1	0	1	1	1	0.770562771	0.229437229	1	0.770562771	0.870415648	0.965469339	0.034530661	0.755905512	0.926045016	0.832369942
218	1	0	1	1	1	0.770742358	0.229257642	1	0.770742358	0.87053021	0.965483039	0.034516961	0.757655293	0.924226254	0.832692308
218	1	0	1	1	1	0.770742358	0.229257642	1	0.770742358	0.87053021	0.965483039	0.034516961	0.757655293	0.924226254	0.832692308
217	1	0	1	1	1	0.776053215	0.223946785	1	0.776053215	0.873907615	0.96540787	0.03459213	0.759825328	0.921610169	0.832934418
217	1	0	1	1	1	0.776053215	0.223946785	1	0.776053215	0.873907615	0.96540787	0.03459213	0.759825328	0.921610169	0.832934418
217	1	0	1	1	1	0.776053215	0.223946785	1	0.776053215	0.873907615	0.96540787	0.03459213	0.759825328	0.921610169	0.832934418
217	1	0	1	1	1	0.776053215	0.223946785	1	0.776053215	0.873907615	0.96540787	0.03459213	0.759825328	0.921610169	0.832934418
217	1	0	1	1	1	0.776053215	0.223946785	1	0.776053215	0.873907615	0.96540787	0.03459213	0.759825328	0.921610169	0.832934418
216	1	0	1	1	1	0.776286353	0.223713647	1	0.776286353	0.874055416	0.965421579	0.034578421	0.761115955	0.920886076	0.833412888
216	1	0	1	1	1	0.776286353	0.223713647	1	0.776286353	0.874055416	0.965421579	0.034578421	0.761115955	0.920886076	0.833412888
216	1	0	1	1	1	0.776286353	0.223713647	1	0.776286353	0.874055416	0.965421579	0.034578421	0.761115955	0.920886076	0.833412888
216	1	0	1	1	1	0.776286353	0.223713647	1	0.776286353	0.874055416	0.965421579	0.034578421	0.761115955	0.920886076	0.833412888
215	1	0	1	1	1	0.781038375	0.218961625	1	0.781038375	0.877059569	0.965633356	0.034366644	0.763272411	0.921218487	0.834840552
215	1	0	1	1	1	0.781038375	0.218961625	1	0.781038375	0.877059569	0.965633356	0.034366644	0.763272411	0.921218487	0.834840552
215	1	0	1	1	1	0.781038375	0.218961625	1	0.781038375	0.877059569	0.965633356	0.034366644	0.763272411	0.921218487	0.834840552
215	1	0	1	1	1	0.781038375	0.218961625	1	0.781038375	0.877059569	0.965633356	0.034366644	0.763272411	0.921218487	0.834840552
215	1	0	1	1	1	0.781038375	0.218961625	1	0.781038375	0.877059569	0.965633356	0.034366644	0.763272411	0.921218487	0.834840552
215	1	0	1	1	1	0.781038375	0.218961625	1	0.781038375	0.877059569	0.965633356	0.034366644	0.763272411	0.921218487	0.834840552
215	1	0	1	1	1	0.781038375	0.218961625	1	0.781038375	0.877059569	0.965633356	0.034366644	0.763272411	0.921218487	0.834840552
215	1	0	1	1	1	0.781038375	0.218961625	1	0.781038375	0.877059569	0.965633356	0.034366644	0.763272411	0.921218487	0.834840552
215	1	0	1	1	1	0.781038375	0.218961625	1	0.781038375	0.877059569	0.965633356	0.034366644	0.763272411	0.921218487	0.834840552
215	1	0	1	1	1	0.781038375	0.218961625	1	0.781038375	0.877059569	0.965633356	0.034366644	0.763272411	0.921218487	0.834840552
215	1	0	1	1	1	0.781038375	0.218961625	1	0.781038375	0.877059569	0.965633356	0.034366644	0.763272411	0.921218487	0.834840552
215	1	0	1	1	1	0.781038375	0.218961625	1	0.781038375	0.877059569	0.965633356	0.034366644	0.763272411	0.921218487	0.834840552
214	1	0	1	1	1	0.801295896	0.198704104	1	0.801295896	0.889688249	0.962985015	0.037014985	0.73706531	0.932403433	0.82330649
214	1	0	1	1	1	0.801295896	0.198704104	1	0.801295896	0.889688249	0.962985015	0.037014985	0.73706531	0.932403433	0.82330649
213	1	0	1	1	1	0.801724138	0.198275862	1	0.801724138	0.889952153	0.963080588	0.036919412	0.73706531	0.933404941	0.823696682
212	1	0	1	1	1	0.799136069	0.200863931	1	0.799136069	0.888355342	0.963580431	0.036419569	0.740835465	0.932403433	0.825653207
212	1	0	1	1	1	0.799136069	0.200863931	1	0.799136069	0.888355342	0.963580431	0.036419569	0.740835465	0.932403433	0.825653207
212	1	0	1	1	1	0.799136069	0.200863931	1	0.799136069	0.888355342	0.963580431	0.036419569	0.740835465	0.932403433	0.825653207
212	1	0	1	1	1	0.799136069	0.200863931	1	0.799136069	0.888355342	0.963580431	0.036419569	0.740835465	0.932403433	0.825653207
212	1	0	1	1	1	0.799136069	0.200863931	1	0.799136069	0.888355342	0.963580431	0.036419569	0.740835465	0.932403433	0.825653207
212	1	0	1	1	1	0.799136069	0.200863931	1	0.799136069	0.888355342	0.963580431	0.036419569	0.740835465	0.932403433	0.825653207
211	1	0	1	1	1	0.799136069	0.200863931	1	0.799136069	0.888355342	0.963580431	0.036419569	0.740835465	0.932403433	0.825653207
210	1	0	1	1	1	0.799136069	0.200863931	1	0.799136069	0.888355342	0.963679667	0.036320333	0.741467577	0.932403433	0.826045627
210	1	0	1	1	1	0.799136069	0.200863931	1	0.799136069	0.888355342	0.963679667	0.036320333	0.741467577	0.932403433	0.826045627
210	1	0	1	1	1	0.799136069	0.200863931	1	0.799136069	0.888355342	0.963679667	0.036320333	0.741467577	0.932403433	0.826045627
210	1	0	1	1	1	0.799136069	0.200863931	1	0.799136069	0.888355342	0.963679667	0.036320333	0.741467577	0.932403433	0.826045627
210	1	0	1	1	1	0.799136069	0.200863931	1	0.799136069	0.888355342	0.963679667	0.036320333	0.741467577	0.932403433	0.826045627
210	1	0	1	1	1	0.799136069	0.200863931	1	0.799136069	0.888355342	0.963679667	0.036320333	0.741467577	0.932403433	0.826045627
210	1	0	1	1	1	0.799136069	0.200863931	1	0.799136069	0.888355342	0.963679667	0.036320333	0.741467577	0.932403433	0.826045627
209	1	0	1	1	1	0.799136069	0.200863931	1	0.799136069	0.888355342	0.963679667	0.036320333	0.741467577	0.932403433	0.826045627
209	1	0	1	1	1	0.799136069	0.200863931	1	0.799136069	0.888355342	0.963679667	0.036320333	0.741467577	0.932403433	0.826045627
209	1	0	1	1	1	0.799136069	0.200863931	1	0.799136069	0.888355342	0.963679667	0.036320333	0.741467577	0.932403433	0.826045627
209	1	0	1	1	1	0.799136069	0.200863931	1	0.799136069	0.888355342	0.963679667	0.036320333	0.741467577	0.932403433	0.826045627
209	1	0	1	1	1	0.799136069	0.200863931	1	0.799136069	0.888355342	0.963679667	0.036320333	0.741467577	0.932403433	0.826045627
209	1	0	1	1	1	0.799136069	0.200863931	1	0.799136069	0.888355342	0.963679667	0.036320333	0.741467577	0.932403433	0.826045627
209	1	0	1	1	1	0.799136069	0.200863931	1	0.799136069	0.888355342	0.963679667	0.036320333	0.741467577	0.932403433	0.826045627
209	1	0	1	1	1	0.799136069	0.200863931	1	0.799136069	0.888355342	0.963679667	0.036320333	0.741467577	0.932403433	0.826045627
209	1	0	1	1	1	0.799136069	0.200863931	1	0.799136069	0.888355342	0.963679667	0.036320333	0.741467577	0.932403433	0.826045627
209	1	0	1	1	1	0.799136069	0.200863931	1	0.799136069	0.888355342	0.963679667	0.036320333	0.741467577	0.932403433	0.826045627
208	1	0	1	1	1	0.799136069	0.200863931	1	0.799136069	0.888355342	0.963679667	0.036320333	0.741467577	0.932403433	0.826045627
208	1	0	1	1	1	0.799136069	0.200863931	1	0.799136069	0.888355342	0.963679667	0.036320333	0.741467577	0.932403433	0.826045627
208	1	0	1	1	1	0.799136069	0.200863931	1	0.799136069	0.888355342	0.963679667	0.036320333	0.741467577	0.932403433	0.826045627
208	1	0	1	1	1	0.799136069	0.200863931	1	0.799136069	0.888355342	0.963679667	0.036320333	0.741467577	0.932403433	0.826045627
208	1	0	1	1	1	0.799136069	0.200863931	1	0.799136069	0.888355342	0.963679667	0.036320333	0.741467577	0.932403433	0.826045627
208	1	0	1	1	1	0.799136069	0.200863931	1	0.799136069	0.888355342	0.963679667	0.036320333	0.741467577	0.932403433	0.826045627
208	1	0	1	1	1	0.799136069	0.200863931	1	0.799136069	0.888355342	0.963679667	0.036320333	0.741467577	0.932403433	0.826045627
208	1	0	1	1	1	0.799136069	0.200863931	1	0.799136069	0.888355342	0.963679667	0.036320333	0.741467577	0.932403433	0.826045627
208	1	0	1	1	1	0.799136069	0.200863931	1	0.799136069	0.888355342	0.963679667	0.036320333	0.741467577	0.932403433	0.826045627
208	1	0	1	1	1	0.799136069	0.200863931	1	0.799136069	0.888355342	0.963679667	0.036320333	0.741467577	0.932403433	0.826045627
208	1	0	1	1	1	0.799136069	0.200863931	1	0.799136069	0.888355342	0.963679667	0.036320333	0.741467577	0.932403433	0.826045627
208	1	0	1	1	1	0.799136069	0.200863931	1	0.799136069	0.888355342	0.963679667	0.036320333	0.741467577	0.932403433	0.826045627
208	1	0	1	1	1	0.799136069	0.200863931	1	0.799136069	0.888355342	0.963679667	0.036320333	0.741467577	0.932403433	0.826045627
208	1	0	1	1	1	0.799136069	0.200863931	1	0.799136069	0.888355342	0.963679667	0.036320333	0.741467577	0.932403433	0.826045627
208	1	0	1	1	1	0.799136069	0.200863931	1	0.799136069	0.888355342	0.963679667	0.036320333	0.741467577	0.932403433	0.826045627
208	1	0	1	1	1	0.799136069	0.200863931	1	0.799136069	0.888355342	0.963679667	0.036320333	0.741467577	0.932403433	0.826045627
207	1	0	1	1	1	0.797413793	0.202586207	1	0.797413793	0.887290168	0.964767765	0.035232235	0.747848537	0.933404941	0.830387004
207	1	0	1	1	1	0.797413793	0.202586207	1	0.797413793	0.887290168	0.964767765	0.035232235	0.747848537	0.933404941	0.830387004
207	1	0	1	1	1	0.797413793	0.202586207	1	0.797413793	0.887290168	0.964767765	0.035232235	0.747848537	0.933404941	0.830387004
207	1	0	1	1	1	0.797413793	0.202586207	1	0.797413793	0.887290168	0.964767765	0.035232235	0.747848537	0.933404941	0.830387004
207	1	0	1	1	1	0.797413793	0.202586207	1	0.797413793	0.887290168	0.964767765	0.035232235	0.747848537	0.933404941	0.830387004
207	1	0	1	1	1	0.797413793	0.202586207	1	0.797413793	0.887290168	0.964767765	0.035232235	0.747848537	0.933404941	0.830387004
207	1	0	1	1	1	0.797413793	0.202586207	1	0.797413793	0.887290168	0.964767765	0.035232235	0.747848537	0.933404941	0.830387004
207	1	0	1	1	1	0.797413793	0.202586207	1	0.797413793	0.887290168	0.964767765	0.035232235	0.747848537	0.933404941	0.830387004
207	1	0	1	1	1	0.797413793	0.202586207	1	0.797413793	0.887290168	0.964767765	0.035232235	0.747848537	0.933404941	0.830387004
207	1	0	1	1	1	0.797413793	0.202586207	1	0.797413793	0.887290168	0.964767765	0.035232235	0.747848537	0.933404941	0.830387004
207	1	0	1	1	1	0.797413793	0.202586207	1	0.797413793	0.887290168	0.964767765	0.035232235	0.747848537	0.933404941	0.830387004
207	1	0	1	1	1	0.797413793	0.202586207	1	0.797413793	0.887290168	0.964767765	0.035232235	0.747848537	0.933404941	0.830387004
207	1	0	1	1	1	0.797413793	0.202586207	1	0.797413793	0.887290168	0.964767765	0.035232235	0.747848537	0.933404941	0.830387004
207	1	0	1	1	1	0.797413793	0.202586207	1	0.797413793	0.887290168	0.964767765	0.035232235	0.747848537	0.933404941	0.830387004
207	1	0	1	1	1	0.797413793	0.202586207	1	0.797413793	0.887290168	0.964767765	0.035232235	0.747848537	0.933404941	0.830387004
207	1	0	1	1	1	0.797413793	0.202586207	1	0.797413793	0.887290168	0.964767765	0.035232235	0.747848537	0.933404941	0.830387004
207	1	0	1	1	1	0.797413793	0.202586207	1	0.797413793	0.887290168	0.964767765	0.035232235	0.747848537	0.933404941	0.830387004
207	1	0	1	1	1	0.797413793	0.202586207	1	0.797413793	0.887290168	0.964767765	0.035232235	0.747848537	0.933404941	0.830387004
207	1	0	1	1	1	0.797413793	0.202586207	1	0.797413793	0.887290168	0.964767765	0.035232235	0.747848537	0.933404941	0.830387004
207	1	0	1	1	1	0.797413793	0.202586207	1	0.797413793	0.887290168	0.964767765	0.035232235	0.747848537	0.933404941	0.830387004
207	1	0	1	1	1	0.797413793	0.202586207	1	0.797413793	0.887290168	0.964767765	0.035232235	0.747848537	0.933404941	0.830387004
207	1	0	1	1	1	0.797413793	0.202586207	1	0.797413793	0.887290168	0.964767765	0.035232235	0.747848537	0.933404941	0.830387004
207	1	0	1	1	1	0.797413793	0.202586207	1	0.797413793	0.887290168	0.964767765	0.035232235	0.747848537	0.933404941	0.830387004
207	1	0	1	1	1	0.797413793	0.202586207	1	0.797413793	0.887290168	0.964767765	0.035232235	0.747848537	0.933404941	0.830387004
207	1	0	1	1	1	0.797413793	0.202586207	1	0.797413793	0.887290168	0.964767765	0.035232235	0.747848537	0.933404941	0.830387004
207	1	0	1	1	1	0.797413793	0.202586207	1	0.797413793	0.887290168	0.964767765	0.035232235	0.747848537	0.933404941	0.830387004
207	1	0	1	1	1	0.797413793	0.202586207	1	0.797413793	0.887290168	0.964767765	0.035232235	0.747848537	0.933404941	0.830387004
207	1	0	1	1	1	0.797413793	0.202586207	1	0.797413793	0.887290168	0.964767765	0.035232235	0.747848537	0.933404941	0.830387004
207	1	0	1	1	1	0.797413793	0.202586207	1	0.797413793	0.887290168	0.964767765	0.035232235	0.747848537	0.933404941	0.830387004
207	1	0	1	1	1	0.797413793	0.202586207	1	0.797413793	0.887290168	0.964767765	0.035232235	0.747848537	0.933404941	0.830387004
207	1	0	1	1	1	0.797413793	0.202586207	1	0.797413793	0.887290168	0.964767765	0.035232235	0.747848537	0.933404941	0.830387004
207	1	0	1	1	1	0.797413793	0.202586207	1	0.797413793	0.887290168	0.964767765	0.035232235	0.747848537	0.933404941	0.830387004
207	1	0	1	1	1	0.797413793	0.202586207	1	0.797413793	0.887290168	0.964767765	0.035232235	0.747848537	0.933404941	0.830387004
207	1	0	1	1	1	0.797413793	0.202586207	1	0.797413793	0.887290168	0.964767765	0.035232235	0.747848537	0.933404941	0.830387004
207	1	0	1	1	1	0.797413793	0.202586207	1	0.797413793	0.887290168	0.964767765	0.035232235	0.747848537	0.933404941	0.830387004
207	1	0	1	1	1	0.797413793	0.202586207	1	0.797413793	0.887290168	0.964767765	0.035232235	0.747848537	0.933404941	0.830387004
207	1	0	1	1	1	0.797413793	0.202586207	1	0.797413793	0.887290168	0.964767765	0.035232235	0.747848537	0.933404941	0.830387004
207	1	0	1	1	1	0.797413793	0.202586207	1	0.797413793	0.887290168	0.964767765	0.035232235	0.747848537	0.933404941	0.830387004
207	1	0	1	1	1	0.797413793	0.202586207	1	0.797413793	0.887290168	0.964767765	0.035232235	0.747848537	0.933404941	0.830387004
207	1	0	1	1	1	0.797413793	0.202586207	1	0.797413793	0.887290168	0.964767765	0.035232235	0.747848537	0.933404941	0.830387004
207	1	0	1	1	1	0.797413793	0.202586207	1	0.797413793	0.887290168	0.964767765	0.035232235	0.747848537	0.933404941	0.830387004
207	1	0	1	1	1	0.797413793	0.202586207	1	0.797413793	0.887290168	0.964767765	0.035232235	0.747848537	0.933404941	0.830387004
207	1	0	1	1	1	0.797413793	0.202586207	1	0.797413793	0.887290168	0.964767765	0.035232235	0.747848537	0.933404941	0.830387004
207	1	0	1	1	1	0.797413793	0.202586207	1	0.797413793	0.887290168	0.964767765	0.035232235	0.747848537	0.933404941	0.830387004
207	1	0	1	1	1	0.797413793	0.202586207	1	0.797413793	0.887290168	0.964767765	0.035232235	0.747848537	0.933404941	0.830387004
207	1	0	1	1	1	0.797413793	0.202586207	1	0.797413793	0.887290168	0.964767765	0.035232235	0.747848537	0.933404941	0.830387004
207	1	0	1	1	1	0.797413793	0.202586207	1	0.797413793	0.887290168	0.964767765	0.035232235	0.747848537	0.933404941	0.830387004
207	1	0	1	1	1	0.797413793	0.202586207	1	0.797413793	0.887290168	0.964767765	0.035232235	0.747848537	0.933404941	0.830387004
207	1	0	1	1	1	0.797413793	0.202586207	1	0.797413793	0.887290168	0.964767765	0.035232235	0.747848537	0.933404941	0.830387004
