# Supplementary material for: An Improved Hybrid Feature Selection Algorithm for Electric Charge Recovery Risk
Source: Hindawi journal article supplement (doi:10.1155/2020/8479341), 2020-08-28
Supplement: f1 [file 8479341.f1.zip › 8479341.f1/Experimental Results/201806/LBPSOSEE_results.csv]

features_num	Accuracy_high	Loss_high	Precission_high	Recall_high	F1_high	Accuracy_med	Loss_med	Precission_med	Recall_med	F1_med	Accuracy_low	Loss_low	Precission_low	Recall_low	F1_low
386	1.0	0.0	1.0	1.0	1.0	0.8051948051948052	0.19480519480519476	0.9184149184149184	0.8491379310344828	0.8824188129899215	0.8976283398378865	0.10237166016211352	0.46626180836707154	0.7486457204767064	0.5746361746361748
386	1.0	0.0	1.0	1.0	1.0	0.8051948051948052	0.19480519480519476	0.9184149184149184	0.8491379310344828	0.8824188129899215	0.8976283398378865	0.10237166016211352	0.46626180836707154	0.7486457204767064	0.5746361746361748
386	1.0	0.0	1.0	1.0	1.0	0.8051948051948052	0.19480519480519476	0.9184149184149184	0.8491379310344828	0.8824188129899215	0.8976283398378865	0.10237166016211352	0.46626180836707154	0.7486457204767064	0.5746361746361748
386	1.0	0.0	1.0	1.0	1.0	0.8051948051948052	0.19480519480519476	0.9184149184149184	0.8491379310344828	0.8824188129899215	0.8976283398378865	0.10237166016211352	0.46626180836707154	0.7486457204767064	0.5746361746361748
274	1.0	0.0	1.0	1.0	1.0	0.8075949367088607	0.19240506329113927	0.9150521609538003	0.8660084626234132	0.889855072463768	0.9220952969023362	0.07790470309766384	0.45695364238410596	0.8453292496171516	0.5932294465341215
274	1.0	0.0	1.0	1.0	1.0	0.8075949367088607	0.19240506329113927	0.9150521609538003	0.8660084626234132	0.889855072463768	0.9220952969023362	0.07790470309766384	0.45695364238410596	0.8453292496171516	0.5932294465341215
274	1.0	0.0	1.0	1.0	1.0	0.8075949367088607	0.19240506329113927	0.9150521609538003	0.8660084626234132	0.889855072463768	0.9220952969023362	0.07790470309766384	0.45695364238410596	0.8453292496171516	0.5932294465341215
274	1.0	0.0	1.0	1.0	1.0	0.8075949367088607	0.19240506329113927	0.9150521609538003	0.8660084626234132	0.889855072463768	0.9220952969023362	0.07790470309766384	0.45695364238410596	0.8453292496171516	0.5932294465341215
238	1.0	0.0	1.0	1.0	1.0	0.8457792207792207	0.15422077922077926	0.9980806142034548	0.8469055374592834	0.9162995594713657	0.9112253123740427	0.0887746876259573	0.4647887323943662	0.8450704225352113	0.5997273966378918
238	1.0	0.0	1.0	1.0	1.0	0.8457792207792207	0.15422077922077926	0.9980806142034548	0.8469055374592834	0.9162995594713657	0.9112253123740427	0.0887746876259573	0.4647887323943662	0.8450704225352113	0.5997273966378918
238	1.0	0.0	1.0	1.0	1.0	0.8457792207792207	0.15422077922077926	0.9980806142034548	0.8469055374592834	0.9162995594713657	0.9112253123740427	0.0887746876259573	0.4647887323943662	0.8450704225352113	0.5997273966378918
238	1.0	0.0	1.0	1.0	1.0	0.8457792207792207	0.15422077922077926	0.9980806142034548	0.8469055374592834	0.9162995594713657	0.9112253123740427	0.0887746876259573	0.4647887323943662	0.8450704225352113	0.5997273966378918
238	1.0	0.0	1.0	1.0	1.0	0.8457792207792207	0.15422077922077926	0.9980806142034548	0.8469055374592834	0.9162995594713657	0.9112253123740427	0.0887746876259573	0.4647887323943662	0.8450704225352113	0.5997273966378918
238	1.0	0.0	1.0	1.0	1.0	0.8457792207792207	0.15422077922077926	0.9980806142034548	0.8469055374592834	0.9162995594713657	0.9112253123740427	0.0887746876259573	0.4647887323943662	0.8450704225352113	0.5997273966378918
238	1.0	0.0	1.0	1.0	1.0	0.8457792207792207	0.15422077922077926	0.9980806142034548	0.8469055374592834	0.9162995594713657	0.9112253123740427	0.0887746876259573	0.4647887323943662	0.8450704225352113	0.5997273966378918
238	1.0	0.0	1.0	1.0	1.0	0.8457792207792207	0.15422077922077926	0.9980806142034548	0.8469055374592834	0.9162995594713657	0.9112253123740427	0.0887746876259573	0.4647887323943662	0.8450704225352113	0.5997273966378918
238	1.0	0.0	1.0	1.0	1.0	0.8457792207792207	0.15422077922077926	0.9980806142034548	0.8469055374592834	0.9162995594713657	0.9112253123740427	0.0887746876259573	0.4647887323943662	0.8450704225352113	0.5997273966378918
238	1.0	0.0	1.0	1.0	1.0	0.8457792207792207	0.15422077922077926	0.9980806142034548	0.8469055374592834	0.9162995594713657	0.9112253123740427	0.0887746876259573	0.4647887323943662	0.8450704225352113	0.5997273966378918
238	1.0	0.0	1.0	1.0	1.0	0.8457792207792207	0.15422077922077926	0.9980806142034548	0.8469055374592834	0.9162995594713657	0.9112253123740427	0.0887746876259573	0.4647887323943662	0.8450704225352113	0.5997273966378918
238	1.0	0.0	1.0	1.0	1.0	0.8457792207792207	0.15422077922077926	0.9980806142034548	0.8469055374592834	0.9162995594713657	0.9112253123740427	0.0887746876259573	0.4647887323943662	0.8450704225352113	0.5997273966378918
238	1.0	0.0	1.0	1.0	1.0	0.8457792207792207	0.15422077922077926	0.9980806142034548	0.8469055374592834	0.9162995594713657	0.9112253123740427	0.0887746876259573	0.4647887323943662	0.8450704225352113	0.5997273966378918
238	1.0	0.0	1.0	1.0	1.0	0.8457792207792207	0.15422077922077926	0.9980806142034548	0.8469055374592834	0.9162995594713657	0.9112253123740427	0.0887746876259573	0.4647887323943662	0.8450704225352113	0.5997273966378918
238	1.0	0.0	1.0	1.0	1.0	0.8457792207792207	0.15422077922077926	0.9980806142034548	0.8469055374592834	0.9162995594713657	0.9112253123740427	0.0887746876259573	0.4647887323943662	0.8450704225352113	0.5997273966378918
238	1.0	0.0	1.0	1.0	1.0	0.8457792207792207	0.15422077922077926	0.9980806142034548	0.8469055374592834	0.9162995594713657	0.9112253123740427	0.0887746876259573	0.4647887323943662	0.8450704225352113	0.5997273966378918
238	1.0	0.0	1.0	1.0	1.0	0.8457792207792207	0.15422077922077926	0.9980806142034548	0.8469055374592834	0.9162995594713657	0.9112253123740427	0.0887746876259573	0.4647887323943662	0.8450704225352113	0.5997273966378918
238	1.0	0.0	1.0	1.0	1.0	0.8457792207792207	0.15422077922077926	0.9980806142034548	0.8469055374592834	0.9162995594713657	0.9112253123740427	0.0887746876259573	0.4647887323943662	0.8450704225352113	0.5997273966378918
224	1.0	0.0	1.0	1.0	1.0	0.8177905308464849	0.1822094691535151	1.0	0.8177905308464849	0.899763220205209	0.9281723051915066	0.07182769480849338	0.4966542750929368	0.9570200573065902	0.653940283896231
224	1.0	0.0	1.0	1.0	1.0	0.8177905308464849	0.1822094691535151	1.0	0.8177905308464849	0.899763220205209	0.9281723051915066	0.07182769480849338	0.4966542750929368	0.9570200573065902	0.653940283896231
224	1.0	0.0	1.0	1.0	1.0	0.8177905308464849	0.1822094691535151	1.0	0.8177905308464849	0.899763220205209	0.9281723051915066	0.07182769480849338	0.4966542750929368	0.9570200573065902	0.653940283896231
224	1.0	0.0	1.0	1.0	1.0	0.8177905308464849	0.1822094691535151	1.0	0.8177905308464849	0.899763220205209	0.9281723051915066	0.07182769480849338	0.4966542750929368	0.9570200573065902	0.653940283896231
224	1.0	0.0	1.0	1.0	1.0	0.8177905308464849	0.1822094691535151	1.0	0.8177905308464849	0.899763220205209	0.9281723051915066	0.07182769480849338	0.4966542750929368	0.9570200573065902	0.653940283896231
224	1.0	0.0	1.0	1.0	1.0	0.8177905308464849	0.1822094691535151	1.0	0.8177905308464849	0.899763220205209	0.9281723051915066	0.07182769480849338	0.4966542750929368	0.9570200573065902	0.653940283896231
224	1.0	0.0	1.0	1.0	1.0	0.8177905308464849	0.1822094691535151	1.0	0.8177905308464849	0.899763220205209	0.9281723051915066	0.07182769480849338	0.4966542750929368	0.9570200573065902	0.653940283896231
224	1.0	0.0	1.0	1.0	1.0	0.8177905308464849	0.1822094691535151	1.0	0.8177905308464849	0.899763220205209	0.9281723051915066	0.07182769480849338	0.4966542750929368	0.9570200573065902	0.653940283896231
224	1.0	0.0	1.0	1.0	1.0	0.8177905308464849	0.1822094691535151	1.0	0.8177905308464849	0.899763220205209	0.9281723051915066	0.07182769480849338	0.4966542750929368	0.9570200573065902	0.653940283896231
224	1.0	0.0	1.0	1.0	1.0	0.8177905308464849	0.1822094691535151	1.0	0.8177905308464849	0.899763220205209	0.9281723051915066	0.07182769480849338	0.4966542750929368	0.9570200573065902	0.653940283896231
224	1.0	0.0	1.0	1.0	1.0	0.8177905308464849	0.1822094691535151	1.0	0.8177905308464849	0.899763220205209	0.9281723051915066	0.07182769480849338	0.4966542750929368	0.9570200573065902	0.653940283896231
224	1.0	0.0	1.0	1.0	1.0	0.8177905308464849	0.1822094691535151	1.0	0.8177905308464849	0.899763220205209	0.9281723051915066	0.07182769480849338	0.4966542750929368	0.9570200573065902	0.653940283896231
224	1.0	0.0	1.0	1.0	1.0	0.8177905308464849	0.1822094691535151	1.0	0.8177905308464849	0.899763220205209	0.9281723051915066	0.07182769480849338	0.4966542750929368	0.9570200573065902	0.653940283896231
224	1.0	0.0	1.0	1.0	1.0	0.8177905308464849	0.1822094691535151	1.0	0.8177905308464849	0.899763220205209	0.9281723051915066	0.07182769480849338	0.4966542750929368	0.9570200573065902	0.653940283896231
217	1.0	0.0	1.0	1.0	1.0	0.780718336483932	0.21928166351606804	0.9740566037735849	0.7972972972972973	0.8768577494692145	0.9612348886002597	0.03876511139974026	0.7667031763417306	0.8	0.7829977628635347
217	1.0	0.0	1.0	1.0	1.0	0.780718336483932	0.21928166351606804	0.9740566037735849	0.7972972972972973	0.8768577494692145	0.9612348886002597	0.03876511139974026	0.7667031763417306	0.8	0.7829977628635347
216	1.0	0.0	1.0	1.0	1.0	0.789279112754159	0.21072088724584104	0.9748858447488584	0.8056603773584906	0.8822314049586777	0.9610844337735094	0.03891556622649062	0.7590361445783133	0.8039443155452436	0.7808450704225353
216	1.0	0.0	1.0	1.0	1.0	0.789279112754159	0.21072088724584104	0.9748858447488584	0.8056603773584906	0.8822314049586777	0.9610844337735094	0.03891556622649062	0.7590361445783133	0.8039443155452436	0.7808450704225353
216	1.0	0.0	1.0	1.0	1.0	0.789279112754159	0.21072088724584104	0.9748858447488584	0.8056603773584906	0.8822314049586777	0.9610844337735094	0.03891556622649062	0.7590361445783133	0.8039443155452436	0.7808450704225353
216	1.0	0.0	1.0	1.0	1.0	0.789279112754159	0.21072088724584104	0.9748858447488584	0.8056603773584906	0.8822314049586777	0.9610844337735094	0.03891556622649062	0.7590361445783133	0.8039443155452436	0.7808450704225353
216	1.0	0.0	1.0	1.0	1.0	0.789279112754159	0.21072088724584104	0.9748858447488584	0.8056603773584906	0.8822314049586777	0.9610844337735094	0.03891556622649062	0.7590361445783133	0.8039443155452436	0.7808450704225353
216	1.0	0.0	1.0	1.0	1.0	0.789279112754159	0.21072088724584104	0.9748858447488584	0.8056603773584906	0.8822314049586777	0.9610844337735094	0.03891556622649062	0.7590361445783133	0.8039443155452436	0.7808450704225353
216	1.0	0.0	1.0	1.0	1.0	0.789279112754159	0.21072088724584104	0.9748858447488584	0.8056603773584906	0.8822314049586777	0.9610844337735094	0.03891556622649062	0.7590361445783133	0.8039443155452436	0.7808450704225353
216	1.0	0.0	1.0	1.0	1.0	0.789279112754159	0.21072088724584104	0.9748858447488584	0.8056603773584906	0.8822314049586777	0.9610844337735094	0.03891556622649062	0.7590361445783133	0.8039443155452436	0.7808450704225353
216	1.0	0.0	1.0	1.0	1.0	0.789279112754159	0.21072088724584104	0.9748858447488584	0.8056603773584906	0.8822314049586777	0.9610844337735094	0.03891556622649062	0.7590361445783133	0.8039443155452436	0.7808450704225353
216	1.0	0.0	1.0	1.0	1.0	0.789279112754159	0.21072088724584104	0.9748858447488584	0.8056603773584906	0.8822314049586777	0.9610844337735094	0.03891556622649062	0.7590361445783133	0.8039443155452436	0.7808450704225353
216	1.0	0.0	1.0	1.0	1.0	0.789279112754159	0.21072088724584104	0.9748858447488584	0.8056603773584906	0.8822314049586777	0.9610844337735094	0.03891556622649062	0.7590361445783133	0.8039443155452436	0.7808450704225353
216	1.0	0.0	1.0	1.0	1.0	0.789279112754159	0.21072088724584104	0.9748858447488584	0.8056603773584906	0.8822314049586777	0.9610844337735094	0.03891556622649062	0.7590361445783133	0.8039443155452436	0.7808450704225353
216	1.0	0.0	1.0	1.0	1.0	0.789279112754159	0.21072088724584104	0.9748858447488584	0.8056603773584906	0.8822314049586777	0.9610844337735094	0.03891556622649062	0.7590361445783133	0.8039443155452436	0.7808450704225353
216	1.0	0.0	1.0	1.0	1.0	0.789279112754159	0.21072088724584104	0.9748858447488584	0.8056603773584906	0.8822314049586777	0.9610844337735094	0.03891556622649062	0.7590361445783133	0.8039443155452436	0.7808450704225353
216	1.0	0.0	1.0	1.0	1.0	0.789279112754159	0.21072088724584104	0.9748858447488584	0.8056603773584906	0.8822314049586777	0.9610844337735094	0.03891556622649062	0.7590361445783133	0.8039443155452436	0.7808450704225353
216	1.0	0.0	1.0	1.0	1.0	0.789279112754159	0.21072088724584104	0.9748858447488584	0.8056603773584906	0.8822314049586777	0.9610844337735094	0.03891556622649062	0.7590361445783133	0.8039443155452436	0.7808450704225353
216	1.0	0.0	1.0	1.0	1.0	0.789279112754159	0.21072088724584104	0.9748858447488584	0.8056603773584906	0.8822314049586777	0.9610844337735094	0.03891556622649062	0.7590361445783133	0.8039443155452436	0.7808450704225353
216	1.0	0.0	1.0	1.0	1.0	0.789279112754159	0.21072088724584104	0.9748858447488584	0.8056603773584906	0.8822314049586777	0.9610844337735094	0.03891556622649062	0.7590361445783133	0.8039443155452436	0.7808450704225353
216	1.0	0.0	1.0	1.0	1.0	0.789279112754159	0.21072088724584104	0.9748858447488584	0.8056603773584906	0.8822314049586777	0.9610844337735094	0.03891556622649062	0.7590361445783133	0.8039443155452436	0.7808450704225353
216	1.0	0.0	1.0	1.0	1.0	0.789279112754159	0.21072088724584104	0.9748858447488584	0.8056603773584906	0.8822314049586777	0.9610844337735094	0.03891556622649062	0.7590361445783133	0.8039443155452436	0.7808450704225353
216	1.0	0.0	1.0	1.0	1.0	0.789279112754159	0.21072088724584104	0.9748858447488584	0.8056603773584906	0.8822314049586777	0.9610844337735094	0.03891556622649062	0.7590361445783133	0.8039443155452436	0.7808450704225353
216	1.0	0.0	1.0	1.0	1.0	0.789279112754159	0.21072088724584104	0.9748858447488584	0.8056603773584906	0.8822314049586777	0.9610844337735094	0.03891556622649062	0.7590361445783133	0.8039443155452436	0.7808450704225353
216	1.0	0.0	1.0	1.0	1.0	0.789279112754159	0.21072088724584104	0.9748858447488584	0.8056603773584906	0.8822314049586777	0.9610844337735094	0.03891556622649062	0.7590361445783133	0.8039443155452436	0.7808450704225353
216	1.0	0.0	1.0	1.0	1.0	0.789279112754159	0.21072088724584104	0.9748858447488584	0.8056603773584906	0.8822314049586777	0.9610844337735094	0.03891556622649062	0.7590361445783133	0.8039443155452436	0.7808450704225353
216	1.0	0.0	1.0	1.0	1.0	0.789279112754159	0.21072088724584104	0.9748858447488584	0.8056603773584906	0.8822314049586777	0.9610844337735094	0.03891556622649062	0.7590361445783133	0.8039443155452436	0.7808450704225353
216	1.0	0.0	1.0	1.0	1.0	0.789279112754159	0.21072088724584104	0.9748858447488584	0.8056603773584906	0.8822314049586777	0.9610844337735094	0.03891556622649062	0.7590361445783133	0.8039443155452436	0.7808450704225353
216	1.0	0.0	1.0	1.0	1.0	0.789279112754159	0.21072088724584104	0.9748858447488584	0.8056603773584906	0.8822314049586777	0.9610844337735094	0.03891556622649062	0.7590361445783133	0.8039443155452436	0.7808450704225353
216	1.0	0.0	1.0	1.0	1.0	0.789279112754159	0.21072088724584104	0.9748858447488584	0.8056603773584906	0.8822314049586777	0.9610844337735094	0.03891556622649062	0.7590361445783133	0.8039443155452436	0.7808450704225353
216	1.0	0.0	1.0	1.0	1.0	0.789279112754159	0.21072088724584104	0.9748858447488584	0.8056603773584906	0.8822314049586777	0.9610844337735094	0.03891556622649062	0.7590361445783133	0.8039443155452436	0.7808450704225353
216	1.0	0.0	1.0	1.0	1.0	0.789279112754159	0.21072088724584104	0.9748858447488584	0.8056603773584906	0.8822314049586777	0.9610844337735094	0.03891556622649062	0.7590361445783133	0.8039443155452436	0.7808450704225353
216	1.0	0.0	1.0	1.0	1.0	0.789279112754159	0.21072088724584104	0.9748858447488584	0.8056603773584906	0.8822314049586777	0.9610844337735094	0.03891556622649062	0.7590361445783133	0.8039443155452436	0.7808450704225353
216	1.0	0.0	1.0	1.0	1.0	0.789279112754159	0.21072088724584104	0.9748858447488584	0.8056603773584906	0.8822314049586777	0.9610844337735094	0.03891556622649062	0.7590361445783133	0.8039443155452436	0.7808450704225353
216	1.0	0.0	1.0	1.0	1.0	0.789279112754159	0.21072088724584104	0.9748858447488584	0.8056603773584906	0.8822314049586777	0.9610844337735094	0.03891556622649062	0.7590361445783133	0.8039443155452436	0.7808450704225353
216	1.0	0.0	1.0	1.0	1.0	0.789279112754159	0.21072088724584104	0.9748858447488584	0.8056603773584906	0.8822314049586777	0.9610844337735094	0.03891556622649062	0.7590361445783133	0.8039443155452436	0.7808450704225353
216	1.0	0.0	1.0	1.0	1.0	0.789279112754159	0.21072088724584104	0.9748858447488584	0.8056603773584906	0.8822314049586777	0.9610844337735094	0.03891556622649062	0.7590361445783133	0.8039443155452436	0.7808450704225353
216	1.0	0.0	1.0	1.0	1.0	0.789279112754159	0.21072088724584104	0.9748858447488584	0.8056603773584906	0.8822314049586777	0.9610844337735094	0.03891556622649062	0.7590361445783133	0.8039443155452436	0.7808450704225353
216	1.0	0.0	1.0	1.0	1.0	0.789279112754159	0.21072088724584104	0.9748858447488584	0.8056603773584906	0.8822314049586777	0.9610844337735094	0.03891556622649062	0.7590361445783133	0.8039443155452436	0.7808450704225353
216	1.0	0.0	1.0	1.0	1.0	0.789279112754159	0.21072088724584104	0.9748858447488584	0.8056603773584906	0.8822314049586777	0.9610844337735094	0.03891556622649062	0.7590361445783133	0.8039443155452436	0.7808450704225353
216	1.0	0.0	1.0	1.0	1.0	0.789279112754159	0.21072088724584104	0.9748858447488584	0.8056603773584906	0.8822314049586777	0.9610844337735094	0.03891556622649062	0.7590361445783133	0.8039443155452436	0.7808450704225353
216	1.0	0.0	1.0	1.0	1.0	0.789279112754159	0.21072088724584104	0.9748858447488584	0.8056603773584906	0.8822314049586777	0.9610844337735094	0.03891556622649062	0.7590361445783133	0.8039443155452436	0.7808450704225353
216	1.0	0.0	1.0	1.0	1.0	0.789279112754159	0.21072088724584104	0.9748858447488584	0.8056603773584906	0.8822314049586777	0.9610844337735094	0.03891556622649062	0.7590361445783133	0.8039443155452436	0.7808450704225353
216	1.0	0.0	1.0	1.0	1.0	0.789279112754159	0.21072088724584104	0.9748858447488584	0.8056603773584906	0.8822314049586777	0.9610844337735094	0.03891556622649062	0.7590361445783133	0.8039443155452436	0.7808450704225353
216	1.0	0.0	1.0	1.0	1.0	0.789279112754159	0.21072088724584104	0.9748858447488584	0.8056603773584906	0.8822314049586777	0.9610844337735094	0.03891556622649062	0.7590361445783133	0.8039443155452436	0.7808450704225353
216	1.0	0.0	1.0	1.0	1.0	0.789279112754159	0.21072088724584104	0.9748858447488584	0.8056603773584906	0.8822314049586777	0.9610844337735094	0.03891556622649062	0.7590361445783133	0.8039443155452436	0.7808450704225353
216	1.0	0.0	1.0	1.0	1.0	0.789279112754159	0.21072088724584104	0.9748858447488584	0.8056603773584906	0.8822314049586777	0.9610844337735094	0.03891556622649062	0.7590361445783133	0.8039443155452436	0.7808450704225353
216	1.0	0.0	1.0	1.0	1.0	0.789279112754159	0.21072088724584104	0.9748858447488584	0.8056603773584906	0.8822314049586777	0.9610844337735094	0.03891556622649062	0.7590361445783133	0.8039443155452436	0.7808450704225353
216	1.0	0.0	1.0	1.0	1.0	0.789279112754159	0.21072088724584104	0.9748858447488584	0.8056603773584906	0.8822314049586777	0.9610844337735094	0.03891556622649062	0.7590361445783133	0.8039443155452436	0.7808450704225353
216	1.0	0.0	1.0	1.0	1.0	0.789279112754159	0.21072088724584104	0.9748858447488584	0.8056603773584906	0.8822314049586777	0.9610844337735094	0.03891556622649062	0.7590361445783133	0.8039443155452436	0.7808450704225353
216	1.0	0.0	1.0	1.0	1.0	0.789279112754159	0.21072088724584104	0.9748858447488584	0.8056603773584906	0.8822314049586777	0.9610844337735094	0.03891556622649062	0.7590361445783133	0.8039443155452436	0.7808450704225353
216	1.0	0.0	1.0	1.0	1.0	0.789279112754159	0.21072088724584104	0.9748858447488584	0.8056603773584906	0.8822314049586777	0.9610844337735094	0.03891556622649062	0.7590361445783133	0.8039443155452436	0.7808450704225353
216	1.0	0.0	1.0	1.0	1.0	0.789279112754159	0.21072088724584104	0.9748858447488584	0.8056603773584906	0.8822314049586777	0.9610844337735094	0.03891556622649062	0.7590361445783133	0.8039443155452436	0.7808450704225353
216	1.0	0.0	1.0	1.0	1.0	0.789279112754159	0.21072088724584104	0.9748858447488584	0.8056603773584906	0.8822314049586777	0.9610844337735094	0.03891556622649062	0.7590361445783133	0.8039443155452436	0.7808450704225353
216	1.0	0.0	1.0	1.0	1.0	0.789279112754159	0.21072088724584104	0.9748858447488584	0.8056603773584906	0.8822314049586777	0.9610844337735094	0.03891556622649062	0.7590361445783133	0.8039443155452436	0.7808450704225353
216	1.0	0.0	1.0	1.0	1.0	0.789279112754159	0.21072088724584104	0.9748858447488584	0.8056603773584906	0.8822314049586777	0.9610844337735094	0.03891556622649062	0.7590361445783133	0.8039443155452436	0.7808450704225353
216	1.0	0.0	1.0	1.0	1.0	0.789279112754159	0.21072088724584104	0.9748858447488584	0.8056603773584906	0.8822314049586777	0.9610844337735094	0.03891556622649062	0.7590361445783133	0.8039443155452436	0.7808450704225353
216	1.0	0.0	1.0	1.0	1.0	0.789279112754159	0.21072088724584104	0.9748858447488584	0.8056603773584906	0.8822314049586777	0.9610844337735094	0.03891556622649062	0.7590361445783133	0.8039443155452436	0.7808450704225353
216	1.0	0.0	1.0	1.0	1.0	0.789279112754159	0.21072088724584104	0.9748858447488584	0.8056603773584906	0.8822314049586777	0.9610844337735094	0.03891556622649062	0.7590361445783133	0.8039443155452436	0.7808450704225353
216	1.0	0.0	1.0	1.0	1.0	0.789279112754159	0.21072088724584104	0.9748858447488584	0.8056603773584906	0.8822314049586777	0.9610844337735094	0.03891556622649062	0.7590361445783133	0.8039443155452436	0.7808450704225353
