# Supplementary material for: An Improved Hybrid Feature Selection Algorithm for Electric Charge Recovery Risk
Source: Hindawi journal article supplement (doi:10.1155/2020/8479341), 2020-08-28
Supplement: f1 [file 8479341.f1.zip › 8479341.f1/Experimental Results/201806/LBPSOSEE_SBS_results.csv]

features_num	Accuracy_high	Loss_high	Precission_high	Recall_high	F1_high	Accuracy_med	Loss_med	Precission_med	Recall_med	F1_med	Accuracy_low	Loss_low	Precission_low	Recall_low	F1_low
216	1	0	1	1	1	0.784926471	0.215073529	0.974885845	0.801125704	0.879505664	0.961272891	0.038727109	0.757641921	0.807916182	0.781971831
215	1	0	1	1	1	0.784926471	0.215073529	0.974885845	0.801125704	0.879505664	0.961272891	0.038727109	0.757641921	0.807916182	0.781971831
215	1	0	1	1	1	0.784926471	0.215073529	0.974885845	0.801125704	0.879505664	0.961272891	0.038727109	0.757641921	0.807916182	0.781971831
214	1	0	1	1	1	0.787822878	0.212177122	0.974885845	0.804143126	0.881320949	0.96108054	0.03891946	0.75877193	0.803716609	0.780597857
214	1	0	1	1	1	0.787822878	0.212177122	0.974885845	0.804143126	0.881320949	0.96108054	0.03891946	0.75877193	0.803716609	0.780597857
214	1	0	1	1	1	0.787822878	0.212177122	0.974885845	0.804143126	0.881320949	0.96108054	0.03891946	0.75877193	0.803716609	0.780597857
213	1	0	1	1	1	0.787822878	0.212177122	0.974885845	0.804143126	0.881320949	0.96108054	0.03891946	0.75877193	0.803716609	0.780597857
213	1	0	1	1	1	0.787822878	0.212177122	0.974885845	0.804143126	0.881320949	0.96108054	0.03891946	0.75877193	0.803716609	0.780597857
213	1	0	1	1	1	0.787822878	0.212177122	0.974885845	0.804143126	0.881320949	0.96108054	0.03891946	0.75877193	0.803716609	0.780597857
213	1	0	1	1	1	0.787822878	0.212177122	0.974885845	0.804143126	0.881320949	0.96108054	0.03891946	0.75877193	0.803716609	0.780597857
213	1	0	1	1	1	0.787822878	0.212177122	0.974885845	0.804143126	0.881320949	0.96108054	0.03891946	0.75877193	0.803716609	0.780597857
212	1	0	1	1	1	0.787822878	0.212177122	0.974885845	0.804143126	0.881320949	0.96108054	0.03891946	0.75877193	0.803716609	0.780597857
212	1	0	1	1	1	0.787822878	0.212177122	0.974885845	0.804143126	0.881320949	0.96108054	0.03891946	0.75877193	0.803716609	0.780597857
212	1	0	1	1	1	0.787822878	0.212177122	0.974885845	0.804143126	0.881320949	0.96108054	0.03891946	0.75877193	0.803716609	0.780597857
212	1	0	1	1	1	0.787822878	0.212177122	0.974885845	0.804143126	0.881320949	0.96108054	0.03891946	0.75877193	0.803716609	0.780597857
211	1	0	1	1	1	0.784926471	0.215073529	0.974885845	0.801125704	0.879505664	0.961372961	0.038627039	0.757906216	0.809080326	0.782657658
210	1	0	1	1	1	0.787822878	0.212177122	0.974885845	0.804143126	0.881320949	0.96118059	0.03881941	0.759036145	0.804878049	0.781285231
210	1	0	1	1	1	0.787822878	0.212177122	0.974885845	0.804143126	0.881320949	0.96118059	0.03881941	0.759036145	0.804878049	0.781285231
210	1	0	1	1	1	0.787822878	0.212177122	0.974885845	0.804143126	0.881320949	0.96118059	0.03881941	0.759036145	0.804878049	0.781285231
210	1	0	1	1	1	0.787822878	0.212177122	0.974885845	0.804143126	0.881320949	0.96118059	0.03881941	0.759036145	0.804878049	0.781285231
210	1	0	1	1	1	0.787822878	0.212177122	0.974885845	0.804143126	0.881320949	0.96118059	0.03881941	0.759036145	0.804878049	0.781285231
210	1	0	1	1	1	0.787822878	0.212177122	0.974885845	0.804143126	0.881320949	0.96118059	0.03881941	0.759036145	0.804878049	0.781285231
210	1	0	1	1	1	0.787822878	0.212177122	0.974885845	0.804143126	0.881320949	0.96118059	0.03881941	0.759036145	0.804878049	0.781285231
210	1	0	1	1	1	0.787822878	0.212177122	0.974885845	0.804143126	0.881320949	0.96118059	0.03881941	0.759036145	0.804878049	0.781285231
209	1	0	1	1	1	0.787822878	0.212177122	0.974885845	0.804143126	0.881320949	0.96118059	0.03881941	0.758469945	0.806039489	0.781531532
209	1	0	1	1	1	0.787822878	0.212177122	0.974885845	0.804143126	0.881320949	0.96118059	0.03881941	0.758469945	0.806039489	0.781531532
209	1	0	1	1	1	0.787822878	0.212177122	0.974885845	0.804143126	0.881320949	0.96118059	0.03881941	0.758469945	0.806039489	0.781531532
209	1	0	1	1	1	0.787822878	0.212177122	0.974885845	0.804143126	0.881320949	0.96118059	0.03881941	0.758469945	0.806039489	0.781531532
209	1	0	1	1	1	0.787822878	0.212177122	0.974885845	0.804143126	0.881320949	0.96118059	0.03881941	0.758469945	0.806039489	0.781531532
209	1	0	1	1	1	0.787822878	0.212177122	0.974885845	0.804143126	0.881320949	0.96118059	0.03881941	0.758469945	0.806039489	0.781531532
209	1	0	1	1	1	0.787822878	0.212177122	0.974885845	0.804143126	0.881320949	0.96118059	0.03881941	0.758469945	0.806039489	0.781531532
209	1	0	1	1	1	0.787822878	0.212177122	0.974885845	0.804143126	0.881320949	0.96118059	0.03881941	0.758469945	0.806039489	0.781531532
209	1	0	1	1	1	0.787822878	0.212177122	0.974885845	0.804143126	0.881320949	0.96118059	0.03881941	0.758469945	0.806039489	0.781531532
209	1	0	1	1	1	0.787822878	0.212177122	0.974885845	0.804143126	0.881320949	0.96118059	0.03881941	0.758469945	0.806039489	0.781531532
209	1	0	1	1	1	0.787822878	0.212177122	0.974885845	0.804143126	0.881320949	0.96118059	0.03881941	0.758469945	0.806039489	0.781531532
209	1	0	1	1	1	0.787822878	0.212177122	0.974885845	0.804143126	0.881320949	0.96118059	0.03881941	0.758469945	0.806039489	0.781531532
209	1	0	1	1	1	0.787822878	0.212177122	0.974885845	0.804143126	0.881320949	0.96118059	0.03881941	0.758469945	0.806039489	0.781531532
209	1	0	1	1	1	0.787822878	0.212177122	0.974885845	0.804143126	0.881320949	0.96118059	0.03881941	0.758469945	0.806039489	0.781531532
209	1	0	1	1	1	0.787822878	0.212177122	0.974885845	0.804143126	0.881320949	0.96118059	0.03881941	0.758469945	0.806039489	0.781531532
209	1	0	1	1	1	0.787822878	0.212177122	0.974885845	0.804143126	0.881320949	0.96118059	0.03881941	0.758469945	0.806039489	0.781531532
208	1	0	1	1	1	0.789279113	0.210720887	0.974885845	0.805660377	0.882231405	0.961084434	0.038915566	0.759036145	0.803944316	0.78084507
208	1	0	1	1	1	0.789279113	0.210720887	0.974885845	0.805660377	0.882231405	0.961084434	0.038915566	0.759036145	0.803944316	0.78084507
208	1	0	1	1	1	0.789279113	0.210720887	0.974885845	0.805660377	0.882231405	0.961084434	0.038915566	0.759036145	0.803944316	0.78084507
207	1	0	1	1	1	0.79266055	0.20733945	0.9751693	0.808988764	0.884339816	0.961068855	0.038931145	0.754062839	0.811188811	0.78158338
207	1	0	1	1	1	0.79266055	0.20733945	0.9751693	0.808988764	0.884339816	0.961068855	0.038931145	0.754062839	0.811188811	0.78158338
207	1	0	1	1	1	0.79266055	0.20733945	0.9751693	0.808988764	0.884339816	0.961068855	0.038931145	0.754062839	0.811188811	0.78158338
207	1	0	1	1	1	0.79266055	0.20733945	0.9751693	0.808988764	0.884339816	0.961068855	0.038931145	0.754062839	0.811188811	0.78158338
207	1	0	1	1	1	0.79266055	0.20733945	0.9751693	0.808988764	0.884339816	0.961068855	0.038931145	0.754062839	0.811188811	0.78158338
207	1	0	1	1	1	0.79266055	0.20733945	0.9751693	0.808988764	0.884339816	0.961068855	0.038931145	0.754062839	0.811188811	0.78158338
207	1	0	1	1	1	0.79266055	0.20733945	0.9751693	0.808988764	0.884339816	0.961068855	0.038931145	0.754062839	0.811188811	0.78158338
207	1	0	1	1	1	0.79266055	0.20733945	0.9751693	0.808988764	0.884339816	0.961068855	0.038931145	0.754062839	0.811188811	0.78158338
207	1	0	1	1	1	0.79266055	0.20733945	0.9751693	0.808988764	0.884339816	0.961068855	0.038931145	0.754062839	0.811188811	0.78158338
207	1	0	1	1	1	0.79266055	0.20733945	0.9751693	0.808988764	0.884339816	0.961068855	0.038931145	0.754062839	0.811188811	0.78158338
207	1	0	1	1	1	0.79266055	0.20733945	0.9751693	0.808988764	0.884339816	0.961068855	0.038931145	0.754062839	0.811188811	0.78158338
207	1	0	1	1	1	0.79266055	0.20733945	0.9751693	0.808988764	0.884339816	0.961068855	0.038931145	0.754062839	0.811188811	0.78158338
207	1	0	1	1	1	0.79266055	0.20733945	0.9751693	0.808988764	0.884339816	0.961068855	0.038931145	0.754062839	0.811188811	0.78158338
207	1	0	1	1	1	0.79266055	0.20733945	0.9751693	0.808988764	0.884339816	0.961068855	0.038931145	0.754062839	0.811188811	0.78158338
207	1	0	1	1	1	0.79266055	0.20733945	0.9751693	0.808988764	0.884339816	0.961068855	0.038931145	0.754062839	0.811188811	0.78158338
207	1	0	1	1	1	0.79266055	0.20733945	0.9751693	0.808988764	0.884339816	0.961068855	0.038931145	0.754062839	0.811188811	0.78158338
207	1	0	1	1	1	0.79266055	0.20733945	0.9751693	0.808988764	0.884339816	0.961068855	0.038931145	0.754062839	0.811188811	0.78158338
207	1	0	1	1	1	0.79266055	0.20733945	0.9751693	0.808988764	0.884339816	0.961068855	0.038931145	0.754062839	0.811188811	0.78158338
207	1	0	1	1	1	0.79266055	0.20733945	0.9751693	0.808988764	0.884339816	0.961068855	0.038931145	0.754062839	0.811188811	0.78158338
207	1	0	1	1	1	0.79266055	0.20733945	0.9751693	0.808988764	0.884339816	0.961068855	0.038931145	0.754062839	0.811188811	0.78158338
207	1	0	1	1	1	0.79266055	0.20733945	0.9751693	0.808988764	0.884339816	0.961068855	0.038931145	0.754062839	0.811188811	0.78158338
207	1	0	1	1	1	0.79266055	0.20733945	0.9751693	0.808988764	0.884339816	0.961068855	0.038931145	0.754062839	0.811188811	0.78158338
207	1	0	1	1	1	0.79266055	0.20733945	0.9751693	0.808988764	0.884339816	0.961068855	0.038931145	0.754062839	0.811188811	0.78158338
207	1	0	1	1	1	0.79266055	0.20733945	0.9751693	0.808988764	0.884339816	0.961068855	0.038931145	0.754062839	0.811188811	0.78158338
207	1	0	1	1	1	0.79266055	0.20733945	0.9751693	0.808988764	0.884339816	0.961068855	0.038931145	0.754062839	0.811188811	0.78158338
207	1	0	1	1	1	0.79266055	0.20733945	0.9751693	0.808988764	0.884339816	0.961068855	0.038931145	0.754062839	0.811188811	0.78158338
207	1	0	1	1	1	0.79266055	0.20733945	0.9751693	0.808988764	0.884339816	0.961068855	0.038931145	0.754062839	0.811188811	0.78158338
207	1	0	1	1	1	0.79266055	0.20733945	0.9751693	0.808988764	0.884339816	0.961068855	0.038931145	0.754062839	0.811188811	0.78158338
207	1	0	1	1	1	0.79266055	0.20733945	0.9751693	0.808988764	0.884339816	0.961068855	0.038931145	0.754062839	0.811188811	0.78158338
207	1	0	1	1	1	0.79266055	0.20733945	0.9751693	0.808988764	0.884339816	0.961068855	0.038931145	0.754062839	0.811188811	0.78158338
207	1	0	1	1	1	0.79266055	0.20733945	0.9751693	0.808988764	0.884339816	0.961068855	0.038931145	0.754062839	0.811188811	0.78158338
207	1	0	1	1	1	0.79266055	0.20733945	0.9751693	0.808988764	0.884339816	0.961068855	0.038931145	0.754062839	0.811188811	0.78158338
207	1	0	1	1	1	0.79266055	0.20733945	0.9751693	0.808988764	0.884339816	0.961068855	0.038931145	0.754062839	0.811188811	0.78158338
207	1	0	1	1	1	0.79266055	0.20733945	0.9751693	0.808988764	0.884339816	0.961068855	0.038931145	0.754062839	0.811188811	0.78158338
207	1	0	1	1	1	0.79266055	0.20733945	0.9751693	0.808988764	0.884339816	0.961068855	0.038931145	0.754062839	0.811188811	0.78158338
207	1	0	1	1	1	0.79266055	0.20733945	0.9751693	0.808988764	0.884339816	0.961068855	0.038931145	0.754062839	0.811188811	0.78158338
207	1	0	1	1	1	0.79266055	0.20733945	0.9751693	0.808988764	0.884339816	0.961068855	0.038931145	0.754062839	0.811188811	0.78158338
207	1	0	1	1	1	0.79266055	0.20733945	0.9751693	0.808988764	0.884339816	0.961068855	0.038931145	0.754062839	0.811188811	0.78158338
207	1	0	1	1	1	0.79266055	0.20733945	0.9751693	0.808988764	0.884339816	0.961068855	0.038931145	0.754062839	0.811188811	0.78158338
207	1	0	1	1	1	0.79266055	0.20733945	0.9751693	0.808988764	0.884339816	0.961068855	0.038931145	0.754062839	0.811188811	0.78158338
207	1	0	1	1	1	0.79266055	0.20733945	0.9751693	0.808988764	0.884339816	0.961068855	0.038931145	0.754062839	0.811188811	0.78158338
207	1	0	1	1	1	0.79266055	0.20733945	0.9751693	0.808988764	0.884339816	0.961068855	0.038931145	0.754062839	0.811188811	0.78158338
207	1	0	1	1	1	0.79266055	0.20733945	0.9751693	0.808988764	0.884339816	0.961068855	0.038931145	0.754062839	0.811188811	0.78158338
207	1	0	1	1	1	0.79266055	0.20733945	0.9751693	0.808988764	0.884339816	0.961068855	0.038931145	0.754062839	0.811188811	0.78158338
207	1	0	1	1	1	0.79266055	0.20733945	0.9751693	0.808988764	0.884339816	0.961068855	0.038931145	0.754062839	0.811188811	0.78158338
207	1	0	1	1	1	0.79266055	0.20733945	0.9751693	0.808988764	0.884339816	0.961068855	0.038931145	0.754062839	0.811188811	0.78158338
207	1	0	1	1	1	0.79266055	0.20733945	0.9751693	0.808988764	0.884339816	0.961068855	0.038931145	0.754062839	0.811188811	0.78158338
207	1	0	1	1	1	0.79266055	0.20733945	0.9751693	0.808988764	0.884339816	0.961068855	0.038931145	0.754062839	0.811188811	0.78158338
207	1	0	1	1	1	0.79266055	0.20733945	0.9751693	0.808988764	0.884339816	0.961068855	0.038931145	0.754062839	0.811188811	0.78158338
207	1	0	1	1	1	0.79266055	0.20733945	0.9751693	0.808988764	0.884339816	0.961068855	0.038931145	0.754062839	0.811188811	0.78158338
207	1	0	1	1	1	0.79266055	0.20733945	0.9751693	0.808988764	0.884339816	0.961068855	0.038931145	0.754062839	0.811188811	0.78158338
207	1	0	1	1	1	0.79266055	0.20733945	0.9751693	0.808988764	0.884339816	0.961068855	0.038931145	0.754062839	0.811188811	0.78158338
207	1	0	1	1	1	0.79266055	0.20733945	0.9751693	0.808988764	0.884339816	0.961068855	0.038931145	0.754062839	0.811188811	0.78158338
207	1	0	1	1	1	0.79266055	0.20733945	0.9751693	0.808988764	0.884339816	0.961068855	0.038931145	0.754062839	0.811188811	0.78158338
207	1	0	1	1	1	0.79266055	0.20733945	0.9751693	0.808988764	0.884339816	0.961068855	0.038931145	0.754062839	0.811188811	0.78158338
207	1	0	1	1	1	0.79266055	0.20733945	0.9751693	0.808988764	0.884339816	0.961068855	0.038931145	0.754062839	0.811188811	0.78158338
207	1	0	1	1	1	0.79266055	0.20733945	0.9751693	0.808988764	0.884339816	0.961068855	0.038931145	0.754062839	0.811188811	0.78158338
207	1	0	1	1	1	0.79266055	0.20733945	0.9751693	0.808988764	0.884339816	0.961068855	0.038931145	0.754062839	0.811188811	0.78158338
207	1	0	1	1	1	0.79266055	0.20733945	0.9751693	0.808988764	0.884339816	0.961068855	0.038931145	0.754062839	0.811188811	0.78158338
207	1	0	1	1	1	0.79266055	0.20733945	0.9751693	0.808988764	0.884339816	0.961068855	0.038931145	0.754062839	0.811188811	0.78158338
207	1	0	1	1	1	0.79266055	0.20733945	0.9751693	0.808988764	0.884339816	0.961068855	0.038931145	0.754062839	0.811188811	0.78158338
207	1	0	1	1	1	0.79266055	0.20733945	0.9751693	0.808988764	0.884339816	0.961068855	0.038931145	0.754062839	0.811188811	0.78158338
207	1	0	1	1	1	0.79266055	0.20733945	0.9751693	0.808988764	0.884339816	0.961068855	0.038931145	0.754062839	0.811188811	0.78158338
207	1	0	1	1	1	0.79266055	0.20733945	0.9751693	0.808988764	0.884339816	0.961068855	0.038931145	0.754062839	0.811188811	0.78158338
207	1	0	1	1	1	0.79266055	0.20733945	0.9751693	0.808988764	0.884339816	0.961068855	0.038931145	0.754062839	0.811188811	0.78158338
207	1	0	1	1	1	0.79266055	0.20733945	0.9751693	0.808988764	0.884339816	0.961068855	0.038931145	0.754062839	0.811188811	0.78158338
207	1	0	1	1	1	0.79266055	0.20733945	0.9751693	0.808988764	0.884339816	0.961068855	0.038931145	0.754062839	0.811188811	0.78158338
207	1	0	1	1	1	0.79266055	0.20733945	0.9751693	0.808988764	0.884339816	0.961068855	0.038931145	0.754062839	0.811188811	0.78158338
207	1	0	1	1	1	0.79266055	0.20733945	0.9751693	0.808988764	0.884339816	0.961068855	0.038931145	0.754062839	0.811188811	0.78158338
207	1	0	1	1	1	0.79266055	0.20733945	0.9751693	0.808988764	0.884339816	0.961068855	0.038931145	0.754062839	0.811188811	0.78158338
207	1	0	1	1	1	0.79266055	0.20733945	0.9751693	0.808988764	0.884339816	0.961068855	0.038931145	0.754062839	0.811188811	0.78158338
207	1	0	1	1	1	0.79266055	0.20733945	0.9751693	0.808988764	0.884339816	0.961068855	0.038931145	0.754062839	0.811188811	0.78158338
207	1	0	1	1	1	0.79266055	0.20733945	0.9751693	0.808988764	0.884339816	0.961068855	0.038931145	0.754062839	0.811188811	0.78158338
207	1	0	1	1	1	0.79266055	0.20733945	0.9751693	0.808988764	0.884339816	0.961068855	0.038931145	0.754062839	0.811188811	0.78158338
207	1	0	1	1	1	0.79266055	0.20733945	0.9751693	0.808988764	0.884339816	0.961068855	0.038931145	0.754062839	0.811188811	0.78158338
207	1	0	1	1	1	0.79266055	0.20733945	0.9751693	0.808988764	0.884339816	0.961068855	0.038931145	0.754062839	0.811188811	0.78158338
207	1	0	1	1	1	0.79266055	0.20733945	0.9751693	0.808988764	0.884339816	0.961068855	0.038931145	0.754062839	0.811188811	0.78158338
207	1	0	1	1	1	0.79266055	0.20733945	0.9751693	0.808988764	0.884339816	0.961068855	0.038931145	0.754062839	0.811188811	0.78158338
207	1	0	1	1	1	0.79266055	0.20733945	0.9751693	0.808988764	0.884339816	0.961068855	0.038931145	0.754062839	0.811188811	0.78158338
207	1	0	1	1	1	0.79266055	0.20733945	0.9751693	0.808988764	0.884339816	0.961068855	0.038931145	0.754062839	0.811188811	0.78158338
207	1	0	1	1	1	0.79266055	0.20733945	0.9751693	0.808988764	0.884339816	0.961068855	0.038931145	0.754062839	0.811188811	0.78158338
207	1	0	1	1	1	0.79266055	0.20733945	0.9751693	0.808988764	0.884339816	0.961068855	0.038931145	0.754062839	0.811188811	0.78158338
207	1	0	1	1	1	0.79266055	0.20733945	0.9751693	0.808988764	0.884339816	0.961068855	0.038931145	0.754062839	0.811188811	0.78158338
207	1	0	1	1	1	0.79266055	0.20733945	0.9751693	0.808988764	0.884339816	0.961068855	0.038931145	0.754062839	0.811188811	0.78158338
207	1	0	1	1	1	0.79266055	0.20733945	0.9751693	0.808988764	0.884339816	0.961068855	0.038931145	0.754062839	0.811188811	0.78158338
207	1	0	1	1	1	0.79266055	0.20733945	0.9751693	0.808988764	0.884339816	0.961068855	0.038931145	0.754062839	0.811188811	0.78158338
207	1	0	1	1	1	0.79266055	0.20733945	0.9751693	0.808988764	0.884339816	0.961068855	0.038931145	0.754062839	0.811188811	0.78158338
207	1	0	1	1	1	0.79266055	0.20733945	0.9751693	0.808988764	0.884339816	0.961068855	0.038931145	0.754062839	0.811188811	0.78158338
207	1	0	1	1	1	0.79266055	0.20733945	0.9751693	0.808988764	0.884339816	0.961068855	0.038931145	0.754062839	0.811188811	0.78158338
207	1	0	1	1	1	0.79266055	0.20733945	0.9751693	0.808988764	0.884339816	0.961068855	0.038931145	0.754062839	0.811188811	0.78158338
207	1	0	1	1	1	0.79266055	0.20733945	0.9751693	0.808988764	0.884339816	0.961068855	0.038931145	0.754062839	0.811188811	0.78158338
207	1	0	1	1	1	0.79266055	0.20733945	0.9751693	0.808988764	0.884339816	0.961068855	0.038931145	0.754062839	0.811188811	0.78158338
207	1	0	1	1	1	0.79266055	0.20733945	0.9751693	0.808988764	0.884339816	0.961068855	0.038931145	0.754062839	0.811188811	0.78158338
207	1	0	1	1	1	0.79266055	0.20733945	0.9751693	0.808988764	0.884339816	0.961068855	0.038931145	0.754062839	0.811188811	0.78158338
207	1	0	1	1	1	0.79266055	0.20733945	0.9751693	0.808988764	0.884339816	0.961068855	0.038931145	0.754062839	0.811188811	0.78158338
207	1	0	1	1	1	0.79266055	0.20733945	0.9751693	0.808988764	0.884339816	0.961068855	0.038931145	0.754062839	0.811188811	0.78158338
207	1	0	1	1	1	0.79266055	0.20733945	0.9751693	0.808988764	0.884339816	0.961068855	0.038931145	0.754062839	0.811188811	0.78158338
207	1	0	1	1	1	0.79266055	0.20733945	0.9751693	0.808988764	0.884339816	0.961068855	0.038931145	0.754062839	0.811188811	0.78158338
207	1	0	1	1	1	0.79266055	0.20733945	0.9751693	0.808988764	0.884339816	0.961068855	0.038931145	0.754062839	0.811188811	0.78158338
207	1	0	1	1	1	0.79266055	0.20733945	0.9751693	0.808988764	0.884339816	0.961068855	0.038931145	0.754062839	0.811188811	0.78158338
207	1	0	1	1	1	0.79266055	0.20733945	0.9751693	0.808988764	0.884339816	0.961068855	0.038931145	0.754062839	0.811188811	0.78158338
207	1	0	1	1	1	0.79266055	0.20733945	0.9751693	0.808988764	0.884339816	0.961068855	0.038931145	0.754062839	0.811188811	0.78158338
207	1	0	1	1	1	0.79266055	0.20733945	0.9751693	0.808988764	0.884339816	0.961068855	0.038931145	0.754062839	0.811188811	0.78158338
207	1	0	1	1	1	0.79266055	0.20733945	0.9751693	0.808988764	0.884339816	0.961068855	0.038931145	0.754062839	0.811188811	0.78158338
207	1	0	1	1	1	0.79266055	0.20733945	0.9751693	0.808988764	0.884339816	0.961068855	0.038931145	0.754062839	0.811188811	0.78158338
207	1	0	1	1	1	0.79266055	0.20733945	0.9751693	0.808988764	0.884339816	0.961068855	0.038931145	0.754062839	0.811188811	0.78158338
207	1	0	1	1	1	0.79266055	0.20733945	0.9751693	0.808988764	0.884339816	0.961068855	0.038931145	0.754062839	0.811188811	0.78158338
207	1	0	1	1	1	0.79266055	0.20733945	0.9751693	0.808988764	0.884339816	0.961068855	0.038931145	0.754062839	0.811188811	0.78158338
207	1	0	1	1	1	0.79266055	0.20733945	0.9751693	0.808988764	0.884339816	0.961068855	0.038931145	0.754062839	0.811188811	0.78158338
207	1	0	1	1	1	0.79266055	0.20733945	0.9751693	0.808988764	0.884339816	0.961068855	0.038931145	0.754062839	0.811188811	0.78158338
207	1	0	1	1	1	0.79266055	0.20733945	0.9751693	0.808988764	0.884339816	0.961068855	0.038931145	0.754062839	0.811188811	0.78158338
207	1	0	1	1	1	0.79266055	0.20733945	0.9751693	0.808988764	0.884339816	0.961068855	0.038931145	0.754062839	0.811188811	0.78158338
206	1	0	1	1	1	0.795918367	0.204081633	0.975	0.8125	0.886363636	0.961688507	0.038311493	0.755319149	0.822711472	0.787576262
205	1	0	1	1	1	0.798148148	0.201851852	0.975113122	0.814744802	0.887744593	0.961584634	0.038415366	0.754255319	0.8225058	0.786903441
205	1	0	1	1	1	0.798148148	0.201851852	0.975113122	0.814744802	0.887744593	0.961584634	0.038415366	0.754255319	0.8225058	0.786903441
204	1	0	1	1	1	0.800738007	0.199261993	0.975280899	0.8173258	0.889344262	0.961677006	0.038322994	0.752916225	0.825581395	0.787576262
204	1	0	1	1	1	0.800738007	0.199261993	0.975280899	0.8173258	0.889344262	0.961677006	0.038322994	0.752916225	0.825581395	0.787576262
204	1	0	1	1	1	0.800738007	0.199261993	0.975280899	0.8173258	0.889344262	0.961677006	0.038322994	0.752916225	0.825581395	0.787576262
204	1	0	1	1	1	0.800738007	0.199261993	0.975280899	0.8173258	0.889344262	0.961677006	0.038322994	0.752916225	0.825581395	0.787576262
204	1	0	1	1	1	0.800738007	0.199261993	0.975280899	0.8173258	0.889344262	0.961677006	0.038322994	0.752916225	0.825581395	0.787576262
204	1	0	1	1	1	0.800738007	0.199261993	0.975280899	0.8173258	0.889344262	0.961677006	0.038322994	0.752916225	0.825581395	0.787576262
204	1	0	1	1	1	0.800738007	0.199261993	0.975280899	0.8173258	0.889344262	0.961677006	0.038322994	0.752916225	0.825581395	0.787576262
204	1	0	1	1	1	0.800738007	0.199261993	0.975280899	0.8173258	0.889344262	0.961677006	0.038322994	0.752916225	0.825581395	0.787576262
204	1	0	1	1	1	0.800738007	0.199261993	0.975280899	0.8173258	0.889344262	0.961677006	0.038322994	0.752916225	0.825581395	0.787576262
204	1	0	1	1	1	0.800738007	0.199261993	0.975280899	0.8173258	0.889344262	0.961677006	0.038322994	0.752916225	0.825581395	0.787576262
204	1	0	1	1	1	0.800738007	0.199261993	0.975280899	0.8173258	0.889344262	0.961677006	0.038322994	0.752916225	0.825581395	0.787576262
204	1	0	1	1	1	0.800738007	0.199261993	0.975280899	0.8173258	0.889344262	0.961677006	0.038322994	0.752916225	0.825581395	0.787576262
204	1	0	1	1	1	0.800738007	0.199261993	0.975280899	0.8173258	0.889344262	0.961677006	0.038322994	0.752916225	0.825581395	0.787576262
204	1	0	1	1	1	0.800738007	0.199261993	0.975280899	0.8173258	0.889344262	0.961677006	0.038322994	0.752916225	0.825581395	0.787576262
204	1	0	1	1	1	0.800738007	0.199261993	0.975280899	0.8173258	0.889344262	0.961677006	0.038322994	0.752916225	0.825581395	0.787576262
204	1	0	1	1	1	0.800738007	0.199261993	0.975280899	0.8173258	0.889344262	0.961677006	0.038322994	0.752916225	0.825581395	0.787576262
204	1	0	1	1	1	0.800738007	0.199261993	0.975280899	0.8173258	0.889344262	0.961677006	0.038322994	0.752916225	0.825581395	0.787576262
204	1	0	1	1	1	0.800738007	0.199261993	0.975280899	0.8173258	0.889344262	0.961677006	0.038322994	0.752916225	0.825581395	0.787576262
204	1	0	1	1	1	0.800738007	0.199261993	0.975280899	0.8173258	0.889344262	0.961677006	0.038322994	0.752916225	0.825581395	0.787576262
204	1	0	1	1	1	0.800738007	0.199261993	0.975280899	0.8173258	0.889344262	0.961677006	0.038322994	0.752916225	0.825581395	0.787576262
204	1	0	1	1	1	0.800738007	0.199261993	0.975280899	0.8173258	0.889344262	0.961677006	0.038322994	0.752916225	0.825581395	0.787576262
204	1	0	1	1	1	0.800738007	0.199261993	0.975280899	0.8173258	0.889344262	0.961677006	0.038322994	0.752916225	0.825581395	0.787576262
204	1	0	1	1	1	0.800738007	0.199261993	0.975280899	0.8173258	0.889344262	0.961677006	0.038322994	0.752916225	0.825581395	0.787576262
204	1	0	1	1	1	0.800738007	0.199261993	0.975280899	0.8173258	0.889344262	0.961677006	0.038322994	0.752916225	0.825581395	0.787576262
204	1	0	1	1	1	0.800738007	0.199261993	0.975280899	0.8173258	0.889344262	0.961677006	0.038322994	0.752916225	0.825581395	0.787576262
204	1	0	1	1	1	0.800738007	0.199261993	0.975280899	0.8173258	0.889344262	0.961677006	0.038322994	0.752916225	0.825581395	0.787576262
203	1	0	1	1	1	0.802325581	0.197674419	0.974117647	0.81980198	0.890322581	0.962977747	0.037022253	0.779826464	0.81059752	0.794914317
203	1	0	1	1	1	0.802325581	0.197674419	0.974117647	0.81980198	0.890322581	0.962977747	0.037022253	0.779826464	0.81059752	0.794914317
202	1	0	1	1	1	0.803883495	0.196116505	0.974117647	0.821428571	0.891280947	0.962981441	0.037018559	0.780065005	0.810810811	0.795140806
202	1	0	1	1	1	0.803883495	0.196116505	0.974117647	0.821428571	0.891280947	0.962981441	0.037018559	0.780065005	0.810810811	0.795140806
202	1	0	1	1	1	0.803883495	0.196116505	0.974117647	0.821428571	0.891280947	0.962981441	0.037018559	0.780065005	0.810810811	0.795140806
202	1	0	1	1	1	0.803883495	0.196116505	0.974117647	0.821428571	0.891280947	0.962981441	0.037018559	0.780065005	0.810810811	0.795140806
202	1	0	1	1	1	0.803883495	0.196116505	0.974117647	0.821428571	0.891280947	0.962981441	0.037018559	0.780065005	0.810810811	0.795140806
202	1	0	1	1	1	0.803883495	0.196116505	0.974117647	0.821428571	0.891280947	0.962981441	0.037018559	0.780065005	0.810810811	0.795140806
202	1	0	1	1	1	0.803883495	0.196116505	0.974117647	0.821428571	0.891280947	0.962981441	0.037018559	0.780065005	0.810810811	0.795140806
202	1	0	1	1	1	0.803883495	0.196116505	0.974117647	0.821428571	0.891280947	0.962981441	0.037018559	0.780065005	0.810810811	0.795140806
202	1	0	1	1	1	0.803883495	0.196116505	0.974117647	0.821428571	0.891280947	0.962981441	0.037018559	0.780065005	0.810810811	0.795140806
202	1	0	1	1	1	0.803883495	0.196116505	0.974117647	0.821428571	0.891280947	0.962981441	0.037018559	0.780065005	0.810810811	0.795140806
202	1	0	1	1	1	0.803883495	0.196116505	0.974117647	0.821428571	0.891280947	0.962981441	0.037018559	0.780065005	0.810810811	0.795140806
202	1	0	1	1	1	0.803883495	0.196116505	0.974117647	0.821428571	0.891280947	0.962981441	0.037018559	0.780065005	0.810810811	0.795140806
202	1	0	1	1	1	0.803883495	0.196116505	0.974117647	0.821428571	0.891280947	0.962981441	0.037018559	0.780065005	0.810810811	0.795140806
202	1	0	1	1	1	0.803883495	0.196116505	0.974117647	0.821428571	0.891280947	0.962981441	0.037018559	0.780065005	0.810810811	0.795140806
202	1	0	1	1	1	0.803883495	0.196116505	0.974117647	0.821428571	0.891280947	0.962981441	0.037018559	0.780065005	0.810810811	0.795140806
202	1	0	1	1	1	0.803883495	0.196116505	0.974117647	0.821428571	0.891280947	0.962981441	0.037018559	0.780065005	0.810810811	0.795140806
202	1	0	1	1	1	0.803883495	0.196116505	0.974117647	0.821428571	0.891280947	0.962981441	0.037018559	0.780065005	0.810810811	0.795140806
202	1	0	1	1	1	0.803883495	0.196116505	0.974117647	0.821428571	0.891280947	0.962981441	0.037018559	0.780065005	0.810810811	0.795140806
202	1	0	1	1	1	0.803883495	0.196116505	0.974117647	0.821428571	0.891280947	0.962981441	0.037018559	0.780065005	0.810810811	0.795140806
202	1	0	1	1	1	0.803883495	0.196116505	0.974117647	0.821428571	0.891280947	0.962981441	0.037018559	0.780065005	0.810810811	0.795140806
202	1	0	1	1	1	0.803883495	0.196116505	0.974117647	0.821428571	0.891280947	0.962981441	0.037018559	0.780065005	0.810810811	0.795140806
202	1	0	1	1	1	0.803883495	0.196116505	0.974117647	0.821428571	0.891280947	0.962981441	0.037018559	0.780065005	0.810810811	0.795140806
202	1	0	1	1	1	0.803883495	0.196116505	0.974117647	0.821428571	0.891280947	0.962981441	0.037018559	0.780065005	0.810810811	0.795140806
202	1	0	1	1	1	0.803883495	0.196116505	0.974117647	0.821428571	0.891280947	0.962981441	0.037018559	0.780065005	0.810810811	0.795140806
202	1	0	1	1	1	0.803883495	0.196116505	0.974117647	0.821428571	0.891280947	0.962981441	0.037018559	0.780065005	0.810810811	0.795140806
202	1	0	1	1	1	0.803883495	0.196116505	0.974117647	0.821428571	0.891280947	0.962981441	0.037018559	0.780065005	0.810810811	0.795140806
202	1	0	1	1	1	0.803883495	0.196116505	0.974117647	0.821428571	0.891280947	0.962981441	0.037018559	0.780065005	0.810810811	0.795140806
202	1	0	1	1	1	0.803883495	0.196116505	0.974117647	0.821428571	0.891280947	0.962981441	0.037018559	0.780065005	0.810810811	0.795140806
202	1	0	1	1	1	0.803883495	0.196116505	0.974117647	0.821428571	0.891280947	0.962981441	0.037018559	0.780065005	0.810810811	0.795140806
202	1	0	1	1	1	0.803883495	0.196116505	0.974117647	0.821428571	0.891280947	0.962981441	0.037018559	0.780065005	0.810810811	0.795140806
202	1	0	1	1	1	0.803883495	0.196116505	0.974117647	0.821428571	0.891280947	0.962981441	0.037018559	0.780065005	0.810810811	0.795140806
202	1	0	1	1	1	0.803883495	0.196116505	0.974117647	0.821428571	0.891280947	0.962981441	0.037018559	0.780065005	0.810810811	0.795140806
202	1	0	1	1	1	0.803883495	0.196116505	0.974117647	0.821428571	0.891280947	0.962981441	0.037018559	0.780065005	0.810810811	0.795140806
202	1	0	1	1	1	0.803883495	0.196116505	0.974117647	0.821428571	0.891280947	0.962981441	0.037018559	0.780065005	0.810810811	0.795140806
202	1	0	1	1	1	0.803883495	0.196116505	0.974117647	0.821428571	0.891280947	0.962981441	0.037018559	0.780065005	0.810810811	0.795140806
202	1	0	1	1	1	0.803883495	0.196116505	0.974117647	0.821428571	0.891280947	0.962981441	0.037018559	0.780065005	0.810810811	0.795140806
202	1	0	1	1	1	0.803883495	0.196116505	0.974117647	0.821428571	0.891280947	0.962981441	0.037018559	0.780065005	0.810810811	0.795140806
202	1	0	1	1	1	0.803883495	0.196116505	0.974117647	0.821428571	0.891280947	0.962981441	0.037018559	0.780065005	0.810810811	0.795140806
202	1	0	1	1	1	0.803883495	0.196116505	0.974117647	0.821428571	0.891280947	0.962981441	0.037018559	0.780065005	0.810810811	0.795140806
202	1	0	1	1	1	0.803883495	0.196116505	0.974117647	0.821428571	0.891280947	0.962981441	0.037018559	0.780065005	0.810810811	0.795140806
202	1	0	1	1	1	0.803883495	0.196116505	0.974117647	0.821428571	0.891280947	0.962981441	0.037018559	0.780065005	0.810810811	0.795140806
202	1	0	1	1	1	0.803883495	0.196116505	0.974117647	0.821428571	0.891280947	0.962981441	0.037018559	0.780065005	0.810810811	0.795140806
202	1	0	1	1	1	0.803883495	0.196116505	0.974117647	0.821428571	0.891280947	0.962981441	0.037018559	0.780065005	0.810810811	0.795140806
202	1	0	1	1	1	0.803883495	0.196116505	0.974117647	0.821428571	0.891280947	0.962981441	0.037018559	0.780065005	0.810810811	0.795140806
202	1	0	1	1	1	0.803883495	0.196116505	0.974117647	0.821428571	0.891280947	0.962981441	0.037018559	0.780065005	0.810810811	0.795140806
202	1	0	1	1	1	0.803883495	0.196116505	0.974117647	0.821428571	0.891280947	0.962981441	0.037018559	0.780065005	0.810810811	0.795140806
202	1	0	1	1	1	0.803883495	0.196116505	0.974117647	0.821428571	0.891280947	0.962981441	0.037018559	0.780065005	0.810810811	0.795140806
202	1	0	1	1	1	0.803883495	0.196116505	0.974117647	0.821428571	0.891280947	0.962981441	0.037018559	0.780065005	0.810810811	0.795140806
202	1	0	1	1	1	0.803883495	0.196116505	0.974117647	0.821428571	0.891280947	0.962981441	0.037018559	0.780065005	0.810810811	0.795140806
202	1	0	1	1	1	0.803883495	0.196116505	0.974117647	0.821428571	0.891280947	0.962981441	0.037018559	0.780065005	0.810810811	0.795140806
202	1	0	1	1	1	0.803883495	0.196116505	0.974117647	0.821428571	0.891280947	0.962981441	0.037018559	0.780065005	0.810810811	0.795140806
202	1	0	1	1	1	0.803883495	0.196116505	0.974117647	0.821428571	0.891280947	0.962981441	0.037018559	0.780065005	0.810810811	0.795140806
202	1	0	1	1	1	0.803883495	0.196116505	0.974117647	0.821428571	0.891280947	0.962981441	0.037018559	0.780065005	0.810810811	0.795140806
202	1	0	1	1	1	0.803883495	0.196116505	0.974117647	0.821428571	0.891280947	0.962981441	0.037018559	0.780065005	0.810810811	0.795140806
202	1	0	1	1	1	0.803883495	0.196116505	0.974117647	0.821428571	0.891280947	0.962981441	0.037018559	0.780065005	0.810810811	0.795140806
202	1	0	1	1	1	0.803883495	0.196116505	0.974117647	0.821428571	0.891280947	0.962981441	0.037018559	0.780065005	0.810810811	0.795140806
202	1	0	1	1	1	0.803883495	0.196116505	0.974117647	0.821428571	0.891280947	0.962981441	0.037018559	0.780065005	0.810810811	0.795140806
202	1	0	1	1	1	0.803883495	0.196116505	0.974117647	0.821428571	0.891280947	0.962981441	0.037018559	0.780065005	0.810810811	0.795140806
202	1	0	1	1	1	0.803883495	0.196116505	0.974117647	0.821428571	0.891280947	0.962981441	0.037018559	0.780065005	0.810810811	0.795140806
202	1	0	1	1	1	0.803883495	0.196116505	0.974117647	0.821428571	0.891280947	0.962981441	0.037018559	0.780065005	0.810810811	0.795140806
202	1	0	1	1	1	0.803883495	0.196116505	0.974117647	0.821428571	0.891280947	0.962981441	0.037018559	0.780065005	0.810810811	0.795140806
202	1	0	1	1	1	0.803883495	0.196116505	0.974117647	0.821428571	0.891280947	0.962981441	0.037018559	0.780065005	0.810810811	0.795140806
202	1	0	1	1	1	0.803883495	0.196116505	0.974117647	0.821428571	0.891280947	0.962981441	0.037018559	0.780065005	0.810810811	0.795140806
202	1	0	1	1	1	0.803883495	0.196116505	0.974117647	0.821428571	0.891280947	0.962981441	0.037018559	0.780065005	0.810810811	0.795140806
202	1	0	1	1	1	0.803883495	0.196116505	0.974117647	0.821428571	0.891280947	0.962981441	0.037018559	0.780065005	0.810810811	0.795140806
202	1	0	1	1	1	0.803883495	0.196116505	0.974117647	0.821428571	0.891280947	0.962981441	0.037018559	0.780065005	0.810810811	0.795140806
202	1	0	1	1	1	0.803883495	0.196116505	0.974117647	0.821428571	0.891280947	0.962981441	0.037018559	0.780065005	0.810810811	0.795140806
202	1	0	1	1	1	0.803883495	0.196116505	0.974117647	0.821428571	0.891280947	0.962981441	0.037018559	0.780065005	0.810810811	0.795140806
202	1	0	1	1	1	0.803883495	0.196116505	0.974117647	0.821428571	0.891280947	0.962981441	0.037018559	0.780065005	0.810810811	0.795140806
202	1	0	1	1	1	0.803883495	0.196116505	0.974117647	0.821428571	0.891280947	0.962981441	0.037018559	0.780065005	0.810810811	0.795140806
202	1	0	1	1	1	0.803883495	0.196116505	0.974117647	0.821428571	0.891280947	0.962981441	0.037018559	0.780065005	0.810810811	0.795140806
202	1	0	1	1	1	0.803883495	0.196116505	0.974117647	0.821428571	0.891280947	0.962981441	0.037018559	0.780065005	0.810810811	0.795140806
202	1	0	1	1	1	0.803883495	0.196116505	0.974117647	0.821428571	0.891280947	0.962981441	0.037018559	0.780065005	0.810810811	0.795140806
202	1	0	1	1	1	0.803883495	0.196116505	0.974117647	0.821428571	0.891280947	0.962981441	0.037018559	0.780065005	0.810810811	0.795140806
202	1	0	1	1	1	0.803883495	0.196116505	0.974117647	0.821428571	0.891280947	0.962981441	0.037018559	0.780065005	0.810810811	0.795140806
202	1	0	1	1	1	0.803883495	0.196116505	0.974117647	0.821428571	0.891280947	0.962981441	0.037018559	0.780065005	0.810810811	0.795140806
202	1	0	1	1	1	0.803883495	0.196116505	0.974117647	0.821428571	0.891280947	0.962981441	0.037018559	0.780065005	0.810810811	0.795140806
202	1	0	1	1	1	0.803883495	0.196116505	0.974117647	0.821428571	0.891280947	0.962981441	0.037018559	0.780065005	0.810810811	0.795140806
202	1	0	1	1	1	0.803883495	0.196116505	0.974117647	0.821428571	0.891280947	0.962981441	0.037018559	0.780065005	0.810810811	0.795140806
202	1	0	1	1	1	0.803883495	0.196116505	0.974117647	0.821428571	0.891280947	0.962981441	0.037018559	0.780065005	0.810810811	0.795140806
202	1	0	1	1	1	0.803883495	0.196116505	0.974117647	0.821428571	0.891280947	0.962981441	0.037018559	0.780065005	0.810810811	0.795140806
202	1	0	1	1	1	0.803883495	0.196116505	0.974117647	0.821428571	0.891280947	0.962981441	0.037018559	0.780065005	0.810810811	0.795140806
202	1	0	1	1	1	0.803883495	0.196116505	0.974117647	0.821428571	0.891280947	0.962981441	0.037018559	0.780065005	0.810810811	0.795140806
202	1	0	1	1	1	0.803883495	0.196116505	0.974117647	0.821428571	0.891280947	0.962981441	0.037018559	0.780065005	0.810810811	0.795140806
202	1	0	1	1	1	0.803883495	0.196116505	0.974117647	0.821428571	0.891280947	0.962981441	0.037018559	0.780065005	0.810810811	0.795140806
202	1	0	1	1	1	0.803883495	0.196116505	0.974117647	0.821428571	0.891280947	0.962981441	0.037018559	0.780065005	0.810810811	0.795140806
202	1	0	1	1	1	0.803883495	0.196116505	0.974117647	0.821428571	0.891280947	0.962981441	0.037018559	0.780065005	0.810810811	0.795140806
202	1	0	1	1	1	0.803883495	0.196116505	0.974117647	0.821428571	0.891280947	0.962981441	0.037018559	0.780065005	0.810810811	0.795140806
202	1	0	1	1	1	0.803883495	0.196116505	0.974117647	0.821428571	0.891280947	0.962981441	0.037018559	0.780065005	0.810810811	0.795140806
202	1	0	1	1	1	0.803883495	0.196116505	0.974117647	0.821428571	0.891280947	0.962981441	0.037018559	0.780065005	0.810810811	0.795140806
202	1	0	1	1	1	0.803883495	0.196116505	0.974117647	0.821428571	0.891280947	0.962981441	0.037018559	0.780065005	0.810810811	0.795140806
202	1	0	1	1	1	0.803883495	0.196116505	0.974117647	0.821428571	0.891280947	0.962981441	0.037018559	0.780065005	0.810810811	0.795140806
202	1	0	1	1	1	0.803883495	0.196116505	0.974117647	0.821428571	0.891280947	0.962981441	0.037018559	0.780065005	0.810810811	0.795140806
202	1	0	1	1	1	0.803883495	0.196116505	0.974117647	0.821428571	0.891280947	0.962981441	0.037018559	0.780065005	0.810810811	0.795140806
202	1	0	1	1	1	0.803883495	0.196116505	0.974117647	0.821428571	0.891280947	0.962981441	0.037018559	0.780065005	0.810810811	0.795140806
202	1	0	1	1	1	0.803883495	0.196116505	0.974117647	0.821428571	0.891280947	0.962981441	0.037018559	0.780065005	0.810810811	0.795140806
202	1	0	1	1	1	0.803883495	0.196116505	0.974117647	0.821428571	0.891280947	0.962981441	0.037018559	0.780065005	0.810810811	0.795140806
202	1	0	1	1	1	0.803883495	0.196116505	0.974117647	0.821428571	0.891280947	0.962981441	0.037018559	0.780065005	0.810810811	0.795140806
202	1	0	1	1	1	0.803883495	0.196116505	0.974117647	0.821428571	0.891280947	0.962981441	0.037018559	0.780065005	0.810810811	0.795140806
202	1	0	1	1	1	0.803883495	0.196116505	0.974117647	0.821428571	0.891280947	0.962981441	0.037018559	0.780065005	0.810810811	0.795140806
202	1	0	1	1	1	0.803883495	0.196116505	0.974117647	0.821428571	0.891280947	0.962981441	0.037018559	0.780065005	0.810810811	0.795140806
202	1	0	1	1	1	0.803883495	0.196116505	0.974117647	0.821428571	0.891280947	0.962981441	0.037018559	0.780065005	0.810810811	0.795140806
202	1	0	1	1	1	0.803883495	0.196116505	0.974117647	0.821428571	0.891280947	0.962981441	0.037018559	0.780065005	0.810810811	0.795140806
202	1	0	1	1	1	0.803883495	0.196116505	0.974117647	0.821428571	0.891280947	0.962981441	0.037018559	0.780065005	0.810810811	0.795140806
202	1	0	1	1	1	0.803883495	0.196116505	0.974117647	0.821428571	0.891280947	0.962981441	0.037018559	0.780065005	0.810810811	0.795140806
202	1	0	1	1	1	0.803883495	0.196116505	0.974117647	0.821428571	0.891280947	0.962981441	0.037018559	0.780065005	0.810810811	0.795140806
202	1	0	1	1	1	0.803883495	0.196116505	0.974117647	0.821428571	0.891280947	0.962981441	0.037018559	0.780065005	0.810810811	0.795140806
202	1	0	1	1	1	0.803883495	0.196116505	0.974117647	0.821428571	0.891280947	0.962981441	0.037018559	0.780065005	0.810810811	0.795140806
202	1	0	1	1	1	0.803883495	0.196116505	0.974117647	0.821428571	0.891280947	0.962981441	0.037018559	0.780065005	0.810810811	0.795140806
202	1	0	1	1	1	0.803883495	0.196116505	0.974117647	0.821428571	0.891280947	0.962981441	0.037018559	0.780065005	0.810810811	0.795140806
202	1	0	1	1	1	0.803883495	0.196116505	0.974117647	0.821428571	0.891280947	0.962981441	0.037018559	0.780065005	0.810810811	0.795140806
202	1	0	1	1	1	0.803883495	0.196116505	0.974117647	0.821428571	0.891280947	0.962981441	0.037018559	0.780065005	0.810810811	0.795140806
202	1	0	1	1	1	0.803883495	0.196116505	0.974117647	0.821428571	0.891280947	0.962981441	0.037018559	0.780065005	0.810810811	0.795140806
202	1	0	1	1	1	0.803883495	0.196116505	0.974117647	0.821428571	0.891280947	0.962981441	0.037018559	0.780065005	0.810810811	0.795140806
202	1	0	1	1	1	0.803883495	0.196116505	0.974117647	0.821428571	0.891280947	0.962981441	0.037018559	0.780065005	0.810810811	0.795140806
202	1	0	1	1	1	0.803883495	0.196116505	0.974117647	0.821428571	0.891280947	0.962981441	0.037018559	0.780065005	0.810810811	0.795140806
202	1	0	1	1	1	0.803883495	0.196116505	0.974117647	0.821428571	0.891280947	0.962981441	0.037018559	0.780065005	0.810810811	0.795140806
202	1	0	1	1	1	0.803883495	0.196116505	0.974117647	0.821428571	0.891280947	0.962981441	0.037018559	0.780065005	0.810810811	0.795140806
202	1	0	1	1	1	0.803883495	0.196116505	0.974117647	0.821428571	0.891280947	0.962981441	0.037018559	0.780065005	0.810810811	0.795140806
202	1	0	1	1	1	0.803883495	0.196116505	0.974117647	0.821428571	0.891280947	0.962981441	0.037018559	0.780065005	0.810810811	0.795140806
202	1	0	1	1	1	0.803883495	0.196116505	0.974117647	0.821428571	0.891280947	0.962981441	0.037018559	0.780065005	0.810810811	0.795140806
202	1	0	1	1	1	0.803883495	0.196116505	0.974117647	0.821428571	0.891280947	0.962981441	0.037018559	0.780065005	0.810810811	0.795140806
202	1	0	1	1	1	0.803883495	0.196116505	0.974117647	0.821428571	0.891280947	0.962981441	0.037018559	0.780065005	0.810810811	0.795140806
202	1	0	1	1	1	0.803883495	0.196116505	0.974117647	0.821428571	0.891280947	0.962981441	0.037018559	0.780065005	0.810810811	0.795140806
202	1	0	1	1	1	0.803883495	0.196116505	0.974117647	0.821428571	0.891280947	0.962981441	0.037018559	0.780065005	0.810810811	0.795140806
202	1	0	1	1	1	0.803883495	0.196116505	0.974117647	0.821428571	0.891280947	0.962981441	0.037018559	0.780065005	0.810810811	0.795140806
202	1	0	1	1	1	0.803883495	0.196116505	0.974117647	0.821428571	0.891280947	0.962981441	0.037018559	0.780065005	0.810810811	0.795140806
202	1	0	1	1	1	0.803883495	0.196116505	0.974117647	0.821428571	0.891280947	0.962981441	0.037018559	0.780065005	0.810810811	0.795140806
202	1	0	1	1	1	0.803883495	0.196116505	0.974117647	0.821428571	0.891280947	0.962981441	0.037018559	0.780065005	0.810810811	0.795140806
202	1	0	1	1	1	0.803883495	0.196116505	0.974117647	0.821428571	0.891280947	0.962981441	0.037018559	0.780065005	0.810810811	0.795140806
202	1	0	1	1	1	0.803883495	0.196116505	0.974117647	0.821428571	0.891280947	0.962981441	0.037018559	0.780065005	0.810810811	0.795140806
202	1	0	1	1	1	0.803883495	0.196116505	0.974117647	0.821428571	0.891280947	0.962981441	0.037018559	0.780065005	0.810810811	0.795140806
202	1	0	1	1	1	0.803883495	0.196116505	0.974117647	0.821428571	0.891280947	0.962981441	0.037018559	0.780065005	0.810810811	0.795140806
202	1	0	1	1	1	0.803883495	0.196116505	0.974117647	0.821428571	0.891280947	0.962981441	0.037018559	0.780065005	0.810810811	0.795140806
202	1	0	1	1	1	0.803883495	0.196116505	0.974117647	0.821428571	0.891280947	0.962981441	0.037018559	0.780065005	0.810810811	0.795140806
202	1	0	1	1	1	0.803883495	0.196116505	0.974117647	0.821428571	0.891280947	0.962981441	0.037018559	0.780065005	0.810810811	0.795140806
202	1	0	1	1	1	0.803883495	0.196116505	0.974117647	0.821428571	0.891280947	0.962981441	0.037018559	0.780065005	0.810810811	0.795140806
202	1	0	1	1	1	0.803883495	0.196116505	0.974117647	0.821428571	0.891280947	0.962981441	0.037018559	0.780065005	0.810810811	0.795140806
202	1	0	1	1	1	0.803883495	0.196116505	0.974117647	0.821428571	0.891280947	0.962981441	0.037018559	0.780065005	0.810810811	0.795140806
202	1	0	1	1	1	0.803883495	0.196116505	0.974117647	0.821428571	0.891280947	0.962981441	0.037018559	0.780065005	0.810810811	0.795140806
202	1	0	1	1	1	0.803883495	0.196116505	0.974117647	0.821428571	0.891280947	0.962981441	0.037018559	0.780065005	0.810810811	0.795140806
202	1	0	1	1	1	0.803883495	0.196116505	0.974117647	0.821428571	0.891280947	0.962981441	0.037018559	0.780065005	0.810810811	0.795140806
202	1	0	1	1	1	0.803883495	0.196116505	0.974117647	0.821428571	0.891280947	0.962981441	0.037018559	0.780065005	0.810810811	0.795140806
202	1	0	1	1	1	0.803883495	0.196116505	0.974117647	0.821428571	0.891280947	0.962981441	0.037018559	0.780065005	0.810810811	0.795140806
202	1	0	1	1	1	0.803883495	0.196116505	0.974117647	0.821428571	0.891280947	0.962981441	0.037018559	0.780065005	0.810810811	0.795140806
202	1	0	1	1	1	0.803883495	0.196116505	0.974117647	0.821428571	0.891280947	0.962981441	0.037018559	0.780065005	0.810810811	0.795140806
202	1	0	1	1	1	0.803883495	0.196116505	0.974117647	0.821428571	0.891280947	0.962981441	0.037018559	0.780065005	0.810810811	0.795140806
202	1	0	1	1	1	0.803883495	0.196116505	0.974117647	0.821428571	0.891280947	0.962981441	0.037018559	0.780065005	0.810810811	0.795140806
202	1	0	1	1	1	0.803883495	0.196116505	0.974117647	0.821428571	0.891280947	0.962981441	0.037018559	0.780065005	0.810810811	0.795140806
202	1	0	1	1	1	0.803883495	0.196116505	0.974117647	0.821428571	0.891280947	0.962981441	0.037018559	0.780065005	0.810810811	0.795140806
202	1	0	1	1	1	0.803883495	0.196116505	0.974117647	0.821428571	0.891280947	0.962981441	0.037018559	0.780065005	0.810810811	0.795140806
202	1	0	1	1	1	0.803883495	0.196116505	0.974117647	0.821428571	0.891280947	0.962981441	0.037018559	0.780065005	0.810810811	0.795140806
202	1	0	1	1	1	0.803883495	0.196116505	0.974117647	0.821428571	0.891280947	0.962981441	0.037018559	0.780065005	0.810810811	0.795140806
202	1	0	1	1	1	0.803883495	0.196116505	0.974117647	0.821428571	0.891280947	0.962981441	0.037018559	0.780065005	0.810810811	0.795140806
202	1	0	1	1	1	0.803883495	0.196116505	0.974117647	0.821428571	0.891280947	0.962981441	0.037018559	0.780065005	0.810810811	0.795140806
202	1	0	1	1	1	0.803883495	0.196116505	0.974117647	0.821428571	0.891280947	0.962981441	0.037018559	0.780065005	0.810810811	0.795140806
202	1	0	1	1	1	0.803883495	0.196116505	0.974117647	0.821428571	0.891280947	0.962981441	0.037018559	0.780065005	0.810810811	0.795140806
202	1	0	1	1	1	0.803883495	0.196116505	0.974117647	0.821428571	0.891280947	0.962981441	0.037018559	0.780065005	0.810810811	0.795140806
202	1	0	1	1	1	0.803883495	0.196116505	0.974117647	0.821428571	0.891280947	0.962981441	0.037018559	0.780065005	0.810810811	0.795140806
202	1	0	1	1	1	0.803883495	0.196116505	0.974117647	0.821428571	0.891280947	0.962981441	0.037018559	0.780065005	0.810810811	0.795140806
202	1	0	1	1	1	0.803883495	0.196116505	0.974117647	0.821428571	0.891280947	0.962981441	0.037018559	0.780065005	0.810810811	0.795140806
202	1	0	1	1	1	0.803883495	0.196116505	0.974117647	0.821428571	0.891280947	0.962981441	0.037018559	0.780065005	0.810810811	0.795140806
202	1	0	1	1	1	0.803883495	0.196116505	0.974117647	0.821428571	0.891280947	0.962981441	0.037018559	0.780065005	0.810810811	0.795140806
202	1	0	1	1	1	0.803883495	0.196116505	0.974117647	0.821428571	0.891280947	0.962981441	0.037018559	0.780065005	0.810810811	0.795140806
202	1	0	1	1	1	0.803883495	0.196116505	0.974117647	0.821428571	0.891280947	0.962981441	0.037018559	0.780065005	0.810810811	0.795140806
202	1	0	1	1	1	0.803883495	0.196116505	0.974117647	0.821428571	0.891280947	0.962981441	0.037018559	0.780065005	0.810810811	0.795140806
202	1	0	1	1	1	0.803883495	0.196116505	0.974117647	0.821428571	0.891280947	0.962981441	0.037018559	0.780065005	0.810810811	0.795140806
202	1	0	1	1	1	0.803883495	0.196116505	0.974117647	0.821428571	0.891280947	0.962981441	0.037018559	0.780065005	0.810810811	0.795140806
202	1	0	1	1	1	0.803883495	0.196116505	0.974117647	0.821428571	0.891280947	0.962981441	0.037018559	0.780065005	0.810810811	0.795140806
202	1	0	1	1	1	0.803883495	0.196116505	0.974117647	0.821428571	0.891280947	0.962981441	0.037018559	0.780065005	0.810810811	0.795140806
202	1	0	1	1	1	0.803883495	0.196116505	0.974117647	0.821428571	0.891280947	0.962981441	0.037018559	0.780065005	0.810810811	0.795140806
202	1	0	1	1	1	0.803883495	0.196116505	0.974117647	0.821428571	0.891280947	0.962981441	0.037018559	0.780065005	0.810810811	0.795140806
202	1	0	1	1	1	0.803883495	0.196116505	0.974117647	0.821428571	0.891280947	0.962981441	0.037018559	0.780065005	0.810810811	0.795140806
202	1	0	1	1	1	0.803883495	0.196116505	0.974117647	0.821428571	0.891280947	0.962981441	0.037018559	0.780065005	0.810810811	0.795140806
202	1	0	1	1	1	0.803883495	0.196116505	0.974117647	0.821428571	0.891280947	0.962981441	0.037018559	0.780065005	0.810810811	0.795140806
202	1	0	1	1	1	0.803883495	0.196116505	0.974117647	0.821428571	0.891280947	0.962981441	0.037018559	0.780065005	0.810810811	0.795140806
202	1	0	1	1	1	0.803883495	0.196116505	0.974117647	0.821428571	0.891280947	0.962981441	0.037018559	0.780065005	0.810810811	0.795140806
202	1	0	1	1	1	0.803883495	0.196116505	0.974117647	0.821428571	0.891280947	0.962981441	0.037018559	0.780065005	0.810810811	0.795140806
202	1	0	1	1	1	0.803883495	0.196116505	0.974117647	0.821428571	0.891280947	0.962981441	0.037018559	0.780065005	0.810810811	0.795140806
202	1	0	1	1	1	0.803883495	0.196116505	0.974117647	0.821428571	0.891280947	0.962981441	0.037018559	0.780065005	0.810810811	0.795140806
202	1	0	1	1	1	0.803883495	0.196116505	0.974117647	0.821428571	0.891280947	0.962981441	0.037018559	0.780065005	0.810810811	0.795140806
202	1	0	1	1	1	0.803883495	0.196116505	0.974117647	0.821428571	0.891280947	0.962981441	0.037018559	0.780065005	0.810810811	0.795140806
202	1	0	1	1	1	0.803883495	0.196116505	0.974117647	0.821428571	0.891280947	0.962981441	0.037018559	0.780065005	0.810810811	0.795140806
202	1	0	1	1	1	0.803883495	0.196116505	0.974117647	0.821428571	0.891280947	0.962981441	0.037018559	0.780065005	0.810810811	0.795140806
202	1	0	1	1	1	0.803883495	0.196116505	0.974117647	0.821428571	0.891280947	0.962981441	0.037018559	0.780065005	0.810810811	0.795140806
202	1	0	1	1	1	0.803883495	0.196116505	0.974117647	0.821428571	0.891280947	0.962981441	0.037018559	0.780065005	0.810810811	0.795140806
202	1	0	1	1	1	0.803883495	0.196116505	0.974117647	0.821428571	0.891280947	0.962981441	0.037018559	0.780065005	0.810810811	0.795140806
202	1	0	1	1	1	0.803883495	0.196116505	0.974117647	0.821428571	0.891280947	0.962981441	0.037018559	0.780065005	0.810810811	0.795140806
202	1	0	1	1	1	0.803883495	0.196116505	0.974117647	0.821428571	0.891280947	0.962981441	0.037018559	0.780065005	0.810810811	0.795140806
202	1	0	1	1	1	0.803883495	0.196116505	0.974117647	0.821428571	0.891280947	0.962981441	0.037018559	0.780065005	0.810810811	0.795140806
202	1	0	1	1	1	0.803883495	0.196116505	0.974117647	0.821428571	0.891280947	0.962981441	0.037018559	0.780065005	0.810810811	0.795140806
202	1	0	1	1	1	0.803883495	0.196116505	0.974117647	0.821428571	0.891280947	0.962981441	0.037018559	0.780065005	0.810810811	0.795140806
202	1	0	1	1	1	0.803883495	0.196116505	0.974117647	0.821428571	0.891280947	0.962981441	0.037018559	0.780065005	0.810810811	0.795140806
202	1	0	1	1	1	0.803883495	0.196116505	0.974117647	0.821428571	0.891280947	0.962981441	0.037018559	0.780065005	0.810810811	0.795140806
202	1	0	1	1	1	0.803883495	0.196116505	0.974117647	0.821428571	0.891280947	0.962981441	0.037018559	0.780065005	0.810810811	0.795140806
202	1	0	1	1	1	0.803883495	0.196116505	0.974117647	0.821428571	0.891280947	0.962981441	0.037018559	0.780065005	0.810810811	0.795140806
202	1	0	1	1	1	0.803883495	0.196116505	0.974117647	0.821428571	0.891280947	0.962981441	0.037018559	0.780065005	0.810810811	0.795140806
202	1	0	1	1	1	0.803883495	0.196116505	0.974117647	0.821428571	0.891280947	0.962981441	0.037018559	0.780065005	0.810810811	0.795140806
202	1	0	1	1	1	0.803883495	0.196116505	0.974117647	0.821428571	0.891280947	0.962981441	0.037018559	0.780065005	0.810810811	0.795140806
202	1	0	1	1	1	0.803883495	0.196116505	0.974117647	0.821428571	0.891280947	0.962981441	0.037018559	0.780065005	0.810810811	0.795140806
202	1	0	1	1	1	0.803883495	0.196116505	0.974117647	0.821428571	0.891280947	0.962981441	0.037018559	0.780065005	0.810810811	0.795140806
202	1	0	1	1	1	0.803883495	0.196116505	0.974117647	0.821428571	0.891280947	0.962981441	0.037018559	0.780065005	0.810810811	0.795140806
202	1	0	1	1	1	0.803883495	0.196116505	0.974117647	0.821428571	0.891280947	0.962981441	0.037018559	0.780065005	0.810810811	0.795140806
202	1	0	1	1	1	0.803883495	0.196116505	0.974117647	0.821428571	0.891280947	0.962981441	0.037018559	0.780065005	0.810810811	0.795140806
202	1	0	1	1	1	0.803883495	0.196116505	0.974117647	0.821428571	0.891280947	0.962981441	0.037018559	0.780065005	0.810810811	0.795140806
202	1	0	1	1	1	0.803883495	0.196116505	0.974117647	0.821428571	0.891280947	0.962981441	0.037018559	0.780065005	0.810810811	0.795140806
202	1	0	1	1	1	0.803883495	0.196116505	0.974117647	0.821428571	0.891280947	0.962981441	0.037018559	0.780065005	0.810810811	0.795140806
202	1	0	1	1	1	0.803883495	0.196116505	0.974117647	0.821428571	0.891280947	0.962981441	0.037018559	0.780065005	0.810810811	0.795140806
202	1	0	1	1	1	0.803883495	0.196116505	0.974117647	0.821428571	0.891280947	0.962981441	0.037018559	0.780065005	0.810810811	0.795140806
202	1	0	1	1	1	0.803883495	0.196116505	0.974117647	0.821428571	0.891280947	0.962981441	0.037018559	0.780065005	0.810810811	0.795140806
202	1	0	1	1	1	0.803883495	0.196116505	0.974117647	0.821428571	0.891280947	0.962981441	0.037018559	0.780065005	0.810810811	0.795140806
202	1	0	1	1	1	0.803883495	0.196116505	0.974117647	0.821428571	0.891280947	0.962981441	0.037018559	0.780065005	0.810810811	0.795140806
202	1	0	1	1	1	0.803883495	0.196116505	0.974117647	0.821428571	0.891280947	0.962981441	0.037018559	0.780065005	0.810810811	0.795140806
202	1	0	1	1	1	0.803883495	0.196116505	0.974117647	0.821428571	0.891280947	0.962981441	0.037018559	0.780065005	0.810810811	0.795140806
202	1	0	1	1	1	0.803883495	0.196116505	0.974117647	0.821428571	0.891280947	0.962981441	0.037018559	0.780065005	0.810810811	0.795140806
202	1	0	1	1	1	0.803883495	0.196116505	0.974117647	0.821428571	0.891280947	0.962981441	0.037018559	0.780065005	0.810810811	0.795140806
202	1	0	1	1	1	0.803883495	0.196116505	0.974117647	0.821428571	0.891280947	0.962981441	0.037018559	0.780065005	0.810810811	0.795140806
202	1	0	1	1	1	0.803883495	0.196116505	0.974117647	0.821428571	0.891280947	0.962981441	0.037018559	0.780065005	0.810810811	0.795140806
202	1	0	1	1	1	0.803883495	0.196116505	0.974117647	0.821428571	0.891280947	0.962981441	0.037018559	0.780065005	0.810810811	0.795140806
202	1	0	1	1	1	0.803883495	0.196116505	0.974117647	0.821428571	0.891280947	0.962981441	0.037018559	0.780065005	0.810810811	0.795140806
202	1	0	1	1	1	0.803883495	0.196116505	0.974117647	0.821428571	0.891280947	0.962981441	0.037018559	0.780065005	0.810810811	0.795140806
202	1	0	1	1	1	0.803883495	0.196116505	0.974117647	0.821428571	0.891280947	0.962981441	0.037018559	0.780065005	0.810810811	0.795140806
202	1	0	1	1	1	0.803883495	0.196116505	0.974117647	0.821428571	0.891280947	0.962981441	0.037018559	0.780065005	0.810810811	0.795140806
202	1	0	1	1	1	0.803883495	0.196116505	0.974117647	0.821428571	0.891280947	0.962981441	0.037018559	0.780065005	0.810810811	0.795140806
202	1	0	1	1	1	0.803883495	0.196116505	0.974117647	0.821428571	0.891280947	0.962981441	0.037018559	0.780065005	0.810810811	0.795140806
202	1	0	1	1	1	0.803883495	0.196116505	0.974117647	0.821428571	0.891280947	0.962981441	0.037018559	0.780065005	0.810810811	0.795140806
202	1	0	1	1	1	0.803883495	0.196116505	0.974117647	0.821428571	0.891280947	0.962981441	0.037018559	0.780065005	0.810810811	0.795140806
202	1	0	1	1	1	0.803883495	0.196116505	0.974117647	0.821428571	0.891280947	0.962981441	0.037018559	0.780065005	0.810810811	0.795140806
202	1	0	1	1	1	0.803883495	0.196116505	0.974117647	0.821428571	0.891280947	0.962981441	0.037018559	0.780065005	0.810810811	0.795140806
202	1	0	1	1	1	0.803883495	0.196116505	0.974117647	0.821428571	0.891280947	0.962981441	0.037018559	0.780065005	0.810810811	0.795140806
202	1	0	1	1	1	0.803883495	0.196116505	0.974117647	0.821428571	0.891280947	0.962981441	0.037018559	0.780065005	0.810810811	0.795140806
202	1	0	1	1	1	0.803883495	0.196116505	0.974117647	0.821428571	0.891280947	0.962981441	0.037018559	0.780065005	0.810810811	0.795140806
202	1	0	1	1	1	0.803883495	0.196116505	0.974117647	0.821428571	0.891280947	0.962981441	0.037018559	0.780065005	0.810810811	0.795140806
202	1	0	1	1	1	0.803883495	0.196116505	0.974117647	0.821428571	0.891280947	0.962981441	0.037018559	0.780065005	0.810810811	0.795140806
202	1	0	1	1	1	0.803883495	0.196116505	0.974117647	0.821428571	0.891280947	0.962981441	0.037018559	0.780065005	0.810810811	0.795140806
202	1	0	1	1	1	0.803883495	0.196116505	0.974117647	0.821428571	0.891280947	0.962981441	0.037018559	0.780065005	0.810810811	0.795140806
202	1	0	1	1	1	0.803883495	0.196116505	0.974117647	0.821428571	0.891280947	0.962981441	0.037018559	0.780065005	0.810810811	0.795140806
202	1	0	1	1	1	0.803883495	0.196116505	0.974117647	0.821428571	0.891280947	0.962981441	0.037018559	0.780065005	0.810810811	0.795140806
202	1	0	1	1	1	0.803883495	0.196116505	0.974117647	0.821428571	0.891280947	0.962981441	0.037018559	0.780065005	0.810810811	0.795140806
202	1	0	1	1	1	0.803883495	0.196116505	0.974117647	0.821428571	0.891280947	0.962981441	0.037018559	0.780065005	0.810810811	0.795140806
202	1	0	1	1	1	0.803883495	0.196116505	0.974117647	0.821428571	0.891280947	0.962981441	0.037018559	0.780065005	0.810810811	0.795140806
202	1	0	1	1	1	0.803883495	0.196116505	0.974117647	0.821428571	0.891280947	0.962981441	0.037018559	0.780065005	0.810810811	0.795140806
202	1	0	1	1	1	0.803883495	0.196116505	0.974117647	0.821428571	0.891280947	0.962981441	0.037018559	0.780065005	0.810810811	0.795140806
202	1	0	1	1	1	0.803883495	0.196116505	0.974117647	0.821428571	0.891280947	0.962981441	0.037018559	0.780065005	0.810810811	0.795140806
