# Supplementary material for: An Improved Hybrid Feature Selection Algorithm for Electric Charge Recovery Risk
Source: Hindawi journal article supplement (doi:10.1155/2020/8479341), 2020-08-28
Supplement: f1 [file 8479341.f1.zip › 8479341.f1/Experimental Results/201806/NBPSOSEE_results.csv]

features_num	Accuracy_high	Loss_high	Precission_high	Recall_high	F1_high	Accuracy_med	Loss_med	Precission_med	Recall_med	F1_med	Accuracy_low	Loss_low	Precission_low	Recall_low	F1_low
203	1.0	0.0	1.0	1.0	1.0	0.7358490566037735	0.2641509433962265	0.7737226277372263	0.9059829059829059	0.8346456692913387	0.8935023771790809	0.10649762282091912	0.3330781010719755	0.7604895104895105	0.46325878594249204
203	1.0	0.0	1.0	1.0	1.0	0.7358490566037735	0.2641509433962265	0.7737226277372263	0.9059829059829059	0.8346456692913387	0.8935023771790809	0.10649762282091912	0.3330781010719755	0.7604895104895105	0.46325878594249204
203	1.0	0.0	1.0	1.0	1.0	0.7358490566037735	0.2641509433962265	0.7737226277372263	0.9059829059829059	0.8346456692913387	0.8935023771790809	0.10649762282091912	0.3330781010719755	0.7604895104895105	0.46325878594249204
203	1.0	0.0	1.0	1.0	1.0	0.7358490566037735	0.2641509433962265	0.7737226277372263	0.9059829059829059	0.8346456692913387	0.8935023771790809	0.10649762282091912	0.3330781010719755	0.7604895104895105	0.46325878594249204
194	1.0	0.0	1.0	1.0	1.0	0.8335766423357664	0.16642335766423355	0.977391304347826	0.8476621417797888	0.9079159935379644	0.8950742926928557	0.10492570730714433	0.3996328029375765	0.9288762446657184	0.5588361146769362
194	1.0	0.0	1.0	1.0	1.0	0.8335766423357664	0.16642335766423355	0.977391304347826	0.8476621417797888	0.9079159935379644	0.8950742926928557	0.10492570730714433	0.3996328029375765	0.9288762446657184	0.5588361146769362
221	1.0	0.0	1.0	1.0	1.0	0.8059299191374663	0.19407008086253372	0.9262820512820512	0.8550295857988166	0.8892307692307693	0.9226440192366724	0.0773559807633275	0.4758566978193146	0.8804034582132565	0.6177957532861477
221	1.0	0.0	1.0	1.0	1.0	0.8059299191374663	0.19407008086253372	0.9262820512820512	0.8550295857988166	0.8892307692307693	0.9226440192366724	0.0773559807633275	0.4758566978193146	0.8804034582132565	0.6177957532861477
221	1.0	0.0	1.0	1.0	1.0	0.8104838709677419	0.18951612903225806	0.9268680445151032	0.859882005899705	0.8921193573068094	0.9229352164568622	0.07706478354313784	0.4762275915822292	0.8829479768786127	0.6187341772151899
195	1.0	0.0	1.0	1.0	1.0	0.8425076452599388	0.15749235474006118	0.9981651376146791	0.8421052631578947	0.9135180520570948	0.9132064006481668	0.08679359935183306	0.4606299212598425	0.9525101763907734	0.6209641751437418
195	1.0	0.0	1.0	1.0	1.0	0.8137931034482758	0.18620689655172415	1.0	0.8137931034482758	0.8973384030418251	0.9341365461847391	0.06586345381526104	0.5606407322654462	0.9018404907975459	0.6914393226716838
195	1.0	0.0	1.0	1.0	1.0	0.8137931034482758	0.18620689655172415	1.0	0.8137931034482758	0.8973384030418251	0.9341365461847391	0.06586345381526104	0.5606407322654462	0.9018404907975459	0.6914393226716838
205	1.0	0.0	1.0	1.0	1.0	0.7793764988009593	0.22062350119904076	1.0	0.7793764988009593	0.8760107816711591	0.946359774770325	0.053640225229675036	0.7263267429760666	0.7137014314928425	0.7199587416193914
203	1.0	0.0	1.0	1.0	1.0	0.8215223097112858	0.17847769028871396	1.0	0.8215223097112858	0.9020172910662824	0.946451422384093	0.05354857761590704	0.7489406779661016	0.6972386587771203	0.7221654749744637
188	1.0	0.0	1.0	1.0	1.0	0.7580246913580246	0.24197530864197536	1.0	0.7580246913580246	0.8623595505617977	0.9618154908732116	0.03818450912678839	0.7918683446272992	0.8262626262626263	0.8086999505684628
188	1.0	0.0	1.0	1.0	1.0	0.7580246913580246	0.24197530864197536	1.0	0.7580246913580246	0.8623595505617977	0.9618154908732116	0.03818450912678839	0.7918683446272992	0.8262626262626263	0.8086999505684628
203	1.0	0.0	1.0	1.0	1.0	0.7333333333333333	0.2666666666666667	1.0	0.7333333333333333	0.8461538461538459	0.9655239960822722	0.03447600391772776	0.8366383380547686	0.831924882629108	0.8342749529190207
205	1.0	0.0	1.0	1.0	1.0	0.7341389728096677	0.26586102719033233	1.0	0.7341389728096677	0.8466898954703833	0.9656185718483692	0.03438142815163092	0.8341143392689785	0.8364661654135338	0.8352885969028625
200	1.0	0.0	1.0	1.0	1.0	0.7602591792656588	0.2397408207343412	1.0	0.7602591792656588	0.8638036809815951	0.9679468095663392	0.03205319043366084	0.8060301507537688	0.8605150214592274	0.8323819408406851
192	1.0	0.0	1.0	1.0	1.0	0.7626582278481012	0.2373417721518988	1.0	0.7626582278481012	0.8653500897666068	0.9680164319248826	0.031983568075117375	0.8636363636363636	0.8276181649675626	0.8452437292948415
192	1.0	0.0	1.0	1.0	1.0	0.7626582278481012	0.2373417721518988	1.0	0.7626582278481012	0.8653500897666068	0.9680164319248826	0.031983568075117375	0.8636363636363636	0.8276181649675626	0.8452437292948415
190	1.0	0.0	1.0	1.0	1.0	0.7155425219941349	0.2844574780058651	1.0	0.7155425219941349	0.8341880341880342	0.9771546230022552	0.022845376997744915	0.9428263214670982	0.8292220113851992	0.8823826350328118
190	1.0	0.0	1.0	1.0	1.0	0.7155425219941349	0.2844574780058651	1.0	0.7155425219941349	0.8341880341880342	0.9771546230022552	0.022845376997744915	0.9428263214670982	0.8292220113851992	0.8823826350328118
190	1.0	0.0	1.0	1.0	1.0	0.7155425219941349	0.2844574780058651	1.0	0.7155425219941349	0.8341880341880342	0.9771546230022552	0.022845376997744915	0.9428263214670982	0.8292220113851992	0.8823826350328118
190	1.0	0.0	1.0	1.0	1.0	0.7155425219941349	0.2844574780058651	1.0	0.7155425219941349	0.8341880341880342	0.9771546230022552	0.022845376997744915	0.9428263214670982	0.8292220113851992	0.8823826350328118
190	1.0	0.0	1.0	1.0	1.0	0.7155425219941349	0.2844574780058651	1.0	0.7155425219941349	0.8341880341880342	0.9771546230022552	0.022845376997744915	0.9428263214670982	0.8292220113851992	0.8823826350328118
190	1.0	0.0	1.0	1.0	1.0	0.7155425219941349	0.2844574780058651	1.0	0.7155425219941349	0.8341880341880342	0.9771546230022552	0.022845376997744915	0.9428263214670982	0.8292220113851992	0.8823826350328118
185	1.0	0.0	1.0	1.0	1.0	0.6675392670157068	0.33246073298429324	1.0	0.6675392670157068	0.8006279434850863	0.9845442016144912	0.015455798385508925	0.9562899786780384	0.8854886475814413	0.919528446950282
193	1.0	0.0	1.0	1.0	1.0	0.7181372549019608	0.2818627450980392	1.0	0.7181372549019608	0.8359486447931526	0.9804579549940782	0.019542045005921826	0.9037871033776868	0.894630192502533	0.8991853360488798
193	1.0	0.0	1.0	1.0	1.0	0.7181372549019608	0.2818627450980392	1.0	0.7181372549019608	0.8359486447931526	0.9804579549940782	0.019542045005921826	0.9037871033776868	0.894630192502533	0.8991853360488798
193	1.0	0.0	1.0	1.0	1.0	0.7181372549019608	0.2818627450980392	1.0	0.7181372549019608	0.8359486447931526	0.9804579549940782	0.019542045005921826	0.9037871033776868	0.894630192502533	0.8991853360488798
198	1.0	0.0	1.0	1.0	1.0	0.7272727272727273	0.2727272727272727	1.0	0.7272727272727273	0.8421052631578948	0.9811711356466876	0.018828864353312325	0.9122448979591836	0.8948948948948949	0.9034866093986862
198	1.0	0.0	1.0	1.0	1.0	0.7272727272727273	0.2727272727272727	1.0	0.7272727272727273	0.8421052631578948	0.9811711356466876	0.018828864353312325	0.9122448979591836	0.8948948948948949	0.9034866093986862
198	1.0	0.0	1.0	1.0	1.0	0.7272727272727273	0.2727272727272727	1.0	0.7272727272727273	0.8421052631578948	0.9811711356466876	0.018828864353312325	0.9122448979591836	0.8948948948948949	0.9034866093986862
198	1.0	0.0	1.0	1.0	1.0	0.7272727272727273	0.2727272727272727	1.0	0.7272727272727273	0.8421052631578948	0.9811711356466876	0.018828864353312325	0.9122448979591836	0.8948948948948949	0.9034866093986862
198	1.0	0.0	1.0	1.0	1.0	0.7311557788944724	0.26884422110552764	1.0	0.7311557788944724	0.8447024673439768	0.9811674225990928	0.018832577400907158	0.910386965376782	0.8966900702106319	0.9034866093986862
201	1.0	0.0	1.0	1.0	1.0	0.7309644670050761	0.2690355329949239	1.0	0.7309644670050761	0.8445747800586508	0.9812734082397004	0.018726591760299668	0.915897435897436	0.8921078921078921	0.9038461538461541
197	1.0	0.0	1.0	1.0	1.0	0.7321428571428571	0.2678571428571429	1.0	0.7321428571428571	0.8453608247422679	0.9814741821048484	0.01852581789515173	0.9196704428424304	0.8903290129611167	0.9047619047619048
197	1.0	0.0	1.0	1.0	1.0	0.7348484848484849	0.26515151515151514	1.0	0.7348484848484849	0.8471615720524017	0.9811711356466876	0.018828864353312325	0.9105691056910568	0.8968968968968969	0.9036812909732728
197	1.0	0.0	1.0	1.0	1.0	0.7348484848484849	0.26515151515151514	1.0	0.7348484848484849	0.8471615720524017	0.9811711356466876	0.018828864353312325	0.9105691056910568	0.8968968968968969	0.9036812909732728
197	1.0	0.0	1.0	1.0	1.0	0.7348484848484849	0.26515151515151514	1.0	0.7348484848484849	0.8471615720524017	0.9811711356466876	0.018828864353312325	0.9105691056910568	0.8968968968968969	0.9036812909732728
197	1.0	0.0	1.0	1.0	1.0	0.7348484848484849	0.26515151515151514	1.0	0.7348484848484849	0.8471615720524017	0.9811711356466876	0.018828864353312325	0.9105691056910568	0.8968968968968969	0.9036812909732728
197	1.0	0.0	1.0	1.0	1.0	0.7348484848484849	0.26515151515151514	1.0	0.7348484848484849	0.8471615720524017	0.9811711356466876	0.018828864353312325	0.9105691056910568	0.8968968968968969	0.9036812909732728
197	1.0	0.0	1.0	1.0	1.0	0.7348484848484849	0.26515151515151514	1.0	0.7348484848484849	0.8471615720524017	0.9811711356466876	0.018828864353312325	0.9105691056910568	0.8968968968968969	0.9036812909732728
197	1.0	0.0	1.0	1.0	1.0	0.7348484848484849	0.26515151515151514	1.0	0.7348484848484849	0.8471615720524017	0.9811711356466876	0.018828864353312325	0.9105691056910568	0.8968968968968969	0.9036812909732728
197	1.0	0.0	1.0	1.0	1.0	0.7348484848484849	0.26515151515151514	1.0	0.7348484848484849	0.8471615720524017	0.9811711356466876	0.018828864353312325	0.9105691056910568	0.8968968968968969	0.9036812909732728
197	1.0	0.0	1.0	1.0	1.0	0.7348484848484849	0.26515151515151514	1.0	0.7348484848484849	0.8471615720524017	0.9811711356466876	0.018828864353312325	0.9105691056910568	0.8968968968968969	0.9036812909732728
197	1.0	0.0	1.0	1.0	1.0	0.7348484848484849	0.26515151515151514	1.0	0.7348484848484849	0.8471615720524017	0.9811711356466876	0.018828864353312325	0.9105691056910568	0.8968968968968969	0.9036812909732728
197	1.0	0.0	1.0	1.0	1.0	0.7348484848484849	0.26515151515151514	1.0	0.7348484848484849	0.8471615720524017	0.9811711356466876	0.018828864353312325	0.9105691056910568	0.8968968968968969	0.9036812909732728
192	1.0	0.0	1.0	1.0	1.0	0.7333333333333333	0.2666666666666667	1.0	0.7333333333333333	0.8461538461538459	0.9814778325123152	0.01852216748768476	0.9207003089598352	0.8895522388059701	0.9048582995951416
192	1.0	0.0	1.0	1.0	1.0	0.7333333333333333	0.2666666666666667	1.0	0.7333333333333333	0.8461538461538459	0.9814778325123152	0.01852216748768476	0.9207003089598352	0.8895522388059701	0.9048582995951416
204	1.0	0.0	1.0	1.0	1.0	0.7361809045226131	0.2638190954773869	1.0	0.7361809045226131	0.8480463096960926	0.9812660224807729	0.01873397751922701	0.9104781281790436	0.8976930792377131	0.9040404040404041
204	1.0	0.0	1.0	1.0	1.0	0.7361809045226131	0.2638190954773869	1.0	0.7361809045226131	0.8480463096960926	0.9812660224807729	0.01873397751922701	0.9104781281790436	0.8976930792377131	0.9040404040404041
204	1.0	0.0	1.0	1.0	1.0	0.7361809045226131	0.2638190954773869	1.0	0.7361809045226131	0.8480463096960926	0.9812660224807729	0.01873397751922701	0.9104781281790436	0.8976930792377131	0.9040404040404041
204	1.0	0.0	1.0	1.0	1.0	0.7361809045226131	0.2638190954773869	1.0	0.7361809045226131	0.8480463096960926	0.9812660224807729	0.01873397751922701	0.9104781281790436	0.8976930792377131	0.9040404040404041
204	1.0	0.0	1.0	1.0	1.0	0.7361809045226131	0.2638190954773869	1.0	0.7361809045226131	0.8480463096960926	0.9812660224807729	0.01873397751922701	0.9104781281790436	0.8976930792377131	0.9040404040404041
204	1.0	0.0	1.0	1.0	1.0	0.7361809045226131	0.2638190954773869	1.0	0.7361809045226131	0.8480463096960926	0.9812660224807729	0.01873397751922701	0.9104781281790436	0.8976930792377131	0.9040404040404041
204	1.0	0.0	1.0	1.0	1.0	0.7361809045226131	0.2638190954773869	1.0	0.7361809045226131	0.8480463096960926	0.9812660224807729	0.01873397751922701	0.9104781281790436	0.8976930792377131	0.9040404040404041
204	1.0	0.0	1.0	1.0	1.0	0.7361809045226131	0.2638190954773869	1.0	0.7361809045226131	0.8480463096960926	0.9812660224807729	0.01873397751922701	0.9104781281790436	0.8976930792377131	0.9040404040404041
204	1.0	0.0	1.0	1.0	1.0	0.7361809045226131	0.2638190954773869	1.0	0.7361809045226131	0.8480463096960926	0.9812660224807729	0.01873397751922701	0.9104781281790436	0.8976930792377131	0.9040404040404041
204	1.0	0.0	1.0	1.0	1.0	0.7361809045226131	0.2638190954773869	1.0	0.7361809045226131	0.8480463096960926	0.9812660224807729	0.01873397751922701	0.9104781281790436	0.8976930792377131	0.9040404040404041
204	1.0	0.0	1.0	1.0	1.0	0.7361809045226131	0.2638190954773869	1.0	0.7361809045226131	0.8480463096960926	0.9812660224807729	0.01873397751922701	0.9104781281790436	0.8976930792377131	0.9040404040404041
204	1.0	0.0	1.0	1.0	1.0	0.7361809045226131	0.2638190954773869	1.0	0.7361809045226131	0.8480463096960926	0.9812660224807729	0.01873397751922701	0.9104781281790436	0.8976930792377131	0.9040404040404041
204	1.0	0.0	1.0	1.0	1.0	0.7361809045226131	0.2638190954773869	1.0	0.7361809045226131	0.8480463096960926	0.9812660224807729	0.01873397751922701	0.9104781281790436	0.8976930792377131	0.9040404040404041
204	1.0	0.0	1.0	1.0	1.0	0.7361809045226131	0.2638190954773869	1.0	0.7361809045226131	0.8480463096960926	0.9812660224807729	0.01873397751922701	0.9104781281790436	0.8976930792377131	0.9040404040404041
204	1.0	0.0	1.0	1.0	1.0	0.7361809045226131	0.2638190954773869	1.0	0.7361809045226131	0.8480463096960926	0.9812660224807729	0.01873397751922701	0.9104781281790436	0.8976930792377131	0.9040404040404041
204	1.0	0.0	1.0	1.0	1.0	0.7361809045226131	0.2638190954773869	1.0	0.7361809045226131	0.8480463096960926	0.9812660224807729	0.01873397751922701	0.9104781281790436	0.8976930792377131	0.9040404040404041
204	1.0	0.0	1.0	1.0	1.0	0.7361809045226131	0.2638190954773869	1.0	0.7361809045226131	0.8480463096960926	0.9812660224807729	0.01873397751922701	0.9104781281790436	0.8976930792377131	0.9040404040404041
204	1.0	0.0	1.0	1.0	1.0	0.7361809045226131	0.2638190954773869	1.0	0.7361809045226131	0.8480463096960926	0.9812660224807729	0.01873397751922701	0.9104781281790436	0.8976930792377131	0.9040404040404041
204	1.0	0.0	1.0	1.0	1.0	0.7361809045226131	0.2638190954773869	1.0	0.7361809045226131	0.8480463096960926	0.9812660224807729	0.01873397751922701	0.9104781281790436	0.8976930792377131	0.9040404040404041
204	1.0	0.0	1.0	1.0	1.0	0.7361809045226131	0.2638190954773869	1.0	0.7361809045226131	0.8480463096960926	0.9812660224807729	0.01873397751922701	0.9104781281790436	0.8976930792377131	0.9040404040404041
204	1.0	0.0	1.0	1.0	1.0	0.7361809045226131	0.2638190954773869	1.0	0.7361809045226131	0.8480463096960926	0.9812660224807729	0.01873397751922701	0.9104781281790436	0.8976930792377131	0.9040404040404041
204	1.0	0.0	1.0	1.0	1.0	0.7361809045226131	0.2638190954773869	1.0	0.7361809045226131	0.8480463096960926	0.9812660224807729	0.01873397751922701	0.9104781281790436	0.8976930792377131	0.9040404040404041
204	1.0	0.0	1.0	1.0	1.0	0.7361809045226131	0.2638190954773869	1.0	0.7361809045226131	0.8480463096960926	0.9812660224807729	0.01873397751922701	0.9104781281790436	0.8976930792377131	0.9040404040404041
204	1.0	0.0	1.0	1.0	1.0	0.7361809045226131	0.2638190954773869	1.0	0.7361809045226131	0.8480463096960926	0.9812660224807729	0.01873397751922701	0.9104781281790436	0.8976930792377131	0.9040404040404041
204	1.0	0.0	1.0	1.0	1.0	0.7361809045226131	0.2638190954773869	1.0	0.7361809045226131	0.8480463096960926	0.9812660224807729	0.01873397751922701	0.9104781281790436	0.8976930792377131	0.9040404040404041
204	1.0	0.0	1.0	1.0	1.0	0.7361809045226131	0.2638190954773869	1.0	0.7361809045226131	0.8480463096960926	0.9812660224807729	0.01873397751922701	0.9104781281790436	0.8976930792377131	0.9040404040404041
204	1.0	0.0	1.0	1.0	1.0	0.7361809045226131	0.2638190954773869	1.0	0.7361809045226131	0.8480463096960926	0.9812660224807729	0.01873397751922701	0.9104781281790436	0.8976930792377131	0.9040404040404041
204	1.0	0.0	1.0	1.0	1.0	0.7361809045226131	0.2638190954773869	1.0	0.7361809045226131	0.8480463096960926	0.9812660224807729	0.01873397751922701	0.9104781281790436	0.8976930792377131	0.9040404040404041
204	1.0	0.0	1.0	1.0	1.0	0.7361809045226131	0.2638190954773869	1.0	0.7361809045226131	0.8480463096960926	0.9812660224807729	0.01873397751922701	0.9104781281790436	0.8976930792377131	0.9040404040404041
204	1.0	0.0	1.0	1.0	1.0	0.7361809045226131	0.2638190954773869	1.0	0.7361809045226131	0.8480463096960926	0.9812660224807729	0.01873397751922701	0.9104781281790436	0.8976930792377131	0.9040404040404041
201	1.0	0.0	1.0	1.0	1.0	0.7343358395989975	0.2656641604010025	1.0	0.7343358395989975	0.8468208092485549	0.981560003944384	0.01843999605561586	0.9123343527013252	0.8985943775100401	0.9054122407688416
201	1.0	0.0	1.0	1.0	1.0	0.7343358395989975	0.2656641604010025	1.0	0.7343358395989975	0.8468208092485549	0.981560003944384	0.01843999605561586	0.9123343527013252	0.8985943775100401	0.9054122407688416
201	1.0	0.0	1.0	1.0	1.0	0.7343358395989975	0.2656641604010025	1.0	0.7343358395989975	0.8468208092485549	0.981560003944384	0.01843999605561586	0.9123343527013252	0.8985943775100401	0.9054122407688416
201	1.0	0.0	1.0	1.0	1.0	0.7343358395989975	0.2656641604010025	1.0	0.7343358395989975	0.8468208092485549	0.981560003944384	0.01843999605561586	0.9123343527013252	0.8985943775100401	0.9054122407688416
201	1.0	0.0	1.0	1.0	1.0	0.7343358395989975	0.2656641604010025	1.0	0.7343358395989975	0.8468208092485549	0.981560003944384	0.01843999605561586	0.9123343527013252	0.8985943775100401	0.9054122407688416
201	1.0	0.0	1.0	1.0	1.0	0.7343358395989975	0.2656641604010025	1.0	0.7343358395989975	0.8468208092485549	0.981560003944384	0.01843999605561586	0.9123343527013252	0.8985943775100401	0.9054122407688416
201	1.0	0.0	1.0	1.0	1.0	0.7343358395989975	0.2656641604010025	1.0	0.7343358395989975	0.8468208092485549	0.981560003944384	0.01843999605561586	0.9123343527013252	0.8985943775100401	0.9054122407688416
201	1.0	0.0	1.0	1.0	1.0	0.7343358395989975	0.2656641604010025	1.0	0.7343358395989975	0.8468208092485549	0.981560003944384	0.01843999605561586	0.9123343527013252	0.8985943775100401	0.9054122407688416
201	1.0	0.0	1.0	1.0	1.0	0.7343358395989975	0.2656641604010025	1.0	0.7343358395989975	0.8468208092485549	0.981560003944384	0.01843999605561586	0.9123343527013252	0.8985943775100401	0.9054122407688416
201	1.0	0.0	1.0	1.0	1.0	0.7343358395989975	0.2656641604010025	1.0	0.7343358395989975	0.8468208092485549	0.981560003944384	0.01843999605561586	0.9123343527013252	0.8985943775100401	0.9054122407688416
201	1.0	0.0	1.0	1.0	1.0	0.7343358395989975	0.2656641604010025	1.0	0.7343358395989975	0.8468208092485549	0.981560003944384	0.01843999605561586	0.9123343527013252	0.8985943775100401	0.9054122407688416
201	1.0	0.0	1.0	1.0	1.0	0.7343358395989975	0.2656641604010025	1.0	0.7343358395989975	0.8468208092485549	0.981560003944384	0.01843999605561586	0.9123343527013252	0.8985943775100401	0.9054122407688416
201	1.0	0.0	1.0	1.0	1.0	0.7343358395989975	0.2656641604010025	1.0	0.7343358395989975	0.8468208092485549	0.981560003944384	0.01843999605561586	0.9123343527013252	0.8985943775100401	0.9054122407688416
198	1.0	0.0	1.0	1.0	1.0	0.7361809045226131	0.2638190954773869	1.0	0.7361809045226131	0.8480463096960926	0.9813646223624533	0.018635377637546857	0.9105691056910568	0.8986960882647944	0.9045936395759716
198	1.0	0.0	1.0	1.0	1.0	0.7361809045226131	0.2638190954773869	1.0	0.7361809045226131	0.8480463096960926	0.9813646223624533	0.018635377637546857	0.9105691056910568	0.8986960882647944	0.9045936395759716
196	1.0	0.0	1.0	1.0	1.0	0.7529691211401425	0.24703087885985756	1.0	0.7529691211401425	0.8590785907859078	0.9812234410514872	0.018776558948512708	0.9	0.9055441478439424	0.9027635619242579
196	1.0	0.0	1.0	1.0	1.0	0.7671840354767184	0.2328159645232816	1.0	0.7671840354767184	0.8682559598494355	0.9808702547328774	0.019129745267122637	0.8851282051282051	0.9141949152542372	0.8994267847837415
196	1.0	0.0	1.0	1.0	1.0	0.7671840354767184	0.2328159645232816	1.0	0.7671840354767184	0.8682559598494355	0.9808702547328774	0.019129745267122637	0.8851282051282051	0.9141949152542372	0.8994267847837415
205	1.0	0.0	1.0	1.0	1.0	0.7706013363028953	0.2293986636971047	1.0	0.7706013363028953	0.8704402515723271	0.9807749479734416	0.01922505202655833	0.8860369609856262	0.9122621564482031	0.8989583333333333
