# Supplementary material for: An Improved Hybrid Feature Selection Algorithm for Electric Charge Recovery Risk
Source: Hindawi journal article supplement (doi:10.1155/2020/8479341), 2020-08-28
Supplement: f1 [file 8479341.f1.zip › 8479341.f1/Experimental Results/201806/NBPSOSEE_SBS_results.csv]

features_num	Accuracy_high	Loss_high	Precission_high	Recall_high	F1_high	Accuracy_med	Loss_med	Precission_med	Recall_med	F1_med	Accuracy_low	Loss_low	Precission_low	Recall_low	F1_low
205	1	0	1	1	1	0.759174312	0.240825688	1	0.759174312	0.863102999	0.98169042	0.01830958	0.898148148	0.910323253	0.904194718
204	1	0	1	1	1	0.765909091	0.234090909	1	0.765909091	0.867438867	0.981782178	0.018217822	0.897013388	0.912041885	0.904465213
204	1	0	1	1	1	0.765909091	0.234090909	1	0.765909091	0.867438867	0.981782178	0.018217822	0.897013388	0.912041885	0.904465213
204	1	0	1	1	1	0.765909091	0.234090909	1	0.765909091	0.867438867	0.981782178	0.018217822	0.897013388	0.912041885	0.904465213
204	1	0	1	1	1	0.765909091	0.234090909	1	0.765909091	0.867438867	0.981782178	0.018217822	0.897013388	0.912041885	0.904465213
204	1	0	1	1	1	0.765909091	0.234090909	1	0.765909091	0.867438867	0.981782178	0.018217822	0.897013388	0.912041885	0.904465213
204	1	0	1	1	1	0.765909091	0.234090909	1	0.765909091	0.867438867	0.981782178	0.018217822	0.897013388	0.912041885	0.904465213
204	1	0	1	1	1	0.765909091	0.234090909	1	0.765909091	0.867438867	0.981782178	0.018217822	0.897013388	0.912041885	0.904465213
204	1	0	1	1	1	0.765909091	0.234090909	1	0.765909091	0.867438867	0.981782178	0.018217822	0.897013388	0.912041885	0.904465213
204	1	0	1	1	1	0.765909091	0.234090909	1	0.765909091	0.867438867	0.981782178	0.018217822	0.897013388	0.912041885	0.904465213
204	1	0	1	1	1	0.765909091	0.234090909	1	0.765909091	0.867438867	0.981782178	0.018217822	0.897013388	0.912041885	0.904465213
204	1	0	1	1	1	0.765909091	0.234090909	1	0.765909091	0.867438867	0.981782178	0.018217822	0.897013388	0.912041885	0.904465213
204	1	0	1	1	1	0.765909091	0.234090909	1	0.765909091	0.867438867	0.981782178	0.018217822	0.897013388	0.912041885	0.904465213
204	1	0	1	1	1	0.765909091	0.234090909	1	0.765909091	0.867438867	0.981782178	0.018217822	0.897013388	0.912041885	0.904465213
204	1	0	1	1	1	0.765909091	0.234090909	1	0.765909091	0.867438867	0.981782178	0.018217822	0.897013388	0.912041885	0.904465213
204	1	0	1	1	1	0.765909091	0.234090909	1	0.765909091	0.867438867	0.981782178	0.018217822	0.897013388	0.912041885	0.904465213
204	1	0	1	1	1	0.765909091	0.234090909	1	0.765909091	0.867438867	0.981782178	0.018217822	0.897013388	0.912041885	0.904465213
204	1	0	1	1	1	0.765909091	0.234090909	1	0.765909091	0.867438867	0.981782178	0.018217822	0.897013388	0.912041885	0.904465213
204	1	0	1	1	1	0.765909091	0.234090909	1	0.765909091	0.867438867	0.981782178	0.018217822	0.897013388	0.912041885	0.904465213
204	1	0	1	1	1	0.765909091	0.234090909	1	0.765909091	0.867438867	0.981782178	0.018217822	0.897013388	0.912041885	0.904465213
204	1	0	1	1	1	0.765909091	0.234090909	1	0.765909091	0.867438867	0.981782178	0.018217822	0.897013388	0.912041885	0.904465213
204	1	0	1	1	1	0.765909091	0.234090909	1	0.765909091	0.867438867	0.981782178	0.018217822	0.897013388	0.912041885	0.904465213
204	1	0	1	1	1	0.765909091	0.234090909	1	0.765909091	0.867438867	0.981782178	0.018217822	0.897013388	0.912041885	0.904465213
204	1	0	1	1	1	0.765909091	0.234090909	1	0.765909091	0.867438867	0.981782178	0.018217822	0.897013388	0.912041885	0.904465213
204	1	0	1	1	1	0.765909091	0.234090909	1	0.765909091	0.867438867	0.981782178	0.018217822	0.897013388	0.912041885	0.904465213
204	1	0	1	1	1	0.765909091	0.234090909	1	0.765909091	0.867438867	0.981782178	0.018217822	0.897013388	0.912041885	0.904465213
204	1	0	1	1	1	0.765909091	0.234090909	1	0.765909091	0.867438867	0.981782178	0.018217822	0.897013388	0.912041885	0.904465213
204	1	0	1	1	1	0.765909091	0.234090909	1	0.765909091	0.867438867	0.981782178	0.018217822	0.897013388	0.912041885	0.904465213
204	1	0	1	1	1	0.765909091	0.234090909	1	0.765909091	0.867438867	0.981782178	0.018217822	0.897013388	0.912041885	0.904465213
204	1	0	1	1	1	0.765909091	0.234090909	1	0.765909091	0.867438867	0.981782178	0.018217822	0.897013388	0.912041885	0.904465213
204	1	0	1	1	1	0.765909091	0.234090909	1	0.765909091	0.867438867	0.981782178	0.018217822	0.897013388	0.912041885	0.904465213
204	1	0	1	1	1	0.765909091	0.234090909	1	0.765909091	0.867438867	0.981782178	0.018217822	0.897013388	0.912041885	0.904465213
204	1	0	1	1	1	0.765909091	0.234090909	1	0.765909091	0.867438867	0.981782178	0.018217822	0.897013388	0.912041885	0.904465213
204	1	0	1	1	1	0.765909091	0.234090909	1	0.765909091	0.867438867	0.981782178	0.018217822	0.897013388	0.912041885	0.904465213
204	1	0	1	1	1	0.765909091	0.234090909	1	0.765909091	0.867438867	0.981782178	0.018217822	0.897013388	0.912041885	0.904465213
204	1	0	1	1	1	0.765909091	0.234090909	1	0.765909091	0.867438867	0.981782178	0.018217822	0.897013388	0.912041885	0.904465213
204	1	0	1	1	1	0.765909091	0.234090909	1	0.765909091	0.867438867	0.981782178	0.018217822	0.897013388	0.912041885	0.904465213
204	1	0	1	1	1	0.765909091	0.234090909	1	0.765909091	0.867438867	0.981782178	0.018217822	0.897013388	0.912041885	0.904465213
204	1	0	1	1	1	0.765909091	0.234090909	1	0.765909091	0.867438867	0.981782178	0.018217822	0.897013388	0.912041885	0.904465213
204	1	0	1	1	1	0.765909091	0.234090909	1	0.765909091	0.867438867	0.981782178	0.018217822	0.897013388	0.912041885	0.904465213
204	1	0	1	1	1	0.765909091	0.234090909	1	0.765909091	0.867438867	0.981782178	0.018217822	0.897013388	0.912041885	0.904465213
204	1	0	1	1	1	0.765909091	0.234090909	1	0.765909091	0.867438867	0.981782178	0.018217822	0.897013388	0.912041885	0.904465213
204	1	0	1	1	1	0.765909091	0.234090909	1	0.765909091	0.867438867	0.981782178	0.018217822	0.897013388	0.912041885	0.904465213
204	1	0	1	1	1	0.765909091	0.234090909	1	0.765909091	0.867438867	0.981782178	0.018217822	0.897013388	0.912041885	0.904465213
204	1	0	1	1	1	0.765909091	0.234090909	1	0.765909091	0.867438867	0.981782178	0.018217822	0.897013388	0.912041885	0.904465213
204	1	0	1	1	1	0.765909091	0.234090909	1	0.765909091	0.867438867	0.981782178	0.018217822	0.897013388	0.912041885	0.904465213
204	1	0	1	1	1	0.765909091	0.234090909	1	0.765909091	0.867438867	0.981782178	0.018217822	0.897013388	0.912041885	0.904465213
204	1	0	1	1	1	0.765909091	0.234090909	1	0.765909091	0.867438867	0.981782178	0.018217822	0.897013388	0.912041885	0.904465213
204	1	0	1	1	1	0.765909091	0.234090909	1	0.765909091	0.867438867	0.981782178	0.018217822	0.897013388	0.912041885	0.904465213
204	1	0	1	1	1	0.765909091	0.234090909	1	0.765909091	0.867438867	0.981782178	0.018217822	0.897013388	0.912041885	0.904465213
204	1	0	1	1	1	0.765909091	0.234090909	1	0.765909091	0.867438867	0.981782178	0.018217822	0.897013388	0.912041885	0.904465213
204	1	0	1	1	1	0.765909091	0.234090909	1	0.765909091	0.867438867	0.981782178	0.018217822	0.897013388	0.912041885	0.904465213
204	1	0	1	1	1	0.765909091	0.234090909	1	0.765909091	0.867438867	0.981782178	0.018217822	0.897013388	0.912041885	0.904465213
204	1	0	1	1	1	0.765909091	0.234090909	1	0.765909091	0.867438867	0.981782178	0.018217822	0.897013388	0.912041885	0.904465213
204	1	0	1	1	1	0.765909091	0.234090909	1	0.765909091	0.867438867	0.981782178	0.018217822	0.897013388	0.912041885	0.904465213
204	1	0	1	1	1	0.765909091	0.234090909	1	0.765909091	0.867438867	0.981782178	0.018217822	0.897013388	0.912041885	0.904465213
204	1	0	1	1	1	0.765909091	0.234090909	1	0.765909091	0.867438867	0.981782178	0.018217822	0.897013388	0.912041885	0.904465213
204	1	0	1	1	1	0.765909091	0.234090909	1	0.765909091	0.867438867	0.981782178	0.018217822	0.897013388	0.912041885	0.904465213
204	1	0	1	1	1	0.765909091	0.234090909	1	0.765909091	0.867438867	0.981782178	0.018217822	0.897013388	0.912041885	0.904465213
204	1	0	1	1	1	0.765909091	0.234090909	1	0.765909091	0.867438867	0.981782178	0.018217822	0.897013388	0.912041885	0.904465213
204	1	0	1	1	1	0.765909091	0.234090909	1	0.765909091	0.867438867	0.981782178	0.018217822	0.897013388	0.912041885	0.904465213
204	1	0	1	1	1	0.765909091	0.234090909	1	0.765909091	0.867438867	0.981782178	0.018217822	0.897013388	0.912041885	0.904465213
204	1	0	1	1	1	0.765909091	0.234090909	1	0.765909091	0.867438867	0.981782178	0.018217822	0.897013388	0.912041885	0.904465213
204	1	0	1	1	1	0.765909091	0.234090909	1	0.765909091	0.867438867	0.981782178	0.018217822	0.897013388	0.912041885	0.904465213
204	1	0	1	1	1	0.765909091	0.234090909	1	0.765909091	0.867438867	0.981782178	0.018217822	0.897013388	0.912041885	0.904465213
204	1	0	1	1	1	0.765909091	0.234090909	1	0.765909091	0.867438867	0.981782178	0.018217822	0.897013388	0.912041885	0.904465213
204	1	0	1	1	1	0.765909091	0.234090909	1	0.765909091	0.867438867	0.981782178	0.018217822	0.897013388	0.912041885	0.904465213
204	1	0	1	1	1	0.765909091	0.234090909	1	0.765909091	0.867438867	0.981782178	0.018217822	0.897013388	0.912041885	0.904465213
204	1	0	1	1	1	0.765909091	0.234090909	1	0.765909091	0.867438867	0.981782178	0.018217822	0.897013388	0.912041885	0.904465213
204	1	0	1	1	1	0.765909091	0.234090909	1	0.765909091	0.867438867	0.981782178	0.018217822	0.897013388	0.912041885	0.904465213
204	1	0	1	1	1	0.765909091	0.234090909	1	0.765909091	0.867438867	0.981782178	0.018217822	0.897013388	0.912041885	0.904465213
204	1	0	1	1	1	0.765909091	0.234090909	1	0.765909091	0.867438867	0.981782178	0.018217822	0.897013388	0.912041885	0.904465213
204	1	0	1	1	1	0.765909091	0.234090909	1	0.765909091	0.867438867	0.981782178	0.018217822	0.897013388	0.912041885	0.904465213
204	1	0	1	1	1	0.765909091	0.234090909	1	0.765909091	0.867438867	0.981782178	0.018217822	0.897013388	0.912041885	0.904465213
204	1	0	1	1	1	0.765909091	0.234090909	1	0.765909091	0.867438867	0.981782178	0.018217822	0.897013388	0.912041885	0.904465213
204	1	0	1	1	1	0.765909091	0.234090909	1	0.765909091	0.867438867	0.981782178	0.018217822	0.897013388	0.912041885	0.904465213
204	1	0	1	1	1	0.765909091	0.234090909	1	0.765909091	0.867438867	0.981782178	0.018217822	0.897013388	0.912041885	0.904465213
204	1	0	1	1	1	0.765909091	0.234090909	1	0.765909091	0.867438867	0.981782178	0.018217822	0.897013388	0.912041885	0.904465213
204	1	0	1	1	1	0.765909091	0.234090909	1	0.765909091	0.867438867	0.981782178	0.018217822	0.897013388	0.912041885	0.904465213
204	1	0	1	1	1	0.765909091	0.234090909	1	0.765909091	0.867438867	0.981782178	0.018217822	0.897013388	0.912041885	0.904465213
204	1	0	1	1	1	0.765909091	0.234090909	1	0.765909091	0.867438867	0.981782178	0.018217822	0.897013388	0.912041885	0.904465213
204	1	0	1	1	1	0.765909091	0.234090909	1	0.765909091	0.867438867	0.981782178	0.018217822	0.897013388	0.912041885	0.904465213
204	1	0	1	1	1	0.765909091	0.234090909	1	0.765909091	0.867438867	0.981782178	0.018217822	0.897013388	0.912041885	0.904465213
204	1	0	1	1	1	0.765909091	0.234090909	1	0.765909091	0.867438867	0.981782178	0.018217822	0.897013388	0.912041885	0.904465213
204	1	0	1	1	1	0.765909091	0.234090909	1	0.765909091	0.867438867	0.981782178	0.018217822	0.897013388	0.912041885	0.904465213
204	1	0	1	1	1	0.765909091	0.234090909	1	0.765909091	0.867438867	0.981782178	0.018217822	0.897013388	0.912041885	0.904465213
204	1	0	1	1	1	0.765909091	0.234090909	1	0.765909091	0.867438867	0.981782178	0.018217822	0.897013388	0.912041885	0.904465213
204	1	0	1	1	1	0.765909091	0.234090909	1	0.765909091	0.867438867	0.981782178	0.018217822	0.897013388	0.912041885	0.904465213
204	1	0	1	1	1	0.765909091	0.234090909	1	0.765909091	0.867438867	0.981782178	0.018217822	0.897013388	0.912041885	0.904465213
204	1	0	1	1	1	0.765909091	0.234090909	1	0.765909091	0.867438867	0.981782178	0.018217822	0.897013388	0.912041885	0.904465213
204	1	0	1	1	1	0.765909091	0.234090909	1	0.765909091	0.867438867	0.981782178	0.018217822	0.897013388	0.912041885	0.904465213
204	1	0	1	1	1	0.765909091	0.234090909	1	0.765909091	0.867438867	0.981782178	0.018217822	0.897013388	0.912041885	0.904465213
204	1	0	1	1	1	0.765909091	0.234090909	1	0.765909091	0.867438867	0.981782178	0.018217822	0.897013388	0.912041885	0.904465213
204	1	0	1	1	1	0.765909091	0.234090909	1	0.765909091	0.867438867	0.981782178	0.018217822	0.897013388	0.912041885	0.904465213
204	1	0	1	1	1	0.765909091	0.234090909	1	0.765909091	0.867438867	0.981782178	0.018217822	0.897013388	0.912041885	0.904465213
204	1	0	1	1	1	0.765909091	0.234090909	1	0.765909091	0.867438867	0.981782178	0.018217822	0.897013388	0.912041885	0.904465213
204	1	0	1	1	1	0.765909091	0.234090909	1	0.765909091	0.867438867	0.981782178	0.018217822	0.897013388	0.912041885	0.904465213
204	1	0	1	1	1	0.765909091	0.234090909	1	0.765909091	0.867438867	0.981782178	0.018217822	0.897013388	0.912041885	0.904465213
204	1	0	1	1	1	0.765909091	0.234090909	1	0.765909091	0.867438867	0.981782178	0.018217822	0.897013388	0.912041885	0.904465213
204	1	0	1	1	1	0.765909091	0.234090909	1	0.765909091	0.867438867	0.981782178	0.018217822	0.897013388	0.912041885	0.904465213
204	1	0	1	1	1	0.765909091	0.234090909	1	0.765909091	0.867438867	0.981782178	0.018217822	0.897013388	0.912041885	0.904465213
204	1	0	1	1	1	0.765909091	0.234090909	1	0.765909091	0.867438867	0.981782178	0.018217822	0.897013388	0.912041885	0.904465213
204	1	0	1	1	1	0.765909091	0.234090909	1	0.765909091	0.867438867	0.981782178	0.018217822	0.897013388	0.912041885	0.904465213
204	1	0	1	1	1	0.765909091	0.234090909	1	0.765909091	0.867438867	0.981782178	0.018217822	0.897013388	0.912041885	0.904465213
204	1	0	1	1	1	0.765909091	0.234090909	1	0.765909091	0.867438867	0.981782178	0.018217822	0.897013388	0.912041885	0.904465213
204	1	0	1	1	1	0.765909091	0.234090909	1	0.765909091	0.867438867	0.981782178	0.018217822	0.897013388	0.912041885	0.904465213
204	1	0	1	1	1	0.765909091	0.234090909	1	0.765909091	0.867438867	0.981782178	0.018217822	0.897013388	0.912041885	0.904465213
204	1	0	1	1	1	0.765909091	0.234090909	1	0.765909091	0.867438867	0.981782178	0.018217822	0.897013388	0.912041885	0.904465213
204	1	0	1	1	1	0.765909091	0.234090909	1	0.765909091	0.867438867	0.981782178	0.018217822	0.897013388	0.912041885	0.904465213
204	1	0	1	1	1	0.765909091	0.234090909	1	0.765909091	0.867438867	0.981782178	0.018217822	0.897013388	0.912041885	0.904465213
204	1	0	1	1	1	0.765909091	0.234090909	1	0.765909091	0.867438867	0.981782178	0.018217822	0.897013388	0.912041885	0.904465213
204	1	0	1	1	1	0.765909091	0.234090909	1	0.765909091	0.867438867	0.981782178	0.018217822	0.897013388	0.912041885	0.904465213
204	1	0	1	1	1	0.765909091	0.234090909	1	0.765909091	0.867438867	0.981782178	0.018217822	0.897013388	0.912041885	0.904465213
204	1	0	1	1	1	0.765909091	0.234090909	1	0.765909091	0.867438867	0.981782178	0.018217822	0.897013388	0.912041885	0.904465213
204	1	0	1	1	1	0.765909091	0.234090909	1	0.765909091	0.867438867	0.981782178	0.018217822	0.897013388	0.912041885	0.904465213
204	1	0	1	1	1	0.765909091	0.234090909	1	0.765909091	0.867438867	0.981782178	0.018217822	0.897013388	0.912041885	0.904465213
204	1	0	1	1	1	0.765909091	0.234090909	1	0.765909091	0.867438867	0.981782178	0.018217822	0.897013388	0.912041885	0.904465213
204	1	0	1	1	1	0.765909091	0.234090909	1	0.765909091	0.867438867	0.981782178	0.018217822	0.897013388	0.912041885	0.904465213
204	1	0	1	1	1	0.765909091	0.234090909	1	0.765909091	0.867438867	0.981782178	0.018217822	0.897013388	0.912041885	0.904465213
204	1	0	1	1	1	0.765909091	0.234090909	1	0.765909091	0.867438867	0.981782178	0.018217822	0.897013388	0.912041885	0.904465213
204	1	0	1	1	1	0.765909091	0.234090909	1	0.765909091	0.867438867	0.981782178	0.018217822	0.897013388	0.912041885	0.904465213
204	1	0	1	1	1	0.765909091	0.234090909	1	0.765909091	0.867438867	0.981782178	0.018217822	0.897013388	0.912041885	0.904465213
204	1	0	1	1	1	0.765909091	0.234090909	1	0.765909091	0.867438867	0.981782178	0.018217822	0.897013388	0.912041885	0.904465213
204	1	0	1	1	1	0.765909091	0.234090909	1	0.765909091	0.867438867	0.981782178	0.018217822	0.897013388	0.912041885	0.904465213
204	1	0	1	1	1	0.765909091	0.234090909	1	0.765909091	0.867438867	0.981782178	0.018217822	0.897013388	0.912041885	0.904465213
204	1	0	1	1	1	0.765909091	0.234090909	1	0.765909091	0.867438867	0.981782178	0.018217822	0.897013388	0.912041885	0.904465213
204	1	0	1	1	1	0.765909091	0.234090909	1	0.765909091	0.867438867	0.981782178	0.018217822	0.897013388	0.912041885	0.904465213
204	1	0	1	1	1	0.765909091	0.234090909	1	0.765909091	0.867438867	0.981782178	0.018217822	0.897013388	0.912041885	0.904465213
204	1	0	1	1	1	0.765909091	0.234090909	1	0.765909091	0.867438867	0.981782178	0.018217822	0.897013388	0.912041885	0.904465213
204	1	0	1	1	1	0.765909091	0.234090909	1	0.765909091	0.867438867	0.981782178	0.018217822	0.897013388	0.912041885	0.904465213
204	1	0	1	1	1	0.765909091	0.234090909	1	0.765909091	0.867438867	0.981782178	0.018217822	0.897013388	0.912041885	0.904465213
204	1	0	1	1	1	0.765909091	0.234090909	1	0.765909091	0.867438867	0.981782178	0.018217822	0.897013388	0.912041885	0.904465213
204	1	0	1	1	1	0.765909091	0.234090909	1	0.765909091	0.867438867	0.981782178	0.018217822	0.897013388	0.912041885	0.904465213
204	1	0	1	1	1	0.765909091	0.234090909	1	0.765909091	0.867438867	0.981782178	0.018217822	0.897013388	0.912041885	0.904465213
204	1	0	1	1	1	0.765909091	0.234090909	1	0.765909091	0.867438867	0.981782178	0.018217822	0.897013388	0.912041885	0.904465213
204	1	0	1	1	1	0.765909091	0.234090909	1	0.765909091	0.867438867	0.981782178	0.018217822	0.897013388	0.912041885	0.904465213
204	1	0	1	1	1	0.765909091	0.234090909	1	0.765909091	0.867438867	0.981782178	0.018217822	0.897013388	0.912041885	0.904465213
204	1	0	1	1	1	0.765909091	0.234090909	1	0.765909091	0.867438867	0.981782178	0.018217822	0.897013388	0.912041885	0.904465213
204	1	0	1	1	1	0.765909091	0.234090909	1	0.765909091	0.867438867	0.981782178	0.018217822	0.897013388	0.912041885	0.904465213
204	1	0	1	1	1	0.765909091	0.234090909	1	0.765909091	0.867438867	0.981782178	0.018217822	0.897013388	0.912041885	0.904465213
204	1	0	1	1	1	0.765909091	0.234090909	1	0.765909091	0.867438867	0.981782178	0.018217822	0.897013388	0.912041885	0.904465213
204	1	0	1	1	1	0.765909091	0.234090909	1	0.765909091	0.867438867	0.981782178	0.018217822	0.897013388	0.912041885	0.904465213
204	1	0	1	1	1	0.765909091	0.234090909	1	0.765909091	0.867438867	0.981782178	0.018217822	0.897013388	0.912041885	0.904465213
204	1	0	1	1	1	0.765909091	0.234090909	1	0.765909091	0.867438867	0.981782178	0.018217822	0.897013388	0.912041885	0.904465213
204	1	0	1	1	1	0.765909091	0.234090909	1	0.765909091	0.867438867	0.981782178	0.018217822	0.897013388	0.912041885	0.904465213
204	1	0	1	1	1	0.765909091	0.234090909	1	0.765909091	0.867438867	0.981782178	0.018217822	0.897013388	0.912041885	0.904465213
204	1	0	1	1	1	0.765909091	0.234090909	1	0.765909091	0.867438867	0.981782178	0.018217822	0.897013388	0.912041885	0.904465213
204	1	0	1	1	1	0.765909091	0.234090909	1	0.765909091	0.867438867	0.981782178	0.018217822	0.897013388	0.912041885	0.904465213
204	1	0	1	1	1	0.765909091	0.234090909	1	0.765909091	0.867438867	0.981782178	0.018217822	0.897013388	0.912041885	0.904465213
204	1	0	1	1	1	0.765909091	0.234090909	1	0.765909091	0.867438867	0.981782178	0.018217822	0.897013388	0.912041885	0.904465213
204	1	0	1	1	1	0.765909091	0.234090909	1	0.765909091	0.867438867	0.981782178	0.018217822	0.897013388	0.912041885	0.904465213
204	1	0	1	1	1	0.765909091	0.234090909	1	0.765909091	0.867438867	0.981782178	0.018217822	0.897013388	0.912041885	0.904465213
204	1	0	1	1	1	0.765909091	0.234090909	1	0.765909091	0.867438867	0.981782178	0.018217822	0.897013388	0.912041885	0.904465213
204	1	0	1	1	1	0.765909091	0.234090909	1	0.765909091	0.867438867	0.981782178	0.018217822	0.897013388	0.912041885	0.904465213
204	1	0	1	1	1	0.765909091	0.234090909	1	0.765909091	0.867438867	0.981782178	0.018217822	0.897013388	0.912041885	0.904465213
204	1	0	1	1	1	0.765909091	0.234090909	1	0.765909091	0.867438867	0.981782178	0.018217822	0.897013388	0.912041885	0.904465213
204	1	0	1	1	1	0.765909091	0.234090909	1	0.765909091	0.867438867	0.981782178	0.018217822	0.897013388	0.912041885	0.904465213
204	1	0	1	1	1	0.765909091	0.234090909	1	0.765909091	0.867438867	0.981782178	0.018217822	0.897013388	0.912041885	0.904465213
204	1	0	1	1	1	0.765909091	0.234090909	1	0.765909091	0.867438867	0.981782178	0.018217822	0.897013388	0.912041885	0.904465213
204	1	0	1	1	1	0.765909091	0.234090909	1	0.765909091	0.867438867	0.981782178	0.018217822	0.897013388	0.912041885	0.904465213
204	1	0	1	1	1	0.765909091	0.234090909	1	0.765909091	0.867438867	0.981782178	0.018217822	0.897013388	0.912041885	0.904465213
204	1	0	1	1	1	0.765909091	0.234090909	1	0.765909091	0.867438867	0.981782178	0.018217822	0.897013388	0.912041885	0.904465213
204	1	0	1	1	1	0.765909091	0.234090909	1	0.765909091	0.867438867	0.981782178	0.018217822	0.897013388	0.912041885	0.904465213
204	1	0	1	1	1	0.765909091	0.234090909	1	0.765909091	0.867438867	0.981782178	0.018217822	0.897013388	0.912041885	0.904465213
204	1	0	1	1	1	0.765909091	0.234090909	1	0.765909091	0.867438867	0.981782178	0.018217822	0.897013388	0.912041885	0.904465213
204	1	0	1	1	1	0.765909091	0.234090909	1	0.765909091	0.867438867	0.981782178	0.018217822	0.897013388	0.912041885	0.904465213
204	1	0	1	1	1	0.765909091	0.234090909	1	0.765909091	0.867438867	0.981782178	0.018217822	0.897013388	0.912041885	0.904465213
204	1	0	1	1	1	0.765909091	0.234090909	1	0.765909091	0.867438867	0.981782178	0.018217822	0.897013388	0.912041885	0.904465213
204	1	0	1	1	1	0.765909091	0.234090909	1	0.765909091	0.867438867	0.981782178	0.018217822	0.897013388	0.912041885	0.904465213
204	1	0	1	1	1	0.765909091	0.234090909	1	0.765909091	0.867438867	0.981782178	0.018217822	0.897013388	0.912041885	0.904465213
204	1	0	1	1	1	0.765909091	0.234090909	1	0.765909091	0.867438867	0.981782178	0.018217822	0.897013388	0.912041885	0.904465213
204	1	0	1	1	1	0.765909091	0.234090909	1	0.765909091	0.867438867	0.981782178	0.018217822	0.897013388	0.912041885	0.904465213
204	1	0	1	1	1	0.765909091	0.234090909	1	0.765909091	0.867438867	0.981782178	0.018217822	0.897013388	0.912041885	0.904465213
204	1	0	1	1	1	0.765909091	0.234090909	1	0.765909091	0.867438867	0.981782178	0.018217822	0.897013388	0.912041885	0.904465213
204	1	0	1	1	1	0.765909091	0.234090909	1	0.765909091	0.867438867	0.981782178	0.018217822	0.897013388	0.912041885	0.904465213
204	1	0	1	1	1	0.765909091	0.234090909	1	0.765909091	0.867438867	0.981782178	0.018217822	0.897013388	0.912041885	0.904465213
204	1	0	1	1	1	0.765909091	0.234090909	1	0.765909091	0.867438867	0.981782178	0.018217822	0.897013388	0.912041885	0.904465213
204	1	0	1	1	1	0.765909091	0.234090909	1	0.765909091	0.867438867	0.981782178	0.018217822	0.897013388	0.912041885	0.904465213
204	1	0	1	1	1	0.765909091	0.234090909	1	0.765909091	0.867438867	0.981782178	0.018217822	0.897013388	0.912041885	0.904465213
204	1	0	1	1	1	0.765909091	0.234090909	1	0.765909091	0.867438867	0.981782178	0.018217822	0.897013388	0.912041885	0.904465213
204	1	0	1	1	1	0.765909091	0.234090909	1	0.765909091	0.867438867	0.981782178	0.018217822	0.897013388	0.912041885	0.904465213
204	1	0	1	1	1	0.765909091	0.234090909	1	0.765909091	0.867438867	0.981782178	0.018217822	0.897013388	0.912041885	0.904465213
204	1	0	1	1	1	0.765909091	0.234090909	1	0.765909091	0.867438867	0.981782178	0.018217822	0.897013388	0.912041885	0.904465213
204	1	0	1	1	1	0.765909091	0.234090909	1	0.765909091	0.867438867	0.981782178	0.018217822	0.897013388	0.912041885	0.904465213
204	1	0	1	1	1	0.765909091	0.234090909	1	0.765909091	0.867438867	0.981782178	0.018217822	0.897013388	0.912041885	0.904465213
204	1	0	1	1	1	0.765909091	0.234090909	1	0.765909091	0.867438867	0.981782178	0.018217822	0.897013388	0.912041885	0.904465213
204	1	0	1	1	1	0.765909091	0.234090909	1	0.765909091	0.867438867	0.981782178	0.018217822	0.897013388	0.912041885	0.904465213
204	1	0	1	1	1	0.765909091	0.234090909	1	0.765909091	0.867438867	0.981782178	0.018217822	0.897013388	0.912041885	0.904465213
204	1	0	1	1	1	0.765909091	0.234090909	1	0.765909091	0.867438867	0.981782178	0.018217822	0.897013388	0.912041885	0.904465213
204	1	0	1	1	1	0.765909091	0.234090909	1	0.765909091	0.867438867	0.981782178	0.018217822	0.897013388	0.912041885	0.904465213
204	1	0	1	1	1	0.765909091	0.234090909	1	0.765909091	0.867438867	0.981782178	0.018217822	0.897013388	0.912041885	0.904465213
204	1	0	1	1	1	0.765909091	0.234090909	1	0.765909091	0.867438867	0.981782178	0.018217822	0.897013388	0.912041885	0.904465213
204	1	0	1	1	1	0.765909091	0.234090909	1	0.765909091	0.867438867	0.981782178	0.018217822	0.897013388	0.912041885	0.904465213
204	1	0	1	1	1	0.765909091	0.234090909	1	0.765909091	0.867438867	0.981782178	0.018217822	0.897013388	0.912041885	0.904465213
204	1	0	1	1	1	0.765909091	0.234090909	1	0.765909091	0.867438867	0.981782178	0.018217822	0.897013388	0.912041885	0.904465213
204	1	0	1	1	1	0.765909091	0.234090909	1	0.765909091	0.867438867	0.981782178	0.018217822	0.897013388	0.912041885	0.904465213
204	1	0	1	1	1	0.765909091	0.234090909	1	0.765909091	0.867438867	0.981782178	0.018217822	0.897013388	0.912041885	0.904465213
204	1	0	1	1	1	0.765909091	0.234090909	1	0.765909091	0.867438867	0.981782178	0.018217822	0.897013388	0.912041885	0.904465213
204	1	0	1	1	1	0.765909091	0.234090909	1	0.765909091	0.867438867	0.981782178	0.018217822	0.897013388	0.912041885	0.904465213
204	1	0	1	1	1	0.765909091	0.234090909	1	0.765909091	0.867438867	0.981782178	0.018217822	0.897013388	0.912041885	0.904465213
204	1	0	1	1	1	0.765909091	0.234090909	1	0.765909091	0.867438867	0.981782178	0.018217822	0.897013388	0.912041885	0.904465213
204	1	0	1	1	1	0.765909091	0.234090909	1	0.765909091	0.867438867	0.981782178	0.018217822	0.897013388	0.912041885	0.904465213
204	1	0	1	1	1	0.765909091	0.234090909	1	0.765909091	0.867438867	0.981782178	0.018217822	0.897013388	0.912041885	0.904465213
204	1	0	1	1	1	0.765909091	0.234090909	1	0.765909091	0.867438867	0.981782178	0.018217822	0.897013388	0.912041885	0.904465213
204	1	0	1	1	1	0.765909091	0.234090909	1	0.765909091	0.867438867	0.981782178	0.018217822	0.897013388	0.912041885	0.904465213
204	1	0	1	1	1	0.765909091	0.234090909	1	0.765909091	0.867438867	0.981782178	0.018217822	0.897013388	0.912041885	0.904465213
204	1	0	1	1	1	0.765909091	0.234090909	1	0.765909091	0.867438867	0.981782178	0.018217822	0.897013388	0.912041885	0.904465213
204	1	0	1	1	1	0.765909091	0.234090909	1	0.765909091	0.867438867	0.981782178	0.018217822	0.897013388	0.912041885	0.904465213
204	1	0	1	1	1	0.765909091	0.234090909	1	0.765909091	0.867438867	0.981782178	0.018217822	0.897013388	0.912041885	0.904465213
204	1	0	1	1	1	0.765909091	0.234090909	1	0.765909091	0.867438867	0.981782178	0.018217822	0.897013388	0.912041885	0.904465213
204	1	0	1	1	1	0.765909091	0.234090909	1	0.765909091	0.867438867	0.981782178	0.018217822	0.897013388	0.912041885	0.904465213
204	1	0	1	1	1	0.765909091	0.234090909	1	0.765909091	0.867438867	0.981782178	0.018217822	0.897013388	0.912041885	0.904465213
204	1	0	1	1	1	0.765909091	0.234090909	1	0.765909091	0.867438867	0.981782178	0.018217822	0.897013388	0.912041885	0.904465213
204	1	0	1	1	1	0.765909091	0.234090909	1	0.765909091	0.867438867	0.981782178	0.018217822	0.897013388	0.912041885	0.904465213
204	1	0	1	1	1	0.765909091	0.234090909	1	0.765909091	0.867438867	0.981782178	0.018217822	0.897013388	0.912041885	0.904465213
204	1	0	1	1	1	0.765909091	0.234090909	1	0.765909091	0.867438867	0.981782178	0.018217822	0.897013388	0.912041885	0.904465213
204	1	0	1	1	1	0.765909091	0.234090909	1	0.765909091	0.867438867	0.981782178	0.018217822	0.897013388	0.912041885	0.904465213
204	1	0	1	1	1	0.765909091	0.234090909	1	0.765909091	0.867438867	0.981782178	0.018217822	0.897013388	0.912041885	0.904465213
204	1	0	1	1	1	0.765909091	0.234090909	1	0.765909091	0.867438867	0.981782178	0.018217822	0.897013388	0.912041885	0.904465213
204	1	0	1	1	1	0.765909091	0.234090909	1	0.765909091	0.867438867	0.981782178	0.018217822	0.897013388	0.912041885	0.904465213
204	1	0	1	1	1	0.765909091	0.234090909	1	0.765909091	0.867438867	0.981782178	0.018217822	0.897013388	0.912041885	0.904465213
204	1	0	1	1	1	0.765909091	0.234090909	1	0.765909091	0.867438867	0.981782178	0.018217822	0.897013388	0.912041885	0.904465213
204	1	0	1	1	1	0.765909091	0.234090909	1	0.765909091	0.867438867	0.981782178	0.018217822	0.897013388	0.912041885	0.904465213
204	1	0	1	1	1	0.765909091	0.234090909	1	0.765909091	0.867438867	0.981782178	0.018217822	0.897013388	0.912041885	0.904465213
204	1	0	1	1	1	0.765909091	0.234090909	1	0.765909091	0.867438867	0.981782178	0.018217822	0.897013388	0.912041885	0.904465213
204	1	0	1	1	1	0.765909091	0.234090909	1	0.765909091	0.867438867	0.981782178	0.018217822	0.897013388	0.912041885	0.904465213
204	1	0	1	1	1	0.765909091	0.234090909	1	0.765909091	0.867438867	0.981782178	0.018217822	0.897013388	0.912041885	0.904465213
204	1	0	1	1	1	0.765909091	0.234090909	1	0.765909091	0.867438867	0.981782178	0.018217822	0.897013388	0.912041885	0.904465213
204	1	0	1	1	1	0.765909091	0.234090909	1	0.765909091	0.867438867	0.981782178	0.018217822	0.897013388	0.912041885	0.904465213
204	1	0	1	1	1	0.765909091	0.234090909	1	0.765909091	0.867438867	0.981782178	0.018217822	0.897013388	0.912041885	0.904465213
204	1	0	1	1	1	0.765909091	0.234090909	1	0.765909091	0.867438867	0.981782178	0.018217822	0.897013388	0.912041885	0.904465213
204	1	0	1	1	1	0.765909091	0.234090909	1	0.765909091	0.867438867	0.981782178	0.018217822	0.897013388	0.912041885	0.904465213
204	1	0	1	1	1	0.765909091	0.234090909	1	0.765909091	0.867438867	0.981782178	0.018217822	0.897013388	0.912041885	0.904465213
204	1	0	1	1	1	0.765909091	0.234090909	1	0.765909091	0.867438867	0.981782178	0.018217822	0.897013388	0.912041885	0.904465213
204	1	0	1	1	1	0.765909091	0.234090909	1	0.765909091	0.867438867	0.981782178	0.018217822	0.897013388	0.912041885	0.904465213
204	1	0	1	1	1	0.765909091	0.234090909	1	0.765909091	0.867438867	0.981782178	0.018217822	0.897013388	0.912041885	0.904465213
204	1	0	1	1	1	0.765909091	0.234090909	1	0.765909091	0.867438867	0.981782178	0.018217822	0.897013388	0.912041885	0.904465213
204	1	0	1	1	1	0.765909091	0.234090909	1	0.765909091	0.867438867	0.981782178	0.018217822	0.897013388	0.912041885	0.904465213
204	1	0	1	1	1	0.765909091	0.234090909	1	0.765909091	0.867438867	0.981782178	0.018217822	0.897013388	0.912041885	0.904465213
204	1	0	1	1	1	0.765909091	0.234090909	1	0.765909091	0.867438867	0.981782178	0.018217822	0.897013388	0.912041885	0.904465213
204	1	0	1	1	1	0.765909091	0.234090909	1	0.765909091	0.867438867	0.981782178	0.018217822	0.897013388	0.912041885	0.904465213
204	1	0	1	1	1	0.765909091	0.234090909	1	0.765909091	0.867438867	0.981782178	0.018217822	0.897013388	0.912041885	0.904465213
204	1	0	1	1	1	0.765909091	0.234090909	1	0.765909091	0.867438867	0.981782178	0.018217822	0.897013388	0.912041885	0.904465213
204	1	0	1	1	1	0.765909091	0.234090909	1	0.765909091	0.867438867	0.981782178	0.018217822	0.897013388	0.912041885	0.904465213
204	1	0	1	1	1	0.765909091	0.234090909	1	0.765909091	0.867438867	0.981782178	0.018217822	0.897013388	0.912041885	0.904465213
204	1	0	1	1	1	0.765909091	0.234090909	1	0.765909091	0.867438867	0.981782178	0.018217822	0.897013388	0.912041885	0.904465213
204	1	0	1	1	1	0.765909091	0.234090909	1	0.765909091	0.867438867	0.981782178	0.018217822	0.897013388	0.912041885	0.904465213
204	1	0	1	1	1	0.765909091	0.234090909	1	0.765909091	0.867438867	0.981782178	0.018217822	0.897013388	0.912041885	0.904465213
204	1	0	1	1	1	0.765909091	0.234090909	1	0.765909091	0.867438867	0.981782178	0.018217822	0.897013388	0.912041885	0.904465213
204	1	0	1	1	1	0.765909091	0.234090909	1	0.765909091	0.867438867	0.981782178	0.018217822	0.897013388	0.912041885	0.904465213
204	1	0	1	1	1	0.765909091	0.234090909	1	0.765909091	0.867438867	0.981782178	0.018217822	0.897013388	0.912041885	0.904465213
204	1	0	1	1	1	0.765909091	0.234090909	1	0.765909091	0.867438867	0.981782178	0.018217822	0.897013388	0.912041885	0.904465213
204	1	0	1	1	1	0.765909091	0.234090909	1	0.765909091	0.867438867	0.981782178	0.018217822	0.897013388	0.912041885	0.904465213
204	1	0	1	1	1	0.765909091	0.234090909	1	0.765909091	0.867438867	0.981782178	0.018217822	0.897013388	0.912041885	0.904465213
204	1	0	1	1	1	0.765909091	0.234090909	1	0.765909091	0.867438867	0.981782178	0.018217822	0.897013388	0.912041885	0.904465213
204	1	0	1	1	1	0.765909091	0.234090909	1	0.765909091	0.867438867	0.981782178	0.018217822	0.897013388	0.912041885	0.904465213
204	1	0	1	1	1	0.765909091	0.234090909	1	0.765909091	0.867438867	0.981782178	0.018217822	0.897013388	0.912041885	0.904465213
204	1	0	1	1	1	0.765909091	0.234090909	1	0.765909091	0.867438867	0.981782178	0.018217822	0.897013388	0.912041885	0.904465213
204	1	0	1	1	1	0.765909091	0.234090909	1	0.765909091	0.867438867	0.981782178	0.018217822	0.897013388	0.912041885	0.904465213
204	1	0	1	1	1	0.765909091	0.234090909	1	0.765909091	0.867438867	0.981782178	0.018217822	0.897013388	0.912041885	0.904465213
204	1	0	1	1	1	0.765909091	0.234090909	1	0.765909091	0.867438867	0.981782178	0.018217822	0.897013388	0.912041885	0.904465213
204	1	0	1	1	1	0.765909091	0.234090909	1	0.765909091	0.867438867	0.981782178	0.018217822	0.897013388	0.912041885	0.904465213
204	1	0	1	1	1	0.765909091	0.234090909	1	0.765909091	0.867438867	0.981782178	0.018217822	0.897013388	0.912041885	0.904465213
204	1	0	1	1	1	0.765909091	0.234090909	1	0.765909091	0.867438867	0.981782178	0.018217822	0.897013388	0.912041885	0.904465213
204	1	0	1	1	1	0.765909091	0.234090909	1	0.765909091	0.867438867	0.981782178	0.018217822	0.897013388	0.912041885	0.904465213
204	1	0	1	1	1	0.765909091	0.234090909	1	0.765909091	0.867438867	0.981782178	0.018217822	0.897013388	0.912041885	0.904465213
204	1	0	1	1	1	0.765909091	0.234090909	1	0.765909091	0.867438867	0.981782178	0.018217822	0.897013388	0.912041885	0.904465213
204	1	0	1	1	1	0.765909091	0.234090909	1	0.765909091	0.867438867	0.981782178	0.018217822	0.897013388	0.912041885	0.904465213
204	1	0	1	1	1	0.765909091	0.234090909	1	0.765909091	0.867438867	0.981782178	0.018217822	0.897013388	0.912041885	0.904465213
204	1	0	1	1	1	0.765909091	0.234090909	1	0.765909091	0.867438867	0.981782178	0.018217822	0.897013388	0.912041885	0.904465213
204	1	0	1	1	1	0.765909091	0.234090909	1	0.765909091	0.867438867	0.981782178	0.018217822	0.897013388	0.912041885	0.904465213
204	1	0	1	1	1	0.765909091	0.234090909	1	0.765909091	0.867438867	0.981782178	0.018217822	0.897013388	0.912041885	0.904465213
204	1	0	1	1	1	0.765909091	0.234090909	1	0.765909091	0.867438867	0.981782178	0.018217822	0.897013388	0.912041885	0.904465213
204	1	0	1	1	1	0.765909091	0.234090909	1	0.765909091	0.867438867	0.981782178	0.018217822	0.897013388	0.912041885	0.904465213
204	1	0	1	1	1	0.765909091	0.234090909	1	0.765909091	0.867438867	0.981782178	0.018217822	0.897013388	0.912041885	0.904465213
204	1	0	1	1	1	0.765909091	0.234090909	1	0.765909091	0.867438867	0.981782178	0.018217822	0.897013388	0.912041885	0.904465213
204	1	0	1	1	1	0.765909091	0.234090909	1	0.765909091	0.867438867	0.981782178	0.018217822	0.897013388	0.912041885	0.904465213
204	1	0	1	1	1	0.765909091	0.234090909	1	0.765909091	0.867438867	0.981782178	0.018217822	0.897013388	0.912041885	0.904465213
204	1	0	1	1	1	0.765909091	0.234090909	1	0.765909091	0.867438867	0.981782178	0.018217822	0.897013388	0.912041885	0.904465213
204	1	0	1	1	1	0.765909091	0.234090909	1	0.765909091	0.867438867	0.981782178	0.018217822	0.897013388	0.912041885	0.904465213
203	1	0	1	1	1	0.778021978	0.221978022	1	0.778021978	0.875154512	0.98215171	0.01784829	0.896659708	0.913829787	0.90516333
203	1	0	1	1	1	0.778021978	0.221978022	1	0.778021978	0.875154512	0.98215171	0.01784829	0.896659708	0.913829787	0.90516333
203	1	0	1	1	1	0.778021978	0.221978022	1	0.778021978	0.875154512	0.98215171	0.01784829	0.896659708	0.913829787	0.90516333
203	1	0	1	1	1	0.778021978	0.221978022	1	0.778021978	0.875154512	0.98215171	0.01784829	0.896659708	0.913829787	0.90516333
203	1	0	1	1	1	0.778021978	0.221978022	1	0.778021978	0.875154512	0.98215171	0.01784829	0.896659708	0.913829787	0.90516333
203	1	0	1	1	1	0.778021978	0.221978022	1	0.778021978	0.875154512	0.98215171	0.01784829	0.896659708	0.913829787	0.90516333
202	1	0	1	1	1	0.78021978	0.21978022	1	0.78021978	0.87654321	0.98215171	0.01784829	0.896659708	0.913829787	0.90516333
202	1	0	1	1	1	0.78021978	0.21978022	1	0.78021978	0.87654321	0.98215171	0.01784829	0.896659708	0.913829787	0.90516333
201	1	0	1	1	1	0.78021978	0.21978022	1	0.78021978	0.87654321	0.98215171	0.01784829	0.896659708	0.913829787	0.90516333
201	1	0	1	1	1	0.78021978	0.21978022	1	0.78021978	0.87654321	0.98215171	0.01784829	0.896659708	0.913829787	0.90516333
201	1	0	1	1	1	0.78021978	0.21978022	1	0.78021978	0.87654321	0.98215171	0.01784829	0.896659708	0.913829787	0.90516333
201	1	0	1	1	1	0.78021978	0.21978022	1	0.78021978	0.87654321	0.98215171	0.01784829	0.896659708	0.913829787	0.90516333
201	1	0	1	1	1	0.78021978	0.21978022	1	0.78021978	0.87654321	0.98215171	0.01784829	0.896659708	0.913829787	0.90516333
201	1	0	1	1	1	0.78021978	0.21978022	1	0.78021978	0.87654321	0.98215171	0.01784829	0.896659708	0.913829787	0.90516333
201	1	0	1	1	1	0.78021978	0.21978022	1	0.78021978	0.87654321	0.98215171	0.01784829	0.896659708	0.913829787	0.90516333
201	1	0	1	1	1	0.78021978	0.21978022	1	0.78021978	0.87654321	0.98215171	0.01784829	0.896659708	0.913829787	0.90516333
201	1	0	1	1	1	0.78021978	0.21978022	1	0.78021978	0.87654321	0.98215171	0.01784829	0.896659708	0.913829787	0.90516333
201	1	0	1	1	1	0.78021978	0.21978022	1	0.78021978	0.87654321	0.98215171	0.01784829	0.896659708	0.913829787	0.90516333
201	1	0	1	1	1	0.78021978	0.21978022	1	0.78021978	0.87654321	0.98215171	0.01784829	0.896659708	0.913829787	0.90516333
201	1	0	1	1	1	0.78021978	0.21978022	1	0.78021978	0.87654321	0.98215171	0.01784829	0.896659708	0.913829787	0.90516333
201	1	0	1	1	1	0.78021978	0.21978022	1	0.78021978	0.87654321	0.98215171	0.01784829	0.896659708	0.913829787	0.90516333
201	1	0	1	1	1	0.78021978	0.21978022	1	0.78021978	0.87654321	0.98215171	0.01784829	0.896659708	0.913829787	0.90516333
201	1	0	1	1	1	0.78021978	0.21978022	1	0.78021978	0.87654321	0.98215171	0.01784829	0.896659708	0.913829787	0.90516333
200	1	0	1	1	1	0.780701754	0.219298246	1	0.780701754	0.876847291	0.98214994	0.01785006	0.896551724	0.913738019	0.905063291
200	1	0	1	1	1	0.780701754	0.219298246	1	0.780701754	0.876847291	0.98214994	0.01785006	0.896551724	0.913738019	0.905063291
200	1	0	1	1	1	0.780701754	0.219298246	1	0.780701754	0.876847291	0.98214994	0.01785006	0.896551724	0.913738019	0.905063291
200	1	0	1	1	1	0.780701754	0.219298246	1	0.780701754	0.876847291	0.98214994	0.01785006	0.896551724	0.913738019	0.905063291
200	1	0	1	1	1	0.780701754	0.219298246	1	0.780701754	0.876847291	0.98214994	0.01785006	0.896551724	0.913738019	0.905063291
200	1	0	1	1	1	0.780701754	0.219298246	1	0.780701754	0.876847291	0.98214994	0.01785006	0.896551724	0.913738019	0.905063291
200	1	0	1	1	1	0.780701754	0.219298246	1	0.780701754	0.876847291	0.98214994	0.01785006	0.896551724	0.913738019	0.905063291
200	1	0	1	1	1	0.780701754	0.219298246	1	0.780701754	0.876847291	0.98214994	0.01785006	0.896551724	0.913738019	0.905063291
200	1	0	1	1	1	0.780701754	0.219298246	1	0.780701754	0.876847291	0.98214994	0.01785006	0.896551724	0.913738019	0.905063291
200	1	0	1	1	1	0.780701754	0.219298246	1	0.780701754	0.876847291	0.98214994	0.01785006	0.896551724	0.913738019	0.905063291
200	1	0	1	1	1	0.780701754	0.219298246	1	0.780701754	0.876847291	0.98214994	0.01785006	0.896551724	0.913738019	0.905063291
199	1	0	1	1	1	0.782417582	0.217582418	1	0.782417582	0.877928483	0.98215171	0.01784829	0.896659708	0.913829787	0.90516333
199	1	0	1	1	1	0.782417582	0.217582418	1	0.782417582	0.877928483	0.98215171	0.01784829	0.896659708	0.913829787	0.90516333
199	1	0	1	1	1	0.782417582	0.217582418	1	0.782417582	0.877928483	0.98215171	0.01784829	0.896659708	0.913829787	0.90516333
199	1	0	1	1	1	0.782417582	0.217582418	1	0.782417582	0.877928483	0.98215171	0.01784829	0.896659708	0.913829787	0.90516333
199	1	0	1	1	1	0.782417582	0.217582418	1	0.782417582	0.877928483	0.98215171	0.01784829	0.896659708	0.913829787	0.90516333
199	1	0	1	1	1	0.782417582	0.217582418	1	0.782417582	0.877928483	0.98215171	0.01784829	0.896659708	0.913829787	0.90516333
199	1	0	1	1	1	0.782417582	0.217582418	1	0.782417582	0.877928483	0.98215171	0.01784829	0.896659708	0.913829787	0.90516333
199	1	0	1	1	1	0.782417582	0.217582418	1	0.782417582	0.877928483	0.98215171	0.01784829	0.896659708	0.913829787	0.90516333
199	1	0	1	1	1	0.782417582	0.217582418	1	0.782417582	0.877928483	0.98215171	0.01784829	0.896659708	0.913829787	0.90516333
198	1	0	1	1	1	0.782417582	0.217582418	1	0.782417582	0.877928483	0.98215171	0.01784829	0.896659708	0.913829787	0.90516333
197	1	0	1	1	1	0.782417582	0.217582418	1	0.782417582	0.877928483	0.98215171	0.01784829	0.896659708	0.913829787	0.90516333
197	1	0	1	1	1	0.782417582	0.217582418	1	0.782417582	0.877928483	0.98215171	0.01784829	0.896659708	0.913829787	0.90516333
197	1	0	1	1	1	0.782417582	0.217582418	1	0.782417582	0.877928483	0.98215171	0.01784829	0.896659708	0.913829787	0.90516333
197	1	0	1	1	1	0.782417582	0.217582418	1	0.782417582	0.877928483	0.98215171	0.01784829	0.896659708	0.913829787	0.90516333
197	1	0	1	1	1	0.782417582	0.217582418	1	0.782417582	0.877928483	0.98215171	0.01784829	0.896659708	0.913829787	0.90516333
197	1	0	1	1	1	0.782417582	0.217582418	1	0.782417582	0.877928483	0.98215171	0.01784829	0.896659708	0.913829787	0.90516333
196	1	0	1	1	1	0.782417582	0.217582418	1	0.782417582	0.877928483	0.98215171	0.01784829	0.896659708	0.913829787	0.90516333
196	1	0	1	1	1	0.782417582	0.217582418	1	0.782417582	0.877928483	0.98215171	0.01784829	0.896659708	0.913829787	0.90516333
196	1	0	1	1	1	0.782417582	0.217582418	1	0.782417582	0.877928483	0.98215171	0.01784829	0.896659708	0.913829787	0.90516333
196	1	0	1	1	1	0.782417582	0.217582418	1	0.782417582	0.877928483	0.98215171	0.01784829	0.896659708	0.913829787	0.90516333
196	1	0	1	1	1	0.782417582	0.217582418	1	0.782417582	0.877928483	0.98215171	0.01784829	0.896659708	0.913829787	0.90516333
196	1	0	1	1	1	0.782417582	0.217582418	1	0.782417582	0.877928483	0.98215171	0.01784829	0.896659708	0.913829787	0.90516333
196	1	0	1	1	1	0.782417582	0.217582418	1	0.782417582	0.877928483	0.98215171	0.01784829	0.896659708	0.913829787	0.90516333
195	1	0	1	1	1	0.782417582	0.217582418	1	0.782417582	0.877928483	0.98215171	0.01784829	0.896659708	0.913829787	0.90516333
195	1	0	1	1	1	0.782417582	0.217582418	1	0.782417582	0.877928483	0.98215171	0.01784829	0.896659708	0.913829787	0.90516333
195	1	0	1	1	1	0.782417582	0.217582418	1	0.782417582	0.877928483	0.98215171	0.01784829	0.896659708	0.913829787	0.90516333
195	1	0	1	1	1	0.782417582	0.217582418	1	0.782417582	0.877928483	0.98215171	0.01784829	0.896659708	0.913829787	0.90516333
195	1	0	1	1	1	0.782417582	0.217582418	1	0.782417582	0.877928483	0.98215171	0.01784829	0.896659708	0.913829787	0.90516333
195	1	0	1	1	1	0.782417582	0.217582418	1	0.782417582	0.877928483	0.98215171	0.01784829	0.896659708	0.913829787	0.90516333
195	1	0	1	1	1	0.782417582	0.217582418	1	0.782417582	0.877928483	0.98215171	0.01784829	0.896659708	0.913829787	0.90516333
195	1	0	1	1	1	0.782417582	0.217582418	1	0.782417582	0.877928483	0.98215171	0.01784829	0.896659708	0.913829787	0.90516333
195	1	0	1	1	1	0.782417582	0.217582418	1	0.782417582	0.877928483	0.98215171	0.01784829	0.896659708	0.913829787	0.90516333
195	1	0	1	1	1	0.782417582	0.217582418	1	0.782417582	0.877928483	0.98215171	0.01784829	0.896659708	0.913829787	0.90516333
195	1	0	1	1	1	0.782417582	0.217582418	1	0.782417582	0.877928483	0.98215171	0.01784829	0.896659708	0.913829787	0.90516333
195	1	0	1	1	1	0.782417582	0.217582418	1	0.782417582	0.877928483	0.98215171	0.01784829	0.896659708	0.913829787	0.90516333
195	1	0	1	1	1	0.782417582	0.217582418	1	0.782417582	0.877928483	0.98215171	0.01784829	0.896659708	0.913829787	0.90516333
195	1	0	1	1	1	0.782417582	0.217582418	1	0.782417582	0.877928483	0.98215171	0.01784829	0.896659708	0.913829787	0.90516333
195	1	0	1	1	1	0.782417582	0.217582418	1	0.782417582	0.877928483	0.98215171	0.01784829	0.896659708	0.913829787	0.90516333
194	1	0	1	1	1	0.782417582	0.217582418	1	0.782417582	0.877928483	0.98215171	0.01784829	0.896659708	0.913829787	0.90516333
194	1	0	1	1	1	0.782417582	0.217582418	1	0.782417582	0.877928483	0.98215171	0.01784829	0.896659708	0.913829787	0.90516333
194	1	0	1	1	1	0.782417582	0.217582418	1	0.782417582	0.877928483	0.98215171	0.01784829	0.896659708	0.913829787	0.90516333
194	1	0	1	1	1	0.782417582	0.217582418	1	0.782417582	0.877928483	0.98215171	0.01784829	0.896659708	0.913829787	0.90516333
194	1	0	1	1	1	0.782417582	0.217582418	1	0.782417582	0.877928483	0.98215171	0.01784829	0.896659708	0.913829787	0.90516333
194	1	0	1	1	1	0.782417582	0.217582418	1	0.782417582	0.877928483	0.98215171	0.01784829	0.896659708	0.913829787	0.90516333
194	1	0	1	1	1	0.782417582	0.217582418	1	0.782417582	0.877928483	0.98215171	0.01784829	0.896659708	0.913829787	0.90516333
194	1	0	1	1	1	0.782417582	0.217582418	1	0.782417582	0.877928483	0.98215171	0.01784829	0.896659708	0.913829787	0.90516333
194	1	0	1	1	1	0.782417582	0.217582418	1	0.782417582	0.877928483	0.98215171	0.01784829	0.896659708	0.913829787	0.90516333
194	1	0	1	1	1	0.782417582	0.217582418	1	0.782417582	0.877928483	0.98215171	0.01784829	0.896659708	0.913829787	0.90516333
194	1	0	1	1	1	0.782417582	0.217582418	1	0.782417582	0.877928483	0.98215171	0.01784829	0.896659708	0.913829787	0.90516333
194	1	0	1	1	1	0.782417582	0.217582418	1	0.782417582	0.877928483	0.98215171	0.01784829	0.896659708	0.913829787	0.90516333
194	1	0	1	1	1	0.782417582	0.217582418	1	0.782417582	0.877928483	0.98215171	0.01784829	0.896659708	0.913829787	0.90516333
194	1	0	1	1	1	0.782417582	0.217582418	1	0.782417582	0.877928483	0.98215171	0.01784829	0.896659708	0.913829787	0.90516333
194	1	0	1	1	1	0.782417582	0.217582418	1	0.782417582	0.877928483	0.98215171	0.01784829	0.896659708	0.913829787	0.90516333
194	1	0	1	1	1	0.782417582	0.217582418	1	0.782417582	0.877928483	0.98215171	0.01784829	0.896659708	0.913829787	0.90516333
194	1	0	1	1	1	0.782417582	0.217582418	1	0.782417582	0.877928483	0.98215171	0.01784829	0.896659708	0.913829787	0.90516333
194	1	0	1	1	1	0.782417582	0.217582418	1	0.782417582	0.877928483	0.98215171	0.01784829	0.896659708	0.913829787	0.90516333
194	1	0	1	1	1	0.782417582	0.217582418	1	0.782417582	0.877928483	0.98215171	0.01784829	0.896659708	0.913829787	0.90516333
194	1	0	1	1	1	0.782417582	0.217582418	1	0.782417582	0.877928483	0.98215171	0.01784829	0.896659708	0.913829787	0.90516333
194	1	0	1	1	1	0.782417582	0.217582418	1	0.782417582	0.877928483	0.98215171	0.01784829	0.896659708	0.913829787	0.90516333
194	1	0	1	1	1	0.782417582	0.217582418	1	0.782417582	0.877928483	0.98215171	0.01784829	0.896659708	0.913829787	0.90516333
194	1	0	1	1	1	0.782417582	0.217582418	1	0.782417582	0.877928483	0.98215171	0.01784829	0.896659708	0.913829787	0.90516333
194	1	0	1	1	1	0.782417582	0.217582418	1	0.782417582	0.877928483	0.98215171	0.01784829	0.896659708	0.913829787	0.90516333
194	1	0	1	1	1	0.782417582	0.217582418	1	0.782417582	0.877928483	0.98215171	0.01784829	0.896659708	0.913829787	0.90516333
194	1	0	1	1	1	0.782417582	0.217582418	1	0.782417582	0.877928483	0.98215171	0.01784829	0.896659708	0.913829787	0.90516333
194	1	0	1	1	1	0.782417582	0.217582418	1	0.782417582	0.877928483	0.98215171	0.01784829	0.896659708	0.913829787	0.90516333
194	1	0	1	1	1	0.782417582	0.217582418	1	0.782417582	0.877928483	0.98215171	0.01784829	0.896659708	0.913829787	0.90516333
194	1	0	1	1	1	0.782417582	0.217582418	1	0.782417582	0.877928483	0.98215171	0.01784829	0.896659708	0.913829787	0.90516333
194	1	0	1	1	1	0.782417582	0.217582418	1	0.782417582	0.877928483	0.98215171	0.01784829	0.896659708	0.913829787	0.90516333
194	1	0	1	1	1	0.782417582	0.217582418	1	0.782417582	0.877928483	0.98215171	0.01784829	0.896659708	0.913829787	0.90516333
194	1	0	1	1	1	0.782417582	0.217582418	1	0.782417582	0.877928483	0.98215171	0.01784829	0.896659708	0.913829787	0.90516333
194	1	0	1	1	1	0.782417582	0.217582418	1	0.782417582	0.877928483	0.98215171	0.01784829	0.896659708	0.913829787	0.90516333
194	1	0	1	1	1	0.782417582	0.217582418	1	0.782417582	0.877928483	0.98215171	0.01784829	0.896659708	0.913829787	0.90516333
194	1	0	1	1	1	0.782417582	0.217582418	1	0.782417582	0.877928483	0.98215171	0.01784829	0.896659708	0.913829787	0.90516333
194	1	0	1	1	1	0.782417582	0.217582418	1	0.782417582	0.877928483	0.98215171	0.01784829	0.896659708	0.913829787	0.90516333
194	1	0	1	1	1	0.782417582	0.217582418	1	0.782417582	0.877928483	0.98215171	0.01784829	0.896659708	0.913829787	0.90516333
194	1	0	1	1	1	0.782417582	0.217582418	1	0.782417582	0.877928483	0.98215171	0.01784829	0.896659708	0.913829787	0.90516333
194	1	0	1	1	1	0.782417582	0.217582418	1	0.782417582	0.877928483	0.98215171	0.01784829	0.896659708	0.913829787	0.90516333
194	1	0	1	1	1	0.782417582	0.217582418	1	0.782417582	0.877928483	0.98215171	0.01784829	0.896659708	0.913829787	0.90516333
194	1	0	1	1	1	0.782417582	0.217582418	1	0.782417582	0.877928483	0.98215171	0.01784829	0.896659708	0.913829787	0.90516333
194	1	0	1	1	1	0.782417582	0.217582418	1	0.782417582	0.877928483	0.98215171	0.01784829	0.896659708	0.913829787	0.90516333
194	1	0	1	1	1	0.782417582	0.217582418	1	0.782417582	0.877928483	0.98215171	0.01784829	0.896659708	0.913829787	0.90516333
194	1	0	1	1	1	0.782417582	0.217582418	1	0.782417582	0.877928483	0.98215171	0.01784829	0.896659708	0.913829787	0.90516333
194	1	0	1	1	1	0.782417582	0.217582418	1	0.782417582	0.877928483	0.98215171	0.01784829	0.896659708	0.913829787	0.90516333
194	1	0	1	1	1	0.782417582	0.217582418	1	0.782417582	0.877928483	0.98215171	0.01784829	0.896659708	0.913829787	0.90516333
194	1	0	1	1	1	0.782417582	0.217582418	1	0.782417582	0.877928483	0.98215171	0.01784829	0.896659708	0.913829787	0.90516333
194	1	0	1	1	1	0.782417582	0.217582418	1	0.782417582	0.877928483	0.98215171	0.01784829	0.896659708	0.913829787	0.90516333
194	1	0	1	1	1	0.782417582	0.217582418	1	0.782417582	0.877928483	0.98215171	0.01784829	0.896659708	0.913829787	0.90516333
194	1	0	1	1	1	0.782417582	0.217582418	1	0.782417582	0.877928483	0.98215171	0.01784829	0.896659708	0.913829787	0.90516333
194	1	0	1	1	1	0.782417582	0.217582418	1	0.782417582	0.877928483	0.98215171	0.01784829	0.896659708	0.913829787	0.90516333
194	1	0	1	1	1	0.782417582	0.217582418	1	0.782417582	0.877928483	0.98215171	0.01784829	0.896659708	0.913829787	0.90516333
194	1	0	1	1	1	0.782417582	0.217582418	1	0.782417582	0.877928483	0.98215171	0.01784829	0.896659708	0.913829787	0.90516333
194	1	0	1	1	1	0.782417582	0.217582418	1	0.782417582	0.877928483	0.98215171	0.01784829	0.896659708	0.913829787	0.90516333
194	1	0	1	1	1	0.782417582	0.217582418	1	0.782417582	0.877928483	0.98215171	0.01784829	0.896659708	0.913829787	0.90516333
194	1	0	1	1	1	0.782417582	0.217582418	1	0.782417582	0.877928483	0.98215171	0.01784829	0.896659708	0.913829787	0.90516333
194	1	0	1	1	1	0.782417582	0.217582418	1	0.782417582	0.877928483	0.98215171	0.01784829	0.896659708	0.913829787	0.90516333
194	1	0	1	1	1	0.782417582	0.217582418	1	0.782417582	0.877928483	0.98215171	0.01784829	0.896659708	0.913829787	0.90516333
194	1	0	1	1	1	0.782417582	0.217582418	1	0.782417582	0.877928483	0.98215171	0.01784829	0.896659708	0.913829787	0.90516333
194	1	0	1	1	1	0.782417582	0.217582418	1	0.782417582	0.877928483	0.98215171	0.01784829	0.896659708	0.913829787	0.90516333
194	1	0	1	1	1	0.782417582	0.217582418	1	0.782417582	0.877928483	0.98215171	0.01784829	0.896659708	0.913829787	0.90516333
194	1	0	1	1	1	0.782417582	0.217582418	1	0.782417582	0.877928483	0.98215171	0.01784829	0.896659708	0.913829787	0.90516333
194	1	0	1	1	1	0.782417582	0.217582418	1	0.782417582	0.877928483	0.98215171	0.01784829	0.896659708	0.913829787	0.90516333
194	1	0	1	1	1	0.782417582	0.217582418	1	0.782417582	0.877928483	0.98215171	0.01784829	0.896659708	0.913829787	0.90516333
194	1	0	1	1	1	0.782417582	0.217582418	1	0.782417582	0.877928483	0.98215171	0.01784829	0.896659708	0.913829787	0.90516333
194	1	0	1	1	1	0.782417582	0.217582418	1	0.782417582	0.877928483	0.98215171	0.01784829	0.896659708	0.913829787	0.90516333
194	1	0	1	1	1	0.782417582	0.217582418	1	0.782417582	0.877928483	0.98215171	0.01784829	0.896659708	0.913829787	0.90516333
194	1	0	1	1	1	0.782417582	0.217582418	1	0.782417582	0.877928483	0.98215171	0.01784829	0.896659708	0.913829787	0.90516333
194	1	0	1	1	1	0.782417582	0.217582418	1	0.782417582	0.877928483	0.98215171	0.01784829	0.896659708	0.913829787	0.90516333
194	1	0	1	1	1	0.782417582	0.217582418	1	0.782417582	0.877928483	0.98215171	0.01784829	0.896659708	0.913829787	0.90516333
194	1	0	1	1	1	0.782417582	0.217582418	1	0.782417582	0.877928483	0.98215171	0.01784829	0.896659708	0.913829787	0.90516333
194	1	0	1	1	1	0.782417582	0.217582418	1	0.782417582	0.877928483	0.98215171	0.01784829	0.896659708	0.913829787	0.90516333
194	1	0	1	1	1	0.782417582	0.217582418	1	0.782417582	0.877928483	0.98215171	0.01784829	0.896659708	0.913829787	0.90516333
194	1	0	1	1	1	0.782417582	0.217582418	1	0.782417582	0.877928483	0.98215171	0.01784829	0.896659708	0.913829787	0.90516333
194	1	0	1	1	1	0.782417582	0.217582418	1	0.782417582	0.877928483	0.98215171	0.01784829	0.896659708	0.913829787	0.90516333
194	1	0	1	1	1	0.782417582	0.217582418	1	0.782417582	0.877928483	0.98215171	0.01784829	0.896659708	0.913829787	0.90516333
194	1	0	1	1	1	0.782417582	0.217582418	1	0.782417582	0.877928483	0.98215171	0.01784829	0.896659708	0.913829787	0.90516333
194	1	0	1	1	1	0.782417582	0.217582418	1	0.782417582	0.877928483	0.98215171	0.01784829	0.896659708	0.913829787	0.90516333
