# Supplementary material for: An Improved Hybrid Feature Selection Algorithm for Electric Charge Recovery Risk
Source: Hindawi journal article supplement (doi:10.1155/2020/8479341), 2020-08-28
Supplement: f1 [file 8479341.f1.zip › 8479341.f1/Experimental Results/201807/BABC_results.csv]

features_num	Accuracy_high	Loss_high	Precission_high	Recall_high	F1_high	Accuracy_med	Loss_med	Precission_med	Recall_med	F1_med	Accuracy_low	Loss_low	Precission_low	Recall_low	F1_low
295	1.0	0.0	1.0	1.0	1.0	0.830393487109905	0.16960651289009498	0.9901153212520593	0.8347222222222223	0.9058025621703089	0.931586752347998	0.06841324765200196	0.47965367965367967	0.8589147286821706	0.6155555555555556
295	1.0	0.0	1.0	1.0	1.0	0.830393487109905	0.16960651289009498	0.9901153212520593	0.8347222222222223	0.9058025621703089	0.931586752347998	0.06841324765200196	0.47965367965367967	0.8589147286821706	0.6155555555555556
295	1.0	0.0	1.0	1.0	1.0	0.830393487109905	0.16960651289009498	0.9901153212520593	0.8347222222222223	0.9058025621703089	0.931586752347998	0.06841324765200196	0.47965367965367967	0.8589147286821706	0.6155555555555556
295	1.0	0.0	1.0	1.0	1.0	0.830393487109905	0.16960651289009498	0.9901153212520593	0.8347222222222223	0.9058025621703089	0.931586752347998	0.06841324765200196	0.47965367965367967	0.8589147286821706	0.6155555555555556
295	1.0	0.0	1.0	1.0	1.0	0.830393487109905	0.16960651289009498	0.9901153212520593	0.8347222222222223	0.9058025621703089	0.931586752347998	0.06841324765200196	0.47965367965367967	0.8589147286821706	0.6155555555555556
295	1.0	0.0	1.0	1.0	1.0	0.830393487109905	0.16960651289009498	0.9901153212520593	0.8347222222222223	0.9058025621703089	0.931586752347998	0.06841324765200196	0.47965367965367967	0.8589147286821706	0.6155555555555556
295	1.0	0.0	1.0	1.0	1.0	0.830393487109905	0.16960651289009498	0.9901153212520593	0.8347222222222223	0.9058025621703089	0.931586752347998	0.06841324765200196	0.47965367965367967	0.8589147286821706	0.6155555555555556
295	1.0	0.0	1.0	1.0	1.0	0.830393487109905	0.16960651289009498	0.9901153212520593	0.8347222222222223	0.9058025621703089	0.931586752347998	0.06841324765200196	0.47965367965367967	0.8589147286821706	0.6155555555555556
295	1.0	0.0	1.0	1.0	1.0	0.830393487109905	0.16960651289009498	0.9901153212520593	0.8347222222222223	0.9058025621703089	0.931586752347998	0.06841324765200196	0.47965367965367967	0.8589147286821706	0.6155555555555556
295	1.0	0.0	1.0	1.0	1.0	0.830393487109905	0.16960651289009498	0.9901153212520593	0.8347222222222223	0.9058025621703089	0.931586752347998	0.06841324765200196	0.47965367965367967	0.8589147286821706	0.6155555555555556
295	1.0	0.0	1.0	1.0	1.0	0.830393487109905	0.16960651289009498	0.9901153212520593	0.8347222222222223	0.9058025621703089	0.931586752347998	0.06841324765200196	0.47965367965367967	0.8589147286821706	0.6155555555555556
337	1.0	0.0	1.0	1.0	1.0	0.8853503184713376	0.1146496815286624	0.9477401129943502	0.9267955801104972	0.9371508379888267	0.9360767079504595	0.0639232920495405	0.47378640776699027	0.8327645051194539	0.6039603960396039
337	1.0	0.0	1.0	1.0	1.0	0.8853503184713376	0.1146496815286624	0.9477401129943502	0.9267955801104972	0.9371508379888267	0.9360767079504595	0.0639232920495405	0.47378640776699027	0.8327645051194539	0.6039603960396039
337	1.0	0.0	1.0	1.0	1.0	0.8853503184713376	0.1146496815286624	0.9477401129943502	0.9267955801104972	0.9371508379888267	0.9360767079504595	0.0639232920495405	0.47378640776699027	0.8327645051194539	0.6039603960396039
337	1.0	0.0	1.0	1.0	1.0	0.8853503184713376	0.1146496815286624	0.9477401129943502	0.9267955801104972	0.9371508379888267	0.9360767079504595	0.0639232920495405	0.47378640776699027	0.8327645051194539	0.6039603960396039
337	1.0	0.0	1.0	1.0	1.0	0.8853503184713376	0.1146496815286624	0.9477401129943502	0.9267955801104972	0.9371508379888267	0.9360767079504595	0.0639232920495405	0.47378640776699027	0.8327645051194539	0.6039603960396039
337	1.0	0.0	1.0	1.0	1.0	0.8853503184713376	0.1146496815286624	0.9477401129943502	0.9267955801104972	0.9371508379888267	0.9360767079504595	0.0639232920495405	0.47378640776699027	0.8327645051194539	0.6039603960396039
337	1.0	0.0	1.0	1.0	1.0	0.8853503184713376	0.1146496815286624	0.9477401129943502	0.9267955801104972	0.9371508379888267	0.9360767079504595	0.0639232920495405	0.47378640776699027	0.8327645051194539	0.6039603960396039
337	1.0	0.0	1.0	1.0	1.0	0.8853503184713376	0.1146496815286624	0.9477401129943502	0.9267955801104972	0.9371508379888267	0.9360767079504595	0.0639232920495405	0.47378640776699027	0.8327645051194539	0.6039603960396039
337	1.0	0.0	1.0	1.0	1.0	0.8853503184713376	0.1146496815286624	0.9477401129943502	0.9267955801104972	0.9371508379888267	0.9360767079504595	0.0639232920495405	0.47378640776699027	0.8327645051194539	0.6039603960396039
337	1.0	0.0	1.0	1.0	1.0	0.8853503184713376	0.1146496815286624	0.9477401129943502	0.9267955801104972	0.9371508379888267	0.9360767079504595	0.0639232920495405	0.47378640776699027	0.8327645051194539	0.6039603960396039
337	1.0	0.0	1.0	1.0	1.0	0.8853503184713376	0.1146496815286624	0.9477401129943502	0.9267955801104972	0.9371508379888267	0.9360767079504595	0.0639232920495405	0.47378640776699027	0.8327645051194539	0.6039603960396039
337	1.0	0.0	1.0	1.0	1.0	0.8853503184713376	0.1146496815286624	0.9477401129943502	0.9267955801104972	0.9371508379888267	0.9360767079504595	0.0639232920495405	0.47378640776699027	0.8327645051194539	0.6039603960396039
337	1.0	0.0	1.0	1.0	1.0	0.8853503184713376	0.1146496815286624	0.9477401129943502	0.9267955801104972	0.9371508379888267	0.9360767079504595	0.0639232920495405	0.47378640776699027	0.8327645051194539	0.6039603960396039
337	1.0	0.0	1.0	1.0	1.0	0.8853503184713376	0.1146496815286624	0.9477401129943502	0.9267955801104972	0.9371508379888267	0.9360767079504595	0.0639232920495405	0.47378640776699027	0.8327645051194539	0.6039603960396039
337	1.0	0.0	1.0	1.0	1.0	0.8853503184713376	0.1146496815286624	0.9477401129943502	0.9267955801104972	0.9371508379888267	0.9360767079504595	0.0639232920495405	0.47378640776699027	0.8327645051194539	0.6039603960396039
337	1.0	0.0	1.0	1.0	1.0	0.8853503184713376	0.1146496815286624	0.9477401129943502	0.9267955801104972	0.9371508379888267	0.9360767079504595	0.0639232920495405	0.47378640776699027	0.8327645051194539	0.6039603960396039
337	1.0	0.0	1.0	1.0	1.0	0.8853503184713376	0.1146496815286624	0.9477401129943502	0.9267955801104972	0.9371508379888267	0.9360767079504595	0.0639232920495405	0.47378640776699027	0.8327645051194539	0.6039603960396039
337	1.0	0.0	1.0	1.0	1.0	0.8853503184713376	0.1146496815286624	0.9477401129943502	0.9267955801104972	0.9371508379888267	0.9360767079504595	0.0639232920495405	0.47378640776699027	0.8327645051194539	0.6039603960396039
337	1.0	0.0	1.0	1.0	1.0	0.8853503184713376	0.1146496815286624	0.9477401129943502	0.9267955801104972	0.9371508379888267	0.9360767079504595	0.0639232920495405	0.47378640776699027	0.8327645051194539	0.6039603960396039
337	1.0	0.0	1.0	1.0	1.0	0.8853503184713376	0.1146496815286624	0.9477401129943502	0.9267955801104972	0.9371508379888267	0.9360767079504595	0.0639232920495405	0.47378640776699027	0.8327645051194539	0.6039603960396039
320	1.0	0.0	1.0	1.0	1.0	0.89568345323741	0.10431654676258995	0.9708222811671088	0.918444165621079	0.9439071566731141	0.9426024241210057	0.0573975758789943	0.48003992015968067	0.9024390243902439	0.6267100977198697
320	1.0	0.0	1.0	1.0	1.0	0.89568345323741	0.10431654676258995	0.9708222811671088	0.918444165621079	0.9439071566731141	0.9426024241210057	0.0573975758789943	0.48003992015968067	0.9024390243902439	0.6267100977198697
320	1.0	0.0	1.0	1.0	1.0	0.89568345323741	0.10431654676258995	0.9708222811671088	0.918444165621079	0.9439071566731141	0.9426024241210057	0.0573975758789943	0.48003992015968067	0.9024390243902439	0.6267100977198697
320	1.0	0.0	1.0	1.0	1.0	0.89568345323741	0.10431654676258995	0.9708222811671088	0.918444165621079	0.9439071566731141	0.9426024241210057	0.0573975758789943	0.48003992015968067	0.9024390243902439	0.6267100977198697
320	1.0	0.0	1.0	1.0	1.0	0.89568345323741	0.10431654676258995	0.9708222811671088	0.918444165621079	0.9439071566731141	0.9426024241210057	0.0573975758789943	0.48003992015968067	0.9024390243902439	0.6267100977198697
320	1.0	0.0	1.0	1.0	1.0	0.89568345323741	0.10431654676258995	0.9708222811671088	0.918444165621079	0.9439071566731141	0.9426024241210057	0.0573975758789943	0.48003992015968067	0.9024390243902439	0.6267100977198697
320	1.0	0.0	1.0	1.0	1.0	0.89568345323741	0.10431654676258995	0.9708222811671088	0.918444165621079	0.9439071566731141	0.9426024241210057	0.0573975758789943	0.48003992015968067	0.9024390243902439	0.6267100977198697
320	1.0	0.0	1.0	1.0	1.0	0.89568345323741	0.10431654676258995	0.9708222811671088	0.918444165621079	0.9439071566731141	0.9426024241210057	0.0573975758789943	0.48003992015968067	0.9024390243902439	0.6267100977198697
320	1.0	0.0	1.0	1.0	1.0	0.89568345323741	0.10431654676258995	0.9708222811671088	0.918444165621079	0.9439071566731141	0.9426024241210057	0.0573975758789943	0.48003992015968067	0.9024390243902439	0.6267100977198697
320	1.0	0.0	1.0	1.0	1.0	0.89568345323741	0.10431654676258995	0.9708222811671088	0.918444165621079	0.9439071566731141	0.9426024241210057	0.0573975758789943	0.48003992015968067	0.9024390243902439	0.6267100977198697
320	1.0	0.0	1.0	1.0	1.0	0.89568345323741	0.10431654676258995	0.9708222811671088	0.918444165621079	0.9439071566731141	0.9426024241210057	0.0573975758789943	0.48003992015968067	0.9024390243902439	0.6267100977198697
320	1.0	0.0	1.0	1.0	1.0	0.89568345323741	0.10431654676258995	0.9708222811671088	0.918444165621079	0.9439071566731141	0.9426024241210057	0.0573975758789943	0.48003992015968067	0.9024390243902439	0.6267100977198697
320	1.0	0.0	1.0	1.0	1.0	0.89568345323741	0.10431654676258995	0.9708222811671088	0.918444165621079	0.9439071566731141	0.9426024241210057	0.0573975758789943	0.48003992015968067	0.9024390243902439	0.6267100977198697
320	1.0	0.0	1.0	1.0	1.0	0.89568345323741	0.10431654676258995	0.9708222811671088	0.918444165621079	0.9439071566731141	0.9426024241210057	0.0573975758789943	0.48003992015968067	0.9024390243902439	0.6267100977198697
328	1.0	0.0	1.0	1.0	1.0	0.8644536652835408	0.13554633471645916	0.9920382165605095	0.8701117318435754	0.9270833333333334	0.9481752546731282	0.05182474532687176	0.5535535535535535	0.8763866877971473	0.678527607361963
328	1.0	0.0	1.0	1.0	1.0	0.8644536652835408	0.13554633471645916	0.9920382165605095	0.8701117318435754	0.9270833333333334	0.9481752546731282	0.05182474532687176	0.5535535535535535	0.8763866877971473	0.678527607361963
328	1.0	0.0	1.0	1.0	1.0	0.8644536652835408	0.13554633471645916	0.9920382165605095	0.8701117318435754	0.9270833333333334	0.9481752546731282	0.05182474532687176	0.5535535535535535	0.8763866877971473	0.678527607361963
328	1.0	0.0	1.0	1.0	1.0	0.8644536652835408	0.13554633471645916	0.9920382165605095	0.8701117318435754	0.9270833333333334	0.9481752546731282	0.05182474532687176	0.5535535535535535	0.8763866877971473	0.678527607361963
336	1.0	0.0	1.0	1.0	1.0	0.8832853025936599	0.1167146974063401	0.9933884297520661	0.8864306784660767	0.9368667186282151	0.9456692913385827	0.054330708661417315	0.5669599217986315	0.841799709724238	0.6775700934579441
336	1.0	0.0	1.0	1.0	1.0	0.8832853025936599	0.1167146974063401	0.9933884297520661	0.8864306784660767	0.9368667186282151	0.9456692913385827	0.054330708661417315	0.5669599217986315	0.841799709724238	0.6775700934579441
336	1.0	0.0	1.0	1.0	1.0	0.8832853025936599	0.1167146974063401	0.9933884297520661	0.8864306784660767	0.9368667186282151	0.9456692913385827	0.054330708661417315	0.5669599217986315	0.841799709724238	0.6775700934579441
339	1.0	0.0	1.0	1.0	1.0	0.821376281112738	0.17862371888726203	1.0	0.8211143695014663	0.9017713365539453	0.9538885065381968	0.04611149346180321	0.6077844311377245	0.8890510948905109	0.7219917012448132
339	1.0	0.0	1.0	1.0	1.0	0.821376281112738	0.17862371888726203	1.0	0.8211143695014663	0.9017713365539453	0.9538885065381968	0.04611149346180321	0.6077844311377245	0.8890510948905109	0.7219917012448132
339	1.0	0.0	1.0	1.0	1.0	0.821376281112738	0.17862371888726203	1.0	0.8211143695014663	0.9017713365539453	0.9538885065381968	0.04611149346180321	0.6077844311377245	0.8890510948905109	0.7219917012448132
339	1.0	0.0	1.0	1.0	1.0	0.821376281112738	0.17862371888726203	1.0	0.8211143695014663	0.9017713365539453	0.9538885065381968	0.04611149346180321	0.6077844311377245	0.8890510948905109	0.7219917012448132
339	1.0	0.0	1.0	1.0	1.0	0.821376281112738	0.17862371888726203	1.0	0.8211143695014663	0.9017713365539453	0.9538885065381968	0.04611149346180321	0.6077844311377245	0.8890510948905109	0.7219917012448132
339	1.0	0.0	1.0	1.0	1.0	0.821376281112738	0.17862371888726203	1.0	0.8211143695014663	0.9017713365539453	0.9538885065381968	0.04611149346180321	0.6077844311377245	0.8890510948905109	0.7219917012448132
339	1.0	0.0	1.0	1.0	1.0	0.821376281112738	0.17862371888726203	1.0	0.8211143695014663	0.9017713365539453	0.9538885065381968	0.04611149346180321	0.6077844311377245	0.8890510948905109	0.7219917012448132
339	1.0	0.0	1.0	1.0	1.0	0.821376281112738	0.17862371888726203	1.0	0.8211143695014663	0.9017713365539453	0.9538885065381968	0.04611149346180321	0.6077844311377245	0.8890510948905109	0.7219917012448132
339	1.0	0.0	1.0	1.0	1.0	0.821376281112738	0.17862371888726203	1.0	0.8211143695014663	0.9017713365539453	0.9538885065381968	0.04611149346180321	0.6077844311377245	0.8890510948905109	0.7219917012448132
339	1.0	0.0	1.0	1.0	1.0	0.821376281112738	0.17862371888726203	1.0	0.8211143695014663	0.9017713365539453	0.9538885065381968	0.04611149346180321	0.6077844311377245	0.8890510948905109	0.7219917012448132
339	1.0	0.0	1.0	1.0	1.0	0.821376281112738	0.17862371888726203	1.0	0.8211143695014663	0.9017713365539453	0.9538885065381968	0.04611149346180321	0.6077844311377245	0.8890510948905109	0.7219917012448132
339	1.0	0.0	1.0	1.0	1.0	0.821376281112738	0.17862371888726203	1.0	0.8211143695014663	0.9017713365539453	0.9538885065381968	0.04611149346180321	0.6077844311377245	0.8890510948905109	0.7219917012448132
339	1.0	0.0	1.0	1.0	1.0	0.821376281112738	0.17862371888726203	1.0	0.8211143695014663	0.9017713365539453	0.9538885065381968	0.04611149346180321	0.6077844311377245	0.8890510948905109	0.7219917012448132
339	1.0	0.0	1.0	1.0	1.0	0.821376281112738	0.17862371888726203	1.0	0.8211143695014663	0.9017713365539453	0.9538885065381968	0.04611149346180321	0.6077844311377245	0.8890510948905109	0.7219917012448132
339	1.0	0.0	1.0	1.0	1.0	0.821376281112738	0.17862371888726203	1.0	0.8211143695014663	0.9017713365539453	0.9538885065381968	0.04611149346180321	0.6077844311377245	0.8890510948905109	0.7219917012448132
339	1.0	0.0	1.0	1.0	1.0	0.821376281112738	0.17862371888726203	1.0	0.8211143695014663	0.9017713365539453	0.9538885065381968	0.04611149346180321	0.6077844311377245	0.8890510948905109	0.7219917012448132
339	1.0	0.0	1.0	1.0	1.0	0.821376281112738	0.17862371888726203	1.0	0.8211143695014663	0.9017713365539453	0.9538885065381968	0.04611149346180321	0.6077844311377245	0.8890510948905109	0.7219917012448132
339	1.0	0.0	1.0	1.0	1.0	0.821376281112738	0.17862371888726203	1.0	0.8211143695014663	0.9017713365539453	0.9538885065381968	0.04611149346180321	0.6077844311377245	0.8890510948905109	0.7219917012448132
351	1.0	0.0	1.0	1.0	1.0	0.8462603878116344	0.15373961218836563	0.9983633387888707	0.8472222222222222	0.9166040570999249	0.9564444444444444	0.04355555555555557	0.6061899679829242	0.8875	0.7203551046290424
351	1.0	0.0	1.0	1.0	1.0	0.8462603878116344	0.15373961218836563	0.9983633387888707	0.8472222222222222	0.9166040570999249	0.9564444444444444	0.04355555555555557	0.6061899679829242	0.8875	0.7203551046290424
351	1.0	0.0	1.0	1.0	1.0	0.8462603878116344	0.15373961218836563	0.9983633387888707	0.8472222222222222	0.9166040570999249	0.9564444444444444	0.04355555555555557	0.6061899679829242	0.8875	0.7203551046290424
351	1.0	0.0	1.0	1.0	1.0	0.8462603878116344	0.15373961218836563	0.9983633387888707	0.8472222222222222	0.9166040570999249	0.9564444444444444	0.04355555555555557	0.6061899679829242	0.8875	0.7203551046290424
351	1.0	0.0	1.0	1.0	1.0	0.8462603878116344	0.15373961218836563	0.9983633387888707	0.8472222222222222	0.9166040570999249	0.9564444444444444	0.04355555555555557	0.6061899679829242	0.8875	0.7203551046290424
351	1.0	0.0	1.0	1.0	1.0	0.8462603878116344	0.15373961218836563	0.9983633387888707	0.8472222222222222	0.9166040570999249	0.9564444444444444	0.04355555555555557	0.6061899679829242	0.8875	0.7203551046290424
351	1.0	0.0	1.0	1.0	1.0	0.8462603878116344	0.15373961218836563	0.9983633387888707	0.8472222222222222	0.9166040570999249	0.9564444444444444	0.04355555555555557	0.6061899679829242	0.8875	0.7203551046290424
351	1.0	0.0	1.0	1.0	1.0	0.8462603878116344	0.15373961218836563	0.9983633387888707	0.8472222222222222	0.9166040570999249	0.9564444444444444	0.04355555555555557	0.6061899679829242	0.8875	0.7203551046290424
351	1.0	0.0	1.0	1.0	1.0	0.8462603878116344	0.15373961218836563	0.9983633387888707	0.8472222222222222	0.9166040570999249	0.9564444444444444	0.04355555555555557	0.6061899679829242	0.8875	0.7203551046290424
351	1.0	0.0	1.0	1.0	1.0	0.8462603878116344	0.15373961218836563	0.9983633387888707	0.8472222222222222	0.9166040570999249	0.9564444444444444	0.04355555555555557	0.6061899679829242	0.8875	0.7203551046290424
351	1.0	0.0	1.0	1.0	1.0	0.8462603878116344	0.15373961218836563	0.9983633387888707	0.8472222222222222	0.9166040570999249	0.9564444444444444	0.04355555555555557	0.6061899679829242	0.8875	0.7203551046290424
351	1.0	0.0	1.0	1.0	1.0	0.8462603878116344	0.15373961218836563	0.9983633387888707	0.8472222222222222	0.9166040570999249	0.9564444444444444	0.04355555555555557	0.6061899679829242	0.8875	0.7203551046290424
351	1.0	0.0	1.0	1.0	1.0	0.8462603878116344	0.15373961218836563	0.9983633387888707	0.8472222222222222	0.9166040570999249	0.9564444444444444	0.04355555555555557	0.6061899679829242	0.8875	0.7203551046290424
351	1.0	0.0	1.0	1.0	1.0	0.8462603878116344	0.15373961218836563	0.9983633387888707	0.8472222222222222	0.9166040570999249	0.9564444444444444	0.04355555555555557	0.6061899679829242	0.8875	0.7203551046290424
351	1.0	0.0	1.0	1.0	1.0	0.8462603878116344	0.15373961218836563	0.9983633387888707	0.8472222222222222	0.9166040570999249	0.9564444444444444	0.04355555555555557	0.6061899679829242	0.8875	0.7203551046290424
351	1.0	0.0	1.0	1.0	1.0	0.8462603878116344	0.15373961218836563	0.9983633387888707	0.8472222222222222	0.9166040570999249	0.9564444444444444	0.04355555555555557	0.6061899679829242	0.8875	0.7203551046290424
351	1.0	0.0	1.0	1.0	1.0	0.8462603878116344	0.15373961218836563	0.9983633387888707	0.8472222222222222	0.9166040570999249	0.9564444444444444	0.04355555555555557	0.6061899679829242	0.8875	0.7203551046290424
351	1.0	0.0	1.0	1.0	1.0	0.8462603878116344	0.15373961218836563	0.9983633387888707	0.8472222222222222	0.9166040570999249	0.9564444444444444	0.04355555555555557	0.6061899679829242	0.8875	0.7203551046290424
351	1.0	0.0	1.0	1.0	1.0	0.8462603878116344	0.15373961218836563	0.9983633387888707	0.8472222222222222	0.9166040570999249	0.9564444444444444	0.04355555555555557	0.6061899679829242	0.8875	0.7203551046290424
351	1.0	0.0	1.0	1.0	1.0	0.8462603878116344	0.15373961218836563	0.9983633387888707	0.8472222222222222	0.9166040570999249	0.9564444444444444	0.04355555555555557	0.6061899679829242	0.8875	0.7203551046290424
328	1.0	0.0	1.0	1.0	1.0	0.8492537313432836	0.15074626865671636	1.0	0.8490284005979073	0.9183508488278092	0.9568931657501963	0.04310683424980366	0.6283448959365708	0.9083094555873925	0.7428236672524897
328	1.0	0.0	1.0	1.0	1.0	0.8492537313432836	0.15074626865671636	1.0	0.8490284005979073	0.9183508488278092	0.9568931657501963	0.04310683424980366	0.6283448959365708	0.9083094555873925	0.7428236672524897
328	1.0	0.0	1.0	1.0	1.0	0.8492537313432836	0.15074626865671636	1.0	0.8490284005979073	0.9183508488278092	0.9568931657501963	0.04310683424980366	0.6283448959365708	0.9083094555873925	0.7428236672524897
328	1.0	0.0	1.0	1.0	1.0	0.8492537313432836	0.15074626865671636	1.0	0.8490284005979073	0.9183508488278092	0.9568931657501963	0.04310683424980366	0.6283448959365708	0.9083094555873925	0.7428236672524897
328	1.0	0.0	1.0	1.0	1.0	0.8492537313432836	0.15074626865671636	1.0	0.8490284005979073	0.9183508488278092	0.9568931657501963	0.04310683424980366	0.6283448959365708	0.9083094555873925	0.7428236672524897
328	1.0	0.0	1.0	1.0	1.0	0.8492537313432836	0.15074626865671636	1.0	0.8490284005979073	0.9183508488278092	0.9568931657501963	0.04310683424980366	0.6283448959365708	0.9083094555873925	0.7428236672524897
328	1.0	0.0	1.0	1.0	1.0	0.8492537313432836	0.15074626865671636	1.0	0.8490284005979073	0.9183508488278092	0.9568931657501963	0.04310683424980366	0.6283448959365708	0.9083094555873925	0.7428236672524897
328	1.0	0.0	1.0	1.0	1.0	0.8492537313432836	0.15074626865671636	1.0	0.8490284005979073	0.9183508488278092	0.9568931657501963	0.04310683424980366	0.6283448959365708	0.9083094555873925	0.7428236672524897
328	1.0	0.0	1.0	1.0	1.0	0.8492537313432836	0.15074626865671636	1.0	0.8490284005979073	0.9183508488278092	0.9568931657501963	0.04310683424980366	0.6283448959365708	0.9083094555873925	0.7428236672524897
328	1.0	0.0	1.0	1.0	1.0	0.8492537313432836	0.15074626865671636	1.0	0.8490284005979073	0.9183508488278092	0.9568931657501963	0.04310683424980366	0.6283448959365708	0.9083094555873925	0.7428236672524897
