# Supplementary material for: An Improved Hybrid Feature Selection Algorithm for Electric Charge Recovery Risk
Source: Hindawi journal article supplement (doi:10.1155/2020/8479341), 2020-08-28
Supplement: f1 [file 8479341.f1.zip › 8479341.f1/Experimental Results/201807/BABC_SBS_results.csv]

features_num	Accuracy_high	Loss_high	Precission_high	Recall_high	F1_high	Accuracy_med	Loss_med	Precission_med	Recall_med	F1_med	Accuracy_low	Loss_low	Precission_low	Recall_low	F1_low
328	1	0	1	1	1	0.858208955	0.141791045	1	0.85799701	0.923572003	0.956696779	0.043303221	0.626850938	0.90974212	0.742255991
328	1	0	1	1	1	0.858208955	0.141791045	1	0.85799701	0.923572003	0.956696779	0.043303221	0.626850938	0.90974212	0.742255991
327	1	0	1	1	1	0.859910581	0.140089419	1	0.859701493	0.924558587	0.956692527	0.043307473	0.626482213	0.909612626	0.741954359
326	1	0	1	1	1	0.859701493	0.140298507	1	0.859491779	0.924437299	0.956696779	0.043303221	0.626850938	0.90974212	0.742255991
326	1	0	1	1	1	0.859701493	0.140298507	1	0.859491779	0.924437299	0.956696779	0.043303221	0.626850938	0.90974212	0.742255991
326	1	0	1	1	1	0.859701493	0.140298507	1	0.859491779	0.924437299	0.956696779	0.043303221	0.626850938	0.90974212	0.742255991
326	1	0	1	1	1	0.859701493	0.140298507	1	0.859491779	0.924437299	0.956696779	0.043303221	0.626850938	0.90974212	0.742255991
325	1	0	1	1	1	0.861400894	0.138599106	1	0.86119403	0.92542101	0.956692527	0.043307473	0.626482213	0.909612626	0.741954359
325	1	0	1	1	1	0.861400894	0.138599106	1	0.86119403	0.92542101	0.956692527	0.043307473	0.626482213	0.909612626	0.741954359
325	1	0	1	1	1	0.861400894	0.138599106	1	0.86119403	0.92542101	0.956692527	0.043307473	0.626482213	0.909612626	0.741954359
325	1	0	1	1	1	0.861400894	0.138599106	1	0.86119403	0.92542101	0.956692527	0.043307473	0.626482213	0.909612626	0.741954359
324	1	0	1	1	1	0.861400894	0.138599106	1	0.86119403	0.92542101	0.956692527	0.043307473	0.626482213	0.909612626	0.741954359
324	1	0	1	1	1	0.861400894	0.138599106	1	0.86119403	0.92542101	0.956692527	0.043307473	0.626482213	0.909612626	0.741954359
324	1	0	1	1	1	0.861400894	0.138599106	1	0.86119403	0.92542101	0.956692527	0.043307473	0.626482213	0.909612626	0.741954359
324	1	0	1	1	1	0.861400894	0.138599106	1	0.86119403	0.92542101	0.956692527	0.043307473	0.626482213	0.909612626	0.741954359
324	1	0	1	1	1	0.861400894	0.138599106	1	0.86119403	0.92542101	0.956692527	0.043307473	0.626482213	0.909612626	0.741954359
323	1	0	1	1	1	0.861400894	0.138599106	1	0.86119403	0.92542101	0.956692527	0.043307473	0.626482213	0.909612626	0.741954359
323	1	0	1	1	1	0.861400894	0.138599106	1	0.86119403	0.92542101	0.956692527	0.043307473	0.626482213	0.909612626	0.741954359
323	1	0	1	1	1	0.861400894	0.138599106	1	0.86119403	0.92542101	0.956692527	0.043307473	0.626482213	0.909612626	0.741954359
323	1	0	1	1	1	0.861400894	0.138599106	1	0.86119403	0.92542101	0.956692527	0.043307473	0.626482213	0.909612626	0.741954359
323	1	0	1	1	1	0.861400894	0.138599106	1	0.86119403	0.92542101	0.956692527	0.043307473	0.626482213	0.909612626	0.741954359
322	1	0	1	1	1	0.861400894	0.138599106	1	0.86119403	0.92542101	0.956692527	0.043307473	0.626482213	0.909612626	0.741954359
322	1	0	1	1	1	0.861400894	0.138599106	1	0.86119403	0.92542101	0.956692527	0.043307473	0.626482213	0.909612626	0.741954359
322	1	0	1	1	1	0.861400894	0.138599106	1	0.86119403	0.92542101	0.956692527	0.043307473	0.626482213	0.909612626	0.741954359
322	1	0	1	1	1	0.861400894	0.138599106	1	0.86119403	0.92542101	0.956692527	0.043307473	0.626482213	0.909612626	0.741954359
322	1	0	1	1	1	0.861400894	0.138599106	1	0.86119403	0.92542101	0.956692527	0.043307473	0.626482213	0.909612626	0.741954359
322	1	0	1	1	1	0.861400894	0.138599106	1	0.86119403	0.92542101	0.956692527	0.043307473	0.626482213	0.909612626	0.741954359
322	1	0	1	1	1	0.861400894	0.138599106	1	0.86119403	0.92542101	0.956692527	0.043307473	0.626482213	0.909612626	0.741954359
322	1	0	1	1	1	0.861400894	0.138599106	1	0.86119403	0.92542101	0.956692527	0.043307473	0.626482213	0.909612626	0.741954359
322	1	0	1	1	1	0.861400894	0.138599106	1	0.86119403	0.92542101	0.956692527	0.043307473	0.626482213	0.909612626	0.741954359
322	1	0	1	1	1	0.861400894	0.138599106	1	0.86119403	0.92542101	0.956692527	0.043307473	0.626482213	0.909612626	0.741954359
322	1	0	1	1	1	0.861400894	0.138599106	1	0.86119403	0.92542101	0.956692527	0.043307473	0.626482213	0.909612626	0.741954359
322	1	0	1	1	1	0.861400894	0.138599106	1	0.86119403	0.92542101	0.956692527	0.043307473	0.626482213	0.909612626	0.741954359
322	1	0	1	1	1	0.861400894	0.138599106	1	0.86119403	0.92542101	0.956692527	0.043307473	0.626482213	0.909612626	0.741954359
322	1	0	1	1	1	0.861400894	0.138599106	1	0.86119403	0.92542101	0.956692527	0.043307473	0.626482213	0.909612626	0.741954359
322	1	0	1	1	1	0.861400894	0.138599106	1	0.86119403	0.92542101	0.956692527	0.043307473	0.626482213	0.909612626	0.741954359
321	1	0	1	1	1	0.861400894	0.138599106	1	0.86119403	0.92542101	0.956692527	0.043307473	0.626482213	0.909612626	0.741954359
321	1	0	1	1	1	0.861400894	0.138599106	1	0.86119403	0.92542101	0.956692527	0.043307473	0.626482213	0.909612626	0.741954359
321	1	0	1	1	1	0.861400894	0.138599106	1	0.86119403	0.92542101	0.956692527	0.043307473	0.626482213	0.909612626	0.741954359
320	1	0	1	1	1	0.861400894	0.138599106	1	0.86119403	0.92542101	0.956692527	0.043307473	0.626482213	0.909612626	0.741954359
320	1	0	1	1	1	0.861400894	0.138599106	1	0.86119403	0.92542101	0.956692527	0.043307473	0.626482213	0.909612626	0.741954359
320	1	0	1	1	1	0.861400894	0.138599106	1	0.86119403	0.92542101	0.956692527	0.043307473	0.626482213	0.909612626	0.741954359
320	1	0	1	1	1	0.861400894	0.138599106	1	0.86119403	0.92542101	0.956692527	0.043307473	0.626482213	0.909612626	0.741954359
320	1	0	1	1	1	0.861400894	0.138599106	1	0.86119403	0.92542101	0.956692527	0.043307473	0.626482213	0.909612626	0.741954359
320	1	0	1	1	1	0.861400894	0.138599106	1	0.86119403	0.92542101	0.956692527	0.043307473	0.626482213	0.909612626	0.741954359
320	1	0	1	1	1	0.861400894	0.138599106	1	0.86119403	0.92542101	0.956692527	0.043307473	0.626482213	0.909612626	0.741954359
320	1	0	1	1	1	0.861400894	0.138599106	1	0.86119403	0.92542101	0.956692527	0.043307473	0.626482213	0.909612626	0.741954359
320	1	0	1	1	1	0.861400894	0.138599106	1	0.86119403	0.92542101	0.956692527	0.043307473	0.626482213	0.909612626	0.741954359
320	1	0	1	1	1	0.861400894	0.138599106	1	0.86119403	0.92542101	0.956692527	0.043307473	0.626482213	0.909612626	0.741954359
320	1	0	1	1	1	0.861400894	0.138599106	1	0.86119403	0.92542101	0.956692527	0.043307473	0.626482213	0.909612626	0.741954359
320	1	0	1	1	1	0.861400894	0.138599106	1	0.86119403	0.92542101	0.956692527	0.043307473	0.626482213	0.909612626	0.741954359
320	1	0	1	1	1	0.861400894	0.138599106	1	0.86119403	0.92542101	0.956692527	0.043307473	0.626482213	0.909612626	0.741954359
320	1	0	1	1	1	0.861400894	0.138599106	1	0.86119403	0.92542101	0.956692527	0.043307473	0.626482213	0.909612626	0.741954359
320	1	0	1	1	1	0.861400894	0.138599106	1	0.86119403	0.92542101	0.956692527	0.043307473	0.626482213	0.909612626	0.741954359
320	1	0	1	1	1	0.861400894	0.138599106	1	0.86119403	0.92542101	0.956692527	0.043307473	0.626482213	0.909612626	0.741954359
320	1	0	1	1	1	0.861400894	0.138599106	1	0.86119403	0.92542101	0.956692527	0.043307473	0.626482213	0.909612626	0.741954359
320	1	0	1	1	1	0.861400894	0.138599106	1	0.86119403	0.92542101	0.956692527	0.043307473	0.626482213	0.909612626	0.741954359
319	1	0	1	1	1	0.861400894	0.138599106	1	0.86119403	0.92542101	0.956692527	0.043307473	0.626482213	0.909612626	0.741954359
319	1	0	1	1	1	0.861400894	0.138599106	1	0.86119403	0.92542101	0.956692527	0.043307473	0.626482213	0.909612626	0.741954359
319	1	0	1	1	1	0.861400894	0.138599106	1	0.86119403	0.92542101	0.956692527	0.043307473	0.626482213	0.909612626	0.741954359
319	1	0	1	1	1	0.861400894	0.138599106	1	0.86119403	0.92542101	0.956692527	0.043307473	0.626482213	0.909612626	0.741954359
319	1	0	1	1	1	0.861400894	0.138599106	1	0.86119403	0.92542101	0.956692527	0.043307473	0.626482213	0.909612626	0.741954359
319	1	0	1	1	1	0.861400894	0.138599106	1	0.86119403	0.92542101	0.956692527	0.043307473	0.626482213	0.909612626	0.741954359
319	1	0	1	1	1	0.861400894	0.138599106	1	0.86119403	0.92542101	0.956692527	0.043307473	0.626482213	0.909612626	0.741954359
318	1	0	1	1	1	0.861400894	0.138599106	1	0.86119403	0.92542101	0.956692527	0.043307473	0.626482213	0.909612626	0.741954359
318	1	0	1	1	1	0.861400894	0.138599106	1	0.86119403	0.92542101	0.956692527	0.043307473	0.626482213	0.909612626	0.741954359
318	1	0	1	1	1	0.861400894	0.138599106	1	0.86119403	0.92542101	0.956692527	0.043307473	0.626482213	0.909612626	0.741954359
317	1	0	1	1	1	0.861400894	0.138599106	1	0.86119403	0.92542101	0.956692527	0.043307473	0.626482213	0.909612626	0.741954359
317	1	0	1	1	1	0.861400894	0.138599106	1	0.86119403	0.92542101	0.956692527	0.043307473	0.626482213	0.909612626	0.741954359
317	1	0	1	1	1	0.861400894	0.138599106	1	0.86119403	0.92542101	0.956692527	0.043307473	0.626482213	0.909612626	0.741954359
317	1	0	1	1	1	0.861400894	0.138599106	1	0.86119403	0.92542101	0.956692527	0.043307473	0.626482213	0.909612626	0.741954359
317	1	0	1	1	1	0.861400894	0.138599106	1	0.86119403	0.92542101	0.956692527	0.043307473	0.626482213	0.909612626	0.741954359
317	1	0	1	1	1	0.861400894	0.138599106	1	0.86119403	0.92542101	0.956692527	0.043307473	0.626482213	0.909612626	0.741954359
317	1	0	1	1	1	0.861400894	0.138599106	1	0.86119403	0.92542101	0.956692527	0.043307473	0.626482213	0.909612626	0.741954359
317	1	0	1	1	1	0.861400894	0.138599106	1	0.86119403	0.92542101	0.956692527	0.043307473	0.626482213	0.909612626	0.741954359
317	1	0	1	1	1	0.861400894	0.138599106	1	0.86119403	0.92542101	0.956692527	0.043307473	0.626482213	0.909612626	0.741954359
317	1	0	1	1	1	0.861400894	0.138599106	1	0.86119403	0.92542101	0.956692527	0.043307473	0.626482213	0.909612626	0.741954359
317	1	0	1	1	1	0.861400894	0.138599106	1	0.86119403	0.92542101	0.956692527	0.043307473	0.626482213	0.909612626	0.741954359
316	1	0	1	1	1	0.861400894	0.138599106	1	0.86119403	0.92542101	0.956692527	0.043307473	0.626482213	0.909612626	0.741954359
316	1	0	1	1	1	0.861400894	0.138599106	1	0.86119403	0.92542101	0.956692527	0.043307473	0.626482213	0.909612626	0.741954359
316	1	0	1	1	1	0.861400894	0.138599106	1	0.86119403	0.92542101	0.956692527	0.043307473	0.626482213	0.909612626	0.741954359
316	1	0	1	1	1	0.861400894	0.138599106	1	0.86119403	0.92542101	0.956692527	0.043307473	0.626482213	0.909612626	0.741954359
316	1	0	1	1	1	0.861400894	0.138599106	1	0.86119403	0.92542101	0.956692527	0.043307473	0.626482213	0.909612626	0.741954359
316	1	0	1	1	1	0.861400894	0.138599106	1	0.86119403	0.92542101	0.956692527	0.043307473	0.626482213	0.909612626	0.741954359
315	1	0	1	1	1	0.861400894	0.138599106	1	0.86119403	0.92542101	0.956692527	0.043307473	0.626482213	0.909612626	0.741954359
315	1	0	1	1	1	0.861400894	0.138599106	1	0.86119403	0.92542101	0.956692527	0.043307473	0.626482213	0.909612626	0.741954359
315	1	0	1	1	1	0.861400894	0.138599106	1	0.86119403	0.92542101	0.956692527	0.043307473	0.626482213	0.909612626	0.741954359
315	1	0	1	1	1	0.861400894	0.138599106	1	0.86119403	0.92542101	0.956692527	0.043307473	0.626482213	0.909612626	0.741954359
315	1	0	1	1	1	0.861400894	0.138599106	1	0.86119403	0.92542101	0.956692527	0.043307473	0.626482213	0.909612626	0.741954359
315	1	0	1	1	1	0.861400894	0.138599106	1	0.86119403	0.92542101	0.956692527	0.043307473	0.626482213	0.909612626	0.741954359
315	1	0	1	1	1	0.861400894	0.138599106	1	0.86119403	0.92542101	0.956692527	0.043307473	0.626482213	0.909612626	0.741954359
314	1	0	1	1	1	0.861400894	0.138599106	1	0.86119403	0.92542101	0.956692527	0.043307473	0.626482213	0.909612626	0.741954359
314	1	0	1	1	1	0.861400894	0.138599106	1	0.86119403	0.92542101	0.956692527	0.043307473	0.626482213	0.909612626	0.741954359
314	1	0	1	1	1	0.861400894	0.138599106	1	0.86119403	0.92542101	0.956692527	0.043307473	0.626482213	0.909612626	0.741954359
314	1	0	1	1	1	0.861400894	0.138599106	1	0.86119403	0.92542101	0.956692527	0.043307473	0.626482213	0.909612626	0.741954359
314	1	0	1	1	1	0.861400894	0.138599106	1	0.86119403	0.92542101	0.956692527	0.043307473	0.626482213	0.909612626	0.741954359
314	1	0	1	1	1	0.861400894	0.138599106	1	0.86119403	0.92542101	0.956692527	0.043307473	0.626482213	0.909612626	0.741954359
314	1	0	1	1	1	0.861400894	0.138599106	1	0.86119403	0.92542101	0.956692527	0.043307473	0.626482213	0.909612626	0.741954359
314	1	0	1	1	1	0.861400894	0.138599106	1	0.86119403	0.92542101	0.956692527	0.043307473	0.626482213	0.909612626	0.741954359
313	1	0	1	1	1	0.861400894	0.138599106	1	0.86119403	0.92542101	0.956692527	0.043307473	0.626482213	0.909612626	0.741954359
312	1	0	1	1	1	0.861400894	0.138599106	1	0.86119403	0.92542101	0.956692527	0.043307473	0.626482213	0.909612626	0.741954359
312	1	0	1	1	1	0.861400894	0.138599106	1	0.86119403	0.92542101	0.956692527	0.043307473	0.626482213	0.909612626	0.741954359
312	1	0	1	1	1	0.861400894	0.138599106	1	0.86119403	0.92542101	0.956692527	0.043307473	0.626482213	0.909612626	0.741954359
311	1	0	1	1	1	0.861400894	0.138599106	1	0.86119403	0.92542101	0.956692527	0.043307473	0.626482213	0.909612626	0.741954359
311	1	0	1	1	1	0.861400894	0.138599106	1	0.86119403	0.92542101	0.956692527	0.043307473	0.626482213	0.909612626	0.741954359
311	1	0	1	1	1	0.861400894	0.138599106	1	0.86119403	0.92542101	0.956692527	0.043307473	0.626482213	0.909612626	0.741954359
311	1	0	1	1	1	0.861400894	0.138599106	1	0.86119403	0.92542101	0.956692527	0.043307473	0.626482213	0.909612626	0.741954359
311	1	0	1	1	1	0.861400894	0.138599106	1	0.86119403	0.92542101	0.956692527	0.043307473	0.626482213	0.909612626	0.741954359
311	1	0	1	1	1	0.861400894	0.138599106	1	0.86119403	0.92542101	0.956692527	0.043307473	0.626482213	0.909612626	0.741954359
311	1	0	1	1	1	0.861400894	0.138599106	1	0.86119403	0.92542101	0.956692527	0.043307473	0.626482213	0.909612626	0.741954359
311	1	0	1	1	1	0.861400894	0.138599106	1	0.86119403	0.92542101	0.956692527	0.043307473	0.626482213	0.909612626	0.741954359
311	1	0	1	1	1	0.861400894	0.138599106	1	0.86119403	0.92542101	0.956692527	0.043307473	0.626482213	0.909612626	0.741954359
311	1	0	1	1	1	0.861400894	0.138599106	1	0.86119403	0.92542101	0.956692527	0.043307473	0.626482213	0.909612626	0.741954359
311	1	0	1	1	1	0.861400894	0.138599106	1	0.86119403	0.92542101	0.956692527	0.043307473	0.626482213	0.909612626	0.741954359
311	1	0	1	1	1	0.861400894	0.138599106	1	0.86119403	0.92542101	0.956692527	0.043307473	0.626482213	0.909612626	0.741954359
311	1	0	1	1	1	0.861400894	0.138599106	1	0.86119403	0.92542101	0.956692527	0.043307473	0.626482213	0.909612626	0.741954359
311	1	0	1	1	1	0.861400894	0.138599106	1	0.86119403	0.92542101	0.956692527	0.043307473	0.626482213	0.909612626	0.741954359
311	1	0	1	1	1	0.861400894	0.138599106	1	0.86119403	0.92542101	0.956692527	0.043307473	0.626482213	0.909612626	0.741954359
311	1	0	1	1	1	0.861400894	0.138599106	1	0.86119403	0.92542101	0.956692527	0.043307473	0.626482213	0.909612626	0.741954359
311	1	0	1	1	1	0.861400894	0.138599106	1	0.86119403	0.92542101	0.956692527	0.043307473	0.626482213	0.909612626	0.741954359
311	1	0	1	1	1	0.861400894	0.138599106	1	0.86119403	0.92542101	0.956692527	0.043307473	0.626482213	0.909612626	0.741954359
310	1	0	1	1	1	0.861400894	0.138599106	1	0.86119403	0.92542101	0.956692527	0.043307473	0.626482213	0.909612626	0.741954359
310	1	0	1	1	1	0.861400894	0.138599106	1	0.86119403	0.92542101	0.956692527	0.043307473	0.626482213	0.909612626	0.741954359
310	1	0	1	1	1	0.861400894	0.138599106	1	0.86119403	0.92542101	0.956692527	0.043307473	0.626482213	0.909612626	0.741954359
310	1	0	1	1	1	0.861400894	0.138599106	1	0.86119403	0.92542101	0.956692527	0.043307473	0.626482213	0.909612626	0.741954359
310	1	0	1	1	1	0.861400894	0.138599106	1	0.86119403	0.92542101	0.956692527	0.043307473	0.626482213	0.909612626	0.741954359
310	1	0	1	1	1	0.861400894	0.138599106	1	0.86119403	0.92542101	0.956692527	0.043307473	0.626482213	0.909612626	0.741954359
310	1	0	1	1	1	0.861400894	0.138599106	1	0.86119403	0.92542101	0.956692527	0.043307473	0.626482213	0.909612626	0.741954359
310	1	0	1	1	1	0.861400894	0.138599106	1	0.86119403	0.92542101	0.956692527	0.043307473	0.626482213	0.909612626	0.741954359
310	1	0	1	1	1	0.861400894	0.138599106	1	0.86119403	0.92542101	0.956692527	0.043307473	0.626482213	0.909612626	0.741954359
310	1	0	1	1	1	0.861400894	0.138599106	1	0.86119403	0.92542101	0.956692527	0.043307473	0.626482213	0.909612626	0.741954359
310	1	0	1	1	1	0.861400894	0.138599106	1	0.86119403	0.92542101	0.956692527	0.043307473	0.626482213	0.909612626	0.741954359
310	1	0	1	1	1	0.861400894	0.138599106	1	0.86119403	0.92542101	0.956692527	0.043307473	0.626482213	0.909612626	0.741954359
310	1	0	1	1	1	0.861400894	0.138599106	1	0.86119403	0.92542101	0.956692527	0.043307473	0.626482213	0.909612626	0.741954359
310	1	0	1	1	1	0.861400894	0.138599106	1	0.86119403	0.92542101	0.956692527	0.043307473	0.626482213	0.909612626	0.741954359
310	1	0	1	1	1	0.861400894	0.138599106	1	0.86119403	0.92542101	0.956692527	0.043307473	0.626482213	0.909612626	0.741954359
310	1	0	1	1	1	0.861400894	0.138599106	1	0.86119403	0.92542101	0.956692527	0.043307473	0.626482213	0.909612626	0.741954359
310	1	0	1	1	1	0.861400894	0.138599106	1	0.86119403	0.92542101	0.956692527	0.043307473	0.626482213	0.909612626	0.741954359
310	1	0	1	1	1	0.861400894	0.138599106	1	0.86119403	0.92542101	0.956692527	0.043307473	0.626482213	0.909612626	0.741954359
310	1	0	1	1	1	0.861400894	0.138599106	1	0.86119403	0.92542101	0.956692527	0.043307473	0.626482213	0.909612626	0.741954359
310	1	0	1	1	1	0.861400894	0.138599106	1	0.86119403	0.92542101	0.956692527	0.043307473	0.626482213	0.909612626	0.741954359
310	1	0	1	1	1	0.861400894	0.138599106	1	0.86119403	0.92542101	0.956692527	0.043307473	0.626482213	0.909612626	0.741954359
310	1	0	1	1	1	0.861400894	0.138599106	1	0.86119403	0.92542101	0.956692527	0.043307473	0.626482213	0.909612626	0.741954359
310	1	0	1	1	1	0.861400894	0.138599106	1	0.86119403	0.92542101	0.956692527	0.043307473	0.626482213	0.909612626	0.741954359
310	1	0	1	1	1	0.861400894	0.138599106	1	0.86119403	0.92542101	0.956692527	0.043307473	0.626482213	0.909612626	0.741954359
310	1	0	1	1	1	0.861400894	0.138599106	1	0.86119403	0.92542101	0.956692527	0.043307473	0.626482213	0.909612626	0.741954359
310	1	0	1	1	1	0.861400894	0.138599106	1	0.86119403	0.92542101	0.956692527	0.043307473	0.626482213	0.909612626	0.741954359
310	1	0	1	1	1	0.861400894	0.138599106	1	0.86119403	0.92542101	0.956692527	0.043307473	0.626482213	0.909612626	0.741954359
309	1	0	1	1	1	0.861400894	0.138599106	1	0.86119403	0.92542101	0.956692527	0.043307473	0.626482213	0.909612626	0.741954359
309	1	0	1	1	1	0.861400894	0.138599106	1	0.86119403	0.92542101	0.956692527	0.043307473	0.626482213	0.909612626	0.741954359
309	1	0	1	1	1	0.861400894	0.138599106	1	0.86119403	0.92542101	0.956692527	0.043307473	0.626482213	0.909612626	0.741954359
309	1	0	1	1	1	0.861400894	0.138599106	1	0.86119403	0.92542101	0.956692527	0.043307473	0.626482213	0.909612626	0.741954359
309	1	0	1	1	1	0.861400894	0.138599106	1	0.86119403	0.92542101	0.956692527	0.043307473	0.626482213	0.909612626	0.741954359
309	1	0	1	1	1	0.861400894	0.138599106	1	0.86119403	0.92542101	0.956692527	0.043307473	0.626482213	0.909612626	0.741954359
309	1	0	1	1	1	0.861400894	0.138599106	1	0.86119403	0.92542101	0.956692527	0.043307473	0.626482213	0.909612626	0.741954359
309	1	0	1	1	1	0.861400894	0.138599106	1	0.86119403	0.92542101	0.956692527	0.043307473	0.626482213	0.909612626	0.741954359
308	1	0	1	1	1	0.860986547	0.139013453	1	0.860778443	0.925181014	0.956701031	0.043298969	0.627218935	0.909871245	0.742556918
308	1	0	1	1	1	0.860986547	0.139013453	1	0.860778443	0.925181014	0.956701031	0.043298969	0.627218935	0.909871245	0.742556918
308	1	0	1	1	1	0.860986547	0.139013453	1	0.860778443	0.925181014	0.956701031	0.043298969	0.627218935	0.909871245	0.742556918
308	1	0	1	1	1	0.860986547	0.139013453	1	0.860778443	0.925181014	0.956701031	0.043298969	0.627218935	0.909871245	0.742556918
308	1	0	1	1	1	0.860986547	0.139013453	1	0.860778443	0.925181014	0.956701031	0.043298969	0.627218935	0.909871245	0.742556918
308	1	0	1	1	1	0.860986547	0.139013453	1	0.860778443	0.925181014	0.956701031	0.043298969	0.627218935	0.909871245	0.742556918
308	1	0	1	1	1	0.860986547	0.139013453	1	0.860778443	0.925181014	0.956701031	0.043298969	0.627218935	0.909871245	0.742556918
308	1	0	1	1	1	0.860986547	0.139013453	1	0.860778443	0.925181014	0.956701031	0.043298969	0.627218935	0.909871245	0.742556918
308	1	0	1	1	1	0.860986547	0.139013453	1	0.860778443	0.925181014	0.956701031	0.043298969	0.627218935	0.909871245	0.742556918
308	1	0	1	1	1	0.860986547	0.139013453	1	0.860778443	0.925181014	0.956701031	0.043298969	0.627218935	0.909871245	0.742556918
308	1	0	1	1	1	0.860986547	0.139013453	1	0.860778443	0.925181014	0.956701031	0.043298969	0.627218935	0.909871245	0.742556918
308	1	0	1	1	1	0.860986547	0.139013453	1	0.860778443	0.925181014	0.956701031	0.043298969	0.627218935	0.909871245	0.742556918
308	1	0	1	1	1	0.860986547	0.139013453	1	0.860778443	0.925181014	0.956701031	0.043298969	0.627218935	0.909871245	0.742556918
308	1	0	1	1	1	0.860986547	0.139013453	1	0.860778443	0.925181014	0.956701031	0.043298969	0.627218935	0.909871245	0.742556918
308	1	0	1	1	1	0.860986547	0.139013453	1	0.860778443	0.925181014	0.956701031	0.043298969	0.627218935	0.909871245	0.742556918
308	1	0	1	1	1	0.860986547	0.139013453	1	0.860778443	0.925181014	0.956701031	0.043298969	0.627218935	0.909871245	0.742556918
308	1	0	1	1	1	0.860986547	0.139013453	1	0.860778443	0.925181014	0.956701031	0.043298969	0.627218935	0.909871245	0.742556918
308	1	0	1	1	1	0.860986547	0.139013453	1	0.860778443	0.925181014	0.956701031	0.043298969	0.627218935	0.909871245	0.742556918
308	1	0	1	1	1	0.860986547	0.139013453	1	0.860778443	0.925181014	0.956701031	0.043298969	0.627218935	0.909871245	0.742556918
308	1	0	1	1	1	0.860986547	0.139013453	1	0.860778443	0.925181014	0.956701031	0.043298969	0.627218935	0.909871245	0.742556918
308	1	0	1	1	1	0.860986547	0.139013453	1	0.860778443	0.925181014	0.956701031	0.043298969	0.627218935	0.909871245	0.742556918
308	1	0	1	1	1	0.860986547	0.139013453	1	0.860778443	0.925181014	0.956701031	0.043298969	0.627218935	0.909871245	0.742556918
308	1	0	1	1	1	0.860986547	0.139013453	1	0.860778443	0.925181014	0.956701031	0.043298969	0.627218935	0.909871245	0.742556918
308	1	0	1	1	1	0.860986547	0.139013453	1	0.860778443	0.925181014	0.956701031	0.043298969	0.627218935	0.909871245	0.742556918
308	1	0	1	1	1	0.860986547	0.139013453	1	0.860778443	0.925181014	0.956701031	0.043298969	0.627218935	0.909871245	0.742556918
308	1	0	1	1	1	0.860986547	0.139013453	1	0.860778443	0.925181014	0.956701031	0.043298969	0.627218935	0.909871245	0.742556918
308	1	0	1	1	1	0.860986547	0.139013453	1	0.860778443	0.925181014	0.956701031	0.043298969	0.627218935	0.909871245	0.742556918
308	1	0	1	1	1	0.860986547	0.139013453	1	0.860778443	0.925181014	0.956701031	0.043298969	0.627218935	0.909871245	0.742556918
308	1	0	1	1	1	0.860986547	0.139013453	1	0.860778443	0.925181014	0.956701031	0.043298969	0.627218935	0.909871245	0.742556918
308	1	0	1	1	1	0.860986547	0.139013453	1	0.860778443	0.925181014	0.956701031	0.043298969	0.627218935	0.909871245	0.742556918
308	1	0	1	1	1	0.860986547	0.139013453	1	0.860778443	0.925181014	0.956701031	0.043298969	0.627218935	0.909871245	0.742556918
308	1	0	1	1	1	0.860986547	0.139013453	1	0.860778443	0.925181014	0.956701031	0.043298969	0.627218935	0.909871245	0.742556918
308	1	0	1	1	1	0.860986547	0.139013453	1	0.860778443	0.925181014	0.956701031	0.043298969	0.627218935	0.909871245	0.742556918
308	1	0	1	1	1	0.860986547	0.139013453	1	0.860778443	0.925181014	0.956701031	0.043298969	0.627218935	0.909871245	0.742556918
308	1	0	1	1	1	0.860986547	0.139013453	1	0.860778443	0.925181014	0.956701031	0.043298969	0.627218935	0.909871245	0.742556918
308	1	0	1	1	1	0.860986547	0.139013453	1	0.860778443	0.925181014	0.956701031	0.043298969	0.627218935	0.909871245	0.742556918
308	1	0	1	1	1	0.860986547	0.139013453	1	0.860778443	0.925181014	0.956701031	0.043298969	0.627218935	0.909871245	0.742556918
308	1	0	1	1	1	0.860986547	0.139013453	1	0.860778443	0.925181014	0.956701031	0.043298969	0.627218935	0.909871245	0.742556918
308	1	0	1	1	1	0.860986547	0.139013453	1	0.860778443	0.925181014	0.956701031	0.043298969	0.627218935	0.909871245	0.742556918
308	1	0	1	1	1	0.860986547	0.139013453	1	0.860778443	0.925181014	0.956701031	0.043298969	0.627218935	0.909871245	0.742556918
308	1	0	1	1	1	0.860986547	0.139013453	1	0.860778443	0.925181014	0.956701031	0.043298969	0.627218935	0.909871245	0.742556918
308	1	0	1	1	1	0.860986547	0.139013453	1	0.860778443	0.925181014	0.956701031	0.043298969	0.627218935	0.909871245	0.742556918
308	1	0	1	1	1	0.860986547	0.139013453	1	0.860778443	0.925181014	0.956701031	0.043298969	0.627218935	0.909871245	0.742556918
308	1	0	1	1	1	0.860986547	0.139013453	1	0.860778443	0.925181014	0.956701031	0.043298969	0.627218935	0.909871245	0.742556918
308	1	0	1	1	1	0.860986547	0.139013453	1	0.860778443	0.925181014	0.956701031	0.043298969	0.627218935	0.909871245	0.742556918
308	1	0	1	1	1	0.860986547	0.139013453	1	0.860778443	0.925181014	0.956701031	0.043298969	0.627218935	0.909871245	0.742556918
308	1	0	1	1	1	0.860986547	0.139013453	1	0.860778443	0.925181014	0.956701031	0.043298969	0.627218935	0.909871245	0.742556918
308	1	0	1	1	1	0.860986547	0.139013453	1	0.860778443	0.925181014	0.956701031	0.043298969	0.627218935	0.909871245	0.742556918
308	1	0	1	1	1	0.860986547	0.139013453	1	0.860778443	0.925181014	0.956701031	0.043298969	0.627218935	0.909871245	0.742556918
308	1	0	1	1	1	0.860986547	0.139013453	1	0.860778443	0.925181014	0.956701031	0.043298969	0.627218935	0.909871245	0.742556918
308	1	0	1	1	1	0.860986547	0.139013453	1	0.860778443	0.925181014	0.956701031	0.043298969	0.627218935	0.909871245	0.742556918
308	1	0	1	1	1	0.860986547	0.139013453	1	0.860778443	0.925181014	0.956701031	0.043298969	0.627218935	0.909871245	0.742556918
308	1	0	1	1	1	0.860986547	0.139013453	1	0.860778443	0.925181014	0.956701031	0.043298969	0.627218935	0.909871245	0.742556918
308	1	0	1	1	1	0.860986547	0.139013453	1	0.860778443	0.925181014	0.956701031	0.043298969	0.627218935	0.909871245	0.742556918
308	1	0	1	1	1	0.860986547	0.139013453	1	0.860778443	0.925181014	0.956701031	0.043298969	0.627218935	0.909871245	0.742556918
308	1	0	1	1	1	0.860986547	0.139013453	1	0.860778443	0.925181014	0.956701031	0.043298969	0.627218935	0.909871245	0.742556918
308	1	0	1	1	1	0.860986547	0.139013453	1	0.860778443	0.925181014	0.956701031	0.043298969	0.627218935	0.909871245	0.742556918
308	1	0	1	1	1	0.860986547	0.139013453	1	0.860778443	0.925181014	0.956701031	0.043298969	0.627218935	0.909871245	0.742556918
308	1	0	1	1	1	0.860986547	0.139013453	1	0.860778443	0.925181014	0.956701031	0.043298969	0.627218935	0.909871245	0.742556918
308	1	0	1	1	1	0.860986547	0.139013453	1	0.860778443	0.925181014	0.956701031	0.043298969	0.627218935	0.909871245	0.742556918
308	1	0	1	1	1	0.860986547	0.139013453	1	0.860778443	0.925181014	0.956701031	0.043298969	0.627218935	0.909871245	0.742556918
308	1	0	1	1	1	0.860986547	0.139013453	1	0.860778443	0.925181014	0.956701031	0.043298969	0.627218935	0.909871245	0.742556918
308	1	0	1	1	1	0.860986547	0.139013453	1	0.860778443	0.925181014	0.956701031	0.043298969	0.627218935	0.909871245	0.742556918
308	1	0	1	1	1	0.860986547	0.139013453	1	0.860778443	0.925181014	0.956701031	0.043298969	0.627218935	0.909871245	0.742556918
308	1	0	1	1	1	0.860986547	0.139013453	1	0.860778443	0.925181014	0.956701031	0.043298969	0.627218935	0.909871245	0.742556918
308	1	0	1	1	1	0.860986547	0.139013453	1	0.860778443	0.925181014	0.956701031	0.043298969	0.627218935	0.909871245	0.742556918
307	1	0	1	1	1	0.860986547	0.139013453	1	0.860778443	0.925181014	0.956701031	0.043298969	0.627218935	0.909871245	0.742556918
307	1	0	1	1	1	0.860986547	0.139013453	1	0.860778443	0.925181014	0.956701031	0.043298969	0.627218935	0.909871245	0.742556918
307	1	0	1	1	1	0.860986547	0.139013453	1	0.860778443	0.925181014	0.956701031	0.043298969	0.627218935	0.909871245	0.742556918
306	1	0	1	1	1	0.860986547	0.139013453	1	0.860778443	0.925181014	0.956701031	0.043298969	0.627218935	0.909871245	0.742556918
306	1	0	1	1	1	0.860986547	0.139013453	1	0.860778443	0.925181014	0.956701031	0.043298969	0.627218935	0.909871245	0.742556918
306	1	0	1	1	1	0.860986547	0.139013453	1	0.860778443	0.925181014	0.956701031	0.043298969	0.627218935	0.909871245	0.742556918
306	1	0	1	1	1	0.860986547	0.139013453	1	0.860778443	0.925181014	0.956701031	0.043298969	0.627218935	0.909871245	0.742556918
306	1	0	1	1	1	0.860986547	0.139013453	1	0.860778443	0.925181014	0.956701031	0.043298969	0.627218935	0.909871245	0.742556918
306	1	0	1	1	1	0.860986547	0.139013453	1	0.860778443	0.925181014	0.956701031	0.043298969	0.627218935	0.909871245	0.742556918
306	1	0	1	1	1	0.860986547	0.139013453	1	0.860778443	0.925181014	0.956701031	0.043298969	0.627218935	0.909871245	0.742556918
306	1	0	1	1	1	0.860986547	0.139013453	1	0.860778443	0.925181014	0.956701031	0.043298969	0.627218935	0.909871245	0.742556918
306	1	0	1	1	1	0.860986547	0.139013453	1	0.860778443	0.925181014	0.956701031	0.043298969	0.627218935	0.909871245	0.742556918
306	1	0	1	1	1	0.860986547	0.139013453	1	0.860778443	0.925181014	0.956701031	0.043298969	0.627218935	0.909871245	0.742556918
306	1	0	1	1	1	0.860986547	0.139013453	1	0.860778443	0.925181014	0.956701031	0.043298969	0.627218935	0.909871245	0.742556918
305	1	0	1	1	1	0.850678733	0.149321267	1	0.850678733	0.919315403	0.957904033	0.042095967	0.637088734	0.907670455	0.748681898
305	1	0	1	1	1	0.850678733	0.149321267	1	0.850678733	0.919315403	0.957904033	0.042095967	0.637088734	0.907670455	0.748681898
305	1	0	1	1	1	0.850678733	0.149321267	1	0.850678733	0.919315403	0.957904033	0.042095967	0.637088734	0.907670455	0.748681898
305	1	0	1	1	1	0.850678733	0.149321267	1	0.850678733	0.919315403	0.957904033	0.042095967	0.637088734	0.907670455	0.748681898
304	1	0	1	1	1	0.853030303	0.146969697	1	0.853030303	0.920686836	0.958505003	0.041494997	0.642	0.908062235	0.752196837
304	1	0	1	1	1	0.853030303	0.146969697	1	0.853030303	0.920686836	0.958505003	0.041494997	0.642	0.908062235	0.752196837
303	1	0	1	1	1	0.852807284	0.147192716	1	0.852807284	0.920556921	0.958509073	0.041490927	0.642357642	0.90819209	0.752486834
302	1	0	1	1	1	0.852807284	0.147192716	1	0.852807284	0.920556921	0.95860716	0.04139284	0.643	0.90819209	0.7529274
302	1	0	1	1	1	0.852807284	0.147192716	1	0.852807284	0.920556921	0.95860716	0.04139284	0.643	0.90819209	0.7529274
301	1	0	1	1	1	0.852807284	0.147192716	1	0.852807284	0.920556921	0.95860716	0.04139284	0.643	0.90819209	0.7529274
301	1	0	1	1	1	0.852807284	0.147192716	1	0.852807284	0.920556921	0.95860716	0.04139284	0.643	0.90819209	0.7529274
300	1	0	1	1	1	0.812714777	0.187285223	1	0.812714777	0.896682464	0.970015576	0.029984424	0.753453773	0.903184713	0.821552723
299	1	0	1	1	1	0.818181818	0.181818182	1	0.818181818	0.9	0.970012657	0.029987343	0.752653928	0.904336735	0.821552723
299	1	0	1	1	1	0.818181818	0.181818182	1	0.818181818	0.9	0.970012657	0.029987343	0.752653928	0.904336735	0.821552723
299	1	0	1	1	1	0.818181818	0.181818182	1	0.818181818	0.9	0.970012657	0.029987343	0.752653928	0.904336735	0.821552723
299	1	0	1	1	1	0.818181818	0.181818182	1	0.818181818	0.9	0.970012657	0.029987343	0.752653928	0.904336735	0.821552723
299	1	0	1	1	1	0.818181818	0.181818182	1	0.818181818	0.9	0.970012657	0.029987343	0.752653928	0.904336735	0.821552723
299	1	0	1	1	1	0.818181818	0.181818182	1	0.818181818	0.9	0.970012657	0.029987343	0.752653928	0.904336735	0.821552723
299	1	0	1	1	1	0.818181818	0.181818182	1	0.818181818	0.9	0.970012657	0.029987343	0.752653928	0.904336735	0.821552723
299	1	0	1	1	1	0.818181818	0.181818182	1	0.818181818	0.9	0.970012657	0.029987343	0.752653928	0.904336735	0.821552723
299	1	0	1	1	1	0.818181818	0.181818182	1	0.818181818	0.9	0.970012657	0.029987343	0.752653928	0.904336735	0.821552723
299	1	0	1	1	1	0.818181818	0.181818182	1	0.818181818	0.9	0.970012657	0.029987343	0.752653928	0.904336735	0.821552723
299	1	0	1	1	1	0.818181818	0.181818182	1	0.818181818	0.9	0.970012657	0.029987343	0.752653928	0.904336735	0.821552723
299	1	0	1	1	1	0.818181818	0.181818182	1	0.818181818	0.9	0.970012657	0.029987343	0.752653928	0.904336735	0.821552723
299	1	0	1	1	1	0.818181818	0.181818182	1	0.818181818	0.9	0.970012657	0.029987343	0.752653928	0.904336735	0.821552723
299	1	0	1	1	1	0.818181818	0.181818182	1	0.818181818	0.9	0.970012657	0.029987343	0.752653928	0.904336735	0.821552723
299	1	0	1	1	1	0.818181818	0.181818182	1	0.818181818	0.9	0.970012657	0.029987343	0.752653928	0.904336735	0.821552723
299	1	0	1	1	1	0.818181818	0.181818182	1	0.818181818	0.9	0.970012657	0.029987343	0.752653928	0.904336735	0.821552723
299	1	0	1	1	1	0.818181818	0.181818182	1	0.818181818	0.9	0.970012657	0.029987343	0.752653928	0.904336735	0.821552723
299	1	0	1	1	1	0.818181818	0.181818182	1	0.818181818	0.9	0.970012657	0.029987343	0.752653928	0.904336735	0.821552723
299	1	0	1	1	1	0.818181818	0.181818182	1	0.818181818	0.9	0.970012657	0.029987343	0.752653928	0.904336735	0.821552723
299	1	0	1	1	1	0.818181818	0.181818182	1	0.818181818	0.9	0.970012657	0.029987343	0.752653928	0.904336735	0.821552723
299	1	0	1	1	1	0.818181818	0.181818182	1	0.818181818	0.9	0.970012657	0.029987343	0.752653928	0.904336735	0.821552723
299	1	0	1	1	1	0.818181818	0.181818182	1	0.818181818	0.9	0.970012657	0.029987343	0.752653928	0.904336735	0.821552723
299	1	0	1	1	1	0.818181818	0.181818182	1	0.818181818	0.9	0.970012657	0.029987343	0.752653928	0.904336735	0.821552723
299	1	0	1	1	1	0.818181818	0.181818182	1	0.818181818	0.9	0.970012657	0.029987343	0.752653928	0.904336735	0.821552723
299	1	0	1	1	1	0.818181818	0.181818182	1	0.818181818	0.9	0.970012657	0.029987343	0.752653928	0.904336735	0.821552723
298	1	0	1	1	1	0.818181818	0.181818182	1	0.818181818	0.9	0.970012657	0.029987343	0.752653928	0.904336735	0.821552723
297	1	0	1	1	1	0.818493151	0.181506849	1	0.818493151	0.900188324	0.97030185	0.02969815	0.753715499	0.906768838	0.823188406
297	1	0	1	1	1	0.818493151	0.181506849	1	0.818493151	0.900188324	0.97030185	0.02969815	0.753715499	0.906768838	0.823188406
297	1	0	1	1	1	0.818493151	0.181506849	1	0.818493151	0.900188324	0.97030185	0.02969815	0.753715499	0.906768838	0.823188406
297	1	0	1	1	1	0.818493151	0.181506849	1	0.818493151	0.900188324	0.97030185	0.02969815	0.753715499	0.906768838	0.823188406
297	1	0	1	1	1	0.818493151	0.181506849	1	0.818493151	0.900188324	0.97030185	0.02969815	0.753715499	0.906768838	0.823188406
297	1	0	1	1	1	0.818493151	0.181506849	1	0.818493151	0.900188324	0.97030185	0.02969815	0.753715499	0.906768838	0.823188406
297	1	0	1	1	1	0.818493151	0.181506849	1	0.818493151	0.900188324	0.97030185	0.02969815	0.753715499	0.906768838	0.823188406
297	1	0	1	1	1	0.818493151	0.181506849	1	0.818493151	0.900188324	0.97030185	0.02969815	0.753715499	0.906768838	0.823188406
297	1	0	1	1	1	0.818493151	0.181506849	1	0.818493151	0.900188324	0.97030185	0.02969815	0.753715499	0.906768838	0.823188406
297	1	0	1	1	1	0.818493151	0.181506849	1	0.818493151	0.900188324	0.97030185	0.02969815	0.753715499	0.906768838	0.823188406
297	1	0	1	1	1	0.818493151	0.181506849	1	0.818493151	0.900188324	0.97030185	0.02969815	0.753715499	0.906768838	0.823188406
297	1	0	1	1	1	0.818493151	0.181506849	1	0.818493151	0.900188324	0.97030185	0.02969815	0.753715499	0.906768838	0.823188406
297	1	0	1	1	1	0.818493151	0.181506849	1	0.818493151	0.900188324	0.97030185	0.02969815	0.753715499	0.906768838	0.823188406
297	1	0	1	1	1	0.818493151	0.181506849	1	0.818493151	0.900188324	0.97030185	0.02969815	0.753715499	0.906768838	0.823188406
297	1	0	1	1	1	0.818493151	0.181506849	1	0.818493151	0.900188324	0.97030185	0.02969815	0.753715499	0.906768838	0.823188406
297	1	0	1	1	1	0.818493151	0.181506849	1	0.818493151	0.900188324	0.97030185	0.02969815	0.753715499	0.906768838	0.823188406
297	1	0	1	1	1	0.818493151	0.181506849	1	0.818493151	0.900188324	0.97030185	0.02969815	0.753715499	0.906768838	0.823188406
297	1	0	1	1	1	0.818493151	0.181506849	1	0.818493151	0.900188324	0.97030185	0.02969815	0.753715499	0.906768838	0.823188406
297	1	0	1	1	1	0.818493151	0.181506849	1	0.818493151	0.900188324	0.97030185	0.02969815	0.753715499	0.906768838	0.823188406
297	1	0	1	1	1	0.818493151	0.181506849	1	0.818493151	0.900188324	0.97030185	0.02969815	0.753715499	0.906768838	0.823188406
297	1	0	1	1	1	0.818493151	0.181506849	1	0.818493151	0.900188324	0.97030185	0.02969815	0.753715499	0.906768838	0.823188406
297	1	0	1	1	1	0.818493151	0.181506849	1	0.818493151	0.900188324	0.97030185	0.02969815	0.753715499	0.906768838	0.823188406
297	1	0	1	1	1	0.818493151	0.181506849	1	0.818493151	0.900188324	0.97030185	0.02969815	0.753715499	0.906768838	0.823188406
297	1	0	1	1	1	0.818493151	0.181506849	1	0.818493151	0.900188324	0.97030185	0.02969815	0.753715499	0.906768838	0.823188406
297	1	0	1	1	1	0.818493151	0.181506849	1	0.818493151	0.900188324	0.97030185	0.02969815	0.753715499	0.906768838	0.823188406
297	1	0	1	1	1	0.818493151	0.181506849	1	0.818493151	0.900188324	0.97030185	0.02969815	0.753715499	0.906768838	0.823188406
297	1	0	1	1	1	0.818493151	0.181506849	1	0.818493151	0.900188324	0.97030185	0.02969815	0.753715499	0.906768838	0.823188406
297	1	0	1	1	1	0.818493151	0.181506849	1	0.818493151	0.900188324	0.97030185	0.02969815	0.753715499	0.906768838	0.823188406
297	1	0	1	1	1	0.818493151	0.181506849	1	0.818493151	0.900188324	0.97030185	0.02969815	0.753715499	0.906768838	0.823188406
297	1	0	1	1	1	0.818493151	0.181506849	1	0.818493151	0.900188324	0.97030185	0.02969815	0.753715499	0.906768838	0.823188406
297	1	0	1	1	1	0.818493151	0.181506849	1	0.818493151	0.900188324	0.97030185	0.02969815	0.753715499	0.906768838	0.823188406
297	1	0	1	1	1	0.818493151	0.181506849	1	0.818493151	0.900188324	0.97030185	0.02969815	0.753715499	0.906768838	0.823188406
297	1	0	1	1	1	0.818493151	0.181506849	1	0.818493151	0.900188324	0.97030185	0.02969815	0.753715499	0.906768838	0.823188406
297	1	0	1	1	1	0.818493151	0.181506849	1	0.818493151	0.900188324	0.97030185	0.02969815	0.753715499	0.906768838	0.823188406
297	1	0	1	1	1	0.818493151	0.181506849	1	0.818493151	0.900188324	0.97030185	0.02969815	0.753715499	0.906768838	0.823188406
297	1	0	1	1	1	0.818493151	0.181506849	1	0.818493151	0.900188324	0.97030185	0.02969815	0.753715499	0.906768838	0.823188406
297	1	0	1	1	1	0.818493151	0.181506849	1	0.818493151	0.900188324	0.97030185	0.02969815	0.753715499	0.906768838	0.823188406
297	1	0	1	1	1	0.818493151	0.181506849	1	0.818493151	0.900188324	0.97030185	0.02969815	0.753715499	0.906768838	0.823188406
297	1	0	1	1	1	0.818493151	0.181506849	1	0.818493151	0.900188324	0.97030185	0.02969815	0.753715499	0.906768838	0.823188406
297	1	0	1	1	1	0.818493151	0.181506849	1	0.818493151	0.900188324	0.97030185	0.02969815	0.753715499	0.906768838	0.823188406
297	1	0	1	1	1	0.818493151	0.181506849	1	0.818493151	0.900188324	0.97030185	0.02969815	0.753715499	0.906768838	0.823188406
297	1	0	1	1	1	0.818493151	0.181506849	1	0.818493151	0.900188324	0.97030185	0.02969815	0.753715499	0.906768838	0.823188406
297	1	0	1	1	1	0.818493151	0.181506849	1	0.818493151	0.900188324	0.97030185	0.02969815	0.753715499	0.906768838	0.823188406
297	1	0	1	1	1	0.818493151	0.181506849	1	0.818493151	0.900188324	0.97030185	0.02969815	0.753715499	0.906768838	0.823188406
297	1	0	1	1	1	0.818493151	0.181506849	1	0.818493151	0.900188324	0.97030185	0.02969815	0.753715499	0.906768838	0.823188406
297	1	0	1	1	1	0.818493151	0.181506849	1	0.818493151	0.900188324	0.97030185	0.02969815	0.753715499	0.906768838	0.823188406
297	1	0	1	1	1	0.818493151	0.181506849	1	0.818493151	0.900188324	0.97030185	0.02969815	0.753715499	0.906768838	0.823188406
297	1	0	1	1	1	0.818493151	0.181506849	1	0.818493151	0.900188324	0.97030185	0.02969815	0.753715499	0.906768838	0.823188406
297	1	0	1	1	1	0.818493151	0.181506849	1	0.818493151	0.900188324	0.97030185	0.02969815	0.753715499	0.906768838	0.823188406
297	1	0	1	1	1	0.818493151	0.181506849	1	0.818493151	0.900188324	0.97030185	0.02969815	0.753715499	0.906768838	0.823188406
297	1	0	1	1	1	0.818493151	0.181506849	1	0.818493151	0.900188324	0.97030185	0.02969815	0.753715499	0.906768838	0.823188406
297	1	0	1	1	1	0.818493151	0.181506849	1	0.818493151	0.900188324	0.97030185	0.02969815	0.753715499	0.906768838	0.823188406
297	1	0	1	1	1	0.818493151	0.181506849	1	0.818493151	0.900188324	0.97030185	0.02969815	0.753715499	0.906768838	0.823188406
297	1	0	1	1	1	0.818493151	0.181506849	1	0.818493151	0.900188324	0.97030185	0.02969815	0.753715499	0.906768838	0.823188406
297	1	0	1	1	1	0.818493151	0.181506849	1	0.818493151	0.900188324	0.97030185	0.02969815	0.753715499	0.906768838	0.823188406
297	1	0	1	1	1	0.818493151	0.181506849	1	0.818493151	0.900188324	0.97030185	0.02969815	0.753715499	0.906768838	0.823188406
297	1	0	1	1	1	0.818493151	0.181506849	1	0.818493151	0.900188324	0.97030185	0.02969815	0.753715499	0.906768838	0.823188406
297	1	0	1	1	1	0.818493151	0.181506849	1	0.818493151	0.900188324	0.97030185	0.02969815	0.753715499	0.906768838	0.823188406
297	1	0	1	1	1	0.818493151	0.181506849	1	0.818493151	0.900188324	0.97030185	0.02969815	0.753715499	0.906768838	0.823188406
297	1	0	1	1	1	0.818493151	0.181506849	1	0.818493151	0.900188324	0.97030185	0.02969815	0.753715499	0.906768838	0.823188406
297	1	0	1	1	1	0.818493151	0.181506849	1	0.818493151	0.900188324	0.97030185	0.02969815	0.753715499	0.906768838	0.823188406
297	1	0	1	1	1	0.818493151	0.181506849	1	0.818493151	0.900188324	0.97030185	0.02969815	0.753715499	0.906768838	0.823188406
297	1	0	1	1	1	0.818493151	0.181506849	1	0.818493151	0.900188324	0.97030185	0.02969815	0.753715499	0.906768838	0.823188406
297	1	0	1	1	1	0.818493151	0.181506849	1	0.818493151	0.900188324	0.97030185	0.02969815	0.753715499	0.906768838	0.823188406
297	1	0	1	1	1	0.818493151	0.181506849	1	0.818493151	0.900188324	0.97030185	0.02969815	0.753715499	0.906768838	0.823188406
297	1	0	1	1	1	0.818493151	0.181506849	1	0.818493151	0.900188324	0.97030185	0.02969815	0.753715499	0.906768838	0.823188406
297	1	0	1	1	1	0.818493151	0.181506849	1	0.818493151	0.900188324	0.97030185	0.02969815	0.753715499	0.906768838	0.823188406
297	1	0	1	1	1	0.818493151	0.181506849	1	0.818493151	0.900188324	0.97030185	0.02969815	0.753715499	0.906768838	0.823188406
297	1	0	1	1	1	0.818493151	0.181506849	1	0.818493151	0.900188324	0.97030185	0.02969815	0.753715499	0.906768838	0.823188406
297	1	0	1	1	1	0.818493151	0.181506849	1	0.818493151	0.900188324	0.97030185	0.02969815	0.753715499	0.906768838	0.823188406
297	1	0	1	1	1	0.818493151	0.181506849	1	0.818493151	0.900188324	0.97030185	0.02969815	0.753715499	0.906768838	0.823188406
297	1	0	1	1	1	0.818493151	0.181506849	1	0.818493151	0.900188324	0.97030185	0.02969815	0.753715499	0.906768838	0.823188406
297	1	0	1	1	1	0.818493151	0.181506849	1	0.818493151	0.900188324	0.97030185	0.02969815	0.753715499	0.906768838	0.823188406
297	1	0	1	1	1	0.818493151	0.181506849	1	0.818493151	0.900188324	0.97030185	0.02969815	0.753715499	0.906768838	0.823188406
297	1	0	1	1	1	0.818493151	0.181506849	1	0.818493151	0.900188324	0.97030185	0.02969815	0.753715499	0.906768838	0.823188406
297	1	0	1	1	1	0.818493151	0.181506849	1	0.818493151	0.900188324	0.97030185	0.02969815	0.753715499	0.906768838	0.823188406
297	1	0	1	1	1	0.818493151	0.181506849	1	0.818493151	0.900188324	0.97030185	0.02969815	0.753715499	0.906768838	0.823188406
297	1	0	1	1	1	0.818493151	0.181506849	1	0.818493151	0.900188324	0.97030185	0.02969815	0.753715499	0.906768838	0.823188406
297	1	0	1	1	1	0.818493151	0.181506849	1	0.818493151	0.900188324	0.97030185	0.02969815	0.753715499	0.906768838	0.823188406
297	1	0	1	1	1	0.818493151	0.181506849	1	0.818493151	0.900188324	0.97030185	0.02969815	0.753715499	0.906768838	0.823188406
297	1	0	1	1	1	0.818493151	0.181506849	1	0.818493151	0.900188324	0.97030185	0.02969815	0.753715499	0.906768838	0.823188406
297	1	0	1	1	1	0.818493151	0.181506849	1	0.818493151	0.900188324	0.97030185	0.02969815	0.753715499	0.906768838	0.823188406
297	1	0	1	1	1	0.818493151	0.181506849	1	0.818493151	0.900188324	0.97030185	0.02969815	0.753715499	0.906768838	0.823188406
297	1	0	1	1	1	0.818493151	0.181506849	1	0.818493151	0.900188324	0.97030185	0.02969815	0.753715499	0.906768838	0.823188406
297	1	0	1	1	1	0.818493151	0.181506849	1	0.818493151	0.900188324	0.97030185	0.02969815	0.753715499	0.906768838	0.823188406
297	1	0	1	1	1	0.818493151	0.181506849	1	0.818493151	0.900188324	0.97030185	0.02969815	0.753715499	0.906768838	0.823188406
297	1	0	1	1	1	0.818493151	0.181506849	1	0.818493151	0.900188324	0.97030185	0.02969815	0.753715499	0.906768838	0.823188406
297	1	0	1	1	1	0.818493151	0.181506849	1	0.818493151	0.900188324	0.97030185	0.02969815	0.753715499	0.906768838	0.823188406
297	1	0	1	1	1	0.818493151	0.181506849	1	0.818493151	0.900188324	0.97030185	0.02969815	0.753715499	0.906768838	0.823188406
297	1	0	1	1	1	0.818493151	0.181506849	1	0.818493151	0.900188324	0.97030185	0.02969815	0.753715499	0.906768838	0.823188406
297	1	0	1	1	1	0.818493151	0.181506849	1	0.818493151	0.900188324	0.97030185	0.02969815	0.753715499	0.906768838	0.823188406
297	1	0	1	1	1	0.818493151	0.181506849	1	0.818493151	0.900188324	0.97030185	0.02969815	0.753715499	0.906768838	0.823188406
297	1	0	1	1	1	0.818493151	0.181506849	1	0.818493151	0.900188324	0.97030185	0.02969815	0.753715499	0.906768838	0.823188406
297	1	0	1	1	1	0.818493151	0.181506849	1	0.818493151	0.900188324	0.97030185	0.02969815	0.753715499	0.906768838	0.823188406
297	1	0	1	1	1	0.818493151	0.181506849	1	0.818493151	0.900188324	0.97030185	0.02969815	0.753715499	0.906768838	0.823188406
297	1	0	1	1	1	0.818493151	0.181506849	1	0.818493151	0.900188324	0.97030185	0.02969815	0.753715499	0.906768838	0.823188406
297	1	0	1	1	1	0.818493151	0.181506849	1	0.818493151	0.900188324	0.97030185	0.02969815	0.753715499	0.906768838	0.823188406
297	1	0	1	1	1	0.818493151	0.181506849	1	0.818493151	0.900188324	0.97030185	0.02969815	0.753715499	0.906768838	0.823188406
297	1	0	1	1	1	0.818493151	0.181506849	1	0.818493151	0.900188324	0.97030185	0.02969815	0.753715499	0.906768838	0.823188406
297	1	0	1	1	1	0.818493151	0.181506849	1	0.818493151	0.900188324	0.97030185	0.02969815	0.753715499	0.906768838	0.823188406
297	1	0	1	1	1	0.818493151	0.181506849	1	0.818493151	0.900188324	0.97030185	0.02969815	0.753715499	0.906768838	0.823188406
297	1	0	1	1	1	0.818493151	0.181506849	1	0.818493151	0.900188324	0.97030185	0.02969815	0.753715499	0.906768838	0.823188406
297	1	0	1	1	1	0.818493151	0.181506849	1	0.818493151	0.900188324	0.97030185	0.02969815	0.753715499	0.906768838	0.823188406
297	1	0	1	1	1	0.818493151	0.181506849	1	0.818493151	0.900188324	0.97030185	0.02969815	0.753715499	0.906768838	0.823188406
297	1	0	1	1	1	0.818493151	0.181506849	1	0.818493151	0.900188324	0.97030185	0.02969815	0.753715499	0.906768838	0.823188406
297	1	0	1	1	1	0.818493151	0.181506849	1	0.818493151	0.900188324	0.97030185	0.02969815	0.753715499	0.906768838	0.823188406
297	1	0	1	1	1	0.818493151	0.181506849	1	0.818493151	0.900188324	0.97030185	0.02969815	0.753715499	0.906768838	0.823188406
297	1	0	1	1	1	0.818493151	0.181506849	1	0.818493151	0.900188324	0.97030185	0.02969815	0.753715499	0.906768838	0.823188406
297	1	0	1	1	1	0.818493151	0.181506849	1	0.818493151	0.900188324	0.97030185	0.02969815	0.753715499	0.906768838	0.823188406
297	1	0	1	1	1	0.818493151	0.181506849	1	0.818493151	0.900188324	0.97030185	0.02969815	0.753715499	0.906768838	0.823188406
297	1	0	1	1	1	0.818493151	0.181506849	1	0.818493151	0.900188324	0.97030185	0.02969815	0.753715499	0.906768838	0.823188406
297	1	0	1	1	1	0.818493151	0.181506849	1	0.818493151	0.900188324	0.97030185	0.02969815	0.753715499	0.906768838	0.823188406
297	1	0	1	1	1	0.818493151	0.181506849	1	0.818493151	0.900188324	0.97030185	0.02969815	0.753715499	0.906768838	0.823188406
297	1	0	1	1	1	0.818493151	0.181506849	1	0.818493151	0.900188324	0.97030185	0.02969815	0.753715499	0.906768838	0.823188406
297	1	0	1	1	1	0.818493151	0.181506849	1	0.818493151	0.900188324	0.97030185	0.02969815	0.753715499	0.906768838	0.823188406
297	1	0	1	1	1	0.818493151	0.181506849	1	0.818493151	0.900188324	0.97030185	0.02969815	0.753715499	0.906768838	0.823188406
297	1	0	1	1	1	0.818493151	0.181506849	1	0.818493151	0.900188324	0.97030185	0.02969815	0.753715499	0.906768838	0.823188406
297	1	0	1	1	1	0.818493151	0.181506849	1	0.818493151	0.900188324	0.97030185	0.02969815	0.753715499	0.906768838	0.823188406
297	1	0	1	1	1	0.818493151	0.181506849	1	0.818493151	0.900188324	0.97030185	0.02969815	0.753715499	0.906768838	0.823188406
297	1	0	1	1	1	0.818493151	0.181506849	1	0.818493151	0.900188324	0.97030185	0.02969815	0.753715499	0.906768838	0.823188406
297	1	0	1	1	1	0.818493151	0.181506849	1	0.818493151	0.900188324	0.97030185	0.02969815	0.753715499	0.906768838	0.823188406
297	1	0	1	1	1	0.818493151	0.181506849	1	0.818493151	0.900188324	0.97030185	0.02969815	0.753715499	0.906768838	0.823188406
297	1	0	1	1	1	0.818493151	0.181506849	1	0.818493151	0.900188324	0.97030185	0.02969815	0.753715499	0.906768838	0.823188406
297	1	0	1	1	1	0.818493151	0.181506849	1	0.818493151	0.900188324	0.97030185	0.02969815	0.753715499	0.906768838	0.823188406
297	1	0	1	1	1	0.818493151	0.181506849	1	0.818493151	0.900188324	0.97030185	0.02969815	0.753715499	0.906768838	0.823188406
297	1	0	1	1	1	0.818493151	0.181506849	1	0.818493151	0.900188324	0.97030185	0.02969815	0.753715499	0.906768838	0.823188406
297	1	0	1	1	1	0.818493151	0.181506849	1	0.818493151	0.900188324	0.97030185	0.02969815	0.753715499	0.906768838	0.823188406
297	1	0	1	1	1	0.818493151	0.181506849	1	0.818493151	0.900188324	0.97030185	0.02969815	0.753715499	0.906768838	0.823188406
297	1	0	1	1	1	0.818493151	0.181506849	1	0.818493151	0.900188324	0.97030185	0.02969815	0.753715499	0.906768838	0.823188406
297	1	0	1	1	1	0.818493151	0.181506849	1	0.818493151	0.900188324	0.97030185	0.02969815	0.753715499	0.906768838	0.823188406
297	1	0	1	1	1	0.818493151	0.181506849	1	0.818493151	0.900188324	0.97030185	0.02969815	0.753715499	0.906768838	0.823188406
297	1	0	1	1	1	0.818493151	0.181506849	1	0.818493151	0.900188324	0.97030185	0.02969815	0.753715499	0.906768838	0.823188406
297	1	0	1	1	1	0.818493151	0.181506849	1	0.818493151	0.900188324	0.97030185	0.02969815	0.753715499	0.906768838	0.823188406
297	1	0	1	1	1	0.818493151	0.181506849	1	0.818493151	0.900188324	0.97030185	0.02969815	0.753715499	0.906768838	0.823188406
297	1	0	1	1	1	0.818493151	0.181506849	1	0.818493151	0.900188324	0.97030185	0.02969815	0.753715499	0.906768838	0.823188406
297	1	0	1	1	1	0.818493151	0.181506849	1	0.818493151	0.900188324	0.97030185	0.02969815	0.753715499	0.906768838	0.823188406
297	1	0	1	1	1	0.818493151	0.181506849	1	0.818493151	0.900188324	0.97030185	0.02969815	0.753715499	0.906768838	0.823188406
297	1	0	1	1	1	0.818493151	0.181506849	1	0.818493151	0.900188324	0.97030185	0.02969815	0.753715499	0.906768838	0.823188406
297	1	0	1	1	1	0.818493151	0.181506849	1	0.818493151	0.900188324	0.97030185	0.02969815	0.753715499	0.906768838	0.823188406
297	1	0	1	1	1	0.818493151	0.181506849	1	0.818493151	0.900188324	0.97030185	0.02969815	0.753715499	0.906768838	0.823188406
297	1	0	1	1	1	0.818493151	0.181506849	1	0.818493151	0.900188324	0.97030185	0.02969815	0.753715499	0.906768838	0.823188406
297	1	0	1	1	1	0.818493151	0.181506849	1	0.818493151	0.900188324	0.97030185	0.02969815	0.753715499	0.906768838	0.823188406
297	1	0	1	1	1	0.818493151	0.181506849	1	0.818493151	0.900188324	0.97030185	0.02969815	0.753715499	0.906768838	0.823188406
297	1	0	1	1	1	0.818493151	0.181506849	1	0.818493151	0.900188324	0.97030185	0.02969815	0.753715499	0.906768838	0.823188406
297	1	0	1	1	1	0.818493151	0.181506849	1	0.818493151	0.900188324	0.97030185	0.02969815	0.753715499	0.906768838	0.823188406
297	1	0	1	1	1	0.818493151	0.181506849	1	0.818493151	0.900188324	0.97030185	0.02969815	0.753715499	0.906768838	0.823188406
297	1	0	1	1	1	0.818493151	0.181506849	1	0.818493151	0.900188324	0.97030185	0.02969815	0.753715499	0.906768838	0.823188406
297	1	0	1	1	1	0.818493151	0.181506849	1	0.818493151	0.900188324	0.97030185	0.02969815	0.753715499	0.906768838	0.823188406
297	1	0	1	1	1	0.818493151	0.181506849	1	0.818493151	0.900188324	0.97030185	0.02969815	0.753715499	0.906768838	0.823188406
297	1	0	1	1	1	0.818493151	0.181506849	1	0.818493151	0.900188324	0.97030185	0.02969815	0.753715499	0.906768838	0.823188406
297	1	0	1	1	1	0.818493151	0.181506849	1	0.818493151	0.900188324	0.97030185	0.02969815	0.753715499	0.906768838	0.823188406
297	1	0	1	1	1	0.818493151	0.181506849	1	0.818493151	0.900188324	0.97030185	0.02969815	0.753715499	0.906768838	0.823188406
297	1	0	1	1	1	0.818493151	0.181506849	1	0.818493151	0.900188324	0.97030185	0.02969815	0.753715499	0.906768838	0.823188406
297	1	0	1	1	1	0.818493151	0.181506849	1	0.818493151	0.900188324	0.97030185	0.02969815	0.753715499	0.906768838	0.823188406
297	1	0	1	1	1	0.818493151	0.181506849	1	0.818493151	0.900188324	0.97030185	0.02969815	0.753715499	0.906768838	0.823188406
297	1	0	1	1	1	0.818493151	0.181506849	1	0.818493151	0.900188324	0.97030185	0.02969815	0.753715499	0.906768838	0.823188406
