# Supplementary material for: An Improved Hybrid Feature Selection Algorithm for Electric Charge Recovery Risk
Source: Hindawi journal article supplement (doi:10.1155/2020/8479341), 2020-08-28
Supplement: f1 [file 8479341.f1.zip › 8479341.f1/Experimental Results/201807/BGA_results.csv]

features_num	Accuracy_high	Loss_high	Precission_high	Recall_high	F1_high	Accuracy_med	Loss_med	Precission_med	Recall_med	F1_med	Accuracy_low	Loss_low	Precission_low	Recall_low	F1_low
371	1.0	0.0	1.0	1.0	1.0	0.7633744855967078	0.23662551440329216	0.9222797927461139	0.8072562358276644	0.860943168077388	0.9054054054054054	0.09459459459459463	0.4780763790664781	0.7363834422657952	0.5797598627787307
396	1.0	0.0	1.0	1.0	1.0	0.7551020408163265	0.24489795918367352	0.9289940828402367	0.7889447236180904	0.8532608695652174	0.9057455803228286	0.09425441967717141	0.4943820224719101	0.7759336099585062	0.6039563988696003
393	1.0	0.0	1.0	1.0	1.0	0.7374701670644391	0.26252983293556087	0.891640866873065	0.7933884297520661	0.8396501457725948	0.9142610530353888	0.08573894696461115	0.5361702127659574	0.7590361445783133	0.628428927680798
407	1.0	0.0	1.0	1.0	1.0	0.7663551401869159	0.23364485981308414	0.9642857142857143	0.7864077669902912	0.8663101604278075	0.9216306954436451	0.07836930455635494	0.5607808340727596	0.6624737945492662	0.6074002883229217
405	1.0	0.0	1.0	1.0	1.0	0.7686915887850467	0.23130841121495327	0.9643916913946587	0.7888349514563107	0.8678237650200266	0.9213429256594724	0.0786570743405276	0.5592920353982301	0.6624737945492662	0.6065259117082533
408	1.0	0.0	1.0	1.0	1.0	0.7589743589743589	0.24102564102564106	0.9166666666666666	0.7994186046511628	0.8540372670807452	0.9165232358003442	0.08347676419965577	0.5512820512820513	0.7610619469026548	0.6394052044609665
392	1.0	0.0	1.0	1.0	1.0	0.7820823244552058	0.21791767554479424	0.9461077844311377	0.8144329896907216	0.8753462603878117	0.9250670755078574	0.07493292449214262	0.5798668885191348	0.715605749486653	0.640625
392	1.0	0.0	1.0	1.0	1.0	0.7820823244552058	0.21791767554479424	0.9461077844311377	0.8144329896907216	0.8753462603878117	0.9250670755078574	0.07493292449214262	0.5798668885191348	0.715605749486653	0.640625
392	1.0	0.0	1.0	1.0	1.0	0.7820823244552058	0.21791767554479424	0.9461077844311377	0.8144329896907216	0.8753462603878117	0.9250670755078574	0.07493292449214262	0.5798668885191348	0.715605749486653	0.640625
392	1.0	0.0	1.0	1.0	1.0	0.7820823244552058	0.21791767554479424	0.9461077844311377	0.8144329896907216	0.8753462603878117	0.9250670755078574	0.07493292449214262	0.5798668885191348	0.715605749486653	0.640625
400	1.0	0.0	1.0	1.0	1.0	0.7900262467191601	0.2099737532808399	0.9421768707482994	0.8147058823529412	0.8738170347003155	0.9172716851356515	0.0827283148643485	0.5550847457627118	0.7690802348336595	0.6447908121410992
400	1.0	0.0	1.0	1.0	1.0	0.7900262467191601	0.2099737532808399	0.9421768707482994	0.8147058823529412	0.8738170347003155	0.9172716851356515	0.0827283148643485	0.5550847457627118	0.7690802348336595	0.6447908121410992
400	1.0	0.0	1.0	1.0	1.0	0.7900262467191601	0.2099737532808399	0.9421768707482994	0.8147058823529412	0.8738170347003155	0.9172716851356515	0.0827283148643485	0.5550847457627118	0.7690802348336595	0.6447908121410992
400	1.0	0.0	1.0	1.0	1.0	0.7900262467191601	0.2099737532808399	0.9421768707482994	0.8147058823529412	0.8738170347003155	0.9172716851356515	0.0827283148643485	0.5550847457627118	0.7690802348336595	0.6447908121410992
400	1.0	0.0	1.0	1.0	1.0	0.7900262467191601	0.2099737532808399	0.9421768707482994	0.8147058823529412	0.8738170347003155	0.9172716851356515	0.0827283148643485	0.5550847457627118	0.7690802348336595	0.6447908121410992
400	1.0	0.0	1.0	1.0	1.0	0.7900262467191601	0.2099737532808399	0.9423728813559322	0.8152492668621701	0.8742138364779876	0.9177571878880504	0.08224281211194961	0.5572953736654804	0.7661448140900196	0.6452410383189122
400	1.0	0.0	1.0	1.0	1.0	0.7900262467191601	0.2099737532808399	0.9423728813559322	0.8152492668621701	0.8742138364779876	0.9177571878880504	0.08224281211194961	0.5572953736654804	0.7661448140900196	0.6452410383189122
404	1.0	0.0	1.0	1.0	1.0	0.7894736842105263	0.21052631578947367	0.9421768707482994	0.8147058823529412	0.8738170347003155	0.9181470869149952	0.08185291308500475	0.5592857142857143	0.7653958944281525	0.6463062319438712
404	1.0	0.0	1.0	1.0	1.0	0.7894736842105263	0.21052631578947367	0.9421768707482994	0.8147058823529412	0.8738170347003155	0.9181470869149952	0.08185291308500475	0.5592857142857143	0.7653958944281525	0.6463062319438712
404	1.0	0.0	1.0	1.0	1.0	0.7894736842105263	0.21052631578947367	0.9421768707482994	0.8147058823529412	0.8738170347003155	0.9181470869149952	0.08185291308500475	0.5592857142857143	0.7653958944281525	0.6463062319438712
404	1.0	0.0	1.0	1.0	1.0	0.7894736842105263	0.21052631578947367	0.9421768707482994	0.8147058823529412	0.8738170347003155	0.9181470869149952	0.08185291308500475	0.5592857142857143	0.7653958944281525	0.6463062319438712
393	1.0	0.0	1.0	1.0	1.0	0.7912371134020618	0.20876288659793818	0.9366666666666666	0.8192419825072886	0.8740279937791602	0.9177021601988148	0.08229783980118521	0.5558678847505271	0.7754901960784314	0.6475644699140402
393	1.0	0.0	1.0	1.0	1.0	0.7912371134020618	0.20876288659793818	0.9366666666666666	0.8192419825072886	0.8740279937791602	0.9177021601988148	0.08229783980118521	0.5558678847505271	0.7754901960784314	0.6475644699140402
393	1.0	0.0	1.0	1.0	1.0	0.7912371134020618	0.20876288659793818	0.9366666666666666	0.8192419825072886	0.8740279937791602	0.9177021601988148	0.08229783980118521	0.5558678847505271	0.7754901960784314	0.6475644699140402
388	1.0	0.0	1.0	1.0	1.0	0.7984496124031008	0.20155038759689925	0.9370860927152318	0.827485380116959	0.8788819875776397	0.9174154081437583	0.08258459185624167	0.5546218487394958	0.7764705882352941	0.6470588235294117
388	1.0	0.0	1.0	1.0	1.0	0.7984496124031008	0.20155038759689925	0.9370860927152318	0.827485380116959	0.8788819875776397	0.9174154081437583	0.08258459185624167	0.5546218487394958	0.7764705882352941	0.6470588235294117
388	1.0	0.0	1.0	1.0	1.0	0.7984496124031008	0.20155038759689925	0.9370860927152318	0.827485380116959	0.8788819875776397	0.9174154081437583	0.08258459185624167	0.5546218487394958	0.7764705882352941	0.6470588235294117
388	1.0	0.0	1.0	1.0	1.0	0.7984496124031008	0.20155038759689925	0.9370860927152318	0.827485380116959	0.8788819875776397	0.9174154081437583	0.08258459185624167	0.5546218487394958	0.7764705882352941	0.6470588235294117
388	1.0	0.0	1.0	1.0	1.0	0.7984496124031008	0.20155038759689925	0.9370860927152318	0.827485380116959	0.8788819875776397	0.9174154081437583	0.08258459185624167	0.5546218487394958	0.7764705882352941	0.6470588235294117
394	1.0	0.0	1.0	1.0	1.0	0.8047493403693932	0.19525065963060684	0.94	0.834319526627219	0.8840125391849529	0.91681787794862	0.08318212205137998	0.5536211699164345	0.775609756097561	0.6460788297440064
398	1.0	0.0	1.0	1.0	1.0	0.8083989501312336	0.19160104986876636	0.9403973509933775	0.8377581120943953	0.8861154446177847	0.9166109466042602	0.08338905339573977	0.5525400139178844	0.775390625	0.6452661519707436
398	1.0	0.0	1.0	1.0	1.0	0.8083989501312336	0.19160104986876636	0.9403973509933775	0.8377581120943953	0.8861154446177847	0.9166109466042602	0.08338905339573977	0.5525400139178844	0.775390625	0.6452661519707436
398	1.0	0.0	1.0	1.0	1.0	0.8083989501312336	0.19160104986876636	0.9403973509933775	0.8377581120943953	0.8861154446177847	0.9166109466042602	0.08338905339573977	0.5525400139178844	0.775390625	0.6452661519707436
398	1.0	0.0	1.0	1.0	1.0	0.8083989501312336	0.19160104986876636	0.9403973509933775	0.8377581120943953	0.8861154446177847	0.9166109466042602	0.08338905339573977	0.5525400139178844	0.775390625	0.6452661519707436
399	1.0	0.0	1.0	1.0	1.0	0.8048128342245989	0.19518716577540107	0.9403973509933775	0.8377581120943953	0.8861154446177847	0.9187822103454858	0.0812177896545142	0.5621007806955287	0.7719298245614035	0.6505133470225872
399	1.0	0.0	1.0	1.0	1.0	0.8048128342245989	0.19518716577540107	0.9403973509933775	0.8377581120943953	0.8861154446177847	0.9187822103454858	0.0812177896545142	0.5621007806955287	0.7719298245614035	0.6505133470225872
399	1.0	0.0	1.0	1.0	1.0	0.8048128342245989	0.19518716577540107	0.9403973509933775	0.8377581120943953	0.8861154446177847	0.9187822103454858	0.0812177896545142	0.5621007806955287	0.7719298245614035	0.6505133470225872
399	1.0	0.0	1.0	1.0	1.0	0.8048128342245989	0.19518716577540107	0.9403973509933775	0.8377581120943953	0.8861154446177847	0.9187822103454858	0.0812177896545142	0.5621007806955287	0.7719298245614035	0.6505133470225872
399	1.0	0.0	1.0	1.0	1.0	0.8048128342245989	0.19518716577540107	0.9403973509933775	0.8377581120943953	0.8861154446177847	0.9187822103454858	0.0812177896545142	0.5621007806955287	0.7719298245614035	0.6505133470225872
399	1.0	0.0	1.0	1.0	1.0	0.806970509383378	0.193029490616622	0.9403973509933775	0.8402366863905325	0.8875000000000001	0.9189808187804179	0.08101918121958207	0.5636623748211731	0.7672833495618305	0.6498969072164948
397	1.0	0.0	1.0	1.0	1.0	0.806970509383378	0.193029490616622	0.9403973509933775	0.8402366863905325	0.8875000000000001	0.9191716766867067	0.08082832331329326	0.5644699140401146	0.7672833495618305	0.6504333470903838
395	1.0	0.0	1.0	1.0	1.0	0.8091397849462365	0.1908602150537635	0.9403973509933775	0.8427299703264095	0.8888888888888888	0.9187977099236642	0.08120229007633584	0.5632594710507506	0.7665369649805448	0.6493613514627111
403	1.0	0.0	1.0	1.0	1.0	0.806970509383378	0.193029490616622	0.9403973509933775	0.8402366863905325	0.8875000000000001	0.9190762477335623	0.08092375226643767	0.5637918745545261	0.7702044790652386	0.6510288065843622
403	1.0	0.0	1.0	1.0	1.0	0.806970509383378	0.193029490616622	0.9403973509933775	0.8402366863905325	0.8875000000000001	0.9190762477335623	0.08092375226643767	0.5637918745545261	0.7702044790652386	0.6510288065843622
403	1.0	0.0	1.0	1.0	1.0	0.806970509383378	0.193029490616622	0.9403973509933775	0.8402366863905325	0.8875000000000001	0.9190762477335623	0.08092375226643767	0.5637918745545261	0.7702044790652386	0.6510288065843622
403	1.0	0.0	1.0	1.0	1.0	0.806970509383378	0.193029490616622	0.9403973509933775	0.8402366863905325	0.8875000000000001	0.9190762477335623	0.08092375226643767	0.5637918745545261	0.7702044790652386	0.6510288065843622
396	1.0	0.0	1.0	1.0	1.0	0.806970509383378	0.193029490616622	0.9403973509933775	0.8402366863905325	0.8875000000000001	0.9191716766867067	0.08082832331329326	0.5641940085592011	0.7702044790652386	0.6512968299711815
396	1.0	0.0	1.0	1.0	1.0	0.806970509383378	0.193029490616622	0.9403973509933775	0.8402366863905325	0.8875000000000001	0.9191716766867067	0.08082832331329326	0.5641940085592011	0.7702044790652386	0.6512968299711815
396	1.0	0.0	1.0	1.0	1.0	0.806970509383378	0.193029490616622	0.9403973509933775	0.8402366863905325	0.8875000000000001	0.9191716766867067	0.08082832331329326	0.5641940085592011	0.7702044790652386	0.6512968299711815
394	1.0	0.0	1.0	1.0	1.0	0.8113207547169812	0.18867924528301883	0.9403973509933775	0.8452380952380952	0.890282131661442	0.9189962789810132	0.08100372101898679	0.5643776824034334	0.7667638483965015	0.650185414091471
394	1.0	0.0	1.0	1.0	1.0	0.8113207547169812	0.18867924528301883	0.9403973509933775	0.8452380952380952	0.890282131661442	0.9189962789810132	0.08100372101898679	0.5643776824034334	0.7667638483965015	0.650185414091471
394	1.0	0.0	1.0	1.0	1.0	0.8113207547169812	0.18867924528301883	0.9403973509933775	0.8452380952380952	0.890282131661442	0.9189962789810132	0.08100372101898679	0.5643776824034334	0.7667638483965015	0.650185414091471
394	1.0	0.0	1.0	1.0	1.0	0.8113207547169812	0.18867924528301883	0.9403973509933775	0.8452380952380952	0.890282131661442	0.9189962789810132	0.08100372101898679	0.5643776824034334	0.7667638483965015	0.650185414091471
394	1.0	0.0	1.0	1.0	1.0	0.8113207547169812	0.18867924528301883	0.9403973509933775	0.8452380952380952	0.890282131661442	0.9189962789810132	0.08100372101898679	0.5643776824034334	0.7667638483965015	0.650185414091471
394	1.0	0.0	1.0	1.0	1.0	0.8113207547169812	0.18867924528301883	0.9403973509933775	0.8452380952380952	0.890282131661442	0.9189962789810132	0.08100372101898679	0.5643776824034334	0.7667638483965015	0.650185414091471
394	1.0	0.0	1.0	1.0	1.0	0.8113207547169812	0.18867924528301883	0.9403973509933775	0.8452380952380952	0.890282131661442	0.9189962789810132	0.08100372101898679	0.5643776824034334	0.7667638483965015	0.650185414091471
394	1.0	0.0	1.0	1.0	1.0	0.8113207547169812	0.18867924528301883	0.9403973509933775	0.8452380952380952	0.890282131661442	0.9189962789810132	0.08100372101898679	0.5643776824034334	0.7667638483965015	0.650185414091471
394	1.0	0.0	1.0	1.0	1.0	0.8113207547169812	0.18867924528301883	0.9403973509933775	0.8452380952380952	0.890282131661442	0.9189962789810132	0.08100372101898679	0.5643776824034334	0.7667638483965015	0.650185414091471
394	1.0	0.0	1.0	1.0	1.0	0.8113207547169812	0.18867924528301883	0.9403973509933775	0.8452380952380952	0.890282131661442	0.9189962789810132	0.08100372101898679	0.5643776824034334	0.7667638483965015	0.650185414091471
394	1.0	0.0	1.0	1.0	1.0	0.8113207547169812	0.18867924528301883	0.9403973509933775	0.8452380952380952	0.890282131661442	0.9189962789810132	0.08100372101898679	0.5643776824034334	0.7667638483965015	0.650185414091471
394	1.0	0.0	1.0	1.0	1.0	0.8113207547169812	0.18867924528301883	0.9403973509933775	0.8452380952380952	0.890282131661442	0.9189962789810132	0.08100372101898679	0.5643776824034334	0.7667638483965015	0.650185414091471
394	1.0	0.0	1.0	1.0	1.0	0.8113207547169812	0.18867924528301883	0.9403973509933775	0.8452380952380952	0.890282131661442	0.9189962789810132	0.08100372101898679	0.5643776824034334	0.7667638483965015	0.650185414091471
394	1.0	0.0	1.0	1.0	1.0	0.8113207547169812	0.18867924528301883	0.9403973509933775	0.8452380952380952	0.890282131661442	0.9189962789810132	0.08100372101898679	0.5643776824034334	0.7667638483965015	0.650185414091471
394	1.0	0.0	1.0	1.0	1.0	0.8113207547169812	0.18867924528301883	0.9403973509933775	0.8452380952380952	0.890282131661442	0.9189962789810132	0.08100372101898679	0.5643776824034334	0.7667638483965015	0.650185414091471
403	1.0	0.0	1.0	1.0	1.0	0.8086253369272237	0.19137466307277629	0.9401993355481728	0.8422619047619048	0.8885400313971742	0.9194733326972617	0.08052666730273828	0.5660242683797287	0.7706511175898931	0.6526748971193416
403	1.0	0.0	1.0	1.0	1.0	0.8086253369272237	0.19137466307277629	0.9401993355481728	0.8422619047619048	0.8885400313971742	0.9194733326972617	0.08052666730273828	0.5660242683797287	0.7706511175898931	0.6526748971193416
403	1.0	0.0	1.0	1.0	1.0	0.8086253369272237	0.19137466307277629	0.9401993355481728	0.8422619047619048	0.8885400313971742	0.9194733326972617	0.08052666730273828	0.5660242683797287	0.7706511175898931	0.6526748971193416
403	1.0	0.0	1.0	1.0	1.0	0.8086253369272237	0.19137466307277629	0.9401993355481728	0.8422619047619048	0.8885400313971742	0.9194733326972617	0.08052666730273828	0.5660242683797287	0.7706511175898931	0.6526748971193416
403	1.0	0.0	1.0	1.0	1.0	0.8086253369272237	0.19137466307277629	0.9401993355481728	0.8422619047619048	0.8885400313971742	0.9194733326972617	0.08052666730273828	0.5660242683797287	0.7706511175898931	0.6526748971193416
403	1.0	0.0	1.0	1.0	1.0	0.8086253369272237	0.19137466307277629	0.9401993355481728	0.8422619047619048	0.8885400313971742	0.9194733326972617	0.08052666730273828	0.5660242683797287	0.7706511175898931	0.6526748971193416
403	1.0	0.0	1.0	1.0	1.0	0.8086253369272237	0.19137466307277629	0.9401993355481728	0.8422619047619048	0.8885400313971742	0.9194733326972617	0.08052666730273828	0.5660242683797287	0.7706511175898931	0.6526748971193416
403	1.0	0.0	1.0	1.0	1.0	0.8086253369272237	0.19137466307277629	0.9401993355481728	0.8422619047619048	0.8885400313971742	0.9194733326972617	0.08052666730273828	0.5660242683797287	0.7706511175898931	0.6526748971193416
403	1.0	0.0	1.0	1.0	1.0	0.8086253369272237	0.19137466307277629	0.9401993355481728	0.8422619047619048	0.8885400313971742	0.9194733326972617	0.08052666730273828	0.5660242683797287	0.7706511175898931	0.6526748971193416
403	1.0	0.0	1.0	1.0	1.0	0.8086253369272237	0.19137466307277629	0.9401993355481728	0.8422619047619048	0.8885400313971742	0.9194733326972617	0.08052666730273828	0.5660242683797287	0.7706511175898931	0.6526748971193416
403	1.0	0.0	1.0	1.0	1.0	0.8086253369272237	0.19137466307277629	0.9401993355481728	0.8422619047619048	0.8885400313971742	0.9194733326972617	0.08052666730273828	0.5660242683797287	0.7706511175898931	0.6526748971193416
403	1.0	0.0	1.0	1.0	1.0	0.8086253369272237	0.19137466307277629	0.9401993355481728	0.8422619047619048	0.8885400313971742	0.9194733326972617	0.08052666730273828	0.5660242683797287	0.7706511175898931	0.6526748971193416
403	1.0	0.0	1.0	1.0	1.0	0.8086253369272237	0.19137466307277629	0.9401993355481728	0.8422619047619048	0.8885400313971742	0.9194733326972617	0.08052666730273828	0.5660242683797287	0.7706511175898931	0.6526748971193416
397	1.0	0.0	1.0	1.0	1.0	0.7961783439490446	0.20382165605095537	0.9678714859437751	0.8114478114478114	0.8827838827838828	0.9310246679316888	0.06897533206831119	0.64	0.7327102803738318	0.6832244008714597
400	1.0	0.0	1.0	1.0	1.0	0.7961783439490446	0.20382165605095537	0.9678714859437751	0.8114478114478114	0.8827838827838828	0.931214421252372	0.06878557874762803	0.6410466067048242	0.7327102803738318	0.6838203227213256
398	1.0	0.0	1.0	1.0	1.0	0.7917981072555205	0.20820189274447953	0.9678714859437751	0.8060200668896321	0.8795620437956204	0.9321438739679225	0.06785612603207747	0.6436126932465419	0.7406367041198502	0.6887244231606443
398	1.0	0.0	1.0	1.0	1.0	0.7917981072555205	0.20820189274447953	0.9678714859437751	0.8060200668896321	0.8795620437956204	0.9321438739679225	0.06785612603207747	0.6436126932465419	0.7406367041198502	0.6887244231606443
401	1.0	0.0	1.0	1.0	1.0	0.7968253968253968	0.20317460317460323	0.9678714859437751	0.8114478114478114	0.8827838827838828	0.9316823228010248	0.06831767719897519	0.6422764227642277	0.7383177570093458	0.6869565217391305
397	1.0	0.0	1.0	1.0	1.0	0.7987220447284346	0.20127795527156545	0.9678714859437751	0.8141891891891891	0.8844036697247707	0.9321696233753913	0.06783037662460867	0.6449511400651465	0.7394957983193278	0.6889952153110048
397	1.0	0.0	1.0	1.0	1.0	0.7987220447284346	0.20127795527156545	0.9678714859437751	0.8141891891891891	0.8844036697247707	0.9321696233753913	0.06783037662460867	0.6449511400651465	0.7394957983193278	0.6889952153110048
395	1.0	0.0	1.0	1.0	1.0	0.8211920529801324	0.17880794701986757	0.9794238683127572	0.8292682926829268	0.8981132075471697	0.9320507960576194	0.06794920394238058	0.6536833192209992	0.7148148148148148	0.6828836797877046
395	1.0	0.0	1.0	1.0	1.0	0.8211920529801324	0.17880794701986757	0.9794238683127572	0.8292682926829268	0.8981132075471697	0.9320507960576194	0.06794920394238058	0.6536833192209992	0.7148148148148148	0.6828836797877046
395	1.0	0.0	1.0	1.0	1.0	0.8211920529801324	0.17880794701986757	0.9794238683127572	0.8292682926829268	0.8981132075471697	0.9320507960576194	0.06794920394238058	0.6536833192209992	0.7148148148148148	0.6828836797877046
403	1.0	0.0	1.0	1.0	1.0	0.819672131147541	0.180327868852459	0.9678714859437751	0.8368055555555556	0.8975791433891993	0.9316522893165229	0.06834771068347711	0.647203947368421	0.7293790546802595	0.6858387799564271
403	1.0	0.0	1.0	1.0	1.0	0.819672131147541	0.180327868852459	0.9678714859437751	0.8368055555555556	0.8975791433891993	0.9316522893165229	0.06834771068347711	0.647203947368421	0.7293790546802595	0.6858387799564271
400	1.0	0.0	1.0	1.0	1.0	0.8233333333333334	0.17666666666666664	0.967741935483871	0.8421052631578947	0.9005628517823641	0.9332954330111806	0.06670456698881944	0.6588235294117647	0.7245841035120147	0.6901408450704225
400	1.0	0.0	1.0	1.0	1.0	0.8233333333333334	0.17666666666666664	0.967741935483871	0.8421052631578947	0.9005628517823641	0.9332954330111806	0.06670456698881944	0.6588235294117647	0.7245841035120147	0.6901408450704225
393	1.0	0.0	1.0	1.0	1.0	0.8233333333333334	0.17666666666666664	0.967741935483871	0.8421052631578947	0.9005628517823641	0.9332954330111806	0.06670456698881944	0.6588235294117647	0.7245841035120147	0.6901408450704225
400	1.0	0.0	1.0	1.0	1.0	0.8233333333333334	0.17666666666666664	0.967741935483871	0.8421052631578947	0.9005628517823641	0.9333901838165625	0.06660981618343753	0.6591099916036943	0.7255083179297597	0.6907171139463263
386	1.0	0.0	1.0	1.0	1.0	0.8260869565217391	0.17391304347826086	0.967741935483871	0.8450704225352113	0.9022556390977443	0.9333017527238275	0.06669824727617246	0.6591099916036943	0.7248384118190212	0.6904133685136324
386	1.0	0.0	1.0	1.0	1.0	0.8260869565217391	0.17391304347826086	0.967741935483871	0.8450704225352113	0.9022556390977443	0.9333017527238275	0.06669824727617246	0.6591099916036943	0.7248384118190212	0.6904133685136324
388	1.0	0.0	1.0	1.0	1.0	0.8260869565217391	0.17391304347826086	0.967741935483871	0.8450704225352113	0.9022556390977443	0.9335859782093794	0.06641402179062061	0.6610455311973018	0.7239150507848569	0.6910533274570295
388	1.0	0.0	1.0	1.0	1.0	0.8260869565217391	0.17391304347826086	0.967741935483871	0.8450704225352113	0.9022556390977443	0.9335859782093794	0.06641402179062061	0.6610455311973018	0.7239150507848569	0.6910533274570295
388	1.0	0.0	1.0	1.0	1.0	0.8260869565217391	0.17391304347826086	0.967741935483871	0.8450704225352113	0.9022556390977443	0.9335859782093794	0.06641402179062061	0.6610455311973018	0.7239150507848569	0.6910533274570295
388	1.0	0.0	1.0	1.0	1.0	0.8260869565217391	0.17391304347826086	0.967741935483871	0.8450704225352113	0.9022556390977443	0.9335859782093794	0.06641402179062061	0.6610455311973018	0.7239150507848569	0.6910533274570295
388	1.0	0.0	1.0	1.0	1.0	0.8260869565217391	0.17391304347826086	0.967741935483871	0.8450704225352113	0.9022556390977443	0.9335859782093794	0.06641402179062061	0.6610455311973018	0.7239150507848569	0.6910533274570295
