# Supplementary material for: An Improved Hybrid Feature Selection Algorithm for Electric Charge Recovery Risk
Source: Hindawi journal article supplement (doi:10.1155/2020/8479341), 2020-08-28
Supplement: f1 [file 8479341.f1.zip › 8479341.f1/Experimental Results/201807/BGA_SBS_results.csv]

features_num	Accuracy_high	Loss_high	Precission_high	Recall_high	F1_high	Accuracy_med	Loss_med	Precission_med	Recall_med	F1_med	Accuracy_low	Loss_low	Precission_low	Recall_low	F1_low
388	1	0	1	1	1	0.803858521	0.196141479	0.968	0.820338983	0.888073394	0.932941288	0.067058712	0.651452282	0.732276119	0.689503733
387	1	0	1	1	1	0.823333333	0.176666667	0.967741935	0.842105263	0.900562852	0.933484935	0.066515065	0.659395973	0.726432532	0.691292876
387	1	0	1	1	1	0.823333333	0.176666667	0.967741935	0.842105263	0.900562852	0.933484935	0.066515065	0.659395973	0.726432532	0.691292876
387	1	0	1	1	1	0.823333333	0.176666667	0.967741935	0.842105263	0.900562852	0.933484935	0.066515065	0.659395973	0.726432532	0.691292876
387	1	0	1	1	1	0.823333333	0.176666667	0.967741935	0.842105263	0.900562852	0.933484935	0.066515065	0.659395973	0.726432532	0.691292876
386	1	0	1	1	1	0.826086957	0.173913043	0.967741935	0.845070423	0.902255639	0.933301753	0.066698247	0.659109992	0.724838412	0.690413369
386	1	0	1	1	1	0.826086957	0.173913043	0.967741935	0.845070423	0.902255639	0.933301753	0.066698247	0.659109992	0.724838412	0.690413369
385	1	0	1	1	1	0.826086957	0.173913043	0.967741935	0.845070423	0.902255639	0.933396495	0.066603505	0.659663866	0.724838412	0.690717114
385	1	0	1	1	1	0.826086957	0.173913043	0.967741935	0.845070423	0.902255639	0.933396495	0.066603505	0.659663866	0.724838412	0.690717114
385	1	0	1	1	1	0.826086957	0.173913043	0.967741935	0.845070423	0.902255639	0.933396495	0.066603505	0.659663866	0.724838412	0.690717114
384	1	0	1	1	1	0.826086957	0.173913043	0.967741935	0.845070423	0.902255639	0.933491236	0.066508764	0.659949622	0.725761773	0.691292876
384	1	0	1	1	1	0.826086957	0.173913043	0.967741935	0.845070423	0.902255639	0.933491236	0.066508764	0.659949622	0.725761773	0.691292876
384	1	0	1	1	1	0.826086957	0.173913043	0.967741935	0.845070423	0.902255639	0.933491236	0.066508764	0.659949622	0.725761773	0.691292876
384	1	0	1	1	1	0.826086957	0.173913043	0.967741935	0.845070423	0.902255639	0.933491236	0.066508764	0.659949622	0.725761773	0.691292876
384	1	0	1	1	1	0.826086957	0.173913043	0.967741935	0.845070423	0.902255639	0.933491236	0.066508764	0.659949622	0.725761773	0.691292876
384	1	0	1	1	1	0.826086957	0.173913043	0.967741935	0.845070423	0.902255639	0.933491236	0.066508764	0.659949622	0.725761773	0.691292876
384	1	0	1	1	1	0.826086957	0.173913043	0.967741935	0.845070423	0.902255639	0.933491236	0.066508764	0.659949622	0.725761773	0.691292876
384	1	0	1	1	1	0.826086957	0.173913043	0.967741935	0.845070423	0.902255639	0.933491236	0.066508764	0.659949622	0.725761773	0.691292876
384	1	0	1	1	1	0.826086957	0.173913043	0.967741935	0.845070423	0.902255639	0.933491236	0.066508764	0.659949622	0.725761773	0.691292876
384	1	0	1	1	1	0.826086957	0.173913043	0.967741935	0.845070423	0.902255639	0.933491236	0.066508764	0.659949622	0.725761773	0.691292876
384	1	0	1	1	1	0.826086957	0.173913043	0.967741935	0.845070423	0.902255639	0.933491236	0.066508764	0.659949622	0.725761773	0.691292876
384	1	0	1	1	1	0.826086957	0.173913043	0.967741935	0.845070423	0.902255639	0.933491236	0.066508764	0.659949622	0.725761773	0.691292876
384	1	0	1	1	1	0.826086957	0.173913043	0.967741935	0.845070423	0.902255639	0.933491236	0.066508764	0.659949622	0.725761773	0.691292876
384	1	0	1	1	1	0.826086957	0.173913043	0.967741935	0.845070423	0.902255639	0.933491236	0.066508764	0.659949622	0.725761773	0.691292876
384	1	0	1	1	1	0.826086957	0.173913043	0.967741935	0.845070423	0.902255639	0.933491236	0.066508764	0.659949622	0.725761773	0.691292876
384	1	0	1	1	1	0.826086957	0.173913043	0.967741935	0.845070423	0.902255639	0.933491236	0.066508764	0.659949622	0.725761773	0.691292876
384	1	0	1	1	1	0.826086957	0.173913043	0.967741935	0.845070423	0.902255639	0.933491236	0.066508764	0.659949622	0.725761773	0.691292876
384	1	0	1	1	1	0.826086957	0.173913043	0.967741935	0.845070423	0.902255639	0.933491236	0.066508764	0.659949622	0.725761773	0.691292876
384	1	0	1	1	1	0.826086957	0.173913043	0.967741935	0.845070423	0.902255639	0.933491236	0.066508764	0.659949622	0.725761773	0.691292876
384	1	0	1	1	1	0.826086957	0.173913043	0.967741935	0.845070423	0.902255639	0.933491236	0.066508764	0.659949622	0.725761773	0.691292876
384	1	0	1	1	1	0.826086957	0.173913043	0.967741935	0.845070423	0.902255639	0.933491236	0.066508764	0.659949622	0.725761773	0.691292876
384	1	0	1	1	1	0.826086957	0.173913043	0.967741935	0.845070423	0.902255639	0.933491236	0.066508764	0.659949622	0.725761773	0.691292876
384	1	0	1	1	1	0.826086957	0.173913043	0.967741935	0.845070423	0.902255639	0.933491236	0.066508764	0.659949622	0.725761773	0.691292876
384	1	0	1	1	1	0.826086957	0.173913043	0.967741935	0.845070423	0.902255639	0.933491236	0.066508764	0.659949622	0.725761773	0.691292876
384	1	0	1	1	1	0.826086957	0.173913043	0.967741935	0.845070423	0.902255639	0.933491236	0.066508764	0.659949622	0.725761773	0.691292876
384	1	0	1	1	1	0.826086957	0.173913043	0.967741935	0.845070423	0.902255639	0.933491236	0.066508764	0.659949622	0.725761773	0.691292876
384	1	0	1	1	1	0.826086957	0.173913043	0.967741935	0.845070423	0.902255639	0.933491236	0.066508764	0.659949622	0.725761773	0.691292876
384	1	0	1	1	1	0.826086957	0.173913043	0.967741935	0.845070423	0.902255639	0.933491236	0.066508764	0.659949622	0.725761773	0.691292876
384	1	0	1	1	1	0.826086957	0.173913043	0.967741935	0.845070423	0.902255639	0.933491236	0.066508764	0.659949622	0.725761773	0.691292876
384	1	0	1	1	1	0.826086957	0.173913043	0.967741935	0.845070423	0.902255639	0.933491236	0.066508764	0.659949622	0.725761773	0.691292876
384	1	0	1	1	1	0.826086957	0.173913043	0.967741935	0.845070423	0.902255639	0.933491236	0.066508764	0.659949622	0.725761773	0.691292876
384	1	0	1	1	1	0.826086957	0.173913043	0.967741935	0.845070423	0.902255639	0.933491236	0.066508764	0.659949622	0.725761773	0.691292876
384	1	0	1	1	1	0.826086957	0.173913043	0.967741935	0.845070423	0.902255639	0.933491236	0.066508764	0.659949622	0.725761773	0.691292876
384	1	0	1	1	1	0.826086957	0.173913043	0.967741935	0.845070423	0.902255639	0.933491236	0.066508764	0.659949622	0.725761773	0.691292876
384	1	0	1	1	1	0.826086957	0.173913043	0.967741935	0.845070423	0.902255639	0.933491236	0.066508764	0.659949622	0.725761773	0.691292876
384	1	0	1	1	1	0.826086957	0.173913043	0.967741935	0.845070423	0.902255639	0.933491236	0.066508764	0.659949622	0.725761773	0.691292876
384	1	0	1	1	1	0.826086957	0.173913043	0.967741935	0.845070423	0.902255639	0.933491236	0.066508764	0.659949622	0.725761773	0.691292876
384	1	0	1	1	1	0.826086957	0.173913043	0.967741935	0.845070423	0.902255639	0.933491236	0.066508764	0.659949622	0.725761773	0.691292876
384	1	0	1	1	1	0.826086957	0.173913043	0.967741935	0.845070423	0.902255639	0.933491236	0.066508764	0.659949622	0.725761773	0.691292876
384	1	0	1	1	1	0.826086957	0.173913043	0.967741935	0.845070423	0.902255639	0.933491236	0.066508764	0.659949622	0.725761773	0.691292876
384	1	0	1	1	1	0.826086957	0.173913043	0.967741935	0.845070423	0.902255639	0.933491236	0.066508764	0.659949622	0.725761773	0.691292876
384	1	0	1	1	1	0.826086957	0.173913043	0.967741935	0.845070423	0.902255639	0.933491236	0.066508764	0.659949622	0.725761773	0.691292876
384	1	0	1	1	1	0.826086957	0.173913043	0.967741935	0.845070423	0.902255639	0.933491236	0.066508764	0.659949622	0.725761773	0.691292876
384	1	0	1	1	1	0.826086957	0.173913043	0.967741935	0.845070423	0.902255639	0.933491236	0.066508764	0.659949622	0.725761773	0.691292876
384	1	0	1	1	1	0.826086957	0.173913043	0.967741935	0.845070423	0.902255639	0.933491236	0.066508764	0.659949622	0.725761773	0.691292876
384	1	0	1	1	1	0.826086957	0.173913043	0.967741935	0.845070423	0.902255639	0.933491236	0.066508764	0.659949622	0.725761773	0.691292876
384	1	0	1	1	1	0.826086957	0.173913043	0.967741935	0.845070423	0.902255639	0.933491236	0.066508764	0.659949622	0.725761773	0.691292876
384	1	0	1	1	1	0.826086957	0.173913043	0.967741935	0.845070423	0.902255639	0.933491236	0.066508764	0.659949622	0.725761773	0.691292876
384	1	0	1	1	1	0.826086957	0.173913043	0.967741935	0.845070423	0.902255639	0.933491236	0.066508764	0.659949622	0.725761773	0.691292876
384	1	0	1	1	1	0.826086957	0.173913043	0.967741935	0.845070423	0.902255639	0.933491236	0.066508764	0.659949622	0.725761773	0.691292876
384	1	0	1	1	1	0.826086957	0.173913043	0.967741935	0.845070423	0.902255639	0.933491236	0.066508764	0.659949622	0.725761773	0.691292876
384	1	0	1	1	1	0.826086957	0.173913043	0.967741935	0.845070423	0.902255639	0.933491236	0.066508764	0.659949622	0.725761773	0.691292876
383	1	0	1	1	1	0.826086957	0.173913043	0.967741935	0.845070423	0.902255639	0.933491236	0.066508764	0.659681475	0.726685134	0.691564148
383	1	0	1	1	1	0.826086957	0.173913043	0.967741935	0.845070423	0.902255639	0.933491236	0.066508764	0.659681475	0.726685134	0.691564148
383	1	0	1	1	1	0.826086957	0.173913043	0.967741935	0.845070423	0.902255639	0.933491236	0.066508764	0.659681475	0.726685134	0.691564148
383	1	0	1	1	1	0.826086957	0.173913043	0.967741935	0.845070423	0.902255639	0.933491236	0.066508764	0.659681475	0.726685134	0.691564148
383	1	0	1	1	1	0.826086957	0.173913043	0.967741935	0.845070423	0.902255639	0.933491236	0.066508764	0.659681475	0.726685134	0.691564148
383	1	0	1	1	1	0.826086957	0.173913043	0.967741935	0.845070423	0.902255639	0.933491236	0.066508764	0.659681475	0.726685134	0.691564148
383	1	0	1	1	1	0.826086957	0.173913043	0.967741935	0.845070423	0.902255639	0.933491236	0.066508764	0.659681475	0.726685134	0.691564148
383	1	0	1	1	1	0.826086957	0.173913043	0.967741935	0.845070423	0.902255639	0.933491236	0.066508764	0.659681475	0.726685134	0.691564148
383	1	0	1	1	1	0.826086957	0.173913043	0.967741935	0.845070423	0.902255639	0.933491236	0.066508764	0.659681475	0.726685134	0.691564148
383	1	0	1	1	1	0.826086957	0.173913043	0.967741935	0.845070423	0.902255639	0.933491236	0.066508764	0.659681475	0.726685134	0.691564148
383	1	0	1	1	1	0.826086957	0.173913043	0.967741935	0.845070423	0.902255639	0.933491236	0.066508764	0.659681475	0.726685134	0.691564148
383	1	0	1	1	1	0.826086957	0.173913043	0.967741935	0.845070423	0.902255639	0.933491236	0.066508764	0.659681475	0.726685134	0.691564148
383	1	0	1	1	1	0.826086957	0.173913043	0.967741935	0.845070423	0.902255639	0.933491236	0.066508764	0.659681475	0.726685134	0.691564148
383	1	0	1	1	1	0.826086957	0.173913043	0.967741935	0.845070423	0.902255639	0.933491236	0.066508764	0.659681475	0.726685134	0.691564148
383	1	0	1	1	1	0.826086957	0.173913043	0.967741935	0.845070423	0.902255639	0.933491236	0.066508764	0.659681475	0.726685134	0.691564148
383	1	0	1	1	1	0.826086957	0.173913043	0.967741935	0.845070423	0.902255639	0.933491236	0.066508764	0.659681475	0.726685134	0.691564148
383	1	0	1	1	1	0.826086957	0.173913043	0.967741935	0.845070423	0.902255639	0.933491236	0.066508764	0.659681475	0.726685134	0.691564148
383	1	0	1	1	1	0.826086957	0.173913043	0.967741935	0.845070423	0.902255639	0.933491236	0.066508764	0.659681475	0.726685134	0.691564148
383	1	0	1	1	1	0.826086957	0.173913043	0.967741935	0.845070423	0.902255639	0.933491236	0.066508764	0.659681475	0.726685134	0.691564148
383	1	0	1	1	1	0.826086957	0.173913043	0.967741935	0.845070423	0.902255639	0.933491236	0.066508764	0.659681475	0.726685134	0.691564148
383	1	0	1	1	1	0.826086957	0.173913043	0.967741935	0.845070423	0.902255639	0.933491236	0.066508764	0.659681475	0.726685134	0.691564148
383	1	0	1	1	1	0.826086957	0.173913043	0.967741935	0.845070423	0.902255639	0.933491236	0.066508764	0.659681475	0.726685134	0.691564148
383	1	0	1	1	1	0.826086957	0.173913043	0.967741935	0.845070423	0.902255639	0.933491236	0.066508764	0.659681475	0.726685134	0.691564148
383	1	0	1	1	1	0.826086957	0.173913043	0.967741935	0.845070423	0.902255639	0.933491236	0.066508764	0.659681475	0.726685134	0.691564148
383	1	0	1	1	1	0.826086957	0.173913043	0.967741935	0.845070423	0.902255639	0.933491236	0.066508764	0.659681475	0.726685134	0.691564148
383	1	0	1	1	1	0.826086957	0.173913043	0.967741935	0.845070423	0.902255639	0.933491236	0.066508764	0.659681475	0.726685134	0.691564148
383	1	0	1	1	1	0.826086957	0.173913043	0.967741935	0.845070423	0.902255639	0.933491236	0.066508764	0.659681475	0.726685134	0.691564148
383	1	0	1	1	1	0.826086957	0.173913043	0.967741935	0.845070423	0.902255639	0.933491236	0.066508764	0.659681475	0.726685134	0.691564148
383	1	0	1	1	1	0.826086957	0.173913043	0.967741935	0.845070423	0.902255639	0.933491236	0.066508764	0.659681475	0.726685134	0.691564148
383	1	0	1	1	1	0.826086957	0.173913043	0.967741935	0.845070423	0.902255639	0.933491236	0.066508764	0.659681475	0.726685134	0.691564148
383	1	0	1	1	1	0.826086957	0.173913043	0.967741935	0.845070423	0.902255639	0.933491236	0.066508764	0.659681475	0.726685134	0.691564148
383	1	0	1	1	1	0.826086957	0.173913043	0.967741935	0.845070423	0.902255639	0.933491236	0.066508764	0.659681475	0.726685134	0.691564148
382	1	0	1	1	1	0.826086957	0.173913043	0.967741935	0.845070423	0.902255639	0.933491236	0.066508764	0.659681475	0.726685134	0.691564148
382	1	0	1	1	1	0.826086957	0.173913043	0.967741935	0.845070423	0.902255639	0.933491236	0.066508764	0.659681475	0.726685134	0.691564148
382	1	0	1	1	1	0.826086957	0.173913043	0.967741935	0.845070423	0.902255639	0.933491236	0.066508764	0.659681475	0.726685134	0.691564148
382	1	0	1	1	1	0.826086957	0.173913043	0.967741935	0.845070423	0.902255639	0.933491236	0.066508764	0.659681475	0.726685134	0.691564148
382	1	0	1	1	1	0.826086957	0.173913043	0.967741935	0.845070423	0.902255639	0.933491236	0.066508764	0.659681475	0.726685134	0.691564148
382	1	0	1	1	1	0.826086957	0.173913043	0.967741935	0.845070423	0.902255639	0.933491236	0.066508764	0.659681475	0.726685134	0.691564148
382	1	0	1	1	1	0.826086957	0.173913043	0.967741935	0.845070423	0.902255639	0.933491236	0.066508764	0.659681475	0.726685134	0.691564148
382	1	0	1	1	1	0.826086957	0.173913043	0.967741935	0.845070423	0.902255639	0.933491236	0.066508764	0.659681475	0.726685134	0.691564148
382	1	0	1	1	1	0.826086957	0.173913043	0.967741935	0.845070423	0.902255639	0.933491236	0.066508764	0.659681475	0.726685134	0.691564148
382	1	0	1	1	1	0.826086957	0.173913043	0.967741935	0.845070423	0.902255639	0.933491236	0.066508764	0.659681475	0.726685134	0.691564148
382	1	0	1	1	1	0.826086957	0.173913043	0.967741935	0.845070423	0.902255639	0.933491236	0.066508764	0.659681475	0.726685134	0.691564148
382	1	0	1	1	1	0.826086957	0.173913043	0.967741935	0.845070423	0.902255639	0.933491236	0.066508764	0.659681475	0.726685134	0.691564148
382	1	0	1	1	1	0.826086957	0.173913043	0.967741935	0.845070423	0.902255639	0.933491236	0.066508764	0.659681475	0.726685134	0.691564148
382	1	0	1	1	1	0.826086957	0.173913043	0.967741935	0.845070423	0.902255639	0.933491236	0.066508764	0.659681475	0.726685134	0.691564148
382	1	0	1	1	1	0.826086957	0.173913043	0.967741935	0.845070423	0.902255639	0.933491236	0.066508764	0.659681475	0.726685134	0.691564148
382	1	0	1	1	1	0.826086957	0.173913043	0.967741935	0.845070423	0.902255639	0.933491236	0.066508764	0.659681475	0.726685134	0.691564148
382	1	0	1	1	1	0.826086957	0.173913043	0.967741935	0.845070423	0.902255639	0.933491236	0.066508764	0.659681475	0.726685134	0.691564148
382	1	0	1	1	1	0.826086957	0.173913043	0.967741935	0.845070423	0.902255639	0.933491236	0.066508764	0.659681475	0.726685134	0.691564148
382	1	0	1	1	1	0.826086957	0.173913043	0.967741935	0.845070423	0.902255639	0.933491236	0.066508764	0.659681475	0.726685134	0.691564148
382	1	0	1	1	1	0.826086957	0.173913043	0.967741935	0.845070423	0.902255639	0.933491236	0.066508764	0.659681475	0.726685134	0.691564148
382	1	0	1	1	1	0.826086957	0.173913043	0.967741935	0.845070423	0.902255639	0.933491236	0.066508764	0.659681475	0.726685134	0.691564148
382	1	0	1	1	1	0.826086957	0.173913043	0.967741935	0.845070423	0.902255639	0.933491236	0.066508764	0.659681475	0.726685134	0.691564148
382	1	0	1	1	1	0.826086957	0.173913043	0.967741935	0.845070423	0.902255639	0.933491236	0.066508764	0.659681475	0.726685134	0.691564148
382	1	0	1	1	1	0.826086957	0.173913043	0.967741935	0.845070423	0.902255639	0.933491236	0.066508764	0.659681475	0.726685134	0.691564148
382	1	0	1	1	1	0.826086957	0.173913043	0.967741935	0.845070423	0.902255639	0.933491236	0.066508764	0.659681475	0.726685134	0.691564148
382	1	0	1	1	1	0.826086957	0.173913043	0.967741935	0.845070423	0.902255639	0.933491236	0.066508764	0.659681475	0.726685134	0.691564148
382	1	0	1	1	1	0.826086957	0.173913043	0.967741935	0.845070423	0.902255639	0.933491236	0.066508764	0.659681475	0.726685134	0.691564148
382	1	0	1	1	1	0.826086957	0.173913043	0.967741935	0.845070423	0.902255639	0.933491236	0.066508764	0.659681475	0.726685134	0.691564148
382	1	0	1	1	1	0.826086957	0.173913043	0.967741935	0.845070423	0.902255639	0.933491236	0.066508764	0.659681475	0.726685134	0.691564148
382	1	0	1	1	1	0.826086957	0.173913043	0.967741935	0.845070423	0.902255639	0.933491236	0.066508764	0.659681475	0.726685134	0.691564148
382	1	0	1	1	1	0.826086957	0.173913043	0.967741935	0.845070423	0.902255639	0.933491236	0.066508764	0.659681475	0.726685134	0.691564148
382	1	0	1	1	1	0.826086957	0.173913043	0.967741935	0.845070423	0.902255639	0.933491236	0.066508764	0.659681475	0.726685134	0.691564148
382	1	0	1	1	1	0.826086957	0.173913043	0.967741935	0.845070423	0.902255639	0.933491236	0.066508764	0.659681475	0.726685134	0.691564148
382	1	0	1	1	1	0.826086957	0.173913043	0.967741935	0.845070423	0.902255639	0.933491236	0.066508764	0.659681475	0.726685134	0.691564148
382	1	0	1	1	1	0.826086957	0.173913043	0.967741935	0.845070423	0.902255639	0.933491236	0.066508764	0.659681475	0.726685134	0.691564148
382	1	0	1	1	1	0.826086957	0.173913043	0.967741935	0.845070423	0.902255639	0.933491236	0.066508764	0.659681475	0.726685134	0.691564148
382	1	0	1	1	1	0.826086957	0.173913043	0.967741935	0.845070423	0.902255639	0.933491236	0.066508764	0.659681475	0.726685134	0.691564148
382	1	0	1	1	1	0.826086957	0.173913043	0.967741935	0.845070423	0.902255639	0.933491236	0.066508764	0.659681475	0.726685134	0.691564148
382	1	0	1	1	1	0.826086957	0.173913043	0.967741935	0.845070423	0.902255639	0.933491236	0.066508764	0.659681475	0.726685134	0.691564148
382	1	0	1	1	1	0.826086957	0.173913043	0.967741935	0.845070423	0.902255639	0.933491236	0.066508764	0.659681475	0.726685134	0.691564148
382	1	0	1	1	1	0.826086957	0.173913043	0.967741935	0.845070423	0.902255639	0.933491236	0.066508764	0.659681475	0.726685134	0.691564148
382	1	0	1	1	1	0.826086957	0.173913043	0.967741935	0.845070423	0.902255639	0.933491236	0.066508764	0.659681475	0.726685134	0.691564148
382	1	0	1	1	1	0.826086957	0.173913043	0.967741935	0.845070423	0.902255639	0.933491236	0.066508764	0.659681475	0.726685134	0.691564148
382	1	0	1	1	1	0.826086957	0.173913043	0.967741935	0.845070423	0.902255639	0.933491236	0.066508764	0.659681475	0.726685134	0.691564148
382	1	0	1	1	1	0.826086957	0.173913043	0.967741935	0.845070423	0.902255639	0.933491236	0.066508764	0.659681475	0.726685134	0.691564148
382	1	0	1	1	1	0.826086957	0.173913043	0.967741935	0.845070423	0.902255639	0.933491236	0.066508764	0.659681475	0.726685134	0.691564148
382	1	0	1	1	1	0.826086957	0.173913043	0.967741935	0.845070423	0.902255639	0.933491236	0.066508764	0.659681475	0.726685134	0.691564148
382	1	0	1	1	1	0.826086957	0.173913043	0.967741935	0.845070423	0.902255639	0.933491236	0.066508764	0.659681475	0.726685134	0.691564148
382	1	0	1	1	1	0.826086957	0.173913043	0.967741935	0.845070423	0.902255639	0.933491236	0.066508764	0.659681475	0.726685134	0.691564148
382	1	0	1	1	1	0.826086957	0.173913043	0.967741935	0.845070423	0.902255639	0.933491236	0.066508764	0.659681475	0.726685134	0.691564148
382	1	0	1	1	1	0.826086957	0.173913043	0.967741935	0.845070423	0.902255639	0.933491236	0.066508764	0.659681475	0.726685134	0.691564148
382	1	0	1	1	1	0.826086957	0.173913043	0.967741935	0.845070423	0.902255639	0.933491236	0.066508764	0.659681475	0.726685134	0.691564148
382	1	0	1	1	1	0.826086957	0.173913043	0.967741935	0.845070423	0.902255639	0.933491236	0.066508764	0.659681475	0.726685134	0.691564148
382	1	0	1	1	1	0.826086957	0.173913043	0.967741935	0.845070423	0.902255639	0.933491236	0.066508764	0.659681475	0.726685134	0.691564148
382	1	0	1	1	1	0.826086957	0.173913043	0.967741935	0.845070423	0.902255639	0.933491236	0.066508764	0.659681475	0.726685134	0.691564148
382	1	0	1	1	1	0.826086957	0.173913043	0.967741935	0.845070423	0.902255639	0.933491236	0.066508764	0.659681475	0.726685134	0.691564148
382	1	0	1	1	1	0.826086957	0.173913043	0.967741935	0.845070423	0.902255639	0.933491236	0.066508764	0.659681475	0.726685134	0.691564148
381	1	0	1	1	1	0.826086957	0.173913043	0.967741935	0.845070423	0.902255639	0.933491236	0.066508764	0.659681475	0.726685134	0.691564148
381	1	0	1	1	1	0.826086957	0.173913043	0.967741935	0.845070423	0.902255639	0.933491236	0.066508764	0.659681475	0.726685134	0.691564148
381	1	0	1	1	1	0.826086957	0.173913043	0.967741935	0.845070423	0.902255639	0.933491236	0.066508764	0.659681475	0.726685134	0.691564148
381	1	0	1	1	1	0.826086957	0.173913043	0.967741935	0.845070423	0.902255639	0.933491236	0.066508764	0.659681475	0.726685134	0.691564148
381	1	0	1	1	1	0.826086957	0.173913043	0.967741935	0.845070423	0.902255639	0.933491236	0.066508764	0.659681475	0.726685134	0.691564148
381	1	0	1	1	1	0.826086957	0.173913043	0.967741935	0.845070423	0.902255639	0.933491236	0.066508764	0.659681475	0.726685134	0.691564148
381	1	0	1	1	1	0.826086957	0.173913043	0.967741935	0.845070423	0.902255639	0.933491236	0.066508764	0.659681475	0.726685134	0.691564148
381	1	0	1	1	1	0.826086957	0.173913043	0.967741935	0.845070423	0.902255639	0.933491236	0.066508764	0.659681475	0.726685134	0.691564148
381	1	0	1	1	1	0.826086957	0.173913043	0.967741935	0.845070423	0.902255639	0.933491236	0.066508764	0.659681475	0.726685134	0.691564148
381	1	0	1	1	1	0.826086957	0.173913043	0.967741935	0.845070423	0.902255639	0.933491236	0.066508764	0.659681475	0.726685134	0.691564148
381	1	0	1	1	1	0.826086957	0.173913043	0.967741935	0.845070423	0.902255639	0.933491236	0.066508764	0.659681475	0.726685134	0.691564148
381	1	0	1	1	1	0.826086957	0.173913043	0.967741935	0.845070423	0.902255639	0.933491236	0.066508764	0.659681475	0.726685134	0.691564148
381	1	0	1	1	1	0.826086957	0.173913043	0.967741935	0.845070423	0.902255639	0.933491236	0.066508764	0.659681475	0.726685134	0.691564148
381	1	0	1	1	1	0.826086957	0.173913043	0.967741935	0.845070423	0.902255639	0.933491236	0.066508764	0.659681475	0.726685134	0.691564148
381	1	0	1	1	1	0.826086957	0.173913043	0.967741935	0.845070423	0.902255639	0.933491236	0.066508764	0.659681475	0.726685134	0.691564148
381	1	0	1	1	1	0.826086957	0.173913043	0.967741935	0.845070423	0.902255639	0.933491236	0.066508764	0.659681475	0.726685134	0.691564148
381	1	0	1	1	1	0.826086957	0.173913043	0.967741935	0.845070423	0.902255639	0.933491236	0.066508764	0.659681475	0.726685134	0.691564148
381	1	0	1	1	1	0.826086957	0.173913043	0.967741935	0.845070423	0.902255639	0.933491236	0.066508764	0.659681475	0.726685134	0.691564148
381	1	0	1	1	1	0.826086957	0.173913043	0.967741935	0.845070423	0.902255639	0.933491236	0.066508764	0.659681475	0.726685134	0.691564148
381	1	0	1	1	1	0.826086957	0.173913043	0.967741935	0.845070423	0.902255639	0.933491236	0.066508764	0.659681475	0.726685134	0.691564148
381	1	0	1	1	1	0.826086957	0.173913043	0.967741935	0.845070423	0.902255639	0.933491236	0.066508764	0.659681475	0.726685134	0.691564148
381	1	0	1	1	1	0.826086957	0.173913043	0.967741935	0.845070423	0.902255639	0.933491236	0.066508764	0.659681475	0.726685134	0.691564148
381	1	0	1	1	1	0.826086957	0.173913043	0.967741935	0.845070423	0.902255639	0.933491236	0.066508764	0.659681475	0.726685134	0.691564148
381	1	0	1	1	1	0.826086957	0.173913043	0.967741935	0.845070423	0.902255639	0.933491236	0.066508764	0.659681475	0.726685134	0.691564148
381	1	0	1	1	1	0.826086957	0.173913043	0.967741935	0.845070423	0.902255639	0.933491236	0.066508764	0.659681475	0.726685134	0.691564148
381	1	0	1	1	1	0.826086957	0.173913043	0.967741935	0.845070423	0.902255639	0.933491236	0.066508764	0.659681475	0.726685134	0.691564148
381	1	0	1	1	1	0.826086957	0.173913043	0.967741935	0.845070423	0.902255639	0.933491236	0.066508764	0.659681475	0.726685134	0.691564148
381	1	0	1	1	1	0.826086957	0.173913043	0.967741935	0.845070423	0.902255639	0.933491236	0.066508764	0.659681475	0.726685134	0.691564148
381	1	0	1	1	1	0.826086957	0.173913043	0.967741935	0.845070423	0.902255639	0.933491236	0.066508764	0.659681475	0.726685134	0.691564148
381	1	0	1	1	1	0.826086957	0.173913043	0.967741935	0.845070423	0.902255639	0.933491236	0.066508764	0.659681475	0.726685134	0.691564148
381	1	0	1	1	1	0.826086957	0.173913043	0.967741935	0.845070423	0.902255639	0.933491236	0.066508764	0.659681475	0.726685134	0.691564148
381	1	0	1	1	1	0.826086957	0.173913043	0.967741935	0.845070423	0.902255639	0.933491236	0.066508764	0.659681475	0.726685134	0.691564148
381	1	0	1	1	1	0.826086957	0.173913043	0.967741935	0.845070423	0.902255639	0.933491236	0.066508764	0.659681475	0.726685134	0.691564148
381	1	0	1	1	1	0.826086957	0.173913043	0.967741935	0.845070423	0.902255639	0.933491236	0.066508764	0.659681475	0.726685134	0.691564148
381	1	0	1	1	1	0.826086957	0.173913043	0.967741935	0.845070423	0.902255639	0.933491236	0.066508764	0.659681475	0.726685134	0.691564148
381	1	0	1	1	1	0.826086957	0.173913043	0.967741935	0.845070423	0.902255639	0.933491236	0.066508764	0.659681475	0.726685134	0.691564148
381	1	0	1	1	1	0.826086957	0.173913043	0.967741935	0.845070423	0.902255639	0.933491236	0.066508764	0.659681475	0.726685134	0.691564148
381	1	0	1	1	1	0.826086957	0.173913043	0.967741935	0.845070423	0.902255639	0.933491236	0.066508764	0.659681475	0.726685134	0.691564148
381	1	0	1	1	1	0.826086957	0.173913043	0.967741935	0.845070423	0.902255639	0.933491236	0.066508764	0.659681475	0.726685134	0.691564148
381	1	0	1	1	1	0.826086957	0.173913043	0.967741935	0.845070423	0.902255639	0.933491236	0.066508764	0.659681475	0.726685134	0.691564148
381	1	0	1	1	1	0.826086957	0.173913043	0.967741935	0.845070423	0.902255639	0.933491236	0.066508764	0.659681475	0.726685134	0.691564148
381	1	0	1	1	1	0.826086957	0.173913043	0.967741935	0.845070423	0.902255639	0.933491236	0.066508764	0.659681475	0.726685134	0.691564148
381	1	0	1	1	1	0.826086957	0.173913043	0.967741935	0.845070423	0.902255639	0.933491236	0.066508764	0.659681475	0.726685134	0.691564148
381	1	0	1	1	1	0.826086957	0.173913043	0.967741935	0.845070423	0.902255639	0.933491236	0.066508764	0.659681475	0.726685134	0.691564148
381	1	0	1	1	1	0.826086957	0.173913043	0.967741935	0.845070423	0.902255639	0.933491236	0.066508764	0.659681475	0.726685134	0.691564148
381	1	0	1	1	1	0.826086957	0.173913043	0.967741935	0.845070423	0.902255639	0.933491236	0.066508764	0.659681475	0.726685134	0.691564148
381	1	0	1	1	1	0.826086957	0.173913043	0.967741935	0.845070423	0.902255639	0.933491236	0.066508764	0.659681475	0.726685134	0.691564148
381	1	0	1	1	1	0.826086957	0.173913043	0.967741935	0.845070423	0.902255639	0.933491236	0.066508764	0.659681475	0.726685134	0.691564148
381	1	0	1	1	1	0.826086957	0.173913043	0.967741935	0.845070423	0.902255639	0.933491236	0.066508764	0.659681475	0.726685134	0.691564148
381	1	0	1	1	1	0.826086957	0.173913043	0.967741935	0.845070423	0.902255639	0.933491236	0.066508764	0.659681475	0.726685134	0.691564148
381	1	0	1	1	1	0.826086957	0.173913043	0.967741935	0.845070423	0.902255639	0.933491236	0.066508764	0.659681475	0.726685134	0.691564148
381	1	0	1	1	1	0.826086957	0.173913043	0.967741935	0.845070423	0.902255639	0.933491236	0.066508764	0.659681475	0.726685134	0.691564148
381	1	0	1	1	1	0.826086957	0.173913043	0.967741935	0.845070423	0.902255639	0.933491236	0.066508764	0.659681475	0.726685134	0.691564148
381	1	0	1	1	1	0.826086957	0.173913043	0.967741935	0.845070423	0.902255639	0.933491236	0.066508764	0.659681475	0.726685134	0.691564148
381	1	0	1	1	1	0.826086957	0.173913043	0.967741935	0.845070423	0.902255639	0.933491236	0.066508764	0.659681475	0.726685134	0.691564148
381	1	0	1	1	1	0.826086957	0.173913043	0.967741935	0.845070423	0.902255639	0.933491236	0.066508764	0.659681475	0.726685134	0.691564148
381	1	0	1	1	1	0.826086957	0.173913043	0.967741935	0.845070423	0.902255639	0.933491236	0.066508764	0.659681475	0.726685134	0.691564148
381	1	0	1	1	1	0.826086957	0.173913043	0.967741935	0.845070423	0.902255639	0.933491236	0.066508764	0.659681475	0.726685134	0.691564148
381	1	0	1	1	1	0.826086957	0.173913043	0.967741935	0.845070423	0.902255639	0.933491236	0.066508764	0.659681475	0.726685134	0.691564148
381	1	0	1	1	1	0.826086957	0.173913043	0.967741935	0.845070423	0.902255639	0.933491236	0.066508764	0.659681475	0.726685134	0.691564148
381	1	0	1	1	1	0.826086957	0.173913043	0.967741935	0.845070423	0.902255639	0.933491236	0.066508764	0.659681475	0.726685134	0.691564148
381	1	0	1	1	1	0.826086957	0.173913043	0.967741935	0.845070423	0.902255639	0.933491236	0.066508764	0.659681475	0.726685134	0.691564148
381	1	0	1	1	1	0.826086957	0.173913043	0.967741935	0.845070423	0.902255639	0.933491236	0.066508764	0.659681475	0.726685134	0.691564148
381	1	0	1	1	1	0.826086957	0.173913043	0.967741935	0.845070423	0.902255639	0.933491236	0.066508764	0.659681475	0.726685134	0.691564148
381	1	0	1	1	1	0.826086957	0.173913043	0.967741935	0.845070423	0.902255639	0.933491236	0.066508764	0.659681475	0.726685134	0.691564148
381	1	0	1	1	1	0.826086957	0.173913043	0.967741935	0.845070423	0.902255639	0.933491236	0.066508764	0.659681475	0.726685134	0.691564148
381	1	0	1	1	1	0.826086957	0.173913043	0.967741935	0.845070423	0.902255639	0.933491236	0.066508764	0.659681475	0.726685134	0.691564148
381	1	0	1	1	1	0.826086957	0.173913043	0.967741935	0.845070423	0.902255639	0.933491236	0.066508764	0.659681475	0.726685134	0.691564148
381	1	0	1	1	1	0.826086957	0.173913043	0.967741935	0.845070423	0.902255639	0.933491236	0.066508764	0.659681475	0.726685134	0.691564148
381	1	0	1	1	1	0.826086957	0.173913043	0.967741935	0.845070423	0.902255639	0.933491236	0.066508764	0.659681475	0.726685134	0.691564148
381	1	0	1	1	1	0.826086957	0.173913043	0.967741935	0.845070423	0.902255639	0.933491236	0.066508764	0.659681475	0.726685134	0.691564148
381	1	0	1	1	1	0.826086957	0.173913043	0.967741935	0.845070423	0.902255639	0.933491236	0.066508764	0.659681475	0.726685134	0.691564148
381	1	0	1	1	1	0.826086957	0.173913043	0.967741935	0.845070423	0.902255639	0.933491236	0.066508764	0.659681475	0.726685134	0.691564148
381	1	0	1	1	1	0.826086957	0.173913043	0.967741935	0.845070423	0.902255639	0.933491236	0.066508764	0.659681475	0.726685134	0.691564148
381	1	0	1	1	1	0.826086957	0.173913043	0.967741935	0.845070423	0.902255639	0.933491236	0.066508764	0.659681475	0.726685134	0.691564148
381	1	0	1	1	1	0.826086957	0.173913043	0.967741935	0.845070423	0.902255639	0.933491236	0.066508764	0.659681475	0.726685134	0.691564148
381	1	0	1	1	1	0.826086957	0.173913043	0.967741935	0.845070423	0.902255639	0.933491236	0.066508764	0.659681475	0.726685134	0.691564148
381	1	0	1	1	1	0.826086957	0.173913043	0.967741935	0.845070423	0.902255639	0.933491236	0.066508764	0.659681475	0.726685134	0.691564148
381	1	0	1	1	1	0.826086957	0.173913043	0.967741935	0.845070423	0.902255639	0.933491236	0.066508764	0.659681475	0.726685134	0.691564148
381	1	0	1	1	1	0.826086957	0.173913043	0.967741935	0.845070423	0.902255639	0.933491236	0.066508764	0.659681475	0.726685134	0.691564148
381	1	0	1	1	1	0.826086957	0.173913043	0.967741935	0.845070423	0.902255639	0.933491236	0.066508764	0.659681475	0.726685134	0.691564148
381	1	0	1	1	1	0.826086957	0.173913043	0.967741935	0.845070423	0.902255639	0.933491236	0.066508764	0.659681475	0.726685134	0.691564148
381	1	0	1	1	1	0.826086957	0.173913043	0.967741935	0.845070423	0.902255639	0.933491236	0.066508764	0.659681475	0.726685134	0.691564148
381	1	0	1	1	1	0.826086957	0.173913043	0.967741935	0.845070423	0.902255639	0.933491236	0.066508764	0.659681475	0.726685134	0.691564148
381	1	0	1	1	1	0.826086957	0.173913043	0.967741935	0.845070423	0.902255639	0.933491236	0.066508764	0.659681475	0.726685134	0.691564148
381	1	0	1	1	1	0.826086957	0.173913043	0.967741935	0.845070423	0.902255639	0.933491236	0.066508764	0.659681475	0.726685134	0.691564148
381	1	0	1	1	1	0.826086957	0.173913043	0.967741935	0.845070423	0.902255639	0.933491236	0.066508764	0.659681475	0.726685134	0.691564148
381	1	0	1	1	1	0.826086957	0.173913043	0.967741935	0.845070423	0.902255639	0.933491236	0.066508764	0.659681475	0.726685134	0.691564148
381	1	0	1	1	1	0.826086957	0.173913043	0.967741935	0.845070423	0.902255639	0.933491236	0.066508764	0.659681475	0.726685134	0.691564148
381	1	0	1	1	1	0.826086957	0.173913043	0.967741935	0.845070423	0.902255639	0.933491236	0.066508764	0.659681475	0.726685134	0.691564148
381	1	0	1	1	1	0.826086957	0.173913043	0.967741935	0.845070423	0.902255639	0.933491236	0.066508764	0.659681475	0.726685134	0.691564148
381	1	0	1	1	1	0.826086957	0.173913043	0.967741935	0.845070423	0.902255639	0.933491236	0.066508764	0.659681475	0.726685134	0.691564148
381	1	0	1	1	1	0.826086957	0.173913043	0.967741935	0.845070423	0.902255639	0.933491236	0.066508764	0.659681475	0.726685134	0.691564148
381	1	0	1	1	1	0.826086957	0.173913043	0.967741935	0.845070423	0.902255639	0.933491236	0.066508764	0.659681475	0.726685134	0.691564148
381	1	0	1	1	1	0.826086957	0.173913043	0.967741935	0.845070423	0.902255639	0.933491236	0.066508764	0.659681475	0.726685134	0.691564148
381	1	0	1	1	1	0.826086957	0.173913043	0.967741935	0.845070423	0.902255639	0.933491236	0.066508764	0.659681475	0.726685134	0.691564148
381	1	0	1	1	1	0.826086957	0.173913043	0.967741935	0.845070423	0.902255639	0.933491236	0.066508764	0.659681475	0.726685134	0.691564148
381	1	0	1	1	1	0.826086957	0.173913043	0.967741935	0.845070423	0.902255639	0.933491236	0.066508764	0.659681475	0.726685134	0.691564148
381	1	0	1	1	1	0.826086957	0.173913043	0.967741935	0.845070423	0.902255639	0.933491236	0.066508764	0.659681475	0.726685134	0.691564148
381	1	0	1	1	1	0.826086957	0.173913043	0.967741935	0.845070423	0.902255639	0.933491236	0.066508764	0.659681475	0.726685134	0.691564148
381	1	0	1	1	1	0.826086957	0.173913043	0.967741935	0.845070423	0.902255639	0.933491236	0.066508764	0.659681475	0.726685134	0.691564148
381	1	0	1	1	1	0.826086957	0.173913043	0.967741935	0.845070423	0.902255639	0.933491236	0.066508764	0.659681475	0.726685134	0.691564148
381	1	0	1	1	1	0.826086957	0.173913043	0.967741935	0.845070423	0.902255639	0.933491236	0.066508764	0.659681475	0.726685134	0.691564148
381	1	0	1	1	1	0.826086957	0.173913043	0.967741935	0.845070423	0.902255639	0.933491236	0.066508764	0.659681475	0.726685134	0.691564148
381	1	0	1	1	1	0.826086957	0.173913043	0.967741935	0.845070423	0.902255639	0.933491236	0.066508764	0.659681475	0.726685134	0.691564148
381	1	0	1	1	1	0.826086957	0.173913043	0.967741935	0.845070423	0.902255639	0.933491236	0.066508764	0.659681475	0.726685134	0.691564148
381	1	0	1	1	1	0.826086957	0.173913043	0.967741935	0.845070423	0.902255639	0.933491236	0.066508764	0.659681475	0.726685134	0.691564148
381	1	0	1	1	1	0.826086957	0.173913043	0.967741935	0.845070423	0.902255639	0.933491236	0.066508764	0.659681475	0.726685134	0.691564148
381	1	0	1	1	1	0.826086957	0.173913043	0.967741935	0.845070423	0.902255639	0.933491236	0.066508764	0.659681475	0.726685134	0.691564148
381	1	0	1	1	1	0.826086957	0.173913043	0.967741935	0.845070423	0.902255639	0.933491236	0.066508764	0.659681475	0.726685134	0.691564148
381	1	0	1	1	1	0.826086957	0.173913043	0.967741935	0.845070423	0.902255639	0.933491236	0.066508764	0.659681475	0.726685134	0.691564148
381	1	0	1	1	1	0.826086957	0.173913043	0.967741935	0.845070423	0.902255639	0.933491236	0.066508764	0.659681475	0.726685134	0.691564148
381	1	0	1	1	1	0.826086957	0.173913043	0.967741935	0.845070423	0.902255639	0.933491236	0.066508764	0.659681475	0.726685134	0.691564148
381	1	0	1	1	1	0.826086957	0.173913043	0.967741935	0.845070423	0.902255639	0.933491236	0.066508764	0.659681475	0.726685134	0.691564148
381	1	0	1	1	1	0.826086957	0.173913043	0.967741935	0.845070423	0.902255639	0.933491236	0.066508764	0.659681475	0.726685134	0.691564148
381	1	0	1	1	1	0.826086957	0.173913043	0.967741935	0.845070423	0.902255639	0.933491236	0.066508764	0.659681475	0.726685134	0.691564148
381	1	0	1	1	1	0.826086957	0.173913043	0.967741935	0.845070423	0.902255639	0.933491236	0.066508764	0.659681475	0.726685134	0.691564148
381	1	0	1	1	1	0.826086957	0.173913043	0.967741935	0.845070423	0.902255639	0.933491236	0.066508764	0.659681475	0.726685134	0.691564148
381	1	0	1	1	1	0.826086957	0.173913043	0.967741935	0.845070423	0.902255639	0.933491236	0.066508764	0.659681475	0.726685134	0.691564148
381	1	0	1	1	1	0.826086957	0.173913043	0.967741935	0.845070423	0.902255639	0.933491236	0.066508764	0.659681475	0.726685134	0.691564148
381	1	0	1	1	1	0.826086957	0.173913043	0.967741935	0.845070423	0.902255639	0.933491236	0.066508764	0.659681475	0.726685134	0.691564148
381	1	0	1	1	1	0.826086957	0.173913043	0.967741935	0.845070423	0.902255639	0.933491236	0.066508764	0.659681475	0.726685134	0.691564148
381	1	0	1	1	1	0.826086957	0.173913043	0.967741935	0.845070423	0.902255639	0.933491236	0.066508764	0.659681475	0.726685134	0.691564148
381	1	0	1	1	1	0.826086957	0.173913043	0.967741935	0.845070423	0.902255639	0.933491236	0.066508764	0.659681475	0.726685134	0.691564148
381	1	0	1	1	1	0.826086957	0.173913043	0.967741935	0.845070423	0.902255639	0.933491236	0.066508764	0.659681475	0.726685134	0.691564148
381	1	0	1	1	1	0.826086957	0.173913043	0.967741935	0.845070423	0.902255639	0.933491236	0.066508764	0.659681475	0.726685134	0.691564148
381	1	0	1	1	1	0.826086957	0.173913043	0.967741935	0.845070423	0.902255639	0.933491236	0.066508764	0.659681475	0.726685134	0.691564148
381	1	0	1	1	1	0.826086957	0.173913043	0.967741935	0.845070423	0.902255639	0.933491236	0.066508764	0.659681475	0.726685134	0.691564148
381	1	0	1	1	1	0.826086957	0.173913043	0.967741935	0.845070423	0.902255639	0.933491236	0.066508764	0.659681475	0.726685134	0.691564148
381	1	0	1	1	1	0.826086957	0.173913043	0.967741935	0.845070423	0.902255639	0.933491236	0.066508764	0.659681475	0.726685134	0.691564148
381	1	0	1	1	1	0.826086957	0.173913043	0.967741935	0.845070423	0.902255639	0.933491236	0.066508764	0.659681475	0.726685134	0.691564148
381	1	0	1	1	1	0.826086957	0.173913043	0.967741935	0.845070423	0.902255639	0.933491236	0.066508764	0.659681475	0.726685134	0.691564148
381	1	0	1	1	1	0.826086957	0.173913043	0.967741935	0.845070423	0.902255639	0.933491236	0.066508764	0.659681475	0.726685134	0.691564148
381	1	0	1	1	1	0.826086957	0.173913043	0.967741935	0.845070423	0.902255639	0.933491236	0.066508764	0.659681475	0.726685134	0.691564148
381	1	0	1	1	1	0.826086957	0.173913043	0.967741935	0.845070423	0.902255639	0.933491236	0.066508764	0.659681475	0.726685134	0.691564148
381	1	0	1	1	1	0.826086957	0.173913043	0.967741935	0.845070423	0.902255639	0.933491236	0.066508764	0.659681475	0.726685134	0.691564148
381	1	0	1	1	1	0.826086957	0.173913043	0.967741935	0.845070423	0.902255639	0.933491236	0.066508764	0.659681475	0.726685134	0.691564148
381	1	0	1	1	1	0.826086957	0.173913043	0.967741935	0.845070423	0.902255639	0.933491236	0.066508764	0.659681475	0.726685134	0.691564148
381	1	0	1	1	1	0.826086957	0.173913043	0.967741935	0.845070423	0.902255639	0.933491236	0.066508764	0.659681475	0.726685134	0.691564148
381	1	0	1	1	1	0.826086957	0.173913043	0.967741935	0.845070423	0.902255639	0.933491236	0.066508764	0.659681475	0.726685134	0.691564148
381	1	0	1	1	1	0.826086957	0.173913043	0.967741935	0.845070423	0.902255639	0.933491236	0.066508764	0.659681475	0.726685134	0.691564148
381	1	0	1	1	1	0.826086957	0.173913043	0.967741935	0.845070423	0.902255639	0.933491236	0.066508764	0.659681475	0.726685134	0.691564148
381	1	0	1	1	1	0.826086957	0.173913043	0.967741935	0.845070423	0.902255639	0.933491236	0.066508764	0.659681475	0.726685134	0.691564148
381	1	0	1	1	1	0.826086957	0.173913043	0.967741935	0.845070423	0.902255639	0.933491236	0.066508764	0.659681475	0.726685134	0.691564148
381	1	0	1	1	1	0.826086957	0.173913043	0.967741935	0.845070423	0.902255639	0.933491236	0.066508764	0.659681475	0.726685134	0.691564148
381	1	0	1	1	1	0.826086957	0.173913043	0.967741935	0.845070423	0.902255639	0.933491236	0.066508764	0.659681475	0.726685134	0.691564148
381	1	0	1	1	1	0.826086957	0.173913043	0.967741935	0.845070423	0.902255639	0.933491236	0.066508764	0.659681475	0.726685134	0.691564148
381	1	0	1	1	1	0.826086957	0.173913043	0.967741935	0.845070423	0.902255639	0.933491236	0.066508764	0.659681475	0.726685134	0.691564148
381	1	0	1	1	1	0.826086957	0.173913043	0.967741935	0.845070423	0.902255639	0.933491236	0.066508764	0.659681475	0.726685134	0.691564148
381	1	0	1	1	1	0.826086957	0.173913043	0.967741935	0.845070423	0.902255639	0.933491236	0.066508764	0.659681475	0.726685134	0.691564148
381	1	0	1	1	1	0.826086957	0.173913043	0.967741935	0.845070423	0.902255639	0.933491236	0.066508764	0.659681475	0.726685134	0.691564148
381	1	0	1	1	1	0.826086957	0.173913043	0.967741935	0.845070423	0.902255639	0.933491236	0.066508764	0.659681475	0.726685134	0.691564148
381	1	0	1	1	1	0.826086957	0.173913043	0.967741935	0.845070423	0.902255639	0.933491236	0.066508764	0.659681475	0.726685134	0.691564148
381	1	0	1	1	1	0.826086957	0.173913043	0.967741935	0.845070423	0.902255639	0.933491236	0.066508764	0.659681475	0.726685134	0.691564148
381	1	0	1	1	1	0.826086957	0.173913043	0.967741935	0.845070423	0.902255639	0.933491236	0.066508764	0.659681475	0.726685134	0.691564148
381	1	0	1	1	1	0.826086957	0.173913043	0.967741935	0.845070423	0.902255639	0.933491236	0.066508764	0.659681475	0.726685134	0.691564148
381	1	0	1	1	1	0.826086957	0.173913043	0.967741935	0.845070423	0.902255639	0.933491236	0.066508764	0.659681475	0.726685134	0.691564148
381	1	0	1	1	1	0.826086957	0.173913043	0.967741935	0.845070423	0.902255639	0.933491236	0.066508764	0.659681475	0.726685134	0.691564148
381	1	0	1	1	1	0.826086957	0.173913043	0.967741935	0.845070423	0.902255639	0.933491236	0.066508764	0.659681475	0.726685134	0.691564148
381	1	0	1	1	1	0.826086957	0.173913043	0.967741935	0.845070423	0.902255639	0.933491236	0.066508764	0.659681475	0.726685134	0.691564148
381	1	0	1	1	1	0.826086957	0.173913043	0.967741935	0.845070423	0.902255639	0.933491236	0.066508764	0.659681475	0.726685134	0.691564148
381	1	0	1	1	1	0.826086957	0.173913043	0.967741935	0.845070423	0.902255639	0.933491236	0.066508764	0.659681475	0.726685134	0.691564148
381	1	0	1	1	1	0.826086957	0.173913043	0.967741935	0.845070423	0.902255639	0.933491236	0.066508764	0.659681475	0.726685134	0.691564148
381	1	0	1	1	1	0.826086957	0.173913043	0.967741935	0.845070423	0.902255639	0.933491236	0.066508764	0.659681475	0.726685134	0.691564148
381	1	0	1	1	1	0.826086957	0.173913043	0.967741935	0.845070423	0.902255639	0.933491236	0.066508764	0.659681475	0.726685134	0.691564148
381	1	0	1	1	1	0.826086957	0.173913043	0.967741935	0.845070423	0.902255639	0.933491236	0.066508764	0.659681475	0.726685134	0.691564148
381	1	0	1	1	1	0.826086957	0.173913043	0.967741935	0.845070423	0.902255639	0.933491236	0.066508764	0.659681475	0.726685134	0.691564148
381	1	0	1	1	1	0.826086957	0.173913043	0.967741935	0.845070423	0.902255639	0.933491236	0.066508764	0.659681475	0.726685134	0.691564148
381	1	0	1	1	1	0.826086957	0.173913043	0.967741935	0.845070423	0.902255639	0.933491236	0.066508764	0.659681475	0.726685134	0.691564148
381	1	0	1	1	1	0.826086957	0.173913043	0.967741935	0.845070423	0.902255639	0.933491236	0.066508764	0.659681475	0.726685134	0.691564148
381	1	0	1	1	1	0.826086957	0.173913043	0.967741935	0.845070423	0.902255639	0.933491236	0.066508764	0.659681475	0.726685134	0.691564148
381	1	0	1	1	1	0.826086957	0.173913043	0.967741935	0.845070423	0.902255639	0.933491236	0.066508764	0.659681475	0.726685134	0.691564148
381	1	0	1	1	1	0.826086957	0.173913043	0.967741935	0.845070423	0.902255639	0.933491236	0.066508764	0.659681475	0.726685134	0.691564148
381	1	0	1	1	1	0.826086957	0.173913043	0.967741935	0.845070423	0.902255639	0.933491236	0.066508764	0.659681475	0.726685134	0.691564148
381	1	0	1	1	1	0.826086957	0.173913043	0.967741935	0.845070423	0.902255639	0.933491236	0.066508764	0.659681475	0.726685134	0.691564148
381	1	0	1	1	1	0.826086957	0.173913043	0.967741935	0.845070423	0.902255639	0.933491236	0.066508764	0.659681475	0.726685134	0.691564148
381	1	0	1	1	1	0.826086957	0.173913043	0.967741935	0.845070423	0.902255639	0.933491236	0.066508764	0.659681475	0.726685134	0.691564148
381	1	0	1	1	1	0.826086957	0.173913043	0.967741935	0.845070423	0.902255639	0.933491236	0.066508764	0.659681475	0.726685134	0.691564148
381	1	0	1	1	1	0.826086957	0.173913043	0.967741935	0.845070423	0.902255639	0.933491236	0.066508764	0.659681475	0.726685134	0.691564148
381	1	0	1	1	1	0.826086957	0.173913043	0.967741935	0.845070423	0.902255639	0.933491236	0.066508764	0.659681475	0.726685134	0.691564148
381	1	0	1	1	1	0.826086957	0.173913043	0.967741935	0.845070423	0.902255639	0.933491236	0.066508764	0.659681475	0.726685134	0.691564148
381	1	0	1	1	1	0.826086957	0.173913043	0.967741935	0.845070423	0.902255639	0.933491236	0.066508764	0.659681475	0.726685134	0.691564148
381	1	0	1	1	1	0.826086957	0.173913043	0.967741935	0.845070423	0.902255639	0.933491236	0.066508764	0.659681475	0.726685134	0.691564148
381	1	0	1	1	1	0.826086957	0.173913043	0.967741935	0.845070423	0.902255639	0.933491236	0.066508764	0.659681475	0.726685134	0.691564148
381	1	0	1	1	1	0.826086957	0.173913043	0.967741935	0.845070423	0.902255639	0.933491236	0.066508764	0.659681475	0.726685134	0.691564148
381	1	0	1	1	1	0.826086957	0.173913043	0.967741935	0.845070423	0.902255639	0.933491236	0.066508764	0.659681475	0.726685134	0.691564148
381	1	0	1	1	1	0.826086957	0.173913043	0.967741935	0.845070423	0.902255639	0.933491236	0.066508764	0.659681475	0.726685134	0.691564148
380	1	0	1	1	1	0.826086957	0.173913043	0.967741935	0.845070423	0.902255639	0.933491236	0.066508764	0.659681475	0.726685134	0.691564148
380	1	0	1	1	1	0.826086957	0.173913043	0.967741935	0.845070423	0.902255639	0.933491236	0.066508764	0.659681475	0.726685134	0.691564148
380	1	0	1	1	1	0.826086957	0.173913043	0.967741935	0.845070423	0.902255639	0.933491236	0.066508764	0.659681475	0.726685134	0.691564148
380	1	0	1	1	1	0.826086957	0.173913043	0.967741935	0.845070423	0.902255639	0.933491236	0.066508764	0.659681475	0.726685134	0.691564148
380	1	0	1	1	1	0.826086957	0.173913043	0.967741935	0.845070423	0.902255639	0.933491236	0.066508764	0.659681475	0.726685134	0.691564148
380	1	0	1	1	1	0.826086957	0.173913043	0.967741935	0.845070423	0.902255639	0.933491236	0.066508764	0.659681475	0.726685134	0.691564148
380	1	0	1	1	1	0.826086957	0.173913043	0.967741935	0.845070423	0.902255639	0.933491236	0.066508764	0.659681475	0.726685134	0.691564148
380	1	0	1	1	1	0.826086957	0.173913043	0.967741935	0.845070423	0.902255639	0.933491236	0.066508764	0.659681475	0.726685134	0.691564148
380	1	0	1	1	1	0.826086957	0.173913043	0.967741935	0.845070423	0.902255639	0.933491236	0.066508764	0.659681475	0.726685134	0.691564148
380	1	0	1	1	1	0.826086957	0.173913043	0.967741935	0.845070423	0.902255639	0.933491236	0.066508764	0.659681475	0.726685134	0.691564148
380	1	0	1	1	1	0.826086957	0.173913043	0.967741935	0.845070423	0.902255639	0.933491236	0.066508764	0.659681475	0.726685134	0.691564148
380	1	0	1	1	1	0.826086957	0.173913043	0.967741935	0.845070423	0.902255639	0.933491236	0.066508764	0.659681475	0.726685134	0.691564148
380	1	0	1	1	1	0.826086957	0.173913043	0.967741935	0.845070423	0.902255639	0.933491236	0.066508764	0.659681475	0.726685134	0.691564148
380	1	0	1	1	1	0.826086957	0.173913043	0.967741935	0.845070423	0.902255639	0.933491236	0.066508764	0.659681475	0.726685134	0.691564148
380	1	0	1	1	1	0.826086957	0.173913043	0.967741935	0.845070423	0.902255639	0.933491236	0.066508764	0.659681475	0.726685134	0.691564148
380	1	0	1	1	1	0.826086957	0.173913043	0.967741935	0.845070423	0.902255639	0.933491236	0.066508764	0.659681475	0.726685134	0.691564148
380	1	0	1	1	1	0.826086957	0.173913043	0.967741935	0.845070423	0.902255639	0.933491236	0.066508764	0.659681475	0.726685134	0.691564148
380	1	0	1	1	1	0.826086957	0.173913043	0.967741935	0.845070423	0.902255639	0.933491236	0.066508764	0.659681475	0.726685134	0.691564148
380	1	0	1	1	1	0.826086957	0.173913043	0.967741935	0.845070423	0.902255639	0.933491236	0.066508764	0.659681475	0.726685134	0.691564148
380	1	0	1	1	1	0.826086957	0.173913043	0.967741935	0.845070423	0.902255639	0.933491236	0.066508764	0.659681475	0.726685134	0.691564148
380	1	0	1	1	1	0.826086957	0.173913043	0.967741935	0.845070423	0.902255639	0.933491236	0.066508764	0.659681475	0.726685134	0.691564148
380	1	0	1	1	1	0.826086957	0.173913043	0.967741935	0.845070423	0.902255639	0.933491236	0.066508764	0.659681475	0.726685134	0.691564148
380	1	0	1	1	1	0.826086957	0.173913043	0.967741935	0.845070423	0.902255639	0.933491236	0.066508764	0.659681475	0.726685134	0.691564148
380	1	0	1	1	1	0.826086957	0.173913043	0.967741935	0.845070423	0.902255639	0.933491236	0.066508764	0.659681475	0.726685134	0.691564148
380	1	0	1	1	1	0.826086957	0.173913043	0.967741935	0.845070423	0.902255639	0.933491236	0.066508764	0.659681475	0.726685134	0.691564148
380	1	0	1	1	1	0.826086957	0.173913043	0.967741935	0.845070423	0.902255639	0.933491236	0.066508764	0.659681475	0.726685134	0.691564148
380	1	0	1	1	1	0.826086957	0.173913043	0.967741935	0.845070423	0.902255639	0.933491236	0.066508764	0.659681475	0.726685134	0.691564148
380	1	0	1	1	1	0.826086957	0.173913043	0.967741935	0.845070423	0.902255639	0.933491236	0.066508764	0.659681475	0.726685134	0.691564148
380	1	0	1	1	1	0.826086957	0.173913043	0.967741935	0.845070423	0.902255639	0.933491236	0.066508764	0.659681475	0.726685134	0.691564148
380	1	0	1	1	1	0.826086957	0.173913043	0.967741935	0.845070423	0.902255639	0.933491236	0.066508764	0.659681475	0.726685134	0.691564148
380	1	0	1	1	1	0.826086957	0.173913043	0.967741935	0.845070423	0.902255639	0.933491236	0.066508764	0.659681475	0.726685134	0.691564148
380	1	0	1	1	1	0.826086957	0.173913043	0.967741935	0.845070423	0.902255639	0.933491236	0.066508764	0.659681475	0.726685134	0.691564148
380	1	0	1	1	1	0.826086957	0.173913043	0.967741935	0.845070423	0.902255639	0.933491236	0.066508764	0.659681475	0.726685134	0.691564148
380	1	0	1	1	1	0.826086957	0.173913043	0.967741935	0.845070423	0.902255639	0.933491236	0.066508764	0.659681475	0.726685134	0.691564148
380	1	0	1	1	1	0.826086957	0.173913043	0.967741935	0.845070423	0.902255639	0.933491236	0.066508764	0.659681475	0.726685134	0.691564148
380	1	0	1	1	1	0.826086957	0.173913043	0.967741935	0.845070423	0.902255639	0.933491236	0.066508764	0.659681475	0.726685134	0.691564148
380	1	0	1	1	1	0.826086957	0.173913043	0.967741935	0.845070423	0.902255639	0.933491236	0.066508764	0.659681475	0.726685134	0.691564148
380	1	0	1	1	1	0.826086957	0.173913043	0.967741935	0.845070423	0.902255639	0.933491236	0.066508764	0.659681475	0.726685134	0.691564148
380	1	0	1	1	1	0.826086957	0.173913043	0.967741935	0.845070423	0.902255639	0.933491236	0.066508764	0.659681475	0.726685134	0.691564148
380	1	0	1	1	1	0.826086957	0.173913043	0.967741935	0.845070423	0.902255639	0.933491236	0.066508764	0.659681475	0.726685134	0.691564148
380	1	0	1	1	1	0.826086957	0.173913043	0.967741935	0.845070423	0.902255639	0.933491236	0.066508764	0.659681475	0.726685134	0.691564148
380	1	0	1	1	1	0.826086957	0.173913043	0.967741935	0.845070423	0.902255639	0.933491236	0.066508764	0.659681475	0.726685134	0.691564148
380	1	0	1	1	1	0.826086957	0.173913043	0.967741935	0.845070423	0.902255639	0.933491236	0.066508764	0.659681475	0.726685134	0.691564148
380	1	0	1	1	1	0.826086957	0.173913043	0.967741935	0.845070423	0.902255639	0.933491236	0.066508764	0.659681475	0.726685134	0.691564148
380	1	0	1	1	1	0.826086957	0.173913043	0.967741935	0.845070423	0.902255639	0.933491236	0.066508764	0.659681475	0.726685134	0.691564148
380	1	0	1	1	1	0.826086957	0.173913043	0.967741935	0.845070423	0.902255639	0.933491236	0.066508764	0.659681475	0.726685134	0.691564148
380	1	0	1	1	1	0.826086957	0.173913043	0.967741935	0.845070423	0.902255639	0.933491236	0.066508764	0.659681475	0.726685134	0.691564148
380	1	0	1	1	1	0.826086957	0.173913043	0.967741935	0.845070423	0.902255639	0.933491236	0.066508764	0.659681475	0.726685134	0.691564148
380	1	0	1	1	1	0.826086957	0.173913043	0.967741935	0.845070423	0.902255639	0.933491236	0.066508764	0.659681475	0.726685134	0.691564148
380	1	0	1	1	1	0.826086957	0.173913043	0.967741935	0.845070423	0.902255639	0.933491236	0.066508764	0.659681475	0.726685134	0.691564148
380	1	0	1	1	1	0.826086957	0.173913043	0.967741935	0.845070423	0.902255639	0.933491236	0.066508764	0.659681475	0.726685134	0.691564148
380	1	0	1	1	1	0.826086957	0.173913043	0.967741935	0.845070423	0.902255639	0.933491236	0.066508764	0.659681475	0.726685134	0.691564148
380	1	0	1	1	1	0.826086957	0.173913043	0.967741935	0.845070423	0.902255639	0.933491236	0.066508764	0.659681475	0.726685134	0.691564148
380	1	0	1	1	1	0.826086957	0.173913043	0.967741935	0.845070423	0.902255639	0.933491236	0.066508764	0.659681475	0.726685134	0.691564148
380	1	0	1	1	1	0.826086957	0.173913043	0.967741935	0.845070423	0.902255639	0.933491236	0.066508764	0.659681475	0.726685134	0.691564148
380	1	0	1	1	1	0.826086957	0.173913043	0.967741935	0.845070423	0.902255639	0.933491236	0.066508764	0.659681475	0.726685134	0.691564148
380	1	0	1	1	1	0.826086957	0.173913043	0.967741935	0.845070423	0.902255639	0.933491236	0.066508764	0.659681475	0.726685134	0.691564148
380	1	0	1	1	1	0.826086957	0.173913043	0.967741935	0.845070423	0.902255639	0.933491236	0.066508764	0.659681475	0.726685134	0.691564148
380	1	0	1	1	1	0.826086957	0.173913043	0.967741935	0.845070423	0.902255639	0.933491236	0.066508764	0.659681475	0.726685134	0.691564148
380	1	0	1	1	1	0.826086957	0.173913043	0.967741935	0.845070423	0.902255639	0.933491236	0.066508764	0.659681475	0.726685134	0.691564148
380	1	0	1	1	1	0.826086957	0.173913043	0.967741935	0.845070423	0.902255639	0.933491236	0.066508764	0.659681475	0.726685134	0.691564148
380	1	0	1	1	1	0.826086957	0.173913043	0.967741935	0.845070423	0.902255639	0.933491236	0.066508764	0.659681475	0.726685134	0.691564148
380	1	0	1	1	1	0.826086957	0.173913043	0.967741935	0.845070423	0.902255639	0.933491236	0.066508764	0.659681475	0.726685134	0.691564148
380	1	0	1	1	1	0.826086957	0.173913043	0.967741935	0.845070423	0.902255639	0.933491236	0.066508764	0.659681475	0.726685134	0.691564148
380	1	0	1	1	1	0.826086957	0.173913043	0.967741935	0.845070423	0.902255639	0.933491236	0.066508764	0.659681475	0.726685134	0.691564148
380	1	0	1	1	1	0.826086957	0.173913043	0.967741935	0.845070423	0.902255639	0.933491236	0.066508764	0.659681475	0.726685134	0.691564148
380	1	0	1	1	1	0.826086957	0.173913043	0.967741935	0.845070423	0.902255639	0.933491236	0.066508764	0.659681475	0.726685134	0.691564148
380	1	0	1	1	1	0.826086957	0.173913043	0.967741935	0.845070423	0.902255639	0.933491236	0.066508764	0.659681475	0.726685134	0.691564148
380	1	0	1	1	1	0.826086957	0.173913043	0.967741935	0.845070423	0.902255639	0.933491236	0.066508764	0.659681475	0.726685134	0.691564148
380	1	0	1	1	1	0.826086957	0.173913043	0.967741935	0.845070423	0.902255639	0.933491236	0.066508764	0.659681475	0.726685134	0.691564148
380	1	0	1	1	1	0.826086957	0.173913043	0.967741935	0.845070423	0.902255639	0.933491236	0.066508764	0.659681475	0.726685134	0.691564148
380	1	0	1	1	1	0.826086957	0.173913043	0.967741935	0.845070423	0.902255639	0.933491236	0.066508764	0.659681475	0.726685134	0.691564148
380	1	0	1	1	1	0.826086957	0.173913043	0.967741935	0.845070423	0.902255639	0.933491236	0.066508764	0.659681475	0.726685134	0.691564148
380	1	0	1	1	1	0.826086957	0.173913043	0.967741935	0.845070423	0.902255639	0.933491236	0.066508764	0.659681475	0.726685134	0.691564148
380	1	0	1	1	1	0.826086957	0.173913043	0.967741935	0.845070423	0.902255639	0.933491236	0.066508764	0.659681475	0.726685134	0.691564148
380	1	0	1	1	1	0.826086957	0.173913043	0.967741935	0.845070423	0.902255639	0.933491236	0.066508764	0.659681475	0.726685134	0.691564148
380	1	0	1	1	1	0.826086957	0.173913043	0.967741935	0.845070423	0.902255639	0.933491236	0.066508764	0.659681475	0.726685134	0.691564148
380	1	0	1	1	1	0.826086957	0.173913043	0.967741935	0.845070423	0.902255639	0.933491236	0.066508764	0.659681475	0.726685134	0.691564148
380	1	0	1	1	1	0.826086957	0.173913043	0.967741935	0.845070423	0.902255639	0.933491236	0.066508764	0.659681475	0.726685134	0.691564148
380	1	0	1	1	1	0.826086957	0.173913043	0.967741935	0.845070423	0.902255639	0.933491236	0.066508764	0.659681475	0.726685134	0.691564148
380	1	0	1	1	1	0.826086957	0.173913043	0.967741935	0.845070423	0.902255639	0.933491236	0.066508764	0.659681475	0.726685134	0.691564148
380	1	0	1	1	1	0.826086957	0.173913043	0.967741935	0.845070423	0.902255639	0.933491236	0.066508764	0.659681475	0.726685134	0.691564148
380	1	0	1	1	1	0.826086957	0.173913043	0.967741935	0.845070423	0.902255639	0.933491236	0.066508764	0.659681475	0.726685134	0.691564148
380	1	0	1	1	1	0.826086957	0.173913043	0.967741935	0.845070423	0.902255639	0.933491236	0.066508764	0.659681475	0.726685134	0.691564148
380	1	0	1	1	1	0.826086957	0.173913043	0.967741935	0.845070423	0.902255639	0.933491236	0.066508764	0.659681475	0.726685134	0.691564148
380	1	0	1	1	1	0.826086957	0.173913043	0.967741935	0.845070423	0.902255639	0.933491236	0.066508764	0.659681475	0.726685134	0.691564148
380	1	0	1	1	1	0.826086957	0.173913043	0.967741935	0.845070423	0.902255639	0.933491236	0.066508764	0.659681475	0.726685134	0.691564148
380	1	0	1	1	1	0.826086957	0.173913043	0.967741935	0.845070423	0.902255639	0.933491236	0.066508764	0.659681475	0.726685134	0.691564148
380	1	0	1	1	1	0.826086957	0.173913043	0.967741935	0.845070423	0.902255639	0.933491236	0.066508764	0.659681475	0.726685134	0.691564148
380	1	0	1	1	1	0.826086957	0.173913043	0.967741935	0.845070423	0.902255639	0.933491236	0.066508764	0.659681475	0.726685134	0.691564148
380	1	0	1	1	1	0.826086957	0.173913043	0.967741935	0.845070423	0.902255639	0.933491236	0.066508764	0.659681475	0.726685134	0.691564148
380	1	0	1	1	1	0.826086957	0.173913043	0.967741935	0.845070423	0.902255639	0.933491236	0.066508764	0.659681475	0.726685134	0.691564148
