# Supplementary material for: An Improved Hybrid Feature Selection Algorithm for Electric Charge Recovery Risk
Source: Hindawi journal article supplement (doi:10.1155/2020/8479341), 2020-08-28
Supplement: f1 [file 8479341.f1.zip › 8479341.f1/Experimental Results/201807/BGWO_results.csv]

features_num	Accuracy_high	Loss_high	Precission_high	Recall_high	F1_high	Accuracy_med	Loss_med	Precission_med	Recall_med	F1_med	Accuracy_low	Loss_low	Precission_low	Recall_low	F1_low
294	1.0	0.0	1.0	1.0	1.0	0.8531571218795888	0.1468428781204112	0.9712837837837838	0.8738601823708206	0.9199999999999999	0.9332218725413061	0.06677812745869394	0.5109553023663453	0.828125	0.6319783197831979
294	1.0	0.0	1.0	1.0	1.0	0.8531571218795888	0.1468428781204112	0.9712837837837838	0.8738601823708206	0.9199999999999999	0.9332218725413061	0.06677812745869394	0.5109553023663453	0.828125	0.6319783197831979
294	1.0	0.0	1.0	1.0	1.0	0.8531571218795888	0.1468428781204112	0.9712837837837838	0.8738601823708206	0.9199999999999999	0.9332218725413061	0.06677812745869394	0.5109553023663453	0.828125	0.6319783197831979
294	1.0	0.0	1.0	1.0	1.0	0.8531571218795888	0.1468428781204112	0.9712837837837838	0.8738601823708206	0.9199999999999999	0.9332218725413061	0.06677812745869394	0.5109553023663453	0.828125	0.6319783197831979
294	1.0	0.0	1.0	1.0	1.0	0.8531571218795888	0.1468428781204112	0.9712837837837838	0.8738601823708206	0.9199999999999999	0.9332218725413061	0.06677812745869394	0.5109553023663453	0.828125	0.6319783197831979
294	1.0	0.0	1.0	1.0	1.0	0.8531571218795888	0.1468428781204112	0.9712837837837838	0.8738601823708206	0.9199999999999999	0.9332218725413061	0.06677812745869394	0.5109553023663453	0.828125	0.6319783197831979
294	1.0	0.0	1.0	1.0	1.0	0.8531571218795888	0.1468428781204112	0.9712837837837838	0.8738601823708206	0.9199999999999999	0.9332218725413061	0.06677812745869394	0.5109553023663453	0.828125	0.6319783197831979
294	1.0	0.0	1.0	1.0	1.0	0.8531571218795888	0.1468428781204112	0.9712837837837838	0.8738601823708206	0.9199999999999999	0.9332218725413061	0.06677812745869394	0.5109553023663453	0.828125	0.6319783197831979
294	1.0	0.0	1.0	1.0	1.0	0.8531571218795888	0.1468428781204112	0.9712837837837838	0.8738601823708206	0.9199999999999999	0.9332218725413061	0.06677812745869394	0.5109553023663453	0.828125	0.6319783197831979
294	1.0	0.0	1.0	1.0	1.0	0.8531571218795888	0.1468428781204112	0.9712837837837838	0.8738601823708206	0.9199999999999999	0.9332218725413061	0.06677812745869394	0.5109553023663453	0.828125	0.6319783197831979
294	1.0	0.0	1.0	1.0	1.0	0.8531571218795888	0.1468428781204112	0.9712837837837838	0.8738601823708206	0.9199999999999999	0.9332218725413061	0.06677812745869394	0.5109553023663453	0.828125	0.6319783197831979
337	1.0	0.0	1.0	1.0	1.0	0.8381924198250729	0.16180758017492713	0.9964349376114082	0.8368263473053892	0.9096826688364523	0.9471716674864732	0.05282833251352681	0.5765158806544755	0.860632183908046	0.6904899135446686
337	1.0	0.0	1.0	1.0	1.0	0.8381924198250729	0.16180758017492713	0.9964349376114082	0.8368263473053892	0.9096826688364523	0.9471716674864732	0.05282833251352681	0.5765158806544755	0.860632183908046	0.6904899135446686
337	1.0	0.0	1.0	1.0	1.0	0.8381924198250729	0.16180758017492713	0.9964349376114082	0.8368263473053892	0.9096826688364523	0.9471716674864732	0.05282833251352681	0.5765158806544755	0.860632183908046	0.6904899135446686
337	1.0	0.0	1.0	1.0	1.0	0.8381924198250729	0.16180758017492713	0.9964349376114082	0.8368263473053892	0.9096826688364523	0.9471716674864732	0.05282833251352681	0.5765158806544755	0.860632183908046	0.6904899135446686
337	1.0	0.0	1.0	1.0	1.0	0.8381924198250729	0.16180758017492713	0.9964349376114082	0.8368263473053892	0.9096826688364523	0.9471716674864732	0.05282833251352681	0.5765158806544755	0.860632183908046	0.6904899135446686
337	1.0	0.0	1.0	1.0	1.0	0.8381924198250729	0.16180758017492713	0.9964349376114082	0.8368263473053892	0.9096826688364523	0.9471716674864732	0.05282833251352681	0.5765158806544755	0.860632183908046	0.6904899135446686
337	1.0	0.0	1.0	1.0	1.0	0.8381924198250729	0.16180758017492713	0.9964349376114082	0.8368263473053892	0.9096826688364523	0.9471716674864732	0.05282833251352681	0.5765158806544755	0.860632183908046	0.6904899135446686
337	1.0	0.0	1.0	1.0	1.0	0.8381924198250729	0.16180758017492713	0.9964349376114082	0.8368263473053892	0.9096826688364523	0.9471716674864732	0.05282833251352681	0.5765158806544755	0.860632183908046	0.6904899135446686
337	1.0	0.0	1.0	1.0	1.0	0.8381924198250729	0.16180758017492713	0.9964349376114082	0.8368263473053892	0.9096826688364523	0.9471716674864732	0.05282833251352681	0.5765158806544755	0.860632183908046	0.6904899135446686
337	1.0	0.0	1.0	1.0	1.0	0.8381924198250729	0.16180758017492713	0.9964349376114082	0.8368263473053892	0.9096826688364523	0.9471716674864732	0.05282833251352681	0.5765158806544755	0.860632183908046	0.6904899135446686
337	1.0	0.0	1.0	1.0	1.0	0.8381924198250729	0.16180758017492713	0.9964349376114082	0.8368263473053892	0.9096826688364523	0.9471716674864732	0.05282833251352681	0.5765158806544755	0.860632183908046	0.6904899135446686
337	1.0	0.0	1.0	1.0	1.0	0.8381924198250729	0.16180758017492713	0.9964349376114082	0.8368263473053892	0.9096826688364523	0.9471716674864732	0.05282833251352681	0.5765158806544755	0.860632183908046	0.6904899135446686
337	1.0	0.0	1.0	1.0	1.0	0.8381924198250729	0.16180758017492713	0.9964349376114082	0.8368263473053892	0.9096826688364523	0.9471716674864732	0.05282833251352681	0.5765158806544755	0.860632183908046	0.6904899135446686
337	1.0	0.0	1.0	1.0	1.0	0.8381924198250729	0.16180758017492713	0.9964349376114082	0.8368263473053892	0.9096826688364523	0.9471716674864732	0.05282833251352681	0.5765158806544755	0.860632183908046	0.6904899135446686
337	1.0	0.0	1.0	1.0	1.0	0.8381924198250729	0.16180758017492713	0.9964349376114082	0.8368263473053892	0.9096826688364523	0.9471716674864732	0.05282833251352681	0.5765158806544755	0.860632183908046	0.6904899135446686
337	1.0	0.0	1.0	1.0	1.0	0.8381924198250729	0.16180758017492713	0.9964349376114082	0.8368263473053892	0.9096826688364523	0.9471716674864732	0.05282833251352681	0.5765158806544755	0.860632183908046	0.6904899135446686
337	1.0	0.0	1.0	1.0	1.0	0.8381924198250729	0.16180758017492713	0.9964349376114082	0.8368263473053892	0.9096826688364523	0.9471716674864732	0.05282833251352681	0.5765158806544755	0.860632183908046	0.6904899135446686
337	1.0	0.0	1.0	1.0	1.0	0.8381924198250729	0.16180758017492713	0.9964349376114082	0.8368263473053892	0.9096826688364523	0.9471716674864732	0.05282833251352681	0.5765158806544755	0.860632183908046	0.6904899135446686
337	1.0	0.0	1.0	1.0	1.0	0.8381924198250729	0.16180758017492713	0.9964349376114082	0.8368263473053892	0.9096826688364523	0.9471716674864732	0.05282833251352681	0.5765158806544755	0.860632183908046	0.6904899135446686
337	1.0	0.0	1.0	1.0	1.0	0.8381924198250729	0.16180758017492713	0.9964349376114082	0.8368263473053892	0.9096826688364523	0.9471716674864732	0.05282833251352681	0.5765158806544755	0.860632183908046	0.6904899135446686
337	1.0	0.0	1.0	1.0	1.0	0.8381924198250729	0.16180758017492713	0.9964349376114082	0.8368263473053892	0.9096826688364523	0.9471716674864732	0.05282833251352681	0.5765158806544755	0.860632183908046	0.6904899135446686
337	1.0	0.0	1.0	1.0	1.0	0.8381924198250729	0.16180758017492713	0.9964349376114082	0.8368263473053892	0.9096826688364523	0.9471716674864732	0.05282833251352681	0.5765158806544755	0.860632183908046	0.6904899135446686
337	1.0	0.0	1.0	1.0	1.0	0.8381924198250729	0.16180758017492713	0.9964349376114082	0.8368263473053892	0.9096826688364523	0.9471716674864732	0.05282833251352681	0.5765158806544755	0.860632183908046	0.6904899135446686
337	1.0	0.0	1.0	1.0	1.0	0.8381924198250729	0.16180758017492713	0.9964349376114082	0.8368263473053892	0.9096826688364523	0.9471716674864732	0.05282833251352681	0.5765158806544755	0.860632183908046	0.6904899135446686
337	1.0	0.0	1.0	1.0	1.0	0.8381924198250729	0.16180758017492713	0.9964349376114082	0.8368263473053892	0.9096826688364523	0.9471716674864732	0.05282833251352681	0.5765158806544755	0.860632183908046	0.6904899135446686
337	1.0	0.0	1.0	1.0	1.0	0.8381924198250729	0.16180758017492713	0.9964349376114082	0.8368263473053892	0.9096826688364523	0.9471716674864732	0.05282833251352681	0.5765158806544755	0.860632183908046	0.6904899135446686
337	1.0	0.0	1.0	1.0	1.0	0.8381924198250729	0.16180758017492713	0.9964349376114082	0.8368263473053892	0.9096826688364523	0.9471716674864732	0.05282833251352681	0.5765158806544755	0.860632183908046	0.6904899135446686
337	1.0	0.0	1.0	1.0	1.0	0.8381924198250729	0.16180758017492713	0.9964349376114082	0.8368263473053892	0.9096826688364523	0.9471716674864732	0.05282833251352681	0.5765158806544755	0.860632183908046	0.6904899135446686
337	1.0	0.0	1.0	1.0	1.0	0.8381924198250729	0.16180758017492713	0.9964349376114082	0.8368263473053892	0.9096826688364523	0.9471716674864732	0.05282833251352681	0.5765158806544755	0.860632183908046	0.6904899135446686
337	1.0	0.0	1.0	1.0	1.0	0.8381924198250729	0.16180758017492713	0.9964349376114082	0.8368263473053892	0.9096826688364523	0.9471716674864732	0.05282833251352681	0.5765158806544755	0.860632183908046	0.6904899135446686
337	1.0	0.0	1.0	1.0	1.0	0.8381924198250729	0.16180758017492713	0.9964349376114082	0.8368263473053892	0.9096826688364523	0.9471716674864732	0.05282833251352681	0.5765158806544755	0.860632183908046	0.6904899135446686
337	1.0	0.0	1.0	1.0	1.0	0.8381924198250729	0.16180758017492713	0.9964349376114082	0.8368263473053892	0.9096826688364523	0.9471716674864732	0.05282833251352681	0.5765158806544755	0.860632183908046	0.6904899135446686
337	1.0	0.0	1.0	1.0	1.0	0.8381924198250729	0.16180758017492713	0.9964349376114082	0.8368263473053892	0.9096826688364523	0.9471716674864732	0.05282833251352681	0.5765158806544755	0.860632183908046	0.6904899135446686
337	1.0	0.0	1.0	1.0	1.0	0.8381924198250729	0.16180758017492713	0.9964349376114082	0.8368263473053892	0.9096826688364523	0.9471716674864732	0.05282833251352681	0.5765158806544755	0.860632183908046	0.6904899135446686
337	1.0	0.0	1.0	1.0	1.0	0.8381924198250729	0.16180758017492713	0.9964349376114082	0.8368263473053892	0.9096826688364523	0.9471716674864732	0.05282833251352681	0.5765158806544755	0.860632183908046	0.6904899135446686
337	1.0	0.0	1.0	1.0	1.0	0.8381924198250729	0.16180758017492713	0.9964349376114082	0.8368263473053892	0.9096826688364523	0.9471716674864732	0.05282833251352681	0.5765158806544755	0.860632183908046	0.6904899135446686
337	1.0	0.0	1.0	1.0	1.0	0.8381924198250729	0.16180758017492713	0.9964349376114082	0.8368263473053892	0.9096826688364523	0.9471716674864732	0.05282833251352681	0.5765158806544755	0.860632183908046	0.6904899135446686
337	1.0	0.0	1.0	1.0	1.0	0.8381924198250729	0.16180758017492713	0.9964349376114082	0.8368263473053892	0.9096826688364523	0.9471716674864732	0.05282833251352681	0.5765158806544755	0.860632183908046	0.6904899135446686
337	1.0	0.0	1.0	1.0	1.0	0.8381924198250729	0.16180758017492713	0.9964349376114082	0.8368263473053892	0.9096826688364523	0.9471716674864732	0.05282833251352681	0.5765158806544755	0.860632183908046	0.6904899135446686
337	1.0	0.0	1.0	1.0	1.0	0.8381924198250729	0.16180758017492713	0.9964349376114082	0.8368263473053892	0.9096826688364523	0.9471716674864732	0.05282833251352681	0.5765158806544755	0.860632183908046	0.6904899135446686
337	1.0	0.0	1.0	1.0	1.0	0.8381924198250729	0.16180758017492713	0.9964349376114082	0.8368263473053892	0.9096826688364523	0.9471716674864732	0.05282833251352681	0.5765158806544755	0.860632183908046	0.6904899135446686
337	1.0	0.0	1.0	1.0	1.0	0.8381924198250729	0.16180758017492713	0.9964349376114082	0.8368263473053892	0.9096826688364523	0.9471716674864732	0.05282833251352681	0.5765158806544755	0.860632183908046	0.6904899135446686
337	1.0	0.0	1.0	1.0	1.0	0.8381924198250729	0.16180758017492713	0.9964349376114082	0.8368263473053892	0.9096826688364523	0.9471716674864732	0.05282833251352681	0.5765158806544755	0.860632183908046	0.6904899135446686
337	1.0	0.0	1.0	1.0	1.0	0.8381924198250729	0.16180758017492713	0.9964349376114082	0.8368263473053892	0.9096826688364523	0.9471716674864732	0.05282833251352681	0.5765158806544755	0.860632183908046	0.6904899135446686
337	1.0	0.0	1.0	1.0	1.0	0.8381924198250729	0.16180758017492713	0.9964349376114082	0.8368263473053892	0.9096826688364523	0.9471716674864732	0.05282833251352681	0.5765158806544755	0.860632183908046	0.6904899135446686
337	1.0	0.0	1.0	1.0	1.0	0.8381924198250729	0.16180758017492713	0.9964349376114082	0.8368263473053892	0.9096826688364523	0.9471716674864732	0.05282833251352681	0.5765158806544755	0.860632183908046	0.6904899135446686
337	1.0	0.0	1.0	1.0	1.0	0.8381924198250729	0.16180758017492713	0.9964349376114082	0.8368263473053892	0.9096826688364523	0.9471716674864732	0.05282833251352681	0.5765158806544755	0.860632183908046	0.6904899135446686
337	1.0	0.0	1.0	1.0	1.0	0.8381924198250729	0.16180758017492713	0.9964349376114082	0.8368263473053892	0.9096826688364523	0.9471716674864732	0.05282833251352681	0.5765158806544755	0.860632183908046	0.6904899135446686
337	1.0	0.0	1.0	1.0	1.0	0.8381924198250729	0.16180758017492713	0.9964349376114082	0.8368263473053892	0.9096826688364523	0.9471716674864732	0.05282833251352681	0.5765158806544755	0.860632183908046	0.6904899135446686
337	1.0	0.0	1.0	1.0	1.0	0.8381924198250729	0.16180758017492713	0.9964349376114082	0.8368263473053892	0.9096826688364523	0.9471716674864732	0.05282833251352681	0.5765158806544755	0.860632183908046	0.6904899135446686
337	1.0	0.0	1.0	1.0	1.0	0.8381924198250729	0.16180758017492713	0.9964349376114082	0.8368263473053892	0.9096826688364523	0.9471716674864732	0.05282833251352681	0.5765158806544755	0.860632183908046	0.6904899135446686
337	1.0	0.0	1.0	1.0	1.0	0.8381924198250729	0.16180758017492713	0.9964349376114082	0.8368263473053892	0.9096826688364523	0.9471716674864732	0.05282833251352681	0.5765158806544755	0.860632183908046	0.6904899135446686
337	1.0	0.0	1.0	1.0	1.0	0.8381924198250729	0.16180758017492713	0.9964349376114082	0.8368263473053892	0.9096826688364523	0.9471716674864732	0.05282833251352681	0.5765158806544755	0.860632183908046	0.6904899135446686
337	1.0	0.0	1.0	1.0	1.0	0.8381924198250729	0.16180758017492713	0.9964349376114082	0.8368263473053892	0.9096826688364523	0.9471716674864732	0.05282833251352681	0.5765158806544755	0.860632183908046	0.6904899135446686
337	1.0	0.0	1.0	1.0	1.0	0.8381924198250729	0.16180758017492713	0.9964349376114082	0.8368263473053892	0.9096826688364523	0.9471716674864732	0.05282833251352681	0.5765158806544755	0.860632183908046	0.6904899135446686
337	1.0	0.0	1.0	1.0	1.0	0.8381924198250729	0.16180758017492713	0.9964349376114082	0.8368263473053892	0.9096826688364523	0.9471716674864732	0.05282833251352681	0.5765158806544755	0.860632183908046	0.6904899135446686
337	1.0	0.0	1.0	1.0	1.0	0.8381924198250729	0.16180758017492713	0.9964349376114082	0.8368263473053892	0.9096826688364523	0.9471716674864732	0.05282833251352681	0.5765158806544755	0.860632183908046	0.6904899135446686
337	1.0	0.0	1.0	1.0	1.0	0.8381924198250729	0.16180758017492713	0.9964349376114082	0.8368263473053892	0.9096826688364523	0.9471716674864732	0.05282833251352681	0.5765158806544755	0.860632183908046	0.6904899135446686
337	1.0	0.0	1.0	1.0	1.0	0.8381924198250729	0.16180758017492713	0.9964349376114082	0.8368263473053892	0.9096826688364523	0.9471716674864732	0.05282833251352681	0.5765158806544755	0.860632183908046	0.6904899135446686
337	1.0	0.0	1.0	1.0	1.0	0.8381924198250729	0.16180758017492713	0.9964349376114082	0.8368263473053892	0.9096826688364523	0.9471716674864732	0.05282833251352681	0.5765158806544755	0.860632183908046	0.6904899135446686
337	1.0	0.0	1.0	1.0	1.0	0.8381924198250729	0.16180758017492713	0.9964349376114082	0.8368263473053892	0.9096826688364523	0.9471716674864732	0.05282833251352681	0.5765158806544755	0.860632183908046	0.6904899135446686
337	1.0	0.0	1.0	1.0	1.0	0.8381924198250729	0.16180758017492713	0.9964349376114082	0.8368263473053892	0.9096826688364523	0.9471716674864732	0.05282833251352681	0.5765158806544755	0.860632183908046	0.6904899135446686
337	1.0	0.0	1.0	1.0	1.0	0.8381924198250729	0.16180758017492713	0.9964349376114082	0.8368263473053892	0.9096826688364523	0.9471716674864732	0.05282833251352681	0.5765158806544755	0.860632183908046	0.6904899135446686
337	1.0	0.0	1.0	1.0	1.0	0.8381924198250729	0.16180758017492713	0.9964349376114082	0.8368263473053892	0.9096826688364523	0.9471716674864732	0.05282833251352681	0.5765158806544755	0.860632183908046	0.6904899135446686
337	1.0	0.0	1.0	1.0	1.0	0.8381924198250729	0.16180758017492713	0.9964349376114082	0.8368263473053892	0.9096826688364523	0.9471716674864732	0.05282833251352681	0.5765158806544755	0.860632183908046	0.6904899135446686
337	1.0	0.0	1.0	1.0	1.0	0.8381924198250729	0.16180758017492713	0.9964349376114082	0.8368263473053892	0.9096826688364523	0.9471716674864732	0.05282833251352681	0.5765158806544755	0.860632183908046	0.6904899135446686
337	1.0	0.0	1.0	1.0	1.0	0.8381924198250729	0.16180758017492713	0.9964349376114082	0.8368263473053892	0.9096826688364523	0.9471716674864732	0.05282833251352681	0.5765158806544755	0.860632183908046	0.6904899135446686
337	1.0	0.0	1.0	1.0	1.0	0.8381924198250729	0.16180758017492713	0.9964349376114082	0.8368263473053892	0.9096826688364523	0.9471716674864732	0.05282833251352681	0.5765158806544755	0.860632183908046	0.6904899135446686
337	1.0	0.0	1.0	1.0	1.0	0.8381924198250729	0.16180758017492713	0.9964349376114082	0.8368263473053892	0.9096826688364523	0.9471716674864732	0.05282833251352681	0.5765158806544755	0.860632183908046	0.6904899135446686
337	1.0	0.0	1.0	1.0	1.0	0.8381924198250729	0.16180758017492713	0.9964349376114082	0.8368263473053892	0.9096826688364523	0.9471716674864732	0.05282833251352681	0.5765158806544755	0.860632183908046	0.6904899135446686
337	1.0	0.0	1.0	1.0	1.0	0.8381924198250729	0.16180758017492713	0.9964349376114082	0.8368263473053892	0.9096826688364523	0.9471716674864732	0.05282833251352681	0.5765158806544755	0.860632183908046	0.6904899135446686
337	1.0	0.0	1.0	1.0	1.0	0.8381924198250729	0.16180758017492713	0.9964349376114082	0.8368263473053892	0.9096826688364523	0.9471716674864732	0.05282833251352681	0.5765158806544755	0.860632183908046	0.6904899135446686
337	1.0	0.0	1.0	1.0	1.0	0.8381924198250729	0.16180758017492713	0.9964349376114082	0.8368263473053892	0.9096826688364523	0.9471716674864732	0.05282833251352681	0.5765158806544755	0.860632183908046	0.6904899135446686
337	1.0	0.0	1.0	1.0	1.0	0.8381924198250729	0.16180758017492713	0.9964349376114082	0.8368263473053892	0.9096826688364523	0.9471716674864732	0.05282833251352681	0.5765158806544755	0.860632183908046	0.6904899135446686
366	1.0	0.0	1.0	1.0	1.0	0.8845070422535212	0.11549295774647883	1.0	0.8836879432624114	0.9382530120481928	0.9510006901311249	0.04899930986887513	0.596244131455399	0.7685325264750378	0.6715135492399207
366	1.0	0.0	1.0	1.0	1.0	0.8845070422535212	0.11549295774647883	1.0	0.8836879432624114	0.9382530120481928	0.9510006901311249	0.04899930986887513	0.596244131455399	0.7685325264750378	0.6715135492399207
366	1.0	0.0	1.0	1.0	1.0	0.8845070422535212	0.11549295774647883	1.0	0.8836879432624114	0.9382530120481928	0.9510006901311249	0.04899930986887513	0.596244131455399	0.7685325264750378	0.6715135492399207
366	1.0	0.0	1.0	1.0	1.0	0.8845070422535212	0.11549295774647883	1.0	0.8836879432624114	0.9382530120481928	0.9510006901311249	0.04899930986887513	0.596244131455399	0.7685325264750378	0.6715135492399207
366	1.0	0.0	1.0	1.0	1.0	0.8845070422535212	0.11549295774647883	1.0	0.8836879432624114	0.9382530120481928	0.9510006901311249	0.04899930986887513	0.596244131455399	0.7685325264750378	0.6715135492399207
366	1.0	0.0	1.0	1.0	1.0	0.8845070422535212	0.11549295774647883	1.0	0.8836879432624114	0.9382530120481928	0.9510006901311249	0.04899930986887513	0.596244131455399	0.7685325264750378	0.6715135492399207
333	1.0	0.0	1.0	1.0	1.0	0.8596774193548387	0.14032258064516134	1.0	0.8594507269789984	0.9244135534317984	0.9577877662692984	0.0422122337307016	0.6850117096018735	0.7820855614973262	0.7303370786516853
333	1.0	0.0	1.0	1.0	1.0	0.8596774193548387	0.14032258064516134	1.0	0.8594507269789984	0.9244135534317984	0.9577877662692984	0.0422122337307016	0.6850117096018735	0.7820855614973262	0.7303370786516853
333	1.0	0.0	1.0	1.0	1.0	0.8596774193548387	0.14032258064516134	1.0	0.8594507269789984	0.9244135534317984	0.9577877662692984	0.0422122337307016	0.6850117096018735	0.7820855614973262	0.7303370786516853
333	1.0	0.0	1.0	1.0	1.0	0.8596774193548387	0.14032258064516134	1.0	0.8594507269789984	0.9244135534317984	0.9577877662692984	0.0422122337307016	0.6850117096018735	0.7820855614973262	0.7303370786516853
333	1.0	0.0	1.0	1.0	1.0	0.8596774193548387	0.14032258064516134	1.0	0.8594507269789984	0.9244135534317984	0.9577877662692984	0.0422122337307016	0.6850117096018735	0.7820855614973262	0.7303370786516853
333	1.0	0.0	1.0	1.0	1.0	0.8596774193548387	0.14032258064516134	1.0	0.8594507269789984	0.9244135534317984	0.9577877662692984	0.0422122337307016	0.6850117096018735	0.7820855614973262	0.7303370786516853
333	1.0	0.0	1.0	1.0	1.0	0.8596774193548387	0.14032258064516134	1.0	0.8594507269789984	0.9244135534317984	0.9577877662692984	0.0422122337307016	0.6850117096018735	0.7820855614973262	0.7303370786516853
333	1.0	0.0	1.0	1.0	1.0	0.8596774193548387	0.14032258064516134	1.0	0.8594507269789984	0.9244135534317984	0.9577877662692984	0.0422122337307016	0.6850117096018735	0.7820855614973262	0.7303370786516853
333	1.0	0.0	1.0	1.0	1.0	0.8596774193548387	0.14032258064516134	1.0	0.8594507269789984	0.9244135534317984	0.9577877662692984	0.0422122337307016	0.6850117096018735	0.7820855614973262	0.7303370786516853
