# Supplementary material for: An Improved Hybrid Feature Selection Algorithm for Electric Charge Recovery Risk
Source: Hindawi journal article supplement (doi:10.1155/2020/8479341), 2020-08-28
Supplement: f1 [file 8479341.f1.zip › 8479341.f1/Experimental Results/201807/BGWO_SBS_results.csv]

features_num	Accuracy_high	Loss_high	Precission_high	Recall_high	F1_high	Accuracy_med	Loss_med	Precission_med	Recall_med	F1_med	Accuracy_low	Loss_low	Precission_low	Recall_low	F1_low
333	1	0	1	1	1	0.856451613	0.143548387	1	0.856219709	0.92254134	0.957983193	0.042016807	0.686619718	0.782085561	0.73125
333	1	0	1	1	1	0.856451613	0.143548387	1	0.856219709	0.92254134	0.957983193	0.042016807	0.686619718	0.782085561	0.73125
333	1	0	1	1	1	0.856451613	0.143548387	1	0.856219709	0.92254134	0.957983193	0.042016807	0.686619718	0.782085561	0.73125
332	1	0	1	1	1	0.854304636	0.145695364	1	0.854304636	0.921428571	0.958731707	0.041268293	0.699063232	0.782437746	0.738404453
332	1	0	1	1	1	0.854304636	0.145695364	1	0.854304636	0.921428571	0.958731707	0.041268293	0.699063232	0.782437746	0.738404453
332	1	0	1	1	1	0.854304636	0.145695364	1	0.854304636	0.921428571	0.958731707	0.041268293	0.699063232	0.782437746	0.738404453
332	1	0	1	1	1	0.854304636	0.145695364	1	0.854304636	0.921428571	0.958731707	0.041268293	0.699063232	0.782437746	0.738404453
332	1	0	1	1	1	0.854304636	0.145695364	1	0.854304636	0.921428571	0.958731707	0.041268293	0.699063232	0.782437746	0.738404453
331	1	0	1	1	1	0.858096828	0.141903172	1	0.858096828	0.923629829	0.958849342	0.041150658	0.702102804	0.782552083	0.740147783
331	1	0	1	1	1	0.858096828	0.141903172	1	0.858096828	0.923629829	0.958849342	0.041150658	0.702102804	0.782552083	0.740147783
331	1	0	1	1	1	0.858096828	0.141903172	1	0.858096828	0.923629829	0.958849342	0.041150658	0.702102804	0.782552083	0.740147783
331	1	0	1	1	1	0.858096828	0.141903172	1	0.858096828	0.923629829	0.958849342	0.041150658	0.702102804	0.782552083	0.740147783
331	1	0	1	1	1	0.858096828	0.141903172	1	0.858096828	0.923629829	0.958849342	0.041150658	0.702102804	0.782552083	0.740147783
331	1	0	1	1	1	0.858096828	0.141903172	1	0.858096828	0.923629829	0.958849342	0.041150658	0.702102804	0.782552083	0.740147783
331	1	0	1	1	1	0.858096828	0.141903172	1	0.858096828	0.923629829	0.958849342	0.041150658	0.702102804	0.782552083	0.740147783
331	1	0	1	1	1	0.858096828	0.141903172	1	0.858096828	0.923629829	0.958849342	0.041150658	0.702102804	0.782552083	0.740147783
331	1	0	1	1	1	0.858096828	0.141903172	1	0.858096828	0.923629829	0.958849342	0.041150658	0.702102804	0.782552083	0.740147783
331	1	0	1	1	1	0.858096828	0.141903172	1	0.858096828	0.923629829	0.958849342	0.041150658	0.702102804	0.782552083	0.740147783
331	1	0	1	1	1	0.858096828	0.141903172	1	0.858096828	0.923629829	0.958849342	0.041150658	0.702102804	0.782552083	0.740147783
331	1	0	1	1	1	0.858096828	0.141903172	1	0.858096828	0.923629829	0.958849342	0.041150658	0.702102804	0.782552083	0.740147783
331	1	0	1	1	1	0.858096828	0.141903172	1	0.858096828	0.923629829	0.958849342	0.041150658	0.702102804	0.782552083	0.740147783
331	1	0	1	1	1	0.858096828	0.141903172	1	0.858096828	0.923629829	0.958849342	0.041150658	0.702102804	0.782552083	0.740147783
331	1	0	1	1	1	0.858096828	0.141903172	1	0.858096828	0.923629829	0.958849342	0.041150658	0.702102804	0.782552083	0.740147783
331	1	0	1	1	1	0.858096828	0.141903172	1	0.858096828	0.923629829	0.958849342	0.041150658	0.702102804	0.782552083	0.740147783
331	1	0	1	1	1	0.858096828	0.141903172	1	0.858096828	0.923629829	0.958849342	0.041150658	0.702102804	0.782552083	0.740147783
331	1	0	1	1	1	0.858096828	0.141903172	1	0.858096828	0.923629829	0.958849342	0.041150658	0.702102804	0.782552083	0.740147783
331	1	0	1	1	1	0.858096828	0.141903172	1	0.858096828	0.923629829	0.958849342	0.041150658	0.702102804	0.782552083	0.740147783
331	1	0	1	1	1	0.858096828	0.141903172	1	0.858096828	0.923629829	0.958849342	0.041150658	0.702102804	0.782552083	0.740147783
331	1	0	1	1	1	0.858096828	0.141903172	1	0.858096828	0.923629829	0.958849342	0.041150658	0.702102804	0.782552083	0.740147783
331	1	0	1	1	1	0.858096828	0.141903172	1	0.858096828	0.923629829	0.958849342	0.041150658	0.702102804	0.782552083	0.740147783
331	1	0	1	1	1	0.858096828	0.141903172	1	0.858096828	0.923629829	0.958849342	0.041150658	0.702102804	0.782552083	0.740147783
331	1	0	1	1	1	0.858096828	0.141903172	1	0.858096828	0.923629829	0.958849342	0.041150658	0.702102804	0.782552083	0.740147783
331	1	0	1	1	1	0.858096828	0.141903172	1	0.858096828	0.923629829	0.958849342	0.041150658	0.702102804	0.782552083	0.740147783
331	1	0	1	1	1	0.858096828	0.141903172	1	0.858096828	0.923629829	0.958849342	0.041150658	0.702102804	0.782552083	0.740147783
331	1	0	1	1	1	0.858096828	0.141903172	1	0.858096828	0.923629829	0.958849342	0.041150658	0.702102804	0.782552083	0.740147783
331	1	0	1	1	1	0.858096828	0.141903172	1	0.858096828	0.923629829	0.958849342	0.041150658	0.702102804	0.782552083	0.740147783
331	1	0	1	1	1	0.858096828	0.141903172	1	0.858096828	0.923629829	0.958849342	0.041150658	0.702102804	0.782552083	0.740147783
331	1	0	1	1	1	0.858096828	0.141903172	1	0.858096828	0.923629829	0.958849342	0.041150658	0.702102804	0.782552083	0.740147783
331	1	0	1	1	1	0.858096828	0.141903172	1	0.858096828	0.923629829	0.958849342	0.041150658	0.702102804	0.782552083	0.740147783
331	1	0	1	1	1	0.858096828	0.141903172	1	0.858096828	0.923629829	0.958849342	0.041150658	0.702102804	0.782552083	0.740147783
331	1	0	1	1	1	0.858096828	0.141903172	1	0.858096828	0.923629829	0.958849342	0.041150658	0.702102804	0.782552083	0.740147783
331	1	0	1	1	1	0.858096828	0.141903172	1	0.858096828	0.923629829	0.958849342	0.041150658	0.702102804	0.782552083	0.740147783
331	1	0	1	1	1	0.858096828	0.141903172	1	0.858096828	0.923629829	0.958849342	0.041150658	0.702102804	0.782552083	0.740147783
331	1	0	1	1	1	0.858096828	0.141903172	1	0.858096828	0.923629829	0.958849342	0.041150658	0.702102804	0.782552083	0.740147783
331	1	0	1	1	1	0.858096828	0.141903172	1	0.858096828	0.923629829	0.958849342	0.041150658	0.702102804	0.782552083	0.740147783
331	1	0	1	1	1	0.858096828	0.141903172	1	0.858096828	0.923629829	0.958849342	0.041150658	0.702102804	0.782552083	0.740147783
331	1	0	1	1	1	0.858096828	0.141903172	1	0.858096828	0.923629829	0.958849342	0.041150658	0.702102804	0.782552083	0.740147783
331	1	0	1	1	1	0.858096828	0.141903172	1	0.858096828	0.923629829	0.958849342	0.041150658	0.702102804	0.782552083	0.740147783
331	1	0	1	1	1	0.858096828	0.141903172	1	0.858096828	0.923629829	0.958849342	0.041150658	0.702102804	0.782552083	0.740147783
331	1	0	1	1	1	0.858096828	0.141903172	1	0.858096828	0.923629829	0.958849342	0.041150658	0.702102804	0.782552083	0.740147783
331	1	0	1	1	1	0.858096828	0.141903172	1	0.858096828	0.923629829	0.958849342	0.041150658	0.702102804	0.782552083	0.740147783
331	1	0	1	1	1	0.858096828	0.141903172	1	0.858096828	0.923629829	0.958849342	0.041150658	0.702102804	0.782552083	0.740147783
331	1	0	1	1	1	0.858096828	0.141903172	1	0.858096828	0.923629829	0.958849342	0.041150658	0.702102804	0.782552083	0.740147783
331	1	0	1	1	1	0.858096828	0.141903172	1	0.858096828	0.923629829	0.958849342	0.041150658	0.702102804	0.782552083	0.740147783
331	1	0	1	1	1	0.858096828	0.141903172	1	0.858096828	0.923629829	0.958849342	0.041150658	0.702102804	0.782552083	0.740147783
330	1	0	1	1	1	0.869932432	0.130067568	1	0.869932432	0.930442638	0.958585071	0.041414929	0.703016241	0.781935484	0.740378742
330	1	0	1	1	1	0.869932432	0.130067568	1	0.869932432	0.930442638	0.958585071	0.041414929	0.703016241	0.781935484	0.740378742
330	1	0	1	1	1	0.869932432	0.130067568	1	0.869932432	0.930442638	0.958585071	0.041414929	0.703016241	0.781935484	0.740378742
330	1	0	1	1	1	0.869932432	0.130067568	1	0.869932432	0.930442638	0.958585071	0.041414929	0.703016241	0.781935484	0.740378742
330	1	0	1	1	1	0.869932432	0.130067568	1	0.869932432	0.930442638	0.958585071	0.041414929	0.703016241	0.781935484	0.740378742
330	1	0	1	1	1	0.869932432	0.130067568	1	0.869932432	0.930442638	0.958585071	0.041414929	0.703016241	0.781935484	0.740378742
330	1	0	1	1	1	0.869932432	0.130067568	1	0.869932432	0.930442638	0.958585071	0.041414929	0.703016241	0.781935484	0.740378742
330	1	0	1	1	1	0.869932432	0.130067568	1	0.869932432	0.930442638	0.958585071	0.041414929	0.703016241	0.781935484	0.740378742
330	1	0	1	1	1	0.869932432	0.130067568	1	0.869932432	0.930442638	0.958585071	0.041414929	0.703016241	0.781935484	0.740378742
330	1	0	1	1	1	0.869932432	0.130067568	1	0.869932432	0.930442638	0.958585071	0.041414929	0.703016241	0.781935484	0.740378742
330	1	0	1	1	1	0.869932432	0.130067568	1	0.869932432	0.930442638	0.958585071	0.041414929	0.703016241	0.781935484	0.740378742
330	1	0	1	1	1	0.869932432	0.130067568	1	0.869932432	0.930442638	0.958585071	0.041414929	0.703016241	0.781935484	0.740378742
330	1	0	1	1	1	0.869932432	0.130067568	1	0.869932432	0.930442638	0.958585071	0.041414929	0.703016241	0.781935484	0.740378742
330	1	0	1	1	1	0.869932432	0.130067568	1	0.869932432	0.930442638	0.958585071	0.041414929	0.703016241	0.781935484	0.740378742
330	1	0	1	1	1	0.869932432	0.130067568	1	0.869932432	0.930442638	0.958585071	0.041414929	0.703016241	0.781935484	0.740378742
330	1	0	1	1	1	0.869932432	0.130067568	1	0.869932432	0.930442638	0.958585071	0.041414929	0.703016241	0.781935484	0.740378742
330	1	0	1	1	1	0.869932432	0.130067568	1	0.869932432	0.930442638	0.958585071	0.041414929	0.703016241	0.781935484	0.740378742
330	1	0	1	1	1	0.869932432	0.130067568	1	0.869932432	0.930442638	0.958585071	0.041414929	0.703016241	0.781935484	0.740378742
330	1	0	1	1	1	0.869932432	0.130067568	1	0.869932432	0.930442638	0.958585071	0.041414929	0.703016241	0.781935484	0.740378742
330	1	0	1	1	1	0.869932432	0.130067568	1	0.869932432	0.930442638	0.958585071	0.041414929	0.703016241	0.781935484	0.740378742
330	1	0	1	1	1	0.869932432	0.130067568	1	0.869932432	0.930442638	0.958585071	0.041414929	0.703016241	0.781935484	0.740378742
330	1	0	1	1	1	0.869932432	0.130067568	1	0.869932432	0.930442638	0.958585071	0.041414929	0.703016241	0.781935484	0.740378742
330	1	0	1	1	1	0.869932432	0.130067568	1	0.869932432	0.930442638	0.958585071	0.041414929	0.703016241	0.781935484	0.740378742
330	1	0	1	1	1	0.869932432	0.130067568	1	0.869932432	0.930442638	0.958585071	0.041414929	0.703016241	0.781935484	0.740378742
330	1	0	1	1	1	0.869932432	0.130067568	1	0.869932432	0.930442638	0.958585071	0.041414929	0.703016241	0.781935484	0.740378742
330	1	0	1	1	1	0.869932432	0.130067568	1	0.869932432	0.930442638	0.958585071	0.041414929	0.703016241	0.781935484	0.740378742
330	1	0	1	1	1	0.869932432	0.130067568	1	0.869932432	0.930442638	0.958585071	0.041414929	0.703016241	0.781935484	0.740378742
330	1	0	1	1	1	0.869932432	0.130067568	1	0.869932432	0.930442638	0.958585071	0.041414929	0.703016241	0.781935484	0.740378742
330	1	0	1	1	1	0.869932432	0.130067568	1	0.869932432	0.930442638	0.958585071	0.041414929	0.703016241	0.781935484	0.740378742
330	1	0	1	1	1	0.869932432	0.130067568	1	0.869932432	0.930442638	0.958585071	0.041414929	0.703016241	0.781935484	0.740378742
330	1	0	1	1	1	0.869932432	0.130067568	1	0.869932432	0.930442638	0.958585071	0.041414929	0.703016241	0.781935484	0.740378742
330	1	0	1	1	1	0.869932432	0.130067568	1	0.869932432	0.930442638	0.958585071	0.041414929	0.703016241	0.781935484	0.740378742
330	1	0	1	1	1	0.869932432	0.130067568	1	0.869932432	0.930442638	0.958585071	0.041414929	0.703016241	0.781935484	0.740378742
330	1	0	1	1	1	0.869932432	0.130067568	1	0.869932432	0.930442638	0.958585071	0.041414929	0.703016241	0.781935484	0.740378742
330	1	0	1	1	1	0.869932432	0.130067568	1	0.869932432	0.930442638	0.958585071	0.041414929	0.703016241	0.781935484	0.740378742
330	1	0	1	1	1	0.869932432	0.130067568	1	0.869932432	0.930442638	0.958585071	0.041414929	0.703016241	0.781935484	0.740378742
330	1	0	1	1	1	0.869932432	0.130067568	1	0.869932432	0.930442638	0.958585071	0.041414929	0.703016241	0.781935484	0.740378742
330	1	0	1	1	1	0.869932432	0.130067568	1	0.869932432	0.930442638	0.958585071	0.041414929	0.703016241	0.781935484	0.740378742
330	1	0	1	1	1	0.869932432	0.130067568	1	0.869932432	0.930442638	0.958585071	0.041414929	0.703016241	0.781935484	0.740378742
330	1	0	1	1	1	0.869932432	0.130067568	1	0.869932432	0.930442638	0.958585071	0.041414929	0.703016241	0.781935484	0.740378742
330	1	0	1	1	1	0.869932432	0.130067568	1	0.869932432	0.930442638	0.958585071	0.041414929	0.703016241	0.781935484	0.740378742
330	1	0	1	1	1	0.869932432	0.130067568	1	0.869932432	0.930442638	0.958585071	0.041414929	0.703016241	0.781935484	0.740378742
330	1	0	1	1	1	0.869932432	0.130067568	1	0.869932432	0.930442638	0.958585071	0.041414929	0.703016241	0.781935484	0.740378742
330	1	0	1	1	1	0.869932432	0.130067568	1	0.869932432	0.930442638	0.958585071	0.041414929	0.703016241	0.781935484	0.740378742
330	1	0	1	1	1	0.869932432	0.130067568	1	0.869932432	0.930442638	0.958585071	0.041414929	0.703016241	0.781935484	0.740378742
330	1	0	1	1	1	0.869932432	0.130067568	1	0.869932432	0.930442638	0.958585071	0.041414929	0.703016241	0.781935484	0.740378742
330	1	0	1	1	1	0.869932432	0.130067568	1	0.869932432	0.930442638	0.958585071	0.041414929	0.703016241	0.781935484	0.740378742
330	1	0	1	1	1	0.869932432	0.130067568	1	0.869932432	0.930442638	0.958585071	0.041414929	0.703016241	0.781935484	0.740378742
330	1	0	1	1	1	0.869932432	0.130067568	1	0.869932432	0.930442638	0.958585071	0.041414929	0.703016241	0.781935484	0.740378742
330	1	0	1	1	1	0.869932432	0.130067568	1	0.869932432	0.930442638	0.958585071	0.041414929	0.703016241	0.781935484	0.740378742
330	1	0	1	1	1	0.869932432	0.130067568	1	0.869932432	0.930442638	0.958585071	0.041414929	0.703016241	0.781935484	0.740378742
330	1	0	1	1	1	0.869932432	0.130067568	1	0.869932432	0.930442638	0.958585071	0.041414929	0.703016241	0.781935484	0.740378742
330	1	0	1	1	1	0.869932432	0.130067568	1	0.869932432	0.930442638	0.958585071	0.041414929	0.703016241	0.781935484	0.740378742
330	1	0	1	1	1	0.869932432	0.130067568	1	0.869932432	0.930442638	0.958585071	0.041414929	0.703016241	0.781935484	0.740378742
330	1	0	1	1	1	0.869932432	0.130067568	1	0.869932432	0.930442638	0.958585071	0.041414929	0.703016241	0.781935484	0.740378742
330	1	0	1	1	1	0.869932432	0.130067568	1	0.869932432	0.930442638	0.958585071	0.041414929	0.703016241	0.781935484	0.740378742
330	1	0	1	1	1	0.869932432	0.130067568	1	0.869932432	0.930442638	0.958585071	0.041414929	0.703016241	0.781935484	0.740378742
330	1	0	1	1	1	0.869932432	0.130067568	1	0.869932432	0.930442638	0.958585071	0.041414929	0.703016241	0.781935484	0.740378742
330	1	0	1	1	1	0.869932432	0.130067568	1	0.869932432	0.930442638	0.958585071	0.041414929	0.703016241	0.781935484	0.740378742
330	1	0	1	1	1	0.869932432	0.130067568	1	0.869932432	0.930442638	0.958585071	0.041414929	0.703016241	0.781935484	0.740378742
330	1	0	1	1	1	0.869932432	0.130067568	1	0.869932432	0.930442638	0.958585071	0.041414929	0.703016241	0.781935484	0.740378742
330	1	0	1	1	1	0.869932432	0.130067568	1	0.869932432	0.930442638	0.958585071	0.041414929	0.703016241	0.781935484	0.740378742
330	1	0	1	1	1	0.869932432	0.130067568	1	0.869932432	0.930442638	0.958585071	0.041414929	0.703016241	0.781935484	0.740378742
330	1	0	1	1	1	0.869932432	0.130067568	1	0.869932432	0.930442638	0.958585071	0.041414929	0.703016241	0.781935484	0.740378742
330	1	0	1	1	1	0.869932432	0.130067568	1	0.869932432	0.930442638	0.958585071	0.041414929	0.703016241	0.781935484	0.740378742
330	1	0	1	1	1	0.869932432	0.130067568	1	0.869932432	0.930442638	0.958585071	0.041414929	0.703016241	0.781935484	0.740378742
330	1	0	1	1	1	0.869932432	0.130067568	1	0.869932432	0.930442638	0.958585071	0.041414929	0.703016241	0.781935484	0.740378742
330	1	0	1	1	1	0.869932432	0.130067568	1	0.869932432	0.930442638	0.958585071	0.041414929	0.703016241	0.781935484	0.740378742
330	1	0	1	1	1	0.869932432	0.130067568	1	0.869932432	0.930442638	0.958585071	0.041414929	0.703016241	0.781935484	0.740378742
330	1	0	1	1	1	0.869932432	0.130067568	1	0.869932432	0.930442638	0.958585071	0.041414929	0.703016241	0.781935484	0.740378742
330	1	0	1	1	1	0.869932432	0.130067568	1	0.869932432	0.930442638	0.958585071	0.041414929	0.703016241	0.781935484	0.740378742
330	1	0	1	1	1	0.869932432	0.130067568	1	0.869932432	0.930442638	0.958585071	0.041414929	0.703016241	0.781935484	0.740378742
330	1	0	1	1	1	0.869932432	0.130067568	1	0.869932432	0.930442638	0.958585071	0.041414929	0.703016241	0.781935484	0.740378742
330	1	0	1	1	1	0.869932432	0.130067568	1	0.869932432	0.930442638	0.958585071	0.041414929	0.703016241	0.781935484	0.740378742
330	1	0	1	1	1	0.869932432	0.130067568	1	0.869932432	0.930442638	0.958585071	0.041414929	0.703016241	0.781935484	0.740378742
330	1	0	1	1	1	0.869932432	0.130067568	1	0.869932432	0.930442638	0.958585071	0.041414929	0.703016241	0.781935484	0.740378742
330	1	0	1	1	1	0.869932432	0.130067568	1	0.869932432	0.930442638	0.958585071	0.041414929	0.703016241	0.781935484	0.740378742
330	1	0	1	1	1	0.869932432	0.130067568	1	0.869932432	0.930442638	0.958585071	0.041414929	0.703016241	0.781935484	0.740378742
330	1	0	1	1	1	0.869932432	0.130067568	1	0.869932432	0.930442638	0.958585071	0.041414929	0.703016241	0.781935484	0.740378742
330	1	0	1	1	1	0.869932432	0.130067568	1	0.869932432	0.930442638	0.958585071	0.041414929	0.703016241	0.781935484	0.740378742
330	1	0	1	1	1	0.869932432	0.130067568	1	0.869932432	0.930442638	0.958585071	0.041414929	0.703016241	0.781935484	0.740378742
330	1	0	1	1	1	0.869932432	0.130067568	1	0.869932432	0.930442638	0.958585071	0.041414929	0.703016241	0.781935484	0.740378742
330	1	0	1	1	1	0.869932432	0.130067568	1	0.869932432	0.930442638	0.958585071	0.041414929	0.703016241	0.781935484	0.740378742
330	1	0	1	1	1	0.869932432	0.130067568	1	0.869932432	0.930442638	0.958585071	0.041414929	0.703016241	0.781935484	0.740378742
330	1	0	1	1	1	0.869932432	0.130067568	1	0.869932432	0.930442638	0.958585071	0.041414929	0.703016241	0.781935484	0.740378742
330	1	0	1	1	1	0.869932432	0.130067568	1	0.869932432	0.930442638	0.958585071	0.041414929	0.703016241	0.781935484	0.740378742
330	1	0	1	1	1	0.869932432	0.130067568	1	0.869932432	0.930442638	0.958585071	0.041414929	0.703016241	0.781935484	0.740378742
330	1	0	1	1	1	0.869932432	0.130067568	1	0.869932432	0.930442638	0.958585071	0.041414929	0.703016241	0.781935484	0.740378742
330	1	0	1	1	1	0.869932432	0.130067568	1	0.869932432	0.930442638	0.958585071	0.041414929	0.703016241	0.781935484	0.740378742
330	1	0	1	1	1	0.869932432	0.130067568	1	0.869932432	0.930442638	0.958585071	0.041414929	0.703016241	0.781935484	0.740378742
330	1	0	1	1	1	0.869932432	0.130067568	1	0.869932432	0.930442638	0.958585071	0.041414929	0.703016241	0.781935484	0.740378742
330	1	0	1	1	1	0.869932432	0.130067568	1	0.869932432	0.930442638	0.958585071	0.041414929	0.703016241	0.781935484	0.740378742
330	1	0	1	1	1	0.869932432	0.130067568	1	0.869932432	0.930442638	0.958585071	0.041414929	0.703016241	0.781935484	0.740378742
330	1	0	1	1	1	0.869932432	0.130067568	1	0.869932432	0.930442638	0.958585071	0.041414929	0.703016241	0.781935484	0.740378742
330	1	0	1	1	1	0.869932432	0.130067568	1	0.869932432	0.930442638	0.958585071	0.041414929	0.703016241	0.781935484	0.740378742
330	1	0	1	1	1	0.869932432	0.130067568	1	0.869932432	0.930442638	0.958585071	0.041414929	0.703016241	0.781935484	0.740378742
330	1	0	1	1	1	0.869932432	0.130067568	1	0.869932432	0.930442638	0.958585071	0.041414929	0.703016241	0.781935484	0.740378742
330	1	0	1	1	1	0.869932432	0.130067568	1	0.869932432	0.930442638	0.958585071	0.041414929	0.703016241	0.781935484	0.740378742
330	1	0	1	1	1	0.869932432	0.130067568	1	0.869932432	0.930442638	0.958585071	0.041414929	0.703016241	0.781935484	0.740378742
330	1	0	1	1	1	0.869932432	0.130067568	1	0.869932432	0.930442638	0.958585071	0.041414929	0.703016241	0.781935484	0.740378742
330	1	0	1	1	1	0.869932432	0.130067568	1	0.869932432	0.930442638	0.958585071	0.041414929	0.703016241	0.781935484	0.740378742
330	1	0	1	1	1	0.869932432	0.130067568	1	0.869932432	0.930442638	0.958585071	0.041414929	0.703016241	0.781935484	0.740378742
330	1	0	1	1	1	0.869932432	0.130067568	1	0.869932432	0.930442638	0.958585071	0.041414929	0.703016241	0.781935484	0.740378742
330	1	0	1	1	1	0.869932432	0.130067568	1	0.869932432	0.930442638	0.958585071	0.041414929	0.703016241	0.781935484	0.740378742
330	1	0	1	1	1	0.869932432	0.130067568	1	0.869932432	0.930442638	0.958585071	0.041414929	0.703016241	0.781935484	0.740378742
330	1	0	1	1	1	0.869932432	0.130067568	1	0.869932432	0.930442638	0.958585071	0.041414929	0.703016241	0.781935484	0.740378742
330	1	0	1	1	1	0.869932432	0.130067568	1	0.869932432	0.930442638	0.958585071	0.041414929	0.703016241	0.781935484	0.740378742
330	1	0	1	1	1	0.869932432	0.130067568	1	0.869932432	0.930442638	0.958585071	0.041414929	0.703016241	0.781935484	0.740378742
330	1	0	1	1	1	0.869932432	0.130067568	1	0.869932432	0.930442638	0.958585071	0.041414929	0.703016241	0.781935484	0.740378742
330	1	0	1	1	1	0.869932432	0.130067568	1	0.869932432	0.930442638	0.958585071	0.041414929	0.703016241	0.781935484	0.740378742
330	1	0	1	1	1	0.869932432	0.130067568	1	0.869932432	0.930442638	0.958585071	0.041414929	0.703016241	0.781935484	0.740378742
330	1	0	1	1	1	0.869932432	0.130067568	1	0.869932432	0.930442638	0.958585071	0.041414929	0.703016241	0.781935484	0.740378742
330	1	0	1	1	1	0.869932432	0.130067568	1	0.869932432	0.930442638	0.958585071	0.041414929	0.703016241	0.781935484	0.740378742
330	1	0	1	1	1	0.869932432	0.130067568	1	0.869932432	0.930442638	0.958585071	0.041414929	0.703016241	0.781935484	0.740378742
330	1	0	1	1	1	0.869932432	0.130067568	1	0.869932432	0.930442638	0.958585071	0.041414929	0.703016241	0.781935484	0.740378742
330	1	0	1	1	1	0.869932432	0.130067568	1	0.869932432	0.930442638	0.958585071	0.041414929	0.703016241	0.781935484	0.740378742
330	1	0	1	1	1	0.869932432	0.130067568	1	0.869932432	0.930442638	0.958585071	0.041414929	0.703016241	0.781935484	0.740378742
330	1	0	1	1	1	0.869932432	0.130067568	1	0.869932432	0.930442638	0.958585071	0.041414929	0.703016241	0.781935484	0.740378742
330	1	0	1	1	1	0.869932432	0.130067568	1	0.869932432	0.930442638	0.958585071	0.041414929	0.703016241	0.781935484	0.740378742
330	1	0	1	1	1	0.869932432	0.130067568	1	0.869932432	0.930442638	0.958585071	0.041414929	0.703016241	0.781935484	0.740378742
330	1	0	1	1	1	0.869932432	0.130067568	1	0.869932432	0.930442638	0.958585071	0.041414929	0.703016241	0.781935484	0.740378742
330	1	0	1	1	1	0.869932432	0.130067568	1	0.869932432	0.930442638	0.958585071	0.041414929	0.703016241	0.781935484	0.740378742
330	1	0	1	1	1	0.869932432	0.130067568	1	0.869932432	0.930442638	0.958585071	0.041414929	0.703016241	0.781935484	0.740378742
330	1	0	1	1	1	0.869932432	0.130067568	1	0.869932432	0.930442638	0.958585071	0.041414929	0.703016241	0.781935484	0.740378742
330	1	0	1	1	1	0.869932432	0.130067568	1	0.869932432	0.930442638	0.958585071	0.041414929	0.703016241	0.781935484	0.740378742
330	1	0	1	1	1	0.869932432	0.130067568	1	0.869932432	0.930442638	0.958585071	0.041414929	0.703016241	0.781935484	0.740378742
330	1	0	1	1	1	0.869932432	0.130067568	1	0.869932432	0.930442638	0.958585071	0.041414929	0.703016241	0.781935484	0.740378742
330	1	0	1	1	1	0.869932432	0.130067568	1	0.869932432	0.930442638	0.958585071	0.041414929	0.703016241	0.781935484	0.740378742
330	1	0	1	1	1	0.869932432	0.130067568	1	0.869932432	0.930442638	0.958585071	0.041414929	0.703016241	0.781935484	0.740378742
330	1	0	1	1	1	0.869932432	0.130067568	1	0.869932432	0.930442638	0.958585071	0.041414929	0.703016241	0.781935484	0.740378742
330	1	0	1	1	1	0.869932432	0.130067568	1	0.869932432	0.930442638	0.958585071	0.041414929	0.703016241	0.781935484	0.740378742
330	1	0	1	1	1	0.869932432	0.130067568	1	0.869932432	0.930442638	0.958585071	0.041414929	0.703016241	0.781935484	0.740378742
330	1	0	1	1	1	0.869932432	0.130067568	1	0.869932432	0.930442638	0.958585071	0.041414929	0.703016241	0.781935484	0.740378742
330	1	0	1	1	1	0.869932432	0.130067568	1	0.869932432	0.930442638	0.958585071	0.041414929	0.703016241	0.781935484	0.740378742
330	1	0	1	1	1	0.869932432	0.130067568	1	0.869932432	0.930442638	0.958585071	0.041414929	0.703016241	0.781935484	0.740378742
330	1	0	1	1	1	0.869932432	0.130067568	1	0.869932432	0.930442638	0.958585071	0.041414929	0.703016241	0.781935484	0.740378742
330	1	0	1	1	1	0.869932432	0.130067568	1	0.869932432	0.930442638	0.958585071	0.041414929	0.703016241	0.781935484	0.740378742
330	1	0	1	1	1	0.869932432	0.130067568	1	0.869932432	0.930442638	0.958585071	0.041414929	0.703016241	0.781935484	0.740378742
330	1	0	1	1	1	0.869932432	0.130067568	1	0.869932432	0.930442638	0.958585071	0.041414929	0.703016241	0.781935484	0.740378742
330	1	0	1	1	1	0.869932432	0.130067568	1	0.869932432	0.930442638	0.958585071	0.041414929	0.703016241	0.781935484	0.740378742
330	1	0	1	1	1	0.869932432	0.130067568	1	0.869932432	0.930442638	0.958585071	0.041414929	0.703016241	0.781935484	0.740378742
330	1	0	1	1	1	0.869932432	0.130067568	1	0.869932432	0.930442638	0.958585071	0.041414929	0.703016241	0.781935484	0.740378742
330	1	0	1	1	1	0.869932432	0.130067568	1	0.869932432	0.930442638	0.958585071	0.041414929	0.703016241	0.781935484	0.740378742
330	1	0	1	1	1	0.869932432	0.130067568	1	0.869932432	0.930442638	0.958585071	0.041414929	0.703016241	0.781935484	0.740378742
330	1	0	1	1	1	0.869932432	0.130067568	1	0.869932432	0.930442638	0.958585071	0.041414929	0.703016241	0.781935484	0.740378742
330	1	0	1	1	1	0.869932432	0.130067568	1	0.869932432	0.930442638	0.958585071	0.041414929	0.703016241	0.781935484	0.740378742
330	1	0	1	1	1	0.869932432	0.130067568	1	0.869932432	0.930442638	0.958585071	0.041414929	0.703016241	0.781935484	0.740378742
330	1	0	1	1	1	0.869932432	0.130067568	1	0.869932432	0.930442638	0.958585071	0.041414929	0.703016241	0.781935484	0.740378742
330	1	0	1	1	1	0.869932432	0.130067568	1	0.869932432	0.930442638	0.958585071	0.041414929	0.703016241	0.781935484	0.740378742
330	1	0	1	1	1	0.869932432	0.130067568	1	0.869932432	0.930442638	0.958585071	0.041414929	0.703016241	0.781935484	0.740378742
330	1	0	1	1	1	0.869932432	0.130067568	1	0.869932432	0.930442638	0.958585071	0.041414929	0.703016241	0.781935484	0.740378742
330	1	0	1	1	1	0.869932432	0.130067568	1	0.869932432	0.930442638	0.958585071	0.041414929	0.703016241	0.781935484	0.740378742
330	1	0	1	1	1	0.869932432	0.130067568	1	0.869932432	0.930442638	0.958585071	0.041414929	0.703016241	0.781935484	0.740378742
330	1	0	1	1	1	0.869932432	0.130067568	1	0.869932432	0.930442638	0.958585071	0.041414929	0.703016241	0.781935484	0.740378742
330	1	0	1	1	1	0.869932432	0.130067568	1	0.869932432	0.930442638	0.958585071	0.041414929	0.703016241	0.781935484	0.740378742
330	1	0	1	1	1	0.869932432	0.130067568	1	0.869932432	0.930442638	0.958585071	0.041414929	0.703016241	0.781935484	0.740378742
330	1	0	1	1	1	0.869932432	0.130067568	1	0.869932432	0.930442638	0.958585071	0.041414929	0.703016241	0.781935484	0.740378742
330	1	0	1	1	1	0.869932432	0.130067568	1	0.869932432	0.930442638	0.958585071	0.041414929	0.703016241	0.781935484	0.740378742
330	1	0	1	1	1	0.869932432	0.130067568	1	0.869932432	0.930442638	0.958585071	0.041414929	0.703016241	0.781935484	0.740378742
330	1	0	1	1	1	0.869932432	0.130067568	1	0.869932432	0.930442638	0.958585071	0.041414929	0.703016241	0.781935484	0.740378742
330	1	0	1	1	1	0.869932432	0.130067568	1	0.869932432	0.930442638	0.958585071	0.041414929	0.703016241	0.781935484	0.740378742
330	1	0	1	1	1	0.869932432	0.130067568	1	0.869932432	0.930442638	0.958585071	0.041414929	0.703016241	0.781935484	0.740378742
330	1	0	1	1	1	0.869932432	0.130067568	1	0.869932432	0.930442638	0.958585071	0.041414929	0.703016241	0.781935484	0.740378742
330	1	0	1	1	1	0.869932432	0.130067568	1	0.869932432	0.930442638	0.958585071	0.041414929	0.703016241	0.781935484	0.740378742
330	1	0	1	1	1	0.869932432	0.130067568	1	0.869932432	0.930442638	0.958585071	0.041414929	0.703016241	0.781935484	0.740378742
330	1	0	1	1	1	0.869932432	0.130067568	1	0.869932432	0.930442638	0.958585071	0.041414929	0.703016241	0.781935484	0.740378742
330	1	0	1	1	1	0.869932432	0.130067568	1	0.869932432	0.930442638	0.958585071	0.041414929	0.703016241	0.781935484	0.740378742
330	1	0	1	1	1	0.869932432	0.130067568	1	0.869932432	0.930442638	0.958585071	0.041414929	0.703016241	0.781935484	0.740378742
330	1	0	1	1	1	0.869932432	0.130067568	1	0.869932432	0.930442638	0.958585071	0.041414929	0.703016241	0.781935484	0.740378742
330	1	0	1	1	1	0.869932432	0.130067568	1	0.869932432	0.930442638	0.958585071	0.041414929	0.703016241	0.781935484	0.740378742
330	1	0	1	1	1	0.869932432	0.130067568	1	0.869932432	0.930442638	0.958585071	0.041414929	0.703016241	0.781935484	0.740378742
330	1	0	1	1	1	0.869932432	0.130067568	1	0.869932432	0.930442638	0.958585071	0.041414929	0.703016241	0.781935484	0.740378742
330	1	0	1	1	1	0.869932432	0.130067568	1	0.869932432	0.930442638	0.958585071	0.041414929	0.703016241	0.781935484	0.740378742
330	1	0	1	1	1	0.869932432	0.130067568	1	0.869932432	0.930442638	0.958585071	0.041414929	0.703016241	0.781935484	0.740378742
330	1	0	1	1	1	0.869932432	0.130067568	1	0.869932432	0.930442638	0.958585071	0.041414929	0.703016241	0.781935484	0.740378742
330	1	0	1	1	1	0.869932432	0.130067568	1	0.869932432	0.930442638	0.958585071	0.041414929	0.703016241	0.781935484	0.740378742
330	1	0	1	1	1	0.869932432	0.130067568	1	0.869932432	0.930442638	0.958585071	0.041414929	0.703016241	0.781935484	0.740378742
330	1	0	1	1	1	0.869932432	0.130067568	1	0.869932432	0.930442638	0.958585071	0.041414929	0.703016241	0.781935484	0.740378742
330	1	0	1	1	1	0.869932432	0.130067568	1	0.869932432	0.930442638	0.958585071	0.041414929	0.703016241	0.781935484	0.740378742
330	1	0	1	1	1	0.869932432	0.130067568	1	0.869932432	0.930442638	0.958585071	0.041414929	0.703016241	0.781935484	0.740378742
330	1	0	1	1	1	0.869932432	0.130067568	1	0.869932432	0.930442638	0.958585071	0.041414929	0.703016241	0.781935484	0.740378742
330	1	0	1	1	1	0.869932432	0.130067568	1	0.869932432	0.930442638	0.958585071	0.041414929	0.703016241	0.781935484	0.740378742
330	1	0	1	1	1	0.869932432	0.130067568	1	0.869932432	0.930442638	0.958585071	0.041414929	0.703016241	0.781935484	0.740378742
330	1	0	1	1	1	0.869932432	0.130067568	1	0.869932432	0.930442638	0.958585071	0.041414929	0.703016241	0.781935484	0.740378742
330	1	0	1	1	1	0.869932432	0.130067568	1	0.869932432	0.930442638	0.958585071	0.041414929	0.703016241	0.781935484	0.740378742
330	1	0	1	1	1	0.869932432	0.130067568	1	0.869932432	0.930442638	0.958585071	0.041414929	0.703016241	0.781935484	0.740378742
330	1	0	1	1	1	0.869932432	0.130067568	1	0.869932432	0.930442638	0.958585071	0.041414929	0.703016241	0.781935484	0.740378742
330	1	0	1	1	1	0.869932432	0.130067568	1	0.869932432	0.930442638	0.958585071	0.041414929	0.703016241	0.781935484	0.740378742
330	1	0	1	1	1	0.869932432	0.130067568	1	0.869932432	0.930442638	0.958585071	0.041414929	0.703016241	0.781935484	0.740378742
330	1	0	1	1	1	0.869932432	0.130067568	1	0.869932432	0.930442638	0.958585071	0.041414929	0.703016241	0.781935484	0.740378742
330	1	0	1	1	1	0.869932432	0.130067568	1	0.869932432	0.930442638	0.958585071	0.041414929	0.703016241	0.781935484	0.740378742
330	1	0	1	1	1	0.869932432	0.130067568	1	0.869932432	0.930442638	0.958585071	0.041414929	0.703016241	0.781935484	0.740378742
330	1	0	1	1	1	0.869932432	0.130067568	1	0.869932432	0.930442638	0.958585071	0.041414929	0.703016241	0.781935484	0.740378742
330	1	0	1	1	1	0.869932432	0.130067568	1	0.869932432	0.930442638	0.958585071	0.041414929	0.703016241	0.781935484	0.740378742
330	1	0	1	1	1	0.869932432	0.130067568	1	0.869932432	0.930442638	0.958585071	0.041414929	0.703016241	0.781935484	0.740378742
330	1	0	1	1	1	0.869932432	0.130067568	1	0.869932432	0.930442638	0.958585071	0.041414929	0.703016241	0.781935484	0.740378742
330	1	0	1	1	1	0.869932432	0.130067568	1	0.869932432	0.930442638	0.958585071	0.041414929	0.703016241	0.781935484	0.740378742
330	1	0	1	1	1	0.869932432	0.130067568	1	0.869932432	0.930442638	0.958585071	0.041414929	0.703016241	0.781935484	0.740378742
330	1	0	1	1	1	0.869932432	0.130067568	1	0.869932432	0.930442638	0.958585071	0.041414929	0.703016241	0.781935484	0.740378742
330	1	0	1	1	1	0.869932432	0.130067568	1	0.869932432	0.930442638	0.958585071	0.041414929	0.703016241	0.781935484	0.740378742
330	1	0	1	1	1	0.869932432	0.130067568	1	0.869932432	0.930442638	0.958585071	0.041414929	0.703016241	0.781935484	0.740378742
330	1	0	1	1	1	0.869932432	0.130067568	1	0.869932432	0.930442638	0.958585071	0.041414929	0.703016241	0.781935484	0.740378742
330	1	0	1	1	1	0.869932432	0.130067568	1	0.869932432	0.930442638	0.958585071	0.041414929	0.703016241	0.781935484	0.740378742
330	1	0	1	1	1	0.869932432	0.130067568	1	0.869932432	0.930442638	0.958585071	0.041414929	0.703016241	0.781935484	0.740378742
330	1	0	1	1	1	0.869932432	0.130067568	1	0.869932432	0.930442638	0.958585071	0.041414929	0.703016241	0.781935484	0.740378742
330	1	0	1	1	1	0.869932432	0.130067568	1	0.869932432	0.930442638	0.958585071	0.041414929	0.703016241	0.781935484	0.740378742
330	1	0	1	1	1	0.869932432	0.130067568	1	0.869932432	0.930442638	0.958585071	0.041414929	0.703016241	0.781935484	0.740378742
330	1	0	1	1	1	0.869932432	0.130067568	1	0.869932432	0.930442638	0.958585071	0.041414929	0.703016241	0.781935484	0.740378742
330	1	0	1	1	1	0.869932432	0.130067568	1	0.869932432	0.930442638	0.958585071	0.041414929	0.703016241	0.781935484	0.740378742
330	1	0	1	1	1	0.869932432	0.130067568	1	0.869932432	0.930442638	0.958585071	0.041414929	0.703016241	0.781935484	0.740378742
330	1	0	1	1	1	0.869932432	0.130067568	1	0.869932432	0.930442638	0.958585071	0.041414929	0.703016241	0.781935484	0.740378742
330	1	0	1	1	1	0.869932432	0.130067568	1	0.869932432	0.930442638	0.958585071	0.041414929	0.703016241	0.781935484	0.740378742
330	1	0	1	1	1	0.869932432	0.130067568	1	0.869932432	0.930442638	0.958585071	0.041414929	0.703016241	0.781935484	0.740378742
330	1	0	1	1	1	0.869932432	0.130067568	1	0.869932432	0.930442638	0.958585071	0.041414929	0.703016241	0.781935484	0.740378742
330	1	0	1	1	1	0.869932432	0.130067568	1	0.869932432	0.930442638	0.958585071	0.041414929	0.703016241	0.781935484	0.740378742
330	1	0	1	1	1	0.869932432	0.130067568	1	0.869932432	0.930442638	0.958585071	0.041414929	0.703016241	0.781935484	0.740378742
330	1	0	1	1	1	0.869932432	0.130067568	1	0.869932432	0.930442638	0.958585071	0.041414929	0.703016241	0.781935484	0.740378742
330	1	0	1	1	1	0.869932432	0.130067568	1	0.869932432	0.930442638	0.958585071	0.041414929	0.703016241	0.781935484	0.740378742
330	1	0	1	1	1	0.869932432	0.130067568	1	0.869932432	0.930442638	0.958585071	0.041414929	0.703016241	0.781935484	0.740378742
330	1	0	1	1	1	0.869932432	0.130067568	1	0.869932432	0.930442638	0.958585071	0.041414929	0.703016241	0.781935484	0.740378742
330	1	0	1	1	1	0.869932432	0.130067568	1	0.869932432	0.930442638	0.958585071	0.041414929	0.703016241	0.781935484	0.740378742
330	1	0	1	1	1	0.869932432	0.130067568	1	0.869932432	0.930442638	0.958585071	0.041414929	0.703016241	0.781935484	0.740378742
330	1	0	1	1	1	0.869932432	0.130067568	1	0.869932432	0.930442638	0.958585071	0.041414929	0.703016241	0.781935484	0.740378742
330	1	0	1	1	1	0.869932432	0.130067568	1	0.869932432	0.930442638	0.958585071	0.041414929	0.703016241	0.781935484	0.740378742
330	1	0	1	1	1	0.869932432	0.130067568	1	0.869932432	0.930442638	0.958585071	0.041414929	0.703016241	0.781935484	0.740378742
330	1	0	1	1	1	0.869932432	0.130067568	1	0.869932432	0.930442638	0.958585071	0.041414929	0.703016241	0.781935484	0.740378742
330	1	0	1	1	1	0.869932432	0.130067568	1	0.869932432	0.930442638	0.958585071	0.041414929	0.703016241	0.781935484	0.740378742
330	1	0	1	1	1	0.869932432	0.130067568	1	0.869932432	0.930442638	0.958585071	0.041414929	0.703016241	0.781935484	0.740378742
330	1	0	1	1	1	0.869932432	0.130067568	1	0.869932432	0.930442638	0.958585071	0.041414929	0.703016241	0.781935484	0.740378742
330	1	0	1	1	1	0.869932432	0.130067568	1	0.869932432	0.930442638	0.958585071	0.041414929	0.703016241	0.781935484	0.740378742
330	1	0	1	1	1	0.869932432	0.130067568	1	0.869932432	0.930442638	0.958585071	0.041414929	0.703016241	0.781935484	0.740378742
330	1	0	1	1	1	0.869932432	0.130067568	1	0.869932432	0.930442638	0.958585071	0.041414929	0.703016241	0.781935484	0.740378742
330	1	0	1	1	1	0.869932432	0.130067568	1	0.869932432	0.930442638	0.958585071	0.041414929	0.703016241	0.781935484	0.740378742
330	1	0	1	1	1	0.869932432	0.130067568	1	0.869932432	0.930442638	0.958585071	0.041414929	0.703016241	0.781935484	0.740378742
330	1	0	1	1	1	0.869932432	0.130067568	1	0.869932432	0.930442638	0.958585071	0.041414929	0.703016241	0.781935484	0.740378742
330	1	0	1	1	1	0.869932432	0.130067568	1	0.869932432	0.930442638	0.958585071	0.041414929	0.703016241	0.781935484	0.740378742
330	1	0	1	1	1	0.869932432	0.130067568	1	0.869932432	0.930442638	0.958585071	0.041414929	0.703016241	0.781935484	0.740378742
330	1	0	1	1	1	0.869932432	0.130067568	1	0.869932432	0.930442638	0.958585071	0.041414929	0.703016241	0.781935484	0.740378742
330	1	0	1	1	1	0.869932432	0.130067568	1	0.869932432	0.930442638	0.958585071	0.041414929	0.703016241	0.781935484	0.740378742
330	1	0	1	1	1	0.869932432	0.130067568	1	0.869932432	0.930442638	0.958585071	0.041414929	0.703016241	0.781935484	0.740378742
330	1	0	1	1	1	0.869932432	0.130067568	1	0.869932432	0.930442638	0.958585071	0.041414929	0.703016241	0.781935484	0.740378742
330	1	0	1	1	1	0.869932432	0.130067568	1	0.869932432	0.930442638	0.958585071	0.041414929	0.703016241	0.781935484	0.740378742
330	1	0	1	1	1	0.869932432	0.130067568	1	0.869932432	0.930442638	0.958585071	0.041414929	0.703016241	0.781935484	0.740378742
330	1	0	1	1	1	0.869932432	0.130067568	1	0.869932432	0.930442638	0.958585071	0.041414929	0.703016241	0.781935484	0.740378742
330	1	0	1	1	1	0.869932432	0.130067568	1	0.869932432	0.930442638	0.958585071	0.041414929	0.703016241	0.781935484	0.740378742
330	1	0	1	1	1	0.869932432	0.130067568	1	0.869932432	0.930442638	0.958585071	0.041414929	0.703016241	0.781935484	0.740378742
330	1	0	1	1	1	0.869932432	0.130067568	1	0.869932432	0.930442638	0.958585071	0.041414929	0.703016241	0.781935484	0.740378742
330	1	0	1	1	1	0.869932432	0.130067568	1	0.869932432	0.930442638	0.958585071	0.041414929	0.703016241	0.781935484	0.740378742
330	1	0	1	1	1	0.869932432	0.130067568	1	0.869932432	0.930442638	0.958585071	0.041414929	0.703016241	0.781935484	0.740378742
330	1	0	1	1	1	0.869932432	0.130067568	1	0.869932432	0.930442638	0.958585071	0.041414929	0.703016241	0.781935484	0.740378742
330	1	0	1	1	1	0.869932432	0.130067568	1	0.869932432	0.930442638	0.958585071	0.041414929	0.703016241	0.781935484	0.740378742
330	1	0	1	1	1	0.869932432	0.130067568	1	0.869932432	0.930442638	0.958585071	0.041414929	0.703016241	0.781935484	0.740378742
330	1	0	1	1	1	0.869932432	0.130067568	1	0.869932432	0.930442638	0.958585071	0.041414929	0.703016241	0.781935484	0.740378742
330	1	0	1	1	1	0.869932432	0.130067568	1	0.869932432	0.930442638	0.958585071	0.041414929	0.703016241	0.781935484	0.740378742
330	1	0	1	1	1	0.869932432	0.130067568	1	0.869932432	0.930442638	0.958585071	0.041414929	0.703016241	0.781935484	0.740378742
330	1	0	1	1	1	0.869932432	0.130067568	1	0.869932432	0.930442638	0.958585071	0.041414929	0.703016241	0.781935484	0.740378742
330	1	0	1	1	1	0.869932432	0.130067568	1	0.869932432	0.930442638	0.958585071	0.041414929	0.703016241	0.781935484	0.740378742
330	1	0	1	1	1	0.869932432	0.130067568	1	0.869932432	0.930442638	0.958585071	0.041414929	0.703016241	0.781935484	0.740378742
330	1	0	1	1	1	0.869932432	0.130067568	1	0.869932432	0.930442638	0.958585071	0.041414929	0.703016241	0.781935484	0.740378742
330	1	0	1	1	1	0.869932432	0.130067568	1	0.869932432	0.930442638	0.958585071	0.041414929	0.703016241	0.781935484	0.740378742
330	1	0	1	1	1	0.869932432	0.130067568	1	0.869932432	0.930442638	0.958585071	0.041414929	0.703016241	0.781935484	0.740378742
330	1	0	1	1	1	0.869932432	0.130067568	1	0.869932432	0.930442638	0.958585071	0.041414929	0.703016241	0.781935484	0.740378742
330	1	0	1	1	1	0.869932432	0.130067568	1	0.869932432	0.930442638	0.958585071	0.041414929	0.703016241	0.781935484	0.740378742
330	1	0	1	1	1	0.869932432	0.130067568	1	0.869932432	0.930442638	0.958585071	0.041414929	0.703016241	0.781935484	0.740378742
330	1	0	1	1	1	0.869932432	0.130067568	1	0.869932432	0.930442638	0.958585071	0.041414929	0.703016241	0.781935484	0.740378742
330	1	0	1	1	1	0.869932432	0.130067568	1	0.869932432	0.930442638	0.958585071	0.041414929	0.703016241	0.781935484	0.740378742
330	1	0	1	1	1	0.869932432	0.130067568	1	0.869932432	0.930442638	0.958585071	0.041414929	0.703016241	0.781935484	0.740378742
330	1	0	1	1	1	0.869932432	0.130067568	1	0.869932432	0.930442638	0.958585071	0.041414929	0.703016241	0.781935484	0.740378742
330	1	0	1	1	1	0.869932432	0.130067568	1	0.869932432	0.930442638	0.958585071	0.041414929	0.703016241	0.781935484	0.740378742
330	1	0	1	1	1	0.869932432	0.130067568	1	0.869932432	0.930442638	0.958585071	0.041414929	0.703016241	0.781935484	0.740378742
330	1	0	1	1	1	0.869932432	0.130067568	1	0.869932432	0.930442638	0.958585071	0.041414929	0.703016241	0.781935484	0.740378742
330	1	0	1	1	1	0.869932432	0.130067568	1	0.869932432	0.930442638	0.958585071	0.041414929	0.703016241	0.781935484	0.740378742
330	1	0	1	1	1	0.869932432	0.130067568	1	0.869932432	0.930442638	0.958585071	0.041414929	0.703016241	0.781935484	0.740378742
330	1	0	1	1	1	0.869932432	0.130067568	1	0.869932432	0.930442638	0.958585071	0.041414929	0.703016241	0.781935484	0.740378742
330	1	0	1	1	1	0.869932432	0.130067568	1	0.869932432	0.930442638	0.958585071	0.041414929	0.703016241	0.781935484	0.740378742
330	1	0	1	1	1	0.869932432	0.130067568	1	0.869932432	0.930442638	0.958585071	0.041414929	0.703016241	0.781935484	0.740378742
330	1	0	1	1	1	0.869932432	0.130067568	1	0.869932432	0.930442638	0.958585071	0.041414929	0.703016241	0.781935484	0.740378742
330	1	0	1	1	1	0.869932432	0.130067568	1	0.869932432	0.930442638	0.958585071	0.041414929	0.703016241	0.781935484	0.740378742
330	1	0	1	1	1	0.869932432	0.130067568	1	0.869932432	0.930442638	0.958585071	0.041414929	0.703016241	0.781935484	0.740378742
330	1	0	1	1	1	0.869932432	0.130067568	1	0.869932432	0.930442638	0.958585071	0.041414929	0.703016241	0.781935484	0.740378742
330	1	0	1	1	1	0.869932432	0.130067568	1	0.869932432	0.930442638	0.958585071	0.041414929	0.703016241	0.781935484	0.740378742
330	1	0	1	1	1	0.869932432	0.130067568	1	0.869932432	0.930442638	0.958585071	0.041414929	0.703016241	0.781935484	0.740378742
330	1	0	1	1	1	0.869932432	0.130067568	1	0.869932432	0.930442638	0.958585071	0.041414929	0.703016241	0.781935484	0.740378742
330	1	0	1	1	1	0.869932432	0.130067568	1	0.869932432	0.930442638	0.958585071	0.041414929	0.703016241	0.781935484	0.740378742
330	1	0	1	1	1	0.869932432	0.130067568	1	0.869932432	0.930442638	0.958585071	0.041414929	0.703016241	0.781935484	0.740378742
330	1	0	1	1	1	0.869932432	0.130067568	1	0.869932432	0.930442638	0.958585071	0.041414929	0.703016241	0.781935484	0.740378742
330	1	0	1	1	1	0.869932432	0.130067568	1	0.869932432	0.930442638	0.958585071	0.041414929	0.703016241	0.781935484	0.740378742
330	1	0	1	1	1	0.869932432	0.130067568	1	0.869932432	0.930442638	0.958585071	0.041414929	0.703016241	0.781935484	0.740378742
330	1	0	1	1	1	0.869932432	0.130067568	1	0.869932432	0.930442638	0.958585071	0.041414929	0.703016241	0.781935484	0.740378742
330	1	0	1	1	1	0.869932432	0.130067568	1	0.869932432	0.930442638	0.958585071	0.041414929	0.703016241	0.781935484	0.740378742
330	1	0	1	1	1	0.869932432	0.130067568	1	0.869932432	0.930442638	0.958585071	0.041414929	0.703016241	0.781935484	0.740378742
330	1	0	1	1	1	0.869932432	0.130067568	1	0.869932432	0.930442638	0.958585071	0.041414929	0.703016241	0.781935484	0.740378742
330	1	0	1	1	1	0.869932432	0.130067568	1	0.869932432	0.930442638	0.958585071	0.041414929	0.703016241	0.781935484	0.740378742
330	1	0	1	1	1	0.869932432	0.130067568	1	0.869932432	0.930442638	0.958585071	0.041414929	0.703016241	0.781935484	0.740378742
330	1	0	1	1	1	0.869932432	0.130067568	1	0.869932432	0.930442638	0.958585071	0.041414929	0.703016241	0.781935484	0.740378742
330	1	0	1	1	1	0.869932432	0.130067568	1	0.869932432	0.930442638	0.958585071	0.041414929	0.703016241	0.781935484	0.740378742
330	1	0	1	1	1	0.869932432	0.130067568	1	0.869932432	0.930442638	0.958585071	0.041414929	0.703016241	0.781935484	0.740378742
330	1	0	1	1	1	0.869932432	0.130067568	1	0.869932432	0.930442638	0.958585071	0.041414929	0.703016241	0.781935484	0.740378742
330	1	0	1	1	1	0.869932432	0.130067568	1	0.869932432	0.930442638	0.958585071	0.041414929	0.703016241	0.781935484	0.740378742
330	1	0	1	1	1	0.869932432	0.130067568	1	0.869932432	0.930442638	0.958585071	0.041414929	0.703016241	0.781935484	0.740378742
330	1	0	1	1	1	0.869932432	0.130067568	1	0.869932432	0.930442638	0.958585071	0.041414929	0.703016241	0.781935484	0.740378742
330	1	0	1	1	1	0.869932432	0.130067568	1	0.869932432	0.930442638	0.958585071	0.041414929	0.703016241	0.781935484	0.740378742
330	1	0	1	1	1	0.869932432	0.130067568	1	0.869932432	0.930442638	0.958585071	0.041414929	0.703016241	0.781935484	0.740378742
330	1	0	1	1	1	0.869932432	0.130067568	1	0.869932432	0.930442638	0.958585071	0.041414929	0.703016241	0.781935484	0.740378742
330	1	0	1	1	1	0.869932432	0.130067568	1	0.869932432	0.930442638	0.958585071	0.041414929	0.703016241	0.781935484	0.740378742
330	1	0	1	1	1	0.869932432	0.130067568	1	0.869932432	0.930442638	0.958585071	0.041414929	0.703016241	0.781935484	0.740378742
330	1	0	1	1	1	0.869932432	0.130067568	1	0.869932432	0.930442638	0.958585071	0.041414929	0.703016241	0.781935484	0.740378742
330	1	0	1	1	1	0.869932432	0.130067568	1	0.869932432	0.930442638	0.958585071	0.041414929	0.703016241	0.781935484	0.740378742
330	1	0	1	1	1	0.869932432	0.130067568	1	0.869932432	0.930442638	0.958585071	0.041414929	0.703016241	0.781935484	0.740378742
330	1	0	1	1	1	0.869932432	0.130067568	1	0.869932432	0.930442638	0.958585071	0.041414929	0.703016241	0.781935484	0.740378742
330	1	0	1	1	1	0.869932432	0.130067568	1	0.869932432	0.930442638	0.958585071	0.041414929	0.703016241	0.781935484	0.740378742
330	1	0	1	1	1	0.869932432	0.130067568	1	0.869932432	0.930442638	0.958585071	0.041414929	0.703016241	0.781935484	0.740378742
330	1	0	1	1	1	0.869932432	0.130067568	1	0.869932432	0.930442638	0.958585071	0.041414929	0.703016241	0.781935484	0.740378742
330	1	0	1	1	1	0.869932432	0.130067568	1	0.869932432	0.930442638	0.958585071	0.041414929	0.703016241	0.781935484	0.740378742
330	1	0	1	1	1	0.869932432	0.130067568	1	0.869932432	0.930442638	0.958585071	0.041414929	0.703016241	0.781935484	0.740378742
330	1	0	1	1	1	0.869932432	0.130067568	1	0.869932432	0.930442638	0.958585071	0.041414929	0.703016241	0.781935484	0.740378742
330	1	0	1	1	1	0.869932432	0.130067568	1	0.869932432	0.930442638	0.958585071	0.041414929	0.703016241	0.781935484	0.740378742
330	1	0	1	1	1	0.869932432	0.130067568	1	0.869932432	0.930442638	0.958585071	0.041414929	0.703016241	0.781935484	0.740378742
330	1	0	1	1	1	0.869932432	0.130067568	1	0.869932432	0.930442638	0.958585071	0.041414929	0.703016241	0.781935484	0.740378742
330	1	0	1	1	1	0.869932432	0.130067568	1	0.869932432	0.930442638	0.958585071	0.041414929	0.703016241	0.781935484	0.740378742
330	1	0	1	1	1	0.869932432	0.130067568	1	0.869932432	0.930442638	0.958585071	0.041414929	0.703016241	0.781935484	0.740378742
330	1	0	1	1	1	0.869932432	0.130067568	1	0.869932432	0.930442638	0.958585071	0.041414929	0.703016241	0.781935484	0.740378742
330	1	0	1	1	1	0.869932432	0.130067568	1	0.869932432	0.930442638	0.958585071	0.041414929	0.703016241	0.781935484	0.740378742
330	1	0	1	1	1	0.869932432	0.130067568	1	0.869932432	0.930442638	0.958585071	0.041414929	0.703016241	0.781935484	0.740378742
330	1	0	1	1	1	0.869932432	0.130067568	1	0.869932432	0.930442638	0.958585071	0.041414929	0.703016241	0.781935484	0.740378742
330	1	0	1	1	1	0.869932432	0.130067568	1	0.869932432	0.930442638	0.958585071	0.041414929	0.703016241	0.781935484	0.740378742
330	1	0	1	1	1	0.869932432	0.130067568	1	0.869932432	0.930442638	0.958585071	0.041414929	0.703016241	0.781935484	0.740378742
330	1	0	1	1	1	0.869932432	0.130067568	1	0.869932432	0.930442638	0.958585071	0.041414929	0.703016241	0.781935484	0.740378742
330	1	0	1	1	1	0.869932432	0.130067568	1	0.869932432	0.930442638	0.958585071	0.041414929	0.703016241	0.781935484	0.740378742
330	1	0	1	1	1	0.869932432	0.130067568	1	0.869932432	0.930442638	0.958585071	0.041414929	0.703016241	0.781935484	0.740378742
330	1	0	1	1	1	0.869932432	0.130067568	1	0.869932432	0.930442638	0.958585071	0.041414929	0.703016241	0.781935484	0.740378742
330	1	0	1	1	1	0.869932432	0.130067568	1	0.869932432	0.930442638	0.958585071	0.041414929	0.703016241	0.781935484	0.740378742
330	1	0	1	1	1	0.869932432	0.130067568	1	0.869932432	0.930442638	0.958585071	0.041414929	0.703016241	0.781935484	0.740378742
330	1	0	1	1	1	0.869932432	0.130067568	1	0.869932432	0.930442638	0.958585071	0.041414929	0.703016241	0.781935484	0.740378742
330	1	0	1	1	1	0.869932432	0.130067568	1	0.869932432	0.930442638	0.958585071	0.041414929	0.703016241	0.781935484	0.740378742
330	1	0	1	1	1	0.869932432	0.130067568	1	0.869932432	0.930442638	0.958585071	0.041414929	0.703016241	0.781935484	0.740378742
330	1	0	1	1	1	0.869932432	0.130067568	1	0.869932432	0.930442638	0.958585071	0.041414929	0.703016241	0.781935484	0.740378742
330	1	0	1	1	1	0.869932432	0.130067568	1	0.869932432	0.930442638	0.958585071	0.041414929	0.703016241	0.781935484	0.740378742
330	1	0	1	1	1	0.869932432	0.130067568	1	0.869932432	0.930442638	0.958585071	0.041414929	0.703016241	0.781935484	0.740378742
330	1	0	1	1	1	0.869932432	0.130067568	1	0.869932432	0.930442638	0.958585071	0.041414929	0.703016241	0.781935484	0.740378742
330	1	0	1	1	1	0.869932432	0.130067568	1	0.869932432	0.930442638	0.958585071	0.041414929	0.703016241	0.781935484	0.740378742
330	1	0	1	1	1	0.869932432	0.130067568	1	0.869932432	0.930442638	0.958585071	0.041414929	0.703016241	0.781935484	0.740378742
330	1	0	1	1	1	0.869932432	0.130067568	1	0.869932432	0.930442638	0.958585071	0.041414929	0.703016241	0.781935484	0.740378742
330	1	0	1	1	1	0.869932432	0.130067568	1	0.869932432	0.930442638	0.958585071	0.041414929	0.703016241	0.781935484	0.740378742
330	1	0	1	1	1	0.869932432	0.130067568	1	0.869932432	0.930442638	0.958585071	0.041414929	0.703016241	0.781935484	0.740378742
330	1	0	1	1	1	0.869932432	0.130067568	1	0.869932432	0.930442638	0.958585071	0.041414929	0.703016241	0.781935484	0.740378742
330	1	0	1	1	1	0.869932432	0.130067568	1	0.869932432	0.930442638	0.958585071	0.041414929	0.703016241	0.781935484	0.740378742
330	1	0	1	1	1	0.869932432	0.130067568	1	0.869932432	0.930442638	0.958585071	0.041414929	0.703016241	0.781935484	0.740378742
330	1	0	1	1	1	0.869932432	0.130067568	1	0.869932432	0.930442638	0.958585071	0.041414929	0.703016241	0.781935484	0.740378742
330	1	0	1	1	1	0.869932432	0.130067568	1	0.869932432	0.930442638	0.958585071	0.041414929	0.703016241	0.781935484	0.740378742
330	1	0	1	1	1	0.869932432	0.130067568	1	0.869932432	0.930442638	0.958585071	0.041414929	0.703016241	0.781935484	0.740378742
330	1	0	1	1	1	0.869932432	0.130067568	1	0.869932432	0.930442638	0.958585071	0.041414929	0.703016241	0.781935484	0.740378742
330	1	0	1	1	1	0.869932432	0.130067568	1	0.869932432	0.930442638	0.958585071	0.041414929	0.703016241	0.781935484	0.740378742
330	1	0	1	1	1	0.869932432	0.130067568	1	0.869932432	0.930442638	0.958585071	0.041414929	0.703016241	0.781935484	0.740378742
330	1	0	1	1	1	0.869932432	0.130067568	1	0.869932432	0.930442638	0.958585071	0.041414929	0.703016241	0.781935484	0.740378742
330	1	0	1	1	1	0.869932432	0.130067568	1	0.869932432	0.930442638	0.958585071	0.041414929	0.703016241	0.781935484	0.740378742
330	1	0	1	1	1	0.869932432	0.130067568	1	0.869932432	0.930442638	0.958585071	0.041414929	0.703016241	0.781935484	0.740378742
330	1	0	1	1	1	0.869932432	0.130067568	1	0.869932432	0.930442638	0.958585071	0.041414929	0.703016241	0.781935484	0.740378742
330	1	0	1	1	1	0.869932432	0.130067568	1	0.869932432	0.930442638	0.958585071	0.041414929	0.703016241	0.781935484	0.740378742
330	1	0	1	1	1	0.869932432	0.130067568	1	0.869932432	0.930442638	0.958585071	0.041414929	0.703016241	0.781935484	0.740378742
330	1	0	1	1	1	0.869932432	0.130067568	1	0.869932432	0.930442638	0.958585071	0.041414929	0.703016241	0.781935484	0.740378742
330	1	0	1	1	1	0.869932432	0.130067568	1	0.869932432	0.930442638	0.958585071	0.041414929	0.703016241	0.781935484	0.740378742
330	1	0	1	1	1	0.869932432	0.130067568	1	0.869932432	0.930442638	0.958585071	0.041414929	0.703016241	0.781935484	0.740378742
330	1	0	1	1	1	0.869932432	0.130067568	1	0.869932432	0.930442638	0.958585071	0.041414929	0.703016241	0.781935484	0.740378742
330	1	0	1	1	1	0.869932432	0.130067568	1	0.869932432	0.930442638	0.958585071	0.041414929	0.703016241	0.781935484	0.740378742
330	1	0	1	1	1	0.869932432	0.130067568	1	0.869932432	0.930442638	0.958585071	0.041414929	0.703016241	0.781935484	0.740378742
330	1	0	1	1	1	0.869932432	0.130067568	1	0.869932432	0.930442638	0.958585071	0.041414929	0.703016241	0.781935484	0.740378742
330	1	0	1	1	1	0.869932432	0.130067568	1	0.869932432	0.930442638	0.958585071	0.041414929	0.703016241	0.781935484	0.740378742
330	1	0	1	1	1	0.869932432	0.130067568	1	0.869932432	0.930442638	0.958585071	0.041414929	0.703016241	0.781935484	0.740378742
330	1	0	1	1	1	0.869932432	0.130067568	1	0.869932432	0.930442638	0.958585071	0.041414929	0.703016241	0.781935484	0.740378742
330	1	0	1	1	1	0.869932432	0.130067568	1	0.869932432	0.930442638	0.958585071	0.041414929	0.703016241	0.781935484	0.740378742
330	1	0	1	1	1	0.869932432	0.130067568	1	0.869932432	0.930442638	0.958585071	0.041414929	0.703016241	0.781935484	0.740378742
330	1	0	1	1	1	0.869932432	0.130067568	1	0.869932432	0.930442638	0.958585071	0.041414929	0.703016241	0.781935484	0.740378742
330	1	0	1	1	1	0.869932432	0.130067568	1	0.869932432	0.930442638	0.958585071	0.041414929	0.703016241	0.781935484	0.740378742
330	1	0	1	1	1	0.869932432	0.130067568	1	0.869932432	0.930442638	0.958585071	0.041414929	0.703016241	0.781935484	0.740378742
