# Supplementary material for: An Improved Hybrid Feature Selection Algorithm for Electric Charge Recovery Risk
Source: Hindawi journal article supplement (doi:10.1155/2020/8479341), 2020-08-28
Supplement: f1 [file 8479341.f1.zip › 8479341.f1/Experimental Results/201807/BPSO_results.csv]

features_num	Accuracy_high	Loss_high	Precission_high	Recall_high	F1_high	Accuracy_med	Loss_med	Precission_med	Recall_med	F1_med	Accuracy_low	Loss_low	Precission_low	Recall_low	F1_low
376	1.0	0.0	1.0	1.0	1.0	0.8052147239263804	0.19478527607361962	0.9540441176470589	0.8357487922705314	0.8909871244635192	0.9092870452093753	0.09071295479062469	0.4274447949526814	0.7314439946018894	0.5395719263315082
356	1.0	0.0	1.0	1.0	1.0	0.890625	0.109375	0.9972489683631361	0.8906633906633906	0.9409474367293964	0.9342144788224692	0.06578552117753078	0.4358264081255771	0.9111969111969112	0.589631480324797
356	1.0	0.0	1.0	1.0	1.0	0.890625	0.109375	0.9972489683631361	0.8906633906633906	0.9409474367293964	0.9342144788224692	0.06578552117753078	0.4358264081255771	0.9111969111969112	0.589631480324797
356	1.0	0.0	1.0	1.0	1.0	0.890625	0.109375	0.9972489683631361	0.8906633906633906	0.9409474367293964	0.9342144788224692	0.06578552117753078	0.4358264081255771	0.9111969111969112	0.589631480324797
372	1.0	0.0	1.0	1.0	1.0	0.7886178861788617	0.21138211382113825	0.930921052631579	0.8323529411764706	0.8788819875776399	0.9231282784930853	0.07687172150691468	0.5811903012490816	0.7702044790652386	0.6624790619765494
372	1.0	0.0	1.0	1.0	1.0	0.7886178861788617	0.21138211382113825	0.930921052631579	0.8323529411764706	0.8788819875776399	0.9231282784930853	0.07687172150691468	0.5811903012490816	0.7702044790652386	0.6624790619765494
372	1.0	0.0	1.0	1.0	1.0	0.7886178861788617	0.21138211382113825	0.930921052631579	0.8323529411764706	0.8788819875776399	0.9231282784930853	0.07687172150691468	0.5811903012490816	0.7702044790652386	0.6624790619765494
372	1.0	0.0	1.0	1.0	1.0	0.7886178861788617	0.21138211382113825	0.930921052631579	0.8323529411764706	0.8788819875776399	0.9231282784930853	0.07687172150691468	0.5811903012490816	0.7702044790652386	0.6624790619765494
372	1.0	0.0	1.0	1.0	1.0	0.7886178861788617	0.21138211382113825	0.930921052631579	0.8323529411764706	0.8788819875776399	0.9231282784930853	0.07687172150691468	0.5811903012490816	0.7702044790652386	0.6624790619765494
372	1.0	0.0	1.0	1.0	1.0	0.7886178861788617	0.21138211382113825	0.930921052631579	0.8323529411764706	0.8788819875776399	0.9231282784930853	0.07687172150691468	0.5811903012490816	0.7702044790652386	0.6624790619765494
372	1.0	0.0	1.0	1.0	1.0	0.7886178861788617	0.21138211382113825	0.930921052631579	0.8323529411764706	0.8788819875776399	0.9231282784930853	0.07687172150691468	0.5811903012490816	0.7702044790652386	0.6624790619765494
372	1.0	0.0	1.0	1.0	1.0	0.7886178861788617	0.21138211382113825	0.930921052631579	0.8323529411764706	0.8788819875776399	0.9231282784930853	0.07687172150691468	0.5811903012490816	0.7702044790652386	0.6624790619765494
372	1.0	0.0	1.0	1.0	1.0	0.7886178861788617	0.21138211382113825	0.930921052631579	0.8323529411764706	0.8788819875776399	0.9231282784930853	0.07687172150691468	0.5811903012490816	0.7702044790652386	0.6624790619765494
372	1.0	0.0	1.0	1.0	1.0	0.7886178861788617	0.21138211382113825	0.930921052631579	0.8323529411764706	0.8788819875776399	0.9231282784930853	0.07687172150691468	0.5811903012490816	0.7702044790652386	0.6624790619765494
372	1.0	0.0	1.0	1.0	1.0	0.7886178861788617	0.21138211382113825	0.930921052631579	0.8323529411764706	0.8788819875776399	0.9231282784930853	0.07687172150691468	0.5811903012490816	0.7702044790652386	0.6624790619765494
372	1.0	0.0	1.0	1.0	1.0	0.7886178861788617	0.21138211382113825	0.930921052631579	0.8323529411764706	0.8788819875776399	0.9231282784930853	0.07687172150691468	0.5811903012490816	0.7702044790652386	0.6624790619765494
372	1.0	0.0	1.0	1.0	1.0	0.7886178861788617	0.21138211382113825	0.930921052631579	0.8323529411764706	0.8788819875776399	0.9231282784930853	0.07687172150691468	0.5811903012490816	0.7702044790652386	0.6624790619765494
372	1.0	0.0	1.0	1.0	1.0	0.7886178861788617	0.21138211382113825	0.930921052631579	0.8323529411764706	0.8788819875776399	0.9231282784930853	0.07687172150691468	0.5811903012490816	0.7702044790652386	0.6624790619765494
372	1.0	0.0	1.0	1.0	1.0	0.7886178861788617	0.21138211382113825	0.930921052631579	0.8323529411764706	0.8788819875776399	0.9231282784930853	0.07687172150691468	0.5811903012490816	0.7702044790652386	0.6624790619765494
372	1.0	0.0	1.0	1.0	1.0	0.7886178861788617	0.21138211382113825	0.930921052631579	0.8323529411764706	0.8788819875776399	0.9231282784930853	0.07687172150691468	0.5811903012490816	0.7702044790652386	0.6624790619765494
372	1.0	0.0	1.0	1.0	1.0	0.7886178861788617	0.21138211382113825	0.930921052631579	0.8323529411764706	0.8788819875776399	0.9231282784930853	0.07687172150691468	0.5811903012490816	0.7702044790652386	0.6624790619765494
372	1.0	0.0	1.0	1.0	1.0	0.7886178861788617	0.21138211382113825	0.930921052631579	0.8323529411764706	0.8788819875776399	0.9231282784930853	0.07687172150691468	0.5811903012490816	0.7702044790652386	0.6624790619765494
372	1.0	0.0	1.0	1.0	1.0	0.7886178861788617	0.21138211382113825	0.930921052631579	0.8323529411764706	0.8788819875776399	0.9231282784930853	0.07687172150691468	0.5811903012490816	0.7702044790652386	0.6624790619765494
372	1.0	0.0	1.0	1.0	1.0	0.7886178861788617	0.21138211382113825	0.930921052631579	0.8323529411764706	0.8788819875776399	0.9231282784930853	0.07687172150691468	0.5811903012490816	0.7702044790652386	0.6624790619765494
372	1.0	0.0	1.0	1.0	1.0	0.7886178861788617	0.21138211382113825	0.930921052631579	0.8323529411764706	0.8788819875776399	0.9231282784930853	0.07687172150691468	0.5811903012490816	0.7702044790652386	0.6624790619765494
372	1.0	0.0	1.0	1.0	1.0	0.7886178861788617	0.21138211382113825	0.930921052631579	0.8323529411764706	0.8788819875776399	0.9231282784930853	0.07687172150691468	0.5811903012490816	0.7702044790652386	0.6624790619765494
372	1.0	0.0	1.0	1.0	1.0	0.7886178861788617	0.21138211382113825	0.930921052631579	0.8323529411764706	0.8788819875776399	0.9231282784930853	0.07687172150691468	0.5811903012490816	0.7702044790652386	0.6624790619765494
372	1.0	0.0	1.0	1.0	1.0	0.7886178861788617	0.21138211382113825	0.930921052631579	0.8323529411764706	0.8788819875776399	0.9231282784930853	0.07687172150691468	0.5811903012490816	0.7702044790652386	0.6624790619765494
372	1.0	0.0	1.0	1.0	1.0	0.7886178861788617	0.21138211382113825	0.930921052631579	0.8323529411764706	0.8788819875776399	0.9231282784930853	0.07687172150691468	0.5811903012490816	0.7702044790652386	0.6624790619765494
372	1.0	0.0	1.0	1.0	1.0	0.7886178861788617	0.21138211382113825	0.930921052631579	0.8323529411764706	0.8788819875776399	0.9231282784930853	0.07687172150691468	0.5811903012490816	0.7702044790652386	0.6624790619765494
380	1.0	0.0	1.0	1.0	1.0	0.8051948051948052	0.19480519480519476	0.9477806788511749	0.8383371824480369	0.8897058823529411	0.9231139337952271	0.0768860662047729	0.5485262401150252	0.816916488222698	0.6563440860215053
380	1.0	0.0	1.0	1.0	1.0	0.8051948051948052	0.19480519480519476	0.9477806788511749	0.8383371824480369	0.8897058823529411	0.9231139337952271	0.0768860662047729	0.5485262401150252	0.816916488222698	0.6563440860215053
380	1.0	0.0	1.0	1.0	1.0	0.8699861687413555	0.13001383125864452	0.9967585089141004	0.8698727015558698	0.9290030211480362	0.931477093206951	0.06852290679304895	0.48406546080964685	0.8554033485540334	0.6182618261826184
380	1.0	0.0	1.0	1.0	1.0	0.8699861687413555	0.13001383125864452	0.9967585089141004	0.8698727015558698	0.9290030211480362	0.931477093206951	0.06852290679304895	0.48406546080964685	0.8554033485540334	0.6182618261826184
380	1.0	0.0	1.0	1.0	1.0	0.8699861687413555	0.13001383125864452	0.9967585089141004	0.8698727015558698	0.9290030211480362	0.931477093206951	0.06852290679304895	0.48406546080964685	0.8554033485540334	0.6182618261826184
380	1.0	0.0	1.0	1.0	1.0	0.8699861687413555	0.13001383125864452	0.9967585089141004	0.8698727015558698	0.9290030211480362	0.931477093206951	0.06852290679304895	0.48406546080964685	0.8554033485540334	0.6182618261826184
380	1.0	0.0	1.0	1.0	1.0	0.8699861687413555	0.13001383125864452	0.9967585089141004	0.8698727015558698	0.9290030211480362	0.931477093206951	0.06852290679304895	0.48406546080964685	0.8554033485540334	0.6182618261826184
380	1.0	0.0	1.0	1.0	1.0	0.8699861687413555	0.13001383125864452	0.9967585089141004	0.8698727015558698	0.9290030211480362	0.931477093206951	0.06852290679304895	0.48406546080964685	0.8554033485540334	0.6182618261826184
362	1.0	0.0	1.0	1.0	1.0	0.8427745664739884	0.1572254335260116	1.0	0.8427745664739884	0.9146800501882058	0.9617579337270998	0.038242066272900166	0.573170731707317	0.9362549800796812	0.7110438729198184
362	1.0	0.0	1.0	1.0	1.0	0.8427745664739884	0.1572254335260116	1.0	0.8427745664739884	0.9146800501882058	0.9617579337270998	0.038242066272900166	0.573170731707317	0.9362549800796812	0.7110438729198184
362	1.0	0.0	1.0	1.0	1.0	0.8427745664739884	0.1572254335260116	1.0	0.8427745664739884	0.9146800501882058	0.9617579337270998	0.038242066272900166	0.573170731707317	0.9362549800796812	0.7110438729198184
362	1.0	0.0	1.0	1.0	1.0	0.8427745664739884	0.1572254335260116	1.0	0.8427745664739884	0.9146800501882058	0.9617579337270998	0.038242066272900166	0.573170731707317	0.9362549800796812	0.7110438729198184
362	1.0	0.0	1.0	1.0	1.0	0.8427745664739884	0.1572254335260116	1.0	0.8427745664739884	0.9146800501882058	0.9617579337270998	0.038242066272900166	0.573170731707317	0.9362549800796812	0.7110438729198184
362	1.0	0.0	1.0	1.0	1.0	0.8427745664739884	0.1572254335260116	1.0	0.8427745664739884	0.9146800501882058	0.9617579337270998	0.038242066272900166	0.573170731707317	0.9362549800796812	0.7110438729198184
362	1.0	0.0	1.0	1.0	1.0	0.8427745664739884	0.1572254335260116	1.0	0.8427745664739884	0.9146800501882058	0.9617579337270998	0.038242066272900166	0.573170731707317	0.9362549800796812	0.7110438729198184
362	1.0	0.0	1.0	1.0	1.0	0.8427745664739884	0.1572254335260116	1.0	0.8427745664739884	0.9146800501882058	0.9617579337270998	0.038242066272900166	0.573170731707317	0.9362549800796812	0.7110438729198184
362	1.0	0.0	1.0	1.0	1.0	0.8427745664739884	0.1572254335260116	1.0	0.8427745664739884	0.9146800501882058	0.9617579337270998	0.038242066272900166	0.573170731707317	0.9362549800796812	0.7110438729198184
362	1.0	0.0	1.0	1.0	1.0	0.8427745664739884	0.1572254335260116	1.0	0.8427745664739884	0.9146800501882058	0.9617579337270998	0.038242066272900166	0.573170731707317	0.9362549800796812	0.7110438729198184
362	1.0	0.0	1.0	1.0	1.0	0.8427745664739884	0.1572254335260116	1.0	0.8427745664739884	0.9146800501882058	0.9617579337270998	0.038242066272900166	0.573170731707317	0.9362549800796812	0.7110438729198184
362	1.0	0.0	1.0	1.0	1.0	0.8427745664739884	0.1572254335260116	1.0	0.8427745664739884	0.9146800501882058	0.9617579337270998	0.038242066272900166	0.573170731707317	0.9362549800796812	0.7110438729198184
362	1.0	0.0	1.0	1.0	1.0	0.8427745664739884	0.1572254335260116	1.0	0.8427745664739884	0.9146800501882058	0.9617579337270998	0.038242066272900166	0.573170731707317	0.9362549800796812	0.7110438729198184
362	1.0	0.0	1.0	1.0	1.0	0.8427745664739884	0.1572254335260116	1.0	0.8427745664739884	0.9146800501882058	0.9617579337270998	0.038242066272900166	0.573170731707317	0.9362549800796812	0.7110438729198184
362	1.0	0.0	1.0	1.0	1.0	0.8427745664739884	0.1572254335260116	1.0	0.8427745664739884	0.9146800501882058	0.9617579337270998	0.038242066272900166	0.573170731707317	0.9362549800796812	0.7110438729198184
362	1.0	0.0	1.0	1.0	1.0	0.8427745664739884	0.1572254335260116	1.0	0.8427745664739884	0.9146800501882058	0.9617579337270998	0.038242066272900166	0.573170731707317	0.9362549800796812	0.7110438729198184
362	1.0	0.0	1.0	1.0	1.0	0.8427745664739884	0.1572254335260116	1.0	0.8427745664739884	0.9146800501882058	0.9617579337270998	0.038242066272900166	0.573170731707317	0.9362549800796812	0.7110438729198184
362	1.0	0.0	1.0	1.0	1.0	0.8427745664739884	0.1572254335260116	1.0	0.8427745664739884	0.9146800501882058	0.9617579337270998	0.038242066272900166	0.573170731707317	0.9362549800796812	0.7110438729198184
362	1.0	0.0	1.0	1.0	1.0	0.8427745664739884	0.1572254335260116	1.0	0.8427745664739884	0.9146800501882058	0.9617579337270998	0.038242066272900166	0.573170731707317	0.9362549800796812	0.7110438729198184
362	1.0	0.0	1.0	1.0	1.0	0.8427745664739884	0.1572254335260116	1.0	0.8427745664739884	0.9146800501882058	0.9617579337270998	0.038242066272900166	0.573170731707317	0.9362549800796812	0.7110438729198184
362	1.0	0.0	1.0	1.0	1.0	0.8427745664739884	0.1572254335260116	1.0	0.8427745664739884	0.9146800501882058	0.9617579337270998	0.038242066272900166	0.573170731707317	0.9362549800796812	0.7110438729198184
362	1.0	0.0	1.0	1.0	1.0	0.8427745664739884	0.1572254335260116	1.0	0.8427745664739884	0.9146800501882058	0.9617579337270998	0.038242066272900166	0.573170731707317	0.9362549800796812	0.7110438729198184
362	1.0	0.0	1.0	1.0	1.0	0.8427745664739884	0.1572254335260116	1.0	0.8427745664739884	0.9146800501882058	0.9617579337270998	0.038242066272900166	0.573170731707317	0.9362549800796812	0.7110438729198184
362	1.0	0.0	1.0	1.0	1.0	0.8427745664739884	0.1572254335260116	1.0	0.8427745664739884	0.9146800501882058	0.9617579337270998	0.038242066272900166	0.573170731707317	0.9362549800796812	0.7110438729198184
362	1.0	0.0	1.0	1.0	1.0	0.8427745664739884	0.1572254335260116	1.0	0.8427745664739884	0.9146800501882058	0.9617579337270998	0.038242066272900166	0.573170731707317	0.9362549800796812	0.7110438729198184
362	1.0	0.0	1.0	1.0	1.0	0.8427745664739884	0.1572254335260116	1.0	0.8427745664739884	0.9146800501882058	0.9617579337270998	0.038242066272900166	0.573170731707317	0.9362549800796812	0.7110438729198184
362	1.0	0.0	1.0	1.0	1.0	0.8427745664739884	0.1572254335260116	1.0	0.8427745664739884	0.9146800501882058	0.9617579337270998	0.038242066272900166	0.573170731707317	0.9362549800796812	0.7110438729198184
362	1.0	0.0	1.0	1.0	1.0	0.8427745664739884	0.1572254335260116	1.0	0.8427745664739884	0.9146800501882058	0.9617579337270998	0.038242066272900166	0.573170731707317	0.9362549800796812	0.7110438729198184
362	1.0	0.0	1.0	1.0	1.0	0.8427745664739884	0.1572254335260116	1.0	0.8427745664739884	0.9146800501882058	0.9617579337270998	0.038242066272900166	0.573170731707317	0.9362549800796812	0.7110438729198184
362	1.0	0.0	1.0	1.0	1.0	0.8427745664739884	0.1572254335260116	1.0	0.8427745664739884	0.9146800501882058	0.9617579337270998	0.038242066272900166	0.573170731707317	0.9362549800796812	0.7110438729198184
362	1.0	0.0	1.0	1.0	1.0	0.8427745664739884	0.1572254335260116	1.0	0.8427745664739884	0.9146800501882058	0.9617579337270998	0.038242066272900166	0.573170731707317	0.9362549800796812	0.7110438729198184
362	1.0	0.0	1.0	1.0	1.0	0.8427745664739884	0.1572254335260116	1.0	0.8427745664739884	0.9146800501882058	0.9617579337270998	0.038242066272900166	0.573170731707317	0.9362549800796812	0.7110438729198184
362	1.0	0.0	1.0	1.0	1.0	0.8427745664739884	0.1572254335260116	1.0	0.8427745664739884	0.9146800501882058	0.9617579337270998	0.038242066272900166	0.573170731707317	0.9362549800796812	0.7110438729198184
362	1.0	0.0	1.0	1.0	1.0	0.8427745664739884	0.1572254335260116	1.0	0.8427745664739884	0.9146800501882058	0.9617579337270998	0.038242066272900166	0.573170731707317	0.9362549800796812	0.7110438729198184
362	1.0	0.0	1.0	1.0	1.0	0.8427745664739884	0.1572254335260116	1.0	0.8427745664739884	0.9146800501882058	0.9617579337270998	0.038242066272900166	0.573170731707317	0.9362549800796812	0.7110438729198184
362	1.0	0.0	1.0	1.0	1.0	0.8427745664739884	0.1572254335260116	1.0	0.8427745664739884	0.9146800501882058	0.9617579337270998	0.038242066272900166	0.573170731707317	0.9362549800796812	0.7110438729198184
362	1.0	0.0	1.0	1.0	1.0	0.8427745664739884	0.1572254335260116	1.0	0.8427745664739884	0.9146800501882058	0.9617579337270998	0.038242066272900166	0.573170731707317	0.9362549800796812	0.7110438729198184
362	1.0	0.0	1.0	1.0	1.0	0.8427745664739884	0.1572254335260116	1.0	0.8427745664739884	0.9146800501882058	0.9617579337270998	0.038242066272900166	0.573170731707317	0.9362549800796812	0.7110438729198184
362	1.0	0.0	1.0	1.0	1.0	0.8427745664739884	0.1572254335260116	1.0	0.8427745664739884	0.9146800501882058	0.9617579337270998	0.038242066272900166	0.573170731707317	0.9362549800796812	0.7110438729198184
362	1.0	0.0	1.0	1.0	1.0	0.8427745664739884	0.1572254335260116	1.0	0.8427745664739884	0.9146800501882058	0.9617579337270998	0.038242066272900166	0.573170731707317	0.9362549800796812	0.7110438729198184
362	1.0	0.0	1.0	1.0	1.0	0.8427745664739884	0.1572254335260116	1.0	0.8427745664739884	0.9146800501882058	0.9617579337270998	0.038242066272900166	0.573170731707317	0.9362549800796812	0.7110438729198184
362	1.0	0.0	1.0	1.0	1.0	0.8427745664739884	0.1572254335260116	1.0	0.8427745664739884	0.9146800501882058	0.9617579337270998	0.038242066272900166	0.573170731707317	0.9362549800796812	0.7110438729198184
362	1.0	0.0	1.0	1.0	1.0	0.8427745664739884	0.1572254335260116	1.0	0.8427745664739884	0.9146800501882058	0.9617579337270998	0.038242066272900166	0.573170731707317	0.9362549800796812	0.7110438729198184
362	1.0	0.0	1.0	1.0	1.0	0.8427745664739884	0.1572254335260116	1.0	0.8427745664739884	0.9146800501882058	0.9617579337270998	0.038242066272900166	0.573170731707317	0.9362549800796812	0.7110438729198184
362	1.0	0.0	1.0	1.0	1.0	0.8427745664739884	0.1572254335260116	1.0	0.8427745664739884	0.9146800501882058	0.9617579337270998	0.038242066272900166	0.573170731707317	0.9362549800796812	0.7110438729198184
362	1.0	0.0	1.0	1.0	1.0	0.8427745664739884	0.1572254335260116	1.0	0.8427745664739884	0.9146800501882058	0.9617579337270998	0.038242066272900166	0.573170731707317	0.9362549800796812	0.7110438729198184
362	1.0	0.0	1.0	1.0	1.0	0.8427745664739884	0.1572254335260116	1.0	0.8427745664739884	0.9146800501882058	0.9617579337270998	0.038242066272900166	0.573170731707317	0.9362549800796812	0.7110438729198184
362	1.0	0.0	1.0	1.0	1.0	0.8427745664739884	0.1572254335260116	1.0	0.8427745664739884	0.9146800501882058	0.9617579337270998	0.038242066272900166	0.573170731707317	0.9362549800796812	0.7110438729198184
362	1.0	0.0	1.0	1.0	1.0	0.8427745664739884	0.1572254335260116	1.0	0.8427745664739884	0.9146800501882058	0.9617579337270998	0.038242066272900166	0.573170731707317	0.9362549800796812	0.7110438729198184
362	1.0	0.0	1.0	1.0	1.0	0.8427745664739884	0.1572254335260116	1.0	0.8427745664739884	0.9146800501882058	0.9617579337270998	0.038242066272900166	0.573170731707317	0.9362549800796812	0.7110438729198184
362	1.0	0.0	1.0	1.0	1.0	0.8427745664739884	0.1572254335260116	1.0	0.8427745664739884	0.9146800501882058	0.9617579337270998	0.038242066272900166	0.573170731707317	0.9362549800796812	0.7110438729198184
362	1.0	0.0	1.0	1.0	1.0	0.8427745664739884	0.1572254335260116	1.0	0.8427745664739884	0.9146800501882058	0.9617579337270998	0.038242066272900166	0.573170731707317	0.9362549800796812	0.7110438729198184
362	1.0	0.0	1.0	1.0	1.0	0.8427745664739884	0.1572254335260116	1.0	0.8427745664739884	0.9146800501882058	0.9617579337270998	0.038242066272900166	0.573170731707317	0.9362549800796812	0.7110438729198184
362	1.0	0.0	1.0	1.0	1.0	0.8427745664739884	0.1572254335260116	1.0	0.8427745664739884	0.9146800501882058	0.9617579337270998	0.038242066272900166	0.573170731707317	0.9362549800796812	0.7110438729198184
362	1.0	0.0	1.0	1.0	1.0	0.8427745664739884	0.1572254335260116	1.0	0.8427745664739884	0.9146800501882058	0.9617579337270998	0.038242066272900166	0.573170731707317	0.9362549800796812	0.7110438729198184
362	1.0	0.0	1.0	1.0	1.0	0.8427745664739884	0.1572254335260116	1.0	0.8427745664739884	0.9146800501882058	0.9617579337270998	0.038242066272900166	0.573170731707317	0.9362549800796812	0.7110438729198184
362	1.0	0.0	1.0	1.0	1.0	0.8427745664739884	0.1572254335260116	1.0	0.8427745664739884	0.9146800501882058	0.9617579337270998	0.038242066272900166	0.573170731707317	0.9362549800796812	0.7110438729198184
362	1.0	0.0	1.0	1.0	1.0	0.8427745664739884	0.1572254335260116	1.0	0.8427745664739884	0.9146800501882058	0.9617579337270998	0.038242066272900166	0.573170731707317	0.9362549800796812	0.7110438729198184
362	1.0	0.0	1.0	1.0	1.0	0.8427745664739884	0.1572254335260116	1.0	0.8427745664739884	0.9146800501882058	0.9617579337270998	0.038242066272900166	0.573170731707317	0.9362549800796812	0.7110438729198184
362	1.0	0.0	1.0	1.0	1.0	0.8427745664739884	0.1572254335260116	1.0	0.8427745664739884	0.9146800501882058	0.9617579337270998	0.038242066272900166	0.573170731707317	0.9362549800796812	0.7110438729198184
362	1.0	0.0	1.0	1.0	1.0	0.8427745664739884	0.1572254335260116	1.0	0.8427745664739884	0.9146800501882058	0.9617579337270998	0.038242066272900166	0.573170731707317	0.9362549800796812	0.7110438729198184
362	1.0	0.0	1.0	1.0	1.0	0.8427745664739884	0.1572254335260116	1.0	0.8427745664739884	0.9146800501882058	0.9617579337270998	0.038242066272900166	0.573170731707317	0.9362549800796812	0.7110438729198184
