# Supplementary material for: An Improved Hybrid Feature Selection Algorithm for Electric Charge Recovery Risk
Source: Hindawi journal article supplement (doi:10.1155/2020/8479341), 2020-08-28
Supplement: f1 [file 8479341.f1.zip › 8479341.f1/Experimental Results/201807/BPSO_SBS_results.csv]

features_num	Accuracy_high	Loss_high	Precission_high	Recall_high	F1_high	Accuracy_med	Loss_med	Precission_med	Recall_med	F1_med	Accuracy_low	Loss_low	Precission_low	Recall_low	F1_low
362	1	0	1	1	1	0.841743119	0.158256881	1	0.841743119	0.914072229	0.959126428	0.040873572	0.551847437	0.935353535	0.694152924
361	1	0	1	1	1	0.844290657	0.155709343	1	0.844290657	0.915572233	0.960148193	0.039851807	0.561151079	0.936	0.701649175
361	1	0	1	1	1	0.844290657	0.155709343	1	0.844290657	0.915572233	0.960148193	0.039851807	0.561151079	0.936	0.701649175
360	1	0	1	1	1	0.845859873	0.154140127	1	0.845859873	0.916494134	0.973085709	0.026914291	0.700645161	0.932989691	0.800294768
360	1	0	1	1	1	0.845859873	0.154140127	1	0.845859873	0.916494134	0.973085709	0.026914291	0.700645161	0.932989691	0.800294768
360	1	0	1	1	1	0.845859873	0.154140127	1	0.845859873	0.916494134	0.973085709	0.026914291	0.700645161	0.932989691	0.800294768
360	1	0	1	1	1	0.845859873	0.154140127	1	0.845859873	0.916494134	0.973085709	0.026914291	0.700645161	0.932989691	0.800294768
360	1	0	1	1	1	0.845859873	0.154140127	1	0.845859873	0.916494134	0.973085709	0.026914291	0.700645161	0.932989691	0.800294768
360	1	0	1	1	1	0.845859873	0.154140127	1	0.845859873	0.916494134	0.973085709	0.026914291	0.700645161	0.932989691	0.800294768
360	1	0	1	1	1	0.845859873	0.154140127	1	0.845859873	0.916494134	0.973085709	0.026914291	0.700645161	0.932989691	0.800294768
360	1	0	1	1	1	0.845859873	0.154140127	1	0.845859873	0.916494134	0.973085709	0.026914291	0.700645161	0.932989691	0.800294768
360	1	0	1	1	1	0.845859873	0.154140127	1	0.845859873	0.916494134	0.973085709	0.026914291	0.700645161	0.932989691	0.800294768
360	1	0	1	1	1	0.845859873	0.154140127	1	0.845859873	0.916494134	0.973085709	0.026914291	0.700645161	0.932989691	0.800294768
360	1	0	1	1	1	0.845859873	0.154140127	1	0.845859873	0.916494134	0.973085709	0.026914291	0.700645161	0.932989691	0.800294768
360	1	0	1	1	1	0.845859873	0.154140127	1	0.845859873	0.916494134	0.973085709	0.026914291	0.700645161	0.932989691	0.800294768
360	1	0	1	1	1	0.845859873	0.154140127	1	0.845859873	0.916494134	0.973085709	0.026914291	0.700645161	0.932989691	0.800294768
360	1	0	1	1	1	0.845859873	0.154140127	1	0.845859873	0.916494134	0.973085709	0.026914291	0.700645161	0.932989691	0.800294768
360	1	0	1	1	1	0.845859873	0.154140127	1	0.845859873	0.916494134	0.973085709	0.026914291	0.700645161	0.932989691	0.800294768
360	1	0	1	1	1	0.845859873	0.154140127	1	0.845859873	0.916494134	0.973085709	0.026914291	0.700645161	0.932989691	0.800294768
360	1	0	1	1	1	0.845859873	0.154140127	1	0.845859873	0.916494134	0.973085709	0.026914291	0.700645161	0.932989691	0.800294768
360	1	0	1	1	1	0.845859873	0.154140127	1	0.845859873	0.916494134	0.973085709	0.026914291	0.700645161	0.932989691	0.800294768
360	1	0	1	1	1	0.845859873	0.154140127	1	0.845859873	0.916494134	0.973085709	0.026914291	0.700645161	0.932989691	0.800294768
360	1	0	1	1	1	0.845859873	0.154140127	1	0.845859873	0.916494134	0.973085709	0.026914291	0.700645161	0.932989691	0.800294768
360	1	0	1	1	1	0.845859873	0.154140127	1	0.845859873	0.916494134	0.973085709	0.026914291	0.700645161	0.932989691	0.800294768
360	1	0	1	1	1	0.845859873	0.154140127	1	0.845859873	0.916494134	0.973085709	0.026914291	0.700645161	0.932989691	0.800294768
360	1	0	1	1	1	0.845859873	0.154140127	1	0.845859873	0.916494134	0.973085709	0.026914291	0.700645161	0.932989691	0.800294768
360	1	0	1	1	1	0.845859873	0.154140127	1	0.845859873	0.916494134	0.973085709	0.026914291	0.700645161	0.932989691	0.800294768
360	1	0	1	1	1	0.845859873	0.154140127	1	0.845859873	0.916494134	0.973085709	0.026914291	0.700645161	0.932989691	0.800294768
360	1	0	1	1	1	0.845859873	0.154140127	1	0.845859873	0.916494134	0.973085709	0.026914291	0.700645161	0.932989691	0.800294768
360	1	0	1	1	1	0.845859873	0.154140127	1	0.845859873	0.916494134	0.973085709	0.026914291	0.700645161	0.932989691	0.800294768
360	1	0	1	1	1	0.845859873	0.154140127	1	0.845859873	0.916494134	0.973085709	0.026914291	0.700645161	0.932989691	0.800294768
360	1	0	1	1	1	0.845859873	0.154140127	1	0.845859873	0.916494134	0.973085709	0.026914291	0.700645161	0.932989691	0.800294768
360	1	0	1	1	1	0.845859873	0.154140127	1	0.845859873	0.916494134	0.973085709	0.026914291	0.700645161	0.932989691	0.800294768
360	1	0	1	1	1	0.845859873	0.154140127	1	0.845859873	0.916494134	0.973085709	0.026914291	0.700645161	0.932989691	0.800294768
360	1	0	1	1	1	0.845859873	0.154140127	1	0.845859873	0.916494134	0.973085709	0.026914291	0.700645161	0.932989691	0.800294768
360	1	0	1	1	1	0.845859873	0.154140127	1	0.845859873	0.916494134	0.973085709	0.026914291	0.700645161	0.932989691	0.800294768
360	1	0	1	1	1	0.845859873	0.154140127	1	0.845859873	0.916494134	0.973085709	0.026914291	0.700645161	0.932989691	0.800294768
360	1	0	1	1	1	0.845859873	0.154140127	1	0.845859873	0.916494134	0.973085709	0.026914291	0.700645161	0.932989691	0.800294768
360	1	0	1	1	1	0.845859873	0.154140127	1	0.845859873	0.916494134	0.973085709	0.026914291	0.700645161	0.932989691	0.800294768
360	1	0	1	1	1	0.845859873	0.154140127	1	0.845859873	0.916494134	0.973085709	0.026914291	0.700645161	0.932989691	0.800294768
360	1	0	1	1	1	0.845859873	0.154140127	1	0.845859873	0.916494134	0.973085709	0.026914291	0.700645161	0.932989691	0.800294768
360	1	0	1	1	1	0.845859873	0.154140127	1	0.845859873	0.916494134	0.973085709	0.026914291	0.700645161	0.932989691	0.800294768
360	1	0	1	1	1	0.845859873	0.154140127	1	0.845859873	0.916494134	0.973085709	0.026914291	0.700645161	0.932989691	0.800294768
360	1	0	1	1	1	0.845859873	0.154140127	1	0.845859873	0.916494134	0.973085709	0.026914291	0.700645161	0.932989691	0.800294768
360	1	0	1	1	1	0.845859873	0.154140127	1	0.845859873	0.916494134	0.973085709	0.026914291	0.700645161	0.932989691	0.800294768
360	1	0	1	1	1	0.845859873	0.154140127	1	0.845859873	0.916494134	0.973085709	0.026914291	0.700645161	0.932989691	0.800294768
360	1	0	1	1	1	0.845859873	0.154140127	1	0.845859873	0.916494134	0.973085709	0.026914291	0.700645161	0.932989691	0.800294768
360	1	0	1	1	1	0.845859873	0.154140127	1	0.845859873	0.916494134	0.973085709	0.026914291	0.700645161	0.932989691	0.800294768
360	1	0	1	1	1	0.845859873	0.154140127	1	0.845859873	0.916494134	0.973085709	0.026914291	0.700645161	0.932989691	0.800294768
360	1	0	1	1	1	0.845859873	0.154140127	1	0.845859873	0.916494134	0.973085709	0.026914291	0.700645161	0.932989691	0.800294768
360	1	0	1	1	1	0.845859873	0.154140127	1	0.845859873	0.916494134	0.973085709	0.026914291	0.700645161	0.932989691	0.800294768
360	1	0	1	1	1	0.845859873	0.154140127	1	0.845859873	0.916494134	0.973085709	0.026914291	0.700645161	0.932989691	0.800294768
360	1	0	1	1	1	0.845859873	0.154140127	1	0.845859873	0.916494134	0.973085709	0.026914291	0.700645161	0.932989691	0.800294768
360	1	0	1	1	1	0.845859873	0.154140127	1	0.845859873	0.916494134	0.973085709	0.026914291	0.700645161	0.932989691	0.800294768
360	1	0	1	1	1	0.845859873	0.154140127	1	0.845859873	0.916494134	0.973085709	0.026914291	0.700645161	0.932989691	0.800294768
360	1	0	1	1	1	0.845859873	0.154140127	1	0.845859873	0.916494134	0.973085709	0.026914291	0.700645161	0.932989691	0.800294768
360	1	0	1	1	1	0.845859873	0.154140127	1	0.845859873	0.916494134	0.973085709	0.026914291	0.700645161	0.932989691	0.800294768
360	1	0	1	1	1	0.845859873	0.154140127	1	0.845859873	0.916494134	0.973085709	0.026914291	0.700645161	0.932989691	0.800294768
360	1	0	1	1	1	0.845859873	0.154140127	1	0.845859873	0.916494134	0.973085709	0.026914291	0.700645161	0.932989691	0.800294768
360	1	0	1	1	1	0.845859873	0.154140127	1	0.845859873	0.916494134	0.973085709	0.026914291	0.700645161	0.932989691	0.800294768
360	1	0	1	1	1	0.845859873	0.154140127	1	0.845859873	0.916494134	0.973085709	0.026914291	0.700645161	0.932989691	0.800294768
360	1	0	1	1	1	0.845859873	0.154140127	1	0.845859873	0.916494134	0.973085709	0.026914291	0.700645161	0.932989691	0.800294768
360	1	0	1	1	1	0.845859873	0.154140127	1	0.845859873	0.916494134	0.973085709	0.026914291	0.700645161	0.932989691	0.800294768
360	1	0	1	1	1	0.845859873	0.154140127	1	0.845859873	0.916494134	0.973085709	0.026914291	0.700645161	0.932989691	0.800294768
360	1	0	1	1	1	0.845859873	0.154140127	1	0.845859873	0.916494134	0.973085709	0.026914291	0.700645161	0.932989691	0.800294768
360	1	0	1	1	1	0.845859873	0.154140127	1	0.845859873	0.916494134	0.973085709	0.026914291	0.700645161	0.932989691	0.800294768
360	1	0	1	1	1	0.845859873	0.154140127	1	0.845859873	0.916494134	0.973085709	0.026914291	0.700645161	0.932989691	0.800294768
360	1	0	1	1	1	0.845859873	0.154140127	1	0.845859873	0.916494134	0.973085709	0.026914291	0.700645161	0.932989691	0.800294768
360	1	0	1	1	1	0.845859873	0.154140127	1	0.845859873	0.916494134	0.973085709	0.026914291	0.700645161	0.932989691	0.800294768
360	1	0	1	1	1	0.845859873	0.154140127	1	0.845859873	0.916494134	0.973085709	0.026914291	0.700645161	0.932989691	0.800294768
360	1	0	1	1	1	0.845859873	0.154140127	1	0.845859873	0.916494134	0.973085709	0.026914291	0.700645161	0.932989691	0.800294768
360	1	0	1	1	1	0.845859873	0.154140127	1	0.845859873	0.916494134	0.973085709	0.026914291	0.700645161	0.932989691	0.800294768
360	1	0	1	1	1	0.845859873	0.154140127	1	0.845859873	0.916494134	0.973085709	0.026914291	0.700645161	0.932989691	0.800294768
360	1	0	1	1	1	0.845859873	0.154140127	1	0.845859873	0.916494134	0.973085709	0.026914291	0.700645161	0.932989691	0.800294768
360	1	0	1	1	1	0.845859873	0.154140127	1	0.845859873	0.916494134	0.973085709	0.026914291	0.700645161	0.932989691	0.800294768
360	1	0	1	1	1	0.845859873	0.154140127	1	0.845859873	0.916494134	0.973085709	0.026914291	0.700645161	0.932989691	0.800294768
360	1	0	1	1	1	0.845859873	0.154140127	1	0.845859873	0.916494134	0.973085709	0.026914291	0.700645161	0.932989691	0.800294768
360	1	0	1	1	1	0.845859873	0.154140127	1	0.845859873	0.916494134	0.973085709	0.026914291	0.700645161	0.932989691	0.800294768
360	1	0	1	1	1	0.845859873	0.154140127	1	0.845859873	0.916494134	0.973085709	0.026914291	0.700645161	0.932989691	0.800294768
360	1	0	1	1	1	0.845859873	0.154140127	1	0.845859873	0.916494134	0.973085709	0.026914291	0.700645161	0.932989691	0.800294768
360	1	0	1	1	1	0.845859873	0.154140127	1	0.845859873	0.916494134	0.973085709	0.026914291	0.700645161	0.932989691	0.800294768
360	1	0	1	1	1	0.845859873	0.154140127	1	0.845859873	0.916494134	0.973085709	0.026914291	0.700645161	0.932989691	0.800294768
360	1	0	1	1	1	0.845859873	0.154140127	1	0.845859873	0.916494134	0.973085709	0.026914291	0.700645161	0.932989691	0.800294768
360	1	0	1	1	1	0.845859873	0.154140127	1	0.845859873	0.916494134	0.973085709	0.026914291	0.700645161	0.932989691	0.800294768
360	1	0	1	1	1	0.845859873	0.154140127	1	0.845859873	0.916494134	0.973085709	0.026914291	0.700645161	0.932989691	0.800294768
360	1	0	1	1	1	0.845859873	0.154140127	1	0.845859873	0.916494134	0.973085709	0.026914291	0.700645161	0.932989691	0.800294768
360	1	0	1	1	1	0.845859873	0.154140127	1	0.845859873	0.916494134	0.973085709	0.026914291	0.700645161	0.932989691	0.800294768
360	1	0	1	1	1	0.845859873	0.154140127	1	0.845859873	0.916494134	0.973085709	0.026914291	0.700645161	0.932989691	0.800294768
360	1	0	1	1	1	0.845859873	0.154140127	1	0.845859873	0.916494134	0.973085709	0.026914291	0.700645161	0.932989691	0.800294768
360	1	0	1	1	1	0.845859873	0.154140127	1	0.845859873	0.916494134	0.973085709	0.026914291	0.700645161	0.932989691	0.800294768
360	1	0	1	1	1	0.845859873	0.154140127	1	0.845859873	0.916494134	0.973085709	0.026914291	0.700645161	0.932989691	0.800294768
360	1	0	1	1	1	0.845859873	0.154140127	1	0.845859873	0.916494134	0.973085709	0.026914291	0.700645161	0.932989691	0.800294768
360	1	0	1	1	1	0.845859873	0.154140127	1	0.845859873	0.916494134	0.973085709	0.026914291	0.700645161	0.932989691	0.800294768
360	1	0	1	1	1	0.845859873	0.154140127	1	0.845859873	0.916494134	0.973085709	0.026914291	0.700645161	0.932989691	0.800294768
360	1	0	1	1	1	0.845859873	0.154140127	1	0.845859873	0.916494134	0.973085709	0.026914291	0.700645161	0.932989691	0.800294768
360	1	0	1	1	1	0.845859873	0.154140127	1	0.845859873	0.916494134	0.973085709	0.026914291	0.700645161	0.932989691	0.800294768
360	1	0	1	1	1	0.845859873	0.154140127	1	0.845859873	0.916494134	0.973085709	0.026914291	0.700645161	0.932989691	0.800294768
360	1	0	1	1	1	0.845859873	0.154140127	1	0.845859873	0.916494134	0.973085709	0.026914291	0.700645161	0.932989691	0.800294768
360	1	0	1	1	1	0.845859873	0.154140127	1	0.845859873	0.916494134	0.973085709	0.026914291	0.700645161	0.932989691	0.800294768
360	1	0	1	1	1	0.845859873	0.154140127	1	0.845859873	0.916494134	0.973085709	0.026914291	0.700645161	0.932989691	0.800294768
360	1	0	1	1	1	0.845859873	0.154140127	1	0.845859873	0.916494134	0.973085709	0.026914291	0.700645161	0.932989691	0.800294768
360	1	0	1	1	1	0.845859873	0.154140127	1	0.845859873	0.916494134	0.973085709	0.026914291	0.700645161	0.932989691	0.800294768
360	1	0	1	1	1	0.845859873	0.154140127	1	0.845859873	0.916494134	0.973085709	0.026914291	0.700645161	0.932989691	0.800294768
360	1	0	1	1	1	0.845859873	0.154140127	1	0.845859873	0.916494134	0.973085709	0.026914291	0.700645161	0.932989691	0.800294768
360	1	0	1	1	1	0.845859873	0.154140127	1	0.845859873	0.916494134	0.973085709	0.026914291	0.700645161	0.932989691	0.800294768
360	1	0	1	1	1	0.845859873	0.154140127	1	0.845859873	0.916494134	0.973085709	0.026914291	0.700645161	0.932989691	0.800294768
360	1	0	1	1	1	0.845859873	0.154140127	1	0.845859873	0.916494134	0.973085709	0.026914291	0.700645161	0.932989691	0.800294768
360	1	0	1	1	1	0.845859873	0.154140127	1	0.845859873	0.916494134	0.973085709	0.026914291	0.700645161	0.932989691	0.800294768
360	1	0	1	1	1	0.845859873	0.154140127	1	0.845859873	0.916494134	0.973085709	0.026914291	0.700645161	0.932989691	0.800294768
360	1	0	1	1	1	0.845859873	0.154140127	1	0.845859873	0.916494134	0.973085709	0.026914291	0.700645161	0.932989691	0.800294768
360	1	0	1	1	1	0.845859873	0.154140127	1	0.845859873	0.916494134	0.973085709	0.026914291	0.700645161	0.932989691	0.800294768
360	1	0	1	1	1	0.845859873	0.154140127	1	0.845859873	0.916494134	0.973085709	0.026914291	0.700645161	0.932989691	0.800294768
360	1	0	1	1	1	0.845859873	0.154140127	1	0.845859873	0.916494134	0.973085709	0.026914291	0.700645161	0.932989691	0.800294768
360	1	0	1	1	1	0.845859873	0.154140127	1	0.845859873	0.916494134	0.973085709	0.026914291	0.700645161	0.932989691	0.800294768
360	1	0	1	1	1	0.845859873	0.154140127	1	0.845859873	0.916494134	0.973085709	0.026914291	0.700645161	0.932989691	0.800294768
359	1	0	1	1	1	0.845070423	0.154929577	1	0.845070423	0.916030534	0.974684801	0.025315199	0.716906946	0.933447099	0.81097109
359	1	0	1	1	1	0.845070423	0.154929577	1	0.845070423	0.916030534	0.974684801	0.025315199	0.716906946	0.933447099	0.81097109
359	1	0	1	1	1	0.845070423	0.154929577	1	0.845070423	0.916030534	0.974684801	0.025315199	0.716906946	0.933447099	0.81097109
359	1	0	1	1	1	0.845070423	0.154929577	1	0.845070423	0.916030534	0.974684801	0.025315199	0.716906946	0.933447099	0.81097109
359	1	0	1	1	1	0.845070423	0.154929577	1	0.845070423	0.916030534	0.974684801	0.025315199	0.716906946	0.933447099	0.81097109
359	1	0	1	1	1	0.845070423	0.154929577	1	0.845070423	0.916030534	0.974684801	0.025315199	0.716906946	0.933447099	0.81097109
359	1	0	1	1	1	0.845070423	0.154929577	1	0.845070423	0.916030534	0.974684801	0.025315199	0.716906946	0.933447099	0.81097109
359	1	0	1	1	1	0.845070423	0.154929577	1	0.845070423	0.916030534	0.974684801	0.025315199	0.716906946	0.933447099	0.81097109
359	1	0	1	1	1	0.845070423	0.154929577	1	0.845070423	0.916030534	0.974684801	0.025315199	0.716906946	0.933447099	0.81097109
359	1	0	1	1	1	0.845070423	0.154929577	1	0.845070423	0.916030534	0.974684801	0.025315199	0.716906946	0.933447099	0.81097109
359	1	0	1	1	1	0.845070423	0.154929577	1	0.845070423	0.916030534	0.974684801	0.025315199	0.716906946	0.933447099	0.81097109
359	1	0	1	1	1	0.845070423	0.154929577	1	0.845070423	0.916030534	0.974684801	0.025315199	0.716906946	0.933447099	0.81097109
359	1	0	1	1	1	0.845070423	0.154929577	1	0.845070423	0.916030534	0.974684801	0.025315199	0.716906946	0.933447099	0.81097109
359	1	0	1	1	1	0.845070423	0.154929577	1	0.845070423	0.916030534	0.974684801	0.025315199	0.716906946	0.933447099	0.81097109
359	1	0	1	1	1	0.845070423	0.154929577	1	0.845070423	0.916030534	0.974684801	0.025315199	0.716906946	0.933447099	0.81097109
359	1	0	1	1	1	0.845070423	0.154929577	1	0.845070423	0.916030534	0.974684801	0.025315199	0.716906946	0.933447099	0.81097109
358	1	0	1	1	1	0.846350832	0.153649168	1	0.846350832	0.916782247	0.974585526	0.025414474	0.715968586	0.933447099	0.81037037
358	1	0	1	1	1	0.846350832	0.153649168	1	0.846350832	0.916782247	0.974585526	0.025414474	0.715968586	0.933447099	0.81037037
358	1	0	1	1	1	0.846350832	0.153649168	1	0.846350832	0.916782247	0.974585526	0.025414474	0.715968586	0.933447099	0.81037037
358	1	0	1	1	1	0.846350832	0.153649168	1	0.846350832	0.916782247	0.974585526	0.025414474	0.715968586	0.933447099	0.81037037
358	1	0	1	1	1	0.846350832	0.153649168	1	0.846350832	0.916782247	0.974585526	0.025414474	0.715968586	0.933447099	0.81037037
357	1	0	1	1	1	0.824631861	0.175368139	1	0.824631861	0.903888481	0.979321262	0.020678738	0.777327935	0.929032258	0.846436444
357	1	0	1	1	1	0.824631861	0.175368139	1	0.824631861	0.903888481	0.979321262	0.020678738	0.777327935	0.929032258	0.846436444
357	1	0	1	1	1	0.824631861	0.175368139	1	0.824631861	0.903888481	0.979321262	0.020678738	0.777327935	0.929032258	0.846436444
357	1	0	1	1	1	0.824631861	0.175368139	1	0.824631861	0.903888481	0.979321262	0.020678738	0.777327935	0.929032258	0.846436444
357	1	0	1	1	1	0.824631861	0.175368139	1	0.824631861	0.903888481	0.979321262	0.020678738	0.777327935	0.929032258	0.846436444
357	1	0	1	1	1	0.824631861	0.175368139	1	0.824631861	0.903888481	0.979321262	0.020678738	0.777327935	0.929032258	0.846436444
357	1	0	1	1	1	0.824631861	0.175368139	1	0.824631861	0.903888481	0.979321262	0.020678738	0.777327935	0.929032258	0.846436444
357	1	0	1	1	1	0.824631861	0.175368139	1	0.824631861	0.903888481	0.979321262	0.020678738	0.777327935	0.929032258	0.846436444
357	1	0	1	1	1	0.824631861	0.175368139	1	0.824631861	0.903888481	0.979321262	0.020678738	0.777327935	0.929032258	0.846436444
357	1	0	1	1	1	0.824631861	0.175368139	1	0.824631861	0.903888481	0.979321262	0.020678738	0.777327935	0.929032258	0.846436444
357	1	0	1	1	1	0.824631861	0.175368139	1	0.824631861	0.903888481	0.979321262	0.020678738	0.777327935	0.929032258	0.846436444
357	1	0	1	1	1	0.824631861	0.175368139	1	0.824631861	0.903888481	0.979321262	0.020678738	0.777327935	0.929032258	0.846436444
357	1	0	1	1	1	0.824631861	0.175368139	1	0.824631861	0.903888481	0.979321262	0.020678738	0.777327935	0.929032258	0.846436444
356	1	0	1	1	1	0.820855615	0.179144385	1	0.820855615	0.901615272	0.979715021	0.020284979	0.780487805	0.930533118	0.848931466
356	1	0	1	1	1	0.820855615	0.179144385	1	0.820855615	0.901615272	0.979715021	0.020284979	0.780487805	0.930533118	0.848931466
356	1	0	1	1	1	0.820855615	0.179144385	1	0.820855615	0.901615272	0.979715021	0.020284979	0.780487805	0.930533118	0.848931466
356	1	0	1	1	1	0.820855615	0.179144385	1	0.820855615	0.901615272	0.979715021	0.020284979	0.780487805	0.930533118	0.848931466
356	1	0	1	1	1	0.820855615	0.179144385	1	0.820855615	0.901615272	0.979715021	0.020284979	0.780487805	0.930533118	0.848931466
356	1	0	1	1	1	0.820855615	0.179144385	1	0.820855615	0.901615272	0.979715021	0.020284979	0.780487805	0.930533118	0.848931466
356	1	0	1	1	1	0.820855615	0.179144385	1	0.820855615	0.901615272	0.979715021	0.020284979	0.780487805	0.930533118	0.848931466
356	1	0	1	1	1	0.820855615	0.179144385	1	0.820855615	0.901615272	0.979715021	0.020284979	0.780487805	0.930533118	0.848931466
356	1	0	1	1	1	0.820855615	0.179144385	1	0.820855615	0.901615272	0.979715021	0.020284979	0.780487805	0.930533118	0.848931466
356	1	0	1	1	1	0.820855615	0.179144385	1	0.820855615	0.901615272	0.979715021	0.020284979	0.780487805	0.930533118	0.848931466
356	1	0	1	1	1	0.820855615	0.179144385	1	0.820855615	0.901615272	0.979715021	0.020284979	0.780487805	0.930533118	0.848931466
356	1	0	1	1	1	0.820855615	0.179144385	1	0.820855615	0.901615272	0.979715021	0.020284979	0.780487805	0.930533118	0.848931466
356	1	0	1	1	1	0.820855615	0.179144385	1	0.820855615	0.901615272	0.979715021	0.020284979	0.780487805	0.930533118	0.848931466
356	1	0	1	1	1	0.820855615	0.179144385	1	0.820855615	0.901615272	0.979715021	0.020284979	0.780487805	0.930533118	0.848931466
356	1	0	1	1	1	0.820855615	0.179144385	1	0.820855615	0.901615272	0.979715021	0.020284979	0.780487805	0.930533118	0.848931466
356	1	0	1	1	1	0.820855615	0.179144385	1	0.820855615	0.901615272	0.979715021	0.020284979	0.780487805	0.930533118	0.848931466
356	1	0	1	1	1	0.820855615	0.179144385	1	0.820855615	0.901615272	0.979715021	0.020284979	0.780487805	0.930533118	0.848931466
356	1	0	1	1	1	0.820855615	0.179144385	1	0.820855615	0.901615272	0.979715021	0.020284979	0.780487805	0.930533118	0.848931466
356	1	0	1	1	1	0.820855615	0.179144385	1	0.820855615	0.901615272	0.979715021	0.020284979	0.780487805	0.930533118	0.848931466
356	1	0	1	1	1	0.820855615	0.179144385	1	0.820855615	0.901615272	0.979715021	0.020284979	0.780487805	0.930533118	0.848931466
356	1	0	1	1	1	0.820855615	0.179144385	1	0.820855615	0.901615272	0.979715021	0.020284979	0.780487805	0.930533118	0.848931466
356	1	0	1	1	1	0.820855615	0.179144385	1	0.820855615	0.901615272	0.979715021	0.020284979	0.780487805	0.930533118	0.848931466
356	1	0	1	1	1	0.820855615	0.179144385	1	0.820855615	0.901615272	0.979715021	0.020284979	0.780487805	0.930533118	0.848931466
356	1	0	1	1	1	0.820855615	0.179144385	1	0.820855615	0.901615272	0.979715021	0.020284979	0.780487805	0.930533118	0.848931466
356	1	0	1	1	1	0.820855615	0.179144385	1	0.820855615	0.901615272	0.979715021	0.020284979	0.780487805	0.930533118	0.848931466
356	1	0	1	1	1	0.820855615	0.179144385	1	0.820855615	0.901615272	0.979715021	0.020284979	0.780487805	0.930533118	0.848931466
356	1	0	1	1	1	0.820855615	0.179144385	1	0.820855615	0.901615272	0.979715021	0.020284979	0.780487805	0.930533118	0.848931466
356	1	0	1	1	1	0.820855615	0.179144385	1	0.820855615	0.901615272	0.979715021	0.020284979	0.780487805	0.930533118	0.848931466
356	1	0	1	1	1	0.820855615	0.179144385	1	0.820855615	0.901615272	0.979715021	0.020284979	0.780487805	0.930533118	0.848931466
356	1	0	1	1	1	0.820855615	0.179144385	1	0.820855615	0.901615272	0.979715021	0.020284979	0.780487805	0.930533118	0.848931466
356	1	0	1	1	1	0.820855615	0.179144385	1	0.820855615	0.901615272	0.979715021	0.020284979	0.780487805	0.930533118	0.848931466
356	1	0	1	1	1	0.820855615	0.179144385	1	0.820855615	0.901615272	0.979715021	0.020284979	0.780487805	0.930533118	0.848931466
356	1	0	1	1	1	0.820855615	0.179144385	1	0.820855615	0.901615272	0.979715021	0.020284979	0.780487805	0.930533118	0.848931466
356	1	0	1	1	1	0.820855615	0.179144385	1	0.820855615	0.901615272	0.979715021	0.020284979	0.780487805	0.930533118	0.848931466
356	1	0	1	1	1	0.820855615	0.179144385	1	0.820855615	0.901615272	0.979715021	0.020284979	0.780487805	0.930533118	0.848931466
355	1	0	1	1	1	0.811813187	0.188186813	1	0.811813187	0.896133434	0.981137665	0.018862335	0.805177112	0.924882629	0.860888565
355	1	0	1	1	1	0.811813187	0.188186813	1	0.811813187	0.896133434	0.981137665	0.018862335	0.805177112	0.924882629	0.860888565
355	1	0	1	1	1	0.811813187	0.188186813	1	0.811813187	0.896133434	0.981137665	0.018862335	0.805177112	0.924882629	0.860888565
355	1	0	1	1	1	0.811813187	0.188186813	1	0.811813187	0.896133434	0.981137665	0.018862335	0.805177112	0.924882629	0.860888565
355	1	0	1	1	1	0.811813187	0.188186813	1	0.811813187	0.896133434	0.981137665	0.018862335	0.805177112	0.924882629	0.860888565
355	1	0	1	1	1	0.811813187	0.188186813	1	0.811813187	0.896133434	0.981137665	0.018862335	0.805177112	0.924882629	0.860888565
355	1	0	1	1	1	0.811813187	0.188186813	1	0.811813187	0.896133434	0.981137665	0.018862335	0.805177112	0.924882629	0.860888565
355	1	0	1	1	1	0.811813187	0.188186813	1	0.811813187	0.896133434	0.981137665	0.018862335	0.805177112	0.924882629	0.860888565
355	1	0	1	1	1	0.811813187	0.188186813	1	0.811813187	0.896133434	0.981137665	0.018862335	0.805177112	0.924882629	0.860888565
355	1	0	1	1	1	0.811813187	0.188186813	1	0.811813187	0.896133434	0.981137665	0.018862335	0.805177112	0.924882629	0.860888565
355	1	0	1	1	1	0.811813187	0.188186813	1	0.811813187	0.896133434	0.981137665	0.018862335	0.805177112	0.924882629	0.860888565
355	1	0	1	1	1	0.811813187	0.188186813	1	0.811813187	0.896133434	0.981137665	0.018862335	0.805177112	0.924882629	0.860888565
355	1	0	1	1	1	0.811813187	0.188186813	1	0.811813187	0.896133434	0.981137665	0.018862335	0.805177112	0.924882629	0.860888565
355	1	0	1	1	1	0.811813187	0.188186813	1	0.811813187	0.896133434	0.981137665	0.018862335	0.805177112	0.924882629	0.860888565
355	1	0	1	1	1	0.811813187	0.188186813	1	0.811813187	0.896133434	0.981137665	0.018862335	0.805177112	0.924882629	0.860888565
355	1	0	1	1	1	0.811813187	0.188186813	1	0.811813187	0.896133434	0.981137665	0.018862335	0.805177112	0.924882629	0.860888565
355	1	0	1	1	1	0.811813187	0.188186813	1	0.811813187	0.896133434	0.981137665	0.018862335	0.805177112	0.924882629	0.860888565
355	1	0	1	1	1	0.811813187	0.188186813	1	0.811813187	0.896133434	0.981137665	0.018862335	0.805177112	0.924882629	0.860888565
355	1	0	1	1	1	0.811813187	0.188186813	1	0.811813187	0.896133434	0.981137665	0.018862335	0.805177112	0.924882629	0.860888565
355	1	0	1	1	1	0.811813187	0.188186813	1	0.811813187	0.896133434	0.981137665	0.018862335	0.805177112	0.924882629	0.860888565
355	1	0	1	1	1	0.811813187	0.188186813	1	0.811813187	0.896133434	0.981137665	0.018862335	0.805177112	0.924882629	0.860888565
355	1	0	1	1	1	0.811813187	0.188186813	1	0.811813187	0.896133434	0.981137665	0.018862335	0.805177112	0.924882629	0.860888565
355	1	0	1	1	1	0.811813187	0.188186813	1	0.811813187	0.896133434	0.981137665	0.018862335	0.805177112	0.924882629	0.860888565
355	1	0	1	1	1	0.811813187	0.188186813	1	0.811813187	0.896133434	0.981137665	0.018862335	0.805177112	0.924882629	0.860888565
355	1	0	1	1	1	0.811813187	0.188186813	1	0.811813187	0.896133434	0.981137665	0.018862335	0.805177112	0.924882629	0.860888565
355	1	0	1	1	1	0.811813187	0.188186813	1	0.811813187	0.896133434	0.981137665	0.018862335	0.805177112	0.924882629	0.860888565
355	1	0	1	1	1	0.811813187	0.188186813	1	0.811813187	0.896133434	0.981137665	0.018862335	0.805177112	0.924882629	0.860888565
355	1	0	1	1	1	0.811813187	0.188186813	1	0.811813187	0.896133434	0.981137665	0.018862335	0.805177112	0.924882629	0.860888565
355	1	0	1	1	1	0.811813187	0.188186813	1	0.811813187	0.896133434	0.981137665	0.018862335	0.805177112	0.924882629	0.860888565
355	1	0	1	1	1	0.811813187	0.188186813	1	0.811813187	0.896133434	0.981137665	0.018862335	0.805177112	0.924882629	0.860888565
355	1	0	1	1	1	0.811813187	0.188186813	1	0.811813187	0.896133434	0.981137665	0.018862335	0.805177112	0.924882629	0.860888565
355	1	0	1	1	1	0.811813187	0.188186813	1	0.811813187	0.896133434	0.981137665	0.018862335	0.805177112	0.924882629	0.860888565
355	1	0	1	1	1	0.811813187	0.188186813	1	0.811813187	0.896133434	0.981137665	0.018862335	0.805177112	0.924882629	0.860888565
355	1	0	1	1	1	0.811813187	0.188186813	1	0.811813187	0.896133434	0.981137665	0.018862335	0.805177112	0.924882629	0.860888565
355	1	0	1	1	1	0.811813187	0.188186813	1	0.811813187	0.896133434	0.981137665	0.018862335	0.805177112	0.924882629	0.860888565
355	1	0	1	1	1	0.811813187	0.188186813	1	0.811813187	0.896133434	0.981137665	0.018862335	0.805177112	0.924882629	0.860888565
355	1	0	1	1	1	0.811813187	0.188186813	1	0.811813187	0.896133434	0.981137665	0.018862335	0.805177112	0.924882629	0.860888565
355	1	0	1	1	1	0.811813187	0.188186813	1	0.811813187	0.896133434	0.981137665	0.018862335	0.805177112	0.924882629	0.860888565
354	1	0	1	1	1	0.8	0.2	1	0.8	0.888888889	0.982937173	0.017062827	0.829436039	0.924846626	0.874546773
354	1	0	1	1	1	0.8	0.2	1	0.8	0.888888889	0.982937173	0.017062827	0.829436039	0.924846626	0.874546773
354	1	0	1	1	1	0.8	0.2	1	0.8	0.888888889	0.982937173	0.017062827	0.829436039	0.924846626	0.874546773
354	1	0	1	1	1	0.8	0.2	1	0.8	0.888888889	0.982937173	0.017062827	0.829436039	0.924846626	0.874546773
354	1	0	1	1	1	0.8	0.2	1	0.8	0.888888889	0.982937173	0.017062827	0.829436039	0.924846626	0.874546773
354	1	0	1	1	1	0.8	0.2	1	0.8	0.888888889	0.982937173	0.017062827	0.829436039	0.924846626	0.874546773
354	1	0	1	1	1	0.8	0.2	1	0.8	0.888888889	0.982937173	0.017062827	0.829436039	0.924846626	0.874546773
354	1	0	1	1	1	0.8	0.2	1	0.8	0.888888889	0.982937173	0.017062827	0.829436039	0.924846626	0.874546773
354	1	0	1	1	1	0.8	0.2	1	0.8	0.888888889	0.982937173	0.017062827	0.829436039	0.924846626	0.874546773
354	1	0	1	1	1	0.8	0.2	1	0.8	0.888888889	0.982937173	0.017062827	0.829436039	0.924846626	0.874546773
354	1	0	1	1	1	0.8	0.2	1	0.8	0.888888889	0.982937173	0.017062827	0.829436039	0.924846626	0.874546773
354	1	0	1	1	1	0.8	0.2	1	0.8	0.888888889	0.982937173	0.017062827	0.829436039	0.924846626	0.874546773
354	1	0	1	1	1	0.8	0.2	1	0.8	0.888888889	0.982937173	0.017062827	0.829436039	0.924846626	0.874546773
354	1	0	1	1	1	0.8	0.2	1	0.8	0.888888889	0.982937173	0.017062827	0.829436039	0.924846626	0.874546773
354	1	0	1	1	1	0.8	0.2	1	0.8	0.888888889	0.982937173	0.017062827	0.829436039	0.924846626	0.874546773
354	1	0	1	1	1	0.8	0.2	1	0.8	0.888888889	0.982937173	0.017062827	0.829436039	0.924846626	0.874546773
354	1	0	1	1	1	0.8	0.2	1	0.8	0.888888889	0.982937173	0.017062827	0.829436039	0.924846626	0.874546773
354	1	0	1	1	1	0.8	0.2	1	0.8	0.888888889	0.982937173	0.017062827	0.829436039	0.924846626	0.874546773
354	1	0	1	1	1	0.8	0.2	1	0.8	0.888888889	0.982937173	0.017062827	0.829436039	0.924846626	0.874546773
354	1	0	1	1	1	0.8	0.2	1	0.8	0.888888889	0.982937173	0.017062827	0.829436039	0.924846626	0.874546773
354	1	0	1	1	1	0.8	0.2	1	0.8	0.888888889	0.982937173	0.017062827	0.829436039	0.924846626	0.874546773
354	1	0	1	1	1	0.8	0.2	1	0.8	0.888888889	0.982937173	0.017062827	0.829436039	0.924846626	0.874546773
354	1	0	1	1	1	0.8	0.2	1	0.8	0.888888889	0.982937173	0.017062827	0.829436039	0.924846626	0.874546773
354	1	0	1	1	1	0.8	0.2	1	0.8	0.888888889	0.982937173	0.017062827	0.829436039	0.924846626	0.874546773
354	1	0	1	1	1	0.8	0.2	1	0.8	0.888888889	0.982937173	0.017062827	0.829436039	0.924846626	0.874546773
354	1	0	1	1	1	0.8	0.2	1	0.8	0.888888889	0.982937173	0.017062827	0.829436039	0.924846626	0.874546773
354	1	0	1	1	1	0.8	0.2	1	0.8	0.888888889	0.982937173	0.017062827	0.829436039	0.924846626	0.874546773
354	1	0	1	1	1	0.8	0.2	1	0.8	0.888888889	0.982937173	0.017062827	0.829436039	0.924846626	0.874546773
354	1	0	1	1	1	0.8	0.2	1	0.8	0.888888889	0.982937173	0.017062827	0.829436039	0.924846626	0.874546773
354	1	0	1	1	1	0.8	0.2	1	0.8	0.888888889	0.982937173	0.017062827	0.829436039	0.924846626	0.874546773
354	1	0	1	1	1	0.8	0.2	1	0.8	0.888888889	0.982937173	0.017062827	0.829436039	0.924846626	0.874546773
354	1	0	1	1	1	0.8	0.2	1	0.8	0.888888889	0.982937173	0.017062827	0.829436039	0.924846626	0.874546773
354	1	0	1	1	1	0.8	0.2	1	0.8	0.888888889	0.982937173	0.017062827	0.829436039	0.924846626	0.874546773
354	1	0	1	1	1	0.8	0.2	1	0.8	0.888888889	0.982937173	0.017062827	0.829436039	0.924846626	0.874546773
354	1	0	1	1	1	0.8	0.2	1	0.8	0.888888889	0.982937173	0.017062827	0.829436039	0.924846626	0.874546773
354	1	0	1	1	1	0.8	0.2	1	0.8	0.888888889	0.982937173	0.017062827	0.829436039	0.924846626	0.874546773
354	1	0	1	1	1	0.8	0.2	1	0.8	0.888888889	0.982937173	0.017062827	0.829436039	0.924846626	0.874546773
354	1	0	1	1	1	0.8	0.2	1	0.8	0.888888889	0.982937173	0.017062827	0.829436039	0.924846626	0.874546773
354	1	0	1	1	1	0.8	0.2	1	0.8	0.888888889	0.982937173	0.017062827	0.829436039	0.924846626	0.874546773
354	1	0	1	1	1	0.8	0.2	1	0.8	0.888888889	0.982937173	0.017062827	0.829436039	0.924846626	0.874546773
354	1	0	1	1	1	0.8	0.2	1	0.8	0.888888889	0.982937173	0.017062827	0.829436039	0.924846626	0.874546773
354	1	0	1	1	1	0.8	0.2	1	0.8	0.888888889	0.982937173	0.017062827	0.829436039	0.924846626	0.874546773
354	1	0	1	1	1	0.8	0.2	1	0.8	0.888888889	0.982937173	0.017062827	0.829436039	0.924846626	0.874546773
354	1	0	1	1	1	0.8	0.2	1	0.8	0.888888889	0.982937173	0.017062827	0.829436039	0.924846626	0.874546773
354	1	0	1	1	1	0.8	0.2	1	0.8	0.888888889	0.982937173	0.017062827	0.829436039	0.924846626	0.874546773
354	1	0	1	1	1	0.8	0.2	1	0.8	0.888888889	0.982937173	0.017062827	0.829436039	0.924846626	0.874546773
354	1	0	1	1	1	0.8	0.2	1	0.8	0.888888889	0.982937173	0.017062827	0.829436039	0.924846626	0.874546773
354	1	0	1	1	1	0.8	0.2	1	0.8	0.888888889	0.982937173	0.017062827	0.829436039	0.924846626	0.874546773
354	1	0	1	1	1	0.8	0.2	1	0.8	0.888888889	0.982937173	0.017062827	0.829436039	0.924846626	0.874546773
354	1	0	1	1	1	0.8	0.2	1	0.8	0.888888889	0.982937173	0.017062827	0.829436039	0.924846626	0.874546773
354	1	0	1	1	1	0.8	0.2	1	0.8	0.888888889	0.982937173	0.017062827	0.829436039	0.924846626	0.874546773
354	1	0	1	1	1	0.8	0.2	1	0.8	0.888888889	0.982937173	0.017062827	0.829436039	0.924846626	0.874546773
354	1	0	1	1	1	0.8	0.2	1	0.8	0.888888889	0.982937173	0.017062827	0.829436039	0.924846626	0.874546773
354	1	0	1	1	1	0.8	0.2	1	0.8	0.888888889	0.982937173	0.017062827	0.829436039	0.924846626	0.874546773
354	1	0	1	1	1	0.8	0.2	1	0.8	0.888888889	0.982937173	0.017062827	0.829436039	0.924846626	0.874546773
354	1	0	1	1	1	0.8	0.2	1	0.8	0.888888889	0.982937173	0.017062827	0.829436039	0.924846626	0.874546773
354	1	0	1	1	1	0.8	0.2	1	0.8	0.888888889	0.982937173	0.017062827	0.829436039	0.924846626	0.874546773
354	1	0	1	1	1	0.8	0.2	1	0.8	0.888888889	0.982937173	0.017062827	0.829436039	0.924846626	0.874546773
354	1	0	1	1	1	0.8	0.2	1	0.8	0.888888889	0.982937173	0.017062827	0.829436039	0.924846626	0.874546773
354	1	0	1	1	1	0.8	0.2	1	0.8	0.888888889	0.982937173	0.017062827	0.829436039	0.924846626	0.874546773
354	1	0	1	1	1	0.8	0.2	1	0.8	0.888888889	0.982937173	0.017062827	0.829436039	0.924846626	0.874546773
354	1	0	1	1	1	0.8	0.2	1	0.8	0.888888889	0.982937173	0.017062827	0.829436039	0.924846626	0.874546773
354	1	0	1	1	1	0.8	0.2	1	0.8	0.888888889	0.982937173	0.017062827	0.829436039	0.924846626	0.874546773
354	1	0	1	1	1	0.8	0.2	1	0.8	0.888888889	0.982937173	0.017062827	0.829436039	0.924846626	0.874546773
354	1	0	1	1	1	0.8	0.2	1	0.8	0.888888889	0.982937173	0.017062827	0.829436039	0.924846626	0.874546773
354	1	0	1	1	1	0.8	0.2	1	0.8	0.888888889	0.982937173	0.017062827	0.829436039	0.924846626	0.874546773
354	1	0	1	1	1	0.8	0.2	1	0.8	0.888888889	0.982937173	0.017062827	0.829436039	0.924846626	0.874546773
354	1	0	1	1	1	0.8	0.2	1	0.8	0.888888889	0.982937173	0.017062827	0.829436039	0.924846626	0.874546773
354	1	0	1	1	1	0.8	0.2	1	0.8	0.888888889	0.982937173	0.017062827	0.829436039	0.924846626	0.874546773
354	1	0	1	1	1	0.8	0.2	1	0.8	0.888888889	0.982937173	0.017062827	0.829436039	0.924846626	0.874546773
354	1	0	1	1	1	0.8	0.2	1	0.8	0.888888889	0.982937173	0.017062827	0.829436039	0.924846626	0.874546773
354	1	0	1	1	1	0.8	0.2	1	0.8	0.888888889	0.982937173	0.017062827	0.829436039	0.924846626	0.874546773
354	1	0	1	1	1	0.8	0.2	1	0.8	0.888888889	0.982937173	0.017062827	0.829436039	0.924846626	0.874546773
354	1	0	1	1	1	0.8	0.2	1	0.8	0.888888889	0.982937173	0.017062827	0.829436039	0.924846626	0.874546773
354	1	0	1	1	1	0.8	0.2	1	0.8	0.888888889	0.982937173	0.017062827	0.829436039	0.924846626	0.874546773
354	1	0	1	1	1	0.8	0.2	1	0.8	0.888888889	0.982937173	0.017062827	0.829436039	0.924846626	0.874546773
354	1	0	1	1	1	0.8	0.2	1	0.8	0.888888889	0.982937173	0.017062827	0.829436039	0.924846626	0.874546773
354	1	0	1	1	1	0.8	0.2	1	0.8	0.888888889	0.982937173	0.017062827	0.829436039	0.924846626	0.874546773
354	1	0	1	1	1	0.8	0.2	1	0.8	0.888888889	0.982937173	0.017062827	0.829436039	0.924846626	0.874546773
354	1	0	1	1	1	0.8	0.2	1	0.8	0.888888889	0.982937173	0.017062827	0.829436039	0.924846626	0.874546773
354	1	0	1	1	1	0.8	0.2	1	0.8	0.888888889	0.982937173	0.017062827	0.829436039	0.924846626	0.874546773
354	1	0	1	1	1	0.8	0.2	1	0.8	0.888888889	0.982937173	0.017062827	0.829436039	0.924846626	0.874546773
354	1	0	1	1	1	0.8	0.2	1	0.8	0.888888889	0.982937173	0.017062827	0.829436039	0.924846626	0.874546773
354	1	0	1	1	1	0.8	0.2	1	0.8	0.888888889	0.982937173	0.017062827	0.829436039	0.924846626	0.874546773
353	1	0	1	1	1	0.780979827	0.219020173	1	0.780979827	0.877022654	0.98503937	0.01496063	0.85733882	0.928677563	0.891583452
352	1	0	1	1	1	0.781791908	0.218208092	1	0.781791908	0.877534469	0.985435938	0.014564062	0.862448418	0.928888889	0.894436519
351	1	0	1	1	1	0.781524927	0.218475073	1	0.781524927	0.877366255	0.985745183	0.014254817	0.867847411	0.929927007	0.897815363
351	1	0	1	1	1	0.781524927	0.218475073	1	0.781524927	0.877366255	0.985745183	0.014254817	0.867847411	0.929927007	0.897815363
351	1	0	1	1	1	0.781524927	0.218475073	1	0.781524927	0.877366255	0.985745183	0.014254817	0.867847411	0.929927007	0.897815363
350	1	0	1	1	1	0.782032401	0.217967599	1	0.782032401	0.87768595	0.985749386	0.014250614	0.870395634	0.927325581	0.897959184
349	1	0	1	1	1	0.787518574	0.212481426	1	0.787518574	0.881130507	0.986248895	0.013751105	0.877384196	0.92795389	0.901960784
348	1	0	1	1	1	0.789865872	0.210134128	1	0.789865872	0.882597835	0.986349799	0.013650201	0.878911565	0.92816092	0.902865129
348	1	0	1	1	1	0.789865872	0.210134128	1	0.789865872	0.882597835	0.986349799	0.013650201	0.878911565	0.92816092	0.902865129
347	1	0	1	1	1	0.789865872	0.210134128	1	0.789865872	0.882597835	0.986448002	0.013551998	0.880108992	0.92816092	0.903496503
347	1	0	1	1	1	0.789865872	0.210134128	1	0.789865872	0.882597835	0.986448002	0.013551998	0.880108992	0.92816092	0.903496503
347	1	0	1	1	1	0.789865872	0.210134128	1	0.789865872	0.882597835	0.986448002	0.013551998	0.880108992	0.92816092	0.903496503
347	1	0	1	1	1	0.789865872	0.210134128	1	0.789865872	0.882597835	0.986448002	0.013551998	0.880108992	0.92816092	0.903496503
347	1	0	1	1	1	0.789865872	0.210134128	1	0.789865872	0.882597835	0.986448002	0.013551998	0.880108992	0.92816092	0.903496503
347	1	0	1	1	1	0.789865872	0.210134128	1	0.789865872	0.882597835	0.986448002	0.013551998	0.880108992	0.92816092	0.903496503
347	1	0	1	1	1	0.789865872	0.210134128	1	0.789865872	0.882597835	0.986448002	0.013551998	0.880108992	0.92816092	0.903496503
346	1	0	1	1	1	0.789237668	0.210762332	1	0.789237668	0.882205514	0.98664703	0.01335297	0.882833787	0.928366762	0.905027933
346	1	0	1	1	1	0.789237668	0.210762332	1	0.789237668	0.882205514	0.98664703	0.01335297	0.882833787	0.928366762	0.905027933
345	1	0	1	1	1	0.789237668	0.210762332	1	0.789237668	0.882205514	0.98664703	0.01335297	0.882833787	0.928366762	0.905027933
345	1	0	1	1	1	0.789237668	0.210762332	1	0.789237668	0.882205514	0.98664703	0.01335297	0.882833787	0.928366762	0.905027933
345	1	0	1	1	1	0.789237668	0.210762332	1	0.789237668	0.882205514	0.98664703	0.01335297	0.882833787	0.928366762	0.905027933
345	1	0	1	1	1	0.789237668	0.210762332	1	0.789237668	0.882205514	0.98664703	0.01335297	0.882833787	0.928366762	0.905027933
345	1	0	1	1	1	0.789237668	0.210762332	1	0.789237668	0.882205514	0.98664703	0.01335297	0.882833787	0.928366762	0.905027933
345	1	0	1	1	1	0.789237668	0.210762332	1	0.789237668	0.882205514	0.98664703	0.01335297	0.882833787	0.928366762	0.905027933
345	1	0	1	1	1	0.789237668	0.210762332	1	0.789237668	0.882205514	0.98664703	0.01335297	0.882833787	0.928366762	0.905027933
345	1	0	1	1	1	0.789237668	0.210762332	1	0.789237668	0.882205514	0.98664703	0.01335297	0.882833787	0.928366762	0.905027933
345	1	0	1	1	1	0.789237668	0.210762332	1	0.789237668	0.882205514	0.98664703	0.01335297	0.882833787	0.928366762	0.905027933
345	1	0	1	1	1	0.789237668	0.210762332	1	0.789237668	0.882205514	0.98664703	0.01335297	0.882833787	0.928366762	0.905027933
345	1	0	1	1	1	0.789237668	0.210762332	1	0.789237668	0.882205514	0.98664703	0.01335297	0.882833787	0.928366762	0.905027933
345	1	0	1	1	1	0.789237668	0.210762332	1	0.789237668	0.882205514	0.98664703	0.01335297	0.882833787	0.928366762	0.905027933
344	1	0	1	1	1	0.789237668	0.210762332	1	0.789237668	0.882205514	0.98664703	0.01335297	0.882833787	0.928366762	0.905027933
344	1	0	1	1	1	0.789237668	0.210762332	1	0.789237668	0.882205514	0.98664703	0.01335297	0.882833787	0.928366762	0.905027933
344	1	0	1	1	1	0.789237668	0.210762332	1	0.789237668	0.882205514	0.98664703	0.01335297	0.882833787	0.928366762	0.905027933
344	1	0	1	1	1	0.789237668	0.210762332	1	0.789237668	0.882205514	0.98664703	0.01335297	0.882833787	0.928366762	0.905027933
344	1	0	1	1	1	0.789237668	0.210762332	1	0.789237668	0.882205514	0.98664703	0.01335297	0.882833787	0.928366762	0.905027933
344	1	0	1	1	1	0.789237668	0.210762332	1	0.789237668	0.882205514	0.98664703	0.01335297	0.882833787	0.928366762	0.905027933
344	1	0	1	1	1	0.789237668	0.210762332	1	0.789237668	0.882205514	0.98664703	0.01335297	0.882833787	0.928366762	0.905027933
344	1	0	1	1	1	0.789237668	0.210762332	1	0.789237668	0.882205514	0.98664703	0.01335297	0.882833787	0.928366762	0.905027933
344	1	0	1	1	1	0.789237668	0.210762332	1	0.789237668	0.882205514	0.98664703	0.01335297	0.882833787	0.928366762	0.905027933
344	1	0	1	1	1	0.789237668	0.210762332	1	0.789237668	0.882205514	0.98664703	0.01335297	0.882833787	0.928366762	0.905027933
344	1	0	1	1	1	0.789237668	0.210762332	1	0.789237668	0.882205514	0.98664703	0.01335297	0.882833787	0.928366762	0.905027933
344	1	0	1	1	1	0.789237668	0.210762332	1	0.789237668	0.882205514	0.98664703	0.01335297	0.882833787	0.928366762	0.905027933
343	1	0	1	1	1	0.790419162	0.209580838	1	0.790419162	0.882943144	0.987041037	0.012958963	0.887824897	0.928469242	0.907692308
343	1	0	1	1	1	0.790419162	0.209580838	1	0.790419162	0.882943144	0.987041037	0.012958963	0.887824897	0.928469242	0.907692308
343	1	0	1	1	1	0.790419162	0.209580838	1	0.790419162	0.882943144	0.987041037	0.012958963	0.887824897	0.928469242	0.907692308
343	1	0	1	1	1	0.790419162	0.209580838	1	0.790419162	0.882943144	0.987041037	0.012958963	0.887824897	0.928469242	0.907692308
343	1	0	1	1	1	0.790419162	0.209580838	1	0.790419162	0.882943144	0.987041037	0.012958963	0.887824897	0.928469242	0.907692308
343	1	0	1	1	1	0.790419162	0.209580838	1	0.790419162	0.882943144	0.987041037	0.012958963	0.887824897	0.928469242	0.907692308
343	1	0	1	1	1	0.790419162	0.209580838	1	0.790419162	0.882943144	0.987041037	0.012958963	0.887824897	0.928469242	0.907692308
343	1	0	1	1	1	0.790419162	0.209580838	1	0.790419162	0.882943144	0.987041037	0.012958963	0.887824897	0.928469242	0.907692308
343	1	0	1	1	1	0.790419162	0.209580838	1	0.790419162	0.882943144	0.987041037	0.012958963	0.887824897	0.928469242	0.907692308
343	1	0	1	1	1	0.790419162	0.209580838	1	0.790419162	0.882943144	0.987041037	0.012958963	0.887824897	0.928469242	0.907692308
343	1	0	1	1	1	0.790419162	0.209580838	1	0.790419162	0.882943144	0.987041037	0.012958963	0.887824897	0.928469242	0.907692308
343	1	0	1	1	1	0.790419162	0.209580838	1	0.790419162	0.882943144	0.987041037	0.012958963	0.887824897	0.928469242	0.907692308
343	1	0	1	1	1	0.790419162	0.209580838	1	0.790419162	0.882943144	0.987041037	0.012958963	0.887824897	0.928469242	0.907692308
343	1	0	1	1	1	0.790419162	0.209580838	1	0.790419162	0.882943144	0.987041037	0.012958963	0.887824897	0.928469242	0.907692308
343	1	0	1	1	1	0.790419162	0.209580838	1	0.790419162	0.882943144	0.987041037	0.012958963	0.887824897	0.928469242	0.907692308
343	1	0	1	1	1	0.790419162	0.209580838	1	0.790419162	0.882943144	0.987041037	0.012958963	0.887824897	0.928469242	0.907692308
343	1	0	1	1	1	0.790419162	0.209580838	1	0.790419162	0.882943144	0.987041037	0.012958963	0.887824897	0.928469242	0.907692308
343	1	0	1	1	1	0.790419162	0.209580838	1	0.790419162	0.882943144	0.987041037	0.012958963	0.887824897	0.928469242	0.907692308
343	1	0	1	1	1	0.790419162	0.209580838	1	0.790419162	0.882943144	0.987041037	0.012958963	0.887824897	0.928469242	0.907692308
343	1	0	1	1	1	0.790419162	0.209580838	1	0.790419162	0.882943144	0.987041037	0.012958963	0.887824897	0.928469242	0.907692308
343	1	0	1	1	1	0.790419162	0.209580838	1	0.790419162	0.882943144	0.987041037	0.012958963	0.887824897	0.928469242	0.907692308
343	1	0	1	1	1	0.790419162	0.209580838	1	0.790419162	0.882943144	0.987041037	0.012958963	0.887824897	0.928469242	0.907692308
343	1	0	1	1	1	0.790419162	0.209580838	1	0.790419162	0.882943144	0.987041037	0.012958963	0.887824897	0.928469242	0.907692308
343	1	0	1	1	1	0.790419162	0.209580838	1	0.790419162	0.882943144	0.987041037	0.012958963	0.887824897	0.928469242	0.907692308
343	1	0	1	1	1	0.790419162	0.209580838	1	0.790419162	0.882943144	0.987041037	0.012958963	0.887824897	0.928469242	0.907692308
343	1	0	1	1	1	0.790419162	0.209580838	1	0.790419162	0.882943144	0.987041037	0.012958963	0.887824897	0.928469242	0.907692308
343	1	0	1	1	1	0.790419162	0.209580838	1	0.790419162	0.882943144	0.987041037	0.012958963	0.887824897	0.928469242	0.907692308
343	1	0	1	1	1	0.790419162	0.209580838	1	0.790419162	0.882943144	0.987041037	0.012958963	0.887824897	0.928469242	0.907692308
343	1	0	1	1	1	0.790419162	0.209580838	1	0.790419162	0.882943144	0.987041037	0.012958963	0.887824897	0.928469242	0.907692308
343	1	0	1	1	1	0.790419162	0.209580838	1	0.790419162	0.882943144	0.987041037	0.012958963	0.887824897	0.928469242	0.907692308
343	1	0	1	1	1	0.790419162	0.209580838	1	0.790419162	0.882943144	0.987041037	0.012958963	0.887824897	0.928469242	0.907692308
343	1	0	1	1	1	0.790419162	0.209580838	1	0.790419162	0.882943144	0.987041037	0.012958963	0.887824897	0.928469242	0.907692308
343	1	0	1	1	1	0.790419162	0.209580838	1	0.790419162	0.882943144	0.987041037	0.012958963	0.887824897	0.928469242	0.907692308
343	1	0	1	1	1	0.790419162	0.209580838	1	0.790419162	0.882943144	0.987041037	0.012958963	0.887824897	0.928469242	0.907692308
343	1	0	1	1	1	0.790419162	0.209580838	1	0.790419162	0.882943144	0.987041037	0.012958963	0.887824897	0.928469242	0.907692308
343	1	0	1	1	1	0.790419162	0.209580838	1	0.790419162	0.882943144	0.987041037	0.012958963	0.887824897	0.928469242	0.907692308
343	1	0	1	1	1	0.790419162	0.209580838	1	0.790419162	0.882943144	0.987041037	0.012958963	0.887824897	0.928469242	0.907692308
343	1	0	1	1	1	0.790419162	0.209580838	1	0.790419162	0.882943144	0.987041037	0.012958963	0.887824897	0.928469242	0.907692308
343	1	0	1	1	1	0.790419162	0.209580838	1	0.790419162	0.882943144	0.987041037	0.012958963	0.887824897	0.928469242	0.907692308
343	1	0	1	1	1	0.790419162	0.209580838	1	0.790419162	0.882943144	0.987041037	0.012958963	0.887824897	0.928469242	0.907692308
343	1	0	1	1	1	0.790419162	0.209580838	1	0.790419162	0.882943144	0.987041037	0.012958963	0.887824897	0.928469242	0.907692308
343	1	0	1	1	1	0.790419162	0.209580838	1	0.790419162	0.882943144	0.987041037	0.012958963	0.887824897	0.928469242	0.907692308
343	1	0	1	1	1	0.790419162	0.209580838	1	0.790419162	0.882943144	0.987041037	0.012958963	0.887824897	0.928469242	0.907692308
343	1	0	1	1	1	0.790419162	0.209580838	1	0.790419162	0.882943144	0.987041037	0.012958963	0.887824897	0.928469242	0.907692308
343	1	0	1	1	1	0.790419162	0.209580838	1	0.790419162	0.882943144	0.987041037	0.012958963	0.887824897	0.928469242	0.907692308
343	1	0	1	1	1	0.790419162	0.209580838	1	0.790419162	0.882943144	0.987041037	0.012958963	0.887824897	0.928469242	0.907692308
343	1	0	1	1	1	0.790419162	0.209580838	1	0.790419162	0.882943144	0.987041037	0.012958963	0.887824897	0.928469242	0.907692308
343	1	0	1	1	1	0.790419162	0.209580838	1	0.790419162	0.882943144	0.987041037	0.012958963	0.887824897	0.928469242	0.907692308
343	1	0	1	1	1	0.790419162	0.209580838	1	0.790419162	0.882943144	0.987041037	0.012958963	0.887824897	0.928469242	0.907692308
343	1	0	1	1	1	0.790419162	0.209580838	1	0.790419162	0.882943144	0.987041037	0.012958963	0.887824897	0.928469242	0.907692308
343	1	0	1	1	1	0.790419162	0.209580838	1	0.790419162	0.882943144	0.987041037	0.012958963	0.887824897	0.928469242	0.907692308
343	1	0	1	1	1	0.790419162	0.209580838	1	0.790419162	0.882943144	0.987041037	0.012958963	0.887824897	0.928469242	0.907692308
343	1	0	1	1	1	0.790419162	0.209580838	1	0.790419162	0.882943144	0.987041037	0.012958963	0.887824897	0.928469242	0.907692308
343	1	0	1	1	1	0.790419162	0.209580838	1	0.790419162	0.882943144	0.987041037	0.012958963	0.887824897	0.928469242	0.907692308
343	1	0	1	1	1	0.790419162	0.209580838	1	0.790419162	0.882943144	0.987041037	0.012958963	0.887824897	0.928469242	0.907692308
343	1	0	1	1	1	0.790419162	0.209580838	1	0.790419162	0.882943144	0.987041037	0.012958963	0.887824897	0.928469242	0.907692308
343	1	0	1	1	1	0.790419162	0.209580838	1	0.790419162	0.882943144	0.987041037	0.012958963	0.887824897	0.928469242	0.907692308
343	1	0	1	1	1	0.790419162	0.209580838	1	0.790419162	0.882943144	0.987041037	0.012958963	0.887824897	0.928469242	0.907692308
343	1	0	1	1	1	0.790419162	0.209580838	1	0.790419162	0.882943144	0.987041037	0.012958963	0.887824897	0.928469242	0.907692308
343	1	0	1	1	1	0.790419162	0.209580838	1	0.790419162	0.882943144	0.987041037	0.012958963	0.887824897	0.928469242	0.907692308
343	1	0	1	1	1	0.790419162	0.209580838	1	0.790419162	0.882943144	0.987041037	0.012958963	0.887824897	0.928469242	0.907692308
343	1	0	1	1	1	0.790419162	0.209580838	1	0.790419162	0.882943144	0.987041037	0.012958963	0.887824897	0.928469242	0.907692308
343	1	0	1	1	1	0.790419162	0.209580838	1	0.790419162	0.882943144	0.987041037	0.012958963	0.887824897	0.928469242	0.907692308
343	1	0	1	1	1	0.790419162	0.209580838	1	0.790419162	0.882943144	0.987041037	0.012958963	0.887824897	0.928469242	0.907692308
343	1	0	1	1	1	0.790419162	0.209580838	1	0.790419162	0.882943144	0.987041037	0.012958963	0.887824897	0.928469242	0.907692308
343	1	0	1	1	1	0.790419162	0.209580838	1	0.790419162	0.882943144	0.987041037	0.012958963	0.887824897	0.928469242	0.907692308
343	1	0	1	1	1	0.790419162	0.209580838	1	0.790419162	0.882943144	0.987041037	0.012958963	0.887824897	0.928469242	0.907692308
343	1	0	1	1	1	0.790419162	0.209580838	1	0.790419162	0.882943144	0.987041037	0.012958963	0.887824897	0.928469242	0.907692308
343	1	0	1	1	1	0.790419162	0.209580838	1	0.790419162	0.882943144	0.987041037	0.012958963	0.887824897	0.928469242	0.907692308
343	1	0	1	1	1	0.790419162	0.209580838	1	0.790419162	0.882943144	0.987041037	0.012958963	0.887824897	0.928469242	0.907692308
343	1	0	1	1	1	0.790419162	0.209580838	1	0.790419162	0.882943144	0.987041037	0.012958963	0.887824897	0.928469242	0.907692308
343	1	0	1	1	1	0.790419162	0.209580838	1	0.790419162	0.882943144	0.987041037	0.012958963	0.887824897	0.928469242	0.907692308
343	1	0	1	1	1	0.790419162	0.209580838	1	0.790419162	0.882943144	0.987041037	0.012958963	0.887824897	0.928469242	0.907692308
343	1	0	1	1	1	0.790419162	0.209580838	1	0.790419162	0.882943144	0.987041037	0.012958963	0.887824897	0.928469242	0.907692308
343	1	0	1	1	1	0.790419162	0.209580838	1	0.790419162	0.882943144	0.987041037	0.012958963	0.887824897	0.928469242	0.907692308
343	1	0	1	1	1	0.790419162	0.209580838	1	0.790419162	0.882943144	0.987041037	0.012958963	0.887824897	0.928469242	0.907692308
343	1	0	1	1	1	0.790419162	0.209580838	1	0.790419162	0.882943144	0.987041037	0.012958963	0.887824897	0.928469242	0.907692308
343	1	0	1	1	1	0.790419162	0.209580838	1	0.790419162	0.882943144	0.987041037	0.012958963	0.887824897	0.928469242	0.907692308
343	1	0	1	1	1	0.790419162	0.209580838	1	0.790419162	0.882943144	0.987041037	0.012958963	0.887824897	0.928469242	0.907692308
343	1	0	1	1	1	0.790419162	0.209580838	1	0.790419162	0.882943144	0.987041037	0.012958963	0.887824897	0.928469242	0.907692308
343	1	0	1	1	1	0.790419162	0.209580838	1	0.790419162	0.882943144	0.987041037	0.012958963	0.887824897	0.928469242	0.907692308
343	1	0	1	1	1	0.790419162	0.209580838	1	0.790419162	0.882943144	0.987041037	0.012958963	0.887824897	0.928469242	0.907692308
