# Supplementary material for: An Improved Hybrid Feature Selection Algorithm for Electric Charge Recovery Risk
Source: Hindawi journal article supplement (doi:10.1155/2020/8479341), 2020-08-28
Supplement: f1 [file 8479341.f1.zip › 8479341.f1/Experimental Results/201807/BWOA_results.csv]

features_num	Accuracy_high	Loss_high	Precission_high	Recall_high	F1_high	Accuracy_med	Loss_med	Precission_med	Recall_med	F1_med	Accuracy_low	Loss_low	Precission_low	Recall_low	F1_low
367	1.0	0.0	1.0	1.0	1.0	0.7554858934169278	0.24451410658307215	0.9390243902439024	0.7857142857142857	0.8555555555555556	0.9214997626957759	0.07850023730422406	0.6004901960784313	0.684995340167754	0.6399651719634306
367	1.0	0.0	1.0	1.0	1.0	0.7554858934169278	0.24451410658307215	0.9390243902439024	0.7857142857142857	0.8555555555555556	0.9214997626957759	0.07850023730422406	0.6004901960784313	0.684995340167754	0.6399651719634306
367	1.0	0.0	1.0	1.0	1.0	0.7554858934169278	0.24451410658307215	0.9390243902439024	0.7857142857142857	0.8555555555555556	0.9214997626957759	0.07850023730422406	0.6004901960784313	0.684995340167754	0.6399651719634306
367	1.0	0.0	1.0	1.0	1.0	0.7554858934169278	0.24451410658307215	0.9390243902439024	0.7857142857142857	0.8555555555555556	0.9214997626957759	0.07850023730422406	0.6004901960784313	0.684995340167754	0.6399651719634306
367	1.0	0.0	1.0	1.0	1.0	0.7554858934169278	0.24451410658307215	0.9390243902439024	0.7857142857142857	0.8555555555555556	0.9214997626957759	0.07850023730422406	0.6004901960784313	0.684995340167754	0.6399651719634306
367	1.0	0.0	1.0	1.0	1.0	0.7554858934169278	0.24451410658307215	0.9390243902439024	0.7857142857142857	0.8555555555555556	0.9214997626957759	0.07850023730422406	0.6004901960784313	0.684995340167754	0.6399651719634306
367	1.0	0.0	1.0	1.0	1.0	0.7554858934169278	0.24451410658307215	0.9390243902439024	0.7857142857142857	0.8555555555555556	0.9214997626957759	0.07850023730422406	0.6004901960784313	0.684995340167754	0.6399651719634306
367	1.0	0.0	1.0	1.0	1.0	0.7554858934169278	0.24451410658307215	0.9390243902439024	0.7857142857142857	0.8555555555555556	0.9214997626957759	0.07850023730422406	0.6004901960784313	0.684995340167754	0.6399651719634306
367	1.0	0.0	1.0	1.0	1.0	0.7554858934169278	0.24451410658307215	0.9390243902439024	0.7857142857142857	0.8555555555555556	0.9214997626957759	0.07850023730422406	0.6004901960784313	0.684995340167754	0.6399651719634306
367	1.0	0.0	1.0	1.0	1.0	0.7554858934169278	0.24451410658307215	0.9390243902439024	0.7857142857142857	0.8555555555555556	0.9214997626957759	0.07850023730422406	0.6004901960784313	0.684995340167754	0.6399651719634306
367	1.0	0.0	1.0	1.0	1.0	0.7554858934169278	0.24451410658307215	0.9390243902439024	0.7857142857142857	0.8555555555555556	0.9214997626957759	0.07850023730422406	0.6004901960784313	0.684995340167754	0.6399651719634306
293	1.0	0.0	1.0	1.0	1.0	0.8324022346368715	0.16759776536312854	0.9932203389830508	0.8347578347578347	0.9071207430340558	0.9397649846943814	0.06023501530561859	0.519927536231884	0.8776758409785933	0.653014789533561
293	1.0	0.0	1.0	1.0	1.0	0.8324022346368715	0.16759776536312854	0.9932203389830508	0.8347578347578347	0.9071207430340558	0.9397649846943814	0.06023501530561859	0.519927536231884	0.8776758409785933	0.653014789533561
293	1.0	0.0	1.0	1.0	1.0	0.8324022346368715	0.16759776536312854	0.9932203389830508	0.8347578347578347	0.9071207430340558	0.9397649846943814	0.06023501530561859	0.519927536231884	0.8776758409785933	0.653014789533561
293	1.0	0.0	1.0	1.0	1.0	0.8324022346368715	0.16759776536312854	0.9932203389830508	0.8347578347578347	0.9071207430340558	0.9397649846943814	0.06023501530561859	0.519927536231884	0.8776758409785933	0.653014789533561
293	1.0	0.0	1.0	1.0	1.0	0.8324022346368715	0.16759776536312854	0.9932203389830508	0.8347578347578347	0.9071207430340558	0.9397649846943814	0.06023501530561859	0.519927536231884	0.8776758409785933	0.653014789533561
293	1.0	0.0	1.0	1.0	1.0	0.8324022346368715	0.16759776536312854	0.9932203389830508	0.8347578347578347	0.9071207430340558	0.9397649846943814	0.06023501530561859	0.519927536231884	0.8776758409785933	0.653014789533561
293	1.0	0.0	1.0	1.0	1.0	0.8324022346368715	0.16759776536312854	0.9932203389830508	0.8347578347578347	0.9071207430340558	0.9397649846943814	0.06023501530561859	0.519927536231884	0.8776758409785933	0.653014789533561
293	1.0	0.0	1.0	1.0	1.0	0.8324022346368715	0.16759776536312854	0.9932203389830508	0.8347578347578347	0.9071207430340558	0.9397649846943814	0.06023501530561859	0.519927536231884	0.8776758409785933	0.653014789533561
293	1.0	0.0	1.0	1.0	1.0	0.8324022346368715	0.16759776536312854	0.9932203389830508	0.8347578347578347	0.9071207430340558	0.9397649846943814	0.06023501530561859	0.519927536231884	0.8776758409785933	0.653014789533561
293	1.0	0.0	1.0	1.0	1.0	0.8324022346368715	0.16759776536312854	0.9932203389830508	0.8347578347578347	0.9071207430340558	0.9397649846943814	0.06023501530561859	0.519927536231884	0.8776758409785933	0.653014789533561
293	1.0	0.0	1.0	1.0	1.0	0.8324022346368715	0.16759776536312854	0.9932203389830508	0.8347578347578347	0.9071207430340558	0.9397649846943814	0.06023501530561859	0.519927536231884	0.8776758409785933	0.653014789533561
293	1.0	0.0	1.0	1.0	1.0	0.8324022346368715	0.16759776536312854	0.9932203389830508	0.8347578347578347	0.9071207430340558	0.9397649846943814	0.06023501530561859	0.519927536231884	0.8776758409785933	0.653014789533561
293	1.0	0.0	1.0	1.0	1.0	0.8324022346368715	0.16759776536312854	0.9932203389830508	0.8347578347578347	0.9071207430340558	0.9397649846943814	0.06023501530561859	0.519927536231884	0.8776758409785933	0.653014789533561
293	1.0	0.0	1.0	1.0	1.0	0.8324022346368715	0.16759776536312854	0.9932203389830508	0.8347578347578347	0.9071207430340558	0.9397649846943814	0.06023501530561859	0.519927536231884	0.8776758409785933	0.653014789533561
310	1.0	0.0	1.0	1.0	1.0	0.8885832187070152	0.11141678129298482	0.9767441860465116	0.9051724137931034	0.9395973154362416	0.9425491941065954	0.057450805893404566	0.5362595419847328	0.8554033485540334	0.6592375366568914
310	1.0	0.0	1.0	1.0	1.0	0.8885832187070152	0.11141678129298482	0.9767441860465116	0.9051724137931034	0.9395973154362416	0.9425491941065954	0.057450805893404566	0.5362595419847328	0.8554033485540334	0.6592375366568914
310	1.0	0.0	1.0	1.0	1.0	0.8885832187070152	0.11141678129298482	0.9767441860465116	0.9051724137931034	0.9395973154362416	0.9425491941065954	0.057450805893404566	0.5362595419847328	0.8554033485540334	0.6592375366568914
310	1.0	0.0	1.0	1.0	1.0	0.8885832187070152	0.11141678129298482	0.9767441860465116	0.9051724137931034	0.9395973154362416	0.9425491941065954	0.057450805893404566	0.5362595419847328	0.8554033485540334	0.6592375366568914
310	1.0	0.0	1.0	1.0	1.0	0.8885832187070152	0.11141678129298482	0.9767441860465116	0.9051724137931034	0.9395973154362416	0.9425491941065954	0.057450805893404566	0.5362595419847328	0.8554033485540334	0.6592375366568914
310	1.0	0.0	1.0	1.0	1.0	0.8885832187070152	0.11141678129298482	0.9767441860465116	0.9051724137931034	0.9395973154362416	0.9425491941065954	0.057450805893404566	0.5362595419847328	0.8554033485540334	0.6592375366568914
310	1.0	0.0	1.0	1.0	1.0	0.8885832187070152	0.11141678129298482	0.9767441860465116	0.9051724137931034	0.9395973154362416	0.9425491941065954	0.057450805893404566	0.5362595419847328	0.8554033485540334	0.6592375366568914
310	1.0	0.0	1.0	1.0	1.0	0.8885832187070152	0.11141678129298482	0.9767441860465116	0.9051724137931034	0.9395973154362416	0.9425491941065954	0.057450805893404566	0.5362595419847328	0.8554033485540334	0.6592375366568914
310	1.0	0.0	1.0	1.0	1.0	0.8885832187070152	0.11141678129298482	0.9767441860465116	0.9051724137931034	0.9395973154362416	0.9425491941065954	0.057450805893404566	0.5362595419847328	0.8554033485540334	0.6592375366568914
310	1.0	0.0	1.0	1.0	1.0	0.8885832187070152	0.11141678129298482	0.9767441860465116	0.9051724137931034	0.9395973154362416	0.9425491941065954	0.057450805893404566	0.5362595419847328	0.8554033485540334	0.6592375366568914
310	1.0	0.0	1.0	1.0	1.0	0.8885832187070152	0.11141678129298482	0.9767441860465116	0.9051724137931034	0.9395973154362416	0.9425491941065954	0.057450805893404566	0.5362595419847328	0.8554033485540334	0.6592375366568914
310	1.0	0.0	1.0	1.0	1.0	0.8885832187070152	0.11141678129298482	0.9767441860465116	0.9051724137931034	0.9395973154362416	0.9425491941065954	0.057450805893404566	0.5362595419847328	0.8554033485540334	0.6592375366568914
310	1.0	0.0	1.0	1.0	1.0	0.8885832187070152	0.11141678129298482	0.9767441860465116	0.9051724137931034	0.9395973154362416	0.9425491941065954	0.057450805893404566	0.5362595419847328	0.8554033485540334	0.6592375366568914
310	1.0	0.0	1.0	1.0	1.0	0.8885832187070152	0.11141678129298482	0.9767441860465116	0.9051724137931034	0.9395973154362416	0.9425491941065954	0.057450805893404566	0.5362595419847328	0.8554033485540334	0.6592375366568914
310	1.0	0.0	1.0	1.0	1.0	0.8885832187070152	0.11141678129298482	0.9767441860465116	0.9051724137931034	0.9395973154362416	0.9425491941065954	0.057450805893404566	0.5362595419847328	0.8554033485540334	0.6592375366568914
310	1.0	0.0	1.0	1.0	1.0	0.8885832187070152	0.11141678129298482	0.9767441860465116	0.9051724137931034	0.9395973154362416	0.9425491941065954	0.057450805893404566	0.5362595419847328	0.8554033485540334	0.6592375366568914
310	1.0	0.0	1.0	1.0	1.0	0.8885832187070152	0.11141678129298482	0.9767441860465116	0.9051724137931034	0.9395973154362416	0.9425491941065954	0.057450805893404566	0.5362595419847328	0.8554033485540334	0.6592375366568914
310	1.0	0.0	1.0	1.0	1.0	0.8885832187070152	0.11141678129298482	0.9767441860465116	0.9051724137931034	0.9395973154362416	0.9425491941065954	0.057450805893404566	0.5362595419847328	0.8554033485540334	0.6592375366568914
310	1.0	0.0	1.0	1.0	1.0	0.8885832187070152	0.11141678129298482	0.9767441860465116	0.9051724137931034	0.9395973154362416	0.9425491941065954	0.057450805893404566	0.5362595419847328	0.8554033485540334	0.6592375366568914
310	1.0	0.0	1.0	1.0	1.0	0.8885832187070152	0.11141678129298482	0.9767441860465116	0.9051724137931034	0.9395973154362416	0.9425491941065954	0.057450805893404566	0.5362595419847328	0.8554033485540334	0.6592375366568914
310	1.0	0.0	1.0	1.0	1.0	0.8885832187070152	0.11141678129298482	0.9767441860465116	0.9051724137931034	0.9395973154362416	0.9425491941065954	0.057450805893404566	0.5362595419847328	0.8554033485540334	0.6592375366568914
310	1.0	0.0	1.0	1.0	1.0	0.8885832187070152	0.11141678129298482	0.9767441860465116	0.9051724137931034	0.9395973154362416	0.9425491941065954	0.057450805893404566	0.5362595419847328	0.8554033485540334	0.6592375366568914
310	1.0	0.0	1.0	1.0	1.0	0.8885832187070152	0.11141678129298482	0.9767441860465116	0.9051724137931034	0.9395973154362416	0.9425491941065954	0.057450805893404566	0.5362595419847328	0.8554033485540334	0.6592375366568914
310	1.0	0.0	1.0	1.0	1.0	0.8885832187070152	0.11141678129298482	0.9767441860465116	0.9051724137931034	0.9395973154362416	0.9425491941065954	0.057450805893404566	0.5362595419847328	0.8554033485540334	0.6592375366568914
310	1.0	0.0	1.0	1.0	1.0	0.8885832187070152	0.11141678129298482	0.9767441860465116	0.9051724137931034	0.9395973154362416	0.9425491941065954	0.057450805893404566	0.5362595419847328	0.8554033485540334	0.6592375366568914
310	1.0	0.0	1.0	1.0	1.0	0.8885832187070152	0.11141678129298482	0.9767441860465116	0.9051724137931034	0.9395973154362416	0.9425491941065954	0.057450805893404566	0.5362595419847328	0.8554033485540334	0.6592375366568914
310	1.0	0.0	1.0	1.0	1.0	0.8885832187070152	0.11141678129298482	0.9767441860465116	0.9051724137931034	0.9395973154362416	0.9425491941065954	0.057450805893404566	0.5362595419847328	0.8554033485540334	0.6592375366568914
310	1.0	0.0	1.0	1.0	1.0	0.8885832187070152	0.11141678129298482	0.9767441860465116	0.9051724137931034	0.9395973154362416	0.9425491941065954	0.057450805893404566	0.5362595419847328	0.8554033485540334	0.6592375366568914
404	1.0	0.0	1.0	1.0	1.0	0.84992784992785	0.15007215007215002	1.0	0.84992784992785	0.9188767550702028	0.9703594288527819	0.029640571147218076	0.7319848293299621	0.8667664670658682	0.7936943111720357
404	1.0	0.0	1.0	1.0	1.0	0.84992784992785	0.15007215007215002	1.0	0.84992784992785	0.9188767550702028	0.9703594288527819	0.029640571147218076	0.7319848293299621	0.8667664670658682	0.7936943111720357
404	1.0	0.0	1.0	1.0	1.0	0.84992784992785	0.15007215007215002	1.0	0.84992784992785	0.9188767550702028	0.9703594288527819	0.029640571147218076	0.7319848293299621	0.8667664670658682	0.7936943111720357
404	1.0	0.0	1.0	1.0	1.0	0.84992784992785	0.15007215007215002	1.0	0.84992784992785	0.9188767550702028	0.9703594288527819	0.029640571147218076	0.7319848293299621	0.8667664670658682	0.7936943111720357
404	1.0	0.0	1.0	1.0	1.0	0.84992784992785	0.15007215007215002	1.0	0.84992784992785	0.9188767550702028	0.9703594288527819	0.029640571147218076	0.7319848293299621	0.8667664670658682	0.7936943111720357
404	1.0	0.0	1.0	1.0	1.0	0.84992784992785	0.15007215007215002	1.0	0.84992784992785	0.9188767550702028	0.9703594288527819	0.029640571147218076	0.7319848293299621	0.8667664670658682	0.7936943111720357
404	1.0	0.0	1.0	1.0	1.0	0.84992784992785	0.15007215007215002	1.0	0.84992784992785	0.9188767550702028	0.9703594288527819	0.029640571147218076	0.7319848293299621	0.8667664670658682	0.7936943111720357
404	1.0	0.0	1.0	1.0	1.0	0.84992784992785	0.15007215007215002	1.0	0.84992784992785	0.9188767550702028	0.9703594288527819	0.029640571147218076	0.7319848293299621	0.8667664670658682	0.7936943111720357
404	1.0	0.0	1.0	1.0	1.0	0.84992784992785	0.15007215007215002	1.0	0.84992784992785	0.9188767550702028	0.9703594288527819	0.029640571147218076	0.7319848293299621	0.8667664670658682	0.7936943111720357
404	1.0	0.0	1.0	1.0	1.0	0.84992784992785	0.15007215007215002	1.0	0.84992784992785	0.9188767550702028	0.9703594288527819	0.029640571147218076	0.7319848293299621	0.8667664670658682	0.7936943111720357
404	1.0	0.0	1.0	1.0	1.0	0.84992784992785	0.15007215007215002	1.0	0.84992784992785	0.9188767550702028	0.9703594288527819	0.029640571147218076	0.7319848293299621	0.8667664670658682	0.7936943111720357
404	1.0	0.0	1.0	1.0	1.0	0.84992784992785	0.15007215007215002	1.0	0.84992784992785	0.9188767550702028	0.9703594288527819	0.029640571147218076	0.7319848293299621	0.8667664670658682	0.7936943111720357
404	1.0	0.0	1.0	1.0	1.0	0.84992784992785	0.15007215007215002	1.0	0.84992784992785	0.9188767550702028	0.9703594288527819	0.029640571147218076	0.7319848293299621	0.8667664670658682	0.7936943111720357
404	1.0	0.0	1.0	1.0	1.0	0.84992784992785	0.15007215007215002	1.0	0.84992784992785	0.9188767550702028	0.9703594288527819	0.029640571147218076	0.7319848293299621	0.8667664670658682	0.7936943111720357
404	1.0	0.0	1.0	1.0	1.0	0.84992784992785	0.15007215007215002	1.0	0.84992784992785	0.9188767550702028	0.9703594288527819	0.029640571147218076	0.7319848293299621	0.8667664670658682	0.7936943111720357
404	1.0	0.0	1.0	1.0	1.0	0.84992784992785	0.15007215007215002	1.0	0.84992784992785	0.9188767550702028	0.9703594288527819	0.029640571147218076	0.7319848293299621	0.8667664670658682	0.7936943111720357
404	1.0	0.0	1.0	1.0	1.0	0.84992784992785	0.15007215007215002	1.0	0.84992784992785	0.9188767550702028	0.9703594288527819	0.029640571147218076	0.7319848293299621	0.8667664670658682	0.7936943111720357
404	1.0	0.0	1.0	1.0	1.0	0.84992784992785	0.15007215007215002	1.0	0.84992784992785	0.9188767550702028	0.9703594288527819	0.029640571147218076	0.7319848293299621	0.8667664670658682	0.7936943111720357
404	1.0	0.0	1.0	1.0	1.0	0.84992784992785	0.15007215007215002	1.0	0.84992784992785	0.9188767550702028	0.9703594288527819	0.029640571147218076	0.7319848293299621	0.8667664670658682	0.7936943111720357
404	1.0	0.0	1.0	1.0	1.0	0.84992784992785	0.15007215007215002	1.0	0.84992784992785	0.9188767550702028	0.9703594288527819	0.029640571147218076	0.7319848293299621	0.8667664670658682	0.7936943111720357
404	1.0	0.0	1.0	1.0	1.0	0.84992784992785	0.15007215007215002	1.0	0.84992784992785	0.9188767550702028	0.9703594288527819	0.029640571147218076	0.7319848293299621	0.8667664670658682	0.7936943111720357
404	1.0	0.0	1.0	1.0	1.0	0.84992784992785	0.15007215007215002	1.0	0.84992784992785	0.9188767550702028	0.9703594288527819	0.029640571147218076	0.7319848293299621	0.8667664670658682	0.7936943111720357
404	1.0	0.0	1.0	1.0	1.0	0.84992784992785	0.15007215007215002	1.0	0.84992784992785	0.9188767550702028	0.9703594288527819	0.029640571147218076	0.7319848293299621	0.8667664670658682	0.7936943111720357
404	1.0	0.0	1.0	1.0	1.0	0.84992784992785	0.15007215007215002	1.0	0.84992784992785	0.9188767550702028	0.9703594288527819	0.029640571147218076	0.7319848293299621	0.8667664670658682	0.7936943111720357
404	1.0	0.0	1.0	1.0	1.0	0.84992784992785	0.15007215007215002	1.0	0.84992784992785	0.9188767550702028	0.9703594288527819	0.029640571147218076	0.7319848293299621	0.8667664670658682	0.7936943111720357
404	1.0	0.0	1.0	1.0	1.0	0.84992784992785	0.15007215007215002	1.0	0.84992784992785	0.9188767550702028	0.9703594288527819	0.029640571147218076	0.7319848293299621	0.8667664670658682	0.7936943111720357
404	1.0	0.0	1.0	1.0	1.0	0.84992784992785	0.15007215007215002	1.0	0.84992784992785	0.9188767550702028	0.9703594288527819	0.029640571147218076	0.7319848293299621	0.8667664670658682	0.7936943111720357
404	1.0	0.0	1.0	1.0	1.0	0.84992784992785	0.15007215007215002	1.0	0.84992784992785	0.9188767550702028	0.9703594288527819	0.029640571147218076	0.7319848293299621	0.8667664670658682	0.7936943111720357
404	1.0	0.0	1.0	1.0	1.0	0.84992784992785	0.15007215007215002	1.0	0.84992784992785	0.9188767550702028	0.9703594288527819	0.029640571147218076	0.7319848293299621	0.8667664670658682	0.7936943111720357
404	1.0	0.0	1.0	1.0	1.0	0.84992784992785	0.15007215007215002	1.0	0.84992784992785	0.9188767550702028	0.9703594288527819	0.029640571147218076	0.7319848293299621	0.8667664670658682	0.7936943111720357
404	1.0	0.0	1.0	1.0	1.0	0.84992784992785	0.15007215007215002	1.0	0.84992784992785	0.9188767550702028	0.9703594288527819	0.029640571147218076	0.7319848293299621	0.8667664670658682	0.7936943111720357
404	1.0	0.0	1.0	1.0	1.0	0.84992784992785	0.15007215007215002	1.0	0.84992784992785	0.9188767550702028	0.9703594288527819	0.029640571147218076	0.7319848293299621	0.8667664670658682	0.7936943111720357
404	1.0	0.0	1.0	1.0	1.0	0.84992784992785	0.15007215007215002	1.0	0.84992784992785	0.9188767550702028	0.9703594288527819	0.029640571147218076	0.7319848293299621	0.8667664670658682	0.7936943111720357
404	1.0	0.0	1.0	1.0	1.0	0.84992784992785	0.15007215007215002	1.0	0.84992784992785	0.9188767550702028	0.9703594288527819	0.029640571147218076	0.7319848293299621	0.8667664670658682	0.7936943111720357
404	1.0	0.0	1.0	1.0	1.0	0.84992784992785	0.15007215007215002	1.0	0.84992784992785	0.9188767550702028	0.9703594288527819	0.029640571147218076	0.7319848293299621	0.8667664670658682	0.7936943111720357
404	1.0	0.0	1.0	1.0	1.0	0.84992784992785	0.15007215007215002	1.0	0.84992784992785	0.9188767550702028	0.9703594288527819	0.029640571147218076	0.7319848293299621	0.8667664670658682	0.7936943111720357
404	1.0	0.0	1.0	1.0	1.0	0.84992784992785	0.15007215007215002	1.0	0.84992784992785	0.9188767550702028	0.9703594288527819	0.029640571147218076	0.7319848293299621	0.8667664670658682	0.7936943111720357
404	1.0	0.0	1.0	1.0	1.0	0.84992784992785	0.15007215007215002	1.0	0.84992784992785	0.9188767550702028	0.9703594288527819	0.029640571147218076	0.7319848293299621	0.8667664670658682	0.7936943111720357
404	1.0	0.0	1.0	1.0	1.0	0.84992784992785	0.15007215007215002	1.0	0.84992784992785	0.9188767550702028	0.9703594288527819	0.029640571147218076	0.7319848293299621	0.8667664670658682	0.7936943111720357
404	1.0	0.0	1.0	1.0	1.0	0.84992784992785	0.15007215007215002	1.0	0.84992784992785	0.9188767550702028	0.9703594288527819	0.029640571147218076	0.7319848293299621	0.8667664670658682	0.7936943111720357
404	1.0	0.0	1.0	1.0	1.0	0.84992784992785	0.15007215007215002	1.0	0.84992784992785	0.9188767550702028	0.9703594288527819	0.029640571147218076	0.7319848293299621	0.8667664670658682	0.7936943111720357
404	1.0	0.0	1.0	1.0	1.0	0.84992784992785	0.15007215007215002	1.0	0.84992784992785	0.9188767550702028	0.9703594288527819	0.029640571147218076	0.7319848293299621	0.8667664670658682	0.7936943111720357
404	1.0	0.0	1.0	1.0	1.0	0.84992784992785	0.15007215007215002	1.0	0.84992784992785	0.9188767550702028	0.9703594288527819	0.029640571147218076	0.7319848293299621	0.8667664670658682	0.7936943111720357
404	1.0	0.0	1.0	1.0	1.0	0.84992784992785	0.15007215007215002	1.0	0.84992784992785	0.9188767550702028	0.9703594288527819	0.029640571147218076	0.7319848293299621	0.8667664670658682	0.7936943111720357
404	1.0	0.0	1.0	1.0	1.0	0.84992784992785	0.15007215007215002	1.0	0.84992784992785	0.9188767550702028	0.9703594288527819	0.029640571147218076	0.7319848293299621	0.8667664670658682	0.7936943111720357
404	1.0	0.0	1.0	1.0	1.0	0.84992784992785	0.15007215007215002	1.0	0.84992784992785	0.9188767550702028	0.9703594288527819	0.029640571147218076	0.7319848293299621	0.8667664670658682	0.7936943111720357
404	1.0	0.0	1.0	1.0	1.0	0.84992784992785	0.15007215007215002	1.0	0.84992784992785	0.9188767550702028	0.9703594288527819	0.029640571147218076	0.7319848293299621	0.8667664670658682	0.7936943111720357
