# Supplementary material for: An Improved Hybrid Feature Selection Algorithm for Electric Charge Recovery Risk
Source: Hindawi journal article supplement (doi:10.1155/2020/8479341), 2020-08-28
Supplement: f1 [file 8479341.f1.zip › 8479341.f1/Experimental Results/201807/BWOA_SBS_results.csv]

features_num	Accuracy_high	Loss_high	Precission_high	Recall_high	F1_high	Accuracy_med	Loss_med	Precission_med	Recall_med	F1_med	Accuracy_low	Loss_low	Precission_low	Recall_low	F1_low
404	1	0	1	1	1	0.840336134	0.159663866	1	0.83988764	0.912977099	0.968617389	0.031382611	0.70625	0.87191358	0.78038674
403	1	0	1	1	1	0.838709677	0.161290323	1	0.838255977	0.912012242	0.968916519	0.031083481	0.709273183	0.87211094	0.782308224
402	1	0	1	1	1	0.840112202	0.159887798	1	0.839662447	0.912844037	0.968719163	0.031280837	0.706982544	0.873651772	0.781529979
401	1	0	1	1	1	0.838935574	0.161064426	1	0.838483146	0.912146677	0.968913451	0.031086549	0.707865169	0.875	0.782608696
400	1	0	1	1	1	0.840112202	0.159887798	1	0.839662447	0.912844037	0.968817841	0.031182159	0.707347447	0.875192604	0.782369146
400	1	0	1	1	1	0.840112202	0.159887798	1	0.839662447	0.912844037	0.968817841	0.031182159	0.707347447	0.875192604	0.782369146
400	1	0	1	1	1	0.840112202	0.159887798	1	0.839662447	0.912844037	0.968817841	0.031182159	0.707347447	0.875192604	0.782369146
399	1	0	1	1	1	0.840112202	0.159887798	1	0.839662447	0.912844037	0.968817841	0.031182159	0.707347447	0.875192604	0.782369146
398	1	0	1	1	1	0.840336134	0.159663866	1	0.83988764	0.912977099	0.968913451	0.031086549	0.707865169	0.875	0.782608696
398	1	0	1	1	1	0.840336134	0.159663866	1	0.83988764	0.912977099	0.968913451	0.031086549	0.707865169	0.875	0.782608696
398	1	0	1	1	1	0.840336134	0.159663866	1	0.83988764	0.912977099	0.968913451	0.031086549	0.707865169	0.875	0.782608696
398	1	0	1	1	1	0.840336134	0.159663866	1	0.83988764	0.912977099	0.968913451	0.031086549	0.707865169	0.875	0.782608696
398	1	0	1	1	1	0.840336134	0.159663866	1	0.83988764	0.912977099	0.968913451	0.031086549	0.707865169	0.875	0.782608696
398	1	0	1	1	1	0.840336134	0.159663866	1	0.83988764	0.912977099	0.968913451	0.031086549	0.707865169	0.875	0.782608696
397	1	0	1	1	1	0.840112202	0.159887798	1	0.839662447	0.912844037	0.969015196	0.030984804	0.710163112	0.87211094	0.782849239
397	1	0	1	1	1	0.840112202	0.159887798	1	0.839662447	0.912844037	0.969015196	0.030984804	0.710163112	0.87211094	0.782849239
397	1	0	1	1	1	0.840112202	0.159887798	1	0.839662447	0.912844037	0.969015196	0.030984804	0.710163112	0.87211094	0.782849239
397	1	0	1	1	1	0.840112202	0.159887798	1	0.839662447	0.912844037	0.969015196	0.030984804	0.710163112	0.87211094	0.782849239
397	1	0	1	1	1	0.840112202	0.159887798	1	0.839662447	0.912844037	0.969015196	0.030984804	0.710163112	0.87211094	0.782849239
396	1	0	1	1	1	0.841292135	0.158707865	1	0.84084507	0.913542464	0.969116922	0.030883078	0.711417817	0.872307692	0.783690394
396	1	0	1	1	1	0.841292135	0.158707865	1	0.84084507	0.913542464	0.969116922	0.030883078	0.711417817	0.872307692	0.783690394
396	1	0	1	1	1	0.841292135	0.158707865	1	0.84084507	0.913542464	0.969116922	0.030883078	0.711417817	0.872307692	0.783690394
396	1	0	1	1	1	0.841292135	0.158707865	1	0.84084507	0.913542464	0.969116922	0.030883078	0.711417817	0.872307692	0.783690394
396	1	0	1	1	1	0.841292135	0.158707865	1	0.84084507	0.913542464	0.969116922	0.030883078	0.711417817	0.872307692	0.783690394
396	1	0	1	1	1	0.841292135	0.158707865	1	0.84084507	0.913542464	0.969116922	0.030883078	0.711417817	0.872307692	0.783690394
396	1	0	1	1	1	0.841292135	0.158707865	1	0.84084507	0.913542464	0.969116922	0.030883078	0.711417817	0.872307692	0.783690394
395	1	0	1	1	1	0.847407407	0.152592593	1	0.847407407	0.917401764	0.971591468	0.028408532	0.751584284	0.864431487	0.804067797
395	1	0	1	1	1	0.847407407	0.152592593	1	0.847407407	0.917401764	0.971591468	0.028408532	0.751584284	0.864431487	0.804067797
395	1	0	1	1	1	0.847407407	0.152592593	1	0.847407407	0.917401764	0.971591468	0.028408532	0.751584284	0.864431487	0.804067797
395	1	0	1	1	1	0.847407407	0.152592593	1	0.847407407	0.917401764	0.971591468	0.028408532	0.751584284	0.864431487	0.804067797
395	1	0	1	1	1	0.847407407	0.152592593	1	0.847407407	0.917401764	0.971591468	0.028408532	0.751584284	0.864431487	0.804067797
395	1	0	1	1	1	0.847407407	0.152592593	1	0.847407407	0.917401764	0.971591468	0.028408532	0.751584284	0.864431487	0.804067797
395	1	0	1	1	1	0.847407407	0.152592593	1	0.847407407	0.917401764	0.971591468	0.028408532	0.751584284	0.864431487	0.804067797
395	1	0	1	1	1	0.847407407	0.152592593	1	0.847407407	0.917401764	0.971591468	0.028408532	0.751584284	0.864431487	0.804067797
395	1	0	1	1	1	0.847407407	0.152592593	1	0.847407407	0.917401764	0.971591468	0.028408532	0.751584284	0.864431487	0.804067797
395	1	0	1	1	1	0.847407407	0.152592593	1	0.847407407	0.917401764	0.971591468	0.028408532	0.751584284	0.864431487	0.804067797
395	1	0	1	1	1	0.847407407	0.152592593	1	0.847407407	0.917401764	0.971591468	0.028408532	0.751584284	0.864431487	0.804067797
395	1	0	1	1	1	0.847407407	0.152592593	1	0.847407407	0.917401764	0.971591468	0.028408532	0.751584284	0.864431487	0.804067797
395	1	0	1	1	1	0.847407407	0.152592593	1	0.847407407	0.917401764	0.971591468	0.028408532	0.751584284	0.864431487	0.804067797
395	1	0	1	1	1	0.847407407	0.152592593	1	0.847407407	0.917401764	0.971591468	0.028408532	0.751584284	0.864431487	0.804067797
395	1	0	1	1	1	0.847407407	0.152592593	1	0.847407407	0.917401764	0.971591468	0.028408532	0.751584284	0.864431487	0.804067797
395	1	0	1	1	1	0.847407407	0.152592593	1	0.847407407	0.917401764	0.971591468	0.028408532	0.751584284	0.864431487	0.804067797
395	1	0	1	1	1	0.847407407	0.152592593	1	0.847407407	0.917401764	0.971591468	0.028408532	0.751584284	0.864431487	0.804067797
395	1	0	1	1	1	0.847407407	0.152592593	1	0.847407407	0.917401764	0.971591468	0.028408532	0.751584284	0.864431487	0.804067797
395	1	0	1	1	1	0.847407407	0.152592593	1	0.847407407	0.917401764	0.971591468	0.028408532	0.751584284	0.864431487	0.804067797
395	1	0	1	1	1	0.847407407	0.152592593	1	0.847407407	0.917401764	0.971591468	0.028408532	0.751584284	0.864431487	0.804067797
395	1	0	1	1	1	0.847407407	0.152592593	1	0.847407407	0.917401764	0.971591468	0.028408532	0.751584284	0.864431487	0.804067797
395	1	0	1	1	1	0.847407407	0.152592593	1	0.847407407	0.917401764	0.971591468	0.028408532	0.751584284	0.864431487	0.804067797
395	1	0	1	1	1	0.847407407	0.152592593	1	0.847407407	0.917401764	0.971591468	0.028408532	0.751584284	0.864431487	0.804067797
395	1	0	1	1	1	0.847407407	0.152592593	1	0.847407407	0.917401764	0.971591468	0.028408532	0.751584284	0.864431487	0.804067797
395	1	0	1	1	1	0.847407407	0.152592593	1	0.847407407	0.917401764	0.971591468	0.028408532	0.751584284	0.864431487	0.804067797
395	1	0	1	1	1	0.847407407	0.152592593	1	0.847407407	0.917401764	0.971591468	0.028408532	0.751584284	0.864431487	0.804067797
395	1	0	1	1	1	0.847407407	0.152592593	1	0.847407407	0.917401764	0.971591468	0.028408532	0.751584284	0.864431487	0.804067797
395	1	0	1	1	1	0.847407407	0.152592593	1	0.847407407	0.917401764	0.971591468	0.028408532	0.751584284	0.864431487	0.804067797
395	1	0	1	1	1	0.847407407	0.152592593	1	0.847407407	0.917401764	0.971591468	0.028408532	0.751584284	0.864431487	0.804067797
395	1	0	1	1	1	0.847407407	0.152592593	1	0.847407407	0.917401764	0.971591468	0.028408532	0.751584284	0.864431487	0.804067797
395	1	0	1	1	1	0.847407407	0.152592593	1	0.847407407	0.917401764	0.971591468	0.028408532	0.751584284	0.864431487	0.804067797
395	1	0	1	1	1	0.847407407	0.152592593	1	0.847407407	0.917401764	0.971591468	0.028408532	0.751584284	0.864431487	0.804067797
395	1	0	1	1	1	0.847407407	0.152592593	1	0.847407407	0.917401764	0.971591468	0.028408532	0.751584284	0.864431487	0.804067797
395	1	0	1	1	1	0.847407407	0.152592593	1	0.847407407	0.917401764	0.971591468	0.028408532	0.751584284	0.864431487	0.804067797
395	1	0	1	1	1	0.847407407	0.152592593	1	0.847407407	0.917401764	0.971591468	0.028408532	0.751584284	0.864431487	0.804067797
395	1	0	1	1	1	0.847407407	0.152592593	1	0.847407407	0.917401764	0.971591468	0.028408532	0.751584284	0.864431487	0.804067797
395	1	0	1	1	1	0.847407407	0.152592593	1	0.847407407	0.917401764	0.971591468	0.028408532	0.751584284	0.864431487	0.804067797
395	1	0	1	1	1	0.847407407	0.152592593	1	0.847407407	0.917401764	0.971591468	0.028408532	0.751584284	0.864431487	0.804067797
395	1	0	1	1	1	0.847407407	0.152592593	1	0.847407407	0.917401764	0.971591468	0.028408532	0.751584284	0.864431487	0.804067797
395	1	0	1	1	1	0.847407407	0.152592593	1	0.847407407	0.917401764	0.971591468	0.028408532	0.751584284	0.864431487	0.804067797
395	1	0	1	1	1	0.847407407	0.152592593	1	0.847407407	0.917401764	0.971591468	0.028408532	0.751584284	0.864431487	0.804067797
395	1	0	1	1	1	0.847407407	0.152592593	1	0.847407407	0.917401764	0.971591468	0.028408532	0.751584284	0.864431487	0.804067797
395	1	0	1	1	1	0.847407407	0.152592593	1	0.847407407	0.917401764	0.971591468	0.028408532	0.751584284	0.864431487	0.804067797
395	1	0	1	1	1	0.847407407	0.152592593	1	0.847407407	0.917401764	0.971591468	0.028408532	0.751584284	0.864431487	0.804067797
395	1	0	1	1	1	0.847407407	0.152592593	1	0.847407407	0.917401764	0.971591468	0.028408532	0.751584284	0.864431487	0.804067797
395	1	0	1	1	1	0.847407407	0.152592593	1	0.847407407	0.917401764	0.971591468	0.028408532	0.751584284	0.864431487	0.804067797
395	1	0	1	1	1	0.847407407	0.152592593	1	0.847407407	0.917401764	0.971591468	0.028408532	0.751584284	0.864431487	0.804067797
395	1	0	1	1	1	0.847407407	0.152592593	1	0.847407407	0.917401764	0.971591468	0.028408532	0.751584284	0.864431487	0.804067797
395	1	0	1	1	1	0.847407407	0.152592593	1	0.847407407	0.917401764	0.971591468	0.028408532	0.751584284	0.864431487	0.804067797
395	1	0	1	1	1	0.847407407	0.152592593	1	0.847407407	0.917401764	0.971591468	0.028408532	0.751584284	0.864431487	0.804067797
395	1	0	1	1	1	0.847407407	0.152592593	1	0.847407407	0.917401764	0.971591468	0.028408532	0.751584284	0.864431487	0.804067797
395	1	0	1	1	1	0.847407407	0.152592593	1	0.847407407	0.917401764	0.971591468	0.028408532	0.751584284	0.864431487	0.804067797
395	1	0	1	1	1	0.847407407	0.152592593	1	0.847407407	0.917401764	0.971591468	0.028408532	0.751584284	0.864431487	0.804067797
395	1	0	1	1	1	0.847407407	0.152592593	1	0.847407407	0.917401764	0.971591468	0.028408532	0.751584284	0.864431487	0.804067797
395	1	0	1	1	1	0.847407407	0.152592593	1	0.847407407	0.917401764	0.971591468	0.028408532	0.751584284	0.864431487	0.804067797
395	1	0	1	1	1	0.847407407	0.152592593	1	0.847407407	0.917401764	0.971591468	0.028408532	0.751584284	0.864431487	0.804067797
395	1	0	1	1	1	0.847407407	0.152592593	1	0.847407407	0.917401764	0.971591468	0.028408532	0.751584284	0.864431487	0.804067797
395	1	0	1	1	1	0.847407407	0.152592593	1	0.847407407	0.917401764	0.971591468	0.028408532	0.751584284	0.864431487	0.804067797
395	1	0	1	1	1	0.847407407	0.152592593	1	0.847407407	0.917401764	0.971591468	0.028408532	0.751584284	0.864431487	0.804067797
395	1	0	1	1	1	0.847407407	0.152592593	1	0.847407407	0.917401764	0.971591468	0.028408532	0.751584284	0.864431487	0.804067797
395	1	0	1	1	1	0.847407407	0.152592593	1	0.847407407	0.917401764	0.971591468	0.028408532	0.751584284	0.864431487	0.804067797
395	1	0	1	1	1	0.847407407	0.152592593	1	0.847407407	0.917401764	0.971591468	0.028408532	0.751584284	0.864431487	0.804067797
395	1	0	1	1	1	0.847407407	0.152592593	1	0.847407407	0.917401764	0.971591468	0.028408532	0.751584284	0.864431487	0.804067797
395	1	0	1	1	1	0.847407407	0.152592593	1	0.847407407	0.917401764	0.971591468	0.028408532	0.751584284	0.864431487	0.804067797
395	1	0	1	1	1	0.847407407	0.152592593	1	0.847407407	0.917401764	0.971591468	0.028408532	0.751584284	0.864431487	0.804067797
395	1	0	1	1	1	0.847407407	0.152592593	1	0.847407407	0.917401764	0.971591468	0.028408532	0.751584284	0.864431487	0.804067797
395	1	0	1	1	1	0.847407407	0.152592593	1	0.847407407	0.917401764	0.971591468	0.028408532	0.751584284	0.864431487	0.804067797
395	1	0	1	1	1	0.847407407	0.152592593	1	0.847407407	0.917401764	0.971591468	0.028408532	0.751584284	0.864431487	0.804067797
395	1	0	1	1	1	0.847407407	0.152592593	1	0.847407407	0.917401764	0.971591468	0.028408532	0.751584284	0.864431487	0.804067797
395	1	0	1	1	1	0.847407407	0.152592593	1	0.847407407	0.917401764	0.971591468	0.028408532	0.751584284	0.864431487	0.804067797
395	1	0	1	1	1	0.847407407	0.152592593	1	0.847407407	0.917401764	0.971591468	0.028408532	0.751584284	0.864431487	0.804067797
395	1	0	1	1	1	0.847407407	0.152592593	1	0.847407407	0.917401764	0.971591468	0.028408532	0.751584284	0.864431487	0.804067797
395	1	0	1	1	1	0.847407407	0.152592593	1	0.847407407	0.917401764	0.971591468	0.028408532	0.751584284	0.864431487	0.804067797
395	1	0	1	1	1	0.847407407	0.152592593	1	0.847407407	0.917401764	0.971591468	0.028408532	0.751584284	0.864431487	0.804067797
395	1	0	1	1	1	0.847407407	0.152592593	1	0.847407407	0.917401764	0.971591468	0.028408532	0.751584284	0.864431487	0.804067797
395	1	0	1	1	1	0.847407407	0.152592593	1	0.847407407	0.917401764	0.971591468	0.028408532	0.751584284	0.864431487	0.804067797
395	1	0	1	1	1	0.847407407	0.152592593	1	0.847407407	0.917401764	0.971591468	0.028408532	0.751584284	0.864431487	0.804067797
395	1	0	1	1	1	0.847407407	0.152592593	1	0.847407407	0.917401764	0.971591468	0.028408532	0.751584284	0.864431487	0.804067797
395	1	0	1	1	1	0.847407407	0.152592593	1	0.847407407	0.917401764	0.971591468	0.028408532	0.751584284	0.864431487	0.804067797
395	1	0	1	1	1	0.847407407	0.152592593	1	0.847407407	0.917401764	0.971591468	0.028408532	0.751584284	0.864431487	0.804067797
395	1	0	1	1	1	0.847407407	0.152592593	1	0.847407407	0.917401764	0.971591468	0.028408532	0.751584284	0.864431487	0.804067797
395	1	0	1	1	1	0.847407407	0.152592593	1	0.847407407	0.917401764	0.971591468	0.028408532	0.751584284	0.864431487	0.804067797
395	1	0	1	1	1	0.847407407	0.152592593	1	0.847407407	0.917401764	0.971591468	0.028408532	0.751584284	0.864431487	0.804067797
395	1	0	1	1	1	0.847407407	0.152592593	1	0.847407407	0.917401764	0.971591468	0.028408532	0.751584284	0.864431487	0.804067797
395	1	0	1	1	1	0.847407407	0.152592593	1	0.847407407	0.917401764	0.971591468	0.028408532	0.751584284	0.864431487	0.804067797
395	1	0	1	1	1	0.847407407	0.152592593	1	0.847407407	0.917401764	0.971591468	0.028408532	0.751584284	0.864431487	0.804067797
395	1	0	1	1	1	0.847407407	0.152592593	1	0.847407407	0.917401764	0.971591468	0.028408532	0.751584284	0.864431487	0.804067797
395	1	0	1	1	1	0.847407407	0.152592593	1	0.847407407	0.917401764	0.971591468	0.028408532	0.751584284	0.864431487	0.804067797
395	1	0	1	1	1	0.847407407	0.152592593	1	0.847407407	0.917401764	0.971591468	0.028408532	0.751584284	0.864431487	0.804067797
395	1	0	1	1	1	0.847407407	0.152592593	1	0.847407407	0.917401764	0.971591468	0.028408532	0.751584284	0.864431487	0.804067797
395	1	0	1	1	1	0.847407407	0.152592593	1	0.847407407	0.917401764	0.971591468	0.028408532	0.751584284	0.864431487	0.804067797
395	1	0	1	1	1	0.847407407	0.152592593	1	0.847407407	0.917401764	0.971591468	0.028408532	0.751584284	0.864431487	0.804067797
395	1	0	1	1	1	0.847407407	0.152592593	1	0.847407407	0.917401764	0.971591468	0.028408532	0.751584284	0.864431487	0.804067797
395	1	0	1	1	1	0.847407407	0.152592593	1	0.847407407	0.917401764	0.971591468	0.028408532	0.751584284	0.864431487	0.804067797
395	1	0	1	1	1	0.847407407	0.152592593	1	0.847407407	0.917401764	0.971591468	0.028408532	0.751584284	0.864431487	0.804067797
395	1	0	1	1	1	0.847407407	0.152592593	1	0.847407407	0.917401764	0.971591468	0.028408532	0.751584284	0.864431487	0.804067797
395	1	0	1	1	1	0.847407407	0.152592593	1	0.847407407	0.917401764	0.971591468	0.028408532	0.751584284	0.864431487	0.804067797
395	1	0	1	1	1	0.847407407	0.152592593	1	0.847407407	0.917401764	0.971591468	0.028408532	0.751584284	0.864431487	0.804067797
395	1	0	1	1	1	0.847407407	0.152592593	1	0.847407407	0.917401764	0.971591468	0.028408532	0.751584284	0.864431487	0.804067797
395	1	0	1	1	1	0.847407407	0.152592593	1	0.847407407	0.917401764	0.971591468	0.028408532	0.751584284	0.864431487	0.804067797
394	1	0	1	1	1	0.855882353	0.144117647	1	0.855882353	0.922345483	0.971085759	0.028914241	0.743396226	0.86784141	0.800813008
394	1	0	1	1	1	0.855882353	0.144117647	1	0.855882353	0.922345483	0.971085759	0.028914241	0.743396226	0.86784141	0.800813008
394	1	0	1	1	1	0.855882353	0.144117647	1	0.855882353	0.922345483	0.971085759	0.028914241	0.743396226	0.86784141	0.800813008
394	1	0	1	1	1	0.855882353	0.144117647	1	0.855882353	0.922345483	0.971085759	0.028914241	0.743396226	0.86784141	0.800813008
394	1	0	1	1	1	0.855882353	0.144117647	1	0.855882353	0.922345483	0.971085759	0.028914241	0.743396226	0.86784141	0.800813008
394	1	0	1	1	1	0.855882353	0.144117647	1	0.855882353	0.922345483	0.971085759	0.028914241	0.743396226	0.86784141	0.800813008
394	1	0	1	1	1	0.855882353	0.144117647	1	0.855882353	0.922345483	0.971085759	0.028914241	0.743396226	0.86784141	0.800813008
394	1	0	1	1	1	0.855882353	0.144117647	1	0.855882353	0.922345483	0.971085759	0.028914241	0.743396226	0.86784141	0.800813008
394	1	0	1	1	1	0.855882353	0.144117647	1	0.855882353	0.922345483	0.971085759	0.028914241	0.743396226	0.86784141	0.800813008
394	1	0	1	1	1	0.855882353	0.144117647	1	0.855882353	0.922345483	0.971085759	0.028914241	0.743396226	0.86784141	0.800813008
394	1	0	1	1	1	0.855882353	0.144117647	1	0.855882353	0.922345483	0.971085759	0.028914241	0.743396226	0.86784141	0.800813008
394	1	0	1	1	1	0.855882353	0.144117647	1	0.855882353	0.922345483	0.971085759	0.028914241	0.743396226	0.86784141	0.800813008
394	1	0	1	1	1	0.855882353	0.144117647	1	0.855882353	0.922345483	0.971085759	0.028914241	0.743396226	0.86784141	0.800813008
394	1	0	1	1	1	0.855882353	0.144117647	1	0.855882353	0.922345483	0.971085759	0.028914241	0.743396226	0.86784141	0.800813008
394	1	0	1	1	1	0.855882353	0.144117647	1	0.855882353	0.922345483	0.971085759	0.028914241	0.743396226	0.86784141	0.800813008
394	1	0	1	1	1	0.855882353	0.144117647	1	0.855882353	0.922345483	0.971085759	0.028914241	0.743396226	0.86784141	0.800813008
394	1	0	1	1	1	0.855882353	0.144117647	1	0.855882353	0.922345483	0.971085759	0.028914241	0.743396226	0.86784141	0.800813008
394	1	0	1	1	1	0.855882353	0.144117647	1	0.855882353	0.922345483	0.971085759	0.028914241	0.743396226	0.86784141	0.800813008
394	1	0	1	1	1	0.855882353	0.144117647	1	0.855882353	0.922345483	0.971085759	0.028914241	0.743396226	0.86784141	0.800813008
394	1	0	1	1	1	0.855882353	0.144117647	1	0.855882353	0.922345483	0.971085759	0.028914241	0.743396226	0.86784141	0.800813008
394	1	0	1	1	1	0.855882353	0.144117647	1	0.855882353	0.922345483	0.971085759	0.028914241	0.743396226	0.86784141	0.800813008
394	1	0	1	1	1	0.855882353	0.144117647	1	0.855882353	0.922345483	0.971085759	0.028914241	0.743396226	0.86784141	0.800813008
394	1	0	1	1	1	0.855882353	0.144117647	1	0.855882353	0.922345483	0.971085759	0.028914241	0.743396226	0.86784141	0.800813008
394	1	0	1	1	1	0.855882353	0.144117647	1	0.855882353	0.922345483	0.971085759	0.028914241	0.743396226	0.86784141	0.800813008
394	1	0	1	1	1	0.855882353	0.144117647	1	0.855882353	0.922345483	0.971085759	0.028914241	0.743396226	0.86784141	0.800813008
394	1	0	1	1	1	0.855882353	0.144117647	1	0.855882353	0.922345483	0.971085759	0.028914241	0.743396226	0.86784141	0.800813008
394	1	0	1	1	1	0.855882353	0.144117647	1	0.855882353	0.922345483	0.971085759	0.028914241	0.743396226	0.86784141	0.800813008
394	1	0	1	1	1	0.855882353	0.144117647	1	0.855882353	0.922345483	0.971085759	0.028914241	0.743396226	0.86784141	0.800813008
394	1	0	1	1	1	0.855882353	0.144117647	1	0.855882353	0.922345483	0.971085759	0.028914241	0.743396226	0.86784141	0.800813008
394	1	0	1	1	1	0.855882353	0.144117647	1	0.855882353	0.922345483	0.971085759	0.028914241	0.743396226	0.86784141	0.800813008
394	1	0	1	1	1	0.855882353	0.144117647	1	0.855882353	0.922345483	0.971085759	0.028914241	0.743396226	0.86784141	0.800813008
394	1	0	1	1	1	0.855882353	0.144117647	1	0.855882353	0.922345483	0.971085759	0.028914241	0.743396226	0.86784141	0.800813008
394	1	0	1	1	1	0.855882353	0.144117647	1	0.855882353	0.922345483	0.971085759	0.028914241	0.743396226	0.86784141	0.800813008
394	1	0	1	1	1	0.855882353	0.144117647	1	0.855882353	0.922345483	0.971085759	0.028914241	0.743396226	0.86784141	0.800813008
394	1	0	1	1	1	0.855882353	0.144117647	1	0.855882353	0.922345483	0.971085759	0.028914241	0.743396226	0.86784141	0.800813008
394	1	0	1	1	1	0.855882353	0.144117647	1	0.855882353	0.922345483	0.971085759	0.028914241	0.743396226	0.86784141	0.800813008
394	1	0	1	1	1	0.855882353	0.144117647	1	0.855882353	0.922345483	0.971085759	0.028914241	0.743396226	0.86784141	0.800813008
394	1	0	1	1	1	0.855882353	0.144117647	1	0.855882353	0.922345483	0.971085759	0.028914241	0.743396226	0.86784141	0.800813008
394	1	0	1	1	1	0.855882353	0.144117647	1	0.855882353	0.922345483	0.971085759	0.028914241	0.743396226	0.86784141	0.800813008
394	1	0	1	1	1	0.855882353	0.144117647	1	0.855882353	0.922345483	0.971085759	0.028914241	0.743396226	0.86784141	0.800813008
394	1	0	1	1	1	0.855882353	0.144117647	1	0.855882353	0.922345483	0.971085759	0.028914241	0.743396226	0.86784141	0.800813008
394	1	0	1	1	1	0.855882353	0.144117647	1	0.855882353	0.922345483	0.971085759	0.028914241	0.743396226	0.86784141	0.800813008
394	1	0	1	1	1	0.855882353	0.144117647	1	0.855882353	0.922345483	0.971085759	0.028914241	0.743396226	0.86784141	0.800813008
394	1	0	1	1	1	0.855882353	0.144117647	1	0.855882353	0.922345483	0.971085759	0.028914241	0.743396226	0.86784141	0.800813008
394	1	0	1	1	1	0.855882353	0.144117647	1	0.855882353	0.922345483	0.971085759	0.028914241	0.743396226	0.86784141	0.800813008
394	1	0	1	1	1	0.855882353	0.144117647	1	0.855882353	0.922345483	0.971085759	0.028914241	0.743396226	0.86784141	0.800813008
394	1	0	1	1	1	0.855882353	0.144117647	1	0.855882353	0.922345483	0.971085759	0.028914241	0.743396226	0.86784141	0.800813008
394	1	0	1	1	1	0.855882353	0.144117647	1	0.855882353	0.922345483	0.971085759	0.028914241	0.743396226	0.86784141	0.800813008
394	1	0	1	1	1	0.855882353	0.144117647	1	0.855882353	0.922345483	0.971085759	0.028914241	0.743396226	0.86784141	0.800813008
394	1	0	1	1	1	0.855882353	0.144117647	1	0.855882353	0.922345483	0.971085759	0.028914241	0.743396226	0.86784141	0.800813008
394	1	0	1	1	1	0.855882353	0.144117647	1	0.855882353	0.922345483	0.971085759	0.028914241	0.743396226	0.86784141	0.800813008
394	1	0	1	1	1	0.855882353	0.144117647	1	0.855882353	0.922345483	0.971085759	0.028914241	0.743396226	0.86784141	0.800813008
394	1	0	1	1	1	0.855882353	0.144117647	1	0.855882353	0.922345483	0.971085759	0.028914241	0.743396226	0.86784141	0.800813008
394	1	0	1	1	1	0.855882353	0.144117647	1	0.855882353	0.922345483	0.971085759	0.028914241	0.743396226	0.86784141	0.800813008
394	1	0	1	1	1	0.855882353	0.144117647	1	0.855882353	0.922345483	0.971085759	0.028914241	0.743396226	0.86784141	0.800813008
394	1	0	1	1	1	0.855882353	0.144117647	1	0.855882353	0.922345483	0.971085759	0.028914241	0.743396226	0.86784141	0.800813008
394	1	0	1	1	1	0.855882353	0.144117647	1	0.855882353	0.922345483	0.971085759	0.028914241	0.743396226	0.86784141	0.800813008
394	1	0	1	1	1	0.855882353	0.144117647	1	0.855882353	0.922345483	0.971085759	0.028914241	0.743396226	0.86784141	0.800813008
394	1	0	1	1	1	0.855882353	0.144117647	1	0.855882353	0.922345483	0.971085759	0.028914241	0.743396226	0.86784141	0.800813008
394	1	0	1	1	1	0.855882353	0.144117647	1	0.855882353	0.922345483	0.971085759	0.028914241	0.743396226	0.86784141	0.800813008
394	1	0	1	1	1	0.855882353	0.144117647	1	0.855882353	0.922345483	0.971085759	0.028914241	0.743396226	0.86784141	0.800813008
394	1	0	1	1	1	0.855882353	0.144117647	1	0.855882353	0.922345483	0.971085759	0.028914241	0.743396226	0.86784141	0.800813008
394	1	0	1	1	1	0.855882353	0.144117647	1	0.855882353	0.922345483	0.971085759	0.028914241	0.743396226	0.86784141	0.800813008
394	1	0	1	1	1	0.855882353	0.144117647	1	0.855882353	0.922345483	0.971085759	0.028914241	0.743396226	0.86784141	0.800813008
394	1	0	1	1	1	0.855882353	0.144117647	1	0.855882353	0.922345483	0.971085759	0.028914241	0.743396226	0.86784141	0.800813008
394	1	0	1	1	1	0.855882353	0.144117647	1	0.855882353	0.922345483	0.971085759	0.028914241	0.743396226	0.86784141	0.800813008
394	1	0	1	1	1	0.855882353	0.144117647	1	0.855882353	0.922345483	0.971085759	0.028914241	0.743396226	0.86784141	0.800813008
394	1	0	1	1	1	0.855882353	0.144117647	1	0.855882353	0.922345483	0.971085759	0.028914241	0.743396226	0.86784141	0.800813008
394	1	0	1	1	1	0.855882353	0.144117647	1	0.855882353	0.922345483	0.971085759	0.028914241	0.743396226	0.86784141	0.800813008
394	1	0	1	1	1	0.855882353	0.144117647	1	0.855882353	0.922345483	0.971085759	0.028914241	0.743396226	0.86784141	0.800813008
394	1	0	1	1	1	0.855882353	0.144117647	1	0.855882353	0.922345483	0.971085759	0.028914241	0.743396226	0.86784141	0.800813008
394	1	0	1	1	1	0.855882353	0.144117647	1	0.855882353	0.922345483	0.971085759	0.028914241	0.743396226	0.86784141	0.800813008
394	1	0	1	1	1	0.855882353	0.144117647	1	0.855882353	0.922345483	0.971085759	0.028914241	0.743396226	0.86784141	0.800813008
394	1	0	1	1	1	0.855882353	0.144117647	1	0.855882353	0.922345483	0.971085759	0.028914241	0.743396226	0.86784141	0.800813008
394	1	0	1	1	1	0.855882353	0.144117647	1	0.855882353	0.922345483	0.971085759	0.028914241	0.743396226	0.86784141	0.800813008
394	1	0	1	1	1	0.855882353	0.144117647	1	0.855882353	0.922345483	0.971085759	0.028914241	0.743396226	0.86784141	0.800813008
394	1	0	1	1	1	0.855882353	0.144117647	1	0.855882353	0.922345483	0.971085759	0.028914241	0.743396226	0.86784141	0.800813008
394	1	0	1	1	1	0.855882353	0.144117647	1	0.855882353	0.922345483	0.971085759	0.028914241	0.743396226	0.86784141	0.800813008
394	1	0	1	1	1	0.855882353	0.144117647	1	0.855882353	0.922345483	0.971085759	0.028914241	0.743396226	0.86784141	0.800813008
394	1	0	1	1	1	0.855882353	0.144117647	1	0.855882353	0.922345483	0.971085759	0.028914241	0.743396226	0.86784141	0.800813008
394	1	0	1	1	1	0.855882353	0.144117647	1	0.855882353	0.922345483	0.971085759	0.028914241	0.743396226	0.86784141	0.800813008
394	1	0	1	1	1	0.855882353	0.144117647	1	0.855882353	0.922345483	0.971085759	0.028914241	0.743396226	0.86784141	0.800813008
394	1	0	1	1	1	0.855882353	0.144117647	1	0.855882353	0.922345483	0.971085759	0.028914241	0.743396226	0.86784141	0.800813008
394	1	0	1	1	1	0.855882353	0.144117647	1	0.855882353	0.922345483	0.971085759	0.028914241	0.743396226	0.86784141	0.800813008
394	1	0	1	1	1	0.855882353	0.144117647	1	0.855882353	0.922345483	0.971085759	0.028914241	0.743396226	0.86784141	0.800813008
394	1	0	1	1	1	0.855882353	0.144117647	1	0.855882353	0.922345483	0.971085759	0.028914241	0.743396226	0.86784141	0.800813008
394	1	0	1	1	1	0.855882353	0.144117647	1	0.855882353	0.922345483	0.971085759	0.028914241	0.743396226	0.86784141	0.800813008
394	1	0	1	1	1	0.855882353	0.144117647	1	0.855882353	0.922345483	0.971085759	0.028914241	0.743396226	0.86784141	0.800813008
394	1	0	1	1	1	0.855882353	0.144117647	1	0.855882353	0.922345483	0.971085759	0.028914241	0.743396226	0.86784141	0.800813008
394	1	0	1	1	1	0.855882353	0.144117647	1	0.855882353	0.922345483	0.971085759	0.028914241	0.743396226	0.86784141	0.800813008
394	1	0	1	1	1	0.855882353	0.144117647	1	0.855882353	0.922345483	0.971085759	0.028914241	0.743396226	0.86784141	0.800813008
394	1	0	1	1	1	0.855882353	0.144117647	1	0.855882353	0.922345483	0.971085759	0.028914241	0.743396226	0.86784141	0.800813008
394	1	0	1	1	1	0.855882353	0.144117647	1	0.855882353	0.922345483	0.971085759	0.028914241	0.743396226	0.86784141	0.800813008
394	1	0	1	1	1	0.855882353	0.144117647	1	0.855882353	0.922345483	0.971085759	0.028914241	0.743396226	0.86784141	0.800813008
394	1	0	1	1	1	0.855882353	0.144117647	1	0.855882353	0.922345483	0.971085759	0.028914241	0.743396226	0.86784141	0.800813008
394	1	0	1	1	1	0.855882353	0.144117647	1	0.855882353	0.922345483	0.971085759	0.028914241	0.743396226	0.86784141	0.800813008
394	1	0	1	1	1	0.855882353	0.144117647	1	0.855882353	0.922345483	0.971085759	0.028914241	0.743396226	0.86784141	0.800813008
394	1	0	1	1	1	0.855882353	0.144117647	1	0.855882353	0.922345483	0.971085759	0.028914241	0.743396226	0.86784141	0.800813008
394	1	0	1	1	1	0.855882353	0.144117647	1	0.855882353	0.922345483	0.971085759	0.028914241	0.743396226	0.86784141	0.800813008
394	1	0	1	1	1	0.855882353	0.144117647	1	0.855882353	0.922345483	0.971085759	0.028914241	0.743396226	0.86784141	0.800813008
394	1	0	1	1	1	0.855882353	0.144117647	1	0.855882353	0.922345483	0.971085759	0.028914241	0.743396226	0.86784141	0.800813008
394	1	0	1	1	1	0.855882353	0.144117647	1	0.855882353	0.922345483	0.971085759	0.028914241	0.743396226	0.86784141	0.800813008
394	1	0	1	1	1	0.855882353	0.144117647	1	0.855882353	0.922345483	0.971085759	0.028914241	0.743396226	0.86784141	0.800813008
394	1	0	1	1	1	0.855882353	0.144117647	1	0.855882353	0.922345483	0.971085759	0.028914241	0.743396226	0.86784141	0.800813008
394	1	0	1	1	1	0.855882353	0.144117647	1	0.855882353	0.922345483	0.971085759	0.028914241	0.743396226	0.86784141	0.800813008
394	1	0	1	1	1	0.855882353	0.144117647	1	0.855882353	0.922345483	0.971085759	0.028914241	0.743396226	0.86784141	0.800813008
394	1	0	1	1	1	0.855882353	0.144117647	1	0.855882353	0.922345483	0.971085759	0.028914241	0.743396226	0.86784141	0.800813008
394	1	0	1	1	1	0.855882353	0.144117647	1	0.855882353	0.922345483	0.971085759	0.028914241	0.743396226	0.86784141	0.800813008
394	1	0	1	1	1	0.855882353	0.144117647	1	0.855882353	0.922345483	0.971085759	0.028914241	0.743396226	0.86784141	0.800813008
394	1	0	1	1	1	0.855882353	0.144117647	1	0.855882353	0.922345483	0.971085759	0.028914241	0.743396226	0.86784141	0.800813008
394	1	0	1	1	1	0.855882353	0.144117647	1	0.855882353	0.922345483	0.971085759	0.028914241	0.743396226	0.86784141	0.800813008
394	1	0	1	1	1	0.855882353	0.144117647	1	0.855882353	0.922345483	0.971085759	0.028914241	0.743396226	0.86784141	0.800813008
394	1	0	1	1	1	0.855882353	0.144117647	1	0.855882353	0.922345483	0.971085759	0.028914241	0.743396226	0.86784141	0.800813008
394	1	0	1	1	1	0.855882353	0.144117647	1	0.855882353	0.922345483	0.971085759	0.028914241	0.743396226	0.86784141	0.800813008
394	1	0	1	1	1	0.855882353	0.144117647	1	0.855882353	0.922345483	0.971085759	0.028914241	0.743396226	0.86784141	0.800813008
394	1	0	1	1	1	0.855882353	0.144117647	1	0.855882353	0.922345483	0.971085759	0.028914241	0.743396226	0.86784141	0.800813008
394	1	0	1	1	1	0.855882353	0.144117647	1	0.855882353	0.922345483	0.971085759	0.028914241	0.743396226	0.86784141	0.800813008
394	1	0	1	1	1	0.855882353	0.144117647	1	0.855882353	0.922345483	0.971085759	0.028914241	0.743396226	0.86784141	0.800813008
394	1	0	1	1	1	0.855882353	0.144117647	1	0.855882353	0.922345483	0.971085759	0.028914241	0.743396226	0.86784141	0.800813008
394	1	0	1	1	1	0.855882353	0.144117647	1	0.855882353	0.922345483	0.971085759	0.028914241	0.743396226	0.86784141	0.800813008
394	1	0	1	1	1	0.855882353	0.144117647	1	0.855882353	0.922345483	0.971085759	0.028914241	0.743396226	0.86784141	0.800813008
394	1	0	1	1	1	0.855882353	0.144117647	1	0.855882353	0.922345483	0.971085759	0.028914241	0.743396226	0.86784141	0.800813008
394	1	0	1	1	1	0.855882353	0.144117647	1	0.855882353	0.922345483	0.971085759	0.028914241	0.743396226	0.86784141	0.800813008
394	1	0	1	1	1	0.855882353	0.144117647	1	0.855882353	0.922345483	0.971085759	0.028914241	0.743396226	0.86784141	0.800813008
394	1	0	1	1	1	0.855882353	0.144117647	1	0.855882353	0.922345483	0.971085759	0.028914241	0.743396226	0.86784141	0.800813008
394	1	0	1	1	1	0.855882353	0.144117647	1	0.855882353	0.922345483	0.971085759	0.028914241	0.743396226	0.86784141	0.800813008
394	1	0	1	1	1	0.855882353	0.144117647	1	0.855882353	0.922345483	0.971085759	0.028914241	0.743396226	0.86784141	0.800813008
394	1	0	1	1	1	0.855882353	0.144117647	1	0.855882353	0.922345483	0.971085759	0.028914241	0.743396226	0.86784141	0.800813008
394	1	0	1	1	1	0.855882353	0.144117647	1	0.855882353	0.922345483	0.971085759	0.028914241	0.743396226	0.86784141	0.800813008
394	1	0	1	1	1	0.855882353	0.144117647	1	0.855882353	0.922345483	0.971085759	0.028914241	0.743396226	0.86784141	0.800813008
394	1	0	1	1	1	0.855882353	0.144117647	1	0.855882353	0.922345483	0.971085759	0.028914241	0.743396226	0.86784141	0.800813008
394	1	0	1	1	1	0.855882353	0.144117647	1	0.855882353	0.922345483	0.971085759	0.028914241	0.743396226	0.86784141	0.800813008
394	1	0	1	1	1	0.855882353	0.144117647	1	0.855882353	0.922345483	0.971085759	0.028914241	0.743396226	0.86784141	0.800813008
394	1	0	1	1	1	0.855882353	0.144117647	1	0.855882353	0.922345483	0.971085759	0.028914241	0.743396226	0.86784141	0.800813008
394	1	0	1	1	1	0.855882353	0.144117647	1	0.855882353	0.922345483	0.971085759	0.028914241	0.743396226	0.86784141	0.800813008
394	1	0	1	1	1	0.855882353	0.144117647	1	0.855882353	0.922345483	0.971085759	0.028914241	0.743396226	0.86784141	0.800813008
394	1	0	1	1	1	0.855882353	0.144117647	1	0.855882353	0.922345483	0.971085759	0.028914241	0.743396226	0.86784141	0.800813008
394	1	0	1	1	1	0.855882353	0.144117647	1	0.855882353	0.922345483	0.971085759	0.028914241	0.743396226	0.86784141	0.800813008
394	1	0	1	1	1	0.855882353	0.144117647	1	0.855882353	0.922345483	0.971085759	0.028914241	0.743396226	0.86784141	0.800813008
394	1	0	1	1	1	0.855882353	0.144117647	1	0.855882353	0.922345483	0.971085759	0.028914241	0.743396226	0.86784141	0.800813008
394	1	0	1	1	1	0.855882353	0.144117647	1	0.855882353	0.922345483	0.971085759	0.028914241	0.743396226	0.86784141	0.800813008
394	1	0	1	1	1	0.855882353	0.144117647	1	0.855882353	0.922345483	0.971085759	0.028914241	0.743396226	0.86784141	0.800813008
394	1	0	1	1	1	0.855882353	0.144117647	1	0.855882353	0.922345483	0.971085759	0.028914241	0.743396226	0.86784141	0.800813008
394	1	0	1	1	1	0.855882353	0.144117647	1	0.855882353	0.922345483	0.971085759	0.028914241	0.743396226	0.86784141	0.800813008
394	1	0	1	1	1	0.855882353	0.144117647	1	0.855882353	0.922345483	0.971085759	0.028914241	0.743396226	0.86784141	0.800813008
394	1	0	1	1	1	0.855882353	0.144117647	1	0.855882353	0.922345483	0.971085759	0.028914241	0.743396226	0.86784141	0.800813008
394	1	0	1	1	1	0.855882353	0.144117647	1	0.855882353	0.922345483	0.971085759	0.028914241	0.743396226	0.86784141	0.800813008
394	1	0	1	1	1	0.855882353	0.144117647	1	0.855882353	0.922345483	0.971085759	0.028914241	0.743396226	0.86784141	0.800813008
394	1	0	1	1	1	0.855882353	0.144117647	1	0.855882353	0.922345483	0.971085759	0.028914241	0.743396226	0.86784141	0.800813008
394	1	0	1	1	1	0.855882353	0.144117647	1	0.855882353	0.922345483	0.971085759	0.028914241	0.743396226	0.86784141	0.800813008
394	1	0	1	1	1	0.855882353	0.144117647	1	0.855882353	0.922345483	0.971085759	0.028914241	0.743396226	0.86784141	0.800813008
394	1	0	1	1	1	0.855882353	0.144117647	1	0.855882353	0.922345483	0.971085759	0.028914241	0.743396226	0.86784141	0.800813008
394	1	0	1	1	1	0.855882353	0.144117647	1	0.855882353	0.922345483	0.971085759	0.028914241	0.743396226	0.86784141	0.800813008
394	1	0	1	1	1	0.855882353	0.144117647	1	0.855882353	0.922345483	0.971085759	0.028914241	0.743396226	0.86784141	0.800813008
394	1	0	1	1	1	0.855882353	0.144117647	1	0.855882353	0.922345483	0.971085759	0.028914241	0.743396226	0.86784141	0.800813008
394	1	0	1	1	1	0.855882353	0.144117647	1	0.855882353	0.922345483	0.971085759	0.028914241	0.743396226	0.86784141	0.800813008
394	1	0	1	1	1	0.855882353	0.144117647	1	0.855882353	0.922345483	0.971085759	0.028914241	0.743396226	0.86784141	0.800813008
394	1	0	1	1	1	0.855882353	0.144117647	1	0.855882353	0.922345483	0.971085759	0.028914241	0.743396226	0.86784141	0.800813008
394	1	0	1	1	1	0.855882353	0.144117647	1	0.855882353	0.922345483	0.971085759	0.028914241	0.743396226	0.86784141	0.800813008
394	1	0	1	1	1	0.855882353	0.144117647	1	0.855882353	0.922345483	0.971085759	0.028914241	0.743396226	0.86784141	0.800813008
394	1	0	1	1	1	0.855882353	0.144117647	1	0.855882353	0.922345483	0.971085759	0.028914241	0.743396226	0.86784141	0.800813008
394	1	0	1	1	1	0.855882353	0.144117647	1	0.855882353	0.922345483	0.971085759	0.028914241	0.743396226	0.86784141	0.800813008
394	1	0	1	1	1	0.855882353	0.144117647	1	0.855882353	0.922345483	0.971085759	0.028914241	0.743396226	0.86784141	0.800813008
394	1	0	1	1	1	0.855882353	0.144117647	1	0.855882353	0.922345483	0.971085759	0.028914241	0.743396226	0.86784141	0.800813008
394	1	0	1	1	1	0.855882353	0.144117647	1	0.855882353	0.922345483	0.971085759	0.028914241	0.743396226	0.86784141	0.800813008
394	1	0	1	1	1	0.855882353	0.144117647	1	0.855882353	0.922345483	0.971085759	0.028914241	0.743396226	0.86784141	0.800813008
394	1	0	1	1	1	0.855882353	0.144117647	1	0.855882353	0.922345483	0.971085759	0.028914241	0.743396226	0.86784141	0.800813008
394	1	0	1	1	1	0.855882353	0.144117647	1	0.855882353	0.922345483	0.971085759	0.028914241	0.743396226	0.86784141	0.800813008
394	1	0	1	1	1	0.855882353	0.144117647	1	0.855882353	0.922345483	0.971085759	0.028914241	0.743396226	0.86784141	0.800813008
394	1	0	1	1	1	0.855882353	0.144117647	1	0.855882353	0.922345483	0.971085759	0.028914241	0.743396226	0.86784141	0.800813008
394	1	0	1	1	1	0.855882353	0.144117647	1	0.855882353	0.922345483	0.971085759	0.028914241	0.743396226	0.86784141	0.800813008
394	1	0	1	1	1	0.855882353	0.144117647	1	0.855882353	0.922345483	0.971085759	0.028914241	0.743396226	0.86784141	0.800813008
394	1	0	1	1	1	0.855882353	0.144117647	1	0.855882353	0.922345483	0.971085759	0.028914241	0.743396226	0.86784141	0.800813008
394	1	0	1	1	1	0.855882353	0.144117647	1	0.855882353	0.922345483	0.971085759	0.028914241	0.743396226	0.86784141	0.800813008
394	1	0	1	1	1	0.855882353	0.144117647	1	0.855882353	0.922345483	0.971085759	0.028914241	0.743396226	0.86784141	0.800813008
393	1	0	1	1	1	0.85037037	0.14962963	1	0.85037037	0.919135308	0.971886366	0.028113634	0.753164557	0.867346939	0.806233062
393	1	0	1	1	1	0.85037037	0.14962963	1	0.85037037	0.919135308	0.971886366	0.028113634	0.753164557	0.867346939	0.806233062
393	1	0	1	1	1	0.85037037	0.14962963	1	0.85037037	0.919135308	0.971886366	0.028113634	0.753164557	0.867346939	0.806233062
393	1	0	1	1	1	0.85037037	0.14962963	1	0.85037037	0.919135308	0.971886366	0.028113634	0.753164557	0.867346939	0.806233062
393	1	0	1	1	1	0.85037037	0.14962963	1	0.85037037	0.919135308	0.971886366	0.028113634	0.753164557	0.867346939	0.806233062
393	1	0	1	1	1	0.85037037	0.14962963	1	0.85037037	0.919135308	0.971886366	0.028113634	0.753164557	0.867346939	0.806233062
393	1	0	1	1	1	0.85037037	0.14962963	1	0.85037037	0.919135308	0.971886366	0.028113634	0.753164557	0.867346939	0.806233062
393	1	0	1	1	1	0.85037037	0.14962963	1	0.85037037	0.919135308	0.971886366	0.028113634	0.753164557	0.867346939	0.806233062
393	1	0	1	1	1	0.85037037	0.14962963	1	0.85037037	0.919135308	0.971886366	0.028113634	0.753164557	0.867346939	0.806233062
393	1	0	1	1	1	0.85037037	0.14962963	1	0.85037037	0.919135308	0.971886366	0.028113634	0.753164557	0.867346939	0.806233062
393	1	0	1	1	1	0.85037037	0.14962963	1	0.85037037	0.919135308	0.971886366	0.028113634	0.753164557	0.867346939	0.806233062
393	1	0	1	1	1	0.85037037	0.14962963	1	0.85037037	0.919135308	0.971886366	0.028113634	0.753164557	0.867346939	0.806233062
393	1	0	1	1	1	0.85037037	0.14962963	1	0.85037037	0.919135308	0.971886366	0.028113634	0.753164557	0.867346939	0.806233062
393	1	0	1	1	1	0.85037037	0.14962963	1	0.85037037	0.919135308	0.971886366	0.028113634	0.753164557	0.867346939	0.806233062
393	1	0	1	1	1	0.85037037	0.14962963	1	0.85037037	0.919135308	0.971886366	0.028113634	0.753164557	0.867346939	0.806233062
393	1	0	1	1	1	0.85037037	0.14962963	1	0.85037037	0.919135308	0.971886366	0.028113634	0.753164557	0.867346939	0.806233062
393	1	0	1	1	1	0.85037037	0.14962963	1	0.85037037	0.919135308	0.971886366	0.028113634	0.753164557	0.867346939	0.806233062
393	1	0	1	1	1	0.85037037	0.14962963	1	0.85037037	0.919135308	0.971886366	0.028113634	0.753164557	0.867346939	0.806233062
393	1	0	1	1	1	0.85037037	0.14962963	1	0.85037037	0.919135308	0.971886366	0.028113634	0.753164557	0.867346939	0.806233062
393	1	0	1	1	1	0.85037037	0.14962963	1	0.85037037	0.919135308	0.971886366	0.028113634	0.753164557	0.867346939	0.806233062
393	1	0	1	1	1	0.85037037	0.14962963	1	0.85037037	0.919135308	0.971886366	0.028113634	0.753164557	0.867346939	0.806233062
393	1	0	1	1	1	0.85037037	0.14962963	1	0.85037037	0.919135308	0.971886366	0.028113634	0.753164557	0.867346939	0.806233062
393	1	0	1	1	1	0.85037037	0.14962963	1	0.85037037	0.919135308	0.971886366	0.028113634	0.753164557	0.867346939	0.806233062
393	1	0	1	1	1	0.85037037	0.14962963	1	0.85037037	0.919135308	0.971886366	0.028113634	0.753164557	0.867346939	0.806233062
393	1	0	1	1	1	0.85037037	0.14962963	1	0.85037037	0.919135308	0.971886366	0.028113634	0.753164557	0.867346939	0.806233062
393	1	0	1	1	1	0.85037037	0.14962963	1	0.85037037	0.919135308	0.971886366	0.028113634	0.753164557	0.867346939	0.806233062
393	1	0	1	1	1	0.85037037	0.14962963	1	0.85037037	0.919135308	0.971886366	0.028113634	0.753164557	0.867346939	0.806233062
393	1	0	1	1	1	0.85037037	0.14962963	1	0.85037037	0.919135308	0.971886366	0.028113634	0.753164557	0.867346939	0.806233062
393	1	0	1	1	1	0.85037037	0.14962963	1	0.85037037	0.919135308	0.971886366	0.028113634	0.753164557	0.867346939	0.806233062
393	1	0	1	1	1	0.85037037	0.14962963	1	0.85037037	0.919135308	0.971886366	0.028113634	0.753164557	0.867346939	0.806233062
393	1	0	1	1	1	0.85037037	0.14962963	1	0.85037037	0.919135308	0.971886366	0.028113634	0.753164557	0.867346939	0.806233062
393	1	0	1	1	1	0.85037037	0.14962963	1	0.85037037	0.919135308	0.971886366	0.028113634	0.753164557	0.867346939	0.806233062
393	1	0	1	1	1	0.85037037	0.14962963	1	0.85037037	0.919135308	0.971886366	0.028113634	0.753164557	0.867346939	0.806233062
393	1	0	1	1	1	0.85037037	0.14962963	1	0.85037037	0.919135308	0.971886366	0.028113634	0.753164557	0.867346939	0.806233062
393	1	0	1	1	1	0.85037037	0.14962963	1	0.85037037	0.919135308	0.971886366	0.028113634	0.753164557	0.867346939	0.806233062
393	1	0	1	1	1	0.85037037	0.14962963	1	0.85037037	0.919135308	0.971886366	0.028113634	0.753164557	0.867346939	0.806233062
393	1	0	1	1	1	0.85037037	0.14962963	1	0.85037037	0.919135308	0.971886366	0.028113634	0.753164557	0.867346939	0.806233062
393	1	0	1	1	1	0.85037037	0.14962963	1	0.85037037	0.919135308	0.971886366	0.028113634	0.753164557	0.867346939	0.806233062
393	1	0	1	1	1	0.85037037	0.14962963	1	0.85037037	0.919135308	0.971886366	0.028113634	0.753164557	0.867346939	0.806233062
393	1	0	1	1	1	0.85037037	0.14962963	1	0.85037037	0.919135308	0.971886366	0.028113634	0.753164557	0.867346939	0.806233062
393	1	0	1	1	1	0.85037037	0.14962963	1	0.85037037	0.919135308	0.971886366	0.028113634	0.753164557	0.867346939	0.806233062
393	1	0	1	1	1	0.85037037	0.14962963	1	0.85037037	0.919135308	0.971886366	0.028113634	0.753164557	0.867346939	0.806233062
393	1	0	1	1	1	0.85037037	0.14962963	1	0.85037037	0.919135308	0.971886366	0.028113634	0.753164557	0.867346939	0.806233062
393	1	0	1	1	1	0.85037037	0.14962963	1	0.85037037	0.919135308	0.971886366	0.028113634	0.753164557	0.867346939	0.806233062
393	1	0	1	1	1	0.85037037	0.14962963	1	0.85037037	0.919135308	0.971886366	0.028113634	0.753164557	0.867346939	0.806233062
393	1	0	1	1	1	0.85037037	0.14962963	1	0.85037037	0.919135308	0.971886366	0.028113634	0.753164557	0.867346939	0.806233062
393	1	0	1	1	1	0.85037037	0.14962963	1	0.85037037	0.919135308	0.971886366	0.028113634	0.753164557	0.867346939	0.806233062
393	1	0	1	1	1	0.85037037	0.14962963	1	0.85037037	0.919135308	0.971886366	0.028113634	0.753164557	0.867346939	0.806233062
393	1	0	1	1	1	0.85037037	0.14962963	1	0.85037037	0.919135308	0.971886366	0.028113634	0.753164557	0.867346939	0.806233062
393	1	0	1	1	1	0.85037037	0.14962963	1	0.85037037	0.919135308	0.971886366	0.028113634	0.753164557	0.867346939	0.806233062
393	1	0	1	1	1	0.85037037	0.14962963	1	0.85037037	0.919135308	0.971886366	0.028113634	0.753164557	0.867346939	0.806233062
393	1	0	1	1	1	0.85037037	0.14962963	1	0.85037037	0.919135308	0.971886366	0.028113634	0.753164557	0.867346939	0.806233062
393	1	0	1	1	1	0.85037037	0.14962963	1	0.85037037	0.919135308	0.971886366	0.028113634	0.753164557	0.867346939	0.806233062
393	1	0	1	1	1	0.85037037	0.14962963	1	0.85037037	0.919135308	0.971886366	0.028113634	0.753164557	0.867346939	0.806233062
393	1	0	1	1	1	0.85037037	0.14962963	1	0.85037037	0.919135308	0.971886366	0.028113634	0.753164557	0.867346939	0.806233062
393	1	0	1	1	1	0.85037037	0.14962963	1	0.85037037	0.919135308	0.971886366	0.028113634	0.753164557	0.867346939	0.806233062
393	1	0	1	1	1	0.85037037	0.14962963	1	0.85037037	0.919135308	0.971886366	0.028113634	0.753164557	0.867346939	0.806233062
393	1	0	1	1	1	0.85037037	0.14962963	1	0.85037037	0.919135308	0.971886366	0.028113634	0.753164557	0.867346939	0.806233062
393	1	0	1	1	1	0.85037037	0.14962963	1	0.85037037	0.919135308	0.971886366	0.028113634	0.753164557	0.867346939	0.806233062
393	1	0	1	1	1	0.85037037	0.14962963	1	0.85037037	0.919135308	0.971886366	0.028113634	0.753164557	0.867346939	0.806233062
393	1	0	1	1	1	0.85037037	0.14962963	1	0.85037037	0.919135308	0.971886366	0.028113634	0.753164557	0.867346939	0.806233062
393	1	0	1	1	1	0.85037037	0.14962963	1	0.85037037	0.919135308	0.971886366	0.028113634	0.753164557	0.867346939	0.806233062
393	1	0	1	1	1	0.85037037	0.14962963	1	0.85037037	0.919135308	0.971886366	0.028113634	0.753164557	0.867346939	0.806233062
393	1	0	1	1	1	0.85037037	0.14962963	1	0.85037037	0.919135308	0.971886366	0.028113634	0.753164557	0.867346939	0.806233062
393	1	0	1	1	1	0.85037037	0.14962963	1	0.85037037	0.919135308	0.971886366	0.028113634	0.753164557	0.867346939	0.806233062
393	1	0	1	1	1	0.85037037	0.14962963	1	0.85037037	0.919135308	0.971886366	0.028113634	0.753164557	0.867346939	0.806233062
393	1	0	1	1	1	0.85037037	0.14962963	1	0.85037037	0.919135308	0.971886366	0.028113634	0.753164557	0.867346939	0.806233062
393	1	0	1	1	1	0.85037037	0.14962963	1	0.85037037	0.919135308	0.971886366	0.028113634	0.753164557	0.867346939	0.806233062
393	1	0	1	1	1	0.85037037	0.14962963	1	0.85037037	0.919135308	0.971886366	0.028113634	0.753164557	0.867346939	0.806233062
393	1	0	1	1	1	0.85037037	0.14962963	1	0.85037037	0.919135308	0.971886366	0.028113634	0.753164557	0.867346939	0.806233062
393	1	0	1	1	1	0.85037037	0.14962963	1	0.85037037	0.919135308	0.971886366	0.028113634	0.753164557	0.867346939	0.806233062
393	1	0	1	1	1	0.85037037	0.14962963	1	0.85037037	0.919135308	0.971886366	0.028113634	0.753164557	0.867346939	0.806233062
393	1	0	1	1	1	0.85037037	0.14962963	1	0.85037037	0.919135308	0.971886366	0.028113634	0.753164557	0.867346939	0.806233062
393	1	0	1	1	1	0.85037037	0.14962963	1	0.85037037	0.919135308	0.971886366	0.028113634	0.753164557	0.867346939	0.806233062
393	1	0	1	1	1	0.85037037	0.14962963	1	0.85037037	0.919135308	0.971886366	0.028113634	0.753164557	0.867346939	0.806233062
393	1	0	1	1	1	0.85037037	0.14962963	1	0.85037037	0.919135308	0.971886366	0.028113634	0.753164557	0.867346939	0.806233062
393	1	0	1	1	1	0.85037037	0.14962963	1	0.85037037	0.919135308	0.971886366	0.028113634	0.753164557	0.867346939	0.806233062
393	1	0	1	1	1	0.85037037	0.14962963	1	0.85037037	0.919135308	0.971886366	0.028113634	0.753164557	0.867346939	0.806233062
393	1	0	1	1	1	0.85037037	0.14962963	1	0.85037037	0.919135308	0.971886366	0.028113634	0.753164557	0.867346939	0.806233062
393	1	0	1	1	1	0.85037037	0.14962963	1	0.85037037	0.919135308	0.971886366	0.028113634	0.753164557	0.867346939	0.806233062
393	1	0	1	1	1	0.85037037	0.14962963	1	0.85037037	0.919135308	0.971886366	0.028113634	0.753164557	0.867346939	0.806233062
393	1	0	1	1	1	0.85037037	0.14962963	1	0.85037037	0.919135308	0.971886366	0.028113634	0.753164557	0.867346939	0.806233062
393	1	0	1	1	1	0.85037037	0.14962963	1	0.85037037	0.919135308	0.971886366	0.028113634	0.753164557	0.867346939	0.806233062
393	1	0	1	1	1	0.85037037	0.14962963	1	0.85037037	0.919135308	0.971886366	0.028113634	0.753164557	0.867346939	0.806233062
393	1	0	1	1	1	0.85037037	0.14962963	1	0.85037037	0.919135308	0.971886366	0.028113634	0.753164557	0.867346939	0.806233062
393	1	0	1	1	1	0.85037037	0.14962963	1	0.85037037	0.919135308	0.971886366	0.028113634	0.753164557	0.867346939	0.806233062
393	1	0	1	1	1	0.85037037	0.14962963	1	0.85037037	0.919135308	0.971886366	0.028113634	0.753164557	0.867346939	0.806233062
393	1	0	1	1	1	0.85037037	0.14962963	1	0.85037037	0.919135308	0.971886366	0.028113634	0.753164557	0.867346939	0.806233062
393	1	0	1	1	1	0.85037037	0.14962963	1	0.85037037	0.919135308	0.971886366	0.028113634	0.753164557	0.867346939	0.806233062
393	1	0	1	1	1	0.85037037	0.14962963	1	0.85037037	0.919135308	0.971886366	0.028113634	0.753164557	0.867346939	0.806233062
393	1	0	1	1	1	0.85037037	0.14962963	1	0.85037037	0.919135308	0.971886366	0.028113634	0.753164557	0.867346939	0.806233062
393	1	0	1	1	1	0.85037037	0.14962963	1	0.85037037	0.919135308	0.971886366	0.028113634	0.753164557	0.867346939	0.806233062
393	1	0	1	1	1	0.85037037	0.14962963	1	0.85037037	0.919135308	0.971886366	0.028113634	0.753164557	0.867346939	0.806233062
393	1	0	1	1	1	0.85037037	0.14962963	1	0.85037037	0.919135308	0.971886366	0.028113634	0.753164557	0.867346939	0.806233062
393	1	0	1	1	1	0.85037037	0.14962963	1	0.85037037	0.919135308	0.971886366	0.028113634	0.753164557	0.867346939	0.806233062
393	1	0	1	1	1	0.85037037	0.14962963	1	0.85037037	0.919135308	0.971886366	0.028113634	0.753164557	0.867346939	0.806233062
393	1	0	1	1	1	0.85037037	0.14962963	1	0.85037037	0.919135308	0.971886366	0.028113634	0.753164557	0.867346939	0.806233062
393	1	0	1	1	1	0.85037037	0.14962963	1	0.85037037	0.919135308	0.971886366	0.028113634	0.753164557	0.867346939	0.806233062
393	1	0	1	1	1	0.85037037	0.14962963	1	0.85037037	0.919135308	0.971886366	0.028113634	0.753164557	0.867346939	0.806233062
393	1	0	1	1	1	0.85037037	0.14962963	1	0.85037037	0.919135308	0.971886366	0.028113634	0.753164557	0.867346939	0.806233062
393	1	0	1	1	1	0.85037037	0.14962963	1	0.85037037	0.919135308	0.971886366	0.028113634	0.753164557	0.867346939	0.806233062
393	1	0	1	1	1	0.85037037	0.14962963	1	0.85037037	0.919135308	0.971886366	0.028113634	0.753164557	0.867346939	0.806233062
393	1	0	1	1	1	0.85037037	0.14962963	1	0.85037037	0.919135308	0.971886366	0.028113634	0.753164557	0.867346939	0.806233062
393	1	0	1	1	1	0.85037037	0.14962963	1	0.85037037	0.919135308	0.971886366	0.028113634	0.753164557	0.867346939	0.806233062
393	1	0	1	1	1	0.85037037	0.14962963	1	0.85037037	0.919135308	0.971886366	0.028113634	0.753164557	0.867346939	0.806233062
393	1	0	1	1	1	0.85037037	0.14962963	1	0.85037037	0.919135308	0.971886366	0.028113634	0.753164557	0.867346939	0.806233062
393	1	0	1	1	1	0.85037037	0.14962963	1	0.85037037	0.919135308	0.971886366	0.028113634	0.753164557	0.867346939	0.806233062
393	1	0	1	1	1	0.85037037	0.14962963	1	0.85037037	0.919135308	0.971886366	0.028113634	0.753164557	0.867346939	0.806233062
393	1	0	1	1	1	0.85037037	0.14962963	1	0.85037037	0.919135308	0.971886366	0.028113634	0.753164557	0.867346939	0.806233062
393	1	0	1	1	1	0.85037037	0.14962963	1	0.85037037	0.919135308	0.971886366	0.028113634	0.753164557	0.867346939	0.806233062
393	1	0	1	1	1	0.85037037	0.14962963	1	0.85037037	0.919135308	0.971886366	0.028113634	0.753164557	0.867346939	0.806233062
393	1	0	1	1	1	0.85037037	0.14962963	1	0.85037037	0.919135308	0.971886366	0.028113634	0.753164557	0.867346939	0.806233062
393	1	0	1	1	1	0.85037037	0.14962963	1	0.85037037	0.919135308	0.971886366	0.028113634	0.753164557	0.867346939	0.806233062
393	1	0	1	1	1	0.85037037	0.14962963	1	0.85037037	0.919135308	0.971886366	0.028113634	0.753164557	0.867346939	0.806233062
393	1	0	1	1	1	0.85037037	0.14962963	1	0.85037037	0.919135308	0.971886366	0.028113634	0.753164557	0.867346939	0.806233062
393	1	0	1	1	1	0.85037037	0.14962963	1	0.85037037	0.919135308	0.971886366	0.028113634	0.753164557	0.867346939	0.806233062
393	1	0	1	1	1	0.85037037	0.14962963	1	0.85037037	0.919135308	0.971886366	0.028113634	0.753164557	0.867346939	0.806233062
393	1	0	1	1	1	0.85037037	0.14962963	1	0.85037037	0.919135308	0.971886366	0.028113634	0.753164557	0.867346939	0.806233062
393	1	0	1	1	1	0.85037037	0.14962963	1	0.85037037	0.919135308	0.971886366	0.028113634	0.753164557	0.867346939	0.806233062
393	1	0	1	1	1	0.85037037	0.14962963	1	0.85037037	0.919135308	0.971886366	0.028113634	0.753164557	0.867346939	0.806233062
393	1	0	1	1	1	0.85037037	0.14962963	1	0.85037037	0.919135308	0.971886366	0.028113634	0.753164557	0.867346939	0.806233062
393	1	0	1	1	1	0.85037037	0.14962963	1	0.85037037	0.919135308	0.971886366	0.028113634	0.753164557	0.867346939	0.806233062
393	1	0	1	1	1	0.85037037	0.14962963	1	0.85037037	0.919135308	0.971886366	0.028113634	0.753164557	0.867346939	0.806233062
393	1	0	1	1	1	0.85037037	0.14962963	1	0.85037037	0.919135308	0.971886366	0.028113634	0.753164557	0.867346939	0.806233062
393	1	0	1	1	1	0.85037037	0.14962963	1	0.85037037	0.919135308	0.971886366	0.028113634	0.753164557	0.867346939	0.806233062
393	1	0	1	1	1	0.85037037	0.14962963	1	0.85037037	0.919135308	0.971886366	0.028113634	0.753164557	0.867346939	0.806233062
393	1	0	1	1	1	0.85037037	0.14962963	1	0.85037037	0.919135308	0.971886366	0.028113634	0.753164557	0.867346939	0.806233062
393	1	0	1	1	1	0.85037037	0.14962963	1	0.85037037	0.919135308	0.971886366	0.028113634	0.753164557	0.867346939	0.806233062
393	1	0	1	1	1	0.85037037	0.14962963	1	0.85037037	0.919135308	0.971886366	0.028113634	0.753164557	0.867346939	0.806233062
