# Supplementary material for: An Improved Hybrid Feature Selection Algorithm for Electric Charge Recovery Risk
Source: Hindawi journal article supplement (doi:10.1155/2020/8479341), 2020-08-28
Supplement: f1 [file 8479341.f1.zip › 8479341.f1/Experimental Results/201807/CBPSO_results.csv]

features_num	Accuracy_high	Loss_high	Precission_high	Recall_high	F1_high	Accuracy_med	Loss_med	Precission_med	Recall_med	F1_med	Accuracy_low	Loss_low	Precission_low	Recall_low	F1_low
342	1.0	0.0	1.0	1.0	1.0	0.7728613569321534	0.2271386430678466	0.9274809160305344	0.8073089700996677	0.8632326820603907	0.9126961483594864	0.08730385164051357	0.5530085959885387	0.724202626641651	0.6271324126726239
342	1.0	0.0	1.0	1.0	1.0	0.7728613569321534	0.2271386430678466	0.9274809160305344	0.8073089700996677	0.8632326820603907	0.9126961483594864	0.08730385164051357	0.5530085959885387	0.724202626641651	0.6271324126726239
342	1.0	0.0	1.0	1.0	1.0	0.7728613569321534	0.2271386430678466	0.9274809160305344	0.8073089700996677	0.8632326820603907	0.9126961483594864	0.08730385164051357	0.5530085959885387	0.724202626641651	0.6271324126726239
342	1.0	0.0	1.0	1.0	1.0	0.7728613569321534	0.2271386430678466	0.9274809160305344	0.8073089700996677	0.8632326820603907	0.9126961483594864	0.08730385164051357	0.5530085959885387	0.724202626641651	0.6271324126726239
342	1.0	0.0	1.0	1.0	1.0	0.7728613569321534	0.2271386430678466	0.9274809160305344	0.8073089700996677	0.8632326820603907	0.9126961483594864	0.08730385164051357	0.5530085959885387	0.724202626641651	0.6271324126726239
342	1.0	0.0	1.0	1.0	1.0	0.7728613569321534	0.2271386430678466	0.9274809160305344	0.8073089700996677	0.8632326820603907	0.9126961483594864	0.08730385164051357	0.5530085959885387	0.724202626641651	0.6271324126726239
342	1.0	0.0	1.0	1.0	1.0	0.7728613569321534	0.2271386430678466	0.9274809160305344	0.8073089700996677	0.8632326820603907	0.9126961483594864	0.08730385164051357	0.5530085959885387	0.724202626641651	0.6271324126726239
342	1.0	0.0	1.0	1.0	1.0	0.7728613569321534	0.2271386430678466	0.9274809160305344	0.8073089700996677	0.8632326820603907	0.9126961483594864	0.08730385164051357	0.5530085959885387	0.724202626641651	0.6271324126726239
342	1.0	0.0	1.0	1.0	1.0	0.7728613569321534	0.2271386430678466	0.9274809160305344	0.8073089700996677	0.8632326820603907	0.9126961483594864	0.08730385164051357	0.5530085959885387	0.724202626641651	0.6271324126726239
367	1.0	0.0	1.0	1.0	1.0	0.8681177976952625	0.13188220230473746	0.9710982658959537	0.8900662251655629	0.9288182446440912	0.943812375249501	0.05618762475049899	0.497907949790795	0.851520572450805	0.6283828382838285
367	1.0	0.0	1.0	1.0	1.0	0.8681177976952625	0.13188220230473746	0.9710982658959537	0.8900662251655629	0.9288182446440912	0.943812375249501	0.05618762475049899	0.497907949790795	0.851520572450805	0.6283828382838285
367	1.0	0.0	1.0	1.0	1.0	0.8681177976952625	0.13188220230473746	0.9710982658959537	0.8900662251655629	0.9288182446440912	0.943812375249501	0.05618762475049899	0.497907949790795	0.851520572450805	0.6283828382838285
367	1.0	0.0	1.0	1.0	1.0	0.8681177976952625	0.13188220230473746	0.9710982658959537	0.8900662251655629	0.9288182446440912	0.943812375249501	0.05618762475049899	0.497907949790795	0.851520572450805	0.6283828382838285
367	1.0	0.0	1.0	1.0	1.0	0.8681177976952625	0.13188220230473746	0.9710982658959537	0.8900662251655629	0.9288182446440912	0.943812375249501	0.05618762475049899	0.497907949790795	0.851520572450805	0.6283828382838285
367	1.0	0.0	1.0	1.0	1.0	0.8681177976952625	0.13188220230473746	0.9710982658959537	0.8900662251655629	0.9288182446440912	0.943812375249501	0.05618762475049899	0.497907949790795	0.851520572450805	0.6283828382838285
367	1.0	0.0	1.0	1.0	1.0	0.8681177976952625	0.13188220230473746	0.9710982658959537	0.8900662251655629	0.9288182446440912	0.943812375249501	0.05618762475049899	0.497907949790795	0.851520572450805	0.6283828382838285
367	1.0	0.0	1.0	1.0	1.0	0.8681177976952625	0.13188220230473746	0.9710982658959537	0.8900662251655629	0.9288182446440912	0.943812375249501	0.05618762475049899	0.497907949790795	0.851520572450805	0.6283828382838285
367	1.0	0.0	1.0	1.0	1.0	0.8681177976952625	0.13188220230473746	0.9710982658959537	0.8900662251655629	0.9288182446440912	0.943812375249501	0.05618762475049899	0.497907949790795	0.851520572450805	0.6283828382838285
367	1.0	0.0	1.0	1.0	1.0	0.8681177976952625	0.13188220230473746	0.9710982658959537	0.8900662251655629	0.9288182446440912	0.943812375249501	0.05618762475049899	0.497907949790795	0.851520572450805	0.6283828382838285
367	1.0	0.0	1.0	1.0	1.0	0.8681177976952625	0.13188220230473746	0.9710982658959537	0.8900662251655629	0.9288182446440912	0.943812375249501	0.05618762475049899	0.497907949790795	0.851520572450805	0.6283828382838285
367	1.0	0.0	1.0	1.0	1.0	0.8681177976952625	0.13188220230473746	0.9710982658959537	0.8900662251655629	0.9288182446440912	0.943812375249501	0.05618762475049899	0.497907949790795	0.851520572450805	0.6283828382838285
367	1.0	0.0	1.0	1.0	1.0	0.8681177976952625	0.13188220230473746	0.9710982658959537	0.8900662251655629	0.9288182446440912	0.943812375249501	0.05618762475049899	0.497907949790795	0.851520572450805	0.6283828382838285
367	1.0	0.0	1.0	1.0	1.0	0.8681177976952625	0.13188220230473746	0.9710982658959537	0.8900662251655629	0.9288182446440912	0.943812375249501	0.05618762475049899	0.497907949790795	0.851520572450805	0.6283828382838285
367	1.0	0.0	1.0	1.0	1.0	0.8681177976952625	0.13188220230473746	0.9710982658959537	0.8900662251655629	0.9288182446440912	0.943812375249501	0.05618762475049899	0.497907949790795	0.851520572450805	0.6283828382838285
367	1.0	0.0	1.0	1.0	1.0	0.8681177976952625	0.13188220230473746	0.9710982658959537	0.8900662251655629	0.9288182446440912	0.943812375249501	0.05618762475049899	0.497907949790795	0.851520572450805	0.6283828382838285
367	1.0	0.0	1.0	1.0	1.0	0.8681177976952625	0.13188220230473746	0.9710982658959537	0.8900662251655629	0.9288182446440912	0.943812375249501	0.05618762475049899	0.497907949790795	0.851520572450805	0.6283828382838285
367	1.0	0.0	1.0	1.0	1.0	0.8681177976952625	0.13188220230473746	0.9710982658959537	0.8900662251655629	0.9288182446440912	0.943812375249501	0.05618762475049899	0.497907949790795	0.851520572450805	0.6283828382838285
367	1.0	0.0	1.0	1.0	1.0	0.8681177976952625	0.13188220230473746	0.9710982658959537	0.8900662251655629	0.9288182446440912	0.943812375249501	0.05618762475049899	0.497907949790795	0.851520572450805	0.6283828382838285
367	1.0	0.0	1.0	1.0	1.0	0.8681177976952625	0.13188220230473746	0.9710982658959537	0.8900662251655629	0.9288182446440912	0.943812375249501	0.05618762475049899	0.497907949790795	0.851520572450805	0.6283828382838285
367	1.0	0.0	1.0	1.0	1.0	0.8681177976952625	0.13188220230473746	0.9710982658959537	0.8900662251655629	0.9288182446440912	0.943812375249501	0.05618762475049899	0.497907949790795	0.851520572450805	0.6283828382838285
367	1.0	0.0	1.0	1.0	1.0	0.8681177976952625	0.13188220230473746	0.9710982658959537	0.8900662251655629	0.9288182446440912	0.943812375249501	0.05618762475049899	0.497907949790795	0.851520572450805	0.6283828382838285
367	1.0	0.0	1.0	1.0	1.0	0.8681177976952625	0.13188220230473746	0.9710982658959537	0.8900662251655629	0.9288182446440912	0.943812375249501	0.05618762475049899	0.497907949790795	0.851520572450805	0.6283828382838285
367	1.0	0.0	1.0	1.0	1.0	0.8681177976952625	0.13188220230473746	0.9710982658959537	0.8900662251655629	0.9288182446440912	0.943812375249501	0.05618762475049899	0.497907949790795	0.851520572450805	0.6283828382838285
367	1.0	0.0	1.0	1.0	1.0	0.8681177976952625	0.13188220230473746	0.9710982658959537	0.8900662251655629	0.9288182446440912	0.943812375249501	0.05618762475049899	0.497907949790795	0.851520572450805	0.6283828382838285
367	1.0	0.0	1.0	1.0	1.0	0.8681177976952625	0.13188220230473746	0.9710982658959537	0.8900662251655629	0.9288182446440912	0.943812375249501	0.05618762475049899	0.497907949790795	0.851520572450805	0.6283828382838285
367	1.0	0.0	1.0	1.0	1.0	0.8681177976952625	0.13188220230473746	0.9710982658959537	0.8900662251655629	0.9288182446440912	0.943812375249501	0.05618762475049899	0.497907949790795	0.851520572450805	0.6283828382838285
367	1.0	0.0	1.0	1.0	1.0	0.8681177976952625	0.13188220230473746	0.9710982658959537	0.8900662251655629	0.9288182446440912	0.943812375249501	0.05618762475049899	0.497907949790795	0.851520572450805	0.6283828382838285
367	1.0	0.0	1.0	1.0	1.0	0.8681177976952625	0.13188220230473746	0.9710982658959537	0.8900662251655629	0.9288182446440912	0.943812375249501	0.05618762475049899	0.497907949790795	0.851520572450805	0.6283828382838285
367	1.0	0.0	1.0	1.0	1.0	0.8681177976952625	0.13188220230473746	0.9710982658959537	0.8900662251655629	0.9288182446440912	0.943812375249501	0.05618762475049899	0.497907949790795	0.851520572450805	0.6283828382838285
367	1.0	0.0	1.0	1.0	1.0	0.8681177976952625	0.13188220230473746	0.9710982658959537	0.8900662251655629	0.9288182446440912	0.943812375249501	0.05618762475049899	0.497907949790795	0.851520572450805	0.6283828382838285
389	1.0	0.0	1.0	1.0	1.0	0.9233766233766234	0.0766233766233766	1.0	0.9233766233766234	0.9601620526671168	0.9476398254660849	0.05236017453391506	0.5331412103746398	0.9296482412060302	0.6776556776556776
389	1.0	0.0	1.0	1.0	1.0	0.9233766233766234	0.0766233766233766	1.0	0.9233766233766234	0.9601620526671168	0.9476398254660849	0.05236017453391506	0.5331412103746398	0.9296482412060302	0.6776556776556776
389	1.0	0.0	1.0	1.0	1.0	0.9233766233766234	0.0766233766233766	1.0	0.9233766233766234	0.9601620526671168	0.9476398254660849	0.05236017453391506	0.5331412103746398	0.9296482412060302	0.6776556776556776
389	1.0	0.0	1.0	1.0	1.0	0.9233766233766234	0.0766233766233766	1.0	0.9233766233766234	0.9601620526671168	0.9476398254660849	0.05236017453391506	0.5331412103746398	0.9296482412060302	0.6776556776556776
389	1.0	0.0	1.0	1.0	1.0	0.9233766233766234	0.0766233766233766	1.0	0.9233766233766234	0.9601620526671168	0.9476398254660849	0.05236017453391506	0.5331412103746398	0.9296482412060302	0.6776556776556776
389	1.0	0.0	1.0	1.0	1.0	0.9233766233766234	0.0766233766233766	1.0	0.9233766233766234	0.9601620526671168	0.9476398254660849	0.05236017453391506	0.5331412103746398	0.9296482412060302	0.6776556776556776
389	1.0	0.0	1.0	1.0	1.0	0.9233766233766234	0.0766233766233766	1.0	0.9233766233766234	0.9601620526671168	0.9476398254660849	0.05236017453391506	0.5331412103746398	0.9296482412060302	0.6776556776556776
389	1.0	0.0	1.0	1.0	1.0	0.9233766233766234	0.0766233766233766	1.0	0.9233766233766234	0.9601620526671168	0.9476398254660849	0.05236017453391506	0.5331412103746398	0.9296482412060302	0.6776556776556776
389	1.0	0.0	1.0	1.0	1.0	0.9233766233766234	0.0766233766233766	1.0	0.9233766233766234	0.9601620526671168	0.9476398254660849	0.05236017453391506	0.5331412103746398	0.9296482412060302	0.6776556776556776
389	1.0	0.0	1.0	1.0	1.0	0.9233766233766234	0.0766233766233766	1.0	0.9233766233766234	0.9601620526671168	0.9476398254660849	0.05236017453391506	0.5331412103746398	0.9296482412060302	0.6776556776556776
389	1.0	0.0	1.0	1.0	1.0	0.9233766233766234	0.0766233766233766	1.0	0.9233766233766234	0.9601620526671168	0.9476398254660849	0.05236017453391506	0.5331412103746398	0.9296482412060302	0.6776556776556776
389	1.0	0.0	1.0	1.0	1.0	0.9233766233766234	0.0766233766233766	1.0	0.9233766233766234	0.9601620526671168	0.9476398254660849	0.05236017453391506	0.5331412103746398	0.9296482412060302	0.6776556776556776
389	1.0	0.0	1.0	1.0	1.0	0.9233766233766234	0.0766233766233766	1.0	0.9233766233766234	0.9601620526671168	0.9476398254660849	0.05236017453391506	0.5331412103746398	0.9296482412060302	0.6776556776556776
389	1.0	0.0	1.0	1.0	1.0	0.9233766233766234	0.0766233766233766	1.0	0.9233766233766234	0.9601620526671168	0.9476398254660849	0.05236017453391506	0.5331412103746398	0.9296482412060302	0.6776556776556776
389	1.0	0.0	1.0	1.0	1.0	0.9233766233766234	0.0766233766233766	1.0	0.9233766233766234	0.9601620526671168	0.9476398254660849	0.05236017453391506	0.5331412103746398	0.9296482412060302	0.6776556776556776
389	1.0	0.0	1.0	1.0	1.0	0.9233766233766234	0.0766233766233766	1.0	0.9233766233766234	0.9601620526671168	0.9476398254660849	0.05236017453391506	0.5331412103746398	0.9296482412060302	0.6776556776556776
389	1.0	0.0	1.0	1.0	1.0	0.9233766233766234	0.0766233766233766	1.0	0.9233766233766234	0.9601620526671168	0.9476398254660849	0.05236017453391506	0.5331412103746398	0.9296482412060302	0.6776556776556776
389	1.0	0.0	1.0	1.0	1.0	0.9233766233766234	0.0766233766233766	1.0	0.9233766233766234	0.9601620526671168	0.9476398254660849	0.05236017453391506	0.5331412103746398	0.9296482412060302	0.6776556776556776
389	1.0	0.0	1.0	1.0	1.0	0.9233766233766234	0.0766233766233766	1.0	0.9233766233766234	0.9601620526671168	0.9476398254660849	0.05236017453391506	0.5331412103746398	0.9296482412060302	0.6776556776556776
389	1.0	0.0	1.0	1.0	1.0	0.9233766233766234	0.0766233766233766	1.0	0.9233766233766234	0.9601620526671168	0.9476398254660849	0.05236017453391506	0.5331412103746398	0.9296482412060302	0.6776556776556776
389	1.0	0.0	1.0	1.0	1.0	0.9233766233766234	0.0766233766233766	1.0	0.9233766233766234	0.9601620526671168	0.9476398254660849	0.05236017453391506	0.5331412103746398	0.9296482412060302	0.6776556776556776
389	1.0	0.0	1.0	1.0	1.0	0.9233766233766234	0.0766233766233766	1.0	0.9233766233766234	0.9601620526671168	0.9476398254660849	0.05236017453391506	0.5331412103746398	0.9296482412060302	0.6776556776556776
389	1.0	0.0	1.0	1.0	1.0	0.9233766233766234	0.0766233766233766	1.0	0.9233766233766234	0.9601620526671168	0.9476398254660849	0.05236017453391506	0.5331412103746398	0.9296482412060302	0.6776556776556776
389	1.0	0.0	1.0	1.0	1.0	0.9233766233766234	0.0766233766233766	1.0	0.9233766233766234	0.9601620526671168	0.9476398254660849	0.05236017453391506	0.5331412103746398	0.9296482412060302	0.6776556776556776
389	1.0	0.0	1.0	1.0	1.0	0.9233766233766234	0.0766233766233766	1.0	0.9233766233766234	0.9601620526671168	0.9476398254660849	0.05236017453391506	0.5331412103746398	0.9296482412060302	0.6776556776556776
389	1.0	0.0	1.0	1.0	1.0	0.9233766233766234	0.0766233766233766	1.0	0.9233766233766234	0.9601620526671168	0.9476398254660849	0.05236017453391506	0.5331412103746398	0.9296482412060302	0.6776556776556776
389	1.0	0.0	1.0	1.0	1.0	0.9233766233766234	0.0766233766233766	1.0	0.9233766233766234	0.9601620526671168	0.9476398254660849	0.05236017453391506	0.5331412103746398	0.9296482412060302	0.6776556776556776
389	1.0	0.0	1.0	1.0	1.0	0.9233766233766234	0.0766233766233766	1.0	0.9233766233766234	0.9601620526671168	0.9476398254660849	0.05236017453391506	0.5331412103746398	0.9296482412060302	0.6776556776556776
389	1.0	0.0	1.0	1.0	1.0	0.9233766233766234	0.0766233766233766	1.0	0.9233766233766234	0.9601620526671168	0.9476398254660849	0.05236017453391506	0.5331412103746398	0.9296482412060302	0.6776556776556776
389	1.0	0.0	1.0	1.0	1.0	0.9233766233766234	0.0766233766233766	1.0	0.9233766233766234	0.9601620526671168	0.9476398254660849	0.05236017453391506	0.5331412103746398	0.9296482412060302	0.6776556776556776
389	1.0	0.0	1.0	1.0	1.0	0.9233766233766234	0.0766233766233766	1.0	0.9233766233766234	0.9601620526671168	0.9476398254660849	0.05236017453391506	0.5331412103746398	0.9296482412060302	0.6776556776556776
389	1.0	0.0	1.0	1.0	1.0	0.9233766233766234	0.0766233766233766	1.0	0.9233766233766234	0.9601620526671168	0.9476398254660849	0.05236017453391506	0.5331412103746398	0.9296482412060302	0.6776556776556776
389	1.0	0.0	1.0	1.0	1.0	0.9233766233766234	0.0766233766233766	1.0	0.9233766233766234	0.9601620526671168	0.9476398254660849	0.05236017453391506	0.5331412103746398	0.9296482412060302	0.6776556776556776
389	1.0	0.0	1.0	1.0	1.0	0.9233766233766234	0.0766233766233766	1.0	0.9233766233766234	0.9601620526671168	0.9476398254660849	0.05236017453391506	0.5331412103746398	0.9296482412060302	0.6776556776556776
389	1.0	0.0	1.0	1.0	1.0	0.9233766233766234	0.0766233766233766	1.0	0.9233766233766234	0.9601620526671168	0.9476398254660849	0.05236017453391506	0.5331412103746398	0.9296482412060302	0.6776556776556776
389	1.0	0.0	1.0	1.0	1.0	0.9233766233766234	0.0766233766233766	1.0	0.9233766233766234	0.9601620526671168	0.9476398254660849	0.05236017453391506	0.5331412103746398	0.9296482412060302	0.6776556776556776
389	1.0	0.0	1.0	1.0	1.0	0.9233766233766234	0.0766233766233766	1.0	0.9233766233766234	0.9601620526671168	0.9476398254660849	0.05236017453391506	0.5331412103746398	0.9296482412060302	0.6776556776556776
389	1.0	0.0	1.0	1.0	1.0	0.9233766233766234	0.0766233766233766	1.0	0.9233766233766234	0.9601620526671168	0.9476398254660849	0.05236017453391506	0.5331412103746398	0.9296482412060302	0.6776556776556776
389	1.0	0.0	1.0	1.0	1.0	0.9233766233766234	0.0766233766233766	1.0	0.9233766233766234	0.9601620526671168	0.9476398254660849	0.05236017453391506	0.5331412103746398	0.9296482412060302	0.6776556776556776
389	1.0	0.0	1.0	1.0	1.0	0.9233766233766234	0.0766233766233766	1.0	0.9233766233766234	0.9601620526671168	0.9476398254660849	0.05236017453391506	0.5331412103746398	0.9296482412060302	0.6776556776556776
389	1.0	0.0	1.0	1.0	1.0	0.9233766233766234	0.0766233766233766	1.0	0.9233766233766234	0.9601620526671168	0.9476398254660849	0.05236017453391506	0.5331412103746398	0.9296482412060302	0.6776556776556776
389	1.0	0.0	1.0	1.0	1.0	0.9233766233766234	0.0766233766233766	1.0	0.9233766233766234	0.9601620526671168	0.9476398254660849	0.05236017453391506	0.5331412103746398	0.9296482412060302	0.6776556776556776
389	1.0	0.0	1.0	1.0	1.0	0.9233766233766234	0.0766233766233766	1.0	0.9233766233766234	0.9601620526671168	0.9476398254660849	0.05236017453391506	0.5331412103746398	0.9296482412060302	0.6776556776556776
389	1.0	0.0	1.0	1.0	1.0	0.9233766233766234	0.0766233766233766	1.0	0.9233766233766234	0.9601620526671168	0.9476398254660849	0.05236017453391506	0.5331412103746398	0.9296482412060302	0.6776556776556776
389	1.0	0.0	1.0	1.0	1.0	0.9233766233766234	0.0766233766233766	1.0	0.9233766233766234	0.9601620526671168	0.9476398254660849	0.05236017453391506	0.5331412103746398	0.9296482412060302	0.6776556776556776
389	1.0	0.0	1.0	1.0	1.0	0.9233766233766234	0.0766233766233766	1.0	0.9233766233766234	0.9601620526671168	0.9476398254660849	0.05236017453391506	0.5331412103746398	0.9296482412060302	0.6776556776556776
389	1.0	0.0	1.0	1.0	1.0	0.9233766233766234	0.0766233766233766	1.0	0.9233766233766234	0.9601620526671168	0.9476398254660849	0.05236017453391506	0.5331412103746398	0.9296482412060302	0.6776556776556776
389	1.0	0.0	1.0	1.0	1.0	0.9233766233766234	0.0766233766233766	1.0	0.9233766233766234	0.9601620526671168	0.9476398254660849	0.05236017453391506	0.5331412103746398	0.9296482412060302	0.6776556776556776
389	1.0	0.0	1.0	1.0	1.0	0.9233766233766234	0.0766233766233766	1.0	0.9233766233766234	0.9601620526671168	0.9476398254660849	0.05236017453391506	0.5331412103746398	0.9296482412060302	0.6776556776556776
389	1.0	0.0	1.0	1.0	1.0	0.9233766233766234	0.0766233766233766	1.0	0.9233766233766234	0.9601620526671168	0.9476398254660849	0.05236017453391506	0.5331412103746398	0.9296482412060302	0.6776556776556776
389	1.0	0.0	1.0	1.0	1.0	0.9233766233766234	0.0766233766233766	1.0	0.9233766233766234	0.9601620526671168	0.9476398254660849	0.05236017453391506	0.5331412103746398	0.9296482412060302	0.6776556776556776
389	1.0	0.0	1.0	1.0	1.0	0.9233766233766234	0.0766233766233766	1.0	0.9233766233766234	0.9601620526671168	0.9476398254660849	0.05236017453391506	0.5331412103746398	0.9296482412060302	0.6776556776556776
389	1.0	0.0	1.0	1.0	1.0	0.9233766233766234	0.0766233766233766	1.0	0.9233766233766234	0.9601620526671168	0.9476398254660849	0.05236017453391506	0.5331412103746398	0.9296482412060302	0.6776556776556776
389	1.0	0.0	1.0	1.0	1.0	0.9233766233766234	0.0766233766233766	1.0	0.9233766233766234	0.9601620526671168	0.9476398254660849	0.05236017453391506	0.5331412103746398	0.9296482412060302	0.6776556776556776
389	1.0	0.0	1.0	1.0	1.0	0.9233766233766234	0.0766233766233766	1.0	0.9233766233766234	0.9601620526671168	0.9476398254660849	0.05236017453391506	0.5331412103746398	0.9296482412060302	0.6776556776556776
389	1.0	0.0	1.0	1.0	1.0	0.9233766233766234	0.0766233766233766	1.0	0.9233766233766234	0.9601620526671168	0.9476398254660849	0.05236017453391506	0.5331412103746398	0.9296482412060302	0.6776556776556776
389	1.0	0.0	1.0	1.0	1.0	0.9233766233766234	0.0766233766233766	1.0	0.9233766233766234	0.9601620526671168	0.9476398254660849	0.05236017453391506	0.5331412103746398	0.9296482412060302	0.6776556776556776
364	1.0	0.0	1.0	1.0	1.0	0.9247311827956989	0.07526881720430112	1.0	0.9242219215155616	0.960618846694796	0.9490603363006924	0.05093966369930758	0.5534531693472091	0.9315286624203821	0.6943620178041544
364	1.0	0.0	1.0	1.0	1.0	0.9247311827956989	0.07526881720430112	1.0	0.9242219215155616	0.960618846694796	0.9490603363006924	0.05093966369930758	0.5534531693472091	0.9315286624203821	0.6943620178041544
364	1.0	0.0	1.0	1.0	1.0	0.9247311827956989	0.07526881720430112	1.0	0.9242219215155616	0.960618846694796	0.9490603363006924	0.05093966369930758	0.5534531693472091	0.9315286624203821	0.6943620178041544
