# Supplementary material for: An Improved Hybrid Feature Selection Algorithm for Electric Charge Recovery Risk
Source: Hindawi journal article supplement (doi:10.1155/2020/8479341), 2020-08-28
Supplement: f1 [file 8479341.f1.zip › 8479341.f1/Experimental Results/201807/CBPSO_SBS_results.csv]

features_num	Accuracy_high	Loss_high	Precission_high	Recall_high	F1_high	Accuracy_med	Loss_med	Precission_med	Recall_med	F1_med	Accuracy_low	Loss_low	Precission_low	Recall_low	F1_low
387	1	0	1	1	1	0.834795322	0.165204678	0.998248687	0.835777126	0.909816441	0.968513234	0.031486766	0.716183575	0.874631268	0.7875166
386	1	0	1	1	1	0.834553441	0.165446559	0.998245614	0.835535977	0.909672262	0.96861163	0.03138837	0.716525935	0.876106195	0.788321168
386	1	0	1	1	1	0.834553441	0.165446559	0.998245614	0.835535977	0.909672262	0.96861163	0.03138837	0.716525935	0.876106195	0.788321168
386	1	0	1	1	1	0.834553441	0.165446559	0.998245614	0.835535977	0.909672262	0.96861163	0.03138837	0.716525935	0.876106195	0.788321168
386	1	0	1	1	1	0.834553441	0.165446559	0.998245614	0.835535977	0.909672262	0.96861163	0.03138837	0.716525935	0.876106195	0.788321168
385	1	0	1	1	1	0.83601757	0.16398243	0.998248687	0.837004405	0.910543131	0.968614719	0.031385281	0.718446602	0.871870398	0.787757818
385	1	0	1	1	1	0.83601757	0.16398243	0.998248687	0.837004405	0.910543131	0.968614719	0.031385281	0.718446602	0.871870398	0.787757818
385	1	0	1	1	1	0.83601757	0.16398243	0.998248687	0.837004405	0.910543131	0.968614719	0.031385281	0.718446602	0.871870398	0.787757818
385	1	0	1	1	1	0.83601757	0.16398243	0.998248687	0.837004405	0.910543131	0.968614719	0.031385281	0.718446602	0.871870398	0.787757818
384	1	0	1	1	1	0.837719298	0.162280702	0.998254799	0.838709677	0.911553785	0.968906819	0.031093181	0.719128329	0.876106195	0.789893617
384	1	0	1	1	1	0.837719298	0.162280702	0.998254799	0.838709677	0.911553785	0.968906819	0.031093181	0.719128329	0.876106195	0.789893617
384	1	0	1	1	1	0.837719298	0.162280702	0.998254799	0.838709677	0.911553785	0.968906819	0.031093181	0.719128329	0.876106195	0.789893617
384	1	0	1	1	1	0.837719298	0.162280702	0.998254799	0.838709677	0.911553785	0.968906819	0.031093181	0.719128329	0.876106195	0.789893617
384	1	0	1	1	1	0.837719298	0.162280702	0.998254799	0.838709677	0.911553785	0.968906819	0.031093181	0.719128329	0.876106195	0.789893617
384	1	0	1	1	1	0.837719298	0.162280702	0.998254799	0.838709677	0.911553785	0.968906819	0.031093181	0.719128329	0.876106195	0.789893617
384	1	0	1	1	1	0.837719298	0.162280702	0.998254799	0.838709677	0.911553785	0.968906819	0.031093181	0.719128329	0.876106195	0.789893617
384	1	0	1	1	1	0.837719298	0.162280702	0.998254799	0.838709677	0.911553785	0.968906819	0.031093181	0.719128329	0.876106195	0.789893617
384	1	0	1	1	1	0.837719298	0.162280702	0.998254799	0.838709677	0.911553785	0.968906819	0.031093181	0.719128329	0.876106195	0.789893617
384	1	0	1	1	1	0.837719298	0.162280702	0.998254799	0.838709677	0.911553785	0.968906819	0.031093181	0.719128329	0.876106195	0.789893617
384	1	0	1	1	1	0.837719298	0.162280702	0.998254799	0.838709677	0.911553785	0.968906819	0.031093181	0.719128329	0.876106195	0.789893617
384	1	0	1	1	1	0.837719298	0.162280702	0.998254799	0.838709677	0.911553785	0.968906819	0.031093181	0.719128329	0.876106195	0.789893617
384	1	0	1	1	1	0.837719298	0.162280702	0.998254799	0.838709677	0.911553785	0.968906819	0.031093181	0.719128329	0.876106195	0.789893617
384	1	0	1	1	1	0.837719298	0.162280702	0.998254799	0.838709677	0.911553785	0.968906819	0.031093181	0.719128329	0.876106195	0.789893617
384	1	0	1	1	1	0.837719298	0.162280702	0.998254799	0.838709677	0.911553785	0.968906819	0.031093181	0.719128329	0.876106195	0.789893617
384	1	0	1	1	1	0.837719298	0.162280702	0.998254799	0.838709677	0.911553785	0.968906819	0.031093181	0.719128329	0.876106195	0.789893617
384	1	0	1	1	1	0.837719298	0.162280702	0.998254799	0.838709677	0.911553785	0.968906819	0.031093181	0.719128329	0.876106195	0.789893617
384	1	0	1	1	1	0.837719298	0.162280702	0.998254799	0.838709677	0.911553785	0.968906819	0.031093181	0.719128329	0.876106195	0.789893617
384	1	0	1	1	1	0.837719298	0.162280702	0.998254799	0.838709677	0.911553785	0.968906819	0.031093181	0.719128329	0.876106195	0.789893617
384	1	0	1	1	1	0.837719298	0.162280702	0.998254799	0.838709677	0.911553785	0.968906819	0.031093181	0.719128329	0.876106195	0.789893617
384	1	0	1	1	1	0.837719298	0.162280702	0.998254799	0.838709677	0.911553785	0.968906819	0.031093181	0.719128329	0.876106195	0.789893617
384	1	0	1	1	1	0.837719298	0.162280702	0.998254799	0.838709677	0.911553785	0.968906819	0.031093181	0.719128329	0.876106195	0.789893617
384	1	0	1	1	1	0.837719298	0.162280702	0.998254799	0.838709677	0.911553785	0.968906819	0.031093181	0.719128329	0.876106195	0.789893617
384	1	0	1	1	1	0.837719298	0.162280702	0.998254799	0.838709677	0.911553785	0.968906819	0.031093181	0.719128329	0.876106195	0.789893617
384	1	0	1	1	1	0.837719298	0.162280702	0.998254799	0.838709677	0.911553785	0.968906819	0.031093181	0.719128329	0.876106195	0.789893617
384	1	0	1	1	1	0.837719298	0.162280702	0.998254799	0.838709677	0.911553785	0.968906819	0.031093181	0.719128329	0.876106195	0.789893617
384	1	0	1	1	1	0.837719298	0.162280702	0.998254799	0.838709677	0.911553785	0.968906819	0.031093181	0.719128329	0.876106195	0.789893617
384	1	0	1	1	1	0.837719298	0.162280702	0.998254799	0.838709677	0.911553785	0.968906819	0.031093181	0.719128329	0.876106195	0.789893617
384	1	0	1	1	1	0.837719298	0.162280702	0.998254799	0.838709677	0.911553785	0.968906819	0.031093181	0.719128329	0.876106195	0.789893617
384	1	0	1	1	1	0.837719298	0.162280702	0.998254799	0.838709677	0.911553785	0.968906819	0.031093181	0.719128329	0.876106195	0.789893617
384	1	0	1	1	1	0.837719298	0.162280702	0.998254799	0.838709677	0.911553785	0.968906819	0.031093181	0.719128329	0.876106195	0.789893617
384	1	0	1	1	1	0.837719298	0.162280702	0.998254799	0.838709677	0.911553785	0.968906819	0.031093181	0.719128329	0.876106195	0.789893617
384	1	0	1	1	1	0.837719298	0.162280702	0.998254799	0.838709677	0.911553785	0.968906819	0.031093181	0.719128329	0.876106195	0.789893617
384	1	0	1	1	1	0.837719298	0.162280702	0.998254799	0.838709677	0.911553785	0.968906819	0.031093181	0.719128329	0.876106195	0.789893617
384	1	0	1	1	1	0.837719298	0.162280702	0.998254799	0.838709677	0.911553785	0.968906819	0.031093181	0.719128329	0.876106195	0.789893617
384	1	0	1	1	1	0.837719298	0.162280702	0.998254799	0.838709677	0.911553785	0.968906819	0.031093181	0.719128329	0.876106195	0.789893617
384	1	0	1	1	1	0.837719298	0.162280702	0.998254799	0.838709677	0.911553785	0.968906819	0.031093181	0.719128329	0.876106195	0.789893617
384	1	0	1	1	1	0.837719298	0.162280702	0.998254799	0.838709677	0.911553785	0.968906819	0.031093181	0.719128329	0.876106195	0.789893617
384	1	0	1	1	1	0.837719298	0.162280702	0.998254799	0.838709677	0.911553785	0.968906819	0.031093181	0.719128329	0.876106195	0.789893617
383	1	0	1	1	1	0.843982169	0.156017831	0.998239437	0.845007452	0.915254237	0.969431885	0.030568115	0.730487805	0.869375907	0.793903247
383	1	0	1	1	1	0.843982169	0.156017831	0.998239437	0.845007452	0.915254237	0.969431885	0.030568115	0.730487805	0.869375907	0.793903247
383	1	0	1	1	1	0.843982169	0.156017831	0.998239437	0.845007452	0.915254237	0.969431885	0.030568115	0.730487805	0.869375907	0.793903247
383	1	0	1	1	1	0.843982169	0.156017831	0.998239437	0.845007452	0.915254237	0.969431885	0.030568115	0.730487805	0.869375907	0.793903247
383	1	0	1	1	1	0.843982169	0.156017831	0.998239437	0.845007452	0.915254237	0.969431885	0.030568115	0.730487805	0.869375907	0.793903247
383	1	0	1	1	1	0.843982169	0.156017831	0.998239437	0.845007452	0.915254237	0.969431885	0.030568115	0.730487805	0.869375907	0.793903247
383	1	0	1	1	1	0.843982169	0.156017831	0.998239437	0.845007452	0.915254237	0.969431885	0.030568115	0.730487805	0.869375907	0.793903247
383	1	0	1	1	1	0.843982169	0.156017831	0.998239437	0.845007452	0.915254237	0.969431885	0.030568115	0.730487805	0.869375907	0.793903247
383	1	0	1	1	1	0.843982169	0.156017831	0.998239437	0.845007452	0.915254237	0.969431885	0.030568115	0.730487805	0.869375907	0.793903247
383	1	0	1	1	1	0.843982169	0.156017831	0.998239437	0.845007452	0.915254237	0.969431885	0.030568115	0.730487805	0.869375907	0.793903247
383	1	0	1	1	1	0.843982169	0.156017831	0.998239437	0.845007452	0.915254237	0.969431885	0.030568115	0.730487805	0.869375907	0.793903247
383	1	0	1	1	1	0.843982169	0.156017831	0.998239437	0.845007452	0.915254237	0.969431885	0.030568115	0.730487805	0.869375907	0.793903247
383	1	0	1	1	1	0.843982169	0.156017831	0.998239437	0.845007452	0.915254237	0.969431885	0.030568115	0.730487805	0.869375907	0.793903247
383	1	0	1	1	1	0.843982169	0.156017831	0.998239437	0.845007452	0.915254237	0.969431885	0.030568115	0.730487805	0.869375907	0.793903247
383	1	0	1	1	1	0.843982169	0.156017831	0.998239437	0.845007452	0.915254237	0.969431885	0.030568115	0.730487805	0.869375907	0.793903247
383	1	0	1	1	1	0.843982169	0.156017831	0.998239437	0.845007452	0.915254237	0.969431885	0.030568115	0.730487805	0.869375907	0.793903247
383	1	0	1	1	1	0.843982169	0.156017831	0.998239437	0.845007452	0.915254237	0.969431885	0.030568115	0.730487805	0.869375907	0.793903247
383	1	0	1	1	1	0.843982169	0.156017831	0.998239437	0.845007452	0.915254237	0.969431885	0.030568115	0.730487805	0.869375907	0.793903247
383	1	0	1	1	1	0.843982169	0.156017831	0.998239437	0.845007452	0.915254237	0.969431885	0.030568115	0.730487805	0.869375907	0.793903247
383	1	0	1	1	1	0.843982169	0.156017831	0.998239437	0.845007452	0.915254237	0.969431885	0.030568115	0.730487805	0.869375907	0.793903247
383	1	0	1	1	1	0.843982169	0.156017831	0.998239437	0.845007452	0.915254237	0.969431885	0.030568115	0.730487805	0.869375907	0.793903247
383	1	0	1	1	1	0.843982169	0.156017831	0.998239437	0.845007452	0.915254237	0.969431885	0.030568115	0.730487805	0.869375907	0.793903247
383	1	0	1	1	1	0.843982169	0.156017831	0.998239437	0.845007452	0.915254237	0.969431885	0.030568115	0.730487805	0.869375907	0.793903247
383	1	0	1	1	1	0.843982169	0.156017831	0.998239437	0.845007452	0.915254237	0.969431885	0.030568115	0.730487805	0.869375907	0.793903247
383	1	0	1	1	1	0.843982169	0.156017831	0.998239437	0.845007452	0.915254237	0.969431885	0.030568115	0.730487805	0.869375907	0.793903247
383	1	0	1	1	1	0.843982169	0.156017831	0.998239437	0.845007452	0.915254237	0.969431885	0.030568115	0.730487805	0.869375907	0.793903247
383	1	0	1	1	1	0.843982169	0.156017831	0.998239437	0.845007452	0.915254237	0.969431885	0.030568115	0.730487805	0.869375907	0.793903247
383	1	0	1	1	1	0.843982169	0.156017831	0.998239437	0.845007452	0.915254237	0.969431885	0.030568115	0.730487805	0.869375907	0.793903247
383	1	0	1	1	1	0.843982169	0.156017831	0.998239437	0.845007452	0.915254237	0.969431885	0.030568115	0.730487805	0.869375907	0.793903247
383	1	0	1	1	1	0.843982169	0.156017831	0.998239437	0.845007452	0.915254237	0.969431885	0.030568115	0.730487805	0.869375907	0.793903247
383	1	0	1	1	1	0.843982169	0.156017831	0.998239437	0.845007452	0.915254237	0.969431885	0.030568115	0.730487805	0.869375907	0.793903247
383	1	0	1	1	1	0.843982169	0.156017831	0.998239437	0.845007452	0.915254237	0.969431885	0.030568115	0.730487805	0.869375907	0.793903247
383	1	0	1	1	1	0.843982169	0.156017831	0.998239437	0.845007452	0.915254237	0.969431885	0.030568115	0.730487805	0.869375907	0.793903247
383	1	0	1	1	1	0.843982169	0.156017831	0.998239437	0.845007452	0.915254237	0.969431885	0.030568115	0.730487805	0.869375907	0.793903247
383	1	0	1	1	1	0.843982169	0.156017831	0.998239437	0.845007452	0.915254237	0.969431885	0.030568115	0.730487805	0.869375907	0.793903247
383	1	0	1	1	1	0.843982169	0.156017831	0.998239437	0.845007452	0.915254237	0.969431885	0.030568115	0.730487805	0.869375907	0.793903247
383	1	0	1	1	1	0.843982169	0.156017831	0.998239437	0.845007452	0.915254237	0.969431885	0.030568115	0.730487805	0.869375907	0.793903247
383	1	0	1	1	1	0.843982169	0.156017831	0.998239437	0.845007452	0.915254237	0.969431885	0.030568115	0.730487805	0.869375907	0.793903247
382	1	0	1	1	1	0.843982169	0.156017831	0.998239437	0.845007452	0.915254237	0.969628465	0.030371535	0.732273839	0.869375907	0.794956868
382	1	0	1	1	1	0.843982169	0.156017831	0.998239437	0.845007452	0.915254237	0.969628465	0.030371535	0.732273839	0.869375907	0.794956868
382	1	0	1	1	1	0.843982169	0.156017831	0.998239437	0.845007452	0.915254237	0.969628465	0.030371535	0.732273839	0.869375907	0.794956868
382	1	0	1	1	1	0.843982169	0.156017831	0.998239437	0.845007452	0.915254237	0.969628465	0.030371535	0.732273839	0.869375907	0.794956868
382	1	0	1	1	1	0.843982169	0.156017831	0.998239437	0.845007452	0.915254237	0.969628465	0.030371535	0.732273839	0.869375907	0.794956868
382	1	0	1	1	1	0.843982169	0.156017831	0.998239437	0.845007452	0.915254237	0.969628465	0.030371535	0.732273839	0.869375907	0.794956868
382	1	0	1	1	1	0.843982169	0.156017831	0.998239437	0.845007452	0.915254237	0.969628465	0.030371535	0.732273839	0.869375907	0.794956868
382	1	0	1	1	1	0.843982169	0.156017831	0.998239437	0.845007452	0.915254237	0.969628465	0.030371535	0.732273839	0.869375907	0.794956868
382	1	0	1	1	1	0.843982169	0.156017831	0.998239437	0.845007452	0.915254237	0.969628465	0.030371535	0.732273839	0.869375907	0.794956868
382	1	0	1	1	1	0.843982169	0.156017831	0.998239437	0.845007452	0.915254237	0.969628465	0.030371535	0.732273839	0.869375907	0.794956868
382	1	0	1	1	1	0.843982169	0.156017831	0.998239437	0.845007452	0.915254237	0.969628465	0.030371535	0.732273839	0.869375907	0.794956868
382	1	0	1	1	1	0.843982169	0.156017831	0.998239437	0.845007452	0.915254237	0.969628465	0.030371535	0.732273839	0.869375907	0.794956868
382	1	0	1	1	1	0.843982169	0.156017831	0.998239437	0.845007452	0.915254237	0.969628465	0.030371535	0.732273839	0.869375907	0.794956868
382	1	0	1	1	1	0.843982169	0.156017831	0.998239437	0.845007452	0.915254237	0.969628465	0.030371535	0.732273839	0.869375907	0.794956868
382	1	0	1	1	1	0.843982169	0.156017831	0.998239437	0.845007452	0.915254237	0.969628465	0.030371535	0.732273839	0.869375907	0.794956868
382	1	0	1	1	1	0.843982169	0.156017831	0.998239437	0.845007452	0.915254237	0.969628465	0.030371535	0.732273839	0.869375907	0.794956868
382	1	0	1	1	1	0.843982169	0.156017831	0.998239437	0.845007452	0.915254237	0.969628465	0.030371535	0.732273839	0.869375907	0.794956868
382	1	0	1	1	1	0.843982169	0.156017831	0.998239437	0.845007452	0.915254237	0.969628465	0.030371535	0.732273839	0.869375907	0.794956868
382	1	0	1	1	1	0.843982169	0.156017831	0.998239437	0.845007452	0.915254237	0.969628465	0.030371535	0.732273839	0.869375907	0.794956868
382	1	0	1	1	1	0.843982169	0.156017831	0.998239437	0.845007452	0.915254237	0.969628465	0.030371535	0.732273839	0.869375907	0.794956868
382	1	0	1	1	1	0.843982169	0.156017831	0.998239437	0.845007452	0.915254237	0.969628465	0.030371535	0.732273839	0.869375907	0.794956868
382	1	0	1	1	1	0.843982169	0.156017831	0.998239437	0.845007452	0.915254237	0.969628465	0.030371535	0.732273839	0.869375907	0.794956868
382	1	0	1	1	1	0.843982169	0.156017831	0.998239437	0.845007452	0.915254237	0.969628465	0.030371535	0.732273839	0.869375907	0.794956868
382	1	0	1	1	1	0.843982169	0.156017831	0.998239437	0.845007452	0.915254237	0.969628465	0.030371535	0.732273839	0.869375907	0.794956868
382	1	0	1	1	1	0.843982169	0.156017831	0.998239437	0.845007452	0.915254237	0.969628465	0.030371535	0.732273839	0.869375907	0.794956868
382	1	0	1	1	1	0.843982169	0.156017831	0.998239437	0.845007452	0.915254237	0.969628465	0.030371535	0.732273839	0.869375907	0.794956868
382	1	0	1	1	1	0.843982169	0.156017831	0.998239437	0.845007452	0.915254237	0.969628465	0.030371535	0.732273839	0.869375907	0.794956868
382	1	0	1	1	1	0.843982169	0.156017831	0.998239437	0.845007452	0.915254237	0.969628465	0.030371535	0.732273839	0.869375907	0.794956868
382	1	0	1	1	1	0.843982169	0.156017831	0.998239437	0.845007452	0.915254237	0.969628465	0.030371535	0.732273839	0.869375907	0.794956868
382	1	0	1	1	1	0.843982169	0.156017831	0.998239437	0.845007452	0.915254237	0.969628465	0.030371535	0.732273839	0.869375907	0.794956868
382	1	0	1	1	1	0.843982169	0.156017831	0.998239437	0.845007452	0.915254237	0.969628465	0.030371535	0.732273839	0.869375907	0.794956868
382	1	0	1	1	1	0.843982169	0.156017831	0.998239437	0.845007452	0.915254237	0.969628465	0.030371535	0.732273839	0.869375907	0.794956868
382	1	0	1	1	1	0.843982169	0.156017831	0.998239437	0.845007452	0.915254237	0.969628465	0.030371535	0.732273839	0.869375907	0.794956868
382	1	0	1	1	1	0.843982169	0.156017831	0.998239437	0.845007452	0.915254237	0.969628465	0.030371535	0.732273839	0.869375907	0.794956868
382	1	0	1	1	1	0.843982169	0.156017831	0.998239437	0.845007452	0.915254237	0.969628465	0.030371535	0.732273839	0.869375907	0.794956868
382	1	0	1	1	1	0.843982169	0.156017831	0.998239437	0.845007452	0.915254237	0.969628465	0.030371535	0.732273839	0.869375907	0.794956868
382	1	0	1	1	1	0.843982169	0.156017831	0.998239437	0.845007452	0.915254237	0.969628465	0.030371535	0.732273839	0.869375907	0.794956868
382	1	0	1	1	1	0.843982169	0.156017831	0.998239437	0.845007452	0.915254237	0.969628465	0.030371535	0.732273839	0.869375907	0.794956868
382	1	0	1	1	1	0.843982169	0.156017831	0.998239437	0.845007452	0.915254237	0.969628465	0.030371535	0.732273839	0.869375907	0.794956868
382	1	0	1	1	1	0.843982169	0.156017831	0.998239437	0.845007452	0.915254237	0.969628465	0.030371535	0.732273839	0.869375907	0.794956868
382	1	0	1	1	1	0.843982169	0.156017831	0.998239437	0.845007452	0.915254237	0.969628465	0.030371535	0.732273839	0.869375907	0.794956868
382	1	0	1	1	1	0.843982169	0.156017831	0.998239437	0.845007452	0.915254237	0.969628465	0.030371535	0.732273839	0.869375907	0.794956868
382	1	0	1	1	1	0.843982169	0.156017831	0.998239437	0.845007452	0.915254237	0.969628465	0.030371535	0.732273839	0.869375907	0.794956868
382	1	0	1	1	1	0.843982169	0.156017831	0.998239437	0.845007452	0.915254237	0.969628465	0.030371535	0.732273839	0.869375907	0.794956868
382	1	0	1	1	1	0.843982169	0.156017831	0.998239437	0.845007452	0.915254237	0.969628465	0.030371535	0.732273839	0.869375907	0.794956868
382	1	0	1	1	1	0.843982169	0.156017831	0.998239437	0.845007452	0.915254237	0.969628465	0.030371535	0.732273839	0.869375907	0.794956868
382	1	0	1	1	1	0.843982169	0.156017831	0.998239437	0.845007452	0.915254237	0.969628465	0.030371535	0.732273839	0.869375907	0.794956868
382	1	0	1	1	1	0.843982169	0.156017831	0.998239437	0.845007452	0.915254237	0.969628465	0.030371535	0.732273839	0.869375907	0.794956868
382	1	0	1	1	1	0.843982169	0.156017831	0.998239437	0.845007452	0.915254237	0.969628465	0.030371535	0.732273839	0.869375907	0.794956868
382	1	0	1	1	1	0.843982169	0.156017831	0.998239437	0.845007452	0.915254237	0.969628465	0.030371535	0.732273839	0.869375907	0.794956868
382	1	0	1	1	1	0.843982169	0.156017831	0.998239437	0.845007452	0.915254237	0.969628465	0.030371535	0.732273839	0.869375907	0.794956868
382	1	0	1	1	1	0.843982169	0.156017831	0.998239437	0.845007452	0.915254237	0.969628465	0.030371535	0.732273839	0.869375907	0.794956868
382	1	0	1	1	1	0.843982169	0.156017831	0.998239437	0.845007452	0.915254237	0.969628465	0.030371535	0.732273839	0.869375907	0.794956868
382	1	0	1	1	1	0.843982169	0.156017831	0.998239437	0.845007452	0.915254237	0.969628465	0.030371535	0.732273839	0.869375907	0.794956868
382	1	0	1	1	1	0.843982169	0.156017831	0.998239437	0.845007452	0.915254237	0.969628465	0.030371535	0.732273839	0.869375907	0.794956868
382	1	0	1	1	1	0.843982169	0.156017831	0.998239437	0.845007452	0.915254237	0.969628465	0.030371535	0.732273839	0.869375907	0.794956868
382	1	0	1	1	1	0.843982169	0.156017831	0.998239437	0.845007452	0.915254237	0.969628465	0.030371535	0.732273839	0.869375907	0.794956868
382	1	0	1	1	1	0.843982169	0.156017831	0.998239437	0.845007452	0.915254237	0.969628465	0.030371535	0.732273839	0.869375907	0.794956868
382	1	0	1	1	1	0.843982169	0.156017831	0.998239437	0.845007452	0.915254237	0.969628465	0.030371535	0.732273839	0.869375907	0.794956868
382	1	0	1	1	1	0.843982169	0.156017831	0.998239437	0.845007452	0.915254237	0.969628465	0.030371535	0.732273839	0.869375907	0.794956868
382	1	0	1	1	1	0.843982169	0.156017831	0.998239437	0.845007452	0.915254237	0.969628465	0.030371535	0.732273839	0.869375907	0.794956868
382	1	0	1	1	1	0.843982169	0.156017831	0.998239437	0.845007452	0.915254237	0.969628465	0.030371535	0.732273839	0.869375907	0.794956868
382	1	0	1	1	1	0.843982169	0.156017831	0.998239437	0.845007452	0.915254237	0.969628465	0.030371535	0.732273839	0.869375907	0.794956868
382	1	0	1	1	1	0.843982169	0.156017831	0.998239437	0.845007452	0.915254237	0.969628465	0.030371535	0.732273839	0.869375907	0.794956868
382	1	0	1	1	1	0.843982169	0.156017831	0.998239437	0.845007452	0.915254237	0.969628465	0.030371535	0.732273839	0.869375907	0.794956868
382	1	0	1	1	1	0.843982169	0.156017831	0.998239437	0.845007452	0.915254237	0.969628465	0.030371535	0.732273839	0.869375907	0.794956868
382	1	0	1	1	1	0.843982169	0.156017831	0.998239437	0.845007452	0.915254237	0.969628465	0.030371535	0.732273839	0.869375907	0.794956868
382	1	0	1	1	1	0.843982169	0.156017831	0.998239437	0.845007452	0.915254237	0.969628465	0.030371535	0.732273839	0.869375907	0.794956868
382	1	0	1	1	1	0.843982169	0.156017831	0.998239437	0.845007452	0.915254237	0.969628465	0.030371535	0.732273839	0.869375907	0.794956868
382	1	0	1	1	1	0.843982169	0.156017831	0.998239437	0.845007452	0.915254237	0.969628465	0.030371535	0.732273839	0.869375907	0.794956868
382	1	0	1	1	1	0.843982169	0.156017831	0.998239437	0.845007452	0.915254237	0.969628465	0.030371535	0.732273839	0.869375907	0.794956868
382	1	0	1	1	1	0.843982169	0.156017831	0.998239437	0.845007452	0.915254237	0.969628465	0.030371535	0.732273839	0.869375907	0.794956868
382	1	0	1	1	1	0.843982169	0.156017831	0.998239437	0.845007452	0.915254237	0.969628465	0.030371535	0.732273839	0.869375907	0.794956868
382	1	0	1	1	1	0.843982169	0.156017831	0.998239437	0.845007452	0.915254237	0.969628465	0.030371535	0.732273839	0.869375907	0.794956868
382	1	0	1	1	1	0.843982169	0.156017831	0.998239437	0.845007452	0.915254237	0.969628465	0.030371535	0.732273839	0.869375907	0.794956868
382	1	0	1	1	1	0.843982169	0.156017831	0.998239437	0.845007452	0.915254237	0.969628465	0.030371535	0.732273839	0.869375907	0.794956868
382	1	0	1	1	1	0.843982169	0.156017831	0.998239437	0.845007452	0.915254237	0.969628465	0.030371535	0.732273839	0.869375907	0.794956868
382	1	0	1	1	1	0.843982169	0.156017831	0.998239437	0.845007452	0.915254237	0.969628465	0.030371535	0.732273839	0.869375907	0.794956868
382	1	0	1	1	1	0.843982169	0.156017831	0.998239437	0.845007452	0.915254237	0.969628465	0.030371535	0.732273839	0.869375907	0.794956868
382	1	0	1	1	1	0.843982169	0.156017831	0.998239437	0.845007452	0.915254237	0.969628465	0.030371535	0.732273839	0.869375907	0.794956868
382	1	0	1	1	1	0.843982169	0.156017831	0.998239437	0.845007452	0.915254237	0.969628465	0.030371535	0.732273839	0.869375907	0.794956868
382	1	0	1	1	1	0.843982169	0.156017831	0.998239437	0.845007452	0.915254237	0.969628465	0.030371535	0.732273839	0.869375907	0.794956868
382	1	0	1	1	1	0.843982169	0.156017831	0.998239437	0.845007452	0.915254237	0.969628465	0.030371535	0.732273839	0.869375907	0.794956868
382	1	0	1	1	1	0.843982169	0.156017831	0.998239437	0.845007452	0.915254237	0.969628465	0.030371535	0.732273839	0.869375907	0.794956868
382	1	0	1	1	1	0.843982169	0.156017831	0.998239437	0.845007452	0.915254237	0.969628465	0.030371535	0.732273839	0.869375907	0.794956868
382	1	0	1	1	1	0.843982169	0.156017831	0.998239437	0.845007452	0.915254237	0.969628465	0.030371535	0.732273839	0.869375907	0.794956868
382	1	0	1	1	1	0.843982169	0.156017831	0.998239437	0.845007452	0.915254237	0.969628465	0.030371535	0.732273839	0.869375907	0.794956868
382	1	0	1	1	1	0.843982169	0.156017831	0.998239437	0.845007452	0.915254237	0.969628465	0.030371535	0.732273839	0.869375907	0.794956868
382	1	0	1	1	1	0.843982169	0.156017831	0.998239437	0.845007452	0.915254237	0.969628465	0.030371535	0.732273839	0.869375907	0.794956868
382	1	0	1	1	1	0.843982169	0.156017831	0.998239437	0.845007452	0.915254237	0.969628465	0.030371535	0.732273839	0.869375907	0.794956868
382	1	0	1	1	1	0.843982169	0.156017831	0.998239437	0.845007452	0.915254237	0.969628465	0.030371535	0.732273839	0.869375907	0.794956868
382	1	0	1	1	1	0.843982169	0.156017831	0.998239437	0.845007452	0.915254237	0.969628465	0.030371535	0.732273839	0.869375907	0.794956868
382	1	0	1	1	1	0.843982169	0.156017831	0.998239437	0.845007452	0.915254237	0.969628465	0.030371535	0.732273839	0.869375907	0.794956868
382	1	0	1	1	1	0.843982169	0.156017831	0.998239437	0.845007452	0.915254237	0.969628465	0.030371535	0.732273839	0.869375907	0.794956868
382	1	0	1	1	1	0.843982169	0.156017831	0.998239437	0.845007452	0.915254237	0.969628465	0.030371535	0.732273839	0.869375907	0.794956868
382	1	0	1	1	1	0.843982169	0.156017831	0.998239437	0.845007452	0.915254237	0.969628465	0.030371535	0.732273839	0.869375907	0.794956868
382	1	0	1	1	1	0.843982169	0.156017831	0.998239437	0.845007452	0.915254237	0.969628465	0.030371535	0.732273839	0.869375907	0.794956868
382	1	0	1	1	1	0.843982169	0.156017831	0.998239437	0.845007452	0.915254237	0.969628465	0.030371535	0.732273839	0.869375907	0.794956868
382	1	0	1	1	1	0.843982169	0.156017831	0.998239437	0.845007452	0.915254237	0.969628465	0.030371535	0.732273839	0.869375907	0.794956868
382	1	0	1	1	1	0.843982169	0.156017831	0.998239437	0.845007452	0.915254237	0.969628465	0.030371535	0.732273839	0.869375907	0.794956868
382	1	0	1	1	1	0.843982169	0.156017831	0.998239437	0.845007452	0.915254237	0.969628465	0.030371535	0.732273839	0.869375907	0.794956868
382	1	0	1	1	1	0.843982169	0.156017831	0.998239437	0.845007452	0.915254237	0.969628465	0.030371535	0.732273839	0.869375907	0.794956868
382	1	0	1	1	1	0.843982169	0.156017831	0.998239437	0.845007452	0.915254237	0.969628465	0.030371535	0.732273839	0.869375907	0.794956868
381	1	0	1	1	1	0.845468053	0.154531947	0.998242531	0.846497765	0.916129032	0.969628465	0.030371535	0.732273839	0.869375907	0.794956868
381	1	0	1	1	1	0.845468053	0.154531947	0.998242531	0.846497765	0.916129032	0.969628465	0.030371535	0.732273839	0.869375907	0.794956868
381	1	0	1	1	1	0.845468053	0.154531947	0.998242531	0.846497765	0.916129032	0.969628465	0.030371535	0.732273839	0.869375907	0.794956868
381	1	0	1	1	1	0.845468053	0.154531947	0.998242531	0.846497765	0.916129032	0.969628465	0.030371535	0.732273839	0.869375907	0.794956868
381	1	0	1	1	1	0.845468053	0.154531947	0.998242531	0.846497765	0.916129032	0.969628465	0.030371535	0.732273839	0.869375907	0.794956868
381	1	0	1	1	1	0.845468053	0.154531947	0.998242531	0.846497765	0.916129032	0.969628465	0.030371535	0.732273839	0.869375907	0.794956868
381	1	0	1	1	1	0.845468053	0.154531947	0.998242531	0.846497765	0.916129032	0.969628465	0.030371535	0.732273839	0.869375907	0.794956868
381	1	0	1	1	1	0.845468053	0.154531947	0.998242531	0.846497765	0.916129032	0.969628465	0.030371535	0.732273839	0.869375907	0.794956868
381	1	0	1	1	1	0.845468053	0.154531947	0.998242531	0.846497765	0.916129032	0.969628465	0.030371535	0.732273839	0.869375907	0.794956868
381	1	0	1	1	1	0.845468053	0.154531947	0.998242531	0.846497765	0.916129032	0.969628465	0.030371535	0.732273839	0.869375907	0.794956868
381	1	0	1	1	1	0.845468053	0.154531947	0.998242531	0.846497765	0.916129032	0.969628465	0.030371535	0.732273839	0.869375907	0.794956868
381	1	0	1	1	1	0.845468053	0.154531947	0.998242531	0.846497765	0.916129032	0.969628465	0.030371535	0.732273839	0.869375907	0.794956868
381	1	0	1	1	1	0.845468053	0.154531947	0.998242531	0.846497765	0.916129032	0.969628465	0.030371535	0.732273839	0.869375907	0.794956868
381	1	0	1	1	1	0.845468053	0.154531947	0.998242531	0.846497765	0.916129032	0.969628465	0.030371535	0.732273839	0.869375907	0.794956868
381	1	0	1	1	1	0.845468053	0.154531947	0.998242531	0.846497765	0.916129032	0.969628465	0.030371535	0.732273839	0.869375907	0.794956868
381	1	0	1	1	1	0.845468053	0.154531947	0.998242531	0.846497765	0.916129032	0.969628465	0.030371535	0.732273839	0.869375907	0.794956868
381	1	0	1	1	1	0.845468053	0.154531947	0.998242531	0.846497765	0.916129032	0.969628465	0.030371535	0.732273839	0.869375907	0.794956868
381	1	0	1	1	1	0.845468053	0.154531947	0.998242531	0.846497765	0.916129032	0.969628465	0.030371535	0.732273839	0.869375907	0.794956868
381	1	0	1	1	1	0.845468053	0.154531947	0.998242531	0.846497765	0.916129032	0.969628465	0.030371535	0.732273839	0.869375907	0.794956868
381	1	0	1	1	1	0.845468053	0.154531947	0.998242531	0.846497765	0.916129032	0.969628465	0.030371535	0.732273839	0.869375907	0.794956868
381	1	0	1	1	1	0.845468053	0.154531947	0.998242531	0.846497765	0.916129032	0.969628465	0.030371535	0.732273839	0.869375907	0.794956868
381	1	0	1	1	1	0.845468053	0.154531947	0.998242531	0.846497765	0.916129032	0.969628465	0.030371535	0.732273839	0.869375907	0.794956868
381	1	0	1	1	1	0.845468053	0.154531947	0.998242531	0.846497765	0.916129032	0.969628465	0.030371535	0.732273839	0.869375907	0.794956868
381	1	0	1	1	1	0.845468053	0.154531947	0.998242531	0.846497765	0.916129032	0.969628465	0.030371535	0.732273839	0.869375907	0.794956868
381	1	0	1	1	1	0.845468053	0.154531947	0.998242531	0.846497765	0.916129032	0.969628465	0.030371535	0.732273839	0.869375907	0.794956868
381	1	0	1	1	1	0.845468053	0.154531947	0.998242531	0.846497765	0.916129032	0.969628465	0.030371535	0.732273839	0.869375907	0.794956868
381	1	0	1	1	1	0.845468053	0.154531947	0.998242531	0.846497765	0.916129032	0.969628465	0.030371535	0.732273839	0.869375907	0.794956868
381	1	0	1	1	1	0.845468053	0.154531947	0.998242531	0.846497765	0.916129032	0.969628465	0.030371535	0.732273839	0.869375907	0.794956868
381	1	0	1	1	1	0.845468053	0.154531947	0.998242531	0.846497765	0.916129032	0.969628465	0.030371535	0.732273839	0.869375907	0.794956868
381	1	0	1	1	1	0.845468053	0.154531947	0.998242531	0.846497765	0.916129032	0.969628465	0.030371535	0.732273839	0.869375907	0.794956868
381	1	0	1	1	1	0.845468053	0.154531947	0.998242531	0.846497765	0.916129032	0.969628465	0.030371535	0.732273839	0.869375907	0.794956868
381	1	0	1	1	1	0.845468053	0.154531947	0.998242531	0.846497765	0.916129032	0.969628465	0.030371535	0.732273839	0.869375907	0.794956868
381	1	0	1	1	1	0.845468053	0.154531947	0.998242531	0.846497765	0.916129032	0.969628465	0.030371535	0.732273839	0.869375907	0.794956868
381	1	0	1	1	1	0.845468053	0.154531947	0.998242531	0.846497765	0.916129032	0.969628465	0.030371535	0.732273839	0.869375907	0.794956868
381	1	0	1	1	1	0.845468053	0.154531947	0.998242531	0.846497765	0.916129032	0.969628465	0.030371535	0.732273839	0.869375907	0.794956868
381	1	0	1	1	1	0.845468053	0.154531947	0.998242531	0.846497765	0.916129032	0.969628465	0.030371535	0.732273839	0.869375907	0.794956868
381	1	0	1	1	1	0.845468053	0.154531947	0.998242531	0.846497765	0.916129032	0.969628465	0.030371535	0.732273839	0.869375907	0.794956868
381	1	0	1	1	1	0.845468053	0.154531947	0.998242531	0.846497765	0.916129032	0.969628465	0.030371535	0.732273839	0.869375907	0.794956868
381	1	0	1	1	1	0.845468053	0.154531947	0.998242531	0.846497765	0.916129032	0.969628465	0.030371535	0.732273839	0.869375907	0.794956868
381	1	0	1	1	1	0.845468053	0.154531947	0.998242531	0.846497765	0.916129032	0.969628465	0.030371535	0.732273839	0.869375907	0.794956868
381	1	0	1	1	1	0.845468053	0.154531947	0.998242531	0.846497765	0.916129032	0.969628465	0.030371535	0.732273839	0.869375907	0.794956868
381	1	0	1	1	1	0.845468053	0.154531947	0.998242531	0.846497765	0.916129032	0.969628465	0.030371535	0.732273839	0.869375907	0.794956868
381	1	0	1	1	1	0.845468053	0.154531947	0.998242531	0.846497765	0.916129032	0.969628465	0.030371535	0.732273839	0.869375907	0.794956868
381	1	0	1	1	1	0.845468053	0.154531947	0.998242531	0.846497765	0.916129032	0.969628465	0.030371535	0.732273839	0.869375907	0.794956868
381	1	0	1	1	1	0.845468053	0.154531947	0.998242531	0.846497765	0.916129032	0.969628465	0.030371535	0.732273839	0.869375907	0.794956868
380	1	0	1	1	1	0.846497765	0.153502235	0.998239437	0.847533632	0.916734034	0.969536164	0.030463836	0.732034105	0.86975398	0.794973545
380	1	0	1	1	1	0.846497765	0.153502235	0.998239437	0.847533632	0.916734034	0.969536164	0.030463836	0.732034105	0.86975398	0.794973545
380	1	0	1	1	1	0.846497765	0.153502235	0.998239437	0.847533632	0.916734034	0.969536164	0.030463836	0.732034105	0.86975398	0.794973545
380	1	0	1	1	1	0.846497765	0.153502235	0.998239437	0.847533632	0.916734034	0.969536164	0.030463836	0.732034105	0.86975398	0.794973545
380	1	0	1	1	1	0.846497765	0.153502235	0.998239437	0.847533632	0.916734034	0.969536164	0.030463836	0.732034105	0.86975398	0.794973545
380	1	0	1	1	1	0.846497765	0.153502235	0.998239437	0.847533632	0.916734034	0.969536164	0.030463836	0.732034105	0.86975398	0.794973545
380	1	0	1	1	1	0.846497765	0.153502235	0.998239437	0.847533632	0.916734034	0.969536164	0.030463836	0.732034105	0.86975398	0.794973545
380	1	0	1	1	1	0.846497765	0.153502235	0.998239437	0.847533632	0.916734034	0.969536164	0.030463836	0.732034105	0.86975398	0.794973545
380	1	0	1	1	1	0.846497765	0.153502235	0.998239437	0.847533632	0.916734034	0.969536164	0.030463836	0.732034105	0.86975398	0.794973545
380	1	0	1	1	1	0.846497765	0.153502235	0.998239437	0.847533632	0.916734034	0.969536164	0.030463836	0.732034105	0.86975398	0.794973545
380	1	0	1	1	1	0.846497765	0.153502235	0.998239437	0.847533632	0.916734034	0.969536164	0.030463836	0.732034105	0.86975398	0.794973545
380	1	0	1	1	1	0.846497765	0.153502235	0.998239437	0.847533632	0.916734034	0.969536164	0.030463836	0.732034105	0.86975398	0.794973545
380	1	0	1	1	1	0.846497765	0.153502235	0.998239437	0.847533632	0.916734034	0.969536164	0.030463836	0.732034105	0.86975398	0.794973545
380	1	0	1	1	1	0.846497765	0.153502235	0.998239437	0.847533632	0.916734034	0.969536164	0.030463836	0.732034105	0.86975398	0.794973545
380	1	0	1	1	1	0.846497765	0.153502235	0.998239437	0.847533632	0.916734034	0.969536164	0.030463836	0.732034105	0.86975398	0.794973545
380	1	0	1	1	1	0.846497765	0.153502235	0.998239437	0.847533632	0.916734034	0.969536164	0.030463836	0.732034105	0.86975398	0.794973545
380	1	0	1	1	1	0.846497765	0.153502235	0.998239437	0.847533632	0.916734034	0.969536164	0.030463836	0.732034105	0.86975398	0.794973545
380	1	0	1	1	1	0.846497765	0.153502235	0.998239437	0.847533632	0.916734034	0.969536164	0.030463836	0.732034105	0.86975398	0.794973545
380	1	0	1	1	1	0.846497765	0.153502235	0.998239437	0.847533632	0.916734034	0.969536164	0.030463836	0.732034105	0.86975398	0.794973545
380	1	0	1	1	1	0.846497765	0.153502235	0.998239437	0.847533632	0.916734034	0.969536164	0.030463836	0.732034105	0.86975398	0.794973545
380	1	0	1	1	1	0.846497765	0.153502235	0.998239437	0.847533632	0.916734034	0.969536164	0.030463836	0.732034105	0.86975398	0.794973545
380	1	0	1	1	1	0.846497765	0.153502235	0.998239437	0.847533632	0.916734034	0.969536164	0.030463836	0.732034105	0.86975398	0.794973545
380	1	0	1	1	1	0.846497765	0.153502235	0.998239437	0.847533632	0.916734034	0.969536164	0.030463836	0.732034105	0.86975398	0.794973545
380	1	0	1	1	1	0.846497765	0.153502235	0.998239437	0.847533632	0.916734034	0.969536164	0.030463836	0.732034105	0.86975398	0.794973545
380	1	0	1	1	1	0.846497765	0.153502235	0.998239437	0.847533632	0.916734034	0.969536164	0.030463836	0.732034105	0.86975398	0.794973545
380	1	0	1	1	1	0.846497765	0.153502235	0.998239437	0.847533632	0.916734034	0.969536164	0.030463836	0.732034105	0.86975398	0.794973545
380	1	0	1	1	1	0.846497765	0.153502235	0.998239437	0.847533632	0.916734034	0.969536164	0.030463836	0.732034105	0.86975398	0.794973545
380	1	0	1	1	1	0.846497765	0.153502235	0.998239437	0.847533632	0.916734034	0.969536164	0.030463836	0.732034105	0.86975398	0.794973545
380	1	0	1	1	1	0.846497765	0.153502235	0.998239437	0.847533632	0.916734034	0.969536164	0.030463836	0.732034105	0.86975398	0.794973545
380	1	0	1	1	1	0.846497765	0.153502235	0.998239437	0.847533632	0.916734034	0.969536164	0.030463836	0.732034105	0.86975398	0.794973545
380	1	0	1	1	1	0.846497765	0.153502235	0.998239437	0.847533632	0.916734034	0.969536164	0.030463836	0.732034105	0.86975398	0.794973545
380	1	0	1	1	1	0.846497765	0.153502235	0.998239437	0.847533632	0.916734034	0.969536164	0.030463836	0.732034105	0.86975398	0.794973545
380	1	0	1	1	1	0.846497765	0.153502235	0.998239437	0.847533632	0.916734034	0.969536164	0.030463836	0.732034105	0.86975398	0.794973545
380	1	0	1	1	1	0.846497765	0.153502235	0.998239437	0.847533632	0.916734034	0.969536164	0.030463836	0.732034105	0.86975398	0.794973545
380	1	0	1	1	1	0.846497765	0.153502235	0.998239437	0.847533632	0.916734034	0.969536164	0.030463836	0.732034105	0.86975398	0.794973545
379	1	0	1	1	1	0.845092025	0.154907975	1	0.844615385	0.915763136	0.970383446	0.029616554	0.746394231	0.872191011	0.804404145
378	1	0	1	1	1	0.850308642	0.149691358	0.998185118	0.851393189	0.918964077	0.970294118	0.029705882	0.744655582	0.876923077	0.80539499
377	1	0	1	1	1	0.8048	0.1952	1	0.804487179	0.891651865	0.979174814	0.020825186	0.847568988	0.869272237	0.858283433
376	1	0	1	1	1	0.81098546	0.18901454	1	0.810679612	0.895442359	0.979187024	0.020812976	0.848761408	0.870320856	0.859405941
376	1	0	1	1	1	0.81098546	0.18901454	1	0.810679612	0.895442359	0.979187024	0.020812976	0.848761408	0.870320856	0.859405941
376	1	0	1	1	1	0.81098546	0.18901454	1	0.810679612	0.895442359	0.979187024	0.020812976	0.848761408	0.870320856	0.859405941
376	1	0	1	1	1	0.81098546	0.18901454	1	0.810679612	0.895442359	0.979187024	0.020812976	0.848761408	0.870320856	0.859405941
376	1	0	1	1	1	0.81098546	0.18901454	1	0.810679612	0.895442359	0.979187024	0.020812976	0.848761408	0.870320856	0.859405941
376	1	0	1	1	1	0.81098546	0.18901454	1	0.810679612	0.895442359	0.979187024	0.020812976	0.848761408	0.870320856	0.859405941
375	1	0	1	1	1	0.8105939	0.1894061	1	0.810289389	0.895204263	0.979472141	0.020527859	0.850393701	0.870967742	0.860557769
375	1	0	1	1	1	0.8105939	0.1894061	1	0.810289389	0.895204263	0.979472141	0.020527859	0.850393701	0.870967742	0.860557769
375	1	0	1	1	1	0.8105939	0.1894061	1	0.810289389	0.895204263	0.979472141	0.020527859	0.850393701	0.870967742	0.860557769
374	1	0	1	1	1	0.812703583	0.187296417	1	0.812398042	0.896489649	0.979197187	0.020802813	0.849740933	0.871181939	0.860327869
373	1	0	1	1	1	0.814634146	0.185365854	1	0.814332248	0.897666068	0.979292831	0.020707169	0.850649351	0.871010638	0.860709593
373	1	0	1	1	1	0.814634146	0.185365854	1	0.814332248	0.897666068	0.979292831	0.020707169	0.850649351	0.871010638	0.860709593
372	1	0	1	1	1	0.816260163	0.183739837	1	0.815960912	0.898654709	0.979390506	0.020609494	0.850843061	0.872340426	0.861457649
371	1	0	1	1	1	0.819063005	0.180936995	1	0.818770227	0.900355872	0.979773305	0.020226695	0.854521625	0.871657754	0.863004633
371	1	0	1	1	1	0.819063005	0.180936995	1	0.818770227	0.900355872	0.979773305	0.020226695	0.854521625	0.871657754	0.863004633
371	1	0	1	1	1	0.819063005	0.180936995	1	0.818770227	0.900355872	0.979773305	0.020226695	0.854521625	0.871657754	0.863004633
371	1	0	1	1	1	0.819063005	0.180936995	1	0.818770227	0.900355872	0.979773305	0.020226695	0.854521625	0.871657754	0.863004633
371	1	0	1	1	1	0.819063005	0.180936995	1	0.818770227	0.900355872	0.979773305	0.020226695	0.854521625	0.871657754	0.863004633
371	1	0	1	1	1	0.819063005	0.180936995	1	0.818770227	0.900355872	0.979773305	0.020226695	0.854521625	0.871657754	0.863004633
371	1	0	1	1	1	0.819063005	0.180936995	1	0.818770227	0.900355872	0.979773305	0.020226695	0.854521625	0.871657754	0.863004633
371	1	0	1	1	1	0.819063005	0.180936995	1	0.818770227	0.900355872	0.979773305	0.020226695	0.854521625	0.871657754	0.863004633
371	1	0	1	1	1	0.819063005	0.180936995	1	0.818770227	0.900355872	0.979773305	0.020226695	0.854521625	0.871657754	0.863004633
371	1	0	1	1	1	0.819063005	0.180936995	1	0.818770227	0.900355872	0.979773305	0.020226695	0.854521625	0.871657754	0.863004633
371	1	0	1	1	1	0.819063005	0.180936995	1	0.818770227	0.900355872	0.979773305	0.020226695	0.854521625	0.871657754	0.863004633
371	1	0	1	1	1	0.819063005	0.180936995	1	0.818770227	0.900355872	0.979773305	0.020226695	0.854521625	0.871657754	0.863004633
371	1	0	1	1	1	0.819063005	0.180936995	1	0.818770227	0.900355872	0.979773305	0.020226695	0.854521625	0.871657754	0.863004633
371	1	0	1	1	1	0.819063005	0.180936995	1	0.818770227	0.900355872	0.979773305	0.020226695	0.854521625	0.871657754	0.863004633
371	1	0	1	1	1	0.819063005	0.180936995	1	0.818770227	0.900355872	0.979773305	0.020226695	0.854521625	0.871657754	0.863004633
371	1	0	1	1	1	0.819063005	0.180936995	1	0.818770227	0.900355872	0.979773305	0.020226695	0.854521625	0.871657754	0.863004633
371	1	0	1	1	1	0.819063005	0.180936995	1	0.818770227	0.900355872	0.979773305	0.020226695	0.854521625	0.871657754	0.863004633
371	1	0	1	1	1	0.819063005	0.180936995	1	0.818770227	0.900355872	0.979773305	0.020226695	0.854521625	0.871657754	0.863004633
371	1	0	1	1	1	0.819063005	0.180936995	1	0.818770227	0.900355872	0.979773305	0.020226695	0.854521625	0.871657754	0.863004633
371	1	0	1	1	1	0.819063005	0.180936995	1	0.818770227	0.900355872	0.979773305	0.020226695	0.854521625	0.871657754	0.863004633
371	1	0	1	1	1	0.819063005	0.180936995	1	0.818770227	0.900355872	0.979773305	0.020226695	0.854521625	0.871657754	0.863004633
371	1	0	1	1	1	0.819063005	0.180936995	1	0.818770227	0.900355872	0.979773305	0.020226695	0.854521625	0.871657754	0.863004633
371	1	0	1	1	1	0.819063005	0.180936995	1	0.818770227	0.900355872	0.979773305	0.020226695	0.854521625	0.871657754	0.863004633
371	1	0	1	1	1	0.819063005	0.180936995	1	0.818770227	0.900355872	0.979773305	0.020226695	0.854521625	0.871657754	0.863004633
371	1	0	1	1	1	0.819063005	0.180936995	1	0.818770227	0.900355872	0.979773305	0.020226695	0.854521625	0.871657754	0.863004633
371	1	0	1	1	1	0.819063005	0.180936995	1	0.818770227	0.900355872	0.979773305	0.020226695	0.854521625	0.871657754	0.863004633
371	1	0	1	1	1	0.819063005	0.180936995	1	0.818770227	0.900355872	0.979773305	0.020226695	0.854521625	0.871657754	0.863004633
371	1	0	1	1	1	0.819063005	0.180936995	1	0.818770227	0.900355872	0.979773305	0.020226695	0.854521625	0.871657754	0.863004633
371	1	0	1	1	1	0.819063005	0.180936995	1	0.818770227	0.900355872	0.979773305	0.020226695	0.854521625	0.871657754	0.863004633
371	1	0	1	1	1	0.819063005	0.180936995	1	0.818770227	0.900355872	0.979773305	0.020226695	0.854521625	0.871657754	0.863004633
371	1	0	1	1	1	0.819063005	0.180936995	1	0.818770227	0.900355872	0.979773305	0.020226695	0.854521625	0.871657754	0.863004633
371	1	0	1	1	1	0.819063005	0.180936995	1	0.818770227	0.900355872	0.979773305	0.020226695	0.854521625	0.871657754	0.863004633
370	1	0	1	1	1	0.817275748	0.182724252	1	0.817275748	0.899451554	0.9799044	0.0200956	0.861398964	0.870418848	0.865885417
370	1	0	1	1	1	0.817275748	0.182724252	1	0.817275748	0.899451554	0.9799044	0.0200956	0.861398964	0.870418848	0.865885417
370	1	0	1	1	1	0.817275748	0.182724252	1	0.817275748	0.899451554	0.9799044	0.0200956	0.861398964	0.870418848	0.865885417
369	1	0	1	1	1	0.818936877	0.181063123	1	0.818936877	0.900456621	0.9799044	0.0200956	0.861398964	0.870418848	0.865885417
369	1	0	1	1	1	0.818936877	0.181063123	1	0.818936877	0.900456621	0.9799044	0.0200956	0.861398964	0.870418848	0.865885417
368	1	0	1	1	1	0.820299501	0.179700499	1	0.820299501	0.901279707	0.97990636	0.02009364	0.861578266	0.870588235	0.866059818
368	1	0	1	1	1	0.820299501	0.179700499	1	0.820299501	0.901279707	0.97990636	0.02009364	0.861578266	0.870588235	0.866059818
368	1	0	1	1	1	0.820299501	0.179700499	1	0.820299501	0.901279707	0.97990636	0.02009364	0.861578266	0.870588235	0.866059818
368	1	0	1	1	1	0.820299501	0.179700499	1	0.820299501	0.901279707	0.97990636	0.02009364	0.861578266	0.870588235	0.866059818
368	1	0	1	1	1	0.820299501	0.179700499	1	0.820299501	0.901279707	0.97990636	0.02009364	0.861578266	0.870588235	0.866059818
368	1	0	1	1	1	0.820299501	0.179700499	1	0.820299501	0.901279707	0.97990636	0.02009364	0.861578266	0.870588235	0.866059818
367	1	0	1	1	1	0.821368948	0.178631052	1	0.821368948	0.90192484	0.979910279	0.020089721	0.861935484	0.870925684	0.866407263
367	1	0	1	1	1	0.821368948	0.178631052	1	0.821368948	0.90192484	0.979910279	0.020089721	0.861935484	0.870925684	0.866407263
367	1	0	1	1	1	0.821368948	0.178631052	1	0.821368948	0.90192484	0.979910279	0.020089721	0.861935484	0.870925684	0.866407263
367	1	0	1	1	1	0.821368948	0.178631052	1	0.821368948	0.90192484	0.979910279	0.020089721	0.861935484	0.870925684	0.866407263
367	1	0	1	1	1	0.821368948	0.178631052	1	0.821368948	0.90192484	0.979910279	0.020089721	0.861935484	0.870925684	0.866407263
367	1	0	1	1	1	0.821368948	0.178631052	1	0.821368948	0.90192484	0.979910279	0.020089721	0.861935484	0.870925684	0.866407263
367	1	0	1	1	1	0.821368948	0.178631052	1	0.821368948	0.90192484	0.979910279	0.020089721	0.861935484	0.870925684	0.866407263
367	1	0	1	1	1	0.821368948	0.178631052	1	0.821368948	0.90192484	0.979910279	0.020089721	0.861935484	0.870925684	0.866407263
367	1	0	1	1	1	0.821368948	0.178631052	1	0.821368948	0.90192484	0.979910279	0.020089721	0.861935484	0.870925684	0.866407263
367	1	0	1	1	1	0.821368948	0.178631052	1	0.821368948	0.90192484	0.979910279	0.020089721	0.861935484	0.870925684	0.866407263
367	1	0	1	1	1	0.821368948	0.178631052	1	0.821368948	0.90192484	0.979910279	0.020089721	0.861935484	0.870925684	0.866407263
367	1	0	1	1	1	0.821368948	0.178631052	1	0.821368948	0.90192484	0.979910279	0.020089721	0.861935484	0.870925684	0.866407263
367	1	0	1	1	1	0.821368948	0.178631052	1	0.821368948	0.90192484	0.979910279	0.020089721	0.861935484	0.870925684	0.866407263
367	1	0	1	1	1	0.821368948	0.178631052	1	0.821368948	0.90192484	0.979910279	0.020089721	0.861935484	0.870925684	0.866407263
367	1	0	1	1	1	0.821368948	0.178631052	1	0.821368948	0.90192484	0.979910279	0.020089721	0.861935484	0.870925684	0.866407263
367	1	0	1	1	1	0.821368948	0.178631052	1	0.821368948	0.90192484	0.979910279	0.020089721	0.861935484	0.870925684	0.866407263
367	1	0	1	1	1	0.821368948	0.178631052	1	0.821368948	0.90192484	0.979910279	0.020089721	0.861935484	0.870925684	0.866407263
367	1	0	1	1	1	0.821368948	0.178631052	1	0.821368948	0.90192484	0.979910279	0.020089721	0.861935484	0.870925684	0.866407263
367	1	0	1	1	1	0.821368948	0.178631052	1	0.821368948	0.90192484	0.979910279	0.020089721	0.861935484	0.870925684	0.866407263
367	1	0	1	1	1	0.821368948	0.178631052	1	0.821368948	0.90192484	0.979910279	0.020089721	0.861935484	0.870925684	0.866407263
367	1	0	1	1	1	0.821368948	0.178631052	1	0.821368948	0.90192484	0.979910279	0.020089721	0.861935484	0.870925684	0.866407263
367	1	0	1	1	1	0.821368948	0.178631052	1	0.821368948	0.90192484	0.979910279	0.020089721	0.861935484	0.870925684	0.866407263
367	1	0	1	1	1	0.821368948	0.178631052	1	0.821368948	0.90192484	0.979910279	0.020089721	0.861935484	0.870925684	0.866407263
367	1	0	1	1	1	0.821368948	0.178631052	1	0.821368948	0.90192484	0.979910279	0.020089721	0.861935484	0.870925684	0.866407263
367	1	0	1	1	1	0.821368948	0.178631052	1	0.821368948	0.90192484	0.979910279	0.020089721	0.861935484	0.870925684	0.866407263
367	1	0	1	1	1	0.821368948	0.178631052	1	0.821368948	0.90192484	0.979910279	0.020089721	0.861935484	0.870925684	0.866407263
367	1	0	1	1	1	0.821368948	0.178631052	1	0.821368948	0.90192484	0.979910279	0.020089721	0.861935484	0.870925684	0.866407263
367	1	0	1	1	1	0.821368948	0.178631052	1	0.821368948	0.90192484	0.979910279	0.020089721	0.861935484	0.870925684	0.866407263
367	1	0	1	1	1	0.821368948	0.178631052	1	0.821368948	0.90192484	0.979910279	0.020089721	0.861935484	0.870925684	0.866407263
367	1	0	1	1	1	0.821368948	0.178631052	1	0.821368948	0.90192484	0.979910279	0.020089721	0.861935484	0.870925684	0.866407263
367	1	0	1	1	1	0.821368948	0.178631052	1	0.821368948	0.90192484	0.979910279	0.020089721	0.861935484	0.870925684	0.866407263
367	1	0	1	1	1	0.821368948	0.178631052	1	0.821368948	0.90192484	0.979910279	0.020089721	0.861935484	0.870925684	0.866407263
367	1	0	1	1	1	0.821368948	0.178631052	1	0.821368948	0.90192484	0.979910279	0.020089721	0.861935484	0.870925684	0.866407263
367	1	0	1	1	1	0.821368948	0.178631052	1	0.821368948	0.90192484	0.979910279	0.020089721	0.861935484	0.870925684	0.866407263
367	1	0	1	1	1	0.821368948	0.178631052	1	0.821368948	0.90192484	0.979910279	0.020089721	0.861935484	0.870925684	0.866407263
367	1	0	1	1	1	0.821368948	0.178631052	1	0.821368948	0.90192484	0.979910279	0.020089721	0.861935484	0.870925684	0.866407263
367	1	0	1	1	1	0.821368948	0.178631052	1	0.821368948	0.90192484	0.979910279	0.020089721	0.861935484	0.870925684	0.866407263
367	1	0	1	1	1	0.821368948	0.178631052	1	0.821368948	0.90192484	0.979910279	0.020089721	0.861935484	0.870925684	0.866407263
367	1	0	1	1	1	0.821368948	0.178631052	1	0.821368948	0.90192484	0.979910279	0.020089721	0.861935484	0.870925684	0.866407263
367	1	0	1	1	1	0.821368948	0.178631052	1	0.821368948	0.90192484	0.979910279	0.020089721	0.861935484	0.870925684	0.866407263
367	1	0	1	1	1	0.821368948	0.178631052	1	0.821368948	0.90192484	0.979910279	0.020089721	0.861935484	0.870925684	0.866407263
367	1	0	1	1	1	0.821368948	0.178631052	1	0.821368948	0.90192484	0.979910279	0.020089721	0.861935484	0.870925684	0.866407263
367	1	0	1	1	1	0.821368948	0.178631052	1	0.821368948	0.90192484	0.979910279	0.020089721	0.861935484	0.870925684	0.866407263
367	1	0	1	1	1	0.821368948	0.178631052	1	0.821368948	0.90192484	0.979910279	0.020089721	0.861935484	0.870925684	0.866407263
367	1	0	1	1	1	0.821368948	0.178631052	1	0.821368948	0.90192484	0.979910279	0.020089721	0.861935484	0.870925684	0.866407263
367	1	0	1	1	1	0.821368948	0.178631052	1	0.821368948	0.90192484	0.979910279	0.020089721	0.861935484	0.870925684	0.866407263
367	1	0	1	1	1	0.821368948	0.178631052	1	0.821368948	0.90192484	0.979910279	0.020089721	0.861935484	0.870925684	0.866407263
367	1	0	1	1	1	0.821368948	0.178631052	1	0.821368948	0.90192484	0.979910279	0.020089721	0.861935484	0.870925684	0.866407263
367	1	0	1	1	1	0.821368948	0.178631052	1	0.821368948	0.90192484	0.979910279	0.020089721	0.861935484	0.870925684	0.866407263
367	1	0	1	1	1	0.821368948	0.178631052	1	0.821368948	0.90192484	0.979910279	0.020089721	0.861935484	0.870925684	0.866407263
367	1	0	1	1	1	0.821368948	0.178631052	1	0.821368948	0.90192484	0.979910279	0.020089721	0.861935484	0.870925684	0.866407263
367	1	0	1	1	1	0.821368948	0.178631052	1	0.821368948	0.90192484	0.979910279	0.020089721	0.861935484	0.870925684	0.866407263
367	1	0	1	1	1	0.821368948	0.178631052	1	0.821368948	0.90192484	0.979910279	0.020089721	0.861935484	0.870925684	0.866407263
367	1	0	1	1	1	0.821368948	0.178631052	1	0.821368948	0.90192484	0.979910279	0.020089721	0.861935484	0.870925684	0.866407263
367	1	0	1	1	1	0.821368948	0.178631052	1	0.821368948	0.90192484	0.979910279	0.020089721	0.861935484	0.870925684	0.866407263
367	1	0	1	1	1	0.821368948	0.178631052	1	0.821368948	0.90192484	0.979910279	0.020089721	0.861935484	0.870925684	0.866407263
367	1	0	1	1	1	0.821368948	0.178631052	1	0.821368948	0.90192484	0.979910279	0.020089721	0.861935484	0.870925684	0.866407263
367	1	0	1	1	1	0.821368948	0.178631052	1	0.821368948	0.90192484	0.979910279	0.020089721	0.861935484	0.870925684	0.866407263
367	1	0	1	1	1	0.821368948	0.178631052	1	0.821368948	0.90192484	0.979910279	0.020089721	0.861935484	0.870925684	0.866407263
367	1	0	1	1	1	0.821368948	0.178631052	1	0.821368948	0.90192484	0.979910279	0.020089721	0.861935484	0.870925684	0.866407263
367	1	0	1	1	1	0.821368948	0.178631052	1	0.821368948	0.90192484	0.979910279	0.020089721	0.861935484	0.870925684	0.866407263
367	1	0	1	1	1	0.821368948	0.178631052	1	0.821368948	0.90192484	0.979910279	0.020089721	0.861935484	0.870925684	0.866407263
367	1	0	1	1	1	0.821368948	0.178631052	1	0.821368948	0.90192484	0.979910279	0.020089721	0.861935484	0.870925684	0.866407263
367	1	0	1	1	1	0.821368948	0.178631052	1	0.821368948	0.90192484	0.979910279	0.020089721	0.861935484	0.870925684	0.866407263
367	1	0	1	1	1	0.821368948	0.178631052	1	0.821368948	0.90192484	0.979910279	0.020089721	0.861935484	0.870925684	0.866407263
367	1	0	1	1	1	0.821368948	0.178631052	1	0.821368948	0.90192484	0.979910279	0.020089721	0.861935484	0.870925684	0.866407263
367	1	0	1	1	1	0.821368948	0.178631052	1	0.821368948	0.90192484	0.979910279	0.020089721	0.861935484	0.870925684	0.866407263
367	1	0	1	1	1	0.821368948	0.178631052	1	0.821368948	0.90192484	0.979910279	0.020089721	0.861935484	0.870925684	0.866407263
367	1	0	1	1	1	0.821368948	0.178631052	1	0.821368948	0.90192484	0.979910279	0.020089721	0.861935484	0.870925684	0.866407263
367	1	0	1	1	1	0.821368948	0.178631052	1	0.821368948	0.90192484	0.979910279	0.020089721	0.861935484	0.870925684	0.866407263
367	1	0	1	1	1	0.821368948	0.178631052	1	0.821368948	0.90192484	0.979910279	0.020089721	0.861935484	0.870925684	0.866407263
367	1	0	1	1	1	0.821368948	0.178631052	1	0.821368948	0.90192484	0.979910279	0.020089721	0.861935484	0.870925684	0.866407263
367	1	0	1	1	1	0.821368948	0.178631052	1	0.821368948	0.90192484	0.979910279	0.020089721	0.861935484	0.870925684	0.866407263
367	1	0	1	1	1	0.821368948	0.178631052	1	0.821368948	0.90192484	0.979910279	0.020089721	0.861935484	0.870925684	0.866407263
367	1	0	1	1	1	0.821368948	0.178631052	1	0.821368948	0.90192484	0.979910279	0.020089721	0.861935484	0.870925684	0.866407263
367	1	0	1	1	1	0.821368948	0.178631052	1	0.821368948	0.90192484	0.979910279	0.020089721	0.861935484	0.870925684	0.866407263
367	1	0	1	1	1	0.821368948	0.178631052	1	0.821368948	0.90192484	0.979910279	0.020089721	0.861935484	0.870925684	0.866407263
367	1	0	1	1	1	0.821368948	0.178631052	1	0.821368948	0.90192484	0.979910279	0.020089721	0.861935484	0.870925684	0.866407263
367	1	0	1	1	1	0.821368948	0.178631052	1	0.821368948	0.90192484	0.979910279	0.020089721	0.861935484	0.870925684	0.866407263
367	1	0	1	1	1	0.821368948	0.178631052	1	0.821368948	0.90192484	0.979910279	0.020089721	0.861935484	0.870925684	0.866407263
367	1	0	1	1	1	0.821368948	0.178631052	1	0.821368948	0.90192484	0.979910279	0.020089721	0.861935484	0.870925684	0.866407263
367	1	0	1	1	1	0.821368948	0.178631052	1	0.821368948	0.90192484	0.979910279	0.020089721	0.861935484	0.870925684	0.866407263
367	1	0	1	1	1	0.821368948	0.178631052	1	0.821368948	0.90192484	0.979910279	0.020089721	0.861935484	0.870925684	0.866407263
367	1	0	1	1	1	0.821368948	0.178631052	1	0.821368948	0.90192484	0.979910279	0.020089721	0.861935484	0.870925684	0.866407263
367	1	0	1	1	1	0.821368948	0.178631052	1	0.821368948	0.90192484	0.979910279	0.020089721	0.861935484	0.870925684	0.866407263
367	1	0	1	1	1	0.821368948	0.178631052	1	0.821368948	0.90192484	0.979910279	0.020089721	0.861935484	0.870925684	0.866407263
367	1	0	1	1	1	0.821368948	0.178631052	1	0.821368948	0.90192484	0.979910279	0.020089721	0.861935484	0.870925684	0.866407263
367	1	0	1	1	1	0.821368948	0.178631052	1	0.821368948	0.90192484	0.979910279	0.020089721	0.861935484	0.870925684	0.866407263
367	1	0	1	1	1	0.821368948	0.178631052	1	0.821368948	0.90192484	0.979910279	0.020089721	0.861935484	0.870925684	0.866407263
367	1	0	1	1	1	0.821368948	0.178631052	1	0.821368948	0.90192484	0.979910279	0.020089721	0.861935484	0.870925684	0.866407263
367	1	0	1	1	1	0.821368948	0.178631052	1	0.821368948	0.90192484	0.979910279	0.020089721	0.861935484	0.870925684	0.866407263
367	1	0	1	1	1	0.821368948	0.178631052	1	0.821368948	0.90192484	0.979910279	0.020089721	0.861935484	0.870925684	0.866407263
367	1	0	1	1	1	0.821368948	0.178631052	1	0.821368948	0.90192484	0.979910279	0.020089721	0.861935484	0.870925684	0.866407263
367	1	0	1	1	1	0.821368948	0.178631052	1	0.821368948	0.90192484	0.979910279	0.020089721	0.861935484	0.870925684	0.866407263
367	1	0	1	1	1	0.821368948	0.178631052	1	0.821368948	0.90192484	0.979910279	0.020089721	0.861935484	0.870925684	0.866407263
367	1	0	1	1	1	0.821368948	0.178631052	1	0.821368948	0.90192484	0.979910279	0.020089721	0.861935484	0.870925684	0.866407263
367	1	0	1	1	1	0.821368948	0.178631052	1	0.821368948	0.90192484	0.979910279	0.020089721	0.861935484	0.870925684	0.866407263
367	1	0	1	1	1	0.821368948	0.178631052	1	0.821368948	0.90192484	0.979910279	0.020089721	0.861935484	0.870925684	0.866407263
367	1	0	1	1	1	0.821368948	0.178631052	1	0.821368948	0.90192484	0.979910279	0.020089721	0.861935484	0.870925684	0.866407263
367	1	0	1	1	1	0.821368948	0.178631052	1	0.821368948	0.90192484	0.979910279	0.020089721	0.861935484	0.870925684	0.866407263
367	1	0	1	1	1	0.821368948	0.178631052	1	0.821368948	0.90192484	0.979910279	0.020089721	0.861935484	0.870925684	0.866407263
367	1	0	1	1	1	0.821368948	0.178631052	1	0.821368948	0.90192484	0.979910279	0.020089721	0.861935484	0.870925684	0.866407263
