# Supplementary material for: An Improved Hybrid Feature Selection Algorithm for Electric Charge Recovery Risk
Source: Hindawi journal article supplement (doi:10.1155/2020/8479341), 2020-08-28
Supplement: f1 [file 8479341.f1.zip › 8479341.f1/Experimental Results/201807/HPSO_SSM_results.csv]

features_num	Accuracy_high	Loss_high	Precission_high	Recall_high	F1_high	Accuracy_med	Loss_med	Precission_med	Recall_med	F1_med	Accuracy_low	Loss_low	Precission_low	Recall_low	F1_low
365	1.0	0.0	1.0	1.0	1.0	0.7861915367483296	0.21380846325167036	0.9467787114845938	0.8144578313253013	0.8756476683937824	0.9178042684099211	0.08219573159007887	0.5358231707317073	0.7407797681770284	0.6218487394957982
321	1.0	0.0	1.0	1.0	1.0	0.8575624082232012	0.14243759177679882	0.9965635738831615	0.8592592592592593	0.922832140015911	0.9500295101318119	0.049970489868188084	0.585838991270611	0.8817518248175182	0.703962703962704
321	1.0	0.0	1.0	1.0	1.0	0.8575624082232012	0.14243759177679882	0.9965635738831615	0.8592592592592593	0.922832140015911	0.9502262443438914	0.04977375565610864	0.586977648202138	0.8817518248175182	0.7047841306884481
321	1.0	0.0	1.0	1.0	1.0	0.8575624082232012	0.14243759177679882	0.9965635738831615	0.8592592592592593	0.922832140015911	0.9502262443438914	0.04977375565610864	0.586977648202138	0.8817518248175182	0.7047841306884481
321	1.0	0.0	1.0	1.0	1.0	0.8575624082232012	0.14243759177679882	0.9965635738831615	0.8592592592592593	0.922832140015911	0.9502262443438914	0.04977375565610864	0.586977648202138	0.8817518248175182	0.7047841306884481
321	1.0	0.0	1.0	1.0	1.0	0.8575624082232012	0.14243759177679882	0.9965635738831615	0.8592592592592593	0.922832140015911	0.9502262443438914	0.04977375565610864	0.586977648202138	0.8817518248175182	0.7047841306884481
321	1.0	0.0	1.0	1.0	1.0	0.8575624082232012	0.14243759177679882	0.9965635738831615	0.8592592592592593	0.922832140015911	0.9502262443438914	0.04977375565610864	0.586977648202138	0.8817518248175182	0.7047841306884481
321	1.0	0.0	1.0	1.0	1.0	0.8575624082232012	0.14243759177679882	0.9965635738831615	0.8592592592592593	0.922832140015911	0.9502262443438914	0.04977375565610864	0.586977648202138	0.8817518248175182	0.7047841306884481
321	1.0	0.0	1.0	1.0	1.0	0.8575624082232012	0.14243759177679882	0.9965635738831615	0.8592592592592593	0.922832140015911	0.9502262443438914	0.04977375565610864	0.586977648202138	0.8817518248175182	0.7047841306884481
321	1.0	0.0	1.0	1.0	1.0	0.8575624082232012	0.14243759177679882	0.9965635738831615	0.8592592592592593	0.922832140015911	0.9502262443438914	0.04977375565610864	0.586977648202138	0.8817518248175182	0.7047841306884481
321	1.0	0.0	1.0	1.0	1.0	0.8575624082232012	0.14243759177679882	0.9965635738831615	0.8592592592592593	0.922832140015911	0.9502262443438914	0.04977375565610864	0.586977648202138	0.8817518248175182	0.7047841306884481
321	1.0	0.0	1.0	1.0	1.0	0.8575624082232012	0.14243759177679882	0.9965635738831615	0.8592592592592593	0.922832140015911	0.9502262443438914	0.04977375565610864	0.586977648202138	0.8817518248175182	0.7047841306884481
321	1.0	0.0	1.0	1.0	1.0	0.8575624082232012	0.14243759177679882	0.9965635738831615	0.8592592592592593	0.922832140015911	0.9502262443438914	0.04977375565610864	0.586977648202138	0.8817518248175182	0.7047841306884481
321	1.0	0.0	1.0	1.0	1.0	0.8575624082232012	0.14243759177679882	0.9965635738831615	0.8592592592592593	0.922832140015911	0.9502262443438914	0.04977375565610864	0.586977648202138	0.8817518248175182	0.7047841306884481
321	1.0	0.0	1.0	1.0	1.0	0.8575624082232012	0.14243759177679882	0.9965635738831615	0.8592592592592593	0.922832140015911	0.9502262443438914	0.04977375565610864	0.586977648202138	0.8817518248175182	0.7047841306884481
321	1.0	0.0	1.0	1.0	1.0	0.8575624082232012	0.14243759177679882	0.9965635738831615	0.8592592592592593	0.922832140015911	0.9502262443438914	0.04977375565610864	0.586977648202138	0.8817518248175182	0.7047841306884481
321	1.0	0.0	1.0	1.0	1.0	0.8575624082232012	0.14243759177679882	0.9965635738831615	0.8592592592592593	0.922832140015911	0.9502262443438914	0.04977375565610864	0.586977648202138	0.8817518248175182	0.7047841306884481
321	1.0	0.0	1.0	1.0	1.0	0.8575624082232012	0.14243759177679882	0.9965635738831615	0.8592592592592593	0.922832140015911	0.9502262443438914	0.04977375565610864	0.586977648202138	0.8817518248175182	0.7047841306884481
341	1.0	0.0	1.0	1.0	1.0	0.8424015009380863	0.1575984990619137	1.0	0.8424015009380863	0.9144602851323829	0.9697703710880728	0.030229628911927153	0.7696280991735537	0.8932853717026379	0.8268590455049944
341	1.0	0.0	1.0	1.0	1.0	0.8424015009380863	0.1575984990619137	1.0	0.8424015009380863	0.9144602851323829	0.9697703710880728	0.030229628911927153	0.7696280991735537	0.8932853717026379	0.8268590455049944
341	1.0	0.0	1.0	1.0	1.0	0.8424015009380863	0.1575984990619137	1.0	0.8424015009380863	0.9144602851323829	0.9697703710880728	0.030229628911927153	0.7696280991735537	0.8932853717026379	0.8268590455049944
341	1.0	0.0	1.0	1.0	1.0	0.8424015009380863	0.1575984990619137	1.0	0.8424015009380863	0.9144602851323829	0.9697703710880728	0.030229628911927153	0.7696280991735537	0.8932853717026379	0.8268590455049944
341	1.0	0.0	1.0	1.0	1.0	0.8424015009380863	0.1575984990619137	1.0	0.8424015009380863	0.9144602851323829	0.9697703710880728	0.030229628911927153	0.7696280991735537	0.8932853717026379	0.8268590455049944
341	1.0	0.0	1.0	1.0	1.0	0.8424015009380863	0.1575984990619137	1.0	0.8424015009380863	0.9144602851323829	0.9697703710880728	0.030229628911927153	0.7696280991735537	0.8932853717026379	0.8268590455049944
341	1.0	0.0	1.0	1.0	1.0	0.8424015009380863	0.1575984990619137	1.0	0.8424015009380863	0.9144602851323829	0.9697703710880728	0.030229628911927153	0.7696280991735537	0.8932853717026379	0.8268590455049944
341	1.0	0.0	1.0	1.0	1.0	0.8424015009380863	0.1575984990619137	1.0	0.8424015009380863	0.9144602851323829	0.9697703710880728	0.030229628911927153	0.7696280991735537	0.8932853717026379	0.8268590455049944
341	1.0	0.0	1.0	1.0	1.0	0.8424015009380863	0.1575984990619137	1.0	0.8424015009380863	0.9144602851323829	0.9697703710880728	0.030229628911927153	0.7696280991735537	0.8932853717026379	0.8268590455049944
341	1.0	0.0	1.0	1.0	1.0	0.8424015009380863	0.1575984990619137	1.0	0.8424015009380863	0.9144602851323829	0.9697703710880728	0.030229628911927153	0.7696280991735537	0.8932853717026379	0.8268590455049944
341	1.0	0.0	1.0	1.0	1.0	0.8424015009380863	0.1575984990619137	1.0	0.8424015009380863	0.9144602851323829	0.9697703710880728	0.030229628911927153	0.7696280991735537	0.8932853717026379	0.8268590455049944
341	1.0	0.0	1.0	1.0	1.0	0.8424015009380863	0.1575984990619137	1.0	0.8424015009380863	0.9144602851323829	0.9697703710880728	0.030229628911927153	0.7696280991735537	0.8932853717026379	0.8268590455049944
341	1.0	0.0	1.0	1.0	1.0	0.8424015009380863	0.1575984990619137	1.0	0.8424015009380863	0.9144602851323829	0.9697703710880728	0.030229628911927153	0.7696280991735537	0.8932853717026379	0.8268590455049944
341	1.0	0.0	1.0	1.0	1.0	0.8424015009380863	0.1575984990619137	1.0	0.8424015009380863	0.9144602851323829	0.9697703710880728	0.030229628911927153	0.7696280991735537	0.8932853717026379	0.8268590455049944
341	1.0	0.0	1.0	1.0	1.0	0.8424015009380863	0.1575984990619137	1.0	0.8424015009380863	0.9144602851323829	0.9697703710880728	0.030229628911927153	0.7696280991735537	0.8932853717026379	0.8268590455049944
341	1.0	0.0	1.0	1.0	1.0	0.8424015009380863	0.1575984990619137	1.0	0.8424015009380863	0.9144602851323829	0.9697703710880728	0.030229628911927153	0.7696280991735537	0.8932853717026379	0.8268590455049944
341	1.0	0.0	1.0	1.0	1.0	0.8424015009380863	0.1575984990619137	1.0	0.8424015009380863	0.9144602851323829	0.9697703710880728	0.030229628911927153	0.7696280991735537	0.8932853717026379	0.8268590455049944
341	1.0	0.0	1.0	1.0	1.0	0.8424015009380863	0.1575984990619137	1.0	0.8424015009380863	0.9144602851323829	0.9697703710880728	0.030229628911927153	0.7696280991735537	0.8932853717026379	0.8268590455049944
341	1.0	0.0	1.0	1.0	1.0	0.8424015009380863	0.1575984990619137	1.0	0.8424015009380863	0.9144602851323829	0.9697703710880728	0.030229628911927153	0.7696280991735537	0.8932853717026379	0.8268590455049944
341	1.0	0.0	1.0	1.0	1.0	0.8424015009380863	0.1575984990619137	1.0	0.8424015009380863	0.9144602851323829	0.9697703710880728	0.030229628911927153	0.7696280991735537	0.8932853717026379	0.8268590455049944
341	1.0	0.0	1.0	1.0	1.0	0.8424015009380863	0.1575984990619137	1.0	0.8424015009380863	0.9144602851323829	0.9697703710880728	0.030229628911927153	0.7696280991735537	0.8932853717026379	0.8268590455049944
341	1.0	0.0	1.0	1.0	1.0	0.8424015009380863	0.1575984990619137	1.0	0.8424015009380863	0.9144602851323829	0.9697703710880728	0.030229628911927153	0.7696280991735537	0.8932853717026379	0.8268590455049944
341	1.0	0.0	1.0	1.0	1.0	0.8424015009380863	0.1575984990619137	1.0	0.8424015009380863	0.9144602851323829	0.9697703710880728	0.030229628911927153	0.7696280991735537	0.8932853717026379	0.8268590455049944
341	1.0	0.0	1.0	1.0	1.0	0.8424015009380863	0.1575984990619137	1.0	0.8424015009380863	0.9144602851323829	0.9697703710880728	0.030229628911927153	0.7696280991735537	0.8932853717026379	0.8268590455049944
341	1.0	0.0	1.0	1.0	1.0	0.8424015009380863	0.1575984990619137	1.0	0.8424015009380863	0.9144602851323829	0.9697703710880728	0.030229628911927153	0.7696280991735537	0.8932853717026379	0.8268590455049944
341	1.0	0.0	1.0	1.0	1.0	0.8424015009380863	0.1575984990619137	1.0	0.8424015009380863	0.9144602851323829	0.9697703710880728	0.030229628911927153	0.7696280991735537	0.8932853717026379	0.8268590455049944
341	1.0	0.0	1.0	1.0	1.0	0.8424015009380863	0.1575984990619137	1.0	0.8424015009380863	0.9144602851323829	0.9697703710880728	0.030229628911927153	0.7696280991735537	0.8932853717026379	0.8268590455049944
341	1.0	0.0	1.0	1.0	1.0	0.8424015009380863	0.1575984990619137	1.0	0.8424015009380863	0.9144602851323829	0.9697703710880728	0.030229628911927153	0.7696280991735537	0.8932853717026379	0.8268590455049944
341	1.0	0.0	1.0	1.0	1.0	0.8424015009380863	0.1575984990619137	1.0	0.8424015009380863	0.9144602851323829	0.9698672609243291	0.030132739075670933	0.7704239917269907	0.8932853717026379	0.827318156579678
341	1.0	0.0	1.0	1.0	1.0	0.8424015009380863	0.1575984990619137	1.0	0.8424015009380863	0.9144602851323829	0.9698672609243291	0.030132739075670933	0.7704239917269907	0.8932853717026379	0.827318156579678
341	1.0	0.0	1.0	1.0	1.0	0.8424015009380863	0.1575984990619137	1.0	0.8424015009380863	0.9144602851323829	0.9698672609243291	0.030132739075670933	0.7704239917269907	0.8932853717026379	0.827318156579678
341	1.0	0.0	1.0	1.0	1.0	0.8424015009380863	0.1575984990619137	1.0	0.8424015009380863	0.9144602851323829	0.9698672609243291	0.030132739075670933	0.7704239917269907	0.8932853717026379	0.827318156579678
341	1.0	0.0	1.0	1.0	1.0	0.8424015009380863	0.1575984990619137	1.0	0.8424015009380863	0.9144602851323829	0.9698672609243291	0.030132739075670933	0.7704239917269907	0.8932853717026379	0.827318156579678
341	1.0	0.0	1.0	1.0	1.0	0.8424015009380863	0.1575984990619137	1.0	0.8424015009380863	0.9144602851323829	0.9698672609243291	0.030132739075670933	0.7704239917269907	0.8932853717026379	0.827318156579678
341	1.0	0.0	1.0	1.0	1.0	0.8424015009380863	0.1575984990619137	1.0	0.8424015009380863	0.9144602851323829	0.9698672609243291	0.030132739075670933	0.7704239917269907	0.8932853717026379	0.827318156579678
341	1.0	0.0	1.0	1.0	1.0	0.8424015009380863	0.1575984990619137	1.0	0.8424015009380863	0.9144602851323829	0.9698672609243291	0.030132739075670933	0.7704239917269907	0.8932853717026379	0.827318156579678
341	1.0	0.0	1.0	1.0	1.0	0.8424015009380863	0.1575984990619137	1.0	0.8424015009380863	0.9144602851323829	0.9698672609243291	0.030132739075670933	0.7704239917269907	0.8932853717026379	0.827318156579678
341	1.0	0.0	1.0	1.0	1.0	0.8424015009380863	0.1575984990619137	1.0	0.8424015009380863	0.9144602851323829	0.9698672609243291	0.030132739075670933	0.7704239917269907	0.8932853717026379	0.827318156579678
341	1.0	0.0	1.0	1.0	1.0	0.8424015009380863	0.1575984990619137	1.0	0.8424015009380863	0.9144602851323829	0.9698672609243291	0.030132739075670933	0.7704239917269907	0.8932853717026379	0.827318156579678
341	1.0	0.0	1.0	1.0	1.0	0.8424015009380863	0.1575984990619137	1.0	0.8424015009380863	0.9144602851323829	0.9698672609243291	0.030132739075670933	0.7704239917269907	0.8932853717026379	0.827318156579678
341	1.0	0.0	1.0	1.0	1.0	0.8424015009380863	0.1575984990619137	1.0	0.8424015009380863	0.9144602851323829	0.9698672609243291	0.030132739075670933	0.7704239917269907	0.8932853717026379	0.827318156579678
341	1.0	0.0	1.0	1.0	1.0	0.8424015009380863	0.1575984990619137	1.0	0.8424015009380863	0.9144602851323829	0.9698672609243291	0.030132739075670933	0.7704239917269907	0.8932853717026379	0.827318156579678
341	1.0	0.0	1.0	1.0	1.0	0.8424015009380863	0.1575984990619137	1.0	0.8424015009380863	0.9144602851323829	0.9698672609243291	0.030132739075670933	0.7704239917269907	0.8932853717026379	0.827318156579678
341	1.0	0.0	1.0	1.0	1.0	0.8424015009380863	0.1575984990619137	1.0	0.8424015009380863	0.9144602851323829	0.9698672609243291	0.030132739075670933	0.7704239917269907	0.8932853717026379	0.827318156579678
341	1.0	0.0	1.0	1.0	1.0	0.8424015009380863	0.1575984990619137	1.0	0.8424015009380863	0.9144602851323829	0.9698672609243291	0.030132739075670933	0.7704239917269907	0.8932853717026379	0.827318156579678
341	1.0	0.0	1.0	1.0	1.0	0.8424015009380863	0.1575984990619137	1.0	0.8424015009380863	0.9144602851323829	0.9698672609243291	0.030132739075670933	0.7704239917269907	0.8932853717026379	0.827318156579678
341	1.0	0.0	1.0	1.0	1.0	0.8424015009380863	0.1575984990619137	1.0	0.8424015009380863	0.9144602851323829	0.9698672609243291	0.030132739075670933	0.7704239917269907	0.8932853717026379	0.827318156579678
341	1.0	0.0	1.0	1.0	1.0	0.8424015009380863	0.1575984990619137	1.0	0.8424015009380863	0.9144602851323829	0.9698672609243291	0.030132739075670933	0.7704239917269907	0.8932853717026379	0.827318156579678
341	1.0	0.0	1.0	1.0	1.0	0.8424015009380863	0.1575984990619137	1.0	0.8424015009380863	0.9144602851323829	0.9698672609243291	0.030132739075670933	0.7704239917269907	0.8932853717026379	0.827318156579678
341	1.0	0.0	1.0	1.0	1.0	0.8424015009380863	0.1575984990619137	1.0	0.8424015009380863	0.9144602851323829	0.9698672609243291	0.030132739075670933	0.7704239917269907	0.8932853717026379	0.827318156579678
341	1.0	0.0	1.0	1.0	1.0	0.8424015009380863	0.1575984990619137	1.0	0.8424015009380863	0.9144602851323829	0.9698672609243291	0.030132739075670933	0.7704239917269907	0.8932853717026379	0.827318156579678
341	1.0	0.0	1.0	1.0	1.0	0.8424015009380863	0.1575984990619137	1.0	0.8424015009380863	0.9144602851323829	0.9698672609243291	0.030132739075670933	0.7704239917269907	0.8932853717026379	0.827318156579678
341	1.0	0.0	1.0	1.0	1.0	0.8424015009380863	0.1575984990619137	1.0	0.8424015009380863	0.9144602851323829	0.9698672609243291	0.030132739075670933	0.7704239917269907	0.8932853717026379	0.827318156579678
341	1.0	0.0	1.0	1.0	1.0	0.8424015009380863	0.1575984990619137	1.0	0.8424015009380863	0.9144602851323829	0.9698672609243291	0.030132739075670933	0.7704239917269907	0.8932853717026379	0.827318156579678
341	1.0	0.0	1.0	1.0	1.0	0.8424015009380863	0.1575984990619137	1.0	0.8424015009380863	0.9144602851323829	0.9698672609243291	0.030132739075670933	0.7704239917269907	0.8932853717026379	0.827318156579678
341	1.0	0.0	1.0	1.0	1.0	0.8424015009380863	0.1575984990619137	1.0	0.8424015009380863	0.9144602851323829	0.9698672609243291	0.030132739075670933	0.7704239917269907	0.8932853717026379	0.827318156579678
341	1.0	0.0	1.0	1.0	1.0	0.8424015009380863	0.1575984990619137	1.0	0.8424015009380863	0.9144602851323829	0.9698672609243291	0.030132739075670933	0.7704239917269907	0.8932853717026379	0.827318156579678
341	1.0	0.0	1.0	1.0	1.0	0.8424015009380863	0.1575984990619137	1.0	0.8424015009380863	0.9144602851323829	0.9698672609243291	0.030132739075670933	0.7704239917269907	0.8932853717026379	0.827318156579678
341	1.0	0.0	1.0	1.0	1.0	0.8424015009380863	0.1575984990619137	1.0	0.8424015009380863	0.9144602851323829	0.9698672609243291	0.030132739075670933	0.7704239917269907	0.8932853717026379	0.827318156579678
341	1.0	0.0	1.0	1.0	1.0	0.8442776735459663	0.15572232645403372	1.0	0.8442776735459663	0.9155645981688708	0.9696734812518167	0.030326518748183262	0.7688338493292054	0.8932853717026379	0.8264004437049363
341	1.0	0.0	1.0	1.0	1.0	0.8442776735459663	0.15572232645403372	1.0	0.8442776735459663	0.9155645981688708	0.9696734812518167	0.030326518748183262	0.7688338493292054	0.8932853717026379	0.8264004437049363
341	1.0	0.0	1.0	1.0	1.0	0.8442776735459663	0.15572232645403372	1.0	0.8442776735459663	0.9155645981688708	0.9696734812518167	0.030326518748183262	0.7688338493292054	0.8932853717026379	0.8264004437049363
341	1.0	0.0	1.0	1.0	1.0	0.8442776735459663	0.15572232645403372	1.0	0.8442776735459663	0.9155645981688708	0.9696734812518167	0.030326518748183262	0.7688338493292054	0.8932853717026379	0.8264004437049363
341	1.0	0.0	1.0	1.0	1.0	0.8442776735459663	0.15572232645403372	1.0	0.8442776735459663	0.9155645981688708	0.9696734812518167	0.030326518748183262	0.7688338493292054	0.8932853717026379	0.8264004437049363
341	1.0	0.0	1.0	1.0	1.0	0.8442776735459663	0.15572232645403372	1.0	0.8442776735459663	0.9155645981688708	0.9696734812518167	0.030326518748183262	0.7688338493292054	0.8932853717026379	0.8264004437049363
341	1.0	0.0	1.0	1.0	1.0	0.8442776735459663	0.15572232645403372	1.0	0.8442776735459663	0.9155645981688708	0.9696734812518167	0.030326518748183262	0.7688338493292054	0.8932853717026379	0.8264004437049363
341	1.0	0.0	1.0	1.0	1.0	0.8442776735459663	0.15572232645403372	1.0	0.8442776735459663	0.9155645981688708	0.9697703710880728	0.030229628911927153	0.7696280991735537	0.8932853717026379	0.8268590455049944
341	1.0	0.0	1.0	1.0	1.0	0.8442776735459663	0.15572232645403372	1.0	0.8442776735459663	0.9155645981688708	0.9697703710880728	0.030229628911927153	0.7696280991735537	0.8932853717026379	0.8268590455049944
341	1.0	0.0	1.0	1.0	1.0	0.8442776735459663	0.15572232645403372	1.0	0.8442776735459663	0.9155645981688708	0.9697703710880728	0.030229628911927153	0.7696280991735537	0.8932853717026379	0.8268590455049944
341	1.0	0.0	1.0	1.0	1.0	0.8442776735459663	0.15572232645403372	1.0	0.8442776735459663	0.9155645981688708	0.9697703710880728	0.030229628911927153	0.7696280991735537	0.8932853717026379	0.8268590455049944
341	1.0	0.0	1.0	1.0	1.0	0.8442776735459663	0.15572232645403372	1.0	0.8442776735459663	0.9155645981688708	0.9697703710880728	0.030229628911927153	0.7696280991735537	0.8932853717026379	0.8268590455049944
341	1.0	0.0	1.0	1.0	1.0	0.8442776735459663	0.15572232645403372	1.0	0.8442776735459663	0.9155645981688708	0.9697703710880728	0.030229628911927153	0.7696280991735537	0.8932853717026379	0.8268590455049944
341	1.0	0.0	1.0	1.0	1.0	0.8442776735459663	0.15572232645403372	1.0	0.8442776735459663	0.9155645981688708	0.9697703710880728	0.030229628911927153	0.7696280991735537	0.8932853717026379	0.8268590455049944
341	1.0	0.0	1.0	1.0	1.0	0.8442776735459663	0.15572232645403372	1.0	0.8442776735459663	0.9155645981688708	0.9697703710880728	0.030229628911927153	0.7696280991735537	0.8932853717026379	0.8268590455049944
341	1.0	0.0	1.0	1.0	1.0	0.8442776735459663	0.15572232645403372	1.0	0.8442776735459663	0.9155645981688708	0.9697703710880728	0.030229628911927153	0.7696280991735537	0.8932853717026379	0.8268590455049944
341	1.0	0.0	1.0	1.0	1.0	0.8442776735459663	0.15572232645403372	1.0	0.8442776735459663	0.9155645981688708	0.9697703710880728	0.030229628911927153	0.7696280991735537	0.8932853717026379	0.8268590455049944
341	1.0	0.0	1.0	1.0	1.0	0.8442776735459663	0.15572232645403372	1.0	0.8442776735459663	0.9155645981688708	0.9697703710880728	0.030229628911927153	0.7696280991735537	0.8932853717026379	0.8268590455049944
341	1.0	0.0	1.0	1.0	1.0	0.8442776735459663	0.15572232645403372	1.0	0.8442776735459663	0.9155645981688708	0.9697703710880728	0.030229628911927153	0.7696280991735537	0.8932853717026379	0.8268590455049944
341	1.0	0.0	1.0	1.0	1.0	0.8442776735459663	0.15572232645403372	1.0	0.8442776735459663	0.9155645981688708	0.9697703710880728	0.030229628911927153	0.7696280991735537	0.8932853717026379	0.8268590455049944
341	1.0	0.0	1.0	1.0	1.0	0.8442776735459663	0.15572232645403372	1.0	0.8442776735459663	0.9155645981688708	0.9697703710880728	0.030229628911927153	0.7696280991735537	0.8932853717026379	0.8268590455049944
341	1.0	0.0	1.0	1.0	1.0	0.8442776735459663	0.15572232645403372	1.0	0.8442776735459663	0.9155645981688708	0.9697703710880728	0.030229628911927153	0.7696280991735537	0.8932853717026379	0.8268590455049944
341	1.0	0.0	1.0	1.0	1.0	0.8442776735459663	0.15572232645403372	1.0	0.8442776735459663	0.9155645981688708	0.9697703710880728	0.030229628911927153	0.7696280991735537	0.8932853717026379	0.8268590455049944
