# Supplementary material for: An Improved Hybrid Feature Selection Algorithm for Electric Charge Recovery Risk
Source: Hindawi journal article supplement (doi:10.1155/2020/8479341), 2020-08-28
Supplement: f1 [file 8479341.f1.zip › 8479341.f1/Experimental Results/201807/HPSO_SSM_SBS_results.csv]

features_num	Accuracy_high	Loss_high	Precission_high	Recall_high	F1_high	Accuracy_med	Loss_med	Precission_med	Recall_med	F1_med	Accuracy_low	Loss_low	Precission_low	Recall_low	F1_low
341	1	0	1	1	1	0.839552239	0.160447761	1	0.839552239	0.912778905	0.969567746	0.030432254	0.767321613	0.89290012	0.825361513
340	1	0	1	1	1	0.842401501	0.157598499	1	0.842401501	0.914460285	0.969770371	0.030229629	0.769628099	0.893285372	0.826859046
340	1	0	1	1	1	0.842401501	0.157598499	1	0.842401501	0.914460285	0.969770371	0.030229629	0.769628099	0.893285372	0.826859046
340	1	0	1	1	1	0.842401501	0.157598499	1	0.842401501	0.914460285	0.969770371	0.030229629	0.769628099	0.893285372	0.826859046
340	1	0	1	1	1	0.842401501	0.157598499	1	0.842401501	0.914460285	0.969770371	0.030229629	0.769628099	0.893285372	0.826859046
340	1	0	1	1	1	0.842401501	0.157598499	1	0.842401501	0.914460285	0.969770371	0.030229629	0.769628099	0.893285372	0.826859046
340	1	0	1	1	1	0.842401501	0.157598499	1	0.842401501	0.914460285	0.969770371	0.030229629	0.769628099	0.893285372	0.826859046
340	1	0	1	1	1	0.842401501	0.157598499	1	0.842401501	0.914460285	0.969770371	0.030229629	0.769628099	0.893285372	0.826859046
339	1	0	1	1	1	0.842401501	0.157598499	1	0.842401501	0.914460285	0.969964151	0.030035849	0.771221532	0.893285372	0.827777778
339	1	0	1	1	1	0.842401501	0.157598499	1	0.842401501	0.914460285	0.969964151	0.030035849	0.771221532	0.893285372	0.827777778
339	1	0	1	1	1	0.842401501	0.157598499	1	0.842401501	0.914460285	0.969964151	0.030035849	0.771221532	0.893285372	0.827777778
339	1	0	1	1	1	0.842401501	0.157598499	1	0.842401501	0.914460285	0.969964151	0.030035849	0.771221532	0.893285372	0.827777778
339	1	0	1	1	1	0.842401501	0.157598499	1	0.842401501	0.914460285	0.969964151	0.030035849	0.771221532	0.893285372	0.827777778
339	1	0	1	1	1	0.842401501	0.157598499	1	0.842401501	0.914460285	0.969964151	0.030035849	0.771221532	0.893285372	0.827777778
339	1	0	1	1	1	0.842401501	0.157598499	1	0.842401501	0.914460285	0.969964151	0.030035849	0.771221532	0.893285372	0.827777778
339	1	0	1	1	1	0.842401501	0.157598499	1	0.842401501	0.914460285	0.969964151	0.030035849	0.771221532	0.893285372	0.827777778
339	1	0	1	1	1	0.842401501	0.157598499	1	0.842401501	0.914460285	0.969964151	0.030035849	0.771221532	0.893285372	0.827777778
339	1	0	1	1	1	0.842401501	0.157598499	1	0.842401501	0.914460285	0.969964151	0.030035849	0.771221532	0.893285372	0.827777778
339	1	0	1	1	1	0.842401501	0.157598499	1	0.842401501	0.914460285	0.969964151	0.030035849	0.771221532	0.893285372	0.827777778
339	1	0	1	1	1	0.842401501	0.157598499	1	0.842401501	0.914460285	0.969964151	0.030035849	0.771221532	0.893285372	0.827777778
339	1	0	1	1	1	0.842401501	0.157598499	1	0.842401501	0.914460285	0.969964151	0.030035849	0.771221532	0.893285372	0.827777778
339	1	0	1	1	1	0.842401501	0.157598499	1	0.842401501	0.914460285	0.969964151	0.030035849	0.771221532	0.893285372	0.827777778
339	1	0	1	1	1	0.842401501	0.157598499	1	0.842401501	0.914460285	0.969964151	0.030035849	0.771221532	0.893285372	0.827777778
339	1	0	1	1	1	0.842401501	0.157598499	1	0.842401501	0.914460285	0.969964151	0.030035849	0.771221532	0.893285372	0.827777778
339	1	0	1	1	1	0.842401501	0.157598499	1	0.842401501	0.914460285	0.969964151	0.030035849	0.771221532	0.893285372	0.827777778
339	1	0	1	1	1	0.842401501	0.157598499	1	0.842401501	0.914460285	0.969964151	0.030035849	0.771221532	0.893285372	0.827777778
339	1	0	1	1	1	0.842401501	0.157598499	1	0.842401501	0.914460285	0.969964151	0.030035849	0.771221532	0.893285372	0.827777778
339	1	0	1	1	1	0.842401501	0.157598499	1	0.842401501	0.914460285	0.969964151	0.030035849	0.771221532	0.893285372	0.827777778
339	1	0	1	1	1	0.842401501	0.157598499	1	0.842401501	0.914460285	0.969964151	0.030035849	0.771221532	0.893285372	0.827777778
339	1	0	1	1	1	0.842401501	0.157598499	1	0.842401501	0.914460285	0.969964151	0.030035849	0.771221532	0.893285372	0.827777778
339	1	0	1	1	1	0.842401501	0.157598499	1	0.842401501	0.914460285	0.969964151	0.030035849	0.771221532	0.893285372	0.827777778
339	1	0	1	1	1	0.842401501	0.157598499	1	0.842401501	0.914460285	0.969964151	0.030035849	0.771221532	0.893285372	0.827777778
339	1	0	1	1	1	0.842401501	0.157598499	1	0.842401501	0.914460285	0.969964151	0.030035849	0.771221532	0.893285372	0.827777778
339	1	0	1	1	1	0.842401501	0.157598499	1	0.842401501	0.914460285	0.969964151	0.030035849	0.771221532	0.893285372	0.827777778
339	1	0	1	1	1	0.842401501	0.157598499	1	0.842401501	0.914460285	0.969964151	0.030035849	0.771221532	0.893285372	0.827777778
339	1	0	1	1	1	0.842401501	0.157598499	1	0.842401501	0.914460285	0.969964151	0.030035849	0.771221532	0.893285372	0.827777778
339	1	0	1	1	1	0.842401501	0.157598499	1	0.842401501	0.914460285	0.969964151	0.030035849	0.771221532	0.893285372	0.827777778
339	1	0	1	1	1	0.842401501	0.157598499	1	0.842401501	0.914460285	0.969964151	0.030035849	0.771221532	0.893285372	0.827777778
339	1	0	1	1	1	0.842401501	0.157598499	1	0.842401501	0.914460285	0.969964151	0.030035849	0.771221532	0.893285372	0.827777778
339	1	0	1	1	1	0.842401501	0.157598499	1	0.842401501	0.914460285	0.969964151	0.030035849	0.771221532	0.893285372	0.827777778
339	1	0	1	1	1	0.842401501	0.157598499	1	0.842401501	0.914460285	0.969964151	0.030035849	0.771221532	0.893285372	0.827777778
339	1	0	1	1	1	0.842401501	0.157598499	1	0.842401501	0.914460285	0.969964151	0.030035849	0.771221532	0.893285372	0.827777778
339	1	0	1	1	1	0.842401501	0.157598499	1	0.842401501	0.914460285	0.969964151	0.030035849	0.771221532	0.893285372	0.827777778
339	1	0	1	1	1	0.842401501	0.157598499	1	0.842401501	0.914460285	0.969964151	0.030035849	0.771221532	0.893285372	0.827777778
339	1	0	1	1	1	0.842401501	0.157598499	1	0.842401501	0.914460285	0.969964151	0.030035849	0.771221532	0.893285372	0.827777778
339	1	0	1	1	1	0.842401501	0.157598499	1	0.842401501	0.914460285	0.969964151	0.030035849	0.771221532	0.893285372	0.827777778
339	1	0	1	1	1	0.842401501	0.157598499	1	0.842401501	0.914460285	0.969964151	0.030035849	0.771221532	0.893285372	0.827777778
339	1	0	1	1	1	0.842401501	0.157598499	1	0.842401501	0.914460285	0.969964151	0.030035849	0.771221532	0.893285372	0.827777778
339	1	0	1	1	1	0.842401501	0.157598499	1	0.842401501	0.914460285	0.969964151	0.030035849	0.771221532	0.893285372	0.827777778
339	1	0	1	1	1	0.842401501	0.157598499	1	0.842401501	0.914460285	0.969964151	0.030035849	0.771221532	0.893285372	0.827777778
339	1	0	1	1	1	0.842401501	0.157598499	1	0.842401501	0.914460285	0.969964151	0.030035849	0.771221532	0.893285372	0.827777778
339	1	0	1	1	1	0.842401501	0.157598499	1	0.842401501	0.914460285	0.969964151	0.030035849	0.771221532	0.893285372	0.827777778
339	1	0	1	1	1	0.842401501	0.157598499	1	0.842401501	0.914460285	0.969964151	0.030035849	0.771221532	0.893285372	0.827777778
339	1	0	1	1	1	0.842401501	0.157598499	1	0.842401501	0.914460285	0.969964151	0.030035849	0.771221532	0.893285372	0.827777778
339	1	0	1	1	1	0.842401501	0.157598499	1	0.842401501	0.914460285	0.969964151	0.030035849	0.771221532	0.893285372	0.827777778
339	1	0	1	1	1	0.842401501	0.157598499	1	0.842401501	0.914460285	0.969964151	0.030035849	0.771221532	0.893285372	0.827777778
339	1	0	1	1	1	0.842401501	0.157598499	1	0.842401501	0.914460285	0.969964151	0.030035849	0.771221532	0.893285372	0.827777778
339	1	0	1	1	1	0.842401501	0.157598499	1	0.842401501	0.914460285	0.969964151	0.030035849	0.771221532	0.893285372	0.827777778
339	1	0	1	1	1	0.842401501	0.157598499	1	0.842401501	0.914460285	0.969964151	0.030035849	0.771221532	0.893285372	0.827777778
339	1	0	1	1	1	0.842401501	0.157598499	1	0.842401501	0.914460285	0.969964151	0.030035849	0.771221532	0.893285372	0.827777778
339	1	0	1	1	1	0.842401501	0.157598499	1	0.842401501	0.914460285	0.969964151	0.030035849	0.771221532	0.893285372	0.827777778
339	1	0	1	1	1	0.842401501	0.157598499	1	0.842401501	0.914460285	0.969964151	0.030035849	0.771221532	0.893285372	0.827777778
339	1	0	1	1	1	0.842401501	0.157598499	1	0.842401501	0.914460285	0.969964151	0.030035849	0.771221532	0.893285372	0.827777778
339	1	0	1	1	1	0.842401501	0.157598499	1	0.842401501	0.914460285	0.969964151	0.030035849	0.771221532	0.893285372	0.827777778
339	1	0	1	1	1	0.842401501	0.157598499	1	0.842401501	0.914460285	0.969964151	0.030035849	0.771221532	0.893285372	0.827777778
339	1	0	1	1	1	0.842401501	0.157598499	1	0.842401501	0.914460285	0.969964151	0.030035849	0.771221532	0.893285372	0.827777778
339	1	0	1	1	1	0.842401501	0.157598499	1	0.842401501	0.914460285	0.969964151	0.030035849	0.771221532	0.893285372	0.827777778
339	1	0	1	1	1	0.842401501	0.157598499	1	0.842401501	0.914460285	0.969964151	0.030035849	0.771221532	0.893285372	0.827777778
339	1	0	1	1	1	0.842401501	0.157598499	1	0.842401501	0.914460285	0.969964151	0.030035849	0.771221532	0.893285372	0.827777778
339	1	0	1	1	1	0.842401501	0.157598499	1	0.842401501	0.914460285	0.969964151	0.030035849	0.771221532	0.893285372	0.827777778
339	1	0	1	1	1	0.842401501	0.157598499	1	0.842401501	0.914460285	0.969964151	0.030035849	0.771221532	0.893285372	0.827777778
339	1	0	1	1	1	0.842401501	0.157598499	1	0.842401501	0.914460285	0.969964151	0.030035849	0.771221532	0.893285372	0.827777778
339	1	0	1	1	1	0.842401501	0.157598499	1	0.842401501	0.914460285	0.969964151	0.030035849	0.771221532	0.893285372	0.827777778
339	1	0	1	1	1	0.842401501	0.157598499	1	0.842401501	0.914460285	0.969964151	0.030035849	0.771221532	0.893285372	0.827777778
338	1	0	1	1	1	0.844277674	0.155722326	1	0.844277674	0.915564598	0.969770371	0.030229629	0.769628099	0.893285372	0.826859046
338	1	0	1	1	1	0.844277674	0.155722326	1	0.844277674	0.915564598	0.969770371	0.030229629	0.769628099	0.893285372	0.826859046
338	1	0	1	1	1	0.844277674	0.155722326	1	0.844277674	0.915564598	0.969770371	0.030229629	0.769628099	0.893285372	0.826859046
338	1	0	1	1	1	0.844277674	0.155722326	1	0.844277674	0.915564598	0.969770371	0.030229629	0.769628099	0.893285372	0.826859046
338	1	0	1	1	1	0.844277674	0.155722326	1	0.844277674	0.915564598	0.969770371	0.030229629	0.769628099	0.893285372	0.826859046
338	1	0	1	1	1	0.844277674	0.155722326	1	0.844277674	0.915564598	0.969770371	0.030229629	0.769628099	0.893285372	0.826859046
338	1	0	1	1	1	0.844277674	0.155722326	1	0.844277674	0.915564598	0.969770371	0.030229629	0.769628099	0.893285372	0.826859046
338	1	0	1	1	1	0.844277674	0.155722326	1	0.844277674	0.915564598	0.969770371	0.030229629	0.769628099	0.893285372	0.826859046
338	1	0	1	1	1	0.844277674	0.155722326	1	0.844277674	0.915564598	0.969770371	0.030229629	0.769628099	0.893285372	0.826859046
338	1	0	1	1	1	0.844277674	0.155722326	1	0.844277674	0.915564598	0.969770371	0.030229629	0.769628099	0.893285372	0.826859046
338	1	0	1	1	1	0.844277674	0.155722326	1	0.844277674	0.915564598	0.969770371	0.030229629	0.769628099	0.893285372	0.826859046
338	1	0	1	1	1	0.844277674	0.155722326	1	0.844277674	0.915564598	0.969770371	0.030229629	0.769628099	0.893285372	0.826859046
338	1	0	1	1	1	0.844277674	0.155722326	1	0.844277674	0.915564598	0.969770371	0.030229629	0.769628099	0.893285372	0.826859046
338	1	0	1	1	1	0.844277674	0.155722326	1	0.844277674	0.915564598	0.969770371	0.030229629	0.769628099	0.893285372	0.826859046
338	1	0	1	1	1	0.844277674	0.155722326	1	0.844277674	0.915564598	0.969770371	0.030229629	0.769628099	0.893285372	0.826859046
338	1	0	1	1	1	0.844277674	0.155722326	1	0.844277674	0.915564598	0.969770371	0.030229629	0.769628099	0.893285372	0.826859046
338	1	0	1	1	1	0.844277674	0.155722326	1	0.844277674	0.915564598	0.969770371	0.030229629	0.769628099	0.893285372	0.826859046
338	1	0	1	1	1	0.844277674	0.155722326	1	0.844277674	0.915564598	0.969770371	0.030229629	0.769628099	0.893285372	0.826859046
338	1	0	1	1	1	0.844277674	0.155722326	1	0.844277674	0.915564598	0.969770371	0.030229629	0.769628099	0.893285372	0.826859046
338	1	0	1	1	1	0.844277674	0.155722326	1	0.844277674	0.915564598	0.969770371	0.030229629	0.769628099	0.893285372	0.826859046
338	1	0	1	1	1	0.844277674	0.155722326	1	0.844277674	0.915564598	0.969770371	0.030229629	0.769628099	0.893285372	0.826859046
338	1	0	1	1	1	0.844277674	0.155722326	1	0.844277674	0.915564598	0.969770371	0.030229629	0.769628099	0.893285372	0.826859046
338	1	0	1	1	1	0.844277674	0.155722326	1	0.844277674	0.915564598	0.969770371	0.030229629	0.769628099	0.893285372	0.826859046
338	1	0	1	1	1	0.844277674	0.155722326	1	0.844277674	0.915564598	0.969770371	0.030229629	0.769628099	0.893285372	0.826859046
338	1	0	1	1	1	0.844277674	0.155722326	1	0.844277674	0.915564598	0.969770371	0.030229629	0.769628099	0.893285372	0.826859046
338	1	0	1	1	1	0.844277674	0.155722326	1	0.844277674	0.915564598	0.969770371	0.030229629	0.769628099	0.893285372	0.826859046
338	1	0	1	1	1	0.844277674	0.155722326	1	0.844277674	0.915564598	0.969770371	0.030229629	0.769628099	0.893285372	0.826859046
338	1	0	1	1	1	0.844277674	0.155722326	1	0.844277674	0.915564598	0.969770371	0.030229629	0.769628099	0.893285372	0.826859046
338	1	0	1	1	1	0.844277674	0.155722326	1	0.844277674	0.915564598	0.969770371	0.030229629	0.769628099	0.893285372	0.826859046
338	1	0	1	1	1	0.844277674	0.155722326	1	0.844277674	0.915564598	0.969770371	0.030229629	0.769628099	0.893285372	0.826859046
338	1	0	1	1	1	0.844277674	0.155722326	1	0.844277674	0.915564598	0.969770371	0.030229629	0.769628099	0.893285372	0.826859046
338	1	0	1	1	1	0.844277674	0.155722326	1	0.844277674	0.915564598	0.969770371	0.030229629	0.769628099	0.893285372	0.826859046
338	1	0	1	1	1	0.844277674	0.155722326	1	0.844277674	0.915564598	0.969770371	0.030229629	0.769628099	0.893285372	0.826859046
338	1	0	1	1	1	0.844277674	0.155722326	1	0.844277674	0.915564598	0.969770371	0.030229629	0.769628099	0.893285372	0.826859046
338	1	0	1	1	1	0.844277674	0.155722326	1	0.844277674	0.915564598	0.969770371	0.030229629	0.769628099	0.893285372	0.826859046
338	1	0	1	1	1	0.844277674	0.155722326	1	0.844277674	0.915564598	0.969770371	0.030229629	0.769628099	0.893285372	0.826859046
338	1	0	1	1	1	0.844277674	0.155722326	1	0.844277674	0.915564598	0.969770371	0.030229629	0.769628099	0.893285372	0.826859046
338	1	0	1	1	1	0.844277674	0.155722326	1	0.844277674	0.915564598	0.969770371	0.030229629	0.769628099	0.893285372	0.826859046
337	1	0	1	1	1	0.844277674	0.155722326	1	0.844277674	0.915564598	0.969770371	0.030229629	0.769628099	0.893285372	0.826859046
337	1	0	1	1	1	0.844277674	0.155722326	1	0.844277674	0.915564598	0.969770371	0.030229629	0.769628099	0.893285372	0.826859046
337	1	0	1	1	1	0.844277674	0.155722326	1	0.844277674	0.915564598	0.969770371	0.030229629	0.769628099	0.893285372	0.826859046
337	1	0	1	1	1	0.844277674	0.155722326	1	0.844277674	0.915564598	0.969770371	0.030229629	0.769628099	0.893285372	0.826859046
337	1	0	1	1	1	0.844277674	0.155722326	1	0.844277674	0.915564598	0.969770371	0.030229629	0.769628099	0.893285372	0.826859046
337	1	0	1	1	1	0.844277674	0.155722326	1	0.844277674	0.915564598	0.969770371	0.030229629	0.769628099	0.893285372	0.826859046
337	1	0	1	1	1	0.844277674	0.155722326	1	0.844277674	0.915564598	0.969770371	0.030229629	0.769628099	0.893285372	0.826859046
337	1	0	1	1	1	0.844277674	0.155722326	1	0.844277674	0.915564598	0.969770371	0.030229629	0.769628099	0.893285372	0.826859046
337	1	0	1	1	1	0.844277674	0.155722326	1	0.844277674	0.915564598	0.969770371	0.030229629	0.769628099	0.893285372	0.826859046
337	1	0	1	1	1	0.844277674	0.155722326	1	0.844277674	0.915564598	0.969770371	0.030229629	0.769628099	0.893285372	0.826859046
337	1	0	1	1	1	0.844277674	0.155722326	1	0.844277674	0.915564598	0.969770371	0.030229629	0.769628099	0.893285372	0.826859046
337	1	0	1	1	1	0.844277674	0.155722326	1	0.844277674	0.915564598	0.969770371	0.030229629	0.769628099	0.893285372	0.826859046
337	1	0	1	1	1	0.844277674	0.155722326	1	0.844277674	0.915564598	0.969770371	0.030229629	0.769628099	0.893285372	0.826859046
337	1	0	1	1	1	0.844277674	0.155722326	1	0.844277674	0.915564598	0.969770371	0.030229629	0.769628099	0.893285372	0.826859046
337	1	0	1	1	1	0.844277674	0.155722326	1	0.844277674	0.915564598	0.969770371	0.030229629	0.769628099	0.893285372	0.826859046
337	1	0	1	1	1	0.844277674	0.155722326	1	0.844277674	0.915564598	0.969770371	0.030229629	0.769628099	0.893285372	0.826859046
337	1	0	1	1	1	0.844277674	0.155722326	1	0.844277674	0.915564598	0.969770371	0.030229629	0.769628099	0.893285372	0.826859046
337	1	0	1	1	1	0.844277674	0.155722326	1	0.844277674	0.915564598	0.969770371	0.030229629	0.769628099	0.893285372	0.826859046
337	1	0	1	1	1	0.844277674	0.155722326	1	0.844277674	0.915564598	0.969770371	0.030229629	0.769628099	0.893285372	0.826859046
337	1	0	1	1	1	0.844277674	0.155722326	1	0.844277674	0.915564598	0.969770371	0.030229629	0.769628099	0.893285372	0.826859046
336	1	0	1	1	1	0.844277674	0.155722326	1	0.844277674	0.915564598	0.969770371	0.030229629	0.769628099	0.893285372	0.826859046
336	1	0	1	1	1	0.844277674	0.155722326	1	0.844277674	0.915564598	0.969770371	0.030229629	0.769628099	0.893285372	0.826859046
335	1	0	1	1	1	0.844277674	0.155722326	1	0.844277674	0.915564598	0.969770371	0.030229629	0.769628099	0.893285372	0.826859046
335	1	0	1	1	1	0.844277674	0.155722326	1	0.844277674	0.915564598	0.969770371	0.030229629	0.769628099	0.893285372	0.826859046
335	1	0	1	1	1	0.844277674	0.155722326	1	0.844277674	0.915564598	0.969770371	0.030229629	0.769628099	0.893285372	0.826859046
335	1	0	1	1	1	0.844277674	0.155722326	1	0.844277674	0.915564598	0.969770371	0.030229629	0.769628099	0.893285372	0.826859046
335	1	0	1	1	1	0.844277674	0.155722326	1	0.844277674	0.915564598	0.969770371	0.030229629	0.769628099	0.893285372	0.826859046
335	1	0	1	1	1	0.844277674	0.155722326	1	0.844277674	0.915564598	0.969770371	0.030229629	0.769628099	0.893285372	0.826859046
335	1	0	1	1	1	0.844277674	0.155722326	1	0.844277674	0.915564598	0.969770371	0.030229629	0.769628099	0.893285372	0.826859046
335	1	0	1	1	1	0.844277674	0.155722326	1	0.844277674	0.915564598	0.969770371	0.030229629	0.769628099	0.893285372	0.826859046
335	1	0	1	1	1	0.844277674	0.155722326	1	0.844277674	0.915564598	0.969770371	0.030229629	0.769628099	0.893285372	0.826859046
335	1	0	1	1	1	0.844277674	0.155722326	1	0.844277674	0.915564598	0.969770371	0.030229629	0.769628099	0.893285372	0.826859046
335	1	0	1	1	1	0.844277674	0.155722326	1	0.844277674	0.915564598	0.969770371	0.030229629	0.769628099	0.893285372	0.826859046
335	1	0	1	1	1	0.844277674	0.155722326	1	0.844277674	0.915564598	0.969770371	0.030229629	0.769628099	0.893285372	0.826859046
335	1	0	1	1	1	0.844277674	0.155722326	1	0.844277674	0.915564598	0.969770371	0.030229629	0.769628099	0.893285372	0.826859046
335	1	0	1	1	1	0.844277674	0.155722326	1	0.844277674	0.915564598	0.969770371	0.030229629	0.769628099	0.893285372	0.826859046
335	1	0	1	1	1	0.844277674	0.155722326	1	0.844277674	0.915564598	0.969770371	0.030229629	0.769628099	0.893285372	0.826859046
335	1	0	1	1	1	0.844277674	0.155722326	1	0.844277674	0.915564598	0.969770371	0.030229629	0.769628099	0.893285372	0.826859046
335	1	0	1	1	1	0.844277674	0.155722326	1	0.844277674	0.915564598	0.969770371	0.030229629	0.769628099	0.893285372	0.826859046
335	1	0	1	1	1	0.844277674	0.155722326	1	0.844277674	0.915564598	0.969770371	0.030229629	0.769628099	0.893285372	0.826859046
335	1	0	1	1	1	0.844277674	0.155722326	1	0.844277674	0.915564598	0.969770371	0.030229629	0.769628099	0.893285372	0.826859046
335	1	0	1	1	1	0.844277674	0.155722326	1	0.844277674	0.915564598	0.969770371	0.030229629	0.769628099	0.893285372	0.826859046
335	1	0	1	1	1	0.844277674	0.155722326	1	0.844277674	0.915564598	0.969770371	0.030229629	0.769628099	0.893285372	0.826859046
335	1	0	1	1	1	0.844277674	0.155722326	1	0.844277674	0.915564598	0.969770371	0.030229629	0.769628099	0.893285372	0.826859046
335	1	0	1	1	1	0.844277674	0.155722326	1	0.844277674	0.915564598	0.969770371	0.030229629	0.769628099	0.893285372	0.826859046
335	1	0	1	1	1	0.844277674	0.155722326	1	0.844277674	0.915564598	0.969770371	0.030229629	0.769628099	0.893285372	0.826859046
335	1	0	1	1	1	0.844277674	0.155722326	1	0.844277674	0.915564598	0.969770371	0.030229629	0.769628099	0.893285372	0.826859046
335	1	0	1	1	1	0.844277674	0.155722326	1	0.844277674	0.915564598	0.969770371	0.030229629	0.769628099	0.893285372	0.826859046
335	1	0	1	1	1	0.844277674	0.155722326	1	0.844277674	0.915564598	0.969770371	0.030229629	0.769628099	0.893285372	0.826859046
335	1	0	1	1	1	0.844277674	0.155722326	1	0.844277674	0.915564598	0.969770371	0.030229629	0.769628099	0.893285372	0.826859046
335	1	0	1	1	1	0.844277674	0.155722326	1	0.844277674	0.915564598	0.969770371	0.030229629	0.769628099	0.893285372	0.826859046
335	1	0	1	1	1	0.844277674	0.155722326	1	0.844277674	0.915564598	0.969770371	0.030229629	0.769628099	0.893285372	0.826859046
335	1	0	1	1	1	0.844277674	0.155722326	1	0.844277674	0.915564598	0.969770371	0.030229629	0.769628099	0.893285372	0.826859046
335	1	0	1	1	1	0.844277674	0.155722326	1	0.844277674	0.915564598	0.969770371	0.030229629	0.769628099	0.893285372	0.826859046
335	1	0	1	1	1	0.844277674	0.155722326	1	0.844277674	0.915564598	0.969770371	0.030229629	0.769628099	0.893285372	0.826859046
335	1	0	1	1	1	0.844277674	0.155722326	1	0.844277674	0.915564598	0.969770371	0.030229629	0.769628099	0.893285372	0.826859046
335	1	0	1	1	1	0.844277674	0.155722326	1	0.844277674	0.915564598	0.969770371	0.030229629	0.769628099	0.893285372	0.826859046
335	1	0	1	1	1	0.844277674	0.155722326	1	0.844277674	0.915564598	0.969770371	0.030229629	0.769628099	0.893285372	0.826859046
335	1	0	1	1	1	0.844277674	0.155722326	1	0.844277674	0.915564598	0.969770371	0.030229629	0.769628099	0.893285372	0.826859046
335	1	0	1	1	1	0.844277674	0.155722326	1	0.844277674	0.915564598	0.969770371	0.030229629	0.769628099	0.893285372	0.826859046
335	1	0	1	1	1	0.844277674	0.155722326	1	0.844277674	0.915564598	0.969770371	0.030229629	0.769628099	0.893285372	0.826859046
335	1	0	1	1	1	0.844277674	0.155722326	1	0.844277674	0.915564598	0.969770371	0.030229629	0.769628099	0.893285372	0.826859046
335	1	0	1	1	1	0.844277674	0.155722326	1	0.844277674	0.915564598	0.969770371	0.030229629	0.769628099	0.893285372	0.826859046
335	1	0	1	1	1	0.844277674	0.155722326	1	0.844277674	0.915564598	0.969770371	0.030229629	0.769628099	0.893285372	0.826859046
335	1	0	1	1	1	0.844277674	0.155722326	1	0.844277674	0.915564598	0.969770371	0.030229629	0.769628099	0.893285372	0.826859046
335	1	0	1	1	1	0.844277674	0.155722326	1	0.844277674	0.915564598	0.969770371	0.030229629	0.769628099	0.893285372	0.826859046
335	1	0	1	1	1	0.844277674	0.155722326	1	0.844277674	0.915564598	0.969770371	0.030229629	0.769628099	0.893285372	0.826859046
335	1	0	1	1	1	0.844277674	0.155722326	1	0.844277674	0.915564598	0.969770371	0.030229629	0.769628099	0.893285372	0.826859046
335	1	0	1	1	1	0.844277674	0.155722326	1	0.844277674	0.915564598	0.969770371	0.030229629	0.769628099	0.893285372	0.826859046
335	1	0	1	1	1	0.844277674	0.155722326	1	0.844277674	0.915564598	0.969770371	0.030229629	0.769628099	0.893285372	0.826859046
335	1	0	1	1	1	0.844277674	0.155722326	1	0.844277674	0.915564598	0.969770371	0.030229629	0.769628099	0.893285372	0.826859046
335	1	0	1	1	1	0.844277674	0.155722326	1	0.844277674	0.915564598	0.969770371	0.030229629	0.769628099	0.893285372	0.826859046
335	1	0	1	1	1	0.844277674	0.155722326	1	0.844277674	0.915564598	0.969770371	0.030229629	0.769628099	0.893285372	0.826859046
335	1	0	1	1	1	0.844277674	0.155722326	1	0.844277674	0.915564598	0.969770371	0.030229629	0.769628099	0.893285372	0.826859046
335	1	0	1	1	1	0.844277674	0.155722326	1	0.844277674	0.915564598	0.969770371	0.030229629	0.769628099	0.893285372	0.826859046
335	1	0	1	1	1	0.844277674	0.155722326	1	0.844277674	0.915564598	0.969770371	0.030229629	0.769628099	0.893285372	0.826859046
335	1	0	1	1	1	0.844277674	0.155722326	1	0.844277674	0.915564598	0.969770371	0.030229629	0.769628099	0.893285372	0.826859046
335	1	0	1	1	1	0.844277674	0.155722326	1	0.844277674	0.915564598	0.969770371	0.030229629	0.769628099	0.893285372	0.826859046
335	1	0	1	1	1	0.844277674	0.155722326	1	0.844277674	0.915564598	0.969770371	0.030229629	0.769628099	0.893285372	0.826859046
335	1	0	1	1	1	0.844277674	0.155722326	1	0.844277674	0.915564598	0.969770371	0.030229629	0.769628099	0.893285372	0.826859046
335	1	0	1	1	1	0.844277674	0.155722326	1	0.844277674	0.915564598	0.969770371	0.030229629	0.769628099	0.893285372	0.826859046
335	1	0	1	1	1	0.844277674	0.155722326	1	0.844277674	0.915564598	0.969770371	0.030229629	0.769628099	0.893285372	0.826859046
335	1	0	1	1	1	0.844277674	0.155722326	1	0.844277674	0.915564598	0.969770371	0.030229629	0.769628099	0.893285372	0.826859046
335	1	0	1	1	1	0.844277674	0.155722326	1	0.844277674	0.915564598	0.969770371	0.030229629	0.769628099	0.893285372	0.826859046
335	1	0	1	1	1	0.844277674	0.155722326	1	0.844277674	0.915564598	0.969770371	0.030229629	0.769628099	0.893285372	0.826859046
335	1	0	1	1	1	0.844277674	0.155722326	1	0.844277674	0.915564598	0.969770371	0.030229629	0.769628099	0.893285372	0.826859046
335	1	0	1	1	1	0.844277674	0.155722326	1	0.844277674	0.915564598	0.969770371	0.030229629	0.769628099	0.893285372	0.826859046
335	1	0	1	1	1	0.844277674	0.155722326	1	0.844277674	0.915564598	0.969770371	0.030229629	0.769628099	0.893285372	0.826859046
335	1	0	1	1	1	0.844277674	0.155722326	1	0.844277674	0.915564598	0.969770371	0.030229629	0.769628099	0.893285372	0.826859046
335	1	0	1	1	1	0.844277674	0.155722326	1	0.844277674	0.915564598	0.969770371	0.030229629	0.769628099	0.893285372	0.826859046
335	1	0	1	1	1	0.844277674	0.155722326	1	0.844277674	0.915564598	0.969770371	0.030229629	0.769628099	0.893285372	0.826859046
335	1	0	1	1	1	0.844277674	0.155722326	1	0.844277674	0.915564598	0.969770371	0.030229629	0.769628099	0.893285372	0.826859046
335	1	0	1	1	1	0.844277674	0.155722326	1	0.844277674	0.915564598	0.969770371	0.030229629	0.769628099	0.893285372	0.826859046
335	1	0	1	1	1	0.844277674	0.155722326	1	0.844277674	0.915564598	0.969770371	0.030229629	0.769628099	0.893285372	0.826859046
335	1	0	1	1	1	0.844277674	0.155722326	1	0.844277674	0.915564598	0.969770371	0.030229629	0.769628099	0.893285372	0.826859046
335	1	0	1	1	1	0.844277674	0.155722326	1	0.844277674	0.915564598	0.969770371	0.030229629	0.769628099	0.893285372	0.826859046
335	1	0	1	1	1	0.844277674	0.155722326	1	0.844277674	0.915564598	0.969770371	0.030229629	0.769628099	0.893285372	0.826859046
335	1	0	1	1	1	0.844277674	0.155722326	1	0.844277674	0.915564598	0.969770371	0.030229629	0.769628099	0.893285372	0.826859046
335	1	0	1	1	1	0.844277674	0.155722326	1	0.844277674	0.915564598	0.969770371	0.030229629	0.769628099	0.893285372	0.826859046
335	1	0	1	1	1	0.844277674	0.155722326	1	0.844277674	0.915564598	0.969770371	0.030229629	0.769628099	0.893285372	0.826859046
335	1	0	1	1	1	0.844277674	0.155722326	1	0.844277674	0.915564598	0.969770371	0.030229629	0.769628099	0.893285372	0.826859046
335	1	0	1	1	1	0.844277674	0.155722326	1	0.844277674	0.915564598	0.969770371	0.030229629	0.769628099	0.893285372	0.826859046
335	1	0	1	1	1	0.844277674	0.155722326	1	0.844277674	0.915564598	0.969770371	0.030229629	0.769628099	0.893285372	0.826859046
335	1	0	1	1	1	0.844277674	0.155722326	1	0.844277674	0.915564598	0.969770371	0.030229629	0.769628099	0.893285372	0.826859046
335	1	0	1	1	1	0.844277674	0.155722326	1	0.844277674	0.915564598	0.969770371	0.030229629	0.769628099	0.893285372	0.826859046
335	1	0	1	1	1	0.844277674	0.155722326	1	0.844277674	0.915564598	0.969770371	0.030229629	0.769628099	0.893285372	0.826859046
334	1	0	1	1	1	0.844277674	0.155722326	1	0.844277674	0.915564598	0.969770371	0.030229629	0.769628099	0.893285372	0.826859046
334	1	0	1	1	1	0.844277674	0.155722326	1	0.844277674	0.915564598	0.969770371	0.030229629	0.769628099	0.893285372	0.826859046
334	1	0	1	1	1	0.844277674	0.155722326	1	0.844277674	0.915564598	0.969770371	0.030229629	0.769628099	0.893285372	0.826859046
334	1	0	1	1	1	0.844277674	0.155722326	1	0.844277674	0.915564598	0.969770371	0.030229629	0.769628099	0.893285372	0.826859046
334	1	0	1	1	1	0.844277674	0.155722326	1	0.844277674	0.915564598	0.969770371	0.030229629	0.769628099	0.893285372	0.826859046
334	1	0	1	1	1	0.844277674	0.155722326	1	0.844277674	0.915564598	0.969770371	0.030229629	0.769628099	0.893285372	0.826859046
334	1	0	1	1	1	0.844277674	0.155722326	1	0.844277674	0.915564598	0.969770371	0.030229629	0.769628099	0.893285372	0.826859046
334	1	0	1	1	1	0.844277674	0.155722326	1	0.844277674	0.915564598	0.969770371	0.030229629	0.769628099	0.893285372	0.826859046
334	1	0	1	1	1	0.844277674	0.155722326	1	0.844277674	0.915564598	0.969770371	0.030229629	0.769628099	0.893285372	0.826859046
334	1	0	1	1	1	0.844277674	0.155722326	1	0.844277674	0.915564598	0.969770371	0.030229629	0.769628099	0.893285372	0.826859046
334	1	0	1	1	1	0.844277674	0.155722326	1	0.844277674	0.915564598	0.969770371	0.030229629	0.769628099	0.893285372	0.826859046
334	1	0	1	1	1	0.844277674	0.155722326	1	0.844277674	0.915564598	0.969770371	0.030229629	0.769628099	0.893285372	0.826859046
334	1	0	1	1	1	0.844277674	0.155722326	1	0.844277674	0.915564598	0.969770371	0.030229629	0.769628099	0.893285372	0.826859046
334	1	0	1	1	1	0.844277674	0.155722326	1	0.844277674	0.915564598	0.969770371	0.030229629	0.769628099	0.893285372	0.826859046
334	1	0	1	1	1	0.844277674	0.155722326	1	0.844277674	0.915564598	0.969770371	0.030229629	0.769628099	0.893285372	0.826859046
334	1	0	1	1	1	0.844277674	0.155722326	1	0.844277674	0.915564598	0.969770371	0.030229629	0.769628099	0.893285372	0.826859046
334	1	0	1	1	1	0.844277674	0.155722326	1	0.844277674	0.915564598	0.969770371	0.030229629	0.769628099	0.893285372	0.826859046
334	1	0	1	1	1	0.844277674	0.155722326	1	0.844277674	0.915564598	0.969770371	0.030229629	0.769628099	0.893285372	0.826859046
334	1	0	1	1	1	0.844277674	0.155722326	1	0.844277674	0.915564598	0.969770371	0.030229629	0.769628099	0.893285372	0.826859046
334	1	0	1	1	1	0.844277674	0.155722326	1	0.844277674	0.915564598	0.969770371	0.030229629	0.769628099	0.893285372	0.826859046
334	1	0	1	1	1	0.844277674	0.155722326	1	0.844277674	0.915564598	0.969770371	0.030229629	0.769628099	0.893285372	0.826859046
334	1	0	1	1	1	0.844277674	0.155722326	1	0.844277674	0.915564598	0.969770371	0.030229629	0.769628099	0.893285372	0.826859046
334	1	0	1	1	1	0.844277674	0.155722326	1	0.844277674	0.915564598	0.969770371	0.030229629	0.769628099	0.893285372	0.826859046
334	1	0	1	1	1	0.844277674	0.155722326	1	0.844277674	0.915564598	0.969770371	0.030229629	0.769628099	0.893285372	0.826859046
334	1	0	1	1	1	0.844277674	0.155722326	1	0.844277674	0.915564598	0.969770371	0.030229629	0.769628099	0.893285372	0.826859046
334	1	0	1	1	1	0.844277674	0.155722326	1	0.844277674	0.915564598	0.969770371	0.030229629	0.769628099	0.893285372	0.826859046
334	1	0	1	1	1	0.844277674	0.155722326	1	0.844277674	0.915564598	0.969770371	0.030229629	0.769628099	0.893285372	0.826859046
334	1	0	1	1	1	0.844277674	0.155722326	1	0.844277674	0.915564598	0.969770371	0.030229629	0.769628099	0.893285372	0.826859046
334	1	0	1	1	1	0.844277674	0.155722326	1	0.844277674	0.915564598	0.969770371	0.030229629	0.769628099	0.893285372	0.826859046
334	1	0	1	1	1	0.844277674	0.155722326	1	0.844277674	0.915564598	0.969770371	0.030229629	0.769628099	0.893285372	0.826859046
334	1	0	1	1	1	0.844277674	0.155722326	1	0.844277674	0.915564598	0.969770371	0.030229629	0.769628099	0.893285372	0.826859046
334	1	0	1	1	1	0.844277674	0.155722326	1	0.844277674	0.915564598	0.969770371	0.030229629	0.769628099	0.893285372	0.826859046
334	1	0	1	1	1	0.844277674	0.155722326	1	0.844277674	0.915564598	0.969770371	0.030229629	0.769628099	0.893285372	0.826859046
334	1	0	1	1	1	0.844277674	0.155722326	1	0.844277674	0.915564598	0.969770371	0.030229629	0.769628099	0.893285372	0.826859046
334	1	0	1	1	1	0.844277674	0.155722326	1	0.844277674	0.915564598	0.969770371	0.030229629	0.769628099	0.893285372	0.826859046
334	1	0	1	1	1	0.844277674	0.155722326	1	0.844277674	0.915564598	0.969770371	0.030229629	0.769628099	0.893285372	0.826859046
333	1	0	1	1	1	0.844277674	0.155722326	1	0.844277674	0.915564598	0.969770371	0.030229629	0.769628099	0.893285372	0.826859046
333	1	0	1	1	1	0.844277674	0.155722326	1	0.844277674	0.915564598	0.969770371	0.030229629	0.769628099	0.893285372	0.826859046
333	1	0	1	1	1	0.844277674	0.155722326	1	0.844277674	0.915564598	0.969770371	0.030229629	0.769628099	0.893285372	0.826859046
332	1	0	1	1	1	0.842990654	0.157009346	1	0.842990654	0.914807302	0.970152147	0.029847853	0.771221532	0.895432692	0.828698554
332	1	0	1	1	1	0.842990654	0.157009346	1	0.842990654	0.914807302	0.970152147	0.029847853	0.771221532	0.895432692	0.828698554
332	1	0	1	1	1	0.842990654	0.157009346	1	0.842990654	0.914807302	0.970152147	0.029847853	0.771221532	0.895432692	0.828698554
332	1	0	1	1	1	0.842990654	0.157009346	1	0.842990654	0.914807302	0.970152147	0.029847853	0.771221532	0.895432692	0.828698554
331	1	0	1	1	1	0.842990654	0.157009346	1	0.842990654	0.914807302	0.970152147	0.029847853	0.771221532	0.895432692	0.828698554
331	1	0	1	1	1	0.842990654	0.157009346	1	0.842990654	0.914807302	0.970152147	0.029847853	0.771221532	0.895432692	0.828698554
331	1	0	1	1	1	0.842990654	0.157009346	1	0.842990654	0.914807302	0.970152147	0.029847853	0.771221532	0.895432692	0.828698554
331	1	0	1	1	1	0.842990654	0.157009346	1	0.842990654	0.914807302	0.970152147	0.029847853	0.771221532	0.895432692	0.828698554
331	1	0	1	1	1	0.842990654	0.157009346	1	0.842990654	0.914807302	0.970152147	0.029847853	0.771221532	0.895432692	0.828698554
331	1	0	1	1	1	0.842990654	0.157009346	1	0.842990654	0.914807302	0.970152147	0.029847853	0.771221532	0.895432692	0.828698554
331	1	0	1	1	1	0.842990654	0.157009346	1	0.842990654	0.914807302	0.970152147	0.029847853	0.771221532	0.895432692	0.828698554
331	1	0	1	1	1	0.842990654	0.157009346	1	0.842990654	0.914807302	0.970152147	0.029847853	0.771221532	0.895432692	0.828698554
331	1	0	1	1	1	0.842990654	0.157009346	1	0.842990654	0.914807302	0.970152147	0.029847853	0.771221532	0.895432692	0.828698554
331	1	0	1	1	1	0.842990654	0.157009346	1	0.842990654	0.914807302	0.970152147	0.029847853	0.771221532	0.895432692	0.828698554
331	1	0	1	1	1	0.842990654	0.157009346	1	0.842990654	0.914807302	0.970152147	0.029847853	0.771221532	0.895432692	0.828698554
331	1	0	1	1	1	0.842990654	0.157009346	1	0.842990654	0.914807302	0.970152147	0.029847853	0.771221532	0.895432692	0.828698554
331	1	0	1	1	1	0.842990654	0.157009346	1	0.842990654	0.914807302	0.970152147	0.029847853	0.771221532	0.895432692	0.828698554
331	1	0	1	1	1	0.842990654	0.157009346	1	0.842990654	0.914807302	0.970152147	0.029847853	0.771221532	0.895432692	0.828698554
331	1	0	1	1	1	0.842990654	0.157009346	1	0.842990654	0.914807302	0.970152147	0.029847853	0.771221532	0.895432692	0.828698554
331	1	0	1	1	1	0.842990654	0.157009346	1	0.842990654	0.914807302	0.970152147	0.029847853	0.771221532	0.895432692	0.828698554
331	1	0	1	1	1	0.842990654	0.157009346	1	0.842990654	0.914807302	0.970152147	0.029847853	0.771221532	0.895432692	0.828698554
331	1	0	1	1	1	0.842990654	0.157009346	1	0.842990654	0.914807302	0.970152147	0.029847853	0.771221532	0.895432692	0.828698554
331	1	0	1	1	1	0.842990654	0.157009346	1	0.842990654	0.914807302	0.970152147	0.029847853	0.771221532	0.895432692	0.828698554
331	1	0	1	1	1	0.842990654	0.157009346	1	0.842990654	0.914807302	0.970152147	0.029847853	0.771221532	0.895432692	0.828698554
330	1	0	1	1	1	0.841713222	0.158286778	1	0.841713222	0.914054601	0.970243288	0.029756712	0.768756423	0.901204819	0.829728231
329	1	0	1	1	1	0.841713222	0.158286778	1	0.841713222	0.914054601	0.970243288	0.029756712	0.768756423	0.901204819	0.829728231
329	1	0	1	1	1	0.841713222	0.158286778	1	0.841713222	0.914054601	0.970243288	0.029756712	0.768756423	0.901204819	0.829728231
328	1	0	1	1	1	0.841713222	0.158286778	1	0.841713222	0.914054601	0.970243288	0.029756712	0.768756423	0.901204819	0.829728231
328	1	0	1	1	1	0.841713222	0.158286778	1	0.841713222	0.914054601	0.970243288	0.029756712	0.768756423	0.901204819	0.829728231
327	1	0	1	1	1	0.841713222	0.158286778	1	0.841713222	0.914054601	0.970243288	0.029756712	0.768756423	0.901204819	0.829728231
327	1	0	1	1	1	0.841713222	0.158286778	1	0.841713222	0.914054601	0.970243288	0.029756712	0.768756423	0.901204819	0.829728231
327	1	0	1	1	1	0.841713222	0.158286778	1	0.841713222	0.914054601	0.970243288	0.029756712	0.768756423	0.901204819	0.829728231
327	1	0	1	1	1	0.841713222	0.158286778	1	0.841713222	0.914054601	0.970243288	0.029756712	0.768756423	0.901204819	0.829728231
327	1	0	1	1	1	0.841713222	0.158286778	1	0.841713222	0.914054601	0.970243288	0.029756712	0.768756423	0.901204819	0.829728231
327	1	0	1	1	1	0.841713222	0.158286778	1	0.841713222	0.914054601	0.970243288	0.029756712	0.768756423	0.901204819	0.829728231
327	1	0	1	1	1	0.841713222	0.158286778	1	0.841713222	0.914054601	0.970243288	0.029756712	0.768756423	0.901204819	0.829728231
327	1	0	1	1	1	0.841713222	0.158286778	1	0.841713222	0.914054601	0.970243288	0.029756712	0.768756423	0.901204819	0.829728231
327	1	0	1	1	1	0.841713222	0.158286778	1	0.841713222	0.914054601	0.970243288	0.029756712	0.768756423	0.901204819	0.829728231
326	1	0	1	1	1	0.841713222	0.158286778	1	0.841713222	0.914054601	0.970243288	0.029756712	0.768756423	0.901204819	0.829728231
326	1	0	1	1	1	0.841713222	0.158286778	1	0.841713222	0.914054601	0.970243288	0.029756712	0.768756423	0.901204819	0.829728231
326	1	0	1	1	1	0.841713222	0.158286778	1	0.841713222	0.914054601	0.970243288	0.029756712	0.768756423	0.901204819	0.829728231
326	1	0	1	1	1	0.841713222	0.158286778	1	0.841713222	0.914054601	0.970243288	0.029756712	0.768756423	0.901204819	0.829728231
326	1	0	1	1	1	0.841713222	0.158286778	1	0.841713222	0.914054601	0.970243288	0.029756712	0.768756423	0.901204819	0.829728231
326	1	0	1	1	1	0.841713222	0.158286778	1	0.841713222	0.914054601	0.970243288	0.029756712	0.768756423	0.901204819	0.829728231
326	1	0	1	1	1	0.841713222	0.158286778	1	0.841713222	0.914054601	0.970243288	0.029756712	0.768756423	0.901204819	0.829728231
326	1	0	1	1	1	0.841713222	0.158286778	1	0.841713222	0.914054601	0.970243288	0.029756712	0.768756423	0.901204819	0.829728231
325	1	0	1	1	1	0.849264706	0.150735294	1	0.849264706	0.918489066	0.969544132	0.030455868	0.7604913	0.902794654	0.825555556
325	1	0	1	1	1	0.849264706	0.150735294	1	0.849264706	0.918489066	0.969544132	0.030455868	0.7604913	0.902794654	0.825555556
324	1	0	1	1	1	0.850828729	0.149171271	1	0.850828729	0.919402985	0.969547086	0.030452914	0.760736196	0.902912621	0.825749168
324	1	0	1	1	1	0.850828729	0.149171271	1	0.850828729	0.919402985	0.969547086	0.030452914	0.760736196	0.902912621	0.825749168
324	1	0	1	1	1	0.850828729	0.149171271	1	0.850828729	0.919402985	0.969547086	0.030452914	0.760736196	0.902912621	0.825749168
324	1	0	1	1	1	0.850828729	0.149171271	1	0.850828729	0.919402985	0.969547086	0.030452914	0.760736196	0.902912621	0.825749168
324	1	0	1	1	1	0.850828729	0.149171271	1	0.850828729	0.919402985	0.969547086	0.030452914	0.760736196	0.902912621	0.825749168
324	1	0	1	1	1	0.850828729	0.149171271	1	0.850828729	0.919402985	0.969547086	0.030452914	0.760736196	0.902912621	0.825749168
324	1	0	1	1	1	0.850828729	0.149171271	1	0.850828729	0.919402985	0.969547086	0.030452914	0.760736196	0.902912621	0.825749168
324	1	0	1	1	1	0.850828729	0.149171271	1	0.850828729	0.919402985	0.969547086	0.030452914	0.760736196	0.902912621	0.825749168
324	1	0	1	1	1	0.850828729	0.149171271	1	0.850828729	0.919402985	0.969547086	0.030452914	0.760736196	0.902912621	0.825749168
324	1	0	1	1	1	0.850828729	0.149171271	1	0.850828729	0.919402985	0.969547086	0.030452914	0.760736196	0.902912621	0.825749168
324	1	0	1	1	1	0.850828729	0.149171271	1	0.850828729	0.919402985	0.969547086	0.030452914	0.760736196	0.902912621	0.825749168
324	1	0	1	1	1	0.850828729	0.149171271	1	0.850828729	0.919402985	0.969547086	0.030452914	0.760736196	0.902912621	0.825749168
324	1	0	1	1	1	0.850828729	0.149171271	1	0.850828729	0.919402985	0.969547086	0.030452914	0.760736196	0.902912621	0.825749168
324	1	0	1	1	1	0.850828729	0.149171271	1	0.850828729	0.919402985	0.969547086	0.030452914	0.760736196	0.902912621	0.825749168
324	1	0	1	1	1	0.850828729	0.149171271	1	0.850828729	0.919402985	0.969547086	0.030452914	0.760736196	0.902912621	0.825749168
324	1	0	1	1	1	0.850828729	0.149171271	1	0.850828729	0.919402985	0.969547086	0.030452914	0.760736196	0.902912621	0.825749168
324	1	0	1	1	1	0.850828729	0.149171271	1	0.850828729	0.919402985	0.969547086	0.030452914	0.760736196	0.902912621	0.825749168
324	1	0	1	1	1	0.850828729	0.149171271	1	0.850828729	0.919402985	0.969547086	0.030452914	0.760736196	0.902912621	0.825749168
324	1	0	1	1	1	0.850828729	0.149171271	1	0.850828729	0.919402985	0.969547086	0.030452914	0.760736196	0.902912621	0.825749168
324	1	0	1	1	1	0.850828729	0.149171271	1	0.850828729	0.919402985	0.969547086	0.030452914	0.760736196	0.902912621	0.825749168
324	1	0	1	1	1	0.850828729	0.149171271	1	0.850828729	0.919402985	0.969547086	0.030452914	0.760736196	0.902912621	0.825749168
324	1	0	1	1	1	0.850828729	0.149171271	1	0.850828729	0.919402985	0.969547086	0.030452914	0.760736196	0.902912621	0.825749168
324	1	0	1	1	1	0.850828729	0.149171271	1	0.850828729	0.919402985	0.969547086	0.030452914	0.760736196	0.902912621	0.825749168
324	1	0	1	1	1	0.850828729	0.149171271	1	0.850828729	0.919402985	0.969547086	0.030452914	0.760736196	0.902912621	0.825749168
324	1	0	1	1	1	0.850828729	0.149171271	1	0.850828729	0.919402985	0.969547086	0.030452914	0.760736196	0.902912621	0.825749168
324	1	0	1	1	1	0.850828729	0.149171271	1	0.850828729	0.919402985	0.969547086	0.030452914	0.760736196	0.902912621	0.825749168
324	1	0	1	1	1	0.850828729	0.149171271	1	0.850828729	0.919402985	0.969547086	0.030452914	0.760736196	0.902912621	0.825749168
324	1	0	1	1	1	0.850828729	0.149171271	1	0.850828729	0.919402985	0.969547086	0.030452914	0.760736196	0.902912621	0.825749168
324	1	0	1	1	1	0.850828729	0.149171271	1	0.850828729	0.919402985	0.969547086	0.030452914	0.760736196	0.902912621	0.825749168
324	1	0	1	1	1	0.850828729	0.149171271	1	0.850828729	0.919402985	0.969547086	0.030452914	0.760736196	0.902912621	0.825749168
324	1	0	1	1	1	0.850828729	0.149171271	1	0.850828729	0.919402985	0.969547086	0.030452914	0.760736196	0.902912621	0.825749168
324	1	0	1	1	1	0.850828729	0.149171271	1	0.850828729	0.919402985	0.969547086	0.030452914	0.760736196	0.902912621	0.825749168
323	1	0	1	1	1	0.850828729	0.149171271	1	0.850828729	0.919402985	0.969547086	0.030452914	0.760736196	0.902912621	0.825749168
323	1	0	1	1	1	0.850828729	0.149171271	1	0.850828729	0.919402985	0.969547086	0.030452914	0.760736196	0.902912621	0.825749168
323	1	0	1	1	1	0.850828729	0.149171271	1	0.850828729	0.919402985	0.969547086	0.030452914	0.760736196	0.902912621	0.825749168
323	1	0	1	1	1	0.850828729	0.149171271	1	0.850828729	0.919402985	0.969547086	0.030452914	0.760736196	0.902912621	0.825749168
323	1	0	1	1	1	0.850828729	0.149171271	1	0.850828729	0.919402985	0.969547086	0.030452914	0.760736196	0.902912621	0.825749168
323	1	0	1	1	1	0.850828729	0.149171271	1	0.850828729	0.919402985	0.969547086	0.030452914	0.760736196	0.902912621	0.825749168
323	1	0	1	1	1	0.850828729	0.149171271	1	0.850828729	0.919402985	0.969547086	0.030452914	0.760736196	0.902912621	0.825749168
323	1	0	1	1	1	0.850828729	0.149171271	1	0.850828729	0.919402985	0.969547086	0.030452914	0.760736196	0.902912621	0.825749168
323	1	0	1	1	1	0.850828729	0.149171271	1	0.850828729	0.919402985	0.969547086	0.030452914	0.760736196	0.902912621	0.825749168
323	1	0	1	1	1	0.850828729	0.149171271	1	0.850828729	0.919402985	0.969547086	0.030452914	0.760736196	0.902912621	0.825749168
323	1	0	1	1	1	0.850828729	0.149171271	1	0.850828729	0.919402985	0.969547086	0.030452914	0.760736196	0.902912621	0.825749168
323	1	0	1	1	1	0.850828729	0.149171271	1	0.850828729	0.919402985	0.969547086	0.030452914	0.760736196	0.902912621	0.825749168
323	1	0	1	1	1	0.850828729	0.149171271	1	0.850828729	0.919402985	0.969547086	0.030452914	0.760736196	0.902912621	0.825749168
323	1	0	1	1	1	0.850828729	0.149171271	1	0.850828729	0.919402985	0.969547086	0.030452914	0.760736196	0.902912621	0.825749168
323	1	0	1	1	1	0.850828729	0.149171271	1	0.850828729	0.919402985	0.969547086	0.030452914	0.760736196	0.902912621	0.825749168
323	1	0	1	1	1	0.850828729	0.149171271	1	0.850828729	0.919402985	0.969547086	0.030452914	0.760736196	0.902912621	0.825749168
323	1	0	1	1	1	0.850828729	0.149171271	1	0.850828729	0.919402985	0.969547086	0.030452914	0.760736196	0.902912621	0.825749168
323	1	0	1	1	1	0.850828729	0.149171271	1	0.850828729	0.919402985	0.969547086	0.030452914	0.760736196	0.902912621	0.825749168
323	1	0	1	1	1	0.850828729	0.149171271	1	0.850828729	0.919402985	0.969547086	0.030452914	0.760736196	0.902912621	0.825749168
323	1	0	1	1	1	0.850828729	0.149171271	1	0.850828729	0.919402985	0.969547086	0.030452914	0.760736196	0.902912621	0.825749168
323	1	0	1	1	1	0.850828729	0.149171271	1	0.850828729	0.919402985	0.969547086	0.030452914	0.760736196	0.902912621	0.825749168
323	1	0	1	1	1	0.850828729	0.149171271	1	0.850828729	0.919402985	0.969547086	0.030452914	0.760736196	0.902912621	0.825749168
323	1	0	1	1	1	0.850828729	0.149171271	1	0.850828729	0.919402985	0.969547086	0.030452914	0.760736196	0.902912621	0.825749168
323	1	0	1	1	1	0.850828729	0.149171271	1	0.850828729	0.919402985	0.969547086	0.030452914	0.760736196	0.902912621	0.825749168
323	1	0	1	1	1	0.850828729	0.149171271	1	0.850828729	0.919402985	0.969547086	0.030452914	0.760736196	0.902912621	0.825749168
323	1	0	1	1	1	0.850828729	0.149171271	1	0.850828729	0.919402985	0.969547086	0.030452914	0.760736196	0.902912621	0.825749168
323	1	0	1	1	1	0.850828729	0.149171271	1	0.850828729	0.919402985	0.969547086	0.030452914	0.760736196	0.902912621	0.825749168
323	1	0	1	1	1	0.850828729	0.149171271	1	0.850828729	0.919402985	0.969547086	0.030452914	0.760736196	0.902912621	0.825749168
323	1	0	1	1	1	0.850828729	0.149171271	1	0.850828729	0.919402985	0.969547086	0.030452914	0.760736196	0.902912621	0.825749168
323	1	0	1	1	1	0.850828729	0.149171271	1	0.850828729	0.919402985	0.969547086	0.030452914	0.760736196	0.902912621	0.825749168
323	1	0	1	1	1	0.850828729	0.149171271	1	0.850828729	0.919402985	0.969547086	0.030452914	0.760736196	0.902912621	0.825749168
323	1	0	1	1	1	0.850828729	0.149171271	1	0.850828729	0.919402985	0.969547086	0.030452914	0.760736196	0.902912621	0.825749168
323	1	0	1	1	1	0.850828729	0.149171271	1	0.850828729	0.919402985	0.969547086	0.030452914	0.760736196	0.902912621	0.825749168
323	1	0	1	1	1	0.850828729	0.149171271	1	0.850828729	0.919402985	0.969547086	0.030452914	0.760736196	0.902912621	0.825749168
323	1	0	1	1	1	0.850828729	0.149171271	1	0.850828729	0.919402985	0.969547086	0.030452914	0.760736196	0.902912621	0.825749168
323	1	0	1	1	1	0.850828729	0.149171271	1	0.850828729	0.919402985	0.969547086	0.030452914	0.760736196	0.902912621	0.825749168
323	1	0	1	1	1	0.850828729	0.149171271	1	0.850828729	0.919402985	0.969547086	0.030452914	0.760736196	0.902912621	0.825749168
323	1	0	1	1	1	0.850828729	0.149171271	1	0.850828729	0.919402985	0.969547086	0.030452914	0.760736196	0.902912621	0.825749168
323	1	0	1	1	1	0.850828729	0.149171271	1	0.850828729	0.919402985	0.969547086	0.030452914	0.760736196	0.902912621	0.825749168
323	1	0	1	1	1	0.850828729	0.149171271	1	0.850828729	0.919402985	0.969547086	0.030452914	0.760736196	0.902912621	0.825749168
323	1	0	1	1	1	0.850828729	0.149171271	1	0.850828729	0.919402985	0.969547086	0.030452914	0.760736196	0.902912621	0.825749168
323	1	0	1	1	1	0.850828729	0.149171271	1	0.850828729	0.919402985	0.969547086	0.030452914	0.760736196	0.902912621	0.825749168
323	1	0	1	1	1	0.850828729	0.149171271	1	0.850828729	0.919402985	0.969547086	0.030452914	0.760736196	0.902912621	0.825749168
323	1	0	1	1	1	0.850828729	0.149171271	1	0.850828729	0.919402985	0.969547086	0.030452914	0.760736196	0.902912621	0.825749168
323	1	0	1	1	1	0.850828729	0.149171271	1	0.850828729	0.919402985	0.969547086	0.030452914	0.760736196	0.902912621	0.825749168
323	1	0	1	1	1	0.850828729	0.149171271	1	0.850828729	0.919402985	0.969547086	0.030452914	0.760736196	0.902912621	0.825749168
323	1	0	1	1	1	0.850828729	0.149171271	1	0.850828729	0.919402985	0.969547086	0.030452914	0.760736196	0.902912621	0.825749168
323	1	0	1	1	1	0.850828729	0.149171271	1	0.850828729	0.919402985	0.969547086	0.030452914	0.760736196	0.902912621	0.825749168
323	1	0	1	1	1	0.850828729	0.149171271	1	0.850828729	0.919402985	0.969547086	0.030452914	0.760736196	0.902912621	0.825749168
323	1	0	1	1	1	0.850828729	0.149171271	1	0.850828729	0.919402985	0.969547086	0.030452914	0.760736196	0.902912621	0.825749168
323	1	0	1	1	1	0.850828729	0.149171271	1	0.850828729	0.919402985	0.969547086	0.030452914	0.760736196	0.902912621	0.825749168
323	1	0	1	1	1	0.850828729	0.149171271	1	0.850828729	0.919402985	0.969547086	0.030452914	0.760736196	0.902912621	0.825749168
323	1	0	1	1	1	0.850828729	0.149171271	1	0.850828729	0.919402985	0.969547086	0.030452914	0.760736196	0.902912621	0.825749168
323	1	0	1	1	1	0.850828729	0.149171271	1	0.850828729	0.919402985	0.969547086	0.030452914	0.760736196	0.902912621	0.825749168
323	1	0	1	1	1	0.850828729	0.149171271	1	0.850828729	0.919402985	0.969547086	0.030452914	0.760736196	0.902912621	0.825749168
323	1	0	1	1	1	0.850828729	0.149171271	1	0.850828729	0.919402985	0.969547086	0.030452914	0.760736196	0.902912621	0.825749168
323	1	0	1	1	1	0.850828729	0.149171271	1	0.850828729	0.919402985	0.969547086	0.030452914	0.760736196	0.902912621	0.825749168
323	1	0	1	1	1	0.850828729	0.149171271	1	0.850828729	0.919402985	0.969547086	0.030452914	0.760736196	0.902912621	0.825749168
323	1	0	1	1	1	0.850828729	0.149171271	1	0.850828729	0.919402985	0.969547086	0.030452914	0.760736196	0.902912621	0.825749168
323	1	0	1	1	1	0.850828729	0.149171271	1	0.850828729	0.919402985	0.969547086	0.030452914	0.760736196	0.902912621	0.825749168
323	1	0	1	1	1	0.850828729	0.149171271	1	0.850828729	0.919402985	0.969547086	0.030452914	0.760736196	0.902912621	0.825749168
323	1	0	1	1	1	0.850828729	0.149171271	1	0.850828729	0.919402985	0.969547086	0.030452914	0.760736196	0.902912621	0.825749168
323	1	0	1	1	1	0.850828729	0.149171271	1	0.850828729	0.919402985	0.969547086	0.030452914	0.760736196	0.902912621	0.825749168
323	1	0	1	1	1	0.850828729	0.149171271	1	0.850828729	0.919402985	0.969547086	0.030452914	0.760736196	0.902912621	0.825749168
323	1	0	1	1	1	0.850828729	0.149171271	1	0.850828729	0.919402985	0.969547086	0.030452914	0.760736196	0.902912621	0.825749168
323	1	0	1	1	1	0.850828729	0.149171271	1	0.850828729	0.919402985	0.969547086	0.030452914	0.760736196	0.902912621	0.825749168
323	1	0	1	1	1	0.850828729	0.149171271	1	0.850828729	0.919402985	0.969547086	0.030452914	0.760736196	0.902912621	0.825749168
323	1	0	1	1	1	0.850828729	0.149171271	1	0.850828729	0.919402985	0.969547086	0.030452914	0.760736196	0.902912621	0.825749168
323	1	0	1	1	1	0.850828729	0.149171271	1	0.850828729	0.919402985	0.969547086	0.030452914	0.760736196	0.902912621	0.825749168
323	1	0	1	1	1	0.850828729	0.149171271	1	0.850828729	0.919402985	0.969547086	0.030452914	0.760736196	0.902912621	0.825749168
323	1	0	1	1	1	0.850828729	0.149171271	1	0.850828729	0.919402985	0.969547086	0.030452914	0.760736196	0.902912621	0.825749168
323	1	0	1	1	1	0.850828729	0.149171271	1	0.850828729	0.919402985	0.969547086	0.030452914	0.760736196	0.902912621	0.825749168
323	1	0	1	1	1	0.850828729	0.149171271	1	0.850828729	0.919402985	0.969547086	0.030452914	0.760736196	0.902912621	0.825749168
323	1	0	1	1	1	0.850828729	0.149171271	1	0.850828729	0.919402985	0.969547086	0.030452914	0.760736196	0.902912621	0.825749168
323	1	0	1	1	1	0.850828729	0.149171271	1	0.850828729	0.919402985	0.969547086	0.030452914	0.760736196	0.902912621	0.825749168
323	1	0	1	1	1	0.850828729	0.149171271	1	0.850828729	0.919402985	0.969547086	0.030452914	0.760736196	0.902912621	0.825749168
323	1	0	1	1	1	0.850828729	0.149171271	1	0.850828729	0.919402985	0.969547086	0.030452914	0.760736196	0.902912621	0.825749168
323	1	0	1	1	1	0.850828729	0.149171271	1	0.850828729	0.919402985	0.969547086	0.030452914	0.760736196	0.902912621	0.825749168
323	1	0	1	1	1	0.850828729	0.149171271	1	0.850828729	0.919402985	0.969547086	0.030452914	0.760736196	0.902912621	0.825749168
323	1	0	1	1	1	0.850828729	0.149171271	1	0.850828729	0.919402985	0.969547086	0.030452914	0.760736196	0.902912621	0.825749168
323	1	0	1	1	1	0.850828729	0.149171271	1	0.850828729	0.919402985	0.969547086	0.030452914	0.760736196	0.902912621	0.825749168
323	1	0	1	1	1	0.850828729	0.149171271	1	0.850828729	0.919402985	0.969547086	0.030452914	0.760736196	0.902912621	0.825749168
323	1	0	1	1	1	0.850828729	0.149171271	1	0.850828729	0.919402985	0.969547086	0.030452914	0.760736196	0.902912621	0.825749168
323	1	0	1	1	1	0.850828729	0.149171271	1	0.850828729	0.919402985	0.969547086	0.030452914	0.760736196	0.902912621	0.825749168
323	1	0	1	1	1	0.850828729	0.149171271	1	0.850828729	0.919402985	0.969547086	0.030452914	0.760736196	0.902912621	0.825749168
323	1	0	1	1	1	0.850828729	0.149171271	1	0.850828729	0.919402985	0.969547086	0.030452914	0.760736196	0.902912621	0.825749168
323	1	0	1	1	1	0.850828729	0.149171271	1	0.850828729	0.919402985	0.969547086	0.030452914	0.760736196	0.902912621	0.825749168
323	1	0	1	1	1	0.850828729	0.149171271	1	0.850828729	0.919402985	0.969547086	0.030452914	0.760736196	0.902912621	0.825749168
323	1	0	1	1	1	0.850828729	0.149171271	1	0.850828729	0.919402985	0.969547086	0.030452914	0.760736196	0.902912621	0.825749168
323	1	0	1	1	1	0.850828729	0.149171271	1	0.850828729	0.919402985	0.969547086	0.030452914	0.760736196	0.902912621	0.825749168
323	1	0	1	1	1	0.850828729	0.149171271	1	0.850828729	0.919402985	0.969547086	0.030452914	0.760736196	0.902912621	0.825749168
323	1	0	1	1	1	0.850828729	0.149171271	1	0.850828729	0.919402985	0.969547086	0.030452914	0.760736196	0.902912621	0.825749168
323	1	0	1	1	1	0.850828729	0.149171271	1	0.850828729	0.919402985	0.969547086	0.030452914	0.760736196	0.902912621	0.825749168
