# Supplementary material for: An Improved Hybrid Feature Selection Algorithm for Electric Charge Recovery Risk
Source: Hindawi journal article supplement (doi:10.1155/2020/8479341), 2020-08-28
Supplement: f1 [file 8479341.f1.zip › 8479341.f1/Experimental Results/201807/LBPSOSEE_results.csv]

features_num	Accuracy_high	Loss_high	Precission_high	Recall_high	F1_high	Accuracy_med	Loss_med	Precission_med	Recall_med	F1_med	Accuracy_low	Loss_low	Precission_low	Recall_low	F1_low
278	1.0	0.0	1.0	1.0	1.0	0.8464730290456431	0.15352697095435686	1.0	0.8460471567267683	0.9166040570999248	0.9569637745533512	0.04303622544664887	0.6124197002141327	0.8854489164086687	0.7240506329113925
278	1.0	0.0	1.0	1.0	1.0	0.8464730290456431	0.15352697095435686	1.0	0.8460471567267683	0.9166040570999248	0.9569637745533512	0.04303622544664887	0.6124197002141327	0.8854489164086687	0.7240506329113925
278	1.0	0.0	1.0	1.0	1.0	0.8464730290456431	0.15352697095435686	1.0	0.8460471567267683	0.9166040570999248	0.9569637745533512	0.04303622544664887	0.6124197002141327	0.8854489164086687	0.7240506329113925
278	1.0	0.0	1.0	1.0	1.0	0.8464730290456431	0.15352697095435686	1.0	0.8460471567267683	0.9166040570999248	0.9569637745533512	0.04303622544664887	0.6124197002141327	0.8854489164086687	0.7240506329113925
278	1.0	0.0	1.0	1.0	1.0	0.8464730290456431	0.15352697095435686	1.0	0.8460471567267683	0.9166040570999248	0.9569637745533512	0.04303622544664887	0.6124197002141327	0.8854489164086687	0.7240506329113925
278	1.0	0.0	1.0	1.0	1.0	0.8464730290456431	0.15352697095435686	1.0	0.8460471567267683	0.9166040570999248	0.9569637745533512	0.04303622544664887	0.6124197002141327	0.8854489164086687	0.7240506329113925
278	1.0	0.0	1.0	1.0	1.0	0.8464730290456431	0.15352697095435686	1.0	0.8460471567267683	0.9166040570999248	0.9569637745533512	0.04303622544664887	0.6124197002141327	0.8854489164086687	0.7240506329113925
278	1.0	0.0	1.0	1.0	1.0	0.8464730290456431	0.15352697095435686	1.0	0.8460471567267683	0.9166040570999248	0.9569637745533512	0.04303622544664887	0.6124197002141327	0.8854489164086687	0.7240506329113925
278	1.0	0.0	1.0	1.0	1.0	0.8464730290456431	0.15352697095435686	1.0	0.8460471567267683	0.9166040570999248	0.9569637745533512	0.04303622544664887	0.6124197002141327	0.8854489164086687	0.7240506329113925
278	1.0	0.0	1.0	1.0	1.0	0.8464730290456431	0.15352697095435686	1.0	0.8460471567267683	0.9166040570999248	0.9569637745533512	0.04303622544664887	0.6124197002141327	0.8854489164086687	0.7240506329113925
278	1.0	0.0	1.0	1.0	1.0	0.8464730290456431	0.15352697095435686	1.0	0.8460471567267683	0.9166040570999248	0.9569637745533512	0.04303622544664887	0.6124197002141327	0.8854489164086687	0.7240506329113925
278	1.0	0.0	1.0	1.0	1.0	0.8464730290456431	0.15352697095435686	1.0	0.8460471567267683	0.9166040570999248	0.9569637745533512	0.04303622544664887	0.6124197002141327	0.8854489164086687	0.7240506329113925
278	1.0	0.0	1.0	1.0	1.0	0.8464730290456431	0.15352697095435686	1.0	0.8460471567267683	0.9166040570999248	0.9569637745533512	0.04303622544664887	0.6124197002141327	0.8854489164086687	0.7240506329113925
278	1.0	0.0	1.0	1.0	1.0	0.8464730290456431	0.15352697095435686	1.0	0.8460471567267683	0.9166040570999248	0.9569637745533512	0.04303622544664887	0.6124197002141327	0.8854489164086687	0.7240506329113925
278	1.0	0.0	1.0	1.0	1.0	0.8464730290456431	0.15352697095435686	1.0	0.8460471567267683	0.9166040570999248	0.9569637745533512	0.04303622544664887	0.6124197002141327	0.8854489164086687	0.7240506329113925
278	1.0	0.0	1.0	1.0	1.0	0.8464730290456431	0.15352697095435686	1.0	0.8460471567267683	0.9166040570999248	0.9569637745533512	0.04303622544664887	0.6124197002141327	0.8854489164086687	0.7240506329113925
278	1.0	0.0	1.0	1.0	1.0	0.8464730290456431	0.15352697095435686	1.0	0.8460471567267683	0.9166040570999248	0.9569637745533512	0.04303622544664887	0.6124197002141327	0.8854489164086687	0.7240506329113925
307	1.0	0.0	1.0	1.0	1.0	0.8404993065187241	0.15950069348127605	0.9967105263157896	0.8428372739916551	0.9133383571966844	0.9604028833810604	0.0395971166189395	0.6302702702702703	0.9080996884735204	0.7440970006381621
307	1.0	0.0	1.0	1.0	1.0	0.8404993065187241	0.15950069348127605	0.9967105263157896	0.8428372739916551	0.9133383571966844	0.9604028833810604	0.0395971166189395	0.6302702702702703	0.9080996884735204	0.7440970006381621
307	1.0	0.0	1.0	1.0	1.0	0.8404993065187241	0.15950069348127605	0.9967105263157896	0.8428372739916551	0.9133383571966844	0.9604028833810604	0.0395971166189395	0.6302702702702703	0.9080996884735204	0.7440970006381621
307	1.0	0.0	1.0	1.0	1.0	0.8404993065187241	0.15950069348127605	0.9967105263157896	0.8428372739916551	0.9133383571966844	0.9604028833810604	0.0395971166189395	0.6302702702702703	0.9080996884735204	0.7440970006381621
290	1.0	0.0	1.0	1.0	1.0	0.8407079646017699	0.15929203539823011	0.9982394366197184	0.841246290801187	0.9130434782608696	0.963622062727362	0.03637793727263794	0.6770601336302895	0.8837209302325582	0.7667087011349306
290	1.0	0.0	1.0	1.0	1.0	0.8407079646017699	0.15929203539823011	0.9982394366197184	0.841246290801187	0.9130434782608696	0.963622062727362	0.03637793727263794	0.6770601336302895	0.8837209302325582	0.7667087011349306
290	1.0	0.0	1.0	1.0	1.0	0.8407079646017699	0.15929203539823011	0.9982394366197184	0.841246290801187	0.9130434782608696	0.963622062727362	0.03637793727263794	0.6770601336302895	0.8837209302325582	0.7667087011349306
290	1.0	0.0	1.0	1.0	1.0	0.8407079646017699	0.15929203539823011	0.9982394366197184	0.841246290801187	0.9130434782608696	0.963622062727362	0.03637793727263794	0.6770601336302895	0.8837209302325582	0.7667087011349306
290	1.0	0.0	1.0	1.0	1.0	0.8407079646017699	0.15929203539823011	0.9982394366197184	0.841246290801187	0.9130434782608696	0.963622062727362	0.03637793727263794	0.6770601336302895	0.8837209302325582	0.7667087011349306
290	1.0	0.0	1.0	1.0	1.0	0.8407079646017699	0.15929203539823011	0.9982394366197184	0.841246290801187	0.9130434782608696	0.963622062727362	0.03637793727263794	0.6770601336302895	0.8837209302325582	0.7667087011349306
290	1.0	0.0	1.0	1.0	1.0	0.8407079646017699	0.15929203539823011	0.9982394366197184	0.841246290801187	0.9130434782608696	0.963622062727362	0.03637793727263794	0.6770601336302895	0.8837209302325582	0.7667087011349306
290	1.0	0.0	1.0	1.0	1.0	0.8407079646017699	0.15929203539823011	0.9982394366197184	0.841246290801187	0.9130434782608696	0.963622062727362	0.03637793727263794	0.6770601336302895	0.8837209302325582	0.7667087011349306
290	1.0	0.0	1.0	1.0	1.0	0.8407079646017699	0.15929203539823011	0.9982394366197184	0.841246290801187	0.9130434782608696	0.963622062727362	0.03637793727263794	0.6770601336302895	0.8837209302325582	0.7667087011349306
222	1.0	0.0	1.0	1.0	1.0	0.8127925117004681	0.18720748829953196	1.0	0.8125	0.8965517241379308	0.9763956904995102	0.02360430950048975	0.8156862745098039	0.8618784530386742	0.8381464069845533
222	1.0	0.0	1.0	1.0	1.0	0.8127925117004681	0.18720748829953196	1.0	0.8125	0.8965517241379308	0.9763956904995102	0.02360430950048975	0.8156862745098039	0.8618784530386742	0.8381464069845533
222	1.0	0.0	1.0	1.0	1.0	0.8127925117004681	0.18720748829953196	1.0	0.8125	0.8965517241379308	0.9763956904995102	0.02360430950048975	0.8156862745098039	0.8618784530386742	0.8381464069845533
222	1.0	0.0	1.0	1.0	1.0	0.8127925117004681	0.18720748829953196	1.0	0.8125	0.8965517241379308	0.9763956904995102	0.02360430950048975	0.8156862745098039	0.8618784530386742	0.8381464069845533
222	1.0	0.0	1.0	1.0	1.0	0.8127925117004681	0.18720748829953196	1.0	0.8125	0.8965517241379308	0.9763956904995102	0.02360430950048975	0.8156862745098039	0.8618784530386742	0.8381464069845533
222	1.0	0.0	1.0	1.0	1.0	0.8127925117004681	0.18720748829953196	1.0	0.8125	0.8965517241379308	0.9763956904995102	0.02360430950048975	0.8156862745098039	0.8618784530386742	0.8381464069845533
222	1.0	0.0	1.0	1.0	1.0	0.8127925117004681	0.18720748829953196	1.0	0.8125	0.8965517241379308	0.9763956904995102	0.02360430950048975	0.8156862745098039	0.8618784530386742	0.8381464069845533
222	1.0	0.0	1.0	1.0	1.0	0.8127925117004681	0.18720748829953196	1.0	0.8125	0.8965517241379308	0.9763956904995102	0.02360430950048975	0.8156862745098039	0.8618784530386742	0.8381464069845533
222	1.0	0.0	1.0	1.0	1.0	0.8127925117004681	0.18720748829953196	1.0	0.8125	0.8965517241379308	0.9763956904995102	0.02360430950048975	0.8156862745098039	0.8618784530386742	0.8381464069845533
222	1.0	0.0	1.0	1.0	1.0	0.8127925117004681	0.18720748829953196	1.0	0.8125	0.8965517241379308	0.9763956904995102	0.02360430950048975	0.8156862745098039	0.8618784530386742	0.8381464069845533
222	1.0	0.0	1.0	1.0	1.0	0.8127925117004681	0.18720748829953196	1.0	0.8125	0.8965517241379308	0.9763956904995102	0.02360430950048975	0.8156862745098039	0.8618784530386742	0.8381464069845533
222	1.0	0.0	1.0	1.0	1.0	0.8127925117004681	0.18720748829953196	1.0	0.8125	0.8965517241379308	0.9763956904995102	0.02360430950048975	0.8156862745098039	0.8618784530386742	0.8381464069845533
222	1.0	0.0	1.0	1.0	1.0	0.8127925117004681	0.18720748829953196	1.0	0.8125	0.8965517241379308	0.9763956904995102	0.02360430950048975	0.8156862745098039	0.8618784530386742	0.8381464069845533
222	1.0	0.0	1.0	1.0	1.0	0.8127925117004681	0.18720748829953196	1.0	0.8125	0.8965517241379308	0.9763956904995102	0.02360430950048975	0.8156862745098039	0.8618784530386742	0.8381464069845533
222	1.0	0.0	1.0	1.0	1.0	0.8127925117004681	0.18720748829953196	1.0	0.8125	0.8965517241379308	0.9763956904995102	0.02360430950048975	0.8156862745098039	0.8618784530386742	0.8381464069845533
222	1.0	0.0	1.0	1.0	1.0	0.8127925117004681	0.18720748829953196	1.0	0.8125	0.8965517241379308	0.9763956904995102	0.02360430950048975	0.8156862745098039	0.8618784530386742	0.8381464069845533
222	1.0	0.0	1.0	1.0	1.0	0.8127925117004681	0.18720748829953196	1.0	0.8125	0.8965517241379308	0.9763956904995102	0.02360430950048975	0.8156862745098039	0.8618784530386742	0.8381464069845533
222	1.0	0.0	1.0	1.0	1.0	0.8127925117004681	0.18720748829953196	1.0	0.8125	0.8965517241379308	0.9763956904995102	0.02360430950048975	0.8156862745098039	0.8618784530386742	0.8381464069845533
222	1.0	0.0	1.0	1.0	1.0	0.8127925117004681	0.18720748829953196	1.0	0.8125	0.8965517241379308	0.9763956904995102	0.02360430950048975	0.8156862745098039	0.8618784530386742	0.8381464069845533
222	1.0	0.0	1.0	1.0	1.0	0.8127925117004681	0.18720748829953196	1.0	0.8125	0.8965517241379308	0.9763956904995102	0.02360430950048975	0.8156862745098039	0.8618784530386742	0.8381464069845533
222	1.0	0.0	1.0	1.0	1.0	0.8127925117004681	0.18720748829953196	1.0	0.8125	0.8965517241379308	0.9763956904995102	0.02360430950048975	0.8156862745098039	0.8618784530386742	0.8381464069845533
222	1.0	0.0	1.0	1.0	1.0	0.8127925117004681	0.18720748829953196	1.0	0.8125	0.8965517241379308	0.9763956904995102	0.02360430950048975	0.8156862745098039	0.8618784530386742	0.8381464069845533
222	1.0	0.0	1.0	1.0	1.0	0.8127925117004681	0.18720748829953196	1.0	0.8125	0.8965517241379308	0.9763956904995102	0.02360430950048975	0.8156862745098039	0.8618784530386742	0.8381464069845533
222	1.0	0.0	1.0	1.0	1.0	0.8127925117004681	0.18720748829953196	1.0	0.8125	0.8965517241379308	0.9763956904995102	0.02360430950048975	0.8156862745098039	0.8618784530386742	0.8381464069845533
222	1.0	0.0	1.0	1.0	1.0	0.8127925117004681	0.18720748829953196	1.0	0.8125	0.8965517241379308	0.9763956904995102	0.02360430950048975	0.8156862745098039	0.8618784530386742	0.8381464069845533
222	1.0	0.0	1.0	1.0	1.0	0.8127925117004681	0.18720748829953196	1.0	0.8125	0.8965517241379308	0.9763956904995102	0.02360430950048975	0.8156862745098039	0.8618784530386742	0.8381464069845533
222	1.0	0.0	1.0	1.0	1.0	0.8127925117004681	0.18720748829953196	1.0	0.8125	0.8965517241379308	0.9763956904995102	0.02360430950048975	0.8156862745098039	0.8618784530386742	0.8381464069845533
222	1.0	0.0	1.0	1.0	1.0	0.8127925117004681	0.18720748829953196	1.0	0.8125	0.8965517241379308	0.9763956904995102	0.02360430950048975	0.8156862745098039	0.8618784530386742	0.8381464069845533
222	1.0	0.0	1.0	1.0	1.0	0.8127925117004681	0.18720748829953196	1.0	0.8125	0.8965517241379308	0.9763956904995102	0.02360430950048975	0.8156862745098039	0.8618784530386742	0.8381464069845533
222	1.0	0.0	1.0	1.0	1.0	0.8127925117004681	0.18720748829953196	1.0	0.8125	0.8965517241379308	0.9763956904995102	0.02360430950048975	0.8156862745098039	0.8618784530386742	0.8381464069845533
222	1.0	0.0	1.0	1.0	1.0	0.8127925117004681	0.18720748829953196	1.0	0.8125	0.8965517241379308	0.9763956904995102	0.02360430950048975	0.8156862745098039	0.8618784530386742	0.8381464069845533
222	1.0	0.0	1.0	1.0	1.0	0.8127925117004681	0.18720748829953196	1.0	0.8125	0.8965517241379308	0.9763956904995102	0.02360430950048975	0.8156862745098039	0.8618784530386742	0.8381464069845533
222	1.0	0.0	1.0	1.0	1.0	0.8127925117004681	0.18720748829953196	1.0	0.8125	0.8965517241379308	0.9763956904995102	0.02360430950048975	0.8156862745098039	0.8618784530386742	0.8381464069845533
222	1.0	0.0	1.0	1.0	1.0	0.8127925117004681	0.18720748829953196	1.0	0.8125	0.8965517241379308	0.9763956904995102	0.02360430950048975	0.8156862745098039	0.8618784530386742	0.8381464069845533
222	1.0	0.0	1.0	1.0	1.0	0.8127925117004681	0.18720748829953196	1.0	0.8125	0.8965517241379308	0.9763956904995102	0.02360430950048975	0.8156862745098039	0.8618784530386742	0.8381464069845533
222	1.0	0.0	1.0	1.0	1.0	0.8127925117004681	0.18720748829953196	1.0	0.8125	0.8965517241379308	0.9763956904995102	0.02360430950048975	0.8156862745098039	0.8618784530386742	0.8381464069845533
222	1.0	0.0	1.0	1.0	1.0	0.8127925117004681	0.18720748829953196	1.0	0.8125	0.8965517241379308	0.9763956904995102	0.02360430950048975	0.8156862745098039	0.8618784530386742	0.8381464069845533
222	1.0	0.0	1.0	1.0	1.0	0.8127925117004681	0.18720748829953196	1.0	0.8125	0.8965517241379308	0.9763956904995102	0.02360430950048975	0.8156862745098039	0.8618784530386742	0.8381464069845533
222	1.0	0.0	1.0	1.0	1.0	0.8127925117004681	0.18720748829953196	1.0	0.8125	0.8965517241379308	0.9763956904995102	0.02360430950048975	0.8156862745098039	0.8618784530386742	0.8381464069845533
243	1.0	0.0	1.0	1.0	1.0	0.8042813455657493	0.19571865443425074	1.0	0.8042813455657493	0.8915254237288135	0.9791176470588236	0.020882352941176463	0.7840909090909091	0.967741935483871	0.8662900188323917
243	1.0	0.0	1.0	1.0	1.0	0.8042813455657493	0.19571865443425074	1.0	0.8042813455657493	0.8915254237288135	0.9791176470588236	0.020882352941176463	0.7840909090909091	0.967741935483871	0.8662900188323917
243	1.0	0.0	1.0	1.0	1.0	0.8042813455657493	0.19571865443425074	1.0	0.8042813455657493	0.8915254237288135	0.9791176470588236	0.020882352941176463	0.7840909090909091	0.967741935483871	0.8662900188323917
243	1.0	0.0	1.0	1.0	1.0	0.8042813455657493	0.19571865443425074	1.0	0.8042813455657493	0.8915254237288135	0.9791176470588236	0.020882352941176463	0.7840909090909091	0.967741935483871	0.8662900188323917
243	1.0	0.0	1.0	1.0	1.0	0.8042813455657493	0.19571865443425074	1.0	0.8042813455657493	0.8915254237288135	0.9791176470588236	0.020882352941176463	0.7840909090909091	0.967741935483871	0.8662900188323917
243	1.0	0.0	1.0	1.0	1.0	0.8257713248638838	0.17422867513611615	1.0	0.8257713248638838	0.9045725646123258	0.9780646413665922	0.021935358633407787	0.8367579908675801	0.8982843137254902	0.8664302600472813
243	1.0	0.0	1.0	1.0	1.0	0.8257713248638838	0.17422867513611615	1.0	0.8257713248638838	0.9045725646123258	0.9780646413665922	0.021935358633407787	0.8367579908675801	0.8982843137254902	0.8664302600472813
282	1.0	0.0	1.0	1.0	1.0	0.8257713248638838	0.17422867513611615	1.0	0.8257713248638838	0.9045725646123258	0.9780646413665922	0.021935358633407787	0.8367579908675801	0.8982843137254902	0.8664302600472813
282	1.0	0.0	1.0	1.0	1.0	0.8257713248638838	0.17422867513611615	1.0	0.8257713248638838	0.9045725646123258	0.9780646413665922	0.021935358633407787	0.8367579908675801	0.8982843137254902	0.8664302600472813
282	1.0	0.0	1.0	1.0	1.0	0.8257713248638838	0.17422867513611615	1.0	0.8257713248638838	0.9045725646123258	0.9780646413665922	0.021935358633407787	0.8367579908675801	0.8982843137254902	0.8664302600472813
282	1.0	0.0	1.0	1.0	1.0	0.8257713248638838	0.17422867513611615	1.0	0.8257713248638838	0.9045725646123258	0.9780646413665922	0.021935358633407787	0.8367579908675801	0.8982843137254902	0.8664302600472813
282	1.0	0.0	1.0	1.0	1.0	0.8257713248638838	0.17422867513611615	1.0	0.8257713248638838	0.9045725646123258	0.9780646413665922	0.021935358633407787	0.8367579908675801	0.8982843137254902	0.8664302600472813
282	1.0	0.0	1.0	1.0	1.0	0.8257713248638838	0.17422867513611615	1.0	0.8257713248638838	0.9045725646123258	0.9780646413665922	0.021935358633407787	0.8367579908675801	0.8982843137254902	0.8664302600472813
282	1.0	0.0	1.0	1.0	1.0	0.8257713248638838	0.17422867513611615	1.0	0.8257713248638838	0.9045725646123258	0.9780646413665922	0.021935358633407787	0.8367579908675801	0.8982843137254902	0.8664302600472813
282	1.0	0.0	1.0	1.0	1.0	0.8257713248638838	0.17422867513611615	1.0	0.8257713248638838	0.9045725646123258	0.9780646413665922	0.021935358633407787	0.8367579908675801	0.8982843137254902	0.8664302600472813
282	1.0	0.0	1.0	1.0	1.0	0.8257713248638838	0.17422867513611615	1.0	0.8257713248638838	0.9045725646123258	0.9780646413665922	0.021935358633407787	0.8367579908675801	0.8982843137254902	0.8664302600472813
282	1.0	0.0	1.0	1.0	1.0	0.8257713248638838	0.17422867513611615	1.0	0.8257713248638838	0.9045725646123258	0.9780646413665922	0.021935358633407787	0.8367579908675801	0.8982843137254902	0.8664302600472813
282	1.0	0.0	1.0	1.0	1.0	0.8257713248638838	0.17422867513611615	1.0	0.8257713248638838	0.9045725646123258	0.9780646413665922	0.021935358633407787	0.8367579908675801	0.8982843137254902	0.8664302600472813
282	1.0	0.0	1.0	1.0	1.0	0.8257713248638838	0.17422867513611615	1.0	0.8257713248638838	0.9045725646123258	0.9780646413665922	0.021935358633407787	0.8367579908675801	0.8982843137254902	0.8664302600472813
282	1.0	0.0	1.0	1.0	1.0	0.8257713248638838	0.17422867513611615	1.0	0.8257713248638838	0.9045725646123258	0.9780646413665922	0.021935358633407787	0.8367579908675801	0.8982843137254902	0.8664302600472813
282	1.0	0.0	1.0	1.0	1.0	0.8257713248638838	0.17422867513611615	1.0	0.8257713248638838	0.9045725646123258	0.9780646413665922	0.021935358633407787	0.8367579908675801	0.8982843137254902	0.8664302600472813
282	1.0	0.0	1.0	1.0	1.0	0.8257713248638838	0.17422867513611615	1.0	0.8257713248638838	0.9045725646123258	0.9780646413665922	0.021935358633407787	0.8367579908675801	0.8982843137254902	0.8664302600472813
282	1.0	0.0	1.0	1.0	1.0	0.8257713248638838	0.17422867513611615	1.0	0.8257713248638838	0.9045725646123258	0.9780646413665922	0.021935358633407787	0.8367579908675801	0.8982843137254902	0.8664302600472813
282	1.0	0.0	1.0	1.0	1.0	0.8257713248638838	0.17422867513611615	1.0	0.8257713248638838	0.9045725646123258	0.9780646413665922	0.021935358633407787	0.8367579908675801	0.8982843137254902	0.8664302600472813
282	1.0	0.0	1.0	1.0	1.0	0.8257713248638838	0.17422867513611615	1.0	0.8257713248638838	0.9045725646123258	0.9780646413665922	0.021935358633407787	0.8367579908675801	0.8982843137254902	0.8664302600472813
282	1.0	0.0	1.0	1.0	1.0	0.8257713248638838	0.17422867513611615	1.0	0.8257713248638838	0.9045725646123258	0.9780646413665922	0.021935358633407787	0.8367579908675801	0.8982843137254902	0.8664302600472813
282	1.0	0.0	1.0	1.0	1.0	0.8257713248638838	0.17422867513611615	1.0	0.8257713248638838	0.9045725646123258	0.9780646413665922	0.021935358633407787	0.8367579908675801	0.8982843137254902	0.8664302600472813
282	1.0	0.0	1.0	1.0	1.0	0.8257713248638838	0.17422867513611615	1.0	0.8257713248638838	0.9045725646123258	0.9780646413665922	0.021935358633407787	0.8367579908675801	0.8982843137254902	0.8664302600472813
282	1.0	0.0	1.0	1.0	1.0	0.8257713248638838	0.17422867513611615	1.0	0.8257713248638838	0.9045725646123258	0.9780646413665922	0.021935358633407787	0.8367579908675801	0.8982843137254902	0.8664302600472813
282	1.0	0.0	1.0	1.0	1.0	0.8257713248638838	0.17422867513611615	1.0	0.8257713248638838	0.9045725646123258	0.9780646413665922	0.021935358633407787	0.8367579908675801	0.8982843137254902	0.8664302600472813
282	1.0	0.0	1.0	1.0	1.0	0.8257713248638838	0.17422867513611615	1.0	0.8257713248638838	0.9045725646123258	0.9780646413665922	0.021935358633407787	0.8367579908675801	0.8982843137254902	0.8664302600472813
