# Supplementary material for: An Improved Hybrid Feature Selection Algorithm for Electric Charge Recovery Risk
Source: Hindawi journal article supplement (doi:10.1155/2020/8479341), 2020-08-28
Supplement: f1 [file 8479341.f1.zip › 8479341.f1/Experimental Results/201807/LBPSOSEE_SBS_results.csv]

features_num	Accuracy_high	Loss_high	Precission_high	Recall_high	F1_high	Accuracy_med	Loss_med	Precission_med	Recall_med	F1_med	Accuracy_low	Loss_low	Precission_low	Recall_low	F1_low
282	1	0	1	1	1	0.825771325	0.174228675	1	0.825771325	0.904572565	0.977385228	0.022614772	0.830124575	0.898284314	0.862860506
281	1	0	1	1	1	0.823956443	0.176043557	1	0.823956443	0.903482587	0.978355819	0.021644181	0.839633448	0.898284314	0.867969213
281	1	0	1	1	1	0.823956443	0.176043557	1	0.823956443	0.903482587	0.978355819	0.021644181	0.839633448	0.898284314	0.867969213
280	1	0	1	1	1	0.825771325	0.174228675	1	0.825771325	0.904572565	0.978355819	0.021644181	0.839633448	0.898284314	0.867969213
279	1	0	1	1	1	0.825771325	0.174228675	1	0.825771325	0.904572565	0.978452878	0.021547122	0.84059633	0.898284314	0.868483412
278	1	0	1	1	1	0.825771325	0.174228675	1	0.825771325	0.904572565	0.978452878	0.021547122	0.84059633	0.898284314	0.868483412
278	1	0	1	1	1	0.825771325	0.174228675	1	0.825771325	0.904572565	0.978452878	0.021547122	0.84059633	0.898284314	0.868483412
278	1	0	1	1	1	0.825771325	0.174228675	1	0.825771325	0.904572565	0.978452878	0.021547122	0.84059633	0.898284314	0.868483412
278	1	0	1	1	1	0.825771325	0.174228675	1	0.825771325	0.904572565	0.978452878	0.021547122	0.84059633	0.898284314	0.868483412
278	1	0	1	1	1	0.825771325	0.174228675	1	0.825771325	0.904572565	0.978452878	0.021547122	0.84059633	0.898284314	0.868483412
277	1	0	1	1	1	0.828153565	0.171846435	1	0.828153565	0.906	0.97914039	0.02085961	0.849710983	0.896341463	0.872403561
277	1	0	1	1	1	0.828153565	0.171846435	1	0.828153565	0.906	0.97914039	0.02085961	0.849710983	0.896341463	0.872403561
277	1	0	1	1	1	0.828153565	0.171846435	1	0.828153565	0.906	0.97914039	0.02085961	0.849710983	0.896341463	0.872403561
277	1	0	1	1	1	0.828153565	0.171846435	1	0.828153565	0.906	0.97914039	0.02085961	0.849710983	0.896341463	0.872403561
277	1	0	1	1	1	0.828153565	0.171846435	1	0.828153565	0.906	0.97914039	0.02085961	0.849710983	0.896341463	0.872403561
277	1	0	1	1	1	0.828153565	0.171846435	1	0.828153565	0.906	0.97914039	0.02085961	0.849710983	0.896341463	0.872403561
277	1	0	1	1	1	0.828153565	0.171846435	1	0.828153565	0.906	0.97914039	0.02085961	0.849710983	0.896341463	0.872403561
277	1	0	1	1	1	0.828153565	0.171846435	1	0.828153565	0.906	0.97914039	0.02085961	0.849710983	0.896341463	0.872403561
276	1	0	1	1	1	0.828153565	0.171846435	1	0.828153565	0.906	0.97914039	0.02085961	0.849710983	0.896341463	0.872403561
276	1	0	1	1	1	0.828153565	0.171846435	1	0.828153565	0.906	0.97914039	0.02085961	0.849710983	0.896341463	0.872403561
276	1	0	1	1	1	0.828153565	0.171846435	1	0.828153565	0.906	0.97914039	0.02085961	0.849710983	0.896341463	0.872403561
276	1	0	1	1	1	0.828153565	0.171846435	1	0.828153565	0.906	0.97914039	0.02085961	0.849710983	0.896341463	0.872403561
276	1	0	1	1	1	0.828153565	0.171846435	1	0.828153565	0.906	0.97914039	0.02085961	0.849710983	0.896341463	0.872403561
276	1	0	1	1	1	0.828153565	0.171846435	1	0.828153565	0.906	0.97914039	0.02085961	0.849710983	0.896341463	0.872403561
276	1	0	1	1	1	0.828153565	0.171846435	1	0.828153565	0.906	0.97914039	0.02085961	0.849710983	0.896341463	0.872403561
276	1	0	1	1	1	0.828153565	0.171846435	1	0.828153565	0.906	0.97914039	0.02085961	0.849710983	0.896341463	0.872403561
276	1	0	1	1	1	0.828153565	0.171846435	1	0.828153565	0.906	0.97914039	0.02085961	0.849710983	0.896341463	0.872403561
276	1	0	1	1	1	0.828153565	0.171846435	1	0.828153565	0.906	0.97914039	0.02085961	0.849710983	0.896341463	0.872403561
276	1	0	1	1	1	0.828153565	0.171846435	1	0.828153565	0.906	0.97914039	0.02085961	0.849710983	0.896341463	0.872403561
276	1	0	1	1	1	0.828153565	0.171846435	1	0.828153565	0.906	0.97914039	0.02085961	0.849710983	0.896341463	0.872403561
276	1	0	1	1	1	0.828153565	0.171846435	1	0.828153565	0.906	0.97914039	0.02085961	0.849710983	0.896341463	0.872403561
276	1	0	1	1	1	0.828153565	0.171846435	1	0.828153565	0.906	0.97914039	0.02085961	0.849710983	0.896341463	0.872403561
276	1	0	1	1	1	0.828153565	0.171846435	1	0.828153565	0.906	0.97914039	0.02085961	0.849710983	0.896341463	0.872403561
276	1	0	1	1	1	0.828153565	0.171846435	1	0.828153565	0.906	0.97914039	0.02085961	0.849710983	0.896341463	0.872403561
276	1	0	1	1	1	0.828153565	0.171846435	1	0.828153565	0.906	0.97914039	0.02085961	0.849710983	0.896341463	0.872403561
276	1	0	1	1	1	0.828153565	0.171846435	1	0.828153565	0.906	0.97914039	0.02085961	0.849710983	0.896341463	0.872403561
276	1	0	1	1	1	0.828153565	0.171846435	1	0.828153565	0.906	0.97914039	0.02085961	0.849710983	0.896341463	0.872403561
276	1	0	1	1	1	0.828153565	0.171846435	1	0.828153565	0.906	0.97914039	0.02085961	0.849710983	0.896341463	0.872403561
276	1	0	1	1	1	0.828153565	0.171846435	1	0.828153565	0.906	0.97914039	0.02085961	0.849710983	0.896341463	0.872403561
276	1	0	1	1	1	0.828153565	0.171846435	1	0.828153565	0.906	0.97914039	0.02085961	0.849710983	0.896341463	0.872403561
276	1	0	1	1	1	0.828153565	0.171846435	1	0.828153565	0.906	0.97914039	0.02085961	0.849710983	0.896341463	0.872403561
276	1	0	1	1	1	0.828153565	0.171846435	1	0.828153565	0.906	0.97914039	0.02085961	0.849710983	0.896341463	0.872403561
276	1	0	1	1	1	0.828153565	0.171846435	1	0.828153565	0.906	0.97914039	0.02085961	0.849710983	0.896341463	0.872403561
276	1	0	1	1	1	0.828153565	0.171846435	1	0.828153565	0.906	0.97914039	0.02085961	0.849710983	0.896341463	0.872403561
276	1	0	1	1	1	0.828153565	0.171846435	1	0.828153565	0.906	0.97914039	0.02085961	0.849710983	0.896341463	0.872403561
276	1	0	1	1	1	0.828153565	0.171846435	1	0.828153565	0.906	0.97914039	0.02085961	0.849710983	0.896341463	0.872403561
276	1	0	1	1	1	0.828153565	0.171846435	1	0.828153565	0.906	0.97914039	0.02085961	0.849710983	0.896341463	0.872403561
276	1	0	1	1	1	0.828153565	0.171846435	1	0.828153565	0.906	0.97914039	0.02085961	0.849710983	0.896341463	0.872403561
276	1	0	1	1	1	0.828153565	0.171846435	1	0.828153565	0.906	0.97914039	0.02085961	0.849710983	0.896341463	0.872403561
276	1	0	1	1	1	0.828153565	0.171846435	1	0.828153565	0.906	0.97914039	0.02085961	0.849710983	0.896341463	0.872403561
276	1	0	1	1	1	0.828153565	0.171846435	1	0.828153565	0.906	0.97914039	0.02085961	0.849710983	0.896341463	0.872403561
276	1	0	1	1	1	0.828153565	0.171846435	1	0.828153565	0.906	0.97914039	0.02085961	0.849710983	0.896341463	0.872403561
276	1	0	1	1	1	0.828153565	0.171846435	1	0.828153565	0.906	0.97914039	0.02085961	0.849710983	0.896341463	0.872403561
276	1	0	1	1	1	0.828153565	0.171846435	1	0.828153565	0.906	0.97914039	0.02085961	0.849710983	0.896341463	0.872403561
276	1	0	1	1	1	0.828153565	0.171846435	1	0.828153565	0.906	0.97914039	0.02085961	0.849710983	0.896341463	0.872403561
276	1	0	1	1	1	0.828153565	0.171846435	1	0.828153565	0.906	0.97914039	0.02085961	0.849710983	0.896341463	0.872403561
276	1	0	1	1	1	0.828153565	0.171846435	1	0.828153565	0.906	0.97914039	0.02085961	0.849710983	0.896341463	0.872403561
276	1	0	1	1	1	0.828153565	0.171846435	1	0.828153565	0.906	0.97914039	0.02085961	0.849710983	0.896341463	0.872403561
276	1	0	1	1	1	0.828153565	0.171846435	1	0.828153565	0.906	0.97914039	0.02085961	0.849710983	0.896341463	0.872403561
276	1	0	1	1	1	0.828153565	0.171846435	1	0.828153565	0.906	0.97914039	0.02085961	0.849710983	0.896341463	0.872403561
276	1	0	1	1	1	0.828153565	0.171846435	1	0.828153565	0.906	0.97914039	0.02085961	0.849710983	0.896341463	0.872403561
276	1	0	1	1	1	0.828153565	0.171846435	1	0.828153565	0.906	0.97914039	0.02085961	0.849710983	0.896341463	0.872403561
276	1	0	1	1	1	0.828153565	0.171846435	1	0.828153565	0.906	0.97914039	0.02085961	0.849710983	0.896341463	0.872403561
276	1	0	1	1	1	0.828153565	0.171846435	1	0.828153565	0.906	0.97914039	0.02085961	0.849710983	0.896341463	0.872403561
276	1	0	1	1	1	0.828153565	0.171846435	1	0.828153565	0.906	0.97914039	0.02085961	0.849710983	0.896341463	0.872403561
276	1	0	1	1	1	0.828153565	0.171846435	1	0.828153565	0.906	0.97914039	0.02085961	0.849710983	0.896341463	0.872403561
276	1	0	1	1	1	0.828153565	0.171846435	1	0.828153565	0.906	0.97914039	0.02085961	0.849710983	0.896341463	0.872403561
276	1	0	1	1	1	0.828153565	0.171846435	1	0.828153565	0.906	0.97914039	0.02085961	0.849710983	0.896341463	0.872403561
276	1	0	1	1	1	0.828153565	0.171846435	1	0.828153565	0.906	0.97914039	0.02085961	0.849710983	0.896341463	0.872403561
276	1	0	1	1	1	0.828153565	0.171846435	1	0.828153565	0.906	0.97914039	0.02085961	0.849710983	0.896341463	0.872403561
276	1	0	1	1	1	0.828153565	0.171846435	1	0.828153565	0.906	0.97914039	0.02085961	0.849710983	0.896341463	0.872403561
276	1	0	1	1	1	0.828153565	0.171846435	1	0.828153565	0.906	0.97914039	0.02085961	0.849710983	0.896341463	0.872403561
276	1	0	1	1	1	0.828153565	0.171846435	1	0.828153565	0.906	0.97914039	0.02085961	0.849710983	0.896341463	0.872403561
276	1	0	1	1	1	0.828153565	0.171846435	1	0.828153565	0.906	0.97914039	0.02085961	0.849710983	0.896341463	0.872403561
276	1	0	1	1	1	0.828153565	0.171846435	1	0.828153565	0.906	0.97914039	0.02085961	0.849710983	0.896341463	0.872403561
276	1	0	1	1	1	0.828153565	0.171846435	1	0.828153565	0.906	0.97914039	0.02085961	0.849710983	0.896341463	0.872403561
276	1	0	1	1	1	0.828153565	0.171846435	1	0.828153565	0.906	0.97914039	0.02085961	0.849710983	0.896341463	0.872403561
276	1	0	1	1	1	0.828153565	0.171846435	1	0.828153565	0.906	0.97914039	0.02085961	0.849710983	0.896341463	0.872403561
276	1	0	1	1	1	0.828153565	0.171846435	1	0.828153565	0.906	0.97914039	0.02085961	0.849710983	0.896341463	0.872403561
276	1	0	1	1	1	0.828153565	0.171846435	1	0.828153565	0.906	0.97914039	0.02085961	0.849710983	0.896341463	0.872403561
276	1	0	1	1	1	0.828153565	0.171846435	1	0.828153565	0.906	0.97914039	0.02085961	0.849710983	0.896341463	0.872403561
276	1	0	1	1	1	0.828153565	0.171846435	1	0.828153565	0.906	0.97914039	0.02085961	0.849710983	0.896341463	0.872403561
276	1	0	1	1	1	0.828153565	0.171846435	1	0.828153565	0.906	0.97914039	0.02085961	0.849710983	0.896341463	0.872403561
276	1	0	1	1	1	0.828153565	0.171846435	1	0.828153565	0.906	0.97914039	0.02085961	0.849710983	0.896341463	0.872403561
276	1	0	1	1	1	0.828153565	0.171846435	1	0.828153565	0.906	0.97914039	0.02085961	0.849710983	0.896341463	0.872403561
276	1	0	1	1	1	0.828153565	0.171846435	1	0.828153565	0.906	0.97914039	0.02085961	0.849710983	0.896341463	0.872403561
276	1	0	1	1	1	0.828153565	0.171846435	1	0.828153565	0.906	0.97914039	0.02085961	0.849710983	0.896341463	0.872403561
276	1	0	1	1	1	0.828153565	0.171846435	1	0.828153565	0.906	0.97914039	0.02085961	0.849710983	0.896341463	0.872403561
276	1	0	1	1	1	0.828153565	0.171846435	1	0.828153565	0.906	0.97914039	0.02085961	0.849710983	0.896341463	0.872403561
276	1	0	1	1	1	0.828153565	0.171846435	1	0.828153565	0.906	0.97914039	0.02085961	0.849710983	0.896341463	0.872403561
276	1	0	1	1	1	0.828153565	0.171846435	1	0.828153565	0.906	0.97914039	0.02085961	0.849710983	0.896341463	0.872403561
276	1	0	1	1	1	0.828153565	0.171846435	1	0.828153565	0.906	0.97914039	0.02085961	0.849710983	0.896341463	0.872403561
276	1	0	1	1	1	0.828153565	0.171846435	1	0.828153565	0.906	0.97914039	0.02085961	0.849710983	0.896341463	0.872403561
276	1	0	1	1	1	0.828153565	0.171846435	1	0.828153565	0.906	0.97914039	0.02085961	0.849710983	0.896341463	0.872403561
276	1	0	1	1	1	0.828153565	0.171846435	1	0.828153565	0.906	0.97914039	0.02085961	0.849710983	0.896341463	0.872403561
276	1	0	1	1	1	0.828153565	0.171846435	1	0.828153565	0.906	0.97914039	0.02085961	0.849710983	0.896341463	0.872403561
276	1	0	1	1	1	0.828153565	0.171846435	1	0.828153565	0.906	0.97914039	0.02085961	0.849710983	0.896341463	0.872403561
276	1	0	1	1	1	0.828153565	0.171846435	1	0.828153565	0.906	0.97914039	0.02085961	0.849710983	0.896341463	0.872403561
276	1	0	1	1	1	0.828153565	0.171846435	1	0.828153565	0.906	0.97914039	0.02085961	0.849710983	0.896341463	0.872403561
276	1	0	1	1	1	0.828153565	0.171846435	1	0.828153565	0.906	0.97914039	0.02085961	0.849710983	0.896341463	0.872403561
276	1	0	1	1	1	0.828153565	0.171846435	1	0.828153565	0.906	0.97914039	0.02085961	0.849710983	0.896341463	0.872403561
276	1	0	1	1	1	0.828153565	0.171846435	1	0.828153565	0.906	0.97914039	0.02085961	0.849710983	0.896341463	0.872403561
276	1	0	1	1	1	0.828153565	0.171846435	1	0.828153565	0.906	0.97914039	0.02085961	0.849710983	0.896341463	0.872403561
276	1	0	1	1	1	0.828153565	0.171846435	1	0.828153565	0.906	0.97914039	0.02085961	0.849710983	0.896341463	0.872403561
276	1	0	1	1	1	0.828153565	0.171846435	1	0.828153565	0.906	0.97914039	0.02085961	0.849710983	0.896341463	0.872403561
276	1	0	1	1	1	0.828153565	0.171846435	1	0.828153565	0.906	0.97914039	0.02085961	0.849710983	0.896341463	0.872403561
276	1	0	1	1	1	0.828153565	0.171846435	1	0.828153565	0.906	0.97914039	0.02085961	0.849710983	0.896341463	0.872403561
276	1	0	1	1	1	0.828153565	0.171846435	1	0.828153565	0.906	0.97914039	0.02085961	0.849710983	0.896341463	0.872403561
276	1	0	1	1	1	0.828153565	0.171846435	1	0.828153565	0.906	0.97914039	0.02085961	0.849710983	0.896341463	0.872403561
276	1	0	1	1	1	0.828153565	0.171846435	1	0.828153565	0.906	0.97914039	0.02085961	0.849710983	0.896341463	0.872403561
276	1	0	1	1	1	0.828153565	0.171846435	1	0.828153565	0.906	0.97914039	0.02085961	0.849710983	0.896341463	0.872403561
276	1	0	1	1	1	0.828153565	0.171846435	1	0.828153565	0.906	0.97914039	0.02085961	0.849710983	0.896341463	0.872403561
275	1	0	1	1	1	0.828153565	0.171846435	1	0.828153565	0.906	0.97914039	0.02085961	0.849710983	0.896341463	0.872403561
275	1	0	1	1	1	0.828153565	0.171846435	1	0.828153565	0.906	0.97914039	0.02085961	0.849710983	0.896341463	0.872403561
275	1	0	1	1	1	0.828153565	0.171846435	1	0.828153565	0.906	0.97914039	0.02085961	0.849710983	0.896341463	0.872403561
275	1	0	1	1	1	0.828153565	0.171846435	1	0.828153565	0.906	0.97914039	0.02085961	0.849710983	0.896341463	0.872403561
275	1	0	1	1	1	0.828153565	0.171846435	1	0.828153565	0.906	0.97914039	0.02085961	0.849710983	0.896341463	0.872403561
274	1	0	1	1	1	0.829981718	0.170018282	1	0.829981718	0.907092907	0.97914039	0.02085961	0.849710983	0.896341463	0.872403561
274	1	0	1	1	1	0.829981718	0.170018282	1	0.829981718	0.907092907	0.97914039	0.02085961	0.849710983	0.896341463	0.872403561
274	1	0	1	1	1	0.829981718	0.170018282	1	0.829981718	0.907092907	0.97914039	0.02085961	0.849710983	0.896341463	0.872403561
274	1	0	1	1	1	0.829981718	0.170018282	1	0.829981718	0.907092907	0.97914039	0.02085961	0.849710983	0.896341463	0.872403561
274	1	0	1	1	1	0.829981718	0.170018282	1	0.829981718	0.907092907	0.97914039	0.02085961	0.849710983	0.896341463	0.872403561
274	1	0	1	1	1	0.829981718	0.170018282	1	0.829981718	0.907092907	0.97914039	0.02085961	0.849710983	0.896341463	0.872403561
274	1	0	1	1	1	0.829981718	0.170018282	1	0.829981718	0.907092907	0.97914039	0.02085961	0.849710983	0.896341463	0.872403561
274	1	0	1	1	1	0.829981718	0.170018282	1	0.829981718	0.907092907	0.97914039	0.02085961	0.849710983	0.896341463	0.872403561
274	1	0	1	1	1	0.829981718	0.170018282	1	0.829981718	0.907092907	0.97914039	0.02085961	0.849710983	0.896341463	0.872403561
274	1	0	1	1	1	0.829981718	0.170018282	1	0.829981718	0.907092907	0.97914039	0.02085961	0.849710983	0.896341463	0.872403561
274	1	0	1	1	1	0.829981718	0.170018282	1	0.829981718	0.907092907	0.97914039	0.02085961	0.849710983	0.896341463	0.872403561
274	1	0	1	1	1	0.829981718	0.170018282	1	0.829981718	0.907092907	0.97914039	0.02085961	0.849710983	0.896341463	0.872403561
274	1	0	1	1	1	0.829981718	0.170018282	1	0.829981718	0.907092907	0.97914039	0.02085961	0.849710983	0.896341463	0.872403561
274	1	0	1	1	1	0.829981718	0.170018282	1	0.829981718	0.907092907	0.97914039	0.02085961	0.849710983	0.896341463	0.872403561
274	1	0	1	1	1	0.829981718	0.170018282	1	0.829981718	0.907092907	0.97914039	0.02085961	0.849710983	0.896341463	0.872403561
274	1	0	1	1	1	0.829981718	0.170018282	1	0.829981718	0.907092907	0.97914039	0.02085961	0.849710983	0.896341463	0.872403561
274	1	0	1	1	1	0.829981718	0.170018282	1	0.829981718	0.907092907	0.97914039	0.02085961	0.849710983	0.896341463	0.872403561
274	1	0	1	1	1	0.829981718	0.170018282	1	0.829981718	0.907092907	0.97914039	0.02085961	0.849710983	0.896341463	0.872403561
274	1	0	1	1	1	0.829981718	0.170018282	1	0.829981718	0.907092907	0.97914039	0.02085961	0.849710983	0.896341463	0.872403561
274	1	0	1	1	1	0.829981718	0.170018282	1	0.829981718	0.907092907	0.97914039	0.02085961	0.849710983	0.896341463	0.872403561
274	1	0	1	1	1	0.829981718	0.170018282	1	0.829981718	0.907092907	0.97914039	0.02085961	0.849710983	0.896341463	0.872403561
274	1	0	1	1	1	0.829981718	0.170018282	1	0.829981718	0.907092907	0.97914039	0.02085961	0.849710983	0.896341463	0.872403561
274	1	0	1	1	1	0.829981718	0.170018282	1	0.829981718	0.907092907	0.97914039	0.02085961	0.849710983	0.896341463	0.872403561
274	1	0	1	1	1	0.829981718	0.170018282	1	0.829981718	0.907092907	0.97914039	0.02085961	0.849710983	0.896341463	0.872403561
274	1	0	1	1	1	0.829981718	0.170018282	1	0.829981718	0.907092907	0.97914039	0.02085961	0.849710983	0.896341463	0.872403561
274	1	0	1	1	1	0.829981718	0.170018282	1	0.829981718	0.907092907	0.97914039	0.02085961	0.849710983	0.896341463	0.872403561
274	1	0	1	1	1	0.829981718	0.170018282	1	0.829981718	0.907092907	0.97914039	0.02085961	0.849710983	0.896341463	0.872403561
274	1	0	1	1	1	0.829981718	0.170018282	1	0.829981718	0.907092907	0.97914039	0.02085961	0.849710983	0.896341463	0.872403561
274	1	0	1	1	1	0.829981718	0.170018282	1	0.829981718	0.907092907	0.97914039	0.02085961	0.849710983	0.896341463	0.872403561
274	1	0	1	1	1	0.829981718	0.170018282	1	0.829981718	0.907092907	0.97914039	0.02085961	0.849710983	0.896341463	0.872403561
274	1	0	1	1	1	0.829981718	0.170018282	1	0.829981718	0.907092907	0.97914039	0.02085961	0.849710983	0.896341463	0.872403561
274	1	0	1	1	1	0.829981718	0.170018282	1	0.829981718	0.907092907	0.97914039	0.02085961	0.849710983	0.896341463	0.872403561
274	1	0	1	1	1	0.829981718	0.170018282	1	0.829981718	0.907092907	0.97914039	0.02085961	0.849710983	0.896341463	0.872403561
274	1	0	1	1	1	0.829981718	0.170018282	1	0.829981718	0.907092907	0.97914039	0.02085961	0.849710983	0.896341463	0.872403561
274	1	0	1	1	1	0.829981718	0.170018282	1	0.829981718	0.907092907	0.97914039	0.02085961	0.849710983	0.896341463	0.872403561
274	1	0	1	1	1	0.829981718	0.170018282	1	0.829981718	0.907092907	0.97914039	0.02085961	0.849710983	0.896341463	0.872403561
274	1	0	1	1	1	0.829981718	0.170018282	1	0.829981718	0.907092907	0.97914039	0.02085961	0.849710983	0.896341463	0.872403561
274	1	0	1	1	1	0.829981718	0.170018282	1	0.829981718	0.907092907	0.97914039	0.02085961	0.849710983	0.896341463	0.872403561
274	1	0	1	1	1	0.829981718	0.170018282	1	0.829981718	0.907092907	0.97914039	0.02085961	0.849710983	0.896341463	0.872403561
274	1	0	1	1	1	0.829981718	0.170018282	1	0.829981718	0.907092907	0.97914039	0.02085961	0.849710983	0.896341463	0.872403561
274	1	0	1	1	1	0.829981718	0.170018282	1	0.829981718	0.907092907	0.97914039	0.02085961	0.849710983	0.896341463	0.872403561
274	1	0	1	1	1	0.829981718	0.170018282	1	0.829981718	0.907092907	0.97914039	0.02085961	0.849710983	0.896341463	0.872403561
274	1	0	1	1	1	0.829981718	0.170018282	1	0.829981718	0.907092907	0.97914039	0.02085961	0.849710983	0.896341463	0.872403561
274	1	0	1	1	1	0.829981718	0.170018282	1	0.829981718	0.907092907	0.97914039	0.02085961	0.849710983	0.896341463	0.872403561
274	1	0	1	1	1	0.829981718	0.170018282	1	0.829981718	0.907092907	0.97914039	0.02085961	0.849710983	0.896341463	0.872403561
274	1	0	1	1	1	0.829981718	0.170018282	1	0.829981718	0.907092907	0.97914039	0.02085961	0.849710983	0.896341463	0.872403561
274	1	0	1	1	1	0.829981718	0.170018282	1	0.829981718	0.907092907	0.97914039	0.02085961	0.849710983	0.896341463	0.872403561
274	1	0	1	1	1	0.829981718	0.170018282	1	0.829981718	0.907092907	0.97914039	0.02085961	0.849710983	0.896341463	0.872403561
274	1	0	1	1	1	0.829981718	0.170018282	1	0.829981718	0.907092907	0.97914039	0.02085961	0.849710983	0.896341463	0.872403561
274	1	0	1	1	1	0.829981718	0.170018282	1	0.829981718	0.907092907	0.97914039	0.02085961	0.849710983	0.896341463	0.872403561
274	1	0	1	1	1	0.829981718	0.170018282	1	0.829981718	0.907092907	0.97914039	0.02085961	0.849710983	0.896341463	0.872403561
274	1	0	1	1	1	0.829981718	0.170018282	1	0.829981718	0.907092907	0.97914039	0.02085961	0.849710983	0.896341463	0.872403561
274	1	0	1	1	1	0.829981718	0.170018282	1	0.829981718	0.907092907	0.97914039	0.02085961	0.849710983	0.896341463	0.872403561
274	1	0	1	1	1	0.829981718	0.170018282	1	0.829981718	0.907092907	0.97914039	0.02085961	0.849710983	0.896341463	0.872403561
274	1	0	1	1	1	0.829981718	0.170018282	1	0.829981718	0.907092907	0.97914039	0.02085961	0.849710983	0.896341463	0.872403561
274	1	0	1	1	1	0.829981718	0.170018282	1	0.829981718	0.907092907	0.97914039	0.02085961	0.849710983	0.896341463	0.872403561
274	1	0	1	1	1	0.829981718	0.170018282	1	0.829981718	0.907092907	0.97914039	0.02085961	0.849710983	0.896341463	0.872403561
274	1	0	1	1	1	0.829981718	0.170018282	1	0.829981718	0.907092907	0.97914039	0.02085961	0.849710983	0.896341463	0.872403561
274	1	0	1	1	1	0.829981718	0.170018282	1	0.829981718	0.907092907	0.97914039	0.02085961	0.849710983	0.896341463	0.872403561
274	1	0	1	1	1	0.829981718	0.170018282	1	0.829981718	0.907092907	0.97914039	0.02085961	0.849710983	0.896341463	0.872403561
274	1	0	1	1	1	0.829981718	0.170018282	1	0.829981718	0.907092907	0.97914039	0.02085961	0.849710983	0.896341463	0.872403561
274	1	0	1	1	1	0.829981718	0.170018282	1	0.829981718	0.907092907	0.97914039	0.02085961	0.849710983	0.896341463	0.872403561
274	1	0	1	1	1	0.829981718	0.170018282	1	0.829981718	0.907092907	0.97914039	0.02085961	0.849710983	0.896341463	0.872403561
274	1	0	1	1	1	0.829981718	0.170018282	1	0.829981718	0.907092907	0.97914039	0.02085961	0.849710983	0.896341463	0.872403561
274	1	0	1	1	1	0.829981718	0.170018282	1	0.829981718	0.907092907	0.97914039	0.02085961	0.849710983	0.896341463	0.872403561
274	1	0	1	1	1	0.829981718	0.170018282	1	0.829981718	0.907092907	0.97914039	0.02085961	0.849710983	0.896341463	0.872403561
274	1	0	1	1	1	0.829981718	0.170018282	1	0.829981718	0.907092907	0.97914039	0.02085961	0.849710983	0.896341463	0.872403561
274	1	0	1	1	1	0.829981718	0.170018282	1	0.829981718	0.907092907	0.97914039	0.02085961	0.849710983	0.896341463	0.872403561
274	1	0	1	1	1	0.829981718	0.170018282	1	0.829981718	0.907092907	0.97914039	0.02085961	0.849710983	0.896341463	0.872403561
274	1	0	1	1	1	0.829981718	0.170018282	1	0.829981718	0.907092907	0.97914039	0.02085961	0.849710983	0.896341463	0.872403561
274	1	0	1	1	1	0.829981718	0.170018282	1	0.829981718	0.907092907	0.97914039	0.02085961	0.849710983	0.896341463	0.872403561
274	1	0	1	1	1	0.829981718	0.170018282	1	0.829981718	0.907092907	0.97914039	0.02085961	0.849710983	0.896341463	0.872403561
274	1	0	1	1	1	0.829981718	0.170018282	1	0.829981718	0.907092907	0.97914039	0.02085961	0.849710983	0.896341463	0.872403561
274	1	0	1	1	1	0.829981718	0.170018282	1	0.829981718	0.907092907	0.97914039	0.02085961	0.849710983	0.896341463	0.872403561
274	1	0	1	1	1	0.829981718	0.170018282	1	0.829981718	0.907092907	0.97914039	0.02085961	0.849710983	0.896341463	0.872403561
274	1	0	1	1	1	0.829981718	0.170018282	1	0.829981718	0.907092907	0.97914039	0.02085961	0.849710983	0.896341463	0.872403561
274	1	0	1	1	1	0.829981718	0.170018282	1	0.829981718	0.907092907	0.97914039	0.02085961	0.849710983	0.896341463	0.872403561
274	1	0	1	1	1	0.829981718	0.170018282	1	0.829981718	0.907092907	0.97914039	0.02085961	0.849710983	0.896341463	0.872403561
274	1	0	1	1	1	0.829981718	0.170018282	1	0.829981718	0.907092907	0.97914039	0.02085961	0.849710983	0.896341463	0.872403561
274	1	0	1	1	1	0.829981718	0.170018282	1	0.829981718	0.907092907	0.97914039	0.02085961	0.849710983	0.896341463	0.872403561
274	1	0	1	1	1	0.829981718	0.170018282	1	0.829981718	0.907092907	0.97914039	0.02085961	0.849710983	0.896341463	0.872403561
274	1	0	1	1	1	0.829981718	0.170018282	1	0.829981718	0.907092907	0.97914039	0.02085961	0.849710983	0.896341463	0.872403561
274	1	0	1	1	1	0.829981718	0.170018282	1	0.829981718	0.907092907	0.97914039	0.02085961	0.849710983	0.896341463	0.872403561
274	1	0	1	1	1	0.829981718	0.170018282	1	0.829981718	0.907092907	0.97914039	0.02085961	0.849710983	0.896341463	0.872403561
274	1	0	1	1	1	0.829981718	0.170018282	1	0.829981718	0.907092907	0.97914039	0.02085961	0.849710983	0.896341463	0.872403561
274	1	0	1	1	1	0.829981718	0.170018282	1	0.829981718	0.907092907	0.97914039	0.02085961	0.849710983	0.896341463	0.872403561
274	1	0	1	1	1	0.829981718	0.170018282	1	0.829981718	0.907092907	0.97914039	0.02085961	0.849710983	0.896341463	0.872403561
274	1	0	1	1	1	0.829981718	0.170018282	1	0.829981718	0.907092907	0.97914039	0.02085961	0.849710983	0.896341463	0.872403561
274	1	0	1	1	1	0.829981718	0.170018282	1	0.829981718	0.907092907	0.97914039	0.02085961	0.849710983	0.896341463	0.872403561
274	1	0	1	1	1	0.829981718	0.170018282	1	0.829981718	0.907092907	0.97914039	0.02085961	0.849710983	0.896341463	0.872403561
274	1	0	1	1	1	0.829981718	0.170018282	1	0.829981718	0.907092907	0.97914039	0.02085961	0.849710983	0.896341463	0.872403561
274	1	0	1	1	1	0.829981718	0.170018282	1	0.829981718	0.907092907	0.97914039	0.02085961	0.849710983	0.896341463	0.872403561
274	1	0	1	1	1	0.829981718	0.170018282	1	0.829981718	0.907092907	0.97914039	0.02085961	0.849710983	0.896341463	0.872403561
274	1	0	1	1	1	0.829981718	0.170018282	1	0.829981718	0.907092907	0.97914039	0.02085961	0.849710983	0.896341463	0.872403561
274	1	0	1	1	1	0.829981718	0.170018282	1	0.829981718	0.907092907	0.97914039	0.02085961	0.849710983	0.896341463	0.872403561
273	1	0	1	1	1	0.841818182	0.158181818	1	0.841818182	0.914116486	0.97796972	0.02203028	0.835990888	0.898408813	0.866076696
272	1	0	1	1	1	0.763809524	0.236190476	1	0.763809524	0.866090713	0.986736373	0.013263627	0.927272727	0.908551069	0.917816437
271	1	0	1	1	1	0.763809524	0.236190476	1	0.763809524	0.866090713	0.986930003	0.013069997	0.929526124	0.908551069	0.918918919
271	1	0	1	1	1	0.763809524	0.236190476	1	0.763809524	0.866090713	0.986930003	0.013069997	0.929526124	0.908551069	0.918918919
271	1	0	1	1	1	0.763809524	0.236190476	1	0.763809524	0.866090713	0.986930003	0.013069997	0.929526124	0.908551069	0.918918919
270	1	0	1	1	1	0.765714286	0.234285714	1	0.765714286	0.867313916	0.986930003	0.013069997	0.929526124	0.908551069	0.918918919
270	1	0	1	1	1	0.765714286	0.234285714	1	0.765714286	0.867313916	0.986930003	0.013069997	0.929526124	0.908551069	0.918918919
270	1	0	1	1	1	0.765714286	0.234285714	1	0.765714286	0.867313916	0.986930003	0.013069997	0.929526124	0.908551069	0.918918919
270	1	0	1	1	1	0.765714286	0.234285714	1	0.765714286	0.867313916	0.986930003	0.013069997	0.929526124	0.908551069	0.918918919
270	1	0	1	1	1	0.765714286	0.234285714	1	0.765714286	0.867313916	0.986930003	0.013069997	0.929526124	0.908551069	0.918918919
270	1	0	1	1	1	0.765714286	0.234285714	1	0.765714286	0.867313916	0.986930003	0.013069997	0.929526124	0.908551069	0.918918919
270	1	0	1	1	1	0.765714286	0.234285714	1	0.765714286	0.867313916	0.986930003	0.013069997	0.929526124	0.908551069	0.918918919
270	1	0	1	1	1	0.765714286	0.234285714	1	0.765714286	0.867313916	0.986930003	0.013069997	0.929526124	0.908551069	0.918918919
270	1	0	1	1	1	0.765714286	0.234285714	1	0.765714286	0.867313916	0.986930003	0.013069997	0.929526124	0.908551069	0.918918919
270	1	0	1	1	1	0.765714286	0.234285714	1	0.765714286	0.867313916	0.986930003	0.013069997	0.929526124	0.908551069	0.918918919
270	1	0	1	1	1	0.765714286	0.234285714	1	0.765714286	0.867313916	0.986930003	0.013069997	0.929526124	0.908551069	0.918918919
270	1	0	1	1	1	0.765714286	0.234285714	1	0.765714286	0.867313916	0.986930003	0.013069997	0.929526124	0.908551069	0.918918919
269	1	0	1	1	1	0.785571142	0.214428858	1	0.785571142	0.879910213	0.987445678	0.012554322	0.943509615	0.90437788	0.923529412
269	1	0	1	1	1	0.785571142	0.214428858	1	0.785571142	0.879910213	0.987445678	0.012554322	0.943509615	0.90437788	0.923529412
269	1	0	1	1	1	0.785571142	0.214428858	1	0.785571142	0.879910213	0.987445678	0.012554322	0.943509615	0.90437788	0.923529412
269	1	0	1	1	1	0.785571142	0.214428858	1	0.785571142	0.879910213	0.987445678	0.012554322	0.943509615	0.90437788	0.923529412
269	1	0	1	1	1	0.785571142	0.214428858	1	0.785571142	0.879910213	0.987445678	0.012554322	0.943509615	0.90437788	0.923529412
269	1	0	1	1	1	0.785571142	0.214428858	1	0.785571142	0.879910213	0.987445678	0.012554322	0.943509615	0.90437788	0.923529412
269	1	0	1	1	1	0.785571142	0.214428858	1	0.785571142	0.879910213	0.987445678	0.012554322	0.943509615	0.90437788	0.923529412
269	1	0	1	1	1	0.785571142	0.214428858	1	0.785571142	0.879910213	0.987445678	0.012554322	0.943509615	0.90437788	0.923529412
269	1	0	1	1	1	0.785571142	0.214428858	1	0.785571142	0.879910213	0.987445678	0.012554322	0.943509615	0.90437788	0.923529412
269	1	0	1	1	1	0.785571142	0.214428858	1	0.785571142	0.879910213	0.987445678	0.012554322	0.943509615	0.90437788	0.923529412
269	1	0	1	1	1	0.785571142	0.214428858	1	0.785571142	0.879910213	0.987445678	0.012554322	0.943509615	0.90437788	0.923529412
269	1	0	1	1	1	0.785571142	0.214428858	1	0.785571142	0.879910213	0.987445678	0.012554322	0.943509615	0.90437788	0.923529412
269	1	0	1	1	1	0.785571142	0.214428858	1	0.785571142	0.879910213	0.987445678	0.012554322	0.943509615	0.90437788	0.923529412
269	1	0	1	1	1	0.785571142	0.214428858	1	0.785571142	0.879910213	0.987445678	0.012554322	0.943509615	0.90437788	0.923529412
269	1	0	1	1	1	0.785571142	0.214428858	1	0.785571142	0.879910213	0.987445678	0.012554322	0.943509615	0.90437788	0.923529412
269	1	0	1	1	1	0.785571142	0.214428858	1	0.785571142	0.879910213	0.987445678	0.012554322	0.943509615	0.90437788	0.923529412
269	1	0	1	1	1	0.785571142	0.214428858	1	0.785571142	0.879910213	0.987445678	0.012554322	0.943509615	0.90437788	0.923529412
269	1	0	1	1	1	0.785571142	0.214428858	1	0.785571142	0.879910213	0.987445678	0.012554322	0.943509615	0.90437788	0.923529412
269	1	0	1	1	1	0.785571142	0.214428858	1	0.785571142	0.879910213	0.987445678	0.012554322	0.943509615	0.90437788	0.923529412
269	1	0	1	1	1	0.785571142	0.214428858	1	0.785571142	0.879910213	0.987445678	0.012554322	0.943509615	0.90437788	0.923529412
269	1	0	1	1	1	0.785571142	0.214428858	1	0.785571142	0.879910213	0.987445678	0.012554322	0.943509615	0.90437788	0.923529412
269	1	0	1	1	1	0.785571142	0.214428858	1	0.785571142	0.879910213	0.987445678	0.012554322	0.943509615	0.90437788	0.923529412
269	1	0	1	1	1	0.785571142	0.214428858	1	0.785571142	0.879910213	0.987445678	0.012554322	0.943509615	0.90437788	0.923529412
269	1	0	1	1	1	0.785571142	0.214428858	1	0.785571142	0.879910213	0.987445678	0.012554322	0.943509615	0.90437788	0.923529412
269	1	0	1	1	1	0.785571142	0.214428858	1	0.785571142	0.879910213	0.987445678	0.012554322	0.943509615	0.90437788	0.923529412
269	1	0	1	1	1	0.785571142	0.214428858	1	0.785571142	0.879910213	0.987445678	0.012554322	0.943509615	0.90437788	0.923529412
269	1	0	1	1	1	0.785571142	0.214428858	1	0.785571142	0.879910213	0.987445678	0.012554322	0.943509615	0.90437788	0.923529412
269	1	0	1	1	1	0.785571142	0.214428858	1	0.785571142	0.879910213	0.987445678	0.012554322	0.943509615	0.90437788	0.923529412
269	1	0	1	1	1	0.785571142	0.214428858	1	0.785571142	0.879910213	0.987445678	0.012554322	0.943509615	0.90437788	0.923529412
269	1	0	1	1	1	0.785571142	0.214428858	1	0.785571142	0.879910213	0.987445678	0.012554322	0.943509615	0.90437788	0.923529412
269	1	0	1	1	1	0.785571142	0.214428858	1	0.785571142	0.879910213	0.987445678	0.012554322	0.943509615	0.90437788	0.923529412
269	1	0	1	1	1	0.785571142	0.214428858	1	0.785571142	0.879910213	0.987445678	0.012554322	0.943509615	0.90437788	0.923529412
269	1	0	1	1	1	0.785571142	0.214428858	1	0.785571142	0.879910213	0.987445678	0.012554322	0.943509615	0.90437788	0.923529412
269	1	0	1	1	1	0.785571142	0.214428858	1	0.785571142	0.879910213	0.987445678	0.012554322	0.943509615	0.90437788	0.923529412
269	1	0	1	1	1	0.785571142	0.214428858	1	0.785571142	0.879910213	0.987445678	0.012554322	0.943509615	0.90437788	0.923529412
269	1	0	1	1	1	0.785571142	0.214428858	1	0.785571142	0.879910213	0.987445678	0.012554322	0.943509615	0.90437788	0.923529412
269	1	0	1	1	1	0.785571142	0.214428858	1	0.785571142	0.879910213	0.987445678	0.012554322	0.943509615	0.90437788	0.923529412
269	1	0	1	1	1	0.785571142	0.214428858	1	0.785571142	0.879910213	0.987445678	0.012554322	0.943509615	0.90437788	0.923529412
269	1	0	1	1	1	0.785571142	0.214428858	1	0.785571142	0.879910213	0.987445678	0.012554322	0.943509615	0.90437788	0.923529412
269	1	0	1	1	1	0.785571142	0.214428858	1	0.785571142	0.879910213	0.987445678	0.012554322	0.943509615	0.90437788	0.923529412
269	1	0	1	1	1	0.785571142	0.214428858	1	0.785571142	0.879910213	0.987445678	0.012554322	0.943509615	0.90437788	0.923529412
269	1	0	1	1	1	0.785571142	0.214428858	1	0.785571142	0.879910213	0.987445678	0.012554322	0.943509615	0.90437788	0.923529412
269	1	0	1	1	1	0.785571142	0.214428858	1	0.785571142	0.879910213	0.987445678	0.012554322	0.943509615	0.90437788	0.923529412
269	1	0	1	1	1	0.785571142	0.214428858	1	0.785571142	0.879910213	0.987445678	0.012554322	0.943509615	0.90437788	0.923529412
269	1	0	1	1	1	0.785571142	0.214428858	1	0.785571142	0.879910213	0.987445678	0.012554322	0.943509615	0.90437788	0.923529412
269	1	0	1	1	1	0.785571142	0.214428858	1	0.785571142	0.879910213	0.987445678	0.012554322	0.943509615	0.90437788	0.923529412
269	1	0	1	1	1	0.785571142	0.214428858	1	0.785571142	0.879910213	0.987445678	0.012554322	0.943509615	0.90437788	0.923529412
269	1	0	1	1	1	0.785571142	0.214428858	1	0.785571142	0.879910213	0.987445678	0.012554322	0.943509615	0.90437788	0.923529412
269	1	0	1	1	1	0.785571142	0.214428858	1	0.785571142	0.879910213	0.987445678	0.012554322	0.943509615	0.90437788	0.923529412
269	1	0	1	1	1	0.785571142	0.214428858	1	0.785571142	0.879910213	0.987445678	0.012554322	0.943509615	0.90437788	0.923529412
269	1	0	1	1	1	0.785571142	0.214428858	1	0.785571142	0.879910213	0.987445678	0.012554322	0.943509615	0.90437788	0.923529412
269	1	0	1	1	1	0.785571142	0.214428858	1	0.785571142	0.879910213	0.987445678	0.012554322	0.943509615	0.90437788	0.923529412
269	1	0	1	1	1	0.785571142	0.214428858	1	0.785571142	0.879910213	0.987445678	0.012554322	0.943509615	0.90437788	0.923529412
269	1	0	1	1	1	0.785571142	0.214428858	1	0.785571142	0.879910213	0.987445678	0.012554322	0.943509615	0.90437788	0.923529412
269	1	0	1	1	1	0.785571142	0.214428858	1	0.785571142	0.879910213	0.987445678	0.012554322	0.943509615	0.90437788	0.923529412
269	1	0	1	1	1	0.785571142	0.214428858	1	0.785571142	0.879910213	0.987445678	0.012554322	0.943509615	0.90437788	0.923529412
269	1	0	1	1	1	0.785571142	0.214428858	1	0.785571142	0.879910213	0.987445678	0.012554322	0.943509615	0.90437788	0.923529412
269	1	0	1	1	1	0.785571142	0.214428858	1	0.785571142	0.879910213	0.987445678	0.012554322	0.943509615	0.90437788	0.923529412
269	1	0	1	1	1	0.785571142	0.214428858	1	0.785571142	0.879910213	0.987445678	0.012554322	0.943509615	0.90437788	0.923529412
269	1	0	1	1	1	0.785571142	0.214428858	1	0.785571142	0.879910213	0.987445678	0.012554322	0.943509615	0.90437788	0.923529412
269	1	0	1	1	1	0.785571142	0.214428858	1	0.785571142	0.879910213	0.987445678	0.012554322	0.943509615	0.90437788	0.923529412
269	1	0	1	1	1	0.785571142	0.214428858	1	0.785571142	0.879910213	0.987445678	0.012554322	0.943509615	0.90437788	0.923529412
269	1	0	1	1	1	0.785571142	0.214428858	1	0.785571142	0.879910213	0.987445678	0.012554322	0.943509615	0.90437788	0.923529412
269	1	0	1	1	1	0.785571142	0.214428858	1	0.785571142	0.879910213	0.987445678	0.012554322	0.943509615	0.90437788	0.923529412
269	1	0	1	1	1	0.785571142	0.214428858	1	0.785571142	0.879910213	0.987445678	0.012554322	0.943509615	0.90437788	0.923529412
269	1	0	1	1	1	0.785571142	0.214428858	1	0.785571142	0.879910213	0.987445678	0.012554322	0.943509615	0.90437788	0.923529412
269	1	0	1	1	1	0.785571142	0.214428858	1	0.785571142	0.879910213	0.987445678	0.012554322	0.943509615	0.90437788	0.923529412
269	1	0	1	1	1	0.785571142	0.214428858	1	0.785571142	0.879910213	0.987445678	0.012554322	0.943509615	0.90437788	0.923529412
269	1	0	1	1	1	0.785571142	0.214428858	1	0.785571142	0.879910213	0.987445678	0.012554322	0.943509615	0.90437788	0.923529412
269	1	0	1	1	1	0.785571142	0.214428858	1	0.785571142	0.879910213	0.987445678	0.012554322	0.943509615	0.90437788	0.923529412
269	1	0	1	1	1	0.785571142	0.214428858	1	0.785571142	0.879910213	0.987445678	0.012554322	0.943509615	0.90437788	0.923529412
269	1	0	1	1	1	0.785571142	0.214428858	1	0.785571142	0.879910213	0.987445678	0.012554322	0.943509615	0.90437788	0.923529412
269	1	0	1	1	1	0.785571142	0.214428858	1	0.785571142	0.879910213	0.987445678	0.012554322	0.943509615	0.90437788	0.923529412
269	1	0	1	1	1	0.785571142	0.214428858	1	0.785571142	0.879910213	0.987445678	0.012554322	0.943509615	0.90437788	0.923529412
269	1	0	1	1	1	0.785571142	0.214428858	1	0.785571142	0.879910213	0.987445678	0.012554322	0.943509615	0.90437788	0.923529412
269	1	0	1	1	1	0.785571142	0.214428858	1	0.785571142	0.879910213	0.987445678	0.012554322	0.943509615	0.90437788	0.923529412
269	1	0	1	1	1	0.785571142	0.214428858	1	0.785571142	0.879910213	0.987445678	0.012554322	0.943509615	0.90437788	0.923529412
269	1	0	1	1	1	0.785571142	0.214428858	1	0.785571142	0.879910213	0.987445678	0.012554322	0.943509615	0.90437788	0.923529412
269	1	0	1	1	1	0.785571142	0.214428858	1	0.785571142	0.879910213	0.987445678	0.012554322	0.943509615	0.90437788	0.923529412
269	1	0	1	1	1	0.785571142	0.214428858	1	0.785571142	0.879910213	0.987445678	0.012554322	0.943509615	0.90437788	0.923529412
269	1	0	1	1	1	0.785571142	0.214428858	1	0.785571142	0.879910213	0.987445678	0.012554322	0.943509615	0.90437788	0.923529412
269	1	0	1	1	1	0.785571142	0.214428858	1	0.785571142	0.879910213	0.987445678	0.012554322	0.943509615	0.90437788	0.923529412
269	1	0	1	1	1	0.785571142	0.214428858	1	0.785571142	0.879910213	0.987445678	0.012554322	0.943509615	0.90437788	0.923529412
269	1	0	1	1	1	0.785571142	0.214428858	1	0.785571142	0.879910213	0.987445678	0.012554322	0.943509615	0.90437788	0.923529412
269	1	0	1	1	1	0.785571142	0.214428858	1	0.785571142	0.879910213	0.987445678	0.012554322	0.943509615	0.90437788	0.923529412
269	1	0	1	1	1	0.785571142	0.214428858	1	0.785571142	0.879910213	0.987445678	0.012554322	0.943509615	0.90437788	0.923529412
269	1	0	1	1	1	0.785571142	0.214428858	1	0.785571142	0.879910213	0.987445678	0.012554322	0.943509615	0.90437788	0.923529412
269	1	0	1	1	1	0.785571142	0.214428858	1	0.785571142	0.879910213	0.987445678	0.012554322	0.943509615	0.90437788	0.923529412
269	1	0	1	1	1	0.785571142	0.214428858	1	0.785571142	0.879910213	0.987445678	0.012554322	0.943509615	0.90437788	0.923529412
269	1	0	1	1	1	0.785571142	0.214428858	1	0.785571142	0.879910213	0.987445678	0.012554322	0.943509615	0.90437788	0.923529412
269	1	0	1	1	1	0.785571142	0.214428858	1	0.785571142	0.879910213	0.987445678	0.012554322	0.943509615	0.90437788	0.923529412
269	1	0	1	1	1	0.785571142	0.214428858	1	0.785571142	0.879910213	0.987445678	0.012554322	0.943509615	0.90437788	0.923529412
269	1	0	1	1	1	0.785571142	0.214428858	1	0.785571142	0.879910213	0.987445678	0.012554322	0.943509615	0.90437788	0.923529412
269	1	0	1	1	1	0.785571142	0.214428858	1	0.785571142	0.879910213	0.987445678	0.012554322	0.943509615	0.90437788	0.923529412
269	1	0	1	1	1	0.785571142	0.214428858	1	0.785571142	0.879910213	0.987445678	0.012554322	0.943509615	0.90437788	0.923529412
269	1	0	1	1	1	0.785571142	0.214428858	1	0.785571142	0.879910213	0.987445678	0.012554322	0.943509615	0.90437788	0.923529412
269	1	0	1	1	1	0.785571142	0.214428858	1	0.785571142	0.879910213	0.987445678	0.012554322	0.943509615	0.90437788	0.923529412
269	1	0	1	1	1	0.785571142	0.214428858	1	0.785571142	0.879910213	0.987445678	0.012554322	0.943509615	0.90437788	0.923529412
269	1	0	1	1	1	0.785571142	0.214428858	1	0.785571142	0.879910213	0.987445678	0.012554322	0.943509615	0.90437788	0.923529412
269	1	0	1	1	1	0.785571142	0.214428858	1	0.785571142	0.879910213	0.987445678	0.012554322	0.943509615	0.90437788	0.923529412
269	1	0	1	1	1	0.785571142	0.214428858	1	0.785571142	0.879910213	0.987445678	0.012554322	0.943509615	0.90437788	0.923529412
269	1	0	1	1	1	0.785571142	0.214428858	1	0.785571142	0.879910213	0.987445678	0.012554322	0.943509615	0.90437788	0.923529412
269	1	0	1	1	1	0.785571142	0.214428858	1	0.785571142	0.879910213	0.987445678	0.012554322	0.943509615	0.90437788	0.923529412
269	1	0	1	1	1	0.785571142	0.214428858	1	0.785571142	0.879910213	0.987445678	0.012554322	0.943509615	0.90437788	0.923529412
269	1	0	1	1	1	0.785571142	0.214428858	1	0.785571142	0.879910213	0.987445678	0.012554322	0.943509615	0.90437788	0.923529412
269	1	0	1	1	1	0.785571142	0.214428858	1	0.785571142	0.879910213	0.987445678	0.012554322	0.943509615	0.90437788	0.923529412
269	1	0	1	1	1	0.785571142	0.214428858	1	0.785571142	0.879910213	0.987445678	0.012554322	0.943509615	0.90437788	0.923529412
269	1	0	1	1	1	0.785571142	0.214428858	1	0.785571142	0.879910213	0.987445678	0.012554322	0.943509615	0.90437788	0.923529412
269	1	0	1	1	1	0.785571142	0.214428858	1	0.785571142	0.879910213	0.987445678	0.012554322	0.943509615	0.90437788	0.923529412
269	1	0	1	1	1	0.785571142	0.214428858	1	0.785571142	0.879910213	0.987445678	0.012554322	0.943509615	0.90437788	0.923529412
269	1	0	1	1	1	0.785571142	0.214428858	1	0.785571142	0.879910213	0.987445678	0.012554322	0.943509615	0.90437788	0.923529412
269	1	0	1	1	1	0.785571142	0.214428858	1	0.785571142	0.879910213	0.987445678	0.012554322	0.943509615	0.90437788	0.923529412
269	1	0	1	1	1	0.785571142	0.214428858	1	0.785571142	0.879910213	0.987445678	0.012554322	0.943509615	0.90437788	0.923529412
269	1	0	1	1	1	0.785571142	0.214428858	1	0.785571142	0.879910213	0.987445678	0.012554322	0.943509615	0.90437788	0.923529412
269	1	0	1	1	1	0.785571142	0.214428858	1	0.785571142	0.879910213	0.987445678	0.012554322	0.943509615	0.90437788	0.923529412
269	1	0	1	1	1	0.785571142	0.214428858	1	0.785571142	0.879910213	0.987445678	0.012554322	0.943509615	0.90437788	0.923529412
269	1	0	1	1	1	0.785571142	0.214428858	1	0.785571142	0.879910213	0.987445678	0.012554322	0.943509615	0.90437788	0.923529412
269	1	0	1	1	1	0.785571142	0.214428858	1	0.785571142	0.879910213	0.987445678	0.012554322	0.943509615	0.90437788	0.923529412
269	1	0	1	1	1	0.785571142	0.214428858	1	0.785571142	0.879910213	0.987445678	0.012554322	0.943509615	0.90437788	0.923529412
269	1	0	1	1	1	0.785571142	0.214428858	1	0.785571142	0.879910213	0.987445678	0.012554322	0.943509615	0.90437788	0.923529412
269	1	0	1	1	1	0.785571142	0.214428858	1	0.785571142	0.879910213	0.987445678	0.012554322	0.943509615	0.90437788	0.923529412
269	1	0	1	1	1	0.785571142	0.214428858	1	0.785571142	0.879910213	0.987445678	0.012554322	0.943509615	0.90437788	0.923529412
269	1	0	1	1	1	0.785571142	0.214428858	1	0.785571142	0.879910213	0.987445678	0.012554322	0.943509615	0.90437788	0.923529412
269	1	0	1	1	1	0.785571142	0.214428858	1	0.785571142	0.879910213	0.987445678	0.012554322	0.943509615	0.90437788	0.923529412
269	1	0	1	1	1	0.785571142	0.214428858	1	0.785571142	0.879910213	0.987445678	0.012554322	0.943509615	0.90437788	0.923529412
269	1	0	1	1	1	0.785571142	0.214428858	1	0.785571142	0.879910213	0.987445678	0.012554322	0.943509615	0.90437788	0.923529412
269	1	0	1	1	1	0.785571142	0.214428858	1	0.785571142	0.879910213	0.987445678	0.012554322	0.943509615	0.90437788	0.923529412
269	1	0	1	1	1	0.785571142	0.214428858	1	0.785571142	0.879910213	0.987445678	0.012554322	0.943509615	0.90437788	0.923529412
269	1	0	1	1	1	0.785571142	0.214428858	1	0.785571142	0.879910213	0.987445678	0.012554322	0.943509615	0.90437788	0.923529412
269	1	0	1	1	1	0.785571142	0.214428858	1	0.785571142	0.879910213	0.987445678	0.012554322	0.943509615	0.90437788	0.923529412
269	1	0	1	1	1	0.785571142	0.214428858	1	0.785571142	0.879910213	0.987445678	0.012554322	0.943509615	0.90437788	0.923529412
269	1	0	1	1	1	0.785571142	0.214428858	1	0.785571142	0.879910213	0.987445678	0.012554322	0.943509615	0.90437788	0.923529412
269	1	0	1	1	1	0.785571142	0.214428858	1	0.785571142	0.879910213	0.987445678	0.012554322	0.943509615	0.90437788	0.923529412
269	1	0	1	1	1	0.785571142	0.214428858	1	0.785571142	0.879910213	0.987445678	0.012554322	0.943509615	0.90437788	0.923529412
269	1	0	1	1	1	0.785571142	0.214428858	1	0.785571142	0.879910213	0.987445678	0.012554322	0.943509615	0.90437788	0.923529412
269	1	0	1	1	1	0.785571142	0.214428858	1	0.785571142	0.879910213	0.987445678	0.012554322	0.943509615	0.90437788	0.923529412
269	1	0	1	1	1	0.785571142	0.214428858	1	0.785571142	0.879910213	0.987445678	0.012554322	0.943509615	0.90437788	0.923529412
269	1	0	1	1	1	0.785571142	0.214428858	1	0.785571142	0.879910213	0.987445678	0.012554322	0.943509615	0.90437788	0.923529412
269	1	0	1	1	1	0.785571142	0.214428858	1	0.785571142	0.879910213	0.987445678	0.012554322	0.943509615	0.90437788	0.923529412
269	1	0	1	1	1	0.785571142	0.214428858	1	0.785571142	0.879910213	0.987445678	0.012554322	0.943509615	0.90437788	0.923529412
269	1	0	1	1	1	0.785571142	0.214428858	1	0.785571142	0.879910213	0.987445678	0.012554322	0.943509615	0.90437788	0.923529412
269	1	0	1	1	1	0.785571142	0.214428858	1	0.785571142	0.879910213	0.987445678	0.012554322	0.943509615	0.90437788	0.923529412
269	1	0	1	1	1	0.785571142	0.214428858	1	0.785571142	0.879910213	0.987445678	0.012554322	0.943509615	0.90437788	0.923529412
269	1	0	1	1	1	0.785571142	0.214428858	1	0.785571142	0.879910213	0.987445678	0.012554322	0.943509615	0.90437788	0.923529412
269	1	0	1	1	1	0.785571142	0.214428858	1	0.785571142	0.879910213	0.987445678	0.012554322	0.943509615	0.90437788	0.923529412
269	1	0	1	1	1	0.785571142	0.214428858	1	0.785571142	0.879910213	0.987445678	0.012554322	0.943509615	0.90437788	0.923529412
269	1	0	1	1	1	0.785571142	0.214428858	1	0.785571142	0.879910213	0.987445678	0.012554322	0.943509615	0.90437788	0.923529412
269	1	0	1	1	1	0.785571142	0.214428858	1	0.785571142	0.879910213	0.987445678	0.012554322	0.943509615	0.90437788	0.923529412
269	1	0	1	1	1	0.785571142	0.214428858	1	0.785571142	0.879910213	0.987445678	0.012554322	0.943509615	0.90437788	0.923529412
269	1	0	1	1	1	0.785571142	0.214428858	1	0.785571142	0.879910213	0.987445678	0.012554322	0.943509615	0.90437788	0.923529412
269	1	0	1	1	1	0.785571142	0.214428858	1	0.785571142	0.879910213	0.987445678	0.012554322	0.943509615	0.90437788	0.923529412
269	1	0	1	1	1	0.785571142	0.214428858	1	0.785571142	0.879910213	0.987445678	0.012554322	0.943509615	0.90437788	0.923529412
269	1	0	1	1	1	0.785571142	0.214428858	1	0.785571142	0.879910213	0.987445678	0.012554322	0.943509615	0.90437788	0.923529412
269	1	0	1	1	1	0.785571142	0.214428858	1	0.785571142	0.879910213	0.987445678	0.012554322	0.943509615	0.90437788	0.923529412
269	1	0	1	1	1	0.785571142	0.214428858	1	0.785571142	0.879910213	0.987445678	0.012554322	0.943509615	0.90437788	0.923529412
269	1	0	1	1	1	0.785571142	0.214428858	1	0.785571142	0.879910213	0.987445678	0.012554322	0.943509615	0.90437788	0.923529412
269	1	0	1	1	1	0.785571142	0.214428858	1	0.785571142	0.879910213	0.987445678	0.012554322	0.943509615	0.90437788	0.923529412
269	1	0	1	1	1	0.785571142	0.214428858	1	0.785571142	0.879910213	0.987445678	0.012554322	0.943509615	0.90437788	0.923529412
269	1	0	1	1	1	0.785571142	0.214428858	1	0.785571142	0.879910213	0.987445678	0.012554322	0.943509615	0.90437788	0.923529412
269	1	0	1	1	1	0.785571142	0.214428858	1	0.785571142	0.879910213	0.987445678	0.012554322	0.943509615	0.90437788	0.923529412
269	1	0	1	1	1	0.785571142	0.214428858	1	0.785571142	0.879910213	0.987445678	0.012554322	0.943509615	0.90437788	0.923529412
269	1	0	1	1	1	0.785571142	0.214428858	1	0.785571142	0.879910213	0.987445678	0.012554322	0.943509615	0.90437788	0.923529412
269	1	0	1	1	1	0.785571142	0.214428858	1	0.785571142	0.879910213	0.987445678	0.012554322	0.943509615	0.90437788	0.923529412
269	1	0	1	1	1	0.785571142	0.214428858	1	0.785571142	0.879910213	0.987445678	0.012554322	0.943509615	0.90437788	0.923529412
269	1	0	1	1	1	0.785571142	0.214428858	1	0.785571142	0.879910213	0.987445678	0.012554322	0.943509615	0.90437788	0.923529412
269	1	0	1	1	1	0.785571142	0.214428858	1	0.785571142	0.879910213	0.987445678	0.012554322	0.943509615	0.90437788	0.923529412
269	1	0	1	1	1	0.785571142	0.214428858	1	0.785571142	0.879910213	0.987445678	0.012554322	0.943509615	0.90437788	0.923529412
269	1	0	1	1	1	0.785571142	0.214428858	1	0.785571142	0.879910213	0.987445678	0.012554322	0.943509615	0.90437788	0.923529412
269	1	0	1	1	1	0.785571142	0.214428858	1	0.785571142	0.879910213	0.987445678	0.012554322	0.943509615	0.90437788	0.923529412
269	1	0	1	1	1	0.785571142	0.214428858	1	0.785571142	0.879910213	0.987445678	0.012554322	0.943509615	0.90437788	0.923529412
269	1	0	1	1	1	0.785571142	0.214428858	1	0.785571142	0.879910213	0.987445678	0.012554322	0.943509615	0.90437788	0.923529412
269	1	0	1	1	1	0.785571142	0.214428858	1	0.785571142	0.879910213	0.987445678	0.012554322	0.943509615	0.90437788	0.923529412
269	1	0	1	1	1	0.785571142	0.214428858	1	0.785571142	0.879910213	0.987445678	0.012554322	0.943509615	0.90437788	0.923529412
269	1	0	1	1	1	0.785571142	0.214428858	1	0.785571142	0.879910213	0.987445678	0.012554322	0.943509615	0.90437788	0.923529412
269	1	0	1	1	1	0.785571142	0.214428858	1	0.785571142	0.879910213	0.987445678	0.012554322	0.943509615	0.90437788	0.923529412
269	1	0	1	1	1	0.785571142	0.214428858	1	0.785571142	0.879910213	0.987445678	0.012554322	0.943509615	0.90437788	0.923529412
269	1	0	1	1	1	0.785571142	0.214428858	1	0.785571142	0.879910213	0.987445678	0.012554322	0.943509615	0.90437788	0.923529412
269	1	0	1	1	1	0.785571142	0.214428858	1	0.785571142	0.879910213	0.987445678	0.012554322	0.943509615	0.90437788	0.923529412
269	1	0	1	1	1	0.785571142	0.214428858	1	0.785571142	0.879910213	0.987445678	0.012554322	0.943509615	0.90437788	0.923529412
269	1	0	1	1	1	0.785571142	0.214428858	1	0.785571142	0.879910213	0.987445678	0.012554322	0.943509615	0.90437788	0.923529412
269	1	0	1	1	1	0.785571142	0.214428858	1	0.785571142	0.879910213	0.987445678	0.012554322	0.943509615	0.90437788	0.923529412
269	1	0	1	1	1	0.785571142	0.214428858	1	0.785571142	0.879910213	0.987445678	0.012554322	0.943509615	0.90437788	0.923529412
269	1	0	1	1	1	0.785571142	0.214428858	1	0.785571142	0.879910213	0.987445678	0.012554322	0.943509615	0.90437788	0.923529412
269	1	0	1	1	1	0.785571142	0.214428858	1	0.785571142	0.879910213	0.987445678	0.012554322	0.943509615	0.90437788	0.923529412
269	1	0	1	1	1	0.785571142	0.214428858	1	0.785571142	0.879910213	0.987445678	0.012554322	0.943509615	0.90437788	0.923529412
269	1	0	1	1	1	0.785571142	0.214428858	1	0.785571142	0.879910213	0.987445678	0.012554322	0.943509615	0.90437788	0.923529412
269	1	0	1	1	1	0.785571142	0.214428858	1	0.785571142	0.879910213	0.987445678	0.012554322	0.943509615	0.90437788	0.923529412
269	1	0	1	1	1	0.785571142	0.214428858	1	0.785571142	0.879910213	0.987445678	0.012554322	0.943509615	0.90437788	0.923529412
269	1	0	1	1	1	0.785571142	0.214428858	1	0.785571142	0.879910213	0.987445678	0.012554322	0.943509615	0.90437788	0.923529412
269	1	0	1	1	1	0.785571142	0.214428858	1	0.785571142	0.879910213	0.987445678	0.012554322	0.943509615	0.90437788	0.923529412
269	1	0	1	1	1	0.785571142	0.214428858	1	0.785571142	0.879910213	0.987445678	0.012554322	0.943509615	0.90437788	0.923529412
269	1	0	1	1	1	0.785571142	0.214428858	1	0.785571142	0.879910213	0.987445678	0.012554322	0.943509615	0.90437788	0.923529412
269	1	0	1	1	1	0.785571142	0.214428858	1	0.785571142	0.879910213	0.987445678	0.012554322	0.943509615	0.90437788	0.923529412
269	1	0	1	1	1	0.785571142	0.214428858	1	0.785571142	0.879910213	0.987445678	0.012554322	0.943509615	0.90437788	0.923529412
269	1	0	1	1	1	0.785571142	0.214428858	1	0.785571142	0.879910213	0.987445678	0.012554322	0.943509615	0.90437788	0.923529412
269	1	0	1	1	1	0.785571142	0.214428858	1	0.785571142	0.879910213	0.987445678	0.012554322	0.943509615	0.90437788	0.923529412
269	1	0	1	1	1	0.785571142	0.214428858	1	0.785571142	0.879910213	0.987445678	0.012554322	0.943509615	0.90437788	0.923529412
269	1	0	1	1	1	0.785571142	0.214428858	1	0.785571142	0.879910213	0.987445678	0.012554322	0.943509615	0.90437788	0.923529412
269	1	0	1	1	1	0.785571142	0.214428858	1	0.785571142	0.879910213	0.987445678	0.012554322	0.943509615	0.90437788	0.923529412
269	1	0	1	1	1	0.785571142	0.214428858	1	0.785571142	0.879910213	0.987445678	0.012554322	0.943509615	0.90437788	0.923529412
269	1	0	1	1	1	0.785571142	0.214428858	1	0.785571142	0.879910213	0.987445678	0.012554322	0.943509615	0.90437788	0.923529412
