# Supplementary material for: An Improved Hybrid Feature Selection Algorithm for Electric Charge Recovery Risk
Source: Hindawi journal article supplement (doi:10.1155/2020/8479341), 2020-08-28
Supplement: f1 [file 8479341.f1.zip › 8479341.f1/Experimental Results/201807/NBPSOSEE_results.csv]

features_num	Accuracy_high	Loss_high	Precission_high	Recall_high	F1_high	Accuracy_med	Loss_med	Precission_med	Recall_med	F1_med	Accuracy_low	Loss_low	Precission_low	Recall_low	F1_low
221	1.0	0.0	1.0	1.0	1.0	0.7188081936685289	0.2811918063314711	0.9569620253164556	0.73828125	0.8335170893054024	0.9347615354788678	0.06523846452113223	0.5772843723313408	0.7915690866510539	0.6676543209876543
256	1.0	0.0	1.0	1.0	1.0	0.8788265306122449	0.12117346938775507	0.9985380116959064	0.879021879021879	0.9349760438056124	0.9539852911945936	0.04601470880540648	0.5589692765113974	0.9690721649484536	0.7089880578252671
256	1.0	0.0	1.0	1.0	1.0	0.8788265306122449	0.12117346938775507	0.9985380116959064	0.879021879021879	0.9349760438056124	0.9539852911945936	0.04601470880540648	0.5589692765113974	0.9690721649484536	0.7089880578252671
256	1.0	0.0	1.0	1.0	1.0	0.8788265306122449	0.12117346938775507	0.9985380116959064	0.879021879021879	0.9349760438056124	0.9539852911945936	0.04601470880540648	0.5589692765113974	0.9690721649484536	0.7089880578252671
256	1.0	0.0	1.0	1.0	1.0	0.8788265306122449	0.12117346938775507	0.9985380116959064	0.879021879021879	0.9349760438056124	0.9539852911945936	0.04601470880540648	0.5589692765113974	0.9690721649484536	0.7089880578252671
256	1.0	0.0	1.0	1.0	1.0	0.8788265306122449	0.12117346938775507	0.9985380116959064	0.879021879021879	0.9349760438056124	0.9539852911945936	0.04601470880540648	0.5589692765113974	0.9690721649484536	0.7089880578252671
236	1.0	0.0	1.0	1.0	1.0	0.8542274052478134	0.14577259475218662	0.9948892674616696	0.8575624082232012	0.9211356466876972	0.9623719464144996	0.03762805358550037	0.6551724137931034	0.9074626865671642	0.7609511889862327
202	1.0	0.0	1.0	1.0	1.0	0.8154362416107382	0.18456375838926176	1.0	0.8151260504201681	0.8981481481481481	0.9802984492343704	0.01970155076562952	0.8802153432032301	0.8526727509778357	0.8662251655629138
202	1.0	0.0	1.0	1.0	1.0	0.8154362416107382	0.18456375838926176	1.0	0.8151260504201681	0.8981481481481481	0.9802984492343704	0.01970155076562952	0.8802153432032301	0.8526727509778357	0.8662251655629138
202	1.0	0.0	1.0	1.0	1.0	0.8154362416107382	0.18456375838926176	1.0	0.8151260504201681	0.8981481481481481	0.9802984492343704	0.01970155076562952	0.8802153432032301	0.8526727509778357	0.8662251655629138
202	1.0	0.0	1.0	1.0	1.0	0.8154362416107382	0.18456375838926176	1.0	0.8151260504201681	0.8981481481481481	0.9802984492343704	0.01970155076562952	0.8802153432032301	0.8526727509778357	0.8662251655629138
202	1.0	0.0	1.0	1.0	1.0	0.8154362416107382	0.18456375838926176	1.0	0.8151260504201681	0.8981481481481481	0.9802984492343704	0.01970155076562952	0.8802153432032301	0.8526727509778357	0.8662251655629138
202	1.0	0.0	1.0	1.0	1.0	0.8154362416107382	0.18456375838926176	1.0	0.8151260504201681	0.8981481481481481	0.9802984492343704	0.01970155076562952	0.8802153432032301	0.8526727509778357	0.8662251655629138
202	1.0	0.0	1.0	1.0	1.0	0.8154362416107382	0.18456375838926176	1.0	0.8151260504201681	0.8981481481481481	0.9802984492343704	0.01970155076562952	0.8802153432032301	0.8526727509778357	0.8662251655629138
202	1.0	0.0	1.0	1.0	1.0	0.8154362416107382	0.18456375838926176	1.0	0.8151260504201681	0.8981481481481481	0.9802984492343704	0.01970155076562952	0.8802153432032301	0.8526727509778357	0.8662251655629138
202	1.0	0.0	1.0	1.0	1.0	0.8154362416107382	0.18456375838926176	1.0	0.8151260504201681	0.8981481481481481	0.9802984492343704	0.01970155076562952	0.8802153432032301	0.8526727509778357	0.8662251655629138
202	1.0	0.0	1.0	1.0	1.0	0.8154362416107382	0.18456375838926176	1.0	0.8151260504201681	0.8981481481481481	0.9802984492343704	0.01970155076562952	0.8802153432032301	0.8526727509778357	0.8662251655629138
202	1.0	0.0	1.0	1.0	1.0	0.8154362416107382	0.18456375838926176	1.0	0.8151260504201681	0.8981481481481481	0.9802984492343704	0.01970155076562952	0.8802153432032301	0.8526727509778357	0.8662251655629138
202	1.0	0.0	1.0	1.0	1.0	0.8154362416107382	0.18456375838926176	1.0	0.8151260504201681	0.8981481481481481	0.9802984492343704	0.01970155076562952	0.8802153432032301	0.8526727509778357	0.8662251655629138
202	1.0	0.0	1.0	1.0	1.0	0.8154362416107382	0.18456375838926176	1.0	0.8151260504201681	0.8981481481481481	0.9802984492343704	0.01970155076562952	0.8802153432032301	0.8526727509778357	0.8662251655629138
202	1.0	0.0	1.0	1.0	1.0	0.8154362416107382	0.18456375838926176	1.0	0.8151260504201681	0.8981481481481481	0.9802984492343704	0.01970155076562952	0.8802153432032301	0.8526727509778357	0.8662251655629138
202	1.0	0.0	1.0	1.0	1.0	0.8154362416107382	0.18456375838926176	1.0	0.8151260504201681	0.8981481481481481	0.9802984492343704	0.01970155076562952	0.8802153432032301	0.8526727509778357	0.8662251655629138
202	1.0	0.0	1.0	1.0	1.0	0.8154362416107382	0.18456375838926176	1.0	0.8151260504201681	0.8981481481481481	0.9802984492343704	0.01970155076562952	0.8802153432032301	0.8526727509778357	0.8662251655629138
202	1.0	0.0	1.0	1.0	1.0	0.8154362416107382	0.18456375838926176	1.0	0.8151260504201681	0.8981481481481481	0.9802984492343704	0.01970155076562952	0.8802153432032301	0.8526727509778357	0.8662251655629138
202	1.0	0.0	1.0	1.0	1.0	0.8154362416107382	0.18456375838926176	1.0	0.8151260504201681	0.8981481481481481	0.9802984492343704	0.01970155076562952	0.8802153432032301	0.8526727509778357	0.8662251655629138
202	1.0	0.0	1.0	1.0	1.0	0.8154362416107382	0.18456375838926176	1.0	0.8151260504201681	0.8981481481481481	0.9802984492343704	0.01970155076562952	0.8802153432032301	0.8526727509778357	0.8662251655629138
202	1.0	0.0	1.0	1.0	1.0	0.8154362416107382	0.18456375838926176	1.0	0.8151260504201681	0.8981481481481481	0.9802984492343704	0.01970155076562952	0.8802153432032301	0.8526727509778357	0.8662251655629138
202	1.0	0.0	1.0	1.0	1.0	0.8154362416107382	0.18456375838926176	1.0	0.8151260504201681	0.8981481481481481	0.9802984492343704	0.01970155076562952	0.8802153432032301	0.8526727509778357	0.8662251655629138
202	1.0	0.0	1.0	1.0	1.0	0.8154362416107382	0.18456375838926176	1.0	0.8151260504201681	0.8981481481481481	0.9802984492343704	0.01970155076562952	0.8802153432032301	0.8526727509778357	0.8662251655629138
202	1.0	0.0	1.0	1.0	1.0	0.8154362416107382	0.18456375838926176	1.0	0.8151260504201681	0.8981481481481481	0.9802984492343704	0.01970155076562952	0.8802153432032301	0.8526727509778357	0.8662251655629138
202	1.0	0.0	1.0	1.0	1.0	0.8154362416107382	0.18456375838926176	1.0	0.8151260504201681	0.8981481481481481	0.9802984492343704	0.01970155076562952	0.8802153432032301	0.8526727509778357	0.8662251655629138
202	1.0	0.0	1.0	1.0	1.0	0.8154362416107382	0.18456375838926176	1.0	0.8151260504201681	0.8981481481481481	0.9802984492343704	0.01970155076562952	0.8802153432032301	0.8526727509778357	0.8662251655629138
202	1.0	0.0	1.0	1.0	1.0	0.8154362416107382	0.18456375838926176	1.0	0.8151260504201681	0.8981481481481481	0.9802984492343704	0.01970155076562952	0.8802153432032301	0.8526727509778357	0.8662251655629138
202	1.0	0.0	1.0	1.0	1.0	0.8154362416107382	0.18456375838926176	1.0	0.8151260504201681	0.8981481481481481	0.9802984492343704	0.01970155076562952	0.8802153432032301	0.8526727509778357	0.8662251655629138
202	1.0	0.0	1.0	1.0	1.0	0.8154362416107382	0.18456375838926176	1.0	0.8151260504201681	0.8981481481481481	0.9802984492343704	0.01970155076562952	0.8802153432032301	0.8526727509778357	0.8662251655629138
202	1.0	0.0	1.0	1.0	1.0	0.8154362416107382	0.18456375838926176	1.0	0.8151260504201681	0.8981481481481481	0.9802984492343704	0.01970155076562952	0.8802153432032301	0.8526727509778357	0.8662251655629138
202	1.0	0.0	1.0	1.0	1.0	0.8154362416107382	0.18456375838926176	1.0	0.8151260504201681	0.8981481481481481	0.9802984492343704	0.01970155076562952	0.8802153432032301	0.8526727509778357	0.8662251655629138
202	1.0	0.0	1.0	1.0	1.0	0.8154362416107382	0.18456375838926176	1.0	0.8151260504201681	0.8981481481481481	0.9802984492343704	0.01970155076562952	0.8802153432032301	0.8526727509778357	0.8662251655629138
202	1.0	0.0	1.0	1.0	1.0	0.8154362416107382	0.18456375838926176	1.0	0.8151260504201681	0.8981481481481481	0.9802984492343704	0.01970155076562952	0.8802153432032301	0.8526727509778357	0.8662251655629138
202	1.0	0.0	1.0	1.0	1.0	0.8154362416107382	0.18456375838926176	1.0	0.8151260504201681	0.8981481481481481	0.9802984492343704	0.01970155076562952	0.8802153432032301	0.8526727509778357	0.8662251655629138
202	1.0	0.0	1.0	1.0	1.0	0.8154362416107382	0.18456375838926176	1.0	0.8151260504201681	0.8981481481481481	0.9802984492343704	0.01970155076562952	0.8802153432032301	0.8526727509778357	0.8662251655629138
202	1.0	0.0	1.0	1.0	1.0	0.8154362416107382	0.18456375838926176	1.0	0.8151260504201681	0.8981481481481481	0.9802984492343704	0.01970155076562952	0.8802153432032301	0.8526727509778357	0.8662251655629138
202	1.0	0.0	1.0	1.0	1.0	0.8154362416107382	0.18456375838926176	1.0	0.8151260504201681	0.8981481481481481	0.9802984492343704	0.01970155076562952	0.8802153432032301	0.8526727509778357	0.8662251655629138
202	1.0	0.0	1.0	1.0	1.0	0.8154362416107382	0.18456375838926176	1.0	0.8151260504201681	0.8981481481481481	0.9802984492343704	0.01970155076562952	0.8802153432032301	0.8526727509778357	0.8662251655629138
218	1.0	0.0	1.0	1.0	1.0	0.8210922787193974	0.17890772128060262	1.0	0.8207547169811321	0.9015544041450776	0.98023447340374	0.019765526596260075	0.9008894536213468	0.8491017964071856	0.87422934648582
206	1.0	0.0	1.0	1.0	1.0	0.8278829604130808	0.17211703958691915	1.0	0.8275862068965517	0.9056603773584906	0.981989875389408	0.018010124610591927	0.888745148771022	0.8740458015267175	0.8813341885824246
207	1.0	0.0	1.0	1.0	1.0	0.8382608695652174	0.1617391304347826	1.0	0.8382608695652174	0.9120151371807	0.9816112084063048	0.01838879159369522	0.8888888888888888	0.8697850821744627	0.8792332268370607
207	1.0	0.0	1.0	1.0	1.0	0.8382608695652174	0.1617391304347826	1.0	0.8382608695652174	0.9120151371807	0.9816112084063048	0.01838879159369522	0.8888888888888888	0.8697850821744627	0.8792332268370607
199	1.0	0.0	1.0	1.0	1.0	0.84	0.16000000000000006	1.0	0.84	0.9130434782608696	0.981708503599922	0.01829149640007788	0.8890322580645161	0.8710493046776233	0.879948914431673
204	1.0	0.0	1.0	1.0	1.0	0.8427787934186471	0.15722120658135286	1.0	0.8427787934186471	0.9146825396825397	0.9818552299631282	0.01814477003687176	0.9136125654450262	0.8522588522588522	0.8818698673404928
208	1.0	0.0	1.0	1.0	1.0	0.8436363636363636	0.15636363636363634	1.0	0.8436363636363636	0.9151873767258382	0.9820440648354848	0.017955935164515213	0.9124183006535947	0.8553921568627451	0.8829854522454144
209	1.0	0.0	1.0	1.0	1.0	0.8461538461538461	0.15384615384615385	1.0	0.8461538461538461	0.9166666666666666	0.9817599689531388	0.018240031046861338	0.9082687338501292	0.8573170731707317	0.8820577164366373
211	1.0	0.0	1.0	1.0	1.0	0.8495412844036697	0.15045871559633028	1.0	0.8495412844036697	0.9186507936507936	0.98185875048506	0.01814124951493989	0.9085051546391752	0.8587088915956151	0.8829054477144647
211	1.0	0.0	1.0	1.0	1.0	0.8495412844036697	0.15045871559633028	1.0	0.8495412844036697	0.9186507936507936	0.98185875048506	0.01814124951493989	0.9085051546391752	0.8587088915956151	0.8829054477144647
214	1.0	0.0	1.0	1.0	1.0	0.8504504504504504	0.14954954954954958	1.0	0.8504504504504504	0.9191820837390458	0.9820353466692562	0.01796465333074382	0.905440414507772	0.8618988902589396	0.8831332912192041
214	1.0	0.0	1.0	1.0	1.0	0.8504504504504504	0.14954954954954958	1.0	0.8504504504504504	0.9191820837390458	0.9820353466692562	0.01796465333074382	0.905440414507772	0.8618988902589396	0.8831332912192041
214	1.0	0.0	1.0	1.0	1.0	0.8504504504504504	0.14954954954954958	1.0	0.8504504504504504	0.9191820837390458	0.9820353466692562	0.01796465333074382	0.905440414507772	0.8618988902589396	0.8831332912192041
213	1.0	0.0	1.0	1.0	1.0	0.8563432835820896	0.14365671641791045	1.0	0.8563432835820896	0.9226130653266332	0.9823592129495008	0.01764078705049921	0.9196891191709844	0.8554216867469879	0.8863920099875156
213	1.0	0.0	1.0	1.0	1.0	0.8563432835820896	0.14365671641791045	1.0	0.8563432835820896	0.9226130653266332	0.9823592129495008	0.01764078705049921	0.9196891191709844	0.8554216867469879	0.8863920099875156
213	1.0	0.0	1.0	1.0	1.0	0.8563432835820896	0.14365671641791045	1.0	0.8563432835820896	0.9226130653266332	0.9823592129495008	0.01764078705049921	0.9196891191709844	0.8554216867469879	0.8863920099875156
213	1.0	0.0	1.0	1.0	1.0	0.8675373134328358	0.1324626865671642	1.0	0.8675373134328358	0.9290709290709293	0.9824561403508772	0.017543859649122858	0.9102402022756004	0.8674698795180723	0.8883405305367058
213	1.0	0.0	1.0	1.0	1.0	0.8675373134328358	0.1324626865671642	1.0	0.8675373134328358	0.9290709290709293	0.9824561403508772	0.017543859649122858	0.9102402022756004	0.8674698795180723	0.8883405305367058
213	1.0	0.0	1.0	1.0	1.0	0.8675373134328358	0.1324626865671642	1.0	0.8675373134328358	0.9290709290709293	0.9824561403508772	0.017543859649122858	0.9102402022756004	0.8674698795180723	0.8883405305367058
213	1.0	0.0	1.0	1.0	1.0	0.8675373134328358	0.1324626865671642	1.0	0.8675373134328358	0.9290709290709293	0.9824561403508772	0.017543859649122858	0.9102402022756004	0.8674698795180723	0.8883405305367058
213	1.0	0.0	1.0	1.0	1.0	0.8675373134328358	0.1324626865671642	1.0	0.8675373134328358	0.9290709290709293	0.9824561403508772	0.017543859649122858	0.9102402022756004	0.8674698795180723	0.8883405305367058
213	1.0	0.0	1.0	1.0	1.0	0.8675373134328358	0.1324626865671642	1.0	0.8675373134328358	0.9290709290709293	0.9824561403508772	0.017543859649122858	0.9102402022756004	0.8674698795180723	0.8883405305367058
213	1.0	0.0	1.0	1.0	1.0	0.8675373134328358	0.1324626865671642	1.0	0.8675373134328358	0.9290709290709293	0.9824561403508772	0.017543859649122858	0.9102402022756004	0.8674698795180723	0.8883405305367058
213	1.0	0.0	1.0	1.0	1.0	0.8675373134328358	0.1324626865671642	1.0	0.8675373134328358	0.9290709290709293	0.9824561403508772	0.017543859649122858	0.9102402022756004	0.8674698795180723	0.8883405305367058
213	1.0	0.0	1.0	1.0	1.0	0.8675373134328358	0.1324626865671642	1.0	0.8675373134328358	0.9290709290709293	0.9824561403508772	0.017543859649122858	0.9102402022756004	0.8674698795180723	0.8883405305367058
213	1.0	0.0	1.0	1.0	1.0	0.8675373134328358	0.1324626865671642	1.0	0.8675373134328358	0.9290709290709293	0.9824561403508772	0.017543859649122858	0.9102402022756004	0.8674698795180723	0.8883405305367058
213	1.0	0.0	1.0	1.0	1.0	0.8675373134328358	0.1324626865671642	1.0	0.8675373134328358	0.9290709290709293	0.9824561403508772	0.017543859649122858	0.9102402022756004	0.8674698795180723	0.8883405305367058
213	1.0	0.0	1.0	1.0	1.0	0.8675373134328358	0.1324626865671642	1.0	0.8675373134328358	0.9290709290709293	0.9824561403508772	0.017543859649122858	0.9102402022756004	0.8674698795180723	0.8883405305367058
213	1.0	0.0	1.0	1.0	1.0	0.8675373134328358	0.1324626865671642	1.0	0.8675373134328358	0.9290709290709293	0.9824561403508772	0.017543859649122858	0.9102402022756004	0.8674698795180723	0.8883405305367058
213	1.0	0.0	1.0	1.0	1.0	0.8675373134328358	0.1324626865671642	1.0	0.8675373134328358	0.9290709290709293	0.9824561403508772	0.017543859649122858	0.9102402022756004	0.8674698795180723	0.8883405305367058
213	1.0	0.0	1.0	1.0	1.0	0.8675373134328358	0.1324626865671642	1.0	0.8675373134328358	0.9290709290709293	0.9824561403508772	0.017543859649122858	0.9102402022756004	0.8674698795180723	0.8883405305367058
213	1.0	0.0	1.0	1.0	1.0	0.8675373134328358	0.1324626865671642	1.0	0.8675373134328358	0.9290709290709293	0.9824561403508772	0.017543859649122858	0.9102402022756004	0.8674698795180723	0.8883405305367058
213	1.0	0.0	1.0	1.0	1.0	0.8675373134328358	0.1324626865671642	1.0	0.8675373134328358	0.9290709290709293	0.9824561403508772	0.017543859649122858	0.9102402022756004	0.8674698795180723	0.8883405305367058
213	1.0	0.0	1.0	1.0	1.0	0.8675373134328358	0.1324626865671642	1.0	0.8675373134328358	0.9290709290709293	0.9824561403508772	0.017543859649122858	0.9102402022756004	0.8674698795180723	0.8883405305367058
213	1.0	0.0	1.0	1.0	1.0	0.8675373134328358	0.1324626865671642	1.0	0.8675373134328358	0.9290709290709293	0.9824561403508772	0.017543859649122858	0.9102402022756004	0.8674698795180723	0.8883405305367058
213	1.0	0.0	1.0	1.0	1.0	0.8675373134328358	0.1324626865671642	1.0	0.8675373134328358	0.9290709290709293	0.9824561403508772	0.017543859649122858	0.9102402022756004	0.8674698795180723	0.8883405305367058
213	1.0	0.0	1.0	1.0	1.0	0.8675373134328358	0.1324626865671642	1.0	0.8675373134328358	0.9290709290709293	0.9824561403508772	0.017543859649122858	0.9102402022756004	0.8674698795180723	0.8883405305367058
213	1.0	0.0	1.0	1.0	1.0	0.8675373134328358	0.1324626865671642	1.0	0.8675373134328358	0.9290709290709293	0.9824561403508772	0.017543859649122858	0.9102402022756004	0.8674698795180723	0.8883405305367058
213	1.0	0.0	1.0	1.0	1.0	0.8675373134328358	0.1324626865671642	1.0	0.8675373134328358	0.9290709290709293	0.9824561403508772	0.017543859649122858	0.9102402022756004	0.8674698795180723	0.8883405305367058
213	1.0	0.0	1.0	1.0	1.0	0.8675373134328358	0.1324626865671642	1.0	0.8675373134328358	0.9290709290709293	0.9824561403508772	0.017543859649122858	0.9102402022756004	0.8674698795180723	0.8883405305367058
213	1.0	0.0	1.0	1.0	1.0	0.8675373134328358	0.1324626865671642	1.0	0.8675373134328358	0.9290709290709293	0.9824561403508772	0.017543859649122858	0.9102402022756004	0.8674698795180723	0.8883405305367058
213	1.0	0.0	1.0	1.0	1.0	0.8675373134328358	0.1324626865671642	1.0	0.8675373134328358	0.9290709290709293	0.9824561403508772	0.017543859649122858	0.9102402022756004	0.8674698795180723	0.8883405305367058
213	1.0	0.0	1.0	1.0	1.0	0.8675373134328358	0.1324626865671642	1.0	0.8675373134328358	0.9290709290709293	0.9824561403508772	0.017543859649122858	0.9102402022756004	0.8674698795180723	0.8883405305367058
213	1.0	0.0	1.0	1.0	1.0	0.8675373134328358	0.1324626865671642	1.0	0.8675373134328358	0.9290709290709293	0.9824561403508772	0.017543859649122858	0.9102402022756004	0.8674698795180723	0.8883405305367058
213	1.0	0.0	1.0	1.0	1.0	0.8675373134328358	0.1324626865671642	1.0	0.8675373134328358	0.9290709290709293	0.9824561403508772	0.017543859649122858	0.9102402022756004	0.8674698795180723	0.8883405305367058
213	1.0	0.0	1.0	1.0	1.0	0.8675373134328358	0.1324626865671642	1.0	0.8675373134328358	0.9290709290709293	0.9824561403508772	0.017543859649122858	0.9102402022756004	0.8674698795180723	0.8883405305367058
213	1.0	0.0	1.0	1.0	1.0	0.8675373134328358	0.1324626865671642	1.0	0.8675373134328358	0.9290709290709293	0.9824561403508772	0.017543859649122858	0.9102402022756004	0.8674698795180723	0.8883405305367058
213	1.0	0.0	1.0	1.0	1.0	0.8675373134328358	0.1324626865671642	1.0	0.8675373134328358	0.9290709290709293	0.9824561403508772	0.017543859649122858	0.9102402022756004	0.8674698795180723	0.8883405305367058
213	1.0	0.0	1.0	1.0	1.0	0.8675373134328358	0.1324626865671642	1.0	0.8675373134328358	0.9290709290709293	0.9824561403508772	0.017543859649122858	0.9102402022756004	0.8674698795180723	0.8883405305367058
213	1.0	0.0	1.0	1.0	1.0	0.8675373134328358	0.1324626865671642	1.0	0.8675373134328358	0.9290709290709293	0.9824561403508772	0.017543859649122858	0.9102402022756004	0.8674698795180723	0.8883405305367058
213	1.0	0.0	1.0	1.0	1.0	0.8675373134328358	0.1324626865671642	1.0	0.8675373134328358	0.9290709290709293	0.9824561403508772	0.017543859649122858	0.9102402022756004	0.8674698795180723	0.8883405305367058
213	1.0	0.0	1.0	1.0	1.0	0.8675373134328358	0.1324626865671642	1.0	0.8675373134328358	0.9290709290709293	0.9824561403508772	0.017543859649122858	0.9102402022756004	0.8674698795180723	0.8883405305367058
213	1.0	0.0	1.0	1.0	1.0	0.8675373134328358	0.1324626865671642	1.0	0.8675373134328358	0.9290709290709293	0.9824561403508772	0.017543859649122858	0.9102402022756004	0.8674698795180723	0.8883405305367058
213	1.0	0.0	1.0	1.0	1.0	0.8675373134328358	0.1324626865671642	1.0	0.8675373134328358	0.9290709290709293	0.9824561403508772	0.017543859649122858	0.9102402022756004	0.8674698795180723	0.8883405305367058
213	1.0	0.0	1.0	1.0	1.0	0.8675373134328358	0.1324626865671642	1.0	0.8675373134328358	0.9290709290709293	0.9824561403508772	0.017543859649122858	0.9102402022756004	0.8674698795180723	0.8883405305367058
213	1.0	0.0	1.0	1.0	1.0	0.8675373134328358	0.1324626865671642	1.0	0.8675373134328358	0.9290709290709293	0.9824561403508772	0.017543859649122858	0.9102402022756004	0.8674698795180723	0.8883405305367058
