# Supplementary material for: An Improved Hybrid Feature Selection Algorithm for Electric Charge Recovery Risk
Source: Hindawi journal article supplement (doi:10.1155/2020/8479341), 2020-08-28
Supplement: f1 [file 8479341.f1.zip › 8479341.f1/Experimental Results/201807/NBPSOSEE_SBS_results.csv]

features_num	Accuracy_high	Loss_high	Precission_high	Recall_high	F1_high	Accuracy_med	Loss_med	Precission_med	Recall_med	F1_med	Accuracy_low	Loss_low	Precission_low	Recall_low	F1_low
213	1	0	1	1	1	0.862132353	0.137867647	1	0.862132353	0.925962488	0.982054515	0.017945485	0.905732484	0.864963504	0.884878656
213	1	0	1	1	1	0.862132353	0.137867647	1	0.862132353	0.925962488	0.982054515	0.017945485	0.905732484	0.864963504	0.884878656
212	1	0	1	1	1	0.868274583	0.131725417	1	0.868274583	0.929493545	0.982257126	0.017742874	0.908629442	0.865779927	0.886687307
212	1	0	1	1	1	0.868274583	0.131725417	1	0.868274583	0.929493545	0.982257126	0.017742874	0.908629442	0.865779927	0.886687307
212	1	0	1	1	1	0.868274583	0.131725417	1	0.868274583	0.929493545	0.982257126	0.017742874	0.908629442	0.865779927	0.886687307
211	1	0	1	1	1	0.869646182	0.130353818	1	0.869646182	0.930278884	0.982648313	0.017351687	0.912436548	0.867310012	0.889301175
211	1	0	1	1	1	0.869646182	0.130353818	1	0.869646182	0.930278884	0.982648313	0.017351687	0.912436548	0.867310012	0.889301175
211	1	0	1	1	1	0.869646182	0.130353818	1	0.869646182	0.930278884	0.982648313	0.017351687	0.912436548	0.867310012	0.889301175
211	1	0	1	1	1	0.869646182	0.130353818	1	0.869646182	0.930278884	0.982648313	0.017351687	0.912436548	0.867310012	0.889301175
211	1	0	1	1	1	0.869646182	0.130353818	1	0.869646182	0.930278884	0.982648313	0.017351687	0.912436548	0.867310012	0.889301175
211	1	0	1	1	1	0.869646182	0.130353818	1	0.869646182	0.930278884	0.982648313	0.017351687	0.912436548	0.867310012	0.889301175
211	1	0	1	1	1	0.869646182	0.130353818	1	0.869646182	0.930278884	0.982648313	0.017351687	0.912436548	0.867310012	0.889301175
211	1	0	1	1	1	0.869646182	0.130353818	1	0.869646182	0.930278884	0.982648313	0.017351687	0.912436548	0.867310012	0.889301175
211	1	0	1	1	1	0.869646182	0.130353818	1	0.869646182	0.930278884	0.982648313	0.017351687	0.912436548	0.867310012	0.889301175
211	1	0	1	1	1	0.869646182	0.130353818	1	0.869646182	0.930278884	0.982648313	0.017351687	0.912436548	0.867310012	0.889301175
211	1	0	1	1	1	0.869646182	0.130353818	1	0.869646182	0.930278884	0.982648313	0.017351687	0.912436548	0.867310012	0.889301175
211	1	0	1	1	1	0.869646182	0.130353818	1	0.869646182	0.930278884	0.982648313	0.017351687	0.912436548	0.867310012	0.889301175
211	1	0	1	1	1	0.869646182	0.130353818	1	0.869646182	0.930278884	0.982648313	0.017351687	0.912436548	0.867310012	0.889301175
211	1	0	1	1	1	0.869646182	0.130353818	1	0.869646182	0.930278884	0.982648313	0.017351687	0.912436548	0.867310012	0.889301175
211	1	0	1	1	1	0.869646182	0.130353818	1	0.869646182	0.930278884	0.982648313	0.017351687	0.912436548	0.867310012	0.889301175
211	1	0	1	1	1	0.869646182	0.130353818	1	0.869646182	0.930278884	0.982648313	0.017351687	0.912436548	0.867310012	0.889301175
211	1	0	1	1	1	0.869646182	0.130353818	1	0.869646182	0.930278884	0.982648313	0.017351687	0.912436548	0.867310012	0.889301175
211	1	0	1	1	1	0.869646182	0.130353818	1	0.869646182	0.930278884	0.982648313	0.017351687	0.912436548	0.867310012	0.889301175
211	1	0	1	1	1	0.869646182	0.130353818	1	0.869646182	0.930278884	0.982648313	0.017351687	0.912436548	0.867310012	0.889301175
211	1	0	1	1	1	0.869646182	0.130353818	1	0.869646182	0.930278884	0.982648313	0.017351687	0.912436548	0.867310012	0.889301175
210	1	0	1	1	1	0.871028037	0.128971963	1	0.871028037	0.931068931	0.982554759	0.017445241	0.911504425	0.867629362	0.889025894
210	1	0	1	1	1	0.871028037	0.128971963	1	0.871028037	0.931068931	0.982554759	0.017445241	0.911504425	0.867629362	0.889025894
210	1	0	1	1	1	0.871028037	0.128971963	1	0.871028037	0.931068931	0.982554759	0.017445241	0.911504425	0.867629362	0.889025894
210	1	0	1	1	1	0.871028037	0.128971963	1	0.871028037	0.931068931	0.982554759	0.017445241	0.911504425	0.867629362	0.889025894
210	1	0	1	1	1	0.871028037	0.128971963	1	0.871028037	0.931068931	0.982554759	0.017445241	0.911504425	0.867629362	0.889025894
210	1	0	1	1	1	0.871028037	0.128971963	1	0.871028037	0.931068931	0.982554759	0.017445241	0.911504425	0.867629362	0.889025894
210	1	0	1	1	1	0.871028037	0.128971963	1	0.871028037	0.931068931	0.982554759	0.017445241	0.911504425	0.867629362	0.889025894
210	1	0	1	1	1	0.871028037	0.128971963	1	0.871028037	0.931068931	0.982554759	0.017445241	0.911504425	0.867629362	0.889025894
210	1	0	1	1	1	0.871028037	0.128971963	1	0.871028037	0.931068931	0.982554759	0.017445241	0.911504425	0.867629362	0.889025894
209	1	0	1	1	1	0.871028037	0.128971963	1	0.871028037	0.931068931	0.982748595	0.017251405	0.912768647	0.868832732	0.89025894
209	1	0	1	1	1	0.871028037	0.128971963	1	0.871028037	0.931068931	0.982748595	0.017251405	0.912768647	0.868832732	0.89025894
209	1	0	1	1	1	0.871028037	0.128971963	1	0.871028037	0.931068931	0.982748595	0.017251405	0.912768647	0.868832732	0.89025894
209	1	0	1	1	1	0.871028037	0.128971963	1	0.871028037	0.931068931	0.982748595	0.017251405	0.912768647	0.868832732	0.89025894
209	1	0	1	1	1	0.871028037	0.128971963	1	0.871028037	0.931068931	0.982748595	0.017251405	0.912768647	0.868832732	0.89025894
209	1	0	1	1	1	0.871028037	0.128971963	1	0.871028037	0.931068931	0.982748595	0.017251405	0.912768647	0.868832732	0.89025894
209	1	0	1	1	1	0.871028037	0.128971963	1	0.871028037	0.931068931	0.982748595	0.017251405	0.912768647	0.868832732	0.89025894
209	1	0	1	1	1	0.871028037	0.128971963	1	0.871028037	0.931068931	0.982748595	0.017251405	0.912768647	0.868832732	0.89025894
209	1	0	1	1	1	0.871028037	0.128971963	1	0.871028037	0.931068931	0.982748595	0.017251405	0.912768647	0.868832732	0.89025894
209	1	0	1	1	1	0.871028037	0.128971963	1	0.871028037	0.931068931	0.982748595	0.017251405	0.912768647	0.868832732	0.89025894
209	1	0	1	1	1	0.871028037	0.128971963	1	0.871028037	0.931068931	0.982748595	0.017251405	0.912768647	0.868832732	0.89025894
209	1	0	1	1	1	0.871028037	0.128971963	1	0.871028037	0.931068931	0.982748595	0.017251405	0.912768647	0.868832732	0.89025894
209	1	0	1	1	1	0.871028037	0.128971963	1	0.871028037	0.931068931	0.982748595	0.017251405	0.912768647	0.868832732	0.89025894
209	1	0	1	1	1	0.871028037	0.128971963	1	0.871028037	0.931068931	0.982748595	0.017251405	0.912768647	0.868832732	0.89025894
209	1	0	1	1	1	0.871028037	0.128971963	1	0.871028037	0.931068931	0.982748595	0.017251405	0.912768647	0.868832732	0.89025894
209	1	0	1	1	1	0.871028037	0.128971963	1	0.871028037	0.931068931	0.982748595	0.017251405	0.912768647	0.868832732	0.89025894
209	1	0	1	1	1	0.871028037	0.128971963	1	0.871028037	0.931068931	0.982748595	0.017251405	0.912768647	0.868832732	0.89025894
209	1	0	1	1	1	0.871028037	0.128971963	1	0.871028037	0.931068931	0.982748595	0.017251405	0.912768647	0.868832732	0.89025894
209	1	0	1	1	1	0.871028037	0.128971963	1	0.871028037	0.931068931	0.982748595	0.017251405	0.912768647	0.868832732	0.89025894
209	1	0	1	1	1	0.871028037	0.128971963	1	0.871028037	0.931068931	0.982748595	0.017251405	0.912768647	0.868832732	0.89025894
209	1	0	1	1	1	0.871028037	0.128971963	1	0.871028037	0.931068931	0.982748595	0.017251405	0.912768647	0.868832732	0.89025894
209	1	0	1	1	1	0.871028037	0.128971963	1	0.871028037	0.931068931	0.982748595	0.017251405	0.912768647	0.868832732	0.89025894
209	1	0	1	1	1	0.871028037	0.128971963	1	0.871028037	0.931068931	0.982748595	0.017251405	0.912768647	0.868832732	0.89025894
209	1	0	1	1	1	0.871028037	0.128971963	1	0.871028037	0.931068931	0.982748595	0.017251405	0.912768647	0.868832732	0.89025894
209	1	0	1	1	1	0.871028037	0.128971963	1	0.871028037	0.931068931	0.982748595	0.017251405	0.912768647	0.868832732	0.89025894
209	1	0	1	1	1	0.871028037	0.128971963	1	0.871028037	0.931068931	0.982748595	0.017251405	0.912768647	0.868832732	0.89025894
209	1	0	1	1	1	0.871028037	0.128971963	1	0.871028037	0.931068931	0.982748595	0.017251405	0.912768647	0.868832732	0.89025894
209	1	0	1	1	1	0.871028037	0.128971963	1	0.871028037	0.931068931	0.982748595	0.017251405	0.912768647	0.868832732	0.89025894
209	1	0	1	1	1	0.871028037	0.128971963	1	0.871028037	0.931068931	0.982748595	0.017251405	0.912768647	0.868832732	0.89025894
209	1	0	1	1	1	0.871028037	0.128971963	1	0.871028037	0.931068931	0.982748595	0.017251405	0.912768647	0.868832732	0.89025894
209	1	0	1	1	1	0.871028037	0.128971963	1	0.871028037	0.931068931	0.982748595	0.017251405	0.912768647	0.868832732	0.89025894
209	1	0	1	1	1	0.871028037	0.128971963	1	0.871028037	0.931068931	0.982748595	0.017251405	0.912768647	0.868832732	0.89025894
209	1	0	1	1	1	0.871028037	0.128971963	1	0.871028037	0.931068931	0.982748595	0.017251405	0.912768647	0.868832732	0.89025894
209	1	0	1	1	1	0.871028037	0.128971963	1	0.871028037	0.931068931	0.982748595	0.017251405	0.912768647	0.868832732	0.89025894
209	1	0	1	1	1	0.871028037	0.128971963	1	0.871028037	0.931068931	0.982748595	0.017251405	0.912768647	0.868832732	0.89025894
209	1	0	1	1	1	0.871028037	0.128971963	1	0.871028037	0.931068931	0.982748595	0.017251405	0.912768647	0.868832732	0.89025894
209	1	0	1	1	1	0.871028037	0.128971963	1	0.871028037	0.931068931	0.982748595	0.017251405	0.912768647	0.868832732	0.89025894
209	1	0	1	1	1	0.871028037	0.128971963	1	0.871028037	0.931068931	0.982748595	0.017251405	0.912768647	0.868832732	0.89025894
209	1	0	1	1	1	0.871028037	0.128971963	1	0.871028037	0.931068931	0.982748595	0.017251405	0.912768647	0.868832732	0.89025894
209	1	0	1	1	1	0.871028037	0.128971963	1	0.871028037	0.931068931	0.982748595	0.017251405	0.912768647	0.868832732	0.89025894
209	1	0	1	1	1	0.871028037	0.128971963	1	0.871028037	0.931068931	0.982748595	0.017251405	0.912768647	0.868832732	0.89025894
209	1	0	1	1	1	0.871028037	0.128971963	1	0.871028037	0.931068931	0.982748595	0.017251405	0.912768647	0.868832732	0.89025894
209	1	0	1	1	1	0.871028037	0.128971963	1	0.871028037	0.931068931	0.982748595	0.017251405	0.912768647	0.868832732	0.89025894
209	1	0	1	1	1	0.871028037	0.128971963	1	0.871028037	0.931068931	0.982748595	0.017251405	0.912768647	0.868832732	0.89025894
209	1	0	1	1	1	0.871028037	0.128971963	1	0.871028037	0.931068931	0.982748595	0.017251405	0.912768647	0.868832732	0.89025894
209	1	0	1	1	1	0.871028037	0.128971963	1	0.871028037	0.931068931	0.982748595	0.017251405	0.912768647	0.868832732	0.89025894
209	1	0	1	1	1	0.871028037	0.128971963	1	0.871028037	0.931068931	0.982748595	0.017251405	0.912768647	0.868832732	0.89025894
209	1	0	1	1	1	0.871028037	0.128971963	1	0.871028037	0.931068931	0.982748595	0.017251405	0.912768647	0.868832732	0.89025894
209	1	0	1	1	1	0.871028037	0.128971963	1	0.871028037	0.931068931	0.982748595	0.017251405	0.912768647	0.868832732	0.89025894
209	1	0	1	1	1	0.871028037	0.128971963	1	0.871028037	0.931068931	0.982748595	0.017251405	0.912768647	0.868832732	0.89025894
209	1	0	1	1	1	0.871028037	0.128971963	1	0.871028037	0.931068931	0.982748595	0.017251405	0.912768647	0.868832732	0.89025894
209	1	0	1	1	1	0.871028037	0.128971963	1	0.871028037	0.931068931	0.982748595	0.017251405	0.912768647	0.868832732	0.89025894
209	1	0	1	1	1	0.871028037	0.128971963	1	0.871028037	0.931068931	0.982748595	0.017251405	0.912768647	0.868832732	0.89025894
209	1	0	1	1	1	0.871028037	0.128971963	1	0.871028037	0.931068931	0.982748595	0.017251405	0.912768647	0.868832732	0.89025894
209	1	0	1	1	1	0.871028037	0.128971963	1	0.871028037	0.931068931	0.982748595	0.017251405	0.912768647	0.868832732	0.89025894
209	1	0	1	1	1	0.871028037	0.128971963	1	0.871028037	0.931068931	0.982748595	0.017251405	0.912768647	0.868832732	0.89025894
209	1	0	1	1	1	0.871028037	0.128971963	1	0.871028037	0.931068931	0.982748595	0.017251405	0.912768647	0.868832732	0.89025894
209	1	0	1	1	1	0.871028037	0.128971963	1	0.871028037	0.931068931	0.982748595	0.017251405	0.912768647	0.868832732	0.89025894
209	1	0	1	1	1	0.871028037	0.128971963	1	0.871028037	0.931068931	0.982748595	0.017251405	0.912768647	0.868832732	0.89025894
209	1	0	1	1	1	0.871028037	0.128971963	1	0.871028037	0.931068931	0.982748595	0.017251405	0.912768647	0.868832732	0.89025894
209	1	0	1	1	1	0.871028037	0.128971963	1	0.871028037	0.931068931	0.982748595	0.017251405	0.912768647	0.868832732	0.89025894
209	1	0	1	1	1	0.871028037	0.128971963	1	0.871028037	0.931068931	0.982748595	0.017251405	0.912768647	0.868832732	0.89025894
209	1	0	1	1	1	0.871028037	0.128971963	1	0.871028037	0.931068931	0.982748595	0.017251405	0.912768647	0.868832732	0.89025894
209	1	0	1	1	1	0.871028037	0.128971963	1	0.871028037	0.931068931	0.982748595	0.017251405	0.912768647	0.868832732	0.89025894
209	1	0	1	1	1	0.871028037	0.128971963	1	0.871028037	0.931068931	0.982748595	0.017251405	0.912768647	0.868832732	0.89025894
209	1	0	1	1	1	0.871028037	0.128971963	1	0.871028037	0.931068931	0.982748595	0.017251405	0.912768647	0.868832732	0.89025894
209	1	0	1	1	1	0.871028037	0.128971963	1	0.871028037	0.931068931	0.982748595	0.017251405	0.912768647	0.868832732	0.89025894
209	1	0	1	1	1	0.871028037	0.128971963	1	0.871028037	0.931068931	0.982748595	0.017251405	0.912768647	0.868832732	0.89025894
209	1	0	1	1	1	0.871028037	0.128971963	1	0.871028037	0.931068931	0.982748595	0.017251405	0.912768647	0.868832732	0.89025894
209	1	0	1	1	1	0.871028037	0.128971963	1	0.871028037	0.931068931	0.982748595	0.017251405	0.912768647	0.868832732	0.89025894
209	1	0	1	1	1	0.871028037	0.128971963	1	0.871028037	0.931068931	0.982748595	0.017251405	0.912768647	0.868832732	0.89025894
209	1	0	1	1	1	0.871028037	0.128971963	1	0.871028037	0.931068931	0.982748595	0.017251405	0.912768647	0.868832732	0.89025894
209	1	0	1	1	1	0.871028037	0.128971963	1	0.871028037	0.931068931	0.982748595	0.017251405	0.912768647	0.868832732	0.89025894
209	1	0	1	1	1	0.871028037	0.128971963	1	0.871028037	0.931068931	0.982748595	0.017251405	0.912768647	0.868832732	0.89025894
209	1	0	1	1	1	0.871028037	0.128971963	1	0.871028037	0.931068931	0.982748595	0.017251405	0.912768647	0.868832732	0.89025894
209	1	0	1	1	1	0.871028037	0.128971963	1	0.871028037	0.931068931	0.982748595	0.017251405	0.912768647	0.868832732	0.89025894
209	1	0	1	1	1	0.871028037	0.128971963	1	0.871028037	0.931068931	0.982748595	0.017251405	0.912768647	0.868832732	0.89025894
209	1	0	1	1	1	0.871028037	0.128971963	1	0.871028037	0.931068931	0.982748595	0.017251405	0.912768647	0.868832732	0.89025894
209	1	0	1	1	1	0.871028037	0.128971963	1	0.871028037	0.931068931	0.982748595	0.017251405	0.912768647	0.868832732	0.89025894
209	1	0	1	1	1	0.871028037	0.128971963	1	0.871028037	0.931068931	0.982748595	0.017251405	0.912768647	0.868832732	0.89025894
209	1	0	1	1	1	0.871028037	0.128971963	1	0.871028037	0.931068931	0.982748595	0.017251405	0.912768647	0.868832732	0.89025894
209	1	0	1	1	1	0.871028037	0.128971963	1	0.871028037	0.931068931	0.982748595	0.017251405	0.912768647	0.868832732	0.89025894
209	1	0	1	1	1	0.871028037	0.128971963	1	0.871028037	0.931068931	0.982748595	0.017251405	0.912768647	0.868832732	0.89025894
209	1	0	1	1	1	0.871028037	0.128971963	1	0.871028037	0.931068931	0.982748595	0.017251405	0.912768647	0.868832732	0.89025894
209	1	0	1	1	1	0.871028037	0.128971963	1	0.871028037	0.931068931	0.982748595	0.017251405	0.912768647	0.868832732	0.89025894
209	1	0	1	1	1	0.871028037	0.128971963	1	0.871028037	0.931068931	0.982748595	0.017251405	0.912768647	0.868832732	0.89025894
209	1	0	1	1	1	0.871028037	0.128971963	1	0.871028037	0.931068931	0.982748595	0.017251405	0.912768647	0.868832732	0.89025894
209	1	0	1	1	1	0.871028037	0.128971963	1	0.871028037	0.931068931	0.982748595	0.017251405	0.912768647	0.868832732	0.89025894
209	1	0	1	1	1	0.871028037	0.128971963	1	0.871028037	0.931068931	0.982748595	0.017251405	0.912768647	0.868832732	0.89025894
209	1	0	1	1	1	0.871028037	0.128971963	1	0.871028037	0.931068931	0.982748595	0.017251405	0.912768647	0.868832732	0.89025894
209	1	0	1	1	1	0.871028037	0.128971963	1	0.871028037	0.931068931	0.982748595	0.017251405	0.912768647	0.868832732	0.89025894
209	1	0	1	1	1	0.871028037	0.128971963	1	0.871028037	0.931068931	0.982748595	0.017251405	0.912768647	0.868832732	0.89025894
209	1	0	1	1	1	0.871028037	0.128971963	1	0.871028037	0.931068931	0.982748595	0.017251405	0.912768647	0.868832732	0.89025894
209	1	0	1	1	1	0.871028037	0.128971963	1	0.871028037	0.931068931	0.982748595	0.017251405	0.912768647	0.868832732	0.89025894
209	1	0	1	1	1	0.871028037	0.128971963	1	0.871028037	0.931068931	0.982748595	0.017251405	0.912768647	0.868832732	0.89025894
209	1	0	1	1	1	0.871028037	0.128971963	1	0.871028037	0.931068931	0.982748595	0.017251405	0.912768647	0.868832732	0.89025894
209	1	0	1	1	1	0.871028037	0.128971963	1	0.871028037	0.931068931	0.982748595	0.017251405	0.912768647	0.868832732	0.89025894
209	1	0	1	1	1	0.871028037	0.128971963	1	0.871028037	0.931068931	0.982748595	0.017251405	0.912768647	0.868832732	0.89025894
209	1	0	1	1	1	0.871028037	0.128971963	1	0.871028037	0.931068931	0.982748595	0.017251405	0.912768647	0.868832732	0.89025894
209	1	0	1	1	1	0.871028037	0.128971963	1	0.871028037	0.931068931	0.982748595	0.017251405	0.912768647	0.868832732	0.89025894
209	1	0	1	1	1	0.871028037	0.128971963	1	0.871028037	0.931068931	0.982748595	0.017251405	0.912768647	0.868832732	0.89025894
209	1	0	1	1	1	0.871028037	0.128971963	1	0.871028037	0.931068931	0.982748595	0.017251405	0.912768647	0.868832732	0.89025894
209	1	0	1	1	1	0.871028037	0.128971963	1	0.871028037	0.931068931	0.982748595	0.017251405	0.912768647	0.868832732	0.89025894
209	1	0	1	1	1	0.871028037	0.128971963	1	0.871028037	0.931068931	0.982748595	0.017251405	0.912768647	0.868832732	0.89025894
209	1	0	1	1	1	0.871028037	0.128971963	1	0.871028037	0.931068931	0.982748595	0.017251405	0.912768647	0.868832732	0.89025894
209	1	0	1	1	1	0.871028037	0.128971963	1	0.871028037	0.931068931	0.982748595	0.017251405	0.912768647	0.868832732	0.89025894
209	1	0	1	1	1	0.871028037	0.128971963	1	0.871028037	0.931068931	0.982748595	0.017251405	0.912768647	0.868832732	0.89025894
209	1	0	1	1	1	0.871028037	0.128971963	1	0.871028037	0.931068931	0.982748595	0.017251405	0.912768647	0.868832732	0.89025894
209	1	0	1	1	1	0.871028037	0.128971963	1	0.871028037	0.931068931	0.982748595	0.017251405	0.912768647	0.868832732	0.89025894
209	1	0	1	1	1	0.871028037	0.128971963	1	0.871028037	0.931068931	0.982748595	0.017251405	0.912768647	0.868832732	0.89025894
209	1	0	1	1	1	0.871028037	0.128971963	1	0.871028037	0.931068931	0.982748595	0.017251405	0.912768647	0.868832732	0.89025894
209	1	0	1	1	1	0.871028037	0.128971963	1	0.871028037	0.931068931	0.982748595	0.017251405	0.912768647	0.868832732	0.89025894
209	1	0	1	1	1	0.871028037	0.128971963	1	0.871028037	0.931068931	0.982748595	0.017251405	0.912768647	0.868832732	0.89025894
209	1	0	1	1	1	0.871028037	0.128971963	1	0.871028037	0.931068931	0.982748595	0.017251405	0.912768647	0.868832732	0.89025894
209	1	0	1	1	1	0.871028037	0.128971963	1	0.871028037	0.931068931	0.982748595	0.017251405	0.912768647	0.868832732	0.89025894
209	1	0	1	1	1	0.871028037	0.128971963	1	0.871028037	0.931068931	0.982748595	0.017251405	0.912768647	0.868832732	0.89025894
209	1	0	1	1	1	0.871028037	0.128971963	1	0.871028037	0.931068931	0.982748595	0.017251405	0.912768647	0.868832732	0.89025894
209	1	0	1	1	1	0.871028037	0.128971963	1	0.871028037	0.931068931	0.982748595	0.017251405	0.912768647	0.868832732	0.89025894
209	1	0	1	1	1	0.871028037	0.128971963	1	0.871028037	0.931068931	0.982748595	0.017251405	0.912768647	0.868832732	0.89025894
209	1	0	1	1	1	0.871028037	0.128971963	1	0.871028037	0.931068931	0.982748595	0.017251405	0.912768647	0.868832732	0.89025894
209	1	0	1	1	1	0.871028037	0.128971963	1	0.871028037	0.931068931	0.982748595	0.017251405	0.912768647	0.868832732	0.89025894
209	1	0	1	1	1	0.871028037	0.128971963	1	0.871028037	0.931068931	0.982748595	0.017251405	0.912768647	0.868832732	0.89025894
209	1	0	1	1	1	0.871028037	0.128971963	1	0.871028037	0.931068931	0.982748595	0.017251405	0.912768647	0.868832732	0.89025894
209	1	0	1	1	1	0.871028037	0.128971963	1	0.871028037	0.931068931	0.982748595	0.017251405	0.912768647	0.868832732	0.89025894
209	1	0	1	1	1	0.871028037	0.128971963	1	0.871028037	0.931068931	0.982748595	0.017251405	0.912768647	0.868832732	0.89025894
209	1	0	1	1	1	0.871028037	0.128971963	1	0.871028037	0.931068931	0.982748595	0.017251405	0.912768647	0.868832732	0.89025894
209	1	0	1	1	1	0.871028037	0.128971963	1	0.871028037	0.931068931	0.982748595	0.017251405	0.912768647	0.868832732	0.89025894
209	1	0	1	1	1	0.871028037	0.128971963	1	0.871028037	0.931068931	0.982748595	0.017251405	0.912768647	0.868832732	0.89025894
209	1	0	1	1	1	0.871028037	0.128971963	1	0.871028037	0.931068931	0.982748595	0.017251405	0.912768647	0.868832732	0.89025894
209	1	0	1	1	1	0.871028037	0.128971963	1	0.871028037	0.931068931	0.982748595	0.017251405	0.912768647	0.868832732	0.89025894
209	1	0	1	1	1	0.871028037	0.128971963	1	0.871028037	0.931068931	0.982748595	0.017251405	0.912768647	0.868832732	0.89025894
209	1	0	1	1	1	0.871028037	0.128971963	1	0.871028037	0.931068931	0.982748595	0.017251405	0.912768647	0.868832732	0.89025894
209	1	0	1	1	1	0.871028037	0.128971963	1	0.871028037	0.931068931	0.982748595	0.017251405	0.912768647	0.868832732	0.89025894
209	1	0	1	1	1	0.871028037	0.128971963	1	0.871028037	0.931068931	0.982748595	0.017251405	0.912768647	0.868832732	0.89025894
209	1	0	1	1	1	0.871028037	0.128971963	1	0.871028037	0.931068931	0.982748595	0.017251405	0.912768647	0.868832732	0.89025894
209	1	0	1	1	1	0.871028037	0.128971963	1	0.871028037	0.931068931	0.982748595	0.017251405	0.912768647	0.868832732	0.89025894
209	1	0	1	1	1	0.871028037	0.128971963	1	0.871028037	0.931068931	0.982748595	0.017251405	0.912768647	0.868832732	0.89025894
209	1	0	1	1	1	0.871028037	0.128971963	1	0.871028037	0.931068931	0.982748595	0.017251405	0.912768647	0.868832732	0.89025894
209	1	0	1	1	1	0.871028037	0.128971963	1	0.871028037	0.931068931	0.982748595	0.017251405	0.912768647	0.868832732	0.89025894
209	1	0	1	1	1	0.871028037	0.128971963	1	0.871028037	0.931068931	0.982748595	0.017251405	0.912768647	0.868832732	0.89025894
209	1	0	1	1	1	0.871028037	0.128971963	1	0.871028037	0.931068931	0.982748595	0.017251405	0.912768647	0.868832732	0.89025894
209	1	0	1	1	1	0.871028037	0.128971963	1	0.871028037	0.931068931	0.982748595	0.017251405	0.912768647	0.868832732	0.89025894
209	1	0	1	1	1	0.871028037	0.128971963	1	0.871028037	0.931068931	0.982748595	0.017251405	0.912768647	0.868832732	0.89025894
209	1	0	1	1	1	0.871028037	0.128971963	1	0.871028037	0.931068931	0.982748595	0.017251405	0.912768647	0.868832732	0.89025894
209	1	0	1	1	1	0.871028037	0.128971963	1	0.871028037	0.931068931	0.982748595	0.017251405	0.912768647	0.868832732	0.89025894
209	1	0	1	1	1	0.871028037	0.128971963	1	0.871028037	0.931068931	0.982748595	0.017251405	0.912768647	0.868832732	0.89025894
209	1	0	1	1	1	0.871028037	0.128971963	1	0.871028037	0.931068931	0.982748595	0.017251405	0.912768647	0.868832732	0.89025894
209	1	0	1	1	1	0.871028037	0.128971963	1	0.871028037	0.931068931	0.982748595	0.017251405	0.912768647	0.868832732	0.89025894
209	1	0	1	1	1	0.871028037	0.128971963	1	0.871028037	0.931068931	0.982748595	0.017251405	0.912768647	0.868832732	0.89025894
209	1	0	1	1	1	0.871028037	0.128971963	1	0.871028037	0.931068931	0.982748595	0.017251405	0.912768647	0.868832732	0.89025894
209	1	0	1	1	1	0.871028037	0.128971963	1	0.871028037	0.931068931	0.982748595	0.017251405	0.912768647	0.868832732	0.89025894
209	1	0	1	1	1	0.871028037	0.128971963	1	0.871028037	0.931068931	0.982748595	0.017251405	0.912768647	0.868832732	0.89025894
209	1	0	1	1	1	0.871028037	0.128971963	1	0.871028037	0.931068931	0.982748595	0.017251405	0.912768647	0.868832732	0.89025894
209	1	0	1	1	1	0.871028037	0.128971963	1	0.871028037	0.931068931	0.982748595	0.017251405	0.912768647	0.868832732	0.89025894
209	1	0	1	1	1	0.871028037	0.128971963	1	0.871028037	0.931068931	0.982748595	0.017251405	0.912768647	0.868832732	0.89025894
209	1	0	1	1	1	0.871028037	0.128971963	1	0.871028037	0.931068931	0.982748595	0.017251405	0.912768647	0.868832732	0.89025894
209	1	0	1	1	1	0.871028037	0.128971963	1	0.871028037	0.931068931	0.982748595	0.017251405	0.912768647	0.868832732	0.89025894
209	1	0	1	1	1	0.871028037	0.128971963	1	0.871028037	0.931068931	0.982748595	0.017251405	0.912768647	0.868832732	0.89025894
209	1	0	1	1	1	0.871028037	0.128971963	1	0.871028037	0.931068931	0.982748595	0.017251405	0.912768647	0.868832732	0.89025894
209	1	0	1	1	1	0.871028037	0.128971963	1	0.871028037	0.931068931	0.982748595	0.017251405	0.912768647	0.868832732	0.89025894
209	1	0	1	1	1	0.871028037	0.128971963	1	0.871028037	0.931068931	0.982748595	0.017251405	0.912768647	0.868832732	0.89025894
209	1	0	1	1	1	0.871028037	0.128971963	1	0.871028037	0.931068931	0.982748595	0.017251405	0.912768647	0.868832732	0.89025894
209	1	0	1	1	1	0.871028037	0.128971963	1	0.871028037	0.931068931	0.982748595	0.017251405	0.912768647	0.868832732	0.89025894
209	1	0	1	1	1	0.871028037	0.128971963	1	0.871028037	0.931068931	0.982748595	0.017251405	0.912768647	0.868832732	0.89025894
209	1	0	1	1	1	0.871028037	0.128971963	1	0.871028037	0.931068931	0.982748595	0.017251405	0.912768647	0.868832732	0.89025894
209	1	0	1	1	1	0.871028037	0.128971963	1	0.871028037	0.931068931	0.982748595	0.017251405	0.912768647	0.868832732	0.89025894
209	1	0	1	1	1	0.871028037	0.128971963	1	0.871028037	0.931068931	0.982748595	0.017251405	0.912768647	0.868832732	0.89025894
209	1	0	1	1	1	0.871028037	0.128971963	1	0.871028037	0.931068931	0.982748595	0.017251405	0.912768647	0.868832732	0.89025894
209	1	0	1	1	1	0.871028037	0.128971963	1	0.871028037	0.931068931	0.982748595	0.017251405	0.912768647	0.868832732	0.89025894
209	1	0	1	1	1	0.871028037	0.128971963	1	0.871028037	0.931068931	0.982748595	0.017251405	0.912768647	0.868832732	0.89025894
209	1	0	1	1	1	0.871028037	0.128971963	1	0.871028037	0.931068931	0.982748595	0.017251405	0.912768647	0.868832732	0.89025894
209	1	0	1	1	1	0.871028037	0.128971963	1	0.871028037	0.931068931	0.982748595	0.017251405	0.912768647	0.868832732	0.89025894
209	1	0	1	1	1	0.871028037	0.128971963	1	0.871028037	0.931068931	0.982748595	0.017251405	0.912768647	0.868832732	0.89025894
209	1	0	1	1	1	0.871028037	0.128971963	1	0.871028037	0.931068931	0.982748595	0.017251405	0.912768647	0.868832732	0.89025894
209	1	0	1	1	1	0.871028037	0.128971963	1	0.871028037	0.931068931	0.982748595	0.017251405	0.912768647	0.868832732	0.89025894
209	1	0	1	1	1	0.871028037	0.128971963	1	0.871028037	0.931068931	0.982748595	0.017251405	0.912768647	0.868832732	0.89025894
209	1	0	1	1	1	0.871028037	0.128971963	1	0.871028037	0.931068931	0.982748595	0.017251405	0.912768647	0.868832732	0.89025894
209	1	0	1	1	1	0.871028037	0.128971963	1	0.871028037	0.931068931	0.982748595	0.017251405	0.912768647	0.868832732	0.89025894
209	1	0	1	1	1	0.871028037	0.128971963	1	0.871028037	0.931068931	0.982748595	0.017251405	0.912768647	0.868832732	0.89025894
209	1	0	1	1	1	0.871028037	0.128971963	1	0.871028037	0.931068931	0.982748595	0.017251405	0.912768647	0.868832732	0.89025894
209	1	0	1	1	1	0.871028037	0.128971963	1	0.871028037	0.931068931	0.982748595	0.017251405	0.912768647	0.868832732	0.89025894
209	1	0	1	1	1	0.871028037	0.128971963	1	0.871028037	0.931068931	0.982748595	0.017251405	0.912768647	0.868832732	0.89025894
209	1	0	1	1	1	0.871028037	0.128971963	1	0.871028037	0.931068931	0.982748595	0.017251405	0.912768647	0.868832732	0.89025894
209	1	0	1	1	1	0.871028037	0.128971963	1	0.871028037	0.931068931	0.982748595	0.017251405	0.912768647	0.868832732	0.89025894
209	1	0	1	1	1	0.871028037	0.128971963	1	0.871028037	0.931068931	0.982748595	0.017251405	0.912768647	0.868832732	0.89025894
209	1	0	1	1	1	0.871028037	0.128971963	1	0.871028037	0.931068931	0.982748595	0.017251405	0.912768647	0.868832732	0.89025894
209	1	0	1	1	1	0.871028037	0.128971963	1	0.871028037	0.931068931	0.982748595	0.017251405	0.912768647	0.868832732	0.89025894
209	1	0	1	1	1	0.871028037	0.128971963	1	0.871028037	0.931068931	0.982748595	0.017251405	0.912768647	0.868832732	0.89025894
209	1	0	1	1	1	0.871028037	0.128971963	1	0.871028037	0.931068931	0.982748595	0.017251405	0.912768647	0.868832732	0.89025894
209	1	0	1	1	1	0.871028037	0.128971963	1	0.871028037	0.931068931	0.982748595	0.017251405	0.912768647	0.868832732	0.89025894
209	1	0	1	1	1	0.871028037	0.128971963	1	0.871028037	0.931068931	0.982748595	0.017251405	0.912768647	0.868832732	0.89025894
209	1	0	1	1	1	0.871028037	0.128971963	1	0.871028037	0.931068931	0.982748595	0.017251405	0.912768647	0.868832732	0.89025894
209	1	0	1	1	1	0.871028037	0.128971963	1	0.871028037	0.931068931	0.982748595	0.017251405	0.912768647	0.868832732	0.89025894
209	1	0	1	1	1	0.871028037	0.128971963	1	0.871028037	0.931068931	0.982748595	0.017251405	0.912768647	0.868832732	0.89025894
209	1	0	1	1	1	0.871028037	0.128971963	1	0.871028037	0.931068931	0.982748595	0.017251405	0.912768647	0.868832732	0.89025894
209	1	0	1	1	1	0.871028037	0.128971963	1	0.871028037	0.931068931	0.982748595	0.017251405	0.912768647	0.868832732	0.89025894
209	1	0	1	1	1	0.871028037	0.128971963	1	0.871028037	0.931068931	0.982748595	0.017251405	0.912768647	0.868832732	0.89025894
209	1	0	1	1	1	0.871028037	0.128971963	1	0.871028037	0.931068931	0.982748595	0.017251405	0.912768647	0.868832732	0.89025894
209	1	0	1	1	1	0.871028037	0.128971963	1	0.871028037	0.931068931	0.982748595	0.017251405	0.912768647	0.868832732	0.89025894
209	1	0	1	1	1	0.871028037	0.128971963	1	0.871028037	0.931068931	0.982748595	0.017251405	0.912768647	0.868832732	0.89025894
209	1	0	1	1	1	0.871028037	0.128971963	1	0.871028037	0.931068931	0.982748595	0.017251405	0.912768647	0.868832732	0.89025894
209	1	0	1	1	1	0.871028037	0.128971963	1	0.871028037	0.931068931	0.982748595	0.017251405	0.912768647	0.868832732	0.89025894
209	1	0	1	1	1	0.871028037	0.128971963	1	0.871028037	0.931068931	0.982748595	0.017251405	0.912768647	0.868832732	0.89025894
209	1	0	1	1	1	0.871028037	0.128971963	1	0.871028037	0.931068931	0.982748595	0.017251405	0.912768647	0.868832732	0.89025894
209	1	0	1	1	1	0.871028037	0.128971963	1	0.871028037	0.931068931	0.982748595	0.017251405	0.912768647	0.868832732	0.89025894
209	1	0	1	1	1	0.871028037	0.128971963	1	0.871028037	0.931068931	0.982748595	0.017251405	0.912768647	0.868832732	0.89025894
209	1	0	1	1	1	0.871028037	0.128971963	1	0.871028037	0.931068931	0.982748595	0.017251405	0.912768647	0.868832732	0.89025894
209	1	0	1	1	1	0.871028037	0.128971963	1	0.871028037	0.931068931	0.982748595	0.017251405	0.912768647	0.868832732	0.89025894
209	1	0	1	1	1	0.871028037	0.128971963	1	0.871028037	0.931068931	0.982748595	0.017251405	0.912768647	0.868832732	0.89025894
209	1	0	1	1	1	0.871028037	0.128971963	1	0.871028037	0.931068931	0.982748595	0.017251405	0.912768647	0.868832732	0.89025894
209	1	0	1	1	1	0.871028037	0.128971963	1	0.871028037	0.931068931	0.982748595	0.017251405	0.912768647	0.868832732	0.89025894
209	1	0	1	1	1	0.871028037	0.128971963	1	0.871028037	0.931068931	0.982748595	0.017251405	0.912768647	0.868832732	0.89025894
209	1	0	1	1	1	0.871028037	0.128971963	1	0.871028037	0.931068931	0.982748595	0.017251405	0.912768647	0.868832732	0.89025894
209	1	0	1	1	1	0.871028037	0.128971963	1	0.871028037	0.931068931	0.982748595	0.017251405	0.912768647	0.868832732	0.89025894
209	1	0	1	1	1	0.871028037	0.128971963	1	0.871028037	0.931068931	0.982748595	0.017251405	0.912768647	0.868832732	0.89025894
209	1	0	1	1	1	0.871028037	0.128971963	1	0.871028037	0.931068931	0.982748595	0.017251405	0.912768647	0.868832732	0.89025894
209	1	0	1	1	1	0.871028037	0.128971963	1	0.871028037	0.931068931	0.982748595	0.017251405	0.912768647	0.868832732	0.89025894
209	1	0	1	1	1	0.871028037	0.128971963	1	0.871028037	0.931068931	0.982748595	0.017251405	0.912768647	0.868832732	0.89025894
209	1	0	1	1	1	0.871028037	0.128971963	1	0.871028037	0.931068931	0.982748595	0.017251405	0.912768647	0.868832732	0.89025894
209	1	0	1	1	1	0.871028037	0.128971963	1	0.871028037	0.931068931	0.982748595	0.017251405	0.912768647	0.868832732	0.89025894
209	1	0	1	1	1	0.871028037	0.128971963	1	0.871028037	0.931068931	0.982748595	0.017251405	0.912768647	0.868832732	0.89025894
209	1	0	1	1	1	0.871028037	0.128971963	1	0.871028037	0.931068931	0.982748595	0.017251405	0.912768647	0.868832732	0.89025894
209	1	0	1	1	1	0.871028037	0.128971963	1	0.871028037	0.931068931	0.982748595	0.017251405	0.912768647	0.868832732	0.89025894
209	1	0	1	1	1	0.871028037	0.128971963	1	0.871028037	0.931068931	0.982748595	0.017251405	0.912768647	0.868832732	0.89025894
209	1	0	1	1	1	0.871028037	0.128971963	1	0.871028037	0.931068931	0.982748595	0.017251405	0.912768647	0.868832732	0.89025894
209	1	0	1	1	1	0.871028037	0.128971963	1	0.871028037	0.931068931	0.982748595	0.017251405	0.912768647	0.868832732	0.89025894
209	1	0	1	1	1	0.871028037	0.128971963	1	0.871028037	0.931068931	0.982748595	0.017251405	0.912768647	0.868832732	0.89025894
209	1	0	1	1	1	0.871028037	0.128971963	1	0.871028037	0.931068931	0.982748595	0.017251405	0.912768647	0.868832732	0.89025894
209	1	0	1	1	1	0.871028037	0.128971963	1	0.871028037	0.931068931	0.982748595	0.017251405	0.912768647	0.868832732	0.89025894
209	1	0	1	1	1	0.871028037	0.128971963	1	0.871028037	0.931068931	0.982748595	0.017251405	0.912768647	0.868832732	0.89025894
209	1	0	1	1	1	0.871028037	0.128971963	1	0.871028037	0.931068931	0.982748595	0.017251405	0.912768647	0.868832732	0.89025894
209	1	0	1	1	1	0.871028037	0.128971963	1	0.871028037	0.931068931	0.982748595	0.017251405	0.912768647	0.868832732	0.89025894
209	1	0	1	1	1	0.871028037	0.128971963	1	0.871028037	0.931068931	0.982748595	0.017251405	0.912768647	0.868832732	0.89025894
209	1	0	1	1	1	0.871028037	0.128971963	1	0.871028037	0.931068931	0.982748595	0.017251405	0.912768647	0.868832732	0.89025894
209	1	0	1	1	1	0.871028037	0.128971963	1	0.871028037	0.931068931	0.982748595	0.017251405	0.912768647	0.868832732	0.89025894
209	1	0	1	1	1	0.871028037	0.128971963	1	0.871028037	0.931068931	0.982748595	0.017251405	0.912768647	0.868832732	0.89025894
209	1	0	1	1	1	0.871028037	0.128971963	1	0.871028037	0.931068931	0.982748595	0.017251405	0.912768647	0.868832732	0.89025894
209	1	0	1	1	1	0.871028037	0.128971963	1	0.871028037	0.931068931	0.982748595	0.017251405	0.912768647	0.868832732	0.89025894
209	1	0	1	1	1	0.871028037	0.128971963	1	0.871028037	0.931068931	0.982748595	0.017251405	0.912768647	0.868832732	0.89025894
209	1	0	1	1	1	0.871028037	0.128971963	1	0.871028037	0.931068931	0.982748595	0.017251405	0.912768647	0.868832732	0.89025894
209	1	0	1	1	1	0.871028037	0.128971963	1	0.871028037	0.931068931	0.982748595	0.017251405	0.912768647	0.868832732	0.89025894
209	1	0	1	1	1	0.871028037	0.128971963	1	0.871028037	0.931068931	0.982748595	0.017251405	0.912768647	0.868832732	0.89025894
209	1	0	1	1	1	0.871028037	0.128971963	1	0.871028037	0.931068931	0.982748595	0.017251405	0.912768647	0.868832732	0.89025894
209	1	0	1	1	1	0.871028037	0.128971963	1	0.871028037	0.931068931	0.982748595	0.017251405	0.912768647	0.868832732	0.89025894
209	1	0	1	1	1	0.871028037	0.128971963	1	0.871028037	0.931068931	0.982748595	0.017251405	0.912768647	0.868832732	0.89025894
209	1	0	1	1	1	0.871028037	0.128971963	1	0.871028037	0.931068931	0.982748595	0.017251405	0.912768647	0.868832732	0.89025894
209	1	0	1	1	1	0.871028037	0.128971963	1	0.871028037	0.931068931	0.982748595	0.017251405	0.912768647	0.868832732	0.89025894
209	1	0	1	1	1	0.871028037	0.128971963	1	0.871028037	0.931068931	0.982748595	0.017251405	0.912768647	0.868832732	0.89025894
209	1	0	1	1	1	0.871028037	0.128971963	1	0.871028037	0.931068931	0.982748595	0.017251405	0.912768647	0.868832732	0.89025894
209	1	0	1	1	1	0.871028037	0.128971963	1	0.871028037	0.931068931	0.982748595	0.017251405	0.912768647	0.868832732	0.89025894
209	1	0	1	1	1	0.871028037	0.128971963	1	0.871028037	0.931068931	0.982748595	0.017251405	0.912768647	0.868832732	0.89025894
209	1	0	1	1	1	0.871028037	0.128971963	1	0.871028037	0.931068931	0.982748595	0.017251405	0.912768647	0.868832732	0.89025894
209	1	0	1	1	1	0.871028037	0.128971963	1	0.871028037	0.931068931	0.982748595	0.017251405	0.912768647	0.868832732	0.89025894
209	1	0	1	1	1	0.871028037	0.128971963	1	0.871028037	0.931068931	0.982748595	0.017251405	0.912768647	0.868832732	0.89025894
209	1	0	1	1	1	0.871028037	0.128971963	1	0.871028037	0.931068931	0.982748595	0.017251405	0.912768647	0.868832732	0.89025894
209	1	0	1	1	1	0.871028037	0.128971963	1	0.871028037	0.931068931	0.982748595	0.017251405	0.912768647	0.868832732	0.89025894
209	1	0	1	1	1	0.871028037	0.128971963	1	0.871028037	0.931068931	0.982748595	0.017251405	0.912768647	0.868832732	0.89025894
209	1	0	1	1	1	0.871028037	0.128971963	1	0.871028037	0.931068931	0.982748595	0.017251405	0.912768647	0.868832732	0.89025894
209	1	0	1	1	1	0.871028037	0.128971963	1	0.871028037	0.931068931	0.982748595	0.017251405	0.912768647	0.868832732	0.89025894
209	1	0	1	1	1	0.871028037	0.128971963	1	0.871028037	0.931068931	0.982748595	0.017251405	0.912768647	0.868832732	0.89025894
209	1	0	1	1	1	0.871028037	0.128971963	1	0.871028037	0.931068931	0.982748595	0.017251405	0.912768647	0.868832732	0.89025894
209	1	0	1	1	1	0.871028037	0.128971963	1	0.871028037	0.931068931	0.982748595	0.017251405	0.912768647	0.868832732	0.89025894
209	1	0	1	1	1	0.871028037	0.128971963	1	0.871028037	0.931068931	0.982748595	0.017251405	0.912768647	0.868832732	0.89025894
209	1	0	1	1	1	0.871028037	0.128971963	1	0.871028037	0.931068931	0.982748595	0.017251405	0.912768647	0.868832732	0.89025894
209	1	0	1	1	1	0.871028037	0.128971963	1	0.871028037	0.931068931	0.982748595	0.017251405	0.912768647	0.868832732	0.89025894
209	1	0	1	1	1	0.871028037	0.128971963	1	0.871028037	0.931068931	0.982748595	0.017251405	0.912768647	0.868832732	0.89025894
209	1	0	1	1	1	0.871028037	0.128971963	1	0.871028037	0.931068931	0.982748595	0.017251405	0.912768647	0.868832732	0.89025894
209	1	0	1	1	1	0.871028037	0.128971963	1	0.871028037	0.931068931	0.982748595	0.017251405	0.912768647	0.868832732	0.89025894
209	1	0	1	1	1	0.871028037	0.128971963	1	0.871028037	0.931068931	0.982748595	0.017251405	0.912768647	0.868832732	0.89025894
209	1	0	1	1	1	0.871028037	0.128971963	1	0.871028037	0.931068931	0.982748595	0.017251405	0.912768647	0.868832732	0.89025894
209	1	0	1	1	1	0.871028037	0.128971963	1	0.871028037	0.931068931	0.982748595	0.017251405	0.912768647	0.868832732	0.89025894
209	1	0	1	1	1	0.871028037	0.128971963	1	0.871028037	0.931068931	0.982748595	0.017251405	0.912768647	0.868832732	0.89025894
209	1	0	1	1	1	0.871028037	0.128971963	1	0.871028037	0.931068931	0.982748595	0.017251405	0.912768647	0.868832732	0.89025894
209	1	0	1	1	1	0.871028037	0.128971963	1	0.871028037	0.931068931	0.982748595	0.017251405	0.912768647	0.868832732	0.89025894
209	1	0	1	1	1	0.871028037	0.128971963	1	0.871028037	0.931068931	0.982748595	0.017251405	0.912768647	0.868832732	0.89025894
209	1	0	1	1	1	0.871028037	0.128971963	1	0.871028037	0.931068931	0.982748595	0.017251405	0.912768647	0.868832732	0.89025894
209	1	0	1	1	1	0.871028037	0.128971963	1	0.871028037	0.931068931	0.982748595	0.017251405	0.912768647	0.868832732	0.89025894
209	1	0	1	1	1	0.871028037	0.128971963	1	0.871028037	0.931068931	0.982748595	0.017251405	0.912768647	0.868832732	0.89025894
209	1	0	1	1	1	0.871028037	0.128971963	1	0.871028037	0.931068931	0.982748595	0.017251405	0.912768647	0.868832732	0.89025894
209	1	0	1	1	1	0.871028037	0.128971963	1	0.871028037	0.931068931	0.982748595	0.017251405	0.912768647	0.868832732	0.89025894
209	1	0	1	1	1	0.871028037	0.128971963	1	0.871028037	0.931068931	0.982748595	0.017251405	0.912768647	0.868832732	0.89025894
209	1	0	1	1	1	0.871028037	0.128971963	1	0.871028037	0.931068931	0.982748595	0.017251405	0.912768647	0.868832732	0.89025894
209	1	0	1	1	1	0.871028037	0.128971963	1	0.871028037	0.931068931	0.982748595	0.017251405	0.912768647	0.868832732	0.89025894
209	1	0	1	1	1	0.871028037	0.128971963	1	0.871028037	0.931068931	0.982748595	0.017251405	0.912768647	0.868832732	0.89025894
209	1	0	1	1	1	0.871028037	0.128971963	1	0.871028037	0.931068931	0.982748595	0.017251405	0.912768647	0.868832732	0.89025894
209	1	0	1	1	1	0.871028037	0.128971963	1	0.871028037	0.931068931	0.982748595	0.017251405	0.912768647	0.868832732	0.89025894
209	1	0	1	1	1	0.871028037	0.128971963	1	0.871028037	0.931068931	0.982748595	0.017251405	0.912768647	0.868832732	0.89025894
209	1	0	1	1	1	0.871028037	0.128971963	1	0.871028037	0.931068931	0.982748595	0.017251405	0.912768647	0.868832732	0.89025894
209	1	0	1	1	1	0.871028037	0.128971963	1	0.871028037	0.931068931	0.982748595	0.017251405	0.912768647	0.868832732	0.89025894
209	1	0	1	1	1	0.871028037	0.128971963	1	0.871028037	0.931068931	0.982748595	0.017251405	0.912768647	0.868832732	0.89025894
209	1	0	1	1	1	0.871028037	0.128971963	1	0.871028037	0.931068931	0.982748595	0.017251405	0.912768647	0.868832732	0.89025894
209	1	0	1	1	1	0.871028037	0.128971963	1	0.871028037	0.931068931	0.982748595	0.017251405	0.912768647	0.868832732	0.89025894
209	1	0	1	1	1	0.871028037	0.128971963	1	0.871028037	0.931068931	0.982748595	0.017251405	0.912768647	0.868832732	0.89025894
209	1	0	1	1	1	0.871028037	0.128971963	1	0.871028037	0.931068931	0.982748595	0.017251405	0.912768647	0.868832732	0.89025894
209	1	0	1	1	1	0.871028037	0.128971963	1	0.871028037	0.931068931	0.982748595	0.017251405	0.912768647	0.868832732	0.89025894
209	1	0	1	1	1	0.871028037	0.128971963	1	0.871028037	0.931068931	0.982748595	0.017251405	0.912768647	0.868832732	0.89025894
209	1	0	1	1	1	0.871028037	0.128971963	1	0.871028037	0.931068931	0.982748595	0.017251405	0.912768647	0.868832732	0.89025894
209	1	0	1	1	1	0.871028037	0.128971963	1	0.871028037	0.931068931	0.982748595	0.017251405	0.912768647	0.868832732	0.89025894
209	1	0	1	1	1	0.871028037	0.128971963	1	0.871028037	0.931068931	0.982748595	0.017251405	0.912768647	0.868832732	0.89025894
209	1	0	1	1	1	0.871028037	0.128971963	1	0.871028037	0.931068931	0.982748595	0.017251405	0.912768647	0.868832732	0.89025894
209	1	0	1	1	1	0.871028037	0.128971963	1	0.871028037	0.931068931	0.982748595	0.017251405	0.912768647	0.868832732	0.89025894
209	1	0	1	1	1	0.871028037	0.128971963	1	0.871028037	0.931068931	0.982748595	0.017251405	0.912768647	0.868832732	0.89025894
209	1	0	1	1	1	0.871028037	0.128971963	1	0.871028037	0.931068931	0.982748595	0.017251405	0.912768647	0.868832732	0.89025894
209	1	0	1	1	1	0.871028037	0.128971963	1	0.871028037	0.931068931	0.982748595	0.017251405	0.912768647	0.868832732	0.89025894
209	1	0	1	1	1	0.871028037	0.128971963	1	0.871028037	0.931068931	0.982748595	0.017251405	0.912768647	0.868832732	0.89025894
209	1	0	1	1	1	0.871028037	0.128971963	1	0.871028037	0.931068931	0.982748595	0.017251405	0.912768647	0.868832732	0.89025894
209	1	0	1	1	1	0.871028037	0.128971963	1	0.871028037	0.931068931	0.982748595	0.017251405	0.912768647	0.868832732	0.89025894
209	1	0	1	1	1	0.871028037	0.128971963	1	0.871028037	0.931068931	0.982748595	0.017251405	0.912768647	0.868832732	0.89025894
209	1	0	1	1	1	0.871028037	0.128971963	1	0.871028037	0.931068931	0.982748595	0.017251405	0.912768647	0.868832732	0.89025894
209	1	0	1	1	1	0.871028037	0.128971963	1	0.871028037	0.931068931	0.982748595	0.017251405	0.912768647	0.868832732	0.89025894
209	1	0	1	1	1	0.871028037	0.128971963	1	0.871028037	0.931068931	0.982748595	0.017251405	0.912768647	0.868832732	0.89025894
209	1	0	1	1	1	0.871028037	0.128971963	1	0.871028037	0.931068931	0.982748595	0.017251405	0.912768647	0.868832732	0.89025894
209	1	0	1	1	1	0.871028037	0.128971963	1	0.871028037	0.931068931	0.982748595	0.017251405	0.912768647	0.868832732	0.89025894
209	1	0	1	1	1	0.871028037	0.128971963	1	0.871028037	0.931068931	0.982748595	0.017251405	0.912768647	0.868832732	0.89025894
209	1	0	1	1	1	0.871028037	0.128971963	1	0.871028037	0.931068931	0.982748595	0.017251405	0.912768647	0.868832732	0.89025894
209	1	0	1	1	1	0.871028037	0.128971963	1	0.871028037	0.931068931	0.982748595	0.017251405	0.912768647	0.868832732	0.89025894
209	1	0	1	1	1	0.871028037	0.128971963	1	0.871028037	0.931068931	0.982748595	0.017251405	0.912768647	0.868832732	0.89025894
209	1	0	1	1	1	0.871028037	0.128971963	1	0.871028037	0.931068931	0.982748595	0.017251405	0.912768647	0.868832732	0.89025894
209	1	0	1	1	1	0.871028037	0.128971963	1	0.871028037	0.931068931	0.982748595	0.017251405	0.912768647	0.868832732	0.89025894
209	1	0	1	1	1	0.871028037	0.128971963	1	0.871028037	0.931068931	0.982748595	0.017251405	0.912768647	0.868832732	0.89025894
209	1	0	1	1	1	0.871028037	0.128971963	1	0.871028037	0.931068931	0.982748595	0.017251405	0.912768647	0.868832732	0.89025894
209	1	0	1	1	1	0.871028037	0.128971963	1	0.871028037	0.931068931	0.982748595	0.017251405	0.912768647	0.868832732	0.89025894
209	1	0	1	1	1	0.871028037	0.128971963	1	0.871028037	0.931068931	0.982748595	0.017251405	0.912768647	0.868832732	0.89025894
209	1	0	1	1	1	0.871028037	0.128971963	1	0.871028037	0.931068931	0.982748595	0.017251405	0.912768647	0.868832732	0.89025894
209	1	0	1	1	1	0.871028037	0.128971963	1	0.871028037	0.931068931	0.982748595	0.017251405	0.912768647	0.868832732	0.89025894
209	1	0	1	1	1	0.871028037	0.128971963	1	0.871028037	0.931068931	0.982748595	0.017251405	0.912768647	0.868832732	0.89025894
209	1	0	1	1	1	0.871028037	0.128971963	1	0.871028037	0.931068931	0.982748595	0.017251405	0.912768647	0.868832732	0.89025894
209	1	0	1	1	1	0.871028037	0.128971963	1	0.871028037	0.931068931	0.982748595	0.017251405	0.912768647	0.868832732	0.89025894
209	1	0	1	1	1	0.871028037	0.128971963	1	0.871028037	0.931068931	0.982748595	0.017251405	0.912768647	0.868832732	0.89025894
209	1	0	1	1	1	0.871028037	0.128971963	1	0.871028037	0.931068931	0.982748595	0.017251405	0.912768647	0.868832732	0.89025894
209	1	0	1	1	1	0.871028037	0.128971963	1	0.871028037	0.931068931	0.982748595	0.017251405	0.912768647	0.868832732	0.89025894
209	1	0	1	1	1	0.871028037	0.128971963	1	0.871028037	0.931068931	0.982748595	0.017251405	0.912768647	0.868832732	0.89025894
209	1	0	1	1	1	0.871028037	0.128971963	1	0.871028037	0.931068931	0.982748595	0.017251405	0.912768647	0.868832732	0.89025894
209	1	0	1	1	1	0.871028037	0.128971963	1	0.871028037	0.931068931	0.982748595	0.017251405	0.912768647	0.868832732	0.89025894
209	1	0	1	1	1	0.871028037	0.128971963	1	0.871028037	0.931068931	0.982748595	0.017251405	0.912768647	0.868832732	0.89025894
209	1	0	1	1	1	0.871028037	0.128971963	1	0.871028037	0.931068931	0.982748595	0.017251405	0.912768647	0.868832732	0.89025894
209	1	0	1	1	1	0.871028037	0.128971963	1	0.871028037	0.931068931	0.982748595	0.017251405	0.912768647	0.868832732	0.89025894
209	1	0	1	1	1	0.871028037	0.128971963	1	0.871028037	0.931068931	0.982748595	0.017251405	0.912768647	0.868832732	0.89025894
209	1	0	1	1	1	0.871028037	0.128971963	1	0.871028037	0.931068931	0.982748595	0.017251405	0.912768647	0.868832732	0.89025894
209	1	0	1	1	1	0.871028037	0.128971963	1	0.871028037	0.931068931	0.982748595	0.017251405	0.912768647	0.868832732	0.89025894
209	1	0	1	1	1	0.871028037	0.128971963	1	0.871028037	0.931068931	0.982748595	0.017251405	0.912768647	0.868832732	0.89025894
209	1	0	1	1	1	0.871028037	0.128971963	1	0.871028037	0.931068931	0.982748595	0.017251405	0.912768647	0.868832732	0.89025894
209	1	0	1	1	1	0.871028037	0.128971963	1	0.871028037	0.931068931	0.982748595	0.017251405	0.912768647	0.868832732	0.89025894
209	1	0	1	1	1	0.871028037	0.128971963	1	0.871028037	0.931068931	0.982748595	0.017251405	0.912768647	0.868832732	0.89025894
209	1	0	1	1	1	0.871028037	0.128971963	1	0.871028037	0.931068931	0.982748595	0.017251405	0.912768647	0.868832732	0.89025894
209	1	0	1	1	1	0.871028037	0.128971963	1	0.871028037	0.931068931	0.982748595	0.017251405	0.912768647	0.868832732	0.89025894
209	1	0	1	1	1	0.871028037	0.128971963	1	0.871028037	0.931068931	0.982748595	0.017251405	0.912768647	0.868832732	0.89025894
209	1	0	1	1	1	0.871028037	0.128971963	1	0.871028037	0.931068931	0.982748595	0.017251405	0.912768647	0.868832732	0.89025894
209	1	0	1	1	1	0.871028037	0.128971963	1	0.871028037	0.931068931	0.982748595	0.017251405	0.912768647	0.868832732	0.89025894
209	1	0	1	1	1	0.871028037	0.128971963	1	0.871028037	0.931068931	0.982748595	0.017251405	0.912768647	0.868832732	0.89025894
209	1	0	1	1	1	0.871028037	0.128971963	1	0.871028037	0.931068931	0.982748595	0.017251405	0.912768647	0.868832732	0.89025894
209	1	0	1	1	1	0.871028037	0.128971963	1	0.871028037	0.931068931	0.982748595	0.017251405	0.912768647	0.868832732	0.89025894
209	1	0	1	1	1	0.871028037	0.128971963	1	0.871028037	0.931068931	0.982748595	0.017251405	0.912768647	0.868832732	0.89025894
209	1	0	1	1	1	0.871028037	0.128971963	1	0.871028037	0.931068931	0.982748595	0.017251405	0.912768647	0.868832732	0.89025894
209	1	0	1	1	1	0.871028037	0.128971963	1	0.871028037	0.931068931	0.982748595	0.017251405	0.912768647	0.868832732	0.89025894
209	1	0	1	1	1	0.871028037	0.128971963	1	0.871028037	0.931068931	0.982748595	0.017251405	0.912768647	0.868832732	0.89025894
209	1	0	1	1	1	0.871028037	0.128971963	1	0.871028037	0.931068931	0.982748595	0.017251405	0.912768647	0.868832732	0.89025894
209	1	0	1	1	1	0.871028037	0.128971963	1	0.871028037	0.931068931	0.982748595	0.017251405	0.912768647	0.868832732	0.89025894
209	1	0	1	1	1	0.871028037	0.128971963	1	0.871028037	0.931068931	0.982748595	0.017251405	0.912768647	0.868832732	0.89025894
209	1	0	1	1	1	0.871028037	0.128971963	1	0.871028037	0.931068931	0.982748595	0.017251405	0.912768647	0.868832732	0.89025894
209	1	0	1	1	1	0.871028037	0.128971963	1	0.871028037	0.931068931	0.982748595	0.017251405	0.912768647	0.868832732	0.89025894
209	1	0	1	1	1	0.871028037	0.128971963	1	0.871028037	0.931068931	0.982748595	0.017251405	0.912768647	0.868832732	0.89025894
209	1	0	1	1	1	0.871028037	0.128971963	1	0.871028037	0.931068931	0.982748595	0.017251405	0.912768647	0.868832732	0.89025894
209	1	0	1	1	1	0.871028037	0.128971963	1	0.871028037	0.931068931	0.982748595	0.017251405	0.912768647	0.868832732	0.89025894
209	1	0	1	1	1	0.871028037	0.128971963	1	0.871028037	0.931068931	0.982748595	0.017251405	0.912768647	0.868832732	0.89025894
209	1	0	1	1	1	0.871028037	0.128971963	1	0.871028037	0.931068931	0.982748595	0.017251405	0.912768647	0.868832732	0.89025894
209	1	0	1	1	1	0.871028037	0.128971963	1	0.871028037	0.931068931	0.982748595	0.017251405	0.912768647	0.868832732	0.89025894
209	1	0	1	1	1	0.871028037	0.128971963	1	0.871028037	0.931068931	0.982748595	0.017251405	0.912768647	0.868832732	0.89025894
209	1	0	1	1	1	0.871028037	0.128971963	1	0.871028037	0.931068931	0.982748595	0.017251405	0.912768647	0.868832732	0.89025894
209	1	0	1	1	1	0.871028037	0.128971963	1	0.871028037	0.931068931	0.982748595	0.017251405	0.912768647	0.868832732	0.89025894
209	1	0	1	1	1	0.871028037	0.128971963	1	0.871028037	0.931068931	0.982748595	0.017251405	0.912768647	0.868832732	0.89025894
209	1	0	1	1	1	0.871028037	0.128971963	1	0.871028037	0.931068931	0.982748595	0.017251405	0.912768647	0.868832732	0.89025894
209	1	0	1	1	1	0.871028037	0.128971963	1	0.871028037	0.931068931	0.982748595	0.017251405	0.912768647	0.868832732	0.89025894
209	1	0	1	1	1	0.871028037	0.128971963	1	0.871028037	0.931068931	0.982748595	0.017251405	0.912768647	0.868832732	0.89025894
209	1	0	1	1	1	0.871028037	0.128971963	1	0.871028037	0.931068931	0.982748595	0.017251405	0.912768647	0.868832732	0.89025894
209	1	0	1	1	1	0.871028037	0.128971963	1	0.871028037	0.931068931	0.982748595	0.017251405	0.912768647	0.868832732	0.89025894
209	1	0	1	1	1	0.871028037	0.128971963	1	0.871028037	0.931068931	0.982748595	0.017251405	0.912768647	0.868832732	0.89025894
209	1	0	1	1	1	0.871028037	0.128971963	1	0.871028037	0.931068931	0.982748595	0.017251405	0.912768647	0.868832732	0.89025894
209	1	0	1	1	1	0.871028037	0.128971963	1	0.871028037	0.931068931	0.982748595	0.017251405	0.912768647	0.868832732	0.89025894
209	1	0	1	1	1	0.871028037	0.128971963	1	0.871028037	0.931068931	0.982748595	0.017251405	0.912768647	0.868832732	0.89025894
209	1	0	1	1	1	0.871028037	0.128971963	1	0.871028037	0.931068931	0.982748595	0.017251405	0.912768647	0.868832732	0.89025894
209	1	0	1	1	1	0.871028037	0.128971963	1	0.871028037	0.931068931	0.982748595	0.017251405	0.912768647	0.868832732	0.89025894
209	1	0	1	1	1	0.871028037	0.128971963	1	0.871028037	0.931068931	0.982748595	0.017251405	0.912768647	0.868832732	0.89025894
209	1	0	1	1	1	0.871028037	0.128971963	1	0.871028037	0.931068931	0.982748595	0.017251405	0.912768647	0.868832732	0.89025894
209	1	0	1	1	1	0.871028037	0.128971963	1	0.871028037	0.931068931	0.982748595	0.017251405	0.912768647	0.868832732	0.89025894
209	1	0	1	1	1	0.871028037	0.128971963	1	0.871028037	0.931068931	0.982748595	0.017251405	0.912768647	0.868832732	0.89025894
209	1	0	1	1	1	0.871028037	0.128971963	1	0.871028037	0.931068931	0.982748595	0.017251405	0.912768647	0.868832732	0.89025894
209	1	0	1	1	1	0.871028037	0.128971963	1	0.871028037	0.931068931	0.982748595	0.017251405	0.912768647	0.868832732	0.89025894
209	1	0	1	1	1	0.871028037	0.128971963	1	0.871028037	0.931068931	0.982748595	0.017251405	0.912768647	0.868832732	0.89025894
209	1	0	1	1	1	0.871028037	0.128971963	1	0.871028037	0.931068931	0.982748595	0.017251405	0.912768647	0.868832732	0.89025894
209	1	0	1	1	1	0.871028037	0.128971963	1	0.871028037	0.931068931	0.982748595	0.017251405	0.912768647	0.868832732	0.89025894
209	1	0	1	1	1	0.871028037	0.128971963	1	0.871028037	0.931068931	0.982748595	0.017251405	0.912768647	0.868832732	0.89025894
209	1	0	1	1	1	0.871028037	0.128971963	1	0.871028037	0.931068931	0.982748595	0.017251405	0.912768647	0.868832732	0.89025894
209	1	0	1	1	1	0.871028037	0.128971963	1	0.871028037	0.931068931	0.982748595	0.017251405	0.912768647	0.868832732	0.89025894
209	1	0	1	1	1	0.871028037	0.128971963	1	0.871028037	0.931068931	0.982748595	0.017251405	0.912768647	0.868832732	0.89025894
209	1	0	1	1	1	0.871028037	0.128971963	1	0.871028037	0.931068931	0.982748595	0.017251405	0.912768647	0.868832732	0.89025894
