# Supplementary material for: An Improved Hybrid Feature Selection Algorithm for Electric Charge Recovery Risk
Source: Hindawi journal article supplement (doi:10.1155/2020/8479341), 2020-08-28
Supplement: f1 [file 8479341.f1.zip › 8479341.f1/Experimental Results/201808/BABC_results.csv]

features_num	Accuracy_high	Loss_high	Precission_high	Recall_high	F1_high	Accuracy_med	Loss_med	Precission_med	Recall_med	F1_med	Accuracy_low	Loss_low	Precission_low	Recall_low	F1_low
325	1.0	0.0	1.0	1.0	1.0	0.8806366047745358	0.11936339522546424	0.9939393939393939	0.8840970350404312	0.9358059914407988	0.9433265286283659	0.05667347137163414	0.6942231075697212	0.7163412127440905	0.7051087506322712
325	1.0	0.0	1.0	1.0	1.0	0.8806366047745358	0.11936339522546424	0.9939393939393939	0.8840970350404312	0.9358059914407988	0.9433265286283659	0.05667347137163414	0.6942231075697212	0.7163412127440905	0.7051087506322712
325	1.0	0.0	1.0	1.0	1.0	0.8806366047745358	0.11936339522546424	0.9939393939393939	0.8840970350404312	0.9358059914407988	0.9433265286283659	0.05667347137163414	0.6942231075697212	0.7163412127440905	0.7051087506322712
322	1.0	0.0	1.0	1.0	1.0	0.8848484848484849	0.11515151515151512	0.9986301369863013	0.8857837181044957	0.9388280746941403	0.9557306869040669	0.04426931309593307	0.7299539170506912	0.8301886792452831	0.7768513977439921
322	1.0	0.0	1.0	1.0	1.0	0.8848484848484849	0.11515151515151512	0.9986301369863013	0.8857837181044957	0.9388280746941403	0.9557306869040669	0.04426931309593307	0.7299539170506912	0.8301886792452831	0.7768513977439921
322	1.0	0.0	1.0	1.0	1.0	0.8848484848484849	0.11515151515151512	0.9986301369863013	0.8857837181044957	0.9388280746941403	0.9557306869040669	0.04426931309593307	0.7299539170506912	0.8301886792452831	0.7768513977439921
322	1.0	0.0	1.0	1.0	1.0	0.8848484848484849	0.11515151515151512	0.9986301369863013	0.8857837181044957	0.9388280746941403	0.9557306869040669	0.04426931309593307	0.7299539170506912	0.8301886792452831	0.7768513977439921
322	1.0	0.0	1.0	1.0	1.0	0.8848484848484849	0.11515151515151512	0.9986301369863013	0.8857837181044957	0.9388280746941403	0.9557306869040669	0.04426931309593307	0.7299539170506912	0.8301886792452831	0.7768513977439921
322	1.0	0.0	1.0	1.0	1.0	0.8848484848484849	0.11515151515151512	0.9986301369863013	0.8857837181044957	0.9388280746941403	0.9557306869040669	0.04426931309593307	0.7299539170506912	0.8301886792452831	0.7768513977439921
322	1.0	0.0	1.0	1.0	1.0	0.8848484848484849	0.11515151515151512	0.9986301369863013	0.8857837181044957	0.9388280746941403	0.9557306869040669	0.04426931309593307	0.7299539170506912	0.8301886792452831	0.7768513977439921
322	1.0	0.0	1.0	1.0	1.0	0.8848484848484849	0.11515151515151512	0.9986301369863013	0.8857837181044957	0.9388280746941403	0.9557306869040669	0.04426931309593307	0.7299539170506912	0.8301886792452831	0.7768513977439921
322	1.0	0.0	1.0	1.0	1.0	0.8848484848484849	0.11515151515151512	0.9986301369863013	0.8857837181044957	0.9388280746941403	0.9557306869040669	0.04426931309593307	0.7299539170506912	0.8301886792452831	0.7768513977439921
322	1.0	0.0	1.0	1.0	1.0	0.8848484848484849	0.11515151515151512	0.9986301369863013	0.8857837181044957	0.9388280746941403	0.9557306869040669	0.04426931309593307	0.7299539170506912	0.8301886792452831	0.7768513977439921
322	1.0	0.0	1.0	1.0	1.0	0.8848484848484849	0.11515151515151512	0.9986301369863013	0.8857837181044957	0.9388280746941403	0.9557306869040669	0.04426931309593307	0.7299539170506912	0.8301886792452831	0.7768513977439921
322	1.0	0.0	1.0	1.0	1.0	0.8848484848484849	0.11515151515151512	0.9986301369863013	0.8857837181044957	0.9388280746941403	0.9557306869040669	0.04426931309593307	0.7299539170506912	0.8301886792452831	0.7768513977439921
322	1.0	0.0	1.0	1.0	1.0	0.8848484848484849	0.11515151515151512	0.9986301369863013	0.8857837181044957	0.9388280746941403	0.9557306869040669	0.04426931309593307	0.7299539170506912	0.8301886792452831	0.7768513977439921
322	1.0	0.0	1.0	1.0	1.0	0.8848484848484849	0.11515151515151512	0.9986301369863013	0.8857837181044957	0.9388280746941403	0.9557306869040669	0.04426931309593307	0.7299539170506912	0.8301886792452831	0.7768513977439921
306	1.0	0.0	1.0	1.0	1.0	0.854614412136536	0.145385587863464	0.9985207100591716	0.8555133079847909	0.9215017064846417	0.9651061355045071	0.03489386449549292	0.8399570354457573	0.7875125881168177	0.812889812889813
306	1.0	0.0	1.0	1.0	1.0	0.854614412136536	0.145385587863464	0.9985207100591716	0.8555133079847909	0.9215017064846417	0.9651061355045071	0.03489386449549292	0.8399570354457573	0.7875125881168177	0.812889812889813
306	1.0	0.0	1.0	1.0	1.0	0.854614412136536	0.145385587863464	0.9985207100591716	0.8555133079847909	0.9215017064846417	0.9651061355045071	0.03489386449549292	0.8399570354457573	0.7875125881168177	0.812889812889813
306	1.0	0.0	1.0	1.0	1.0	0.854614412136536	0.145385587863464	0.9985207100591716	0.8555133079847909	0.9215017064846417	0.9651061355045071	0.03489386449549292	0.8399570354457573	0.7875125881168177	0.812889812889813
306	1.0	0.0	1.0	1.0	1.0	0.854614412136536	0.145385587863464	0.9985207100591716	0.8555133079847909	0.9215017064846417	0.9651061355045071	0.03489386449549292	0.8399570354457573	0.7875125881168177	0.812889812889813
306	1.0	0.0	1.0	1.0	1.0	0.854614412136536	0.145385587863464	0.9985207100591716	0.8555133079847909	0.9215017064846417	0.9651061355045071	0.03489386449549292	0.8399570354457573	0.7875125881168177	0.812889812889813
312	1.0	0.0	1.0	1.0	1.0	0.8312925170068027	0.16870748299319727	1.0	0.8306010928961749	0.9074626865671642	0.9696239151398264	0.030376084860173624	0.875	0.8156638013371538	0.8442906574394463
312	1.0	0.0	1.0	1.0	1.0	0.8312925170068027	0.16870748299319727	1.0	0.8306010928961749	0.9074626865671642	0.9696239151398264	0.030376084860173624	0.875	0.8156638013371538	0.8442906574394463
312	1.0	0.0	1.0	1.0	1.0	0.8312925170068027	0.16870748299319727	1.0	0.8306010928961749	0.9074626865671642	0.9696239151398264	0.030376084860173624	0.875	0.8156638013371538	0.8442906574394463
312	1.0	0.0	1.0	1.0	1.0	0.8312925170068027	0.16870748299319727	1.0	0.8306010928961749	0.9074626865671642	0.9696239151398264	0.030376084860173624	0.875	0.8156638013371538	0.8442906574394463
312	1.0	0.0	1.0	1.0	1.0	0.8312925170068027	0.16870748299319727	1.0	0.8306010928961749	0.9074626865671642	0.9696239151398264	0.030376084860173624	0.875	0.8156638013371538	0.8442906574394463
312	1.0	0.0	1.0	1.0	1.0	0.8312925170068027	0.16870748299319727	1.0	0.8306010928961749	0.9074626865671642	0.9696239151398264	0.030376084860173624	0.875	0.8156638013371538	0.8442906574394463
312	1.0	0.0	1.0	1.0	1.0	0.8312925170068027	0.16870748299319727	1.0	0.8306010928961749	0.9074626865671642	0.9696239151398264	0.030376084860173624	0.875	0.8156638013371538	0.8442906574394463
312	1.0	0.0	1.0	1.0	1.0	0.8312925170068027	0.16870748299319727	1.0	0.8306010928961749	0.9074626865671642	0.9696239151398264	0.030376084860173624	0.875	0.8156638013371538	0.8442906574394463
311	1.0	0.0	1.0	1.0	1.0	0.8144104803493449	0.18558951965065507	1.0	0.8144104803493449	0.8977135980746089	0.9801038910124473	0.019896108987552674	0.8330039525691699	0.9612314709236032	0.8925357331921651
311	1.0	0.0	1.0	1.0	1.0	0.8144104803493449	0.18558951965065507	1.0	0.8144104803493449	0.8977135980746089	0.9801038910124473	0.019896108987552674	0.8330039525691699	0.9612314709236032	0.8925357331921651
311	1.0	0.0	1.0	1.0	1.0	0.8144104803493449	0.18558951965065507	1.0	0.8144104803493449	0.8977135980746089	0.9801038910124473	0.019896108987552674	0.8330039525691699	0.9612314709236032	0.8925357331921651
311	1.0	0.0	1.0	1.0	1.0	0.8144104803493449	0.18558951965065507	1.0	0.8144104803493449	0.8977135980746089	0.9801038910124473	0.019896108987552674	0.8330039525691699	0.9612314709236032	0.8925357331921651
311	1.0	0.0	1.0	1.0	1.0	0.8144104803493449	0.18558951965065507	1.0	0.8144104803493449	0.8977135980746089	0.9801038910124473	0.019896108987552674	0.8330039525691699	0.9612314709236032	0.8925357331921651
311	1.0	0.0	1.0	1.0	1.0	0.8144104803493449	0.18558951965065507	1.0	0.8144104803493449	0.8977135980746089	0.9801038910124473	0.019896108987552674	0.8330039525691699	0.9612314709236032	0.8925357331921651
311	1.0	0.0	1.0	1.0	1.0	0.8144104803493449	0.18558951965065507	1.0	0.8144104803493449	0.8977135980746089	0.9801038910124473	0.019896108987552674	0.8330039525691699	0.9612314709236032	0.8925357331921651
311	1.0	0.0	1.0	1.0	1.0	0.8144104803493449	0.18558951965065507	1.0	0.8144104803493449	0.8977135980746089	0.9801038910124473	0.019896108987552674	0.8330039525691699	0.9612314709236032	0.8925357331921651
311	1.0	0.0	1.0	1.0	1.0	0.8144104803493449	0.18558951965065507	1.0	0.8144104803493449	0.8977135980746089	0.9801038910124473	0.019896108987552674	0.8330039525691699	0.9612314709236032	0.8925357331921651
311	1.0	0.0	1.0	1.0	1.0	0.8144104803493449	0.18558951965065507	1.0	0.8144104803493449	0.8977135980746089	0.9801038910124473	0.019896108987552674	0.8330039525691699	0.9612314709236032	0.8925357331921651
311	1.0	0.0	1.0	1.0	1.0	0.8144104803493449	0.18558951965065507	1.0	0.8144104803493449	0.8977135980746089	0.9801038910124473	0.019896108987552674	0.8330039525691699	0.9612314709236032	0.8925357331921651
311	1.0	0.0	1.0	1.0	1.0	0.8144104803493449	0.18558951965065507	1.0	0.8144104803493449	0.8977135980746089	0.9801038910124473	0.019896108987552674	0.8330039525691699	0.9612314709236032	0.8925357331921651
311	1.0	0.0	1.0	1.0	1.0	0.8144104803493449	0.18558951965065507	1.0	0.8144104803493449	0.8977135980746089	0.9801038910124473	0.019896108987552674	0.8330039525691699	0.9612314709236032	0.8925357331921651
311	1.0	0.0	1.0	1.0	1.0	0.8144104803493449	0.18558951965065507	1.0	0.8144104803493449	0.8977135980746089	0.9801038910124473	0.019896108987552674	0.8330039525691699	0.9612314709236032	0.8925357331921651
311	1.0	0.0	1.0	1.0	1.0	0.8144104803493449	0.18558951965065507	1.0	0.8144104803493449	0.8977135980746089	0.9801038910124473	0.019896108987552674	0.8330039525691699	0.9612314709236032	0.8925357331921651
311	1.0	0.0	1.0	1.0	1.0	0.8144104803493449	0.18558951965065507	1.0	0.8144104803493449	0.8977135980746089	0.9801038910124473	0.019896108987552674	0.8330039525691699	0.9612314709236032	0.8925357331921651
311	1.0	0.0	1.0	1.0	1.0	0.8144104803493449	0.18558951965065507	1.0	0.8144104803493449	0.8977135980746089	0.9801038910124473	0.019896108987552674	0.8330039525691699	0.9612314709236032	0.8925357331921651
311	1.0	0.0	1.0	1.0	1.0	0.8144104803493449	0.18558951965065507	1.0	0.8144104803493449	0.8977135980746089	0.9801038910124473	0.019896108987552674	0.8330039525691699	0.9612314709236032	0.8925357331921651
311	1.0	0.0	1.0	1.0	1.0	0.8144104803493449	0.18558951965065507	1.0	0.8144104803493449	0.8977135980746089	0.9801038910124473	0.019896108987552674	0.8330039525691699	0.9612314709236032	0.8925357331921651
311	1.0	0.0	1.0	1.0	1.0	0.8144104803493449	0.18558951965065507	1.0	0.8144104803493449	0.8977135980746089	0.9801038910124473	0.019896108987552674	0.8330039525691699	0.9612314709236032	0.8925357331921651
311	1.0	0.0	1.0	1.0	1.0	0.8144104803493449	0.18558951965065507	1.0	0.8144104803493449	0.8977135980746089	0.9801038910124473	0.019896108987552674	0.8330039525691699	0.9612314709236032	0.8925357331921651
311	1.0	0.0	1.0	1.0	1.0	0.8144104803493449	0.18558951965065507	1.0	0.8144104803493449	0.8977135980746089	0.9801038910124473	0.019896108987552674	0.8330039525691699	0.9612314709236032	0.8925357331921651
311	1.0	0.0	1.0	1.0	1.0	0.8144104803493449	0.18558951965065507	1.0	0.8144104803493449	0.8977135980746089	0.9801038910124473	0.019896108987552674	0.8330039525691699	0.9612314709236032	0.8925357331921651
311	1.0	0.0	1.0	1.0	1.0	0.8144104803493449	0.18558951965065507	1.0	0.8144104803493449	0.8977135980746089	0.9801038910124473	0.019896108987552674	0.8330039525691699	0.9612314709236032	0.8925357331921651
311	1.0	0.0	1.0	1.0	1.0	0.8144104803493449	0.18558951965065507	1.0	0.8144104803493449	0.8977135980746089	0.9801038910124473	0.019896108987552674	0.8330039525691699	0.9612314709236032	0.8925357331921651
311	1.0	0.0	1.0	1.0	1.0	0.8144104803493449	0.18558951965065507	1.0	0.8144104803493449	0.8977135980746089	0.9801038910124473	0.019896108987552674	0.8330039525691699	0.9612314709236032	0.8925357331921651
311	1.0	0.0	1.0	1.0	1.0	0.8144104803493449	0.18558951965065507	1.0	0.8144104803493449	0.8977135980746089	0.9801038910124473	0.019896108987552674	0.8330039525691699	0.9612314709236032	0.8925357331921651
311	1.0	0.0	1.0	1.0	1.0	0.8144104803493449	0.18558951965065507	1.0	0.8144104803493449	0.8977135980746089	0.9801038910124473	0.019896108987552674	0.8330039525691699	0.9612314709236032	0.8925357331921651
311	1.0	0.0	1.0	1.0	1.0	0.8144104803493449	0.18558951965065507	1.0	0.8144104803493449	0.8977135980746089	0.9801038910124473	0.019896108987552674	0.8330039525691699	0.9612314709236032	0.8925357331921651
311	1.0	0.0	1.0	1.0	1.0	0.8144104803493449	0.18558951965065507	1.0	0.8144104803493449	0.8977135980746089	0.9801038910124473	0.019896108987552674	0.8330039525691699	0.9612314709236032	0.8925357331921651
311	1.0	0.0	1.0	1.0	1.0	0.8144104803493449	0.18558951965065507	1.0	0.8144104803493449	0.8977135980746089	0.9801038910124473	0.019896108987552674	0.8330039525691699	0.9612314709236032	0.8925357331921651
311	1.0	0.0	1.0	1.0	1.0	0.8144104803493449	0.18558951965065507	1.0	0.8144104803493449	0.8977135980746089	0.9801038910124473	0.019896108987552674	0.8330039525691699	0.9612314709236032	0.8925357331921651
311	1.0	0.0	1.0	1.0	1.0	0.8144104803493449	0.18558951965065507	1.0	0.8144104803493449	0.8977135980746089	0.9801038910124473	0.019896108987552674	0.8330039525691699	0.9612314709236032	0.8925357331921651
311	1.0	0.0	1.0	1.0	1.0	0.8144104803493449	0.18558951965065507	1.0	0.8144104803493449	0.8977135980746089	0.9801038910124473	0.019896108987552674	0.8330039525691699	0.9612314709236032	0.8925357331921651
311	1.0	0.0	1.0	1.0	1.0	0.8144104803493449	0.18558951965065507	1.0	0.8144104803493449	0.8977135980746089	0.9801038910124473	0.019896108987552674	0.8330039525691699	0.9612314709236032	0.8925357331921651
311	1.0	0.0	1.0	1.0	1.0	0.8144104803493449	0.18558951965065507	1.0	0.8144104803493449	0.8977135980746089	0.9801038910124473	0.019896108987552674	0.8330039525691699	0.9612314709236032	0.8925357331921651
311	1.0	0.0	1.0	1.0	1.0	0.8144104803493449	0.18558951965065507	1.0	0.8144104803493449	0.8977135980746089	0.9801038910124473	0.019896108987552674	0.8330039525691699	0.9612314709236032	0.8925357331921651
311	1.0	0.0	1.0	1.0	1.0	0.8144104803493449	0.18558951965065507	1.0	0.8144104803493449	0.8977135980746089	0.9801038910124473	0.019896108987552674	0.8330039525691699	0.9612314709236032	0.8925357331921651
311	1.0	0.0	1.0	1.0	1.0	0.8144104803493449	0.18558951965065507	1.0	0.8144104803493449	0.8977135980746089	0.9801038910124473	0.019896108987552674	0.8330039525691699	0.9612314709236032	0.8925357331921651
311	1.0	0.0	1.0	1.0	1.0	0.8144104803493449	0.18558951965065507	1.0	0.8144104803493449	0.8977135980746089	0.9801038910124473	0.019896108987552674	0.8330039525691699	0.9612314709236032	0.8925357331921651
311	1.0	0.0	1.0	1.0	1.0	0.8144104803493449	0.18558951965065507	1.0	0.8144104803493449	0.8977135980746089	0.9801038910124473	0.019896108987552674	0.8330039525691699	0.9612314709236032	0.8925357331921651
311	1.0	0.0	1.0	1.0	1.0	0.8144104803493449	0.18558951965065507	1.0	0.8144104803493449	0.8977135980746089	0.9801038910124473	0.019896108987552674	0.8330039525691699	0.9612314709236032	0.8925357331921651
311	1.0	0.0	1.0	1.0	1.0	0.8144104803493449	0.18558951965065507	1.0	0.8144104803493449	0.8977135980746089	0.9801038910124473	0.019896108987552674	0.8330039525691699	0.9612314709236032	0.8925357331921651
311	1.0	0.0	1.0	1.0	1.0	0.8144104803493449	0.18558951965065507	1.0	0.8144104803493449	0.8977135980746089	0.9801038910124473	0.019896108987552674	0.8330039525691699	0.9612314709236032	0.8925357331921651
311	1.0	0.0	1.0	1.0	1.0	0.8144104803493449	0.18558951965065507	1.0	0.8144104803493449	0.8977135980746089	0.9801038910124473	0.019896108987552674	0.8330039525691699	0.9612314709236032	0.8925357331921651
311	1.0	0.0	1.0	1.0	1.0	0.8144104803493449	0.18558951965065507	1.0	0.8144104803493449	0.8977135980746089	0.9801038910124473	0.019896108987552674	0.8330039525691699	0.9612314709236032	0.8925357331921651
311	1.0	0.0	1.0	1.0	1.0	0.8144104803493449	0.18558951965065507	1.0	0.8144104803493449	0.8977135980746089	0.9801038910124473	0.019896108987552674	0.8330039525691699	0.9612314709236032	0.8925357331921651
311	1.0	0.0	1.0	1.0	1.0	0.8144104803493449	0.18558951965065507	1.0	0.8144104803493449	0.8977135980746089	0.9801038910124473	0.019896108987552674	0.8330039525691699	0.9612314709236032	0.8925357331921651
311	1.0	0.0	1.0	1.0	1.0	0.8144104803493449	0.18558951965065507	1.0	0.8144104803493449	0.8977135980746089	0.9801038910124473	0.019896108987552674	0.8330039525691699	0.9612314709236032	0.8925357331921651
311	1.0	0.0	1.0	1.0	1.0	0.8144104803493449	0.18558951965065507	1.0	0.8144104803493449	0.8977135980746089	0.9801038910124473	0.019896108987552674	0.8330039525691699	0.9612314709236032	0.8925357331921651
311	1.0	0.0	1.0	1.0	1.0	0.8144104803493449	0.18558951965065507	1.0	0.8144104803493449	0.8977135980746089	0.9801038910124473	0.019896108987552674	0.8330039525691699	0.9612314709236032	0.8925357331921651
311	1.0	0.0	1.0	1.0	1.0	0.8144104803493449	0.18558951965065507	1.0	0.8144104803493449	0.8977135980746089	0.9801038910124473	0.019896108987552674	0.8330039525691699	0.9612314709236032	0.8925357331921651
311	1.0	0.0	1.0	1.0	1.0	0.8144104803493449	0.18558951965065507	1.0	0.8144104803493449	0.8977135980746089	0.9801038910124473	0.019896108987552674	0.8330039525691699	0.9612314709236032	0.8925357331921651
311	1.0	0.0	1.0	1.0	1.0	0.8144104803493449	0.18558951965065507	1.0	0.8144104803493449	0.8977135980746089	0.9801038910124473	0.019896108987552674	0.8330039525691699	0.9612314709236032	0.8925357331921651
311	1.0	0.0	1.0	1.0	1.0	0.8144104803493449	0.18558951965065507	1.0	0.8144104803493449	0.8977135980746089	0.9801038910124473	0.019896108987552674	0.8330039525691699	0.9612314709236032	0.8925357331921651
311	1.0	0.0	1.0	1.0	1.0	0.8144104803493449	0.18558951965065507	1.0	0.8144104803493449	0.8977135980746089	0.9801038910124473	0.019896108987552674	0.8330039525691699	0.9612314709236032	0.8925357331921651
311	1.0	0.0	1.0	1.0	1.0	0.8144104803493449	0.18558951965065507	1.0	0.8144104803493449	0.8977135980746089	0.9801038910124473	0.019896108987552674	0.8330039525691699	0.9612314709236032	0.8925357331921651
311	1.0	0.0	1.0	1.0	1.0	0.8144104803493449	0.18558951965065507	1.0	0.8144104803493449	0.8977135980746089	0.9801038910124473	0.019896108987552674	0.8330039525691699	0.9612314709236032	0.8925357331921651
311	1.0	0.0	1.0	1.0	1.0	0.8144104803493449	0.18558951965065507	1.0	0.8144104803493449	0.8977135980746089	0.9801038910124473	0.019896108987552674	0.8330039525691699	0.9612314709236032	0.8925357331921651
311	1.0	0.0	1.0	1.0	1.0	0.8144104803493449	0.18558951965065507	1.0	0.8144104803493449	0.8977135980746089	0.9801038910124473	0.019896108987552674	0.8330039525691699	0.9612314709236032	0.8925357331921651
311	1.0	0.0	1.0	1.0	1.0	0.8144104803493449	0.18558951965065507	1.0	0.8144104803493449	0.8977135980746089	0.9801038910124473	0.019896108987552674	0.8330039525691699	0.9612314709236032	0.8925357331921651
311	1.0	0.0	1.0	1.0	1.0	0.8144104803493449	0.18558951965065507	1.0	0.8144104803493449	0.8977135980746089	0.9801038910124473	0.019896108987552674	0.8330039525691699	0.9612314709236032	0.8925357331921651
311	1.0	0.0	1.0	1.0	1.0	0.8144104803493449	0.18558951965065507	1.0	0.8144104803493449	0.8977135980746089	0.9801038910124473	0.019896108987552674	0.8330039525691699	0.9612314709236032	0.8925357331921651
311	1.0	0.0	1.0	1.0	1.0	0.8144104803493449	0.18558951965065507	1.0	0.8144104803493449	0.8977135980746089	0.9801038910124473	0.019896108987552674	0.8330039525691699	0.9612314709236032	0.8925357331921651
311	1.0	0.0	1.0	1.0	1.0	0.8144104803493449	0.18558951965065507	1.0	0.8144104803493449	0.8977135980746089	0.9801038910124473	0.019896108987552674	0.8330039525691699	0.9612314709236032	0.8925357331921651
311	1.0	0.0	1.0	1.0	1.0	0.8144104803493449	0.18558951965065507	1.0	0.8144104803493449	0.8977135980746089	0.9801038910124473	0.019896108987552674	0.8330039525691699	0.9612314709236032	0.8925357331921651
311	1.0	0.0	1.0	1.0	1.0	0.8144104803493449	0.18558951965065507	1.0	0.8144104803493449	0.8977135980746089	0.9801038910124473	0.019896108987552674	0.8330039525691699	0.9612314709236032	0.8925357331921651
311	1.0	0.0	1.0	1.0	1.0	0.8144104803493449	0.18558951965065507	1.0	0.8144104803493449	0.8977135980746089	0.9801038910124473	0.019896108987552674	0.8330039525691699	0.9612314709236032	0.8925357331921651
311	1.0	0.0	1.0	1.0	1.0	0.8144104803493449	0.18558951965065507	1.0	0.8144104803493449	0.8977135980746089	0.9801038910124473	0.019896108987552674	0.8330039525691699	0.9612314709236032	0.8925357331921651
