# Supplementary material for: An Improved Hybrid Feature Selection Algorithm for Electric Charge Recovery Risk
Source: Hindawi journal article supplement (doi:10.1155/2020/8479341), 2020-08-28
Supplement: f1 [file 8479341.f1.zip › 8479341.f1/Experimental Results/201808/BABC_SBS_results.csv]

features_num	Accuracy_high	Loss_high	Precission_high	Recall_high	F1_high	Accuracy_med	Loss_med	Precission_med	Recall_med	F1_med	Accuracy_low	Loss_low	Precission_low	Recall_low	F1_low
316	1	0	1	1	1	0.887339056	0.112660944	0.99758162	0.889008621	0.94017094	0.967871881	0.032128119	0.757045675	0.910046729	0.826525199
315	1	0	1	1	1	0.890257559	0.109742441	0.998742138	0.891133558	0.941874259	0.969779951	0.030220049	0.794820717	0.885682575	0.837795276
314	1	0	1	1	1	0.88963964	0.11036036	0.998734177	0.890519187	0.941527446	0.970381232	0.029618768	0.8	0.887417219	0.84144427
314	1	0	1	1	1	0.88963964	0.11036036	0.998734177	0.890519187	0.941527446	0.970381232	0.029618768	0.8	0.887417219	0.84144427
313	1	0	1	1	1	0.893258427	0.106741573	0.998742138	0.894144144	0.943553179	0.970082127	0.029917873	0.796039604	0.889380531	0.840125392
312	1	0	1	1	1	0.889897843	0.110102157	0.99872449	0.890784983	0.941671678	0.971378333	0.028621667	0.809381238	0.888280394	0.846997389
312	1	0	1	1	1	0.889897843	0.110102157	0.99872449	0.890784983	0.941671678	0.971378333	0.028621667	0.809381238	0.888280394	0.846997389
312	1	0	1	1	1	0.889897843	0.110102157	0.99872449	0.890784983	0.941671678	0.971378333	0.028621667	0.809381238	0.888280394	0.846997389
312	1	0	1	1	1	0.889897843	0.110102157	0.99872449	0.890784983	0.941671678	0.971378333	0.028621667	0.809381238	0.888280394	0.846997389
312	1	0	1	1	1	0.889897843	0.110102157	0.99872449	0.890784983	0.941671678	0.971378333	0.028621667	0.809381238	0.888280394	0.846997389
312	1	0	1	1	1	0.889897843	0.110102157	0.99872449	0.890784983	0.941671678	0.971378333	0.028621667	0.809381238	0.888280394	0.846997389
312	1	0	1	1	1	0.889897843	0.110102157	0.99872449	0.890784983	0.941671678	0.971378333	0.028621667	0.809381238	0.888280394	0.846997389
312	1	0	1	1	1	0.889897843	0.110102157	0.99872449	0.890784983	0.941671678	0.971378333	0.028621667	0.809381238	0.888280394	0.846997389
312	1	0	1	1	1	0.889897843	0.110102157	0.99872449	0.890784983	0.941671678	0.971378333	0.028621667	0.809381238	0.888280394	0.846997389
312	1	0	1	1	1	0.889897843	0.110102157	0.99872449	0.890784983	0.941671678	0.971378333	0.028621667	0.809381238	0.888280394	0.846997389
312	1	0	1	1	1	0.889897843	0.110102157	0.99872449	0.890784983	0.941671678	0.971378333	0.028621667	0.809381238	0.888280394	0.846997389
312	1	0	1	1	1	0.889897843	0.110102157	0.99872449	0.890784983	0.941671678	0.971378333	0.028621667	0.809381238	0.888280394	0.846997389
312	1	0	1	1	1	0.889897843	0.110102157	0.99872449	0.890784983	0.941671678	0.971378333	0.028621667	0.809381238	0.888280394	0.846997389
312	1	0	1	1	1	0.889897843	0.110102157	0.99872449	0.890784983	0.941671678	0.971378333	0.028621667	0.809381238	0.888280394	0.846997389
312	1	0	1	1	1	0.889897843	0.110102157	0.99872449	0.890784983	0.941671678	0.971378333	0.028621667	0.809381238	0.888280394	0.846997389
312	1	0	1	1	1	0.889897843	0.110102157	0.99872449	0.890784983	0.941671678	0.971378333	0.028621667	0.809381238	0.888280394	0.846997389
312	1	0	1	1	1	0.889897843	0.110102157	0.99872449	0.890784983	0.941671678	0.971378333	0.028621667	0.809381238	0.888280394	0.846997389
312	1	0	1	1	1	0.889897843	0.110102157	0.99872449	0.890784983	0.941671678	0.971378333	0.028621667	0.809381238	0.888280394	0.846997389
312	1	0	1	1	1	0.889897843	0.110102157	0.99872449	0.890784983	0.941671678	0.971378333	0.028621667	0.809381238	0.888280394	0.846997389
312	1	0	1	1	1	0.889897843	0.110102157	0.99872449	0.890784983	0.941671678	0.971378333	0.028621667	0.809381238	0.888280394	0.846997389
312	1	0	1	1	1	0.889897843	0.110102157	0.99872449	0.890784983	0.941671678	0.971378333	0.028621667	0.809381238	0.888280394	0.846997389
312	1	0	1	1	1	0.889897843	0.110102157	0.99872449	0.890784983	0.941671678	0.971378333	0.028621667	0.809381238	0.888280394	0.846997389
312	1	0	1	1	1	0.889897843	0.110102157	0.99872449	0.890784983	0.941671678	0.971378333	0.028621667	0.809381238	0.888280394	0.846997389
312	1	0	1	1	1	0.889897843	0.110102157	0.99872449	0.890784983	0.941671678	0.971378333	0.028621667	0.809381238	0.888280394	0.846997389
312	1	0	1	1	1	0.889897843	0.110102157	0.99872449	0.890784983	0.941671678	0.971378333	0.028621667	0.809381238	0.888280394	0.846997389
311	1	0	1	1	1	0.889897843	0.110102157	0.99872449	0.890784983	0.941671678	0.971476018	0.028523982	0.809571286	0.889375685	0.847599165
311	1	0	1	1	1	0.889897843	0.110102157	0.99872449	0.890784983	0.941671678	0.971476018	0.028523982	0.809571286	0.889375685	0.847599165
311	1	0	1	1	1	0.889897843	0.110102157	0.99872449	0.890784983	0.941671678	0.971476018	0.028523982	0.809571286	0.889375685	0.847599165
311	1	0	1	1	1	0.889897843	0.110102157	0.99872449	0.890784983	0.941671678	0.971476018	0.028523982	0.809571286	0.889375685	0.847599165
311	1	0	1	1	1	0.889897843	0.110102157	0.99872449	0.890784983	0.941671678	0.971476018	0.028523982	0.809571286	0.889375685	0.847599165
311	1	0	1	1	1	0.889897843	0.110102157	0.99872449	0.890784983	0.941671678	0.971476018	0.028523982	0.809571286	0.889375685	0.847599165
311	1	0	1	1	1	0.889897843	0.110102157	0.99872449	0.890784983	0.941671678	0.971476018	0.028523982	0.809571286	0.889375685	0.847599165
311	1	0	1	1	1	0.889897843	0.110102157	0.99872449	0.890784983	0.941671678	0.971476018	0.028523982	0.809571286	0.889375685	0.847599165
311	1	0	1	1	1	0.889897843	0.110102157	0.99872449	0.890784983	0.941671678	0.971476018	0.028523982	0.809571286	0.889375685	0.847599165
311	1	0	1	1	1	0.889897843	0.110102157	0.99872449	0.890784983	0.941671678	0.971476018	0.028523982	0.809571286	0.889375685	0.847599165
311	1	0	1	1	1	0.889897843	0.110102157	0.99872449	0.890784983	0.941671678	0.971476018	0.028523982	0.809571286	0.889375685	0.847599165
311	1	0	1	1	1	0.889897843	0.110102157	0.99872449	0.890784983	0.941671678	0.971476018	0.028523982	0.809571286	0.889375685	0.847599165
311	1	0	1	1	1	0.889897843	0.110102157	0.99872449	0.890784983	0.941671678	0.971476018	0.028523982	0.809571286	0.889375685	0.847599165
311	1	0	1	1	1	0.889897843	0.110102157	0.99872449	0.890784983	0.941671678	0.971476018	0.028523982	0.809571286	0.889375685	0.847599165
311	1	0	1	1	1	0.889897843	0.110102157	0.99872449	0.890784983	0.941671678	0.971476018	0.028523982	0.809571286	0.889375685	0.847599165
311	1	0	1	1	1	0.889897843	0.110102157	0.99872449	0.890784983	0.941671678	0.971476018	0.028523982	0.809571286	0.889375685	0.847599165
311	1	0	1	1	1	0.889897843	0.110102157	0.99872449	0.890784983	0.941671678	0.971476018	0.028523982	0.809571286	0.889375685	0.847599165
311	1	0	1	1	1	0.889897843	0.110102157	0.99872449	0.890784983	0.941671678	0.971476018	0.028523982	0.809571286	0.889375685	0.847599165
311	1	0	1	1	1	0.889897843	0.110102157	0.99872449	0.890784983	0.941671678	0.971476018	0.028523982	0.809571286	0.889375685	0.847599165
311	1	0	1	1	1	0.889897843	0.110102157	0.99872449	0.890784983	0.941671678	0.971476018	0.028523982	0.809571286	0.889375685	0.847599165
311	1	0	1	1	1	0.889897843	0.110102157	0.99872449	0.890784983	0.941671678	0.971476018	0.028523982	0.809571286	0.889375685	0.847599165
311	1	0	1	1	1	0.889897843	0.110102157	0.99872449	0.890784983	0.941671678	0.971476018	0.028523982	0.809571286	0.889375685	0.847599165
311	1	0	1	1	1	0.889897843	0.110102157	0.99872449	0.890784983	0.941671678	0.971476018	0.028523982	0.809571286	0.889375685	0.847599165
311	1	0	1	1	1	0.889897843	0.110102157	0.99872449	0.890784983	0.941671678	0.971476018	0.028523982	0.809571286	0.889375685	0.847599165
311	1	0	1	1	1	0.889897843	0.110102157	0.99872449	0.890784983	0.941671678	0.971476018	0.028523982	0.809571286	0.889375685	0.847599165
311	1	0	1	1	1	0.889897843	0.110102157	0.99872449	0.890784983	0.941671678	0.971476018	0.028523982	0.809571286	0.889375685	0.847599165
310	1	0	1	1	1	0.893835616	0.106164384	0.998722861	0.894736842	0.943874472	0.971685218	0.028314782	0.812127237	0.889978214	0.849272349
310	1	0	1	1	1	0.893835616	0.106164384	0.998722861	0.894736842	0.943874472	0.971685218	0.028314782	0.812127237	0.889978214	0.849272349
310	1	0	1	1	1	0.893835616	0.106164384	0.998722861	0.894736842	0.943874472	0.971685218	0.028314782	0.812127237	0.889978214	0.849272349
310	1	0	1	1	1	0.893835616	0.106164384	0.998722861	0.894736842	0.943874472	0.971685218	0.028314782	0.812127237	0.889978214	0.849272349
310	1	0	1	1	1	0.893835616	0.106164384	0.998722861	0.894736842	0.943874472	0.971685218	0.028314782	0.812127237	0.889978214	0.849272349
310	1	0	1	1	1	0.893835616	0.106164384	0.998722861	0.894736842	0.943874472	0.971685218	0.028314782	0.812127237	0.889978214	0.849272349
310	1	0	1	1	1	0.893835616	0.106164384	0.998722861	0.894736842	0.943874472	0.971685218	0.028314782	0.812127237	0.889978214	0.849272349
310	1	0	1	1	1	0.893835616	0.106164384	0.998722861	0.894736842	0.943874472	0.971685218	0.028314782	0.812127237	0.889978214	0.849272349
310	1	0	1	1	1	0.893835616	0.106164384	0.998722861	0.894736842	0.943874472	0.971685218	0.028314782	0.812127237	0.889978214	0.849272349
310	1	0	1	1	1	0.893835616	0.106164384	0.998722861	0.894736842	0.943874472	0.971685218	0.028314782	0.812127237	0.889978214	0.849272349
310	1	0	1	1	1	0.893835616	0.106164384	0.998722861	0.894736842	0.943874472	0.971685218	0.028314782	0.812127237	0.889978214	0.849272349
310	1	0	1	1	1	0.893835616	0.106164384	0.998722861	0.894736842	0.943874472	0.971685218	0.028314782	0.812127237	0.889978214	0.849272349
310	1	0	1	1	1	0.893835616	0.106164384	0.998722861	0.894736842	0.943874472	0.971685218	0.028314782	0.812127237	0.889978214	0.849272349
310	1	0	1	1	1	0.893835616	0.106164384	0.998722861	0.894736842	0.943874472	0.971685218	0.028314782	0.812127237	0.889978214	0.849272349
310	1	0	1	1	1	0.893835616	0.106164384	0.998722861	0.894736842	0.943874472	0.971685218	0.028314782	0.812127237	0.889978214	0.849272349
310	1	0	1	1	1	0.893835616	0.106164384	0.998722861	0.894736842	0.943874472	0.971685218	0.028314782	0.812127237	0.889978214	0.849272349
310	1	0	1	1	1	0.893835616	0.106164384	0.998722861	0.894736842	0.943874472	0.971685218	0.028314782	0.812127237	0.889978214	0.849272349
310	1	0	1	1	1	0.893835616	0.106164384	0.998722861	0.894736842	0.943874472	0.971685218	0.028314782	0.812127237	0.889978214	0.849272349
310	1	0	1	1	1	0.893835616	0.106164384	0.998722861	0.894736842	0.943874472	0.971685218	0.028314782	0.812127237	0.889978214	0.849272349
310	1	0	1	1	1	0.893835616	0.106164384	0.998722861	0.894736842	0.943874472	0.971685218	0.028314782	0.812127237	0.889978214	0.849272349
310	1	0	1	1	1	0.893835616	0.106164384	0.998722861	0.894736842	0.943874472	0.971685218	0.028314782	0.812127237	0.889978214	0.849272349
310	1	0	1	1	1	0.893835616	0.106164384	0.998722861	0.894736842	0.943874472	0.971685218	0.028314782	0.812127237	0.889978214	0.849272349
310	1	0	1	1	1	0.893835616	0.106164384	0.998722861	0.894736842	0.943874472	0.971685218	0.028314782	0.812127237	0.889978214	0.849272349
310	1	0	1	1	1	0.893835616	0.106164384	0.998722861	0.894736842	0.943874472	0.971685218	0.028314782	0.812127237	0.889978214	0.849272349
310	1	0	1	1	1	0.893835616	0.106164384	0.998722861	0.894736842	0.943874472	0.971685218	0.028314782	0.812127237	0.889978214	0.849272349
310	1	0	1	1	1	0.893835616	0.106164384	0.998722861	0.894736842	0.943874472	0.971685218	0.028314782	0.812127237	0.889978214	0.849272349
310	1	0	1	1	1	0.893835616	0.106164384	0.998722861	0.894736842	0.943874472	0.971685218	0.028314782	0.812127237	0.889978214	0.849272349
310	1	0	1	1	1	0.893835616	0.106164384	0.998722861	0.894736842	0.943874472	0.971685218	0.028314782	0.812127237	0.889978214	0.849272349
310	1	0	1	1	1	0.893835616	0.106164384	0.998722861	0.894736842	0.943874472	0.971685218	0.028314782	0.812127237	0.889978214	0.849272349
310	1	0	1	1	1	0.893835616	0.106164384	0.998722861	0.894736842	0.943874472	0.971685218	0.028314782	0.812127237	0.889978214	0.849272349
310	1	0	1	1	1	0.893835616	0.106164384	0.998722861	0.894736842	0.943874472	0.971685218	0.028314782	0.812127237	0.889978214	0.849272349
310	1	0	1	1	1	0.893835616	0.106164384	0.998722861	0.894736842	0.943874472	0.971685218	0.028314782	0.812127237	0.889978214	0.849272349
310	1	0	1	1	1	0.893835616	0.106164384	0.998722861	0.894736842	0.943874472	0.971685218	0.028314782	0.812127237	0.889978214	0.849272349
310	1	0	1	1	1	0.893835616	0.106164384	0.998722861	0.894736842	0.943874472	0.971685218	0.028314782	0.812127237	0.889978214	0.849272349
310	1	0	1	1	1	0.893835616	0.106164384	0.998722861	0.894736842	0.943874472	0.971685218	0.028314782	0.812127237	0.889978214	0.849272349
310	1	0	1	1	1	0.893835616	0.106164384	0.998722861	0.894736842	0.943874472	0.971685218	0.028314782	0.812127237	0.889978214	0.849272349
310	1	0	1	1	1	0.893835616	0.106164384	0.998722861	0.894736842	0.943874472	0.971685218	0.028314782	0.812127237	0.889978214	0.849272349
310	1	0	1	1	1	0.893835616	0.106164384	0.998722861	0.894736842	0.943874472	0.971685218	0.028314782	0.812127237	0.889978214	0.849272349
310	1	0	1	1	1	0.893835616	0.106164384	0.998722861	0.894736842	0.943874472	0.971685218	0.028314782	0.812127237	0.889978214	0.849272349
310	1	0	1	1	1	0.893835616	0.106164384	0.998722861	0.894736842	0.943874472	0.971685218	0.028314782	0.812127237	0.889978214	0.849272349
310	1	0	1	1	1	0.893835616	0.106164384	0.998722861	0.894736842	0.943874472	0.971685218	0.028314782	0.812127237	0.889978214	0.849272349
310	1	0	1	1	1	0.893835616	0.106164384	0.998722861	0.894736842	0.943874472	0.971685218	0.028314782	0.812127237	0.889978214	0.849272349
310	1	0	1	1	1	0.893835616	0.106164384	0.998722861	0.894736842	0.943874472	0.971685218	0.028314782	0.812127237	0.889978214	0.849272349
310	1	0	1	1	1	0.893835616	0.106164384	0.998722861	0.894736842	0.943874472	0.971685218	0.028314782	0.812127237	0.889978214	0.849272349
310	1	0	1	1	1	0.893835616	0.106164384	0.998722861	0.894736842	0.943874472	0.971685218	0.028314782	0.812127237	0.889978214	0.849272349
310	1	0	1	1	1	0.893835616	0.106164384	0.998722861	0.894736842	0.943874472	0.971685218	0.028314782	0.812127237	0.889978214	0.849272349
310	1	0	1	1	1	0.893835616	0.106164384	0.998722861	0.894736842	0.943874472	0.971685218	0.028314782	0.812127237	0.889978214	0.849272349
310	1	0	1	1	1	0.893835616	0.106164384	0.998722861	0.894736842	0.943874472	0.971685218	0.028314782	0.812127237	0.889978214	0.849272349
310	1	0	1	1	1	0.893835616	0.106164384	0.998722861	0.894736842	0.943874472	0.971685218	0.028314782	0.812127237	0.889978214	0.849272349
310	1	0	1	1	1	0.893835616	0.106164384	0.998722861	0.894736842	0.943874472	0.971685218	0.028314782	0.812127237	0.889978214	0.849272349
310	1	0	1	1	1	0.893835616	0.106164384	0.998722861	0.894736842	0.943874472	0.971685218	0.028314782	0.812127237	0.889978214	0.849272349
310	1	0	1	1	1	0.893835616	0.106164384	0.998722861	0.894736842	0.943874472	0.971685218	0.028314782	0.812127237	0.889978214	0.849272349
310	1	0	1	1	1	0.893835616	0.106164384	0.998722861	0.894736842	0.943874472	0.971685218	0.028314782	0.812127237	0.889978214	0.849272349
310	1	0	1	1	1	0.893835616	0.106164384	0.998722861	0.894736842	0.943874472	0.971685218	0.028314782	0.812127237	0.889978214	0.849272349
310	1	0	1	1	1	0.893835616	0.106164384	0.998722861	0.894736842	0.943874472	0.971685218	0.028314782	0.812127237	0.889978214	0.849272349
310	1	0	1	1	1	0.893835616	0.106164384	0.998722861	0.894736842	0.943874472	0.971685218	0.028314782	0.812127237	0.889978214	0.849272349
310	1	0	1	1	1	0.893835616	0.106164384	0.998722861	0.894736842	0.943874472	0.971685218	0.028314782	0.812127237	0.889978214	0.849272349
310	1	0	1	1	1	0.893835616	0.106164384	0.998722861	0.894736842	0.943874472	0.971685218	0.028314782	0.812127237	0.889978214	0.849272349
310	1	0	1	1	1	0.893835616	0.106164384	0.998722861	0.894736842	0.943874472	0.971685218	0.028314782	0.812127237	0.889978214	0.849272349
310	1	0	1	1	1	0.893835616	0.106164384	0.998722861	0.894736842	0.943874472	0.971685218	0.028314782	0.812127237	0.889978214	0.849272349
310	1	0	1	1	1	0.893835616	0.106164384	0.998722861	0.894736842	0.943874472	0.971685218	0.028314782	0.812127237	0.889978214	0.849272349
310	1	0	1	1	1	0.893835616	0.106164384	0.998722861	0.894736842	0.943874472	0.971685218	0.028314782	0.812127237	0.889978214	0.849272349
310	1	0	1	1	1	0.893835616	0.106164384	0.998722861	0.894736842	0.943874472	0.971685218	0.028314782	0.812127237	0.889978214	0.849272349
310	1	0	1	1	1	0.893835616	0.106164384	0.998722861	0.894736842	0.943874472	0.971685218	0.028314782	0.812127237	0.889978214	0.849272349
310	1	0	1	1	1	0.893835616	0.106164384	0.998722861	0.894736842	0.943874472	0.971685218	0.028314782	0.812127237	0.889978214	0.849272349
310	1	0	1	1	1	0.893835616	0.106164384	0.998722861	0.894736842	0.943874472	0.971685218	0.028314782	0.812127237	0.889978214	0.849272349
310	1	0	1	1	1	0.893835616	0.106164384	0.998722861	0.894736842	0.943874472	0.971685218	0.028314782	0.812127237	0.889978214	0.849272349
310	1	0	1	1	1	0.893835616	0.106164384	0.998722861	0.894736842	0.943874472	0.971685218	0.028314782	0.812127237	0.889978214	0.849272349
310	1	0	1	1	1	0.893835616	0.106164384	0.998722861	0.894736842	0.943874472	0.971685218	0.028314782	0.812127237	0.889978214	0.849272349
310	1	0	1	1	1	0.893835616	0.106164384	0.998722861	0.894736842	0.943874472	0.971685218	0.028314782	0.812127237	0.889978214	0.849272349
310	1	0	1	1	1	0.893835616	0.106164384	0.998722861	0.894736842	0.943874472	0.971685218	0.028314782	0.812127237	0.889978214	0.849272349
310	1	0	1	1	1	0.893835616	0.106164384	0.998722861	0.894736842	0.943874472	0.971685218	0.028314782	0.812127237	0.889978214	0.849272349
310	1	0	1	1	1	0.893835616	0.106164384	0.998722861	0.894736842	0.943874472	0.971685218	0.028314782	0.812127237	0.889978214	0.849272349
310	1	0	1	1	1	0.893835616	0.106164384	0.998722861	0.894736842	0.943874472	0.971685218	0.028314782	0.812127237	0.889978214	0.849272349
310	1	0	1	1	1	0.893835616	0.106164384	0.998722861	0.894736842	0.943874472	0.971685218	0.028314782	0.812127237	0.889978214	0.849272349
310	1	0	1	1	1	0.893835616	0.106164384	0.998722861	0.894736842	0.943874472	0.971685218	0.028314782	0.812127237	0.889978214	0.849272349
310	1	0	1	1	1	0.893835616	0.106164384	0.998722861	0.894736842	0.943874472	0.971685218	0.028314782	0.812127237	0.889978214	0.849272349
310	1	0	1	1	1	0.893835616	0.106164384	0.998722861	0.894736842	0.943874472	0.971685218	0.028314782	0.812127237	0.889978214	0.849272349
310	1	0	1	1	1	0.893835616	0.106164384	0.998722861	0.894736842	0.943874472	0.971685218	0.028314782	0.812127237	0.889978214	0.849272349
310	1	0	1	1	1	0.893835616	0.106164384	0.998722861	0.894736842	0.943874472	0.971685218	0.028314782	0.812127237	0.889978214	0.849272349
310	1	0	1	1	1	0.893835616	0.106164384	0.998722861	0.894736842	0.943874472	0.971685218	0.028314782	0.812127237	0.889978214	0.849272349
310	1	0	1	1	1	0.893835616	0.106164384	0.998722861	0.894736842	0.943874472	0.971685218	0.028314782	0.812127237	0.889978214	0.849272349
310	1	0	1	1	1	0.893835616	0.106164384	0.998722861	0.894736842	0.943874472	0.971685218	0.028314782	0.812127237	0.889978214	0.849272349
310	1	0	1	1	1	0.893835616	0.106164384	0.998722861	0.894736842	0.943874472	0.971685218	0.028314782	0.812127237	0.889978214	0.849272349
310	1	0	1	1	1	0.893835616	0.106164384	0.998722861	0.894736842	0.943874472	0.971685218	0.028314782	0.812127237	0.889978214	0.849272349
310	1	0	1	1	1	0.893835616	0.106164384	0.998722861	0.894736842	0.943874472	0.971685218	0.028314782	0.812127237	0.889978214	0.849272349
310	1	0	1	1	1	0.893835616	0.106164384	0.998722861	0.894736842	0.943874472	0.971685218	0.028314782	0.812127237	0.889978214	0.849272349
310	1	0	1	1	1	0.893835616	0.106164384	0.998722861	0.894736842	0.943874472	0.971685218	0.028314782	0.812127237	0.889978214	0.849272349
310	1	0	1	1	1	0.893835616	0.106164384	0.998722861	0.894736842	0.943874472	0.971685218	0.028314782	0.812127237	0.889978214	0.849272349
310	1	0	1	1	1	0.893835616	0.106164384	0.998722861	0.894736842	0.943874472	0.971685218	0.028314782	0.812127237	0.889978214	0.849272349
310	1	0	1	1	1	0.893835616	0.106164384	0.998722861	0.894736842	0.943874472	0.971685218	0.028314782	0.812127237	0.889978214	0.849272349
310	1	0	1	1	1	0.893835616	0.106164384	0.998722861	0.894736842	0.943874472	0.971685218	0.028314782	0.812127237	0.889978214	0.849272349
310	1	0	1	1	1	0.893835616	0.106164384	0.998722861	0.894736842	0.943874472	0.971685218	0.028314782	0.812127237	0.889978214	0.849272349
310	1	0	1	1	1	0.893835616	0.106164384	0.998722861	0.894736842	0.943874472	0.971685218	0.028314782	0.812127237	0.889978214	0.849272349
310	1	0	1	1	1	0.893835616	0.106164384	0.998722861	0.894736842	0.943874472	0.971685218	0.028314782	0.812127237	0.889978214	0.849272349
310	1	0	1	1	1	0.893835616	0.106164384	0.998722861	0.894736842	0.943874472	0.971685218	0.028314782	0.812127237	0.889978214	0.849272349
310	1	0	1	1	1	0.893835616	0.106164384	0.998722861	0.894736842	0.943874472	0.971685218	0.028314782	0.812127237	0.889978214	0.849272349
310	1	0	1	1	1	0.893835616	0.106164384	0.998722861	0.894736842	0.943874472	0.971685218	0.028314782	0.812127237	0.889978214	0.849272349
310	1	0	1	1	1	0.893835616	0.106164384	0.998722861	0.894736842	0.943874472	0.971685218	0.028314782	0.812127237	0.889978214	0.849272349
310	1	0	1	1	1	0.893835616	0.106164384	0.998722861	0.894736842	0.943874472	0.971685218	0.028314782	0.812127237	0.889978214	0.849272349
310	1	0	1	1	1	0.893835616	0.106164384	0.998722861	0.894736842	0.943874472	0.971685218	0.028314782	0.812127237	0.889978214	0.849272349
309	1	0	1	1	1	0.893592677	0.106407323	0.99871959	0.894495413	0.943738657	0.9719836	0.0280164	0.814925373	0.890217391	0.850909091
309	1	0	1	1	1	0.893592677	0.106407323	0.99871959	0.894495413	0.943738657	0.9719836	0.0280164	0.814925373	0.890217391	0.850909091
309	1	0	1	1	1	0.893592677	0.106407323	0.99871959	0.894495413	0.943738657	0.9719836	0.0280164	0.814925373	0.890217391	0.850909091
309	1	0	1	1	1	0.893592677	0.106407323	0.99871959	0.894495413	0.943738657	0.9719836	0.0280164	0.814925373	0.890217391	0.850909091
309	1	0	1	1	1	0.893592677	0.106407323	0.99871959	0.894495413	0.943738657	0.9719836	0.0280164	0.814925373	0.890217391	0.850909091
309	1	0	1	1	1	0.893592677	0.106407323	0.99871959	0.894495413	0.943738657	0.9719836	0.0280164	0.814925373	0.890217391	0.850909091
309	1	0	1	1	1	0.893592677	0.106407323	0.99871959	0.894495413	0.943738657	0.9719836	0.0280164	0.814925373	0.890217391	0.850909091
309	1	0	1	1	1	0.893592677	0.106407323	0.99871959	0.894495413	0.943738657	0.9719836	0.0280164	0.814925373	0.890217391	0.850909091
309	1	0	1	1	1	0.893592677	0.106407323	0.99871959	0.894495413	0.943738657	0.9719836	0.0280164	0.814925373	0.890217391	0.850909091
309	1	0	1	1	1	0.893592677	0.106407323	0.99871959	0.894495413	0.943738657	0.9719836	0.0280164	0.814925373	0.890217391	0.850909091
309	1	0	1	1	1	0.893592677	0.106407323	0.99871959	0.894495413	0.943738657	0.9719836	0.0280164	0.814925373	0.890217391	0.850909091
309	1	0	1	1	1	0.893592677	0.106407323	0.99871959	0.894495413	0.943738657	0.9719836	0.0280164	0.814925373	0.890217391	0.850909091
309	1	0	1	1	1	0.893592677	0.106407323	0.99871959	0.894495413	0.943738657	0.9719836	0.0280164	0.814925373	0.890217391	0.850909091
309	1	0	1	1	1	0.893592677	0.106407323	0.99871959	0.894495413	0.943738657	0.9719836	0.0280164	0.814925373	0.890217391	0.850909091
309	1	0	1	1	1	0.893592677	0.106407323	0.99871959	0.894495413	0.943738657	0.9719836	0.0280164	0.814925373	0.890217391	0.850909091
309	1	0	1	1	1	0.893592677	0.106407323	0.99871959	0.894495413	0.943738657	0.9719836	0.0280164	0.814925373	0.890217391	0.850909091
309	1	0	1	1	1	0.893592677	0.106407323	0.99871959	0.894495413	0.943738657	0.9719836	0.0280164	0.814925373	0.890217391	0.850909091
309	1	0	1	1	1	0.893592677	0.106407323	0.99871959	0.894495413	0.943738657	0.9719836	0.0280164	0.814925373	0.890217391	0.850909091
309	1	0	1	1	1	0.893592677	0.106407323	0.99871959	0.894495413	0.943738657	0.9719836	0.0280164	0.814925373	0.890217391	0.850909091
309	1	0	1	1	1	0.893592677	0.106407323	0.99871959	0.894495413	0.943738657	0.9719836	0.0280164	0.814925373	0.890217391	0.850909091
309	1	0	1	1	1	0.893592677	0.106407323	0.99871959	0.894495413	0.943738657	0.9719836	0.0280164	0.814925373	0.890217391	0.850909091
309	1	0	1	1	1	0.893592677	0.106407323	0.99871959	0.894495413	0.943738657	0.9719836	0.0280164	0.814925373	0.890217391	0.850909091
309	1	0	1	1	1	0.893592677	0.106407323	0.99871959	0.894495413	0.943738657	0.9719836	0.0280164	0.814925373	0.890217391	0.850909091
309	1	0	1	1	1	0.893592677	0.106407323	0.99871959	0.894495413	0.943738657	0.9719836	0.0280164	0.814925373	0.890217391	0.850909091
309	1	0	1	1	1	0.893592677	0.106407323	0.99871959	0.894495413	0.943738657	0.9719836	0.0280164	0.814925373	0.890217391	0.850909091
309	1	0	1	1	1	0.893592677	0.106407323	0.99871959	0.894495413	0.943738657	0.9719836	0.0280164	0.814925373	0.890217391	0.850909091
309	1	0	1	1	1	0.893592677	0.106407323	0.99871959	0.894495413	0.943738657	0.9719836	0.0280164	0.814925373	0.890217391	0.850909091
309	1	0	1	1	1	0.893592677	0.106407323	0.99871959	0.894495413	0.943738657	0.9719836	0.0280164	0.814925373	0.890217391	0.850909091
309	1	0	1	1	1	0.893592677	0.106407323	0.99871959	0.894495413	0.943738657	0.9719836	0.0280164	0.814925373	0.890217391	0.850909091
309	1	0	1	1	1	0.893592677	0.106407323	0.99871959	0.894495413	0.943738657	0.9719836	0.0280164	0.814925373	0.890217391	0.850909091
309	1	0	1	1	1	0.893592677	0.106407323	0.99871959	0.894495413	0.943738657	0.9719836	0.0280164	0.814925373	0.890217391	0.850909091
309	1	0	1	1	1	0.893592677	0.106407323	0.99871959	0.894495413	0.943738657	0.9719836	0.0280164	0.814925373	0.890217391	0.850909091
309	1	0	1	1	1	0.893592677	0.106407323	0.99871959	0.894495413	0.943738657	0.9719836	0.0280164	0.814925373	0.890217391	0.850909091
309	1	0	1	1	1	0.893592677	0.106407323	0.99871959	0.894495413	0.943738657	0.9719836	0.0280164	0.814925373	0.890217391	0.850909091
309	1	0	1	1	1	0.893592677	0.106407323	0.99871959	0.894495413	0.943738657	0.9719836	0.0280164	0.814925373	0.890217391	0.850909091
309	1	0	1	1	1	0.893592677	0.106407323	0.99871959	0.894495413	0.943738657	0.9719836	0.0280164	0.814925373	0.890217391	0.850909091
309	1	0	1	1	1	0.893592677	0.106407323	0.99871959	0.894495413	0.943738657	0.9719836	0.0280164	0.814925373	0.890217391	0.850909091
309	1	0	1	1	1	0.893592677	0.106407323	0.99871959	0.894495413	0.943738657	0.9719836	0.0280164	0.814925373	0.890217391	0.850909091
309	1	0	1	1	1	0.893592677	0.106407323	0.99871959	0.894495413	0.943738657	0.9719836	0.0280164	0.814925373	0.890217391	0.850909091
309	1	0	1	1	1	0.893592677	0.106407323	0.99871959	0.894495413	0.943738657	0.9719836	0.0280164	0.814925373	0.890217391	0.850909091
309	1	0	1	1	1	0.893592677	0.106407323	0.99871959	0.894495413	0.943738657	0.9719836	0.0280164	0.814925373	0.890217391	0.850909091
309	1	0	1	1	1	0.893592677	0.106407323	0.99871959	0.894495413	0.943738657	0.9719836	0.0280164	0.814925373	0.890217391	0.850909091
309	1	0	1	1	1	0.893592677	0.106407323	0.99871959	0.894495413	0.943738657	0.9719836	0.0280164	0.814925373	0.890217391	0.850909091
309	1	0	1	1	1	0.893592677	0.106407323	0.99871959	0.894495413	0.943738657	0.9719836	0.0280164	0.814925373	0.890217391	0.850909091
309	1	0	1	1	1	0.893592677	0.106407323	0.99871959	0.894495413	0.943738657	0.9719836	0.0280164	0.814925373	0.890217391	0.850909091
309	1	0	1	1	1	0.893592677	0.106407323	0.99871959	0.894495413	0.943738657	0.9719836	0.0280164	0.814925373	0.890217391	0.850909091
309	1	0	1	1	1	0.893592677	0.106407323	0.99871959	0.894495413	0.943738657	0.9719836	0.0280164	0.814925373	0.890217391	0.850909091
309	1	0	1	1	1	0.893592677	0.106407323	0.99871959	0.894495413	0.943738657	0.9719836	0.0280164	0.814925373	0.890217391	0.850909091
309	1	0	1	1	1	0.893592677	0.106407323	0.99871959	0.894495413	0.943738657	0.9719836	0.0280164	0.814925373	0.890217391	0.850909091
309	1	0	1	1	1	0.893592677	0.106407323	0.99871959	0.894495413	0.943738657	0.9719836	0.0280164	0.814925373	0.890217391	0.850909091
309	1	0	1	1	1	0.893592677	0.106407323	0.99871959	0.894495413	0.943738657	0.9719836	0.0280164	0.814925373	0.890217391	0.850909091
309	1	0	1	1	1	0.893592677	0.106407323	0.99871959	0.894495413	0.943738657	0.9719836	0.0280164	0.814925373	0.890217391	0.850909091
309	1	0	1	1	1	0.893592677	0.106407323	0.99871959	0.894495413	0.943738657	0.9719836	0.0280164	0.814925373	0.890217391	0.850909091
309	1	0	1	1	1	0.893592677	0.106407323	0.99871959	0.894495413	0.943738657	0.9719836	0.0280164	0.814925373	0.890217391	0.850909091
309	1	0	1	1	1	0.893592677	0.106407323	0.99871959	0.894495413	0.943738657	0.9719836	0.0280164	0.814925373	0.890217391	0.850909091
309	1	0	1	1	1	0.893592677	0.106407323	0.99871959	0.894495413	0.943738657	0.9719836	0.0280164	0.814925373	0.890217391	0.850909091
309	1	0	1	1	1	0.893592677	0.106407323	0.99871959	0.894495413	0.943738657	0.9719836	0.0280164	0.814925373	0.890217391	0.850909091
309	1	0	1	1	1	0.893592677	0.106407323	0.99871959	0.894495413	0.943738657	0.9719836	0.0280164	0.814925373	0.890217391	0.850909091
309	1	0	1	1	1	0.893592677	0.106407323	0.99871959	0.894495413	0.943738657	0.9719836	0.0280164	0.814925373	0.890217391	0.850909091
309	1	0	1	1	1	0.893592677	0.106407323	0.99871959	0.894495413	0.943738657	0.9719836	0.0280164	0.814925373	0.890217391	0.850909091
309	1	0	1	1	1	0.893592677	0.106407323	0.99871959	0.894495413	0.943738657	0.9719836	0.0280164	0.814925373	0.890217391	0.850909091
309	1	0	1	1	1	0.893592677	0.106407323	0.99871959	0.894495413	0.943738657	0.9719836	0.0280164	0.814925373	0.890217391	0.850909091
309	1	0	1	1	1	0.893592677	0.106407323	0.99871959	0.894495413	0.943738657	0.9719836	0.0280164	0.814925373	0.890217391	0.850909091
309	1	0	1	1	1	0.893592677	0.106407323	0.99871959	0.894495413	0.943738657	0.9719836	0.0280164	0.814925373	0.890217391	0.850909091
309	1	0	1	1	1	0.893592677	0.106407323	0.99871959	0.894495413	0.943738657	0.9719836	0.0280164	0.814925373	0.890217391	0.850909091
309	1	0	1	1	1	0.893592677	0.106407323	0.99871959	0.894495413	0.943738657	0.9719836	0.0280164	0.814925373	0.890217391	0.850909091
309	1	0	1	1	1	0.893592677	0.106407323	0.99871959	0.894495413	0.943738657	0.9719836	0.0280164	0.814925373	0.890217391	0.850909091
309	1	0	1	1	1	0.893592677	0.106407323	0.99871959	0.894495413	0.943738657	0.9719836	0.0280164	0.814925373	0.890217391	0.850909091
309	1	0	1	1	1	0.893592677	0.106407323	0.99871959	0.894495413	0.943738657	0.9719836	0.0280164	0.814925373	0.890217391	0.850909091
309	1	0	1	1	1	0.893592677	0.106407323	0.99871959	0.894495413	0.943738657	0.9719836	0.0280164	0.814925373	0.890217391	0.850909091
309	1	0	1	1	1	0.893592677	0.106407323	0.99871959	0.894495413	0.943738657	0.9719836	0.0280164	0.814925373	0.890217391	0.850909091
309	1	0	1	1	1	0.893592677	0.106407323	0.99871959	0.894495413	0.943738657	0.9719836	0.0280164	0.814925373	0.890217391	0.850909091
309	1	0	1	1	1	0.893592677	0.106407323	0.99871959	0.894495413	0.943738657	0.9719836	0.0280164	0.814925373	0.890217391	0.850909091
309	1	0	1	1	1	0.893592677	0.106407323	0.99871959	0.894495413	0.943738657	0.9719836	0.0280164	0.814925373	0.890217391	0.850909091
309	1	0	1	1	1	0.893592677	0.106407323	0.99871959	0.894495413	0.943738657	0.9719836	0.0280164	0.814925373	0.890217391	0.850909091
309	1	0	1	1	1	0.893592677	0.106407323	0.99871959	0.894495413	0.943738657	0.9719836	0.0280164	0.814925373	0.890217391	0.850909091
309	1	0	1	1	1	0.893592677	0.106407323	0.99871959	0.894495413	0.943738657	0.9719836	0.0280164	0.814925373	0.890217391	0.850909091
309	1	0	1	1	1	0.893592677	0.106407323	0.99871959	0.894495413	0.943738657	0.9719836	0.0280164	0.814925373	0.890217391	0.850909091
309	1	0	1	1	1	0.893592677	0.106407323	0.99871959	0.894495413	0.943738657	0.9719836	0.0280164	0.814925373	0.890217391	0.850909091
309	1	0	1	1	1	0.893592677	0.106407323	0.99871959	0.894495413	0.943738657	0.9719836	0.0280164	0.814925373	0.890217391	0.850909091
309	1	0	1	1	1	0.893592677	0.106407323	0.99871959	0.894495413	0.943738657	0.9719836	0.0280164	0.814925373	0.890217391	0.850909091
309	1	0	1	1	1	0.893592677	0.106407323	0.99871959	0.894495413	0.943738657	0.9719836	0.0280164	0.814925373	0.890217391	0.850909091
309	1	0	1	1	1	0.893592677	0.106407323	0.99871959	0.894495413	0.943738657	0.9719836	0.0280164	0.814925373	0.890217391	0.850909091
309	1	0	1	1	1	0.893592677	0.106407323	0.99871959	0.894495413	0.943738657	0.9719836	0.0280164	0.814925373	0.890217391	0.850909091
309	1	0	1	1	1	0.893592677	0.106407323	0.99871959	0.894495413	0.943738657	0.9719836	0.0280164	0.814925373	0.890217391	0.850909091
309	1	0	1	1	1	0.893592677	0.106407323	0.99871959	0.894495413	0.943738657	0.9719836	0.0280164	0.814925373	0.890217391	0.850909091
309	1	0	1	1	1	0.893592677	0.106407323	0.99871959	0.894495413	0.943738657	0.9719836	0.0280164	0.814925373	0.890217391	0.850909091
309	1	0	1	1	1	0.893592677	0.106407323	0.99871959	0.894495413	0.943738657	0.9719836	0.0280164	0.814925373	0.890217391	0.850909091
309	1	0	1	1	1	0.893592677	0.106407323	0.99871959	0.894495413	0.943738657	0.9719836	0.0280164	0.814925373	0.890217391	0.850909091
309	1	0	1	1	1	0.893592677	0.106407323	0.99871959	0.894495413	0.943738657	0.9719836	0.0280164	0.814925373	0.890217391	0.850909091
309	1	0	1	1	1	0.893592677	0.106407323	0.99871959	0.894495413	0.943738657	0.9719836	0.0280164	0.814925373	0.890217391	0.850909091
309	1	0	1	1	1	0.893592677	0.106407323	0.99871959	0.894495413	0.943738657	0.9719836	0.0280164	0.814925373	0.890217391	0.850909091
309	1	0	1	1	1	0.893592677	0.106407323	0.99871959	0.894495413	0.943738657	0.9719836	0.0280164	0.814925373	0.890217391	0.850909091
309	1	0	1	1	1	0.893592677	0.106407323	0.99871959	0.894495413	0.943738657	0.9719836	0.0280164	0.814925373	0.890217391	0.850909091
309	1	0	1	1	1	0.893592677	0.106407323	0.99871959	0.894495413	0.943738657	0.9719836	0.0280164	0.814925373	0.890217391	0.850909091
309	1	0	1	1	1	0.893592677	0.106407323	0.99871959	0.894495413	0.943738657	0.9719836	0.0280164	0.814925373	0.890217391	0.850909091
309	1	0	1	1	1	0.893592677	0.106407323	0.99871959	0.894495413	0.943738657	0.9719836	0.0280164	0.814925373	0.890217391	0.850909091
309	1	0	1	1	1	0.893592677	0.106407323	0.99871959	0.894495413	0.943738657	0.9719836	0.0280164	0.814925373	0.890217391	0.850909091
309	1	0	1	1	1	0.893592677	0.106407323	0.99871959	0.894495413	0.943738657	0.9719836	0.0280164	0.814925373	0.890217391	0.850909091
309	1	0	1	1	1	0.893592677	0.106407323	0.99871959	0.894495413	0.943738657	0.9719836	0.0280164	0.814925373	0.890217391	0.850909091
308	1	0	1	1	1	0.89347079	0.10652921	0.998717949	0.894374282	0.943670503	0.971986335	0.028013665	0.815109344	0.890336591	0.85106383
308	1	0	1	1	1	0.89347079	0.10652921	0.998717949	0.894374282	0.943670503	0.971986335	0.028013665	0.815109344	0.890336591	0.85106383
308	1	0	1	1	1	0.89347079	0.10652921	0.998717949	0.894374282	0.943670503	0.971986335	0.028013665	0.815109344	0.890336591	0.85106383
308	1	0	1	1	1	0.89347079	0.10652921	0.998717949	0.894374282	0.943670503	0.971986335	0.028013665	0.815109344	0.890336591	0.85106383
308	1	0	1	1	1	0.89347079	0.10652921	0.998717949	0.894374282	0.943670503	0.971986335	0.028013665	0.815109344	0.890336591	0.85106383
308	1	0	1	1	1	0.89347079	0.10652921	0.998717949	0.894374282	0.943670503	0.971986335	0.028013665	0.815109344	0.890336591	0.85106383
308	1	0	1	1	1	0.89347079	0.10652921	0.998717949	0.894374282	0.943670503	0.971986335	0.028013665	0.815109344	0.890336591	0.85106383
308	1	0	1	1	1	0.89347079	0.10652921	0.998717949	0.894374282	0.943670503	0.971986335	0.028013665	0.815109344	0.890336591	0.85106383
308	1	0	1	1	1	0.89347079	0.10652921	0.998717949	0.894374282	0.943670503	0.971986335	0.028013665	0.815109344	0.890336591	0.85106383
308	1	0	1	1	1	0.89347079	0.10652921	0.998717949	0.894374282	0.943670503	0.971986335	0.028013665	0.815109344	0.890336591	0.85106383
308	1	0	1	1	1	0.89347079	0.10652921	0.998717949	0.894374282	0.943670503	0.971986335	0.028013665	0.815109344	0.890336591	0.85106383
308	1	0	1	1	1	0.89347079	0.10652921	0.998717949	0.894374282	0.943670503	0.971986335	0.028013665	0.815109344	0.890336591	0.85106383
308	1	0	1	1	1	0.89347079	0.10652921	0.998717949	0.894374282	0.943670503	0.971986335	0.028013665	0.815109344	0.890336591	0.85106383
308	1	0	1	1	1	0.89347079	0.10652921	0.998717949	0.894374282	0.943670503	0.971986335	0.028013665	0.815109344	0.890336591	0.85106383
308	1	0	1	1	1	0.89347079	0.10652921	0.998717949	0.894374282	0.943670503	0.971986335	0.028013665	0.815109344	0.890336591	0.85106383
308	1	0	1	1	1	0.89347079	0.10652921	0.998717949	0.894374282	0.943670503	0.971986335	0.028013665	0.815109344	0.890336591	0.85106383
308	1	0	1	1	1	0.89347079	0.10652921	0.998717949	0.894374282	0.943670503	0.971986335	0.028013665	0.815109344	0.890336591	0.85106383
308	1	0	1	1	1	0.89347079	0.10652921	0.998717949	0.894374282	0.943670503	0.971986335	0.028013665	0.815109344	0.890336591	0.85106383
308	1	0	1	1	1	0.89347079	0.10652921	0.998717949	0.894374282	0.943670503	0.971986335	0.028013665	0.815109344	0.890336591	0.85106383
308	1	0	1	1	1	0.89347079	0.10652921	0.998717949	0.894374282	0.943670503	0.971986335	0.028013665	0.815109344	0.890336591	0.85106383
308	1	0	1	1	1	0.89347079	0.10652921	0.998717949	0.894374282	0.943670503	0.971986335	0.028013665	0.815109344	0.890336591	0.85106383
308	1	0	1	1	1	0.89347079	0.10652921	0.998717949	0.894374282	0.943670503	0.971986335	0.028013665	0.815109344	0.890336591	0.85106383
308	1	0	1	1	1	0.89347079	0.10652921	0.998717949	0.894374282	0.943670503	0.971986335	0.028013665	0.815109344	0.890336591	0.85106383
308	1	0	1	1	1	0.89347079	0.10652921	0.998717949	0.894374282	0.943670503	0.971986335	0.028013665	0.815109344	0.890336591	0.85106383
308	1	0	1	1	1	0.89347079	0.10652921	0.998717949	0.894374282	0.943670503	0.971986335	0.028013665	0.815109344	0.890336591	0.85106383
308	1	0	1	1	1	0.89347079	0.10652921	0.998717949	0.894374282	0.943670503	0.971986335	0.028013665	0.815109344	0.890336591	0.85106383
308	1	0	1	1	1	0.89347079	0.10652921	0.998717949	0.894374282	0.943670503	0.971986335	0.028013665	0.815109344	0.890336591	0.85106383
308	1	0	1	1	1	0.89347079	0.10652921	0.998717949	0.894374282	0.943670503	0.971986335	0.028013665	0.815109344	0.890336591	0.85106383
308	1	0	1	1	1	0.89347079	0.10652921	0.998717949	0.894374282	0.943670503	0.971986335	0.028013665	0.815109344	0.890336591	0.85106383
308	1	0	1	1	1	0.89347079	0.10652921	0.998717949	0.894374282	0.943670503	0.971986335	0.028013665	0.815109344	0.890336591	0.85106383
308	1	0	1	1	1	0.89347079	0.10652921	0.998717949	0.894374282	0.943670503	0.971986335	0.028013665	0.815109344	0.890336591	0.85106383
308	1	0	1	1	1	0.89347079	0.10652921	0.998717949	0.894374282	0.943670503	0.971986335	0.028013665	0.815109344	0.890336591	0.85106383
308	1	0	1	1	1	0.89347079	0.10652921	0.998717949	0.894374282	0.943670503	0.971986335	0.028013665	0.815109344	0.890336591	0.85106383
308	1	0	1	1	1	0.89347079	0.10652921	0.998717949	0.894374282	0.943670503	0.971986335	0.028013665	0.815109344	0.890336591	0.85106383
308	1	0	1	1	1	0.89347079	0.10652921	0.998717949	0.894374282	0.943670503	0.971986335	0.028013665	0.815109344	0.890336591	0.85106383
308	1	0	1	1	1	0.89347079	0.10652921	0.998717949	0.894374282	0.943670503	0.971986335	0.028013665	0.815109344	0.890336591	0.85106383
308	1	0	1	1	1	0.89347079	0.10652921	0.998717949	0.894374282	0.943670503	0.971986335	0.028013665	0.815109344	0.890336591	0.85106383
308	1	0	1	1	1	0.89347079	0.10652921	0.998717949	0.894374282	0.943670503	0.971986335	0.028013665	0.815109344	0.890336591	0.85106383
308	1	0	1	1	1	0.89347079	0.10652921	0.998717949	0.894374282	0.943670503	0.971986335	0.028013665	0.815109344	0.890336591	0.85106383
308	1	0	1	1	1	0.89347079	0.10652921	0.998717949	0.894374282	0.943670503	0.971986335	0.028013665	0.815109344	0.890336591	0.85106383
308	1	0	1	1	1	0.89347079	0.10652921	0.998717949	0.894374282	0.943670503	0.971986335	0.028013665	0.815109344	0.890336591	0.85106383
308	1	0	1	1	1	0.89347079	0.10652921	0.998717949	0.894374282	0.943670503	0.971986335	0.028013665	0.815109344	0.890336591	0.85106383
308	1	0	1	1	1	0.89347079	0.10652921	0.998717949	0.894374282	0.943670503	0.971986335	0.028013665	0.815109344	0.890336591	0.85106383
308	1	0	1	1	1	0.89347079	0.10652921	0.998717949	0.894374282	0.943670503	0.971986335	0.028013665	0.815109344	0.890336591	0.85106383
308	1	0	1	1	1	0.89347079	0.10652921	0.998717949	0.894374282	0.943670503	0.971986335	0.028013665	0.815109344	0.890336591	0.85106383
308	1	0	1	1	1	0.89347079	0.10652921	0.998717949	0.894374282	0.943670503	0.971986335	0.028013665	0.815109344	0.890336591	0.85106383
308	1	0	1	1	1	0.89347079	0.10652921	0.998717949	0.894374282	0.943670503	0.971986335	0.028013665	0.815109344	0.890336591	0.85106383
308	1	0	1	1	1	0.89347079	0.10652921	0.998717949	0.894374282	0.943670503	0.971986335	0.028013665	0.815109344	0.890336591	0.85106383
308	1	0	1	1	1	0.89347079	0.10652921	0.998717949	0.894374282	0.943670503	0.971986335	0.028013665	0.815109344	0.890336591	0.85106383
308	1	0	1	1	1	0.89347079	0.10652921	0.998717949	0.894374282	0.943670503	0.971986335	0.028013665	0.815109344	0.890336591	0.85106383
308	1	0	1	1	1	0.89347079	0.10652921	0.998717949	0.894374282	0.943670503	0.971986335	0.028013665	0.815109344	0.890336591	0.85106383
308	1	0	1	1	1	0.89347079	0.10652921	0.998717949	0.894374282	0.943670503	0.971986335	0.028013665	0.815109344	0.890336591	0.85106383
308	1	0	1	1	1	0.89347079	0.10652921	0.998717949	0.894374282	0.943670503	0.971986335	0.028013665	0.815109344	0.890336591	0.85106383
308	1	0	1	1	1	0.89347079	0.10652921	0.998717949	0.894374282	0.943670503	0.971986335	0.028013665	0.815109344	0.890336591	0.85106383
308	1	0	1	1	1	0.89347079	0.10652921	0.998717949	0.894374282	0.943670503	0.971986335	0.028013665	0.815109344	0.890336591	0.85106383
308	1	0	1	1	1	0.89347079	0.10652921	0.998717949	0.894374282	0.943670503	0.971986335	0.028013665	0.815109344	0.890336591	0.85106383
308	1	0	1	1	1	0.89347079	0.10652921	0.998717949	0.894374282	0.943670503	0.971986335	0.028013665	0.815109344	0.890336591	0.85106383
308	1	0	1	1	1	0.89347079	0.10652921	0.998717949	0.894374282	0.943670503	0.971986335	0.028013665	0.815109344	0.890336591	0.85106383
308	1	0	1	1	1	0.89347079	0.10652921	0.998717949	0.894374282	0.943670503	0.971986335	0.028013665	0.815109344	0.890336591	0.85106383
308	1	0	1	1	1	0.89347079	0.10652921	0.998717949	0.894374282	0.943670503	0.971986335	0.028013665	0.815109344	0.890336591	0.85106383
308	1	0	1	1	1	0.89347079	0.10652921	0.998717949	0.894374282	0.943670503	0.971986335	0.028013665	0.815109344	0.890336591	0.85106383
308	1	0	1	1	1	0.89347079	0.10652921	0.998717949	0.894374282	0.943670503	0.971986335	0.028013665	0.815109344	0.890336591	0.85106383
308	1	0	1	1	1	0.89347079	0.10652921	0.998717949	0.894374282	0.943670503	0.971986335	0.028013665	0.815109344	0.890336591	0.85106383
308	1	0	1	1	1	0.89347079	0.10652921	0.998717949	0.894374282	0.943670503	0.971986335	0.028013665	0.815109344	0.890336591	0.85106383
308	1	0	1	1	1	0.89347079	0.10652921	0.998717949	0.894374282	0.943670503	0.971986335	0.028013665	0.815109344	0.890336591	0.85106383
308	1	0	1	1	1	0.89347079	0.10652921	0.998717949	0.894374282	0.943670503	0.971986335	0.028013665	0.815109344	0.890336591	0.85106383
308	1	0	1	1	1	0.89347079	0.10652921	0.998717949	0.894374282	0.943670503	0.971986335	0.028013665	0.815109344	0.890336591	0.85106383
308	1	0	1	1	1	0.89347079	0.10652921	0.998717949	0.894374282	0.943670503	0.971986335	0.028013665	0.815109344	0.890336591	0.85106383
308	1	0	1	1	1	0.89347079	0.10652921	0.998717949	0.894374282	0.943670503	0.971986335	0.028013665	0.815109344	0.890336591	0.85106383
308	1	0	1	1	1	0.89347079	0.10652921	0.998717949	0.894374282	0.943670503	0.971986335	0.028013665	0.815109344	0.890336591	0.85106383
308	1	0	1	1	1	0.89347079	0.10652921	0.998717949	0.894374282	0.943670503	0.971986335	0.028013665	0.815109344	0.890336591	0.85106383
308	1	0	1	1	1	0.89347079	0.10652921	0.998717949	0.894374282	0.943670503	0.971986335	0.028013665	0.815109344	0.890336591	0.85106383
308	1	0	1	1	1	0.89347079	0.10652921	0.998717949	0.894374282	0.943670503	0.971986335	0.028013665	0.815109344	0.890336591	0.85106383
308	1	0	1	1	1	0.89347079	0.10652921	0.998717949	0.894374282	0.943670503	0.971986335	0.028013665	0.815109344	0.890336591	0.85106383
308	1	0	1	1	1	0.89347079	0.10652921	0.998717949	0.894374282	0.943670503	0.971986335	0.028013665	0.815109344	0.890336591	0.85106383
308	1	0	1	1	1	0.89347079	0.10652921	0.998717949	0.894374282	0.943670503	0.971986335	0.028013665	0.815109344	0.890336591	0.85106383
308	1	0	1	1	1	0.89347079	0.10652921	0.998717949	0.894374282	0.943670503	0.971986335	0.028013665	0.815109344	0.890336591	0.85106383
308	1	0	1	1	1	0.89347079	0.10652921	0.998717949	0.894374282	0.943670503	0.971986335	0.028013665	0.815109344	0.890336591	0.85106383
308	1	0	1	1	1	0.89347079	0.10652921	0.998717949	0.894374282	0.943670503	0.971986335	0.028013665	0.815109344	0.890336591	0.85106383
308	1	0	1	1	1	0.89347079	0.10652921	0.998717949	0.894374282	0.943670503	0.971986335	0.028013665	0.815109344	0.890336591	0.85106383
308	1	0	1	1	1	0.89347079	0.10652921	0.998717949	0.894374282	0.943670503	0.971986335	0.028013665	0.815109344	0.890336591	0.85106383
308	1	0	1	1	1	0.89347079	0.10652921	0.998717949	0.894374282	0.943670503	0.971986335	0.028013665	0.815109344	0.890336591	0.85106383
308	1	0	1	1	1	0.89347079	0.10652921	0.998717949	0.894374282	0.943670503	0.971986335	0.028013665	0.815109344	0.890336591	0.85106383
308	1	0	1	1	1	0.89347079	0.10652921	0.998717949	0.894374282	0.943670503	0.971986335	0.028013665	0.815109344	0.890336591	0.85106383
308	1	0	1	1	1	0.89347079	0.10652921	0.998717949	0.894374282	0.943670503	0.971986335	0.028013665	0.815109344	0.890336591	0.85106383
308	1	0	1	1	1	0.89347079	0.10652921	0.998717949	0.894374282	0.943670503	0.971986335	0.028013665	0.815109344	0.890336591	0.85106383
308	1	0	1	1	1	0.89347079	0.10652921	0.998717949	0.894374282	0.943670503	0.971986335	0.028013665	0.815109344	0.890336591	0.85106383
308	1	0	1	1	1	0.89347079	0.10652921	0.998717949	0.894374282	0.943670503	0.971986335	0.028013665	0.815109344	0.890336591	0.85106383
308	1	0	1	1	1	0.89347079	0.10652921	0.998717949	0.894374282	0.943670503	0.971986335	0.028013665	0.815109344	0.890336591	0.85106383
308	1	0	1	1	1	0.89347079	0.10652921	0.998717949	0.894374282	0.943670503	0.971986335	0.028013665	0.815109344	0.890336591	0.85106383
308	1	0	1	1	1	0.89347079	0.10652921	0.998717949	0.894374282	0.943670503	0.971986335	0.028013665	0.815109344	0.890336591	0.85106383
308	1	0	1	1	1	0.89347079	0.10652921	0.998717949	0.894374282	0.943670503	0.971986335	0.028013665	0.815109344	0.890336591	0.85106383
308	1	0	1	1	1	0.89347079	0.10652921	0.998717949	0.894374282	0.943670503	0.971986335	0.028013665	0.815109344	0.890336591	0.85106383
308	1	0	1	1	1	0.89347079	0.10652921	0.998717949	0.894374282	0.943670503	0.971986335	0.028013665	0.815109344	0.890336591	0.85106383
308	1	0	1	1	1	0.89347079	0.10652921	0.998717949	0.894374282	0.943670503	0.971986335	0.028013665	0.815109344	0.890336591	0.85106383
308	1	0	1	1	1	0.89347079	0.10652921	0.998717949	0.894374282	0.943670503	0.971986335	0.028013665	0.815109344	0.890336591	0.85106383
308	1	0	1	1	1	0.89347079	0.10652921	0.998717949	0.894374282	0.943670503	0.971986335	0.028013665	0.815109344	0.890336591	0.85106383
308	1	0	1	1	1	0.89347079	0.10652921	0.998717949	0.894374282	0.943670503	0.971986335	0.028013665	0.815109344	0.890336591	0.85106383
308	1	0	1	1	1	0.89347079	0.10652921	0.998717949	0.894374282	0.943670503	0.971986335	0.028013665	0.815109344	0.890336591	0.85106383
308	1	0	1	1	1	0.89347079	0.10652921	0.998717949	0.894374282	0.943670503	0.971986335	0.028013665	0.815109344	0.890336591	0.85106383
308	1	0	1	1	1	0.89347079	0.10652921	0.998717949	0.894374282	0.943670503	0.971986335	0.028013665	0.815109344	0.890336591	0.85106383
308	1	0	1	1	1	0.89347079	0.10652921	0.998717949	0.894374282	0.943670503	0.971986335	0.028013665	0.815109344	0.890336591	0.85106383
308	1	0	1	1	1	0.89347079	0.10652921	0.998717949	0.894374282	0.943670503	0.971986335	0.028013665	0.815109344	0.890336591	0.85106383
308	1	0	1	1	1	0.89347079	0.10652921	0.998717949	0.894374282	0.943670503	0.971986335	0.028013665	0.815109344	0.890336591	0.85106383
308	1	0	1	1	1	0.89347079	0.10652921	0.998717949	0.894374282	0.943670503	0.971986335	0.028013665	0.815109344	0.890336591	0.85106383
308	1	0	1	1	1	0.89347079	0.10652921	0.998717949	0.894374282	0.943670503	0.971986335	0.028013665	0.815109344	0.890336591	0.85106383
308	1	0	1	1	1	0.89347079	0.10652921	0.998717949	0.894374282	0.943670503	0.971986335	0.028013665	0.815109344	0.890336591	0.85106383
308	1	0	1	1	1	0.89347079	0.10652921	0.998717949	0.894374282	0.943670503	0.971986335	0.028013665	0.815109344	0.890336591	0.85106383
308	1	0	1	1	1	0.89347079	0.10652921	0.998717949	0.894374282	0.943670503	0.971986335	0.028013665	0.815109344	0.890336591	0.85106383
308	1	0	1	1	1	0.89347079	0.10652921	0.998717949	0.894374282	0.943670503	0.971986335	0.028013665	0.815109344	0.890336591	0.85106383
308	1	0	1	1	1	0.89347079	0.10652921	0.998717949	0.894374282	0.943670503	0.971986335	0.028013665	0.815109344	0.890336591	0.85106383
308	1	0	1	1	1	0.89347079	0.10652921	0.998717949	0.894374282	0.943670503	0.971986335	0.028013665	0.815109344	0.890336591	0.85106383
308	1	0	1	1	1	0.89347079	0.10652921	0.998717949	0.894374282	0.943670503	0.971986335	0.028013665	0.815109344	0.890336591	0.85106383
308	1	0	1	1	1	0.89347079	0.10652921	0.998717949	0.894374282	0.943670503	0.971986335	0.028013665	0.815109344	0.890336591	0.85106383
308	1	0	1	1	1	0.89347079	0.10652921	0.998717949	0.894374282	0.943670503	0.971986335	0.028013665	0.815109344	0.890336591	0.85106383
308	1	0	1	1	1	0.89347079	0.10652921	0.998717949	0.894374282	0.943670503	0.971986335	0.028013665	0.815109344	0.890336591	0.85106383
308	1	0	1	1	1	0.89347079	0.10652921	0.998717949	0.894374282	0.943670503	0.971986335	0.028013665	0.815109344	0.890336591	0.85106383
308	1	0	1	1	1	0.89347079	0.10652921	0.998717949	0.894374282	0.943670503	0.971986335	0.028013665	0.815109344	0.890336591	0.85106383
308	1	0	1	1	1	0.89347079	0.10652921	0.998717949	0.894374282	0.943670503	0.971986335	0.028013665	0.815109344	0.890336591	0.85106383
308	1	0	1	1	1	0.89347079	0.10652921	0.998717949	0.894374282	0.943670503	0.971986335	0.028013665	0.815109344	0.890336591	0.85106383
308	1	0	1	1	1	0.89347079	0.10652921	0.998717949	0.894374282	0.943670503	0.971986335	0.028013665	0.815109344	0.890336591	0.85106383
308	1	0	1	1	1	0.89347079	0.10652921	0.998717949	0.894374282	0.943670503	0.971986335	0.028013665	0.815109344	0.890336591	0.85106383
308	1	0	1	1	1	0.89347079	0.10652921	0.998717949	0.894374282	0.943670503	0.971986335	0.028013665	0.815109344	0.890336591	0.85106383
308	1	0	1	1	1	0.89347079	0.10652921	0.998717949	0.894374282	0.943670503	0.971986335	0.028013665	0.815109344	0.890336591	0.85106383
308	1	0	1	1	1	0.89347079	0.10652921	0.998717949	0.894374282	0.943670503	0.971986335	0.028013665	0.815109344	0.890336591	0.85106383
308	1	0	1	1	1	0.89347079	0.10652921	0.998717949	0.894374282	0.943670503	0.971986335	0.028013665	0.815109344	0.890336591	0.85106383
308	1	0	1	1	1	0.89347079	0.10652921	0.998717949	0.894374282	0.943670503	0.971986335	0.028013665	0.815109344	0.890336591	0.85106383
308	1	0	1	1	1	0.89347079	0.10652921	0.998717949	0.894374282	0.943670503	0.971986335	0.028013665	0.815109344	0.890336591	0.85106383
308	1	0	1	1	1	0.89347079	0.10652921	0.998717949	0.894374282	0.943670503	0.971986335	0.028013665	0.815109344	0.890336591	0.85106383
308	1	0	1	1	1	0.89347079	0.10652921	0.998717949	0.894374282	0.943670503	0.971986335	0.028013665	0.815109344	0.890336591	0.85106383
308	1	0	1	1	1	0.89347079	0.10652921	0.998717949	0.894374282	0.943670503	0.971986335	0.028013665	0.815109344	0.890336591	0.85106383
308	1	0	1	1	1	0.89347079	0.10652921	0.998717949	0.894374282	0.943670503	0.971986335	0.028013665	0.815109344	0.890336591	0.85106383
308	1	0	1	1	1	0.89347079	0.10652921	0.998717949	0.894374282	0.943670503	0.971986335	0.028013665	0.815109344	0.890336591	0.85106383
308	1	0	1	1	1	0.89347079	0.10652921	0.998717949	0.894374282	0.943670503	0.971986335	0.028013665	0.815109344	0.890336591	0.85106383
308	1	0	1	1	1	0.89347079	0.10652921	0.998717949	0.894374282	0.943670503	0.971986335	0.028013665	0.815109344	0.890336591	0.85106383
308	1	0	1	1	1	0.89347079	0.10652921	0.998717949	0.894374282	0.943670503	0.971986335	0.028013665	0.815109344	0.890336591	0.85106383
308	1	0	1	1	1	0.89347079	0.10652921	0.998717949	0.894374282	0.943670503	0.971986335	0.028013665	0.815109344	0.890336591	0.85106383
308	1	0	1	1	1	0.89347079	0.10652921	0.998717949	0.894374282	0.943670503	0.971986335	0.028013665	0.815109344	0.890336591	0.85106383
308	1	0	1	1	1	0.89347079	0.10652921	0.998717949	0.894374282	0.943670503	0.971986335	0.028013665	0.815109344	0.890336591	0.85106383
308	1	0	1	1	1	0.89347079	0.10652921	0.998717949	0.894374282	0.943670503	0.971986335	0.028013665	0.815109344	0.890336591	0.85106383
308	1	0	1	1	1	0.89347079	0.10652921	0.998717949	0.894374282	0.943670503	0.971986335	0.028013665	0.815109344	0.890336591	0.85106383
308	1	0	1	1	1	0.89347079	0.10652921	0.998717949	0.894374282	0.943670503	0.971986335	0.028013665	0.815109344	0.890336591	0.85106383
308	1	0	1	1	1	0.89347079	0.10652921	0.998717949	0.894374282	0.943670503	0.971986335	0.028013665	0.815109344	0.890336591	0.85106383
308	1	0	1	1	1	0.89347079	0.10652921	0.998717949	0.894374282	0.943670503	0.971986335	0.028013665	0.815109344	0.890336591	0.85106383
308	1	0	1	1	1	0.89347079	0.10652921	0.998717949	0.894374282	0.943670503	0.971986335	0.028013665	0.815109344	0.890336591	0.85106383
308	1	0	1	1	1	0.89347079	0.10652921	0.998717949	0.894374282	0.943670503	0.971986335	0.028013665	0.815109344	0.890336591	0.85106383
308	1	0	1	1	1	0.89347079	0.10652921	0.998717949	0.894374282	0.943670503	0.971986335	0.028013665	0.815109344	0.890336591	0.85106383
308	1	0	1	1	1	0.89347079	0.10652921	0.998717949	0.894374282	0.943670503	0.971986335	0.028013665	0.815109344	0.890336591	0.85106383
308	1	0	1	1	1	0.89347079	0.10652921	0.998717949	0.894374282	0.943670503	0.971986335	0.028013665	0.815109344	0.890336591	0.85106383
308	1	0	1	1	1	0.89347079	0.10652921	0.998717949	0.894374282	0.943670503	0.971986335	0.028013665	0.815109344	0.890336591	0.85106383
308	1	0	1	1	1	0.89347079	0.10652921	0.998717949	0.894374282	0.943670503	0.971986335	0.028013665	0.815109344	0.890336591	0.85106383
308	1	0	1	1	1	0.89347079	0.10652921	0.998717949	0.894374282	0.943670503	0.971986335	0.028013665	0.815109344	0.890336591	0.85106383
308	1	0	1	1	1	0.89347079	0.10652921	0.998717949	0.894374282	0.943670503	0.971986335	0.028013665	0.815109344	0.890336591	0.85106383
308	1	0	1	1	1	0.89347079	0.10652921	0.998717949	0.894374282	0.943670503	0.971986335	0.028013665	0.815109344	0.890336591	0.85106383
308	1	0	1	1	1	0.89347079	0.10652921	0.998717949	0.894374282	0.943670503	0.971986335	0.028013665	0.815109344	0.890336591	0.85106383
308	1	0	1	1	1	0.89347079	0.10652921	0.998717949	0.894374282	0.943670503	0.971986335	0.028013665	0.815109344	0.890336591	0.85106383
308	1	0	1	1	1	0.89347079	0.10652921	0.998717949	0.894374282	0.943670503	0.971986335	0.028013665	0.815109344	0.890336591	0.85106383
308	1	0	1	1	1	0.89347079	0.10652921	0.998717949	0.894374282	0.943670503	0.971986335	0.028013665	0.815109344	0.890336591	0.85106383
308	1	0	1	1	1	0.89347079	0.10652921	0.998717949	0.894374282	0.943670503	0.971986335	0.028013665	0.815109344	0.890336591	0.85106383
308	1	0	1	1	1	0.89347079	0.10652921	0.998717949	0.894374282	0.943670503	0.971986335	0.028013665	0.815109344	0.890336591	0.85106383
308	1	0	1	1	1	0.89347079	0.10652921	0.998717949	0.894374282	0.943670503	0.971986335	0.028013665	0.815109344	0.890336591	0.85106383
308	1	0	1	1	1	0.89347079	0.10652921	0.998717949	0.894374282	0.943670503	0.971986335	0.028013665	0.815109344	0.890336591	0.85106383
308	1	0	1	1	1	0.89347079	0.10652921	0.998717949	0.894374282	0.943670503	0.971986335	0.028013665	0.815109344	0.890336591	0.85106383
308	1	0	1	1	1	0.89347079	0.10652921	0.998717949	0.894374282	0.943670503	0.971986335	0.028013665	0.815109344	0.890336591	0.85106383
308	1	0	1	1	1	0.89347079	0.10652921	0.998717949	0.894374282	0.943670503	0.971986335	0.028013665	0.815109344	0.890336591	0.85106383
308	1	0	1	1	1	0.89347079	0.10652921	0.998717949	0.894374282	0.943670503	0.971986335	0.028013665	0.815109344	0.890336591	0.85106383
308	1	0	1	1	1	0.89347079	0.10652921	0.998717949	0.894374282	0.943670503	0.971986335	0.028013665	0.815109344	0.890336591	0.85106383
308	1	0	1	1	1	0.89347079	0.10652921	0.998717949	0.894374282	0.943670503	0.971986335	0.028013665	0.815109344	0.890336591	0.85106383
308	1	0	1	1	1	0.89347079	0.10652921	0.998717949	0.894374282	0.943670503	0.971986335	0.028013665	0.815109344	0.890336591	0.85106383
308	1	0	1	1	1	0.89347079	0.10652921	0.998717949	0.894374282	0.943670503	0.971986335	0.028013665	0.815109344	0.890336591	0.85106383
308	1	0	1	1	1	0.89347079	0.10652921	0.998717949	0.894374282	0.943670503	0.971986335	0.028013665	0.815109344	0.890336591	0.85106383
308	1	0	1	1	1	0.89347079	0.10652921	0.998717949	0.894374282	0.943670503	0.971986335	0.028013665	0.815109344	0.890336591	0.85106383
308	1	0	1	1	1	0.89347079	0.10652921	0.998717949	0.894374282	0.943670503	0.971986335	0.028013665	0.815109344	0.890336591	0.85106383
