# Supplementary material for: An Improved Hybrid Feature Selection Algorithm for Electric Charge Recovery Risk
Source: Hindawi journal article supplement (doi:10.1155/2020/8479341), 2020-08-28
Supplement: f1 [file 8479341.f1.zip › 8479341.f1/Experimental Results/201808/BGA_results.csv]

features_num	Accuracy_high	Loss_high	Precission_high	Recall_high	F1_high	Accuracy_med	Loss_med	Precission_med	Recall_med	F1_med	Accuracy_low	Loss_low	Precission_low	Recall_low	F1_low
391	1.0	0.0	1.0	1.0	1.0	0.8798449612403101	0.12015503875968991	0.9768722466960352	0.895959595959596	0.934668071654373	0.9187056826126037	0.08129431738739634	0.4662965900079302	0.8065843621399177	0.5909547738693467
384	1.0	0.0	1.0	1.0	1.0	0.8505494505494505	0.14945054945054947	0.9961190168175937	0.8527131782945736	0.918854415274463	0.9538054138877992	0.04619458611220084	0.6990196078431372	0.8129988597491448	0.7517132314180284
384	1.0	0.0	1.0	1.0	1.0	0.8505494505494505	0.14945054945054947	0.9961190168175937	0.8527131782945736	0.918854415274463	0.9538054138877992	0.04619458611220084	0.6990196078431372	0.8129988597491448	0.7517132314180284
384	1.0	0.0	1.0	1.0	1.0	0.8505494505494505	0.14945054945054947	0.9961190168175937	0.8527131782945736	0.918854415274463	0.9538054138877992	0.04619458611220084	0.6990196078431372	0.8129988597491448	0.7517132314180284
384	1.0	0.0	1.0	1.0	1.0	0.8505494505494505	0.14945054945054947	0.9961190168175937	0.8527131782945736	0.918854415274463	0.9538054138877992	0.04619458611220084	0.6990196078431372	0.8129988597491448	0.7517132314180284
386	1.0	0.0	1.0	1.0	1.0	0.8551042810098792	0.14489571899012077	0.9961439588688946	0.8573008849557522	0.9215219976218787	0.9537027954879843	0.04629720451201569	0.697265625	0.815068493150685	0.7515789473684211
386	1.0	0.0	1.0	1.0	1.0	0.8551042810098792	0.14489571899012077	0.9961439588688946	0.8573008849557522	0.9215219976218787	0.9537027954879843	0.04629720451201569	0.697265625	0.815068493150685	0.7515789473684211
403	1.0	0.0	1.0	1.0	1.0	0.8543140028288543	0.14568599717114572	1.0	0.8539007092198582	0.9211935730680948	0.9534928413567791	0.04650715864322086	0.768609865470852	0.791320406278855	0.7797998180163784
403	1.0	0.0	1.0	1.0	1.0	0.8543140028288543	0.14568599717114572	1.0	0.8539007092198582	0.9211935730680948	0.9534928413567791	0.04650715864322086	0.768609865470852	0.791320406278855	0.7797998180163784
403	1.0	0.0	1.0	1.0	1.0	0.8543140028288543	0.14568599717114572	1.0	0.8539007092198582	0.9211935730680948	0.9534928413567791	0.04650715864322086	0.768609865470852	0.791320406278855	0.7797998180163784
393	1.0	0.0	1.0	1.0	1.0	0.8631961259079903	0.13680387409200967	0.9971988795518207	0.8651275820170109	0.9264801561483409	0.9633411124076235	0.036658887592376455	0.7683823529411765	0.8699271592091571	0.8160078086871644
400	1.0	0.0	1.0	1.0	1.0	0.8621103117505995	0.1378896882494005	0.9972144846796658	0.8636911942098915	0.9256625727213963	0.9644734280708585	0.03552657192914155	0.78	0.8593913955928646	0.8177733399900151
414	1.0	0.0	1.0	1.0	1.0	0.843609022556391	0.15639097744360897	1.0	0.8433734939759037	0.9150326797385622	0.9677481098669729	0.032251890133027095	0.8946840521564694	0.7935943060498221	0.8411126826968411
414	1.0	0.0	1.0	1.0	1.0	0.843609022556391	0.15639097744360897	1.0	0.8433734939759037	0.9150326797385622	0.9677481098669729	0.032251890133027095	0.8946840521564694	0.7935943060498221	0.8411126826968411
389	1.0	0.0	1.0	1.0	1.0	0.840625	0.15937500000000004	1.0	0.8401253918495298	0.9131175468483816	0.9685024339028347	0.03149756609716525	0.9237899073120495	0.7779705117085863	0.844632768361582
413	1.0	0.0	1.0	1.0	1.0	0.8408450704225352	0.1591549295774648	1.0	0.8403954802259888	0.91327705295472	0.9752932128436839	0.024706787156316135	0.8928229665071771	0.865491651205937	0.8789448893075836
413	1.0	0.0	1.0	1.0	1.0	0.8408450704225352	0.1591549295774648	1.0	0.8403954802259888	0.91327705295472	0.9752932128436839	0.024706787156316135	0.8928229665071771	0.865491651205937	0.8789448893075836
413	1.0	0.0	1.0	1.0	1.0	0.8408450704225352	0.1591549295774648	1.0	0.8403954802259888	0.91327705295472	0.9752932128436839	0.024706787156316135	0.8928229665071771	0.865491651205937	0.8789448893075836
386	1.0	0.0	1.0	1.0	1.0	0.8435277382645804	0.15647226173541962	1.0	0.8430813124108416	0.9148606811145511	0.9753098280334326	0.02469017196656742	0.8950381679389313	0.864516129032258	0.8795124238162213
386	1.0	0.0	1.0	1.0	1.0	0.8435277382645804	0.15647226173541962	1.0	0.8430813124108416	0.9148606811145511	0.9753098280334326	0.02469017196656742	0.8950381679389313	0.864516129032258	0.8795124238162213
399	1.0	0.0	1.0	1.0	1.0	0.8437067773167358	0.15629322268326418	1.0	0.8432732316227461	0.9149736644093303	0.9768964189449365	0.023103581055063493	0.8976833976833977	0.8740601503759399	0.8857142857142858
399	1.0	0.0	1.0	1.0	1.0	0.8437067773167358	0.15629322268326418	1.0	0.8432732316227461	0.9149736644093303	0.9768964189449365	0.023103581055063493	0.8976833976833977	0.8740601503759399	0.8857142857142858
399	1.0	0.0	1.0	1.0	1.0	0.8437067773167358	0.15629322268326418	1.0	0.8432732316227461	0.9149736644093303	0.9768964189449365	0.023103581055063493	0.8976833976833977	0.8740601503759399	0.8857142857142858
386	1.0	0.0	1.0	1.0	1.0	0.832258064516129	0.16774193548387095	1.0	0.8320413436692506	0.9083215796897038	0.9807562131321922	0.01924378686780781	0.9064676616915422	0.8966535433070866	0.9015338941118258
386	1.0	0.0	1.0	1.0	1.0	0.832258064516129	0.16774193548387095	1.0	0.8320413436692506	0.9083215796897038	0.9807562131321922	0.01924378686780781	0.9064676616915422	0.8966535433070866	0.9015338941118258
386	1.0	0.0	1.0	1.0	1.0	0.832258064516129	0.16774193548387095	1.0	0.8320413436692506	0.9083215796897038	0.9807562131321922	0.01924378686780781	0.9064676616915422	0.8966535433070866	0.9015338941118258
386	1.0	0.0	1.0	1.0	1.0	0.832258064516129	0.16774193548387095	1.0	0.8320413436692506	0.9083215796897038	0.9807562131321922	0.01924378686780781	0.9064676616915422	0.8966535433070866	0.9015338941118258
386	1.0	0.0	1.0	1.0	1.0	0.832258064516129	0.16774193548387095	1.0	0.8320413436692506	0.9083215796897038	0.9807562131321922	0.01924378686780781	0.9064676616915422	0.8966535433070866	0.9015338941118258
388	1.0	0.0	1.0	1.0	1.0	0.8324742268041238	0.16752577319587625	1.0	0.832258064516129	0.9084507042253521	0.9808510638297873	0.019148936170212738	0.9072781655034895	0.896551724137931	0.9018830525272548
388	1.0	0.0	1.0	1.0	1.0	0.8324742268041238	0.16752577319587625	1.0	0.832258064516129	0.9084507042253521	0.9808510638297873	0.019148936170212738	0.9072781655034895	0.896551724137931	0.9018830525272548
391	1.0	0.0	1.0	1.0	1.0	0.8412213740458016	0.15877862595419845	1.0	0.8409785932721713	0.9136212624584719	0.9805890227576974	0.019410977242302563	0.9329608938547486	0.884377758164166	0.9080199365654734
391	1.0	0.0	1.0	1.0	1.0	0.8412213740458016	0.15877862595419845	1.0	0.8409785932721713	0.9136212624584719	0.9805890227576974	0.019410977242302563	0.9329608938547486	0.884377758164166	0.9080199365654734
391	1.0	0.0	1.0	1.0	1.0	0.8412213740458016	0.15877862595419845	1.0	0.8409785932721713	0.9136212624584719	0.9805890227576974	0.019410977242302563	0.9329608938547486	0.884377758164166	0.9080199365654734
391	1.0	0.0	1.0	1.0	1.0	0.8412213740458016	0.15877862595419845	1.0	0.8409785932721713	0.9136212624584719	0.9805890227576974	0.019410977242302563	0.9329608938547486	0.884377758164166	0.9080199365654734
385	1.0	0.0	1.0	1.0	1.0	0.8338557993730408	0.16614420062695923	1.0	0.8333333333333334	0.9090909090909091	0.9814850162244703	0.018514983775529736	0.9411764705882353	0.8873483535528596	0.9134701159678859
387	1.0	0.0	1.0	1.0	1.0	0.8368678629690048	0.16313213703099516	1.0	0.8363338788870703	0.9108734402852049	0.9809578215747882	0.01904217842521183	0.9462169553327257	0.8804071246819338	0.9121265377855886
387	1.0	0.0	1.0	1.0	1.0	0.8368678629690048	0.16313213703099516	1.0	0.8363338788870703	0.9108734402852049	0.9809578215747882	0.01904217842521183	0.9462169553327257	0.8804071246819338	0.9121265377855886
382	1.0	0.0	1.0	1.0	1.0	0.8341902313624678	0.16580976863753216	1.0	0.833976833976834	0.9094736842105262	0.9835542226951727	0.016445777304827325	0.9143700787401575	0.9179841897233202	0.916173570019724
382	1.0	0.0	1.0	1.0	1.0	0.8341902313624678	0.16580976863753216	1.0	0.833976833976834	0.9094736842105262	0.9835542226951727	0.016445777304827325	0.9143700787401575	0.9179841897233202	0.916173570019724
382	1.0	0.0	1.0	1.0	1.0	0.8341902313624678	0.16580976863753216	1.0	0.833976833976834	0.9094736842105262	0.9835542226951727	0.016445777304827325	0.9143700787401575	0.9179841897233202	0.916173570019724
386	1.0	0.0	1.0	1.0	1.0	0.8369987063389392	0.16300129366106075	1.0	0.8367875647668394	0.9111424541607899	0.9835621736608006	0.016437826339199435	0.9147894221351616	0.9183874139626352	0.9165848871442591
386	1.0	0.0	1.0	1.0	1.0	0.8369987063389392	0.16300129366106075	1.0	0.8367875647668394	0.9111424541607899	0.9835621736608006	0.016437826339199435	0.9147894221351616	0.9183874139626352	0.9165848871442591
386	1.0	0.0	1.0	1.0	1.0	0.8369987063389392	0.16300129366106075	1.0	0.8367875647668394	0.9111424541607899	0.9835621736608006	0.016437826339199435	0.9147894221351616	0.9183874139626352	0.9165848871442591
386	1.0	0.0	1.0	1.0	1.0	0.8369987063389392	0.16300129366106075	1.0	0.8367875647668394	0.9111424541607899	0.9835621736608006	0.016437826339199435	0.9147894221351616	0.9183874139626352	0.9165848871442591
374	1.0	0.0	1.0	1.0	1.0	0.831946755407654	0.16805324459234605	1.0	0.831946755407654	0.9082652134423251	0.9825979459870673	0.01740205401293271	0.95483288166215	0.888235294117647	0.9203308663474096
378	1.0	0.0	1.0	1.0	1.0	0.8352745424292846	0.16472545757071544	1.0	0.8352745424292846	0.9102447869446962	0.9826930391783948	0.01730696082160521	0.9548736462093863	0.8890756302521008	0.9208006962576154
384	1.0	0.0	1.0	1.0	1.0	0.8344370860927153	0.16556291390728473	1.0	0.8344370860927153	0.9097472924187726	0.9829734614287073	0.01702653857129266	0.9556962025316456	0.8904802021903959	0.9219363279546445
384	1.0	0.0	1.0	1.0	1.0	0.8344370860927153	0.16556291390728473	1.0	0.8344370860927153	0.9097472924187726	0.9829734614287073	0.01702653857129266	0.9556962025316456	0.8904802021903959	0.9219363279546445
384	1.0	0.0	1.0	1.0	1.0	0.8344370860927153	0.16556291390728473	1.0	0.8344370860927153	0.9097472924187726	0.9829734614287073	0.01702653857129266	0.9556962025316456	0.8904802021903959	0.9219363279546445
377	1.0	0.0	1.0	1.0	1.0	0.8355481727574751	0.16445182724252494	1.0	0.8355481727574751	0.9104072398190045	0.9829766999524489	0.01702330004755115	0.9566003616636528	0.8898233809924306	0.922004357298475
385	1.0	0.0	1.0	1.0	1.0	0.8372093023255814	0.16279069767441856	1.0	0.8372093023255814	0.9113924050632911	0.9830718021873514	0.01692819781264865	0.9566395663956639	0.8906644238856182	0.9224738675958188
381	1.0	0.0	1.0	1.0	1.0	0.8374792703150912	0.16252072968490883	1.0	0.8374792703150912	0.9115523465703971	0.9831653034049839	0.01683469659501613	0.9558160504959423	0.8922558922558923	0.9229429690901176
381	1.0	0.0	1.0	1.0	1.0	0.8374792703150912	0.16252072968490883	1.0	0.8374792703150912	0.9115523465703971	0.9831653034049839	0.01683469659501613	0.9558160504959423	0.8922558922558923	0.9229429690901176
381	1.0	0.0	1.0	1.0	1.0	0.8374792703150912	0.16252072968490883	1.0	0.8374792703150912	0.9115523465703971	0.9831653034049839	0.01683469659501613	0.9558160504959423	0.8922558922558923	0.9229429690901176
381	1.0	0.0	1.0	1.0	1.0	0.8374792703150912	0.16252072968490883	1.0	0.8374792703150912	0.9115523465703971	0.9831653034049839	0.01683469659501613	0.9558160504959423	0.8922558922558923	0.9229429690901176
381	1.0	0.0	1.0	1.0	1.0	0.8374792703150912	0.16252072968490883	1.0	0.8374792703150912	0.9115523465703971	0.9831653034049839	0.01683469659501613	0.9558160504959423	0.8922558922558923	0.9229429690901176
381	1.0	0.0	1.0	1.0	1.0	0.8374792703150912	0.16252072968490883	1.0	0.8374792703150912	0.9115523465703971	0.9831653034049839	0.01683469659501613	0.9558160504959423	0.8922558922558923	0.9229429690901176
381	1.0	0.0	1.0	1.0	1.0	0.8374792703150912	0.16252072968490883	1.0	0.8374792703150912	0.9115523465703971	0.9831653034049839	0.01683469659501613	0.9558160504959423	0.8922558922558923	0.9229429690901176
381	1.0	0.0	1.0	1.0	1.0	0.8374792703150912	0.16252072968490883	1.0	0.8374792703150912	0.9115523465703971	0.9831653034049839	0.01683469659501613	0.9558160504959423	0.8922558922558923	0.9229429690901176
381	1.0	0.0	1.0	1.0	1.0	0.8374792703150912	0.16252072968490883	1.0	0.8374792703150912	0.9115523465703971	0.9831653034049839	0.01683469659501613	0.9558160504959423	0.8922558922558923	0.9229429690901176
381	1.0	0.0	1.0	1.0	1.0	0.8374792703150912	0.16252072968490883	1.0	0.8374792703150912	0.9115523465703971	0.9831653034049839	0.01683469659501613	0.9558160504959423	0.8922558922558923	0.9229429690901176
381	1.0	0.0	1.0	1.0	1.0	0.8374792703150912	0.16252072968490883	1.0	0.8374792703150912	0.9115523465703971	0.9831653034049839	0.01683469659501613	0.9558160504959423	0.8922558922558923	0.9229429690901176
381	1.0	0.0	1.0	1.0	1.0	0.8374792703150912	0.16252072968490883	1.0	0.8374792703150912	0.9115523465703971	0.9831653034049839	0.01683469659501613	0.9558160504959423	0.8922558922558923	0.9229429690901176
381	1.0	0.0	1.0	1.0	1.0	0.8374792703150912	0.16252072968490883	1.0	0.8374792703150912	0.9115523465703971	0.9831653034049839	0.01683469659501613	0.9558160504959423	0.8922558922558923	0.9229429690901176
381	1.0	0.0	1.0	1.0	1.0	0.8374792703150912	0.16252072968490883	1.0	0.8374792703150912	0.9115523465703971	0.9831653034049839	0.01683469659501613	0.9558160504959423	0.8922558922558923	0.9229429690901176
381	1.0	0.0	1.0	1.0	1.0	0.8374792703150912	0.16252072968490883	1.0	0.8374792703150912	0.9115523465703971	0.9831653034049839	0.01683469659501613	0.9558160504959423	0.8922558922558923	0.9229429690901176
378	1.0	0.0	1.0	1.0	1.0	0.8374792703150912	0.16252072968490883	1.0	0.8374792703150912	0.9115523465703971	0.9833555259653795	0.01664447403462055	0.9567177637511272	0.8930976430976431	0.9238136700043534
378	1.0	0.0	1.0	1.0	1.0	0.8374792703150912	0.16252072968490883	1.0	0.8374792703150912	0.9115523465703971	0.9833555259653795	0.01664447403462055	0.9567177637511272	0.8930976430976431	0.9238136700043534
378	1.0	0.0	1.0	1.0	1.0	0.8374792703150912	0.16252072968490883	1.0	0.8374792703150912	0.9115523465703971	0.9833555259653795	0.01664447403462055	0.9567177637511272	0.8930976430976431	0.9238136700043534
378	1.0	0.0	1.0	1.0	1.0	0.8374792703150912	0.16252072968490883	1.0	0.8374792703150912	0.9115523465703971	0.9833555259653795	0.01664447403462055	0.9567177637511272	0.8930976430976431	0.9238136700043534
378	1.0	0.0	1.0	1.0	1.0	0.8374792703150912	0.16252072968490883	1.0	0.8374792703150912	0.9115523465703971	0.9833555259653795	0.01664447403462055	0.9567177637511272	0.8930976430976431	0.9238136700043534
378	1.0	0.0	1.0	1.0	1.0	0.8374792703150912	0.16252072968490883	1.0	0.8374792703150912	0.9115523465703971	0.9833555259653795	0.01664447403462055	0.9567177637511272	0.8930976430976431	0.9238136700043534
378	1.0	0.0	1.0	1.0	1.0	0.8374792703150912	0.16252072968490883	1.0	0.8374792703150912	0.9115523465703971	0.9833555259653795	0.01664447403462055	0.9567177637511272	0.8930976430976431	0.9238136700043534
378	1.0	0.0	1.0	1.0	1.0	0.8374792703150912	0.16252072968490883	1.0	0.8374792703150912	0.9115523465703971	0.9833555259653795	0.01664447403462055	0.9567177637511272	0.8930976430976431	0.9238136700043534
378	1.0	0.0	1.0	1.0	1.0	0.8374792703150912	0.16252072968490883	1.0	0.8374792703150912	0.9115523465703971	0.9833555259653795	0.01664447403462055	0.9567177637511272	0.8930976430976431	0.9238136700043534
378	1.0	0.0	1.0	1.0	1.0	0.8374792703150912	0.16252072968490883	1.0	0.8374792703150912	0.9115523465703971	0.9833555259653795	0.01664447403462055	0.9567177637511272	0.8930976430976431	0.9238136700043534
375	1.0	0.0	1.0	1.0	1.0	0.8397328881469115	0.1602671118530885	1.0	0.8397328881469115	0.9128856624319419	0.9830766305381251	0.016923369461874893	0.9575812274368231	0.8901006711409396	0.922608695652174
375	1.0	0.0	1.0	1.0	1.0	0.8397328881469115	0.1602671118530885	1.0	0.8397328881469115	0.9128856624319419	0.9830766305381251	0.016923369461874893	0.9575812274368231	0.8901006711409396	0.922608695652174
375	1.0	0.0	1.0	1.0	1.0	0.8397328881469115	0.1602671118530885	1.0	0.8397328881469115	0.9128856624319419	0.9830766305381251	0.016923369461874893	0.9575812274368231	0.8901006711409396	0.922608695652174
375	1.0	0.0	1.0	1.0	1.0	0.8397328881469115	0.1602671118530885	1.0	0.8397328881469115	0.9128856624319419	0.9830766305381251	0.016923369461874893	0.9575812274368231	0.8901006711409396	0.922608695652174
375	1.0	0.0	1.0	1.0	1.0	0.8397328881469115	0.1602671118530885	1.0	0.8397328881469115	0.9128856624319419	0.9830766305381251	0.016923369461874893	0.9575812274368231	0.8901006711409396	0.922608695652174
375	1.0	0.0	1.0	1.0	1.0	0.8397328881469115	0.1602671118530885	1.0	0.8397328881469115	0.9128856624319419	0.9830766305381251	0.016923369461874893	0.9575812274368231	0.8901006711409396	0.922608695652174
375	1.0	0.0	1.0	1.0	1.0	0.8397328881469115	0.1602671118530885	1.0	0.8397328881469115	0.9128856624319419	0.9830766305381251	0.016923369461874893	0.9575812274368231	0.8901006711409396	0.922608695652174
375	1.0	0.0	1.0	1.0	1.0	0.8397328881469115	0.1602671118530885	1.0	0.8397328881469115	0.9128856624319419	0.9830766305381251	0.016923369461874893	0.9575812274368231	0.8901006711409396	0.922608695652174
375	1.0	0.0	1.0	1.0	1.0	0.8397328881469115	0.1602671118530885	1.0	0.8397328881469115	0.9128856624319419	0.9830766305381251	0.016923369461874893	0.9575812274368231	0.8901006711409396	0.922608695652174
375	1.0	0.0	1.0	1.0	1.0	0.8397328881469115	0.1602671118530885	1.0	0.8397328881469115	0.9128856624319419	0.9830766305381251	0.016923369461874893	0.9575812274368231	0.8901006711409396	0.922608695652174
375	1.0	0.0	1.0	1.0	1.0	0.8397328881469115	0.1602671118530885	1.0	0.8397328881469115	0.9128856624319419	0.9830766305381251	0.016923369461874893	0.9575812274368231	0.8901006711409396	0.922608695652174
375	1.0	0.0	1.0	1.0	1.0	0.8397328881469115	0.1602671118530885	1.0	0.8397328881469115	0.9128856624319419	0.9830766305381251	0.016923369461874893	0.9575812274368231	0.8901006711409396	0.922608695652174
375	1.0	0.0	1.0	1.0	1.0	0.8397328881469115	0.1602671118530885	1.0	0.8397328881469115	0.9128856624319419	0.9830766305381251	0.016923369461874893	0.9575812274368231	0.8901006711409396	0.922608695652174
380	1.0	0.0	1.0	1.0	1.0	0.8421926910299004	0.15780730897009965	1.0	0.8421926910299004	0.9143372407574392	0.9828815977175464	0.01711840228245365	0.9549143372407575	0.8906644238856182	0.9216710182767623
380	1.0	0.0	1.0	1.0	1.0	0.8421926910299004	0.15780730897009965	1.0	0.8421926910299004	0.9143372407574392	0.9828815977175464	0.01711840228245365	0.9549143372407575	0.8906644238856182	0.9216710182767623
380	1.0	0.0	1.0	1.0	1.0	0.8421926910299004	0.15780730897009965	1.0	0.8421926910299004	0.9143372407574392	0.9828815977175464	0.01711840228245365	0.9549143372407575	0.8906644238856182	0.9216710182767623
380	1.0	0.0	1.0	1.0	1.0	0.8421926910299004	0.15780730897009965	1.0	0.8421926910299004	0.9143372407574392	0.9828815977175464	0.01711840228245365	0.9549143372407575	0.8906644238856182	0.9216710182767623
380	1.0	0.0	1.0	1.0	1.0	0.8421926910299004	0.15780730897009965	1.0	0.8421926910299004	0.9143372407574392	0.9828815977175464	0.01711840228245365	0.9549143372407575	0.8906644238856182	0.9216710182767623
380	1.0	0.0	1.0	1.0	1.0	0.8421926910299004	0.15780730897009965	1.0	0.8421926910299004	0.9143372407574392	0.9828815977175464	0.01711840228245365	0.9549143372407575	0.8906644238856182	0.9216710182767623
380	1.0	0.0	1.0	1.0	1.0	0.8421926910299004	0.15780730897009965	1.0	0.8421926910299004	0.9143372407574392	0.9828815977175464	0.01711840228245365	0.9549143372407575	0.8906644238856182	0.9216710182767623
380	1.0	0.0	1.0	1.0	1.0	0.8421926910299004	0.15780730897009965	1.0	0.8421926910299004	0.9143372407574392	0.9828815977175464	0.01711840228245365	0.9549143372407575	0.8906644238856182	0.9216710182767623
380	1.0	0.0	1.0	1.0	1.0	0.8421926910299004	0.15780730897009965	1.0	0.8421926910299004	0.9143372407574392	0.9828815977175464	0.01711840228245365	0.9549143372407575	0.8906644238856182	0.9216710182767623
380	1.0	0.0	1.0	1.0	1.0	0.8421926910299004	0.15780730897009965	1.0	0.8421926910299004	0.9143372407574392	0.9828815977175464	0.01711840228245365	0.9549143372407575	0.8906644238856182	0.9216710182767623
380	1.0	0.0	1.0	1.0	1.0	0.8421926910299004	0.15780730897009965	1.0	0.8421926910299004	0.9143372407574392	0.9828815977175464	0.01711840228245365	0.9549143372407575	0.8906644238856182	0.9216710182767623
