# Supplementary material for: An Improved Hybrid Feature Selection Algorithm for Electric Charge Recovery Risk
Source: Hindawi journal article supplement (doi:10.1155/2020/8479341), 2020-08-28
Supplement: f1 [file 8479341.f1.zip › 8479341.f1/Experimental Results/201808/BGA_SBS_results.csv]

features_num	Accuracy_high	Loss_high	Precission_high	Recall_high	F1_high	Accuracy_med	Loss_med	Precission_med	Recall_med	F1_med	Accuracy_low	Loss_low	Precission_low	Recall_low	F1_low
380	1	0	1	1	1	0.8125	0.1875	1	0.8125	0.896551724	0.981690542	0.018309458	0.963702359	0.874074074	0.916702633
379	1	0	1	1	1	0.831666667	0.168333333	1	0.831666667	0.908098271	0.982884853	0.017115147	0.956639566	0.889168766	0.921671018
379	1	0	1	1	1	0.831666667	0.168333333	1	0.831666667	0.908098271	0.982884853	0.017115147	0.956639566	0.889168766	0.921671018
378	1	0	1	1	1	0.832225914	0.167774086	1	0.832225914	0.90843155	0.982881598	0.017118402	0.956561086	0.888982338	0.921534438
378	1	0	1	1	1	0.832225914	0.167774086	1	0.832225914	0.90843155	0.982881598	0.017118402	0.956561086	0.888982338	0.921534438
378	1	0	1	1	1	0.832225914	0.167774086	1	0.832225914	0.90843155	0.982881598	0.017118402	0.956561086	0.888982338	0.921534438
378	1	0	1	1	1	0.832225914	0.167774086	1	0.832225914	0.90843155	0.982881598	0.017118402	0.956561086	0.888982338	0.921534438
377	1	0	1	1	1	0.832225914	0.167774086	1	0.832225914	0.90843155	0.983071802	0.016928198	0.957466063	0.889823381	0.922406277
377	1	0	1	1	1	0.832225914	0.167774086	1	0.832225914	0.90843155	0.983071802	0.016928198	0.957466063	0.889823381	0.922406277
377	1	0	1	1	1	0.832225914	0.167774086	1	0.832225914	0.90843155	0.983071802	0.016928198	0.957466063	0.889823381	0.922406277
377	1	0	1	1	1	0.832225914	0.167774086	1	0.832225914	0.90843155	0.983071802	0.016928198	0.957466063	0.889823381	0.922406277
377	1	0	1	1	1	0.832225914	0.167774086	1	0.832225914	0.90843155	0.983071802	0.016928198	0.957466063	0.889823381	0.922406277
376	1	0	1	1	1	0.833887043	0.166112957	1	0.833887043	0.90942029	0.9829767	0.0170233	0.956600362	0.889823381	0.922004357
376	1	0	1	1	1	0.833887043	0.166112957	1	0.833887043	0.90942029	0.9829767	0.0170233	0.956600362	0.889823381	0.922004357
376	1	0	1	1	1	0.833887043	0.166112957	1	0.833887043	0.90942029	0.9829767	0.0170233	0.956600362	0.889823381	0.922004357
376	1	0	1	1	1	0.833887043	0.166112957	1	0.833887043	0.90942029	0.9829767	0.0170233	0.956600362	0.889823381	0.922004357
375	1	0	1	1	1	0.833887043	0.166112957	1	0.833887043	0.90942029	0.9829767	0.0170233	0.956600362	0.889823381	0.922004357
375	1	0	1	1	1	0.833887043	0.166112957	1	0.833887043	0.90942029	0.9829767	0.0170233	0.956600362	0.889823381	0.922004357
375	1	0	1	1	1	0.833887043	0.166112957	1	0.833887043	0.90942029	0.9829767	0.0170233	0.956600362	0.889823381	0.922004357
374	1	0	1	1	1	0.835548173	0.164451827	1	0.835548173	0.91040724	0.982881598	0.017118402	0.955736224	0.889823381	0.921602787
373	1	0	1	1	1	0.83747927	0.16252073	1	0.83747927	0.911552347	0.983355526	0.016644474	0.956717764	0.893097643	0.92381367
373	1	0	1	1	1	0.83747927	0.16252073	1	0.83747927	0.911552347	0.983355526	0.016644474	0.956717764	0.893097643	0.92381367
373	1	0	1	1	1	0.83747927	0.16252073	1	0.83747927	0.911552347	0.983355526	0.016644474	0.956717764	0.893097643	0.92381367
373	1	0	1	1	1	0.83747927	0.16252073	1	0.83747927	0.911552347	0.983355526	0.016644474	0.956717764	0.893097643	0.92381367
373	1	0	1	1	1	0.83747927	0.16252073	1	0.83747927	0.911552347	0.983355526	0.016644474	0.956717764	0.893097643	0.92381367
373	1	0	1	1	1	0.83747927	0.16252073	1	0.83747927	0.911552347	0.983355526	0.016644474	0.956717764	0.893097643	0.92381367
373	1	0	1	1	1	0.83747927	0.16252073	1	0.83747927	0.911552347	0.983355526	0.016644474	0.956717764	0.893097643	0.92381367
373	1	0	1	1	1	0.83747927	0.16252073	1	0.83747927	0.911552347	0.983355526	0.016644474	0.956717764	0.893097643	0.92381367
373	1	0	1	1	1	0.83747927	0.16252073	1	0.83747927	0.911552347	0.983355526	0.016644474	0.956717764	0.893097643	0.92381367
373	1	0	1	1	1	0.83747927	0.16252073	1	0.83747927	0.911552347	0.983355526	0.016644474	0.956717764	0.893097643	0.92381367
373	1	0	1	1	1	0.83747927	0.16252073	1	0.83747927	0.911552347	0.983355526	0.016644474	0.956717764	0.893097643	0.92381367
373	1	0	1	1	1	0.83747927	0.16252073	1	0.83747927	0.911552347	0.983355526	0.016644474	0.956717764	0.893097643	0.92381367
373	1	0	1	1	1	0.83747927	0.16252073	1	0.83747927	0.911552347	0.983355526	0.016644474	0.956717764	0.893097643	0.92381367
373	1	0	1	1	1	0.83747927	0.16252073	1	0.83747927	0.911552347	0.983355526	0.016644474	0.956717764	0.893097643	0.92381367
373	1	0	1	1	1	0.83747927	0.16252073	1	0.83747927	0.911552347	0.983355526	0.016644474	0.956717764	0.893097643	0.92381367
373	1	0	1	1	1	0.83747927	0.16252073	1	0.83747927	0.911552347	0.983355526	0.016644474	0.956717764	0.893097643	0.92381367
373	1	0	1	1	1	0.83747927	0.16252073	1	0.83747927	0.911552347	0.983355526	0.016644474	0.956717764	0.893097643	0.92381367
373	1	0	1	1	1	0.83747927	0.16252073	1	0.83747927	0.911552347	0.983355526	0.016644474	0.956717764	0.893097643	0.92381367
373	1	0	1	1	1	0.83747927	0.16252073	1	0.83747927	0.911552347	0.983355526	0.016644474	0.956717764	0.893097643	0.92381367
373	1	0	1	1	1	0.83747927	0.16252073	1	0.83747927	0.911552347	0.983355526	0.016644474	0.956717764	0.893097643	0.92381367
373	1	0	1	1	1	0.83747927	0.16252073	1	0.83747927	0.911552347	0.983355526	0.016644474	0.956717764	0.893097643	0.92381367
373	1	0	1	1	1	0.83747927	0.16252073	1	0.83747927	0.911552347	0.983355526	0.016644474	0.956717764	0.893097643	0.92381367
373	1	0	1	1	1	0.83747927	0.16252073	1	0.83747927	0.911552347	0.983355526	0.016644474	0.956717764	0.893097643	0.92381367
373	1	0	1	1	1	0.83747927	0.16252073	1	0.83747927	0.911552347	0.983355526	0.016644474	0.956717764	0.893097643	0.92381367
373	1	0	1	1	1	0.83747927	0.16252073	1	0.83747927	0.911552347	0.983355526	0.016644474	0.956717764	0.893097643	0.92381367
373	1	0	1	1	1	0.83747927	0.16252073	1	0.83747927	0.911552347	0.983355526	0.016644474	0.956717764	0.893097643	0.92381367
373	1	0	1	1	1	0.83747927	0.16252073	1	0.83747927	0.911552347	0.983355526	0.016644474	0.956717764	0.893097643	0.92381367
373	1	0	1	1	1	0.83747927	0.16252073	1	0.83747927	0.911552347	0.983355526	0.016644474	0.956717764	0.893097643	0.92381367
373	1	0	1	1	1	0.83747927	0.16252073	1	0.83747927	0.911552347	0.983355526	0.016644474	0.956717764	0.893097643	0.92381367
373	1	0	1	1	1	0.83747927	0.16252073	1	0.83747927	0.911552347	0.983355526	0.016644474	0.956717764	0.893097643	0.92381367
373	1	0	1	1	1	0.83747927	0.16252073	1	0.83747927	0.911552347	0.983355526	0.016644474	0.956717764	0.893097643	0.92381367
373	1	0	1	1	1	0.83747927	0.16252073	1	0.83747927	0.911552347	0.983355526	0.016644474	0.956717764	0.893097643	0.92381367
373	1	0	1	1	1	0.83747927	0.16252073	1	0.83747927	0.911552347	0.983355526	0.016644474	0.956717764	0.893097643	0.92381367
373	1	0	1	1	1	0.83747927	0.16252073	1	0.83747927	0.911552347	0.983355526	0.016644474	0.956717764	0.893097643	0.92381367
373	1	0	1	1	1	0.83747927	0.16252073	1	0.83747927	0.911552347	0.983355526	0.016644474	0.956717764	0.893097643	0.92381367
373	1	0	1	1	1	0.83747927	0.16252073	1	0.83747927	0.911552347	0.983355526	0.016644474	0.956717764	0.893097643	0.92381367
373	1	0	1	1	1	0.83747927	0.16252073	1	0.83747927	0.911552347	0.983355526	0.016644474	0.956717764	0.893097643	0.92381367
373	1	0	1	1	1	0.83747927	0.16252073	1	0.83747927	0.911552347	0.983355526	0.016644474	0.956717764	0.893097643	0.92381367
373	1	0	1	1	1	0.83747927	0.16252073	1	0.83747927	0.911552347	0.983355526	0.016644474	0.956717764	0.893097643	0.92381367
373	1	0	1	1	1	0.83747927	0.16252073	1	0.83747927	0.911552347	0.983355526	0.016644474	0.956717764	0.893097643	0.92381367
373	1	0	1	1	1	0.83747927	0.16252073	1	0.83747927	0.911552347	0.983355526	0.016644474	0.956717764	0.893097643	0.92381367
373	1	0	1	1	1	0.83747927	0.16252073	1	0.83747927	0.911552347	0.983355526	0.016644474	0.956717764	0.893097643	0.92381367
373	1	0	1	1	1	0.83747927	0.16252073	1	0.83747927	0.911552347	0.983355526	0.016644474	0.956717764	0.893097643	0.92381367
373	1	0	1	1	1	0.83747927	0.16252073	1	0.83747927	0.911552347	0.983355526	0.016644474	0.956717764	0.893097643	0.92381367
373	1	0	1	1	1	0.83747927	0.16252073	1	0.83747927	0.911552347	0.983355526	0.016644474	0.956717764	0.893097643	0.92381367
373	1	0	1	1	1	0.83747927	0.16252073	1	0.83747927	0.911552347	0.983355526	0.016644474	0.956717764	0.893097643	0.92381367
373	1	0	1	1	1	0.83747927	0.16252073	1	0.83747927	0.911552347	0.983355526	0.016644474	0.956717764	0.893097643	0.92381367
373	1	0	1	1	1	0.83747927	0.16252073	1	0.83747927	0.911552347	0.983355526	0.016644474	0.956717764	0.893097643	0.92381367
373	1	0	1	1	1	0.83747927	0.16252073	1	0.83747927	0.911552347	0.983355526	0.016644474	0.956717764	0.893097643	0.92381367
373	1	0	1	1	1	0.83747927	0.16252073	1	0.83747927	0.911552347	0.983355526	0.016644474	0.956717764	0.893097643	0.92381367
373	1	0	1	1	1	0.83747927	0.16252073	1	0.83747927	0.911552347	0.983355526	0.016644474	0.956717764	0.893097643	0.92381367
373	1	0	1	1	1	0.83747927	0.16252073	1	0.83747927	0.911552347	0.983355526	0.016644474	0.956717764	0.893097643	0.92381367
373	1	0	1	1	1	0.83747927	0.16252073	1	0.83747927	0.911552347	0.983355526	0.016644474	0.956717764	0.893097643	0.92381367
373	1	0	1	1	1	0.83747927	0.16252073	1	0.83747927	0.911552347	0.983355526	0.016644474	0.956717764	0.893097643	0.92381367
373	1	0	1	1	1	0.83747927	0.16252073	1	0.83747927	0.911552347	0.983355526	0.016644474	0.956717764	0.893097643	0.92381367
373	1	0	1	1	1	0.83747927	0.16252073	1	0.83747927	0.911552347	0.983355526	0.016644474	0.956717764	0.893097643	0.92381367
373	1	0	1	1	1	0.83747927	0.16252073	1	0.83747927	0.911552347	0.983355526	0.016644474	0.956717764	0.893097643	0.92381367
373	1	0	1	1	1	0.83747927	0.16252073	1	0.83747927	0.911552347	0.983355526	0.016644474	0.956717764	0.893097643	0.92381367
373	1	0	1	1	1	0.83747927	0.16252073	1	0.83747927	0.911552347	0.983355526	0.016644474	0.956717764	0.893097643	0.92381367
373	1	0	1	1	1	0.83747927	0.16252073	1	0.83747927	0.911552347	0.983355526	0.016644474	0.956717764	0.893097643	0.92381367
373	1	0	1	1	1	0.83747927	0.16252073	1	0.83747927	0.911552347	0.983355526	0.016644474	0.956717764	0.893097643	0.92381367
373	1	0	1	1	1	0.83747927	0.16252073	1	0.83747927	0.911552347	0.983355526	0.016644474	0.956717764	0.893097643	0.92381367
373	1	0	1	1	1	0.83747927	0.16252073	1	0.83747927	0.911552347	0.983355526	0.016644474	0.956717764	0.893097643	0.92381367
373	1	0	1	1	1	0.83747927	0.16252073	1	0.83747927	0.911552347	0.983355526	0.016644474	0.956717764	0.893097643	0.92381367
373	1	0	1	1	1	0.83747927	0.16252073	1	0.83747927	0.911552347	0.983355526	0.016644474	0.956717764	0.893097643	0.92381367
373	1	0	1	1	1	0.83747927	0.16252073	1	0.83747927	0.911552347	0.983355526	0.016644474	0.956717764	0.893097643	0.92381367
373	1	0	1	1	1	0.83747927	0.16252073	1	0.83747927	0.911552347	0.983355526	0.016644474	0.956717764	0.893097643	0.92381367
373	1	0	1	1	1	0.83747927	0.16252073	1	0.83747927	0.911552347	0.983355526	0.016644474	0.956717764	0.893097643	0.92381367
373	1	0	1	1	1	0.83747927	0.16252073	1	0.83747927	0.911552347	0.983355526	0.016644474	0.956717764	0.893097643	0.92381367
373	1	0	1	1	1	0.83747927	0.16252073	1	0.83747927	0.911552347	0.983355526	0.016644474	0.956717764	0.893097643	0.92381367
373	1	0	1	1	1	0.83747927	0.16252073	1	0.83747927	0.911552347	0.983355526	0.016644474	0.956717764	0.893097643	0.92381367
373	1	0	1	1	1	0.83747927	0.16252073	1	0.83747927	0.911552347	0.983355526	0.016644474	0.956717764	0.893097643	0.92381367
373	1	0	1	1	1	0.83747927	0.16252073	1	0.83747927	0.911552347	0.983355526	0.016644474	0.956717764	0.893097643	0.92381367
373	1	0	1	1	1	0.83747927	0.16252073	1	0.83747927	0.911552347	0.983355526	0.016644474	0.956717764	0.893097643	0.92381367
373	1	0	1	1	1	0.83747927	0.16252073	1	0.83747927	0.911552347	0.983355526	0.016644474	0.956717764	0.893097643	0.92381367
373	1	0	1	1	1	0.83747927	0.16252073	1	0.83747927	0.911552347	0.983355526	0.016644474	0.956717764	0.893097643	0.92381367
373	1	0	1	1	1	0.83747927	0.16252073	1	0.83747927	0.911552347	0.983355526	0.016644474	0.956717764	0.893097643	0.92381367
373	1	0	1	1	1	0.83747927	0.16252073	1	0.83747927	0.911552347	0.983355526	0.016644474	0.956717764	0.893097643	0.92381367
373	1	0	1	1	1	0.83747927	0.16252073	1	0.83747927	0.911552347	0.983355526	0.016644474	0.956717764	0.893097643	0.92381367
373	1	0	1	1	1	0.83747927	0.16252073	1	0.83747927	0.911552347	0.983355526	0.016644474	0.956717764	0.893097643	0.92381367
373	1	0	1	1	1	0.83747927	0.16252073	1	0.83747927	0.911552347	0.983355526	0.016644474	0.956717764	0.893097643	0.92381367
373	1	0	1	1	1	0.83747927	0.16252073	1	0.83747927	0.911552347	0.983355526	0.016644474	0.956717764	0.893097643	0.92381367
373	1	0	1	1	1	0.83747927	0.16252073	1	0.83747927	0.911552347	0.983355526	0.016644474	0.956717764	0.893097643	0.92381367
373	1	0	1	1	1	0.83747927	0.16252073	1	0.83747927	0.911552347	0.983355526	0.016644474	0.956717764	0.893097643	0.92381367
373	1	0	1	1	1	0.83747927	0.16252073	1	0.83747927	0.911552347	0.983355526	0.016644474	0.956717764	0.893097643	0.92381367
373	1	0	1	1	1	0.83747927	0.16252073	1	0.83747927	0.911552347	0.983355526	0.016644474	0.956717764	0.893097643	0.92381367
373	1	0	1	1	1	0.83747927	0.16252073	1	0.83747927	0.911552347	0.983355526	0.016644474	0.956717764	0.893097643	0.92381367
373	1	0	1	1	1	0.83747927	0.16252073	1	0.83747927	0.911552347	0.983355526	0.016644474	0.956717764	0.893097643	0.92381367
373	1	0	1	1	1	0.83747927	0.16252073	1	0.83747927	0.911552347	0.983355526	0.016644474	0.956717764	0.893097643	0.92381367
373	1	0	1	1	1	0.83747927	0.16252073	1	0.83747927	0.911552347	0.983355526	0.016644474	0.956717764	0.893097643	0.92381367
373	1	0	1	1	1	0.83747927	0.16252073	1	0.83747927	0.911552347	0.983355526	0.016644474	0.956717764	0.893097643	0.92381367
373	1	0	1	1	1	0.83747927	0.16252073	1	0.83747927	0.911552347	0.983355526	0.016644474	0.956717764	0.893097643	0.92381367
373	1	0	1	1	1	0.83747927	0.16252073	1	0.83747927	0.911552347	0.983355526	0.016644474	0.956717764	0.893097643	0.92381367
373	1	0	1	1	1	0.83747927	0.16252073	1	0.83747927	0.911552347	0.983355526	0.016644474	0.956717764	0.893097643	0.92381367
373	1	0	1	1	1	0.83747927	0.16252073	1	0.83747927	0.911552347	0.983355526	0.016644474	0.956717764	0.893097643	0.92381367
373	1	0	1	1	1	0.83747927	0.16252073	1	0.83747927	0.911552347	0.983355526	0.016644474	0.956717764	0.893097643	0.92381367
373	1	0	1	1	1	0.83747927	0.16252073	1	0.83747927	0.911552347	0.983355526	0.016644474	0.956717764	0.893097643	0.92381367
373	1	0	1	1	1	0.83747927	0.16252073	1	0.83747927	0.911552347	0.983355526	0.016644474	0.956717764	0.893097643	0.92381367
373	1	0	1	1	1	0.83747927	0.16252073	1	0.83747927	0.911552347	0.983355526	0.016644474	0.956717764	0.893097643	0.92381367
373	1	0	1	1	1	0.83747927	0.16252073	1	0.83747927	0.911552347	0.983355526	0.016644474	0.956717764	0.893097643	0.92381367
373	1	0	1	1	1	0.83747927	0.16252073	1	0.83747927	0.911552347	0.983355526	0.016644474	0.956717764	0.893097643	0.92381367
373	1	0	1	1	1	0.83747927	0.16252073	1	0.83747927	0.911552347	0.983355526	0.016644474	0.956717764	0.893097643	0.92381367
373	1	0	1	1	1	0.83747927	0.16252073	1	0.83747927	0.911552347	0.983355526	0.016644474	0.956717764	0.893097643	0.92381367
373	1	0	1	1	1	0.83747927	0.16252073	1	0.83747927	0.911552347	0.983355526	0.016644474	0.956717764	0.893097643	0.92381367
373	1	0	1	1	1	0.83747927	0.16252073	1	0.83747927	0.911552347	0.983355526	0.016644474	0.956717764	0.893097643	0.92381367
373	1	0	1	1	1	0.83747927	0.16252073	1	0.83747927	0.911552347	0.983355526	0.016644474	0.956717764	0.893097643	0.92381367
373	1	0	1	1	1	0.83747927	0.16252073	1	0.83747927	0.911552347	0.983355526	0.016644474	0.956717764	0.893097643	0.92381367
373	1	0	1	1	1	0.83747927	0.16252073	1	0.83747927	0.911552347	0.983355526	0.016644474	0.956717764	0.893097643	0.92381367
373	1	0	1	1	1	0.83747927	0.16252073	1	0.83747927	0.911552347	0.983355526	0.016644474	0.956717764	0.893097643	0.92381367
373	1	0	1	1	1	0.83747927	0.16252073	1	0.83747927	0.911552347	0.983355526	0.016644474	0.956717764	0.893097643	0.92381367
373	1	0	1	1	1	0.83747927	0.16252073	1	0.83747927	0.911552347	0.983355526	0.016644474	0.956717764	0.893097643	0.92381367
373	1	0	1	1	1	0.83747927	0.16252073	1	0.83747927	0.911552347	0.983355526	0.016644474	0.956717764	0.893097643	0.92381367
373	1	0	1	1	1	0.83747927	0.16252073	1	0.83747927	0.911552347	0.983355526	0.016644474	0.956717764	0.893097643	0.92381367
373	1	0	1	1	1	0.83747927	0.16252073	1	0.83747927	0.911552347	0.983355526	0.016644474	0.956717764	0.893097643	0.92381367
373	1	0	1	1	1	0.83747927	0.16252073	1	0.83747927	0.911552347	0.983355526	0.016644474	0.956717764	0.893097643	0.92381367
373	1	0	1	1	1	0.83747927	0.16252073	1	0.83747927	0.911552347	0.983355526	0.016644474	0.956717764	0.893097643	0.92381367
373	1	0	1	1	1	0.83747927	0.16252073	1	0.83747927	0.911552347	0.983355526	0.016644474	0.956717764	0.893097643	0.92381367
373	1	0	1	1	1	0.83747927	0.16252073	1	0.83747927	0.911552347	0.983355526	0.016644474	0.956717764	0.893097643	0.92381367
373	1	0	1	1	1	0.83747927	0.16252073	1	0.83747927	0.911552347	0.983355526	0.016644474	0.956717764	0.893097643	0.92381367
373	1	0	1	1	1	0.83747927	0.16252073	1	0.83747927	0.911552347	0.983355526	0.016644474	0.956717764	0.893097643	0.92381367
373	1	0	1	1	1	0.83747927	0.16252073	1	0.83747927	0.911552347	0.983355526	0.016644474	0.956717764	0.893097643	0.92381367
373	1	0	1	1	1	0.83747927	0.16252073	1	0.83747927	0.911552347	0.983355526	0.016644474	0.956717764	0.893097643	0.92381367
373	1	0	1	1	1	0.83747927	0.16252073	1	0.83747927	0.911552347	0.983355526	0.016644474	0.956717764	0.893097643	0.92381367
373	1	0	1	1	1	0.83747927	0.16252073	1	0.83747927	0.911552347	0.983355526	0.016644474	0.956717764	0.893097643	0.92381367
373	1	0	1	1	1	0.83747927	0.16252073	1	0.83747927	0.911552347	0.983355526	0.016644474	0.956717764	0.893097643	0.92381367
373	1	0	1	1	1	0.83747927	0.16252073	1	0.83747927	0.911552347	0.983355526	0.016644474	0.956717764	0.893097643	0.92381367
373	1	0	1	1	1	0.83747927	0.16252073	1	0.83747927	0.911552347	0.983355526	0.016644474	0.956717764	0.893097643	0.92381367
373	1	0	1	1	1	0.83747927	0.16252073	1	0.83747927	0.911552347	0.983355526	0.016644474	0.956717764	0.893097643	0.92381367
373	1	0	1	1	1	0.83747927	0.16252073	1	0.83747927	0.911552347	0.983355526	0.016644474	0.956717764	0.893097643	0.92381367
373	1	0	1	1	1	0.83747927	0.16252073	1	0.83747927	0.911552347	0.983355526	0.016644474	0.956717764	0.893097643	0.92381367
373	1	0	1	1	1	0.83747927	0.16252073	1	0.83747927	0.911552347	0.983355526	0.016644474	0.956717764	0.893097643	0.92381367
373	1	0	1	1	1	0.83747927	0.16252073	1	0.83747927	0.911552347	0.983355526	0.016644474	0.956717764	0.893097643	0.92381367
373	1	0	1	1	1	0.83747927	0.16252073	1	0.83747927	0.911552347	0.983355526	0.016644474	0.956717764	0.893097643	0.92381367
373	1	0	1	1	1	0.83747927	0.16252073	1	0.83747927	0.911552347	0.983355526	0.016644474	0.956717764	0.893097643	0.92381367
373	1	0	1	1	1	0.83747927	0.16252073	1	0.83747927	0.911552347	0.983355526	0.016644474	0.956717764	0.893097643	0.92381367
373	1	0	1	1	1	0.83747927	0.16252073	1	0.83747927	0.911552347	0.983355526	0.016644474	0.956717764	0.893097643	0.92381367
373	1	0	1	1	1	0.83747927	0.16252073	1	0.83747927	0.911552347	0.983355526	0.016644474	0.956717764	0.893097643	0.92381367
373	1	0	1	1	1	0.83747927	0.16252073	1	0.83747927	0.911552347	0.983355526	0.016644474	0.956717764	0.893097643	0.92381367
373	1	0	1	1	1	0.83747927	0.16252073	1	0.83747927	0.911552347	0.983355526	0.016644474	0.956717764	0.893097643	0.92381367
373	1	0	1	1	1	0.83747927	0.16252073	1	0.83747927	0.911552347	0.983355526	0.016644474	0.956717764	0.893097643	0.92381367
373	1	0	1	1	1	0.83747927	0.16252073	1	0.83747927	0.911552347	0.983355526	0.016644474	0.956717764	0.893097643	0.92381367
373	1	0	1	1	1	0.83747927	0.16252073	1	0.83747927	0.911552347	0.983355526	0.016644474	0.956717764	0.893097643	0.92381367
373	1	0	1	1	1	0.83747927	0.16252073	1	0.83747927	0.911552347	0.983355526	0.016644474	0.956717764	0.893097643	0.92381367
373	1	0	1	1	1	0.83747927	0.16252073	1	0.83747927	0.911552347	0.983355526	0.016644474	0.956717764	0.893097643	0.92381367
373	1	0	1	1	1	0.83747927	0.16252073	1	0.83747927	0.911552347	0.983355526	0.016644474	0.956717764	0.893097643	0.92381367
373	1	0	1	1	1	0.83747927	0.16252073	1	0.83747927	0.911552347	0.983355526	0.016644474	0.956717764	0.893097643	0.92381367
373	1	0	1	1	1	0.83747927	0.16252073	1	0.83747927	0.911552347	0.983355526	0.016644474	0.956717764	0.893097643	0.92381367
373	1	0	1	1	1	0.83747927	0.16252073	1	0.83747927	0.911552347	0.983355526	0.016644474	0.956717764	0.893097643	0.92381367
373	1	0	1	1	1	0.83747927	0.16252073	1	0.83747927	0.911552347	0.983355526	0.016644474	0.956717764	0.893097643	0.92381367
373	1	0	1	1	1	0.83747927	0.16252073	1	0.83747927	0.911552347	0.983355526	0.016644474	0.956717764	0.893097643	0.92381367
373	1	0	1	1	1	0.83747927	0.16252073	1	0.83747927	0.911552347	0.983355526	0.016644474	0.956717764	0.893097643	0.92381367
373	1	0	1	1	1	0.83747927	0.16252073	1	0.83747927	0.911552347	0.983355526	0.016644474	0.956717764	0.893097643	0.92381367
373	1	0	1	1	1	0.83747927	0.16252073	1	0.83747927	0.911552347	0.983355526	0.016644474	0.956717764	0.893097643	0.92381367
373	1	0	1	1	1	0.83747927	0.16252073	1	0.83747927	0.911552347	0.983355526	0.016644474	0.956717764	0.893097643	0.92381367
373	1	0	1	1	1	0.83747927	0.16252073	1	0.83747927	0.911552347	0.983355526	0.016644474	0.956717764	0.893097643	0.92381367
373	1	0	1	1	1	0.83747927	0.16252073	1	0.83747927	0.911552347	0.983355526	0.016644474	0.956717764	0.893097643	0.92381367
373	1	0	1	1	1	0.83747927	0.16252073	1	0.83747927	0.911552347	0.983355526	0.016644474	0.956717764	0.893097643	0.92381367
373	1	0	1	1	1	0.83747927	0.16252073	1	0.83747927	0.911552347	0.983355526	0.016644474	0.956717764	0.893097643	0.92381367
373	1	0	1	1	1	0.83747927	0.16252073	1	0.83747927	0.911552347	0.983355526	0.016644474	0.956717764	0.893097643	0.92381367
373	1	0	1	1	1	0.83747927	0.16252073	1	0.83747927	0.911552347	0.983355526	0.016644474	0.956717764	0.893097643	0.92381367
373	1	0	1	1	1	0.83747927	0.16252073	1	0.83747927	0.911552347	0.983355526	0.016644474	0.956717764	0.893097643	0.92381367
373	1	0	1	1	1	0.83747927	0.16252073	1	0.83747927	0.911552347	0.983355526	0.016644474	0.956717764	0.893097643	0.92381367
373	1	0	1	1	1	0.83747927	0.16252073	1	0.83747927	0.911552347	0.983355526	0.016644474	0.956717764	0.893097643	0.92381367
373	1	0	1	1	1	0.83747927	0.16252073	1	0.83747927	0.911552347	0.983355526	0.016644474	0.956717764	0.893097643	0.92381367
373	1	0	1	1	1	0.83747927	0.16252073	1	0.83747927	0.911552347	0.983355526	0.016644474	0.956717764	0.893097643	0.92381367
373	1	0	1	1	1	0.83747927	0.16252073	1	0.83747927	0.911552347	0.983355526	0.016644474	0.956717764	0.893097643	0.92381367
373	1	0	1	1	1	0.83747927	0.16252073	1	0.83747927	0.911552347	0.983355526	0.016644474	0.956717764	0.893097643	0.92381367
373	1	0	1	1	1	0.83747927	0.16252073	1	0.83747927	0.911552347	0.983355526	0.016644474	0.956717764	0.893097643	0.92381367
373	1	0	1	1	1	0.83747927	0.16252073	1	0.83747927	0.911552347	0.983355526	0.016644474	0.956717764	0.893097643	0.92381367
373	1	0	1	1	1	0.83747927	0.16252073	1	0.83747927	0.911552347	0.983355526	0.016644474	0.956717764	0.893097643	0.92381367
373	1	0	1	1	1	0.83747927	0.16252073	1	0.83747927	0.911552347	0.983355526	0.016644474	0.956717764	0.893097643	0.92381367
373	1	0	1	1	1	0.83747927	0.16252073	1	0.83747927	0.911552347	0.983355526	0.016644474	0.956717764	0.893097643	0.92381367
373	1	0	1	1	1	0.83747927	0.16252073	1	0.83747927	0.911552347	0.983355526	0.016644474	0.956717764	0.893097643	0.92381367
373	1	0	1	1	1	0.83747927	0.16252073	1	0.83747927	0.911552347	0.983355526	0.016644474	0.956717764	0.893097643	0.92381367
373	1	0	1	1	1	0.83747927	0.16252073	1	0.83747927	0.911552347	0.983355526	0.016644474	0.956717764	0.893097643	0.92381367
373	1	0	1	1	1	0.83747927	0.16252073	1	0.83747927	0.911552347	0.983355526	0.016644474	0.956717764	0.893097643	0.92381367
373	1	0	1	1	1	0.83747927	0.16252073	1	0.83747927	0.911552347	0.983355526	0.016644474	0.956717764	0.893097643	0.92381367
373	1	0	1	1	1	0.83747927	0.16252073	1	0.83747927	0.911552347	0.983355526	0.016644474	0.956717764	0.893097643	0.92381367
373	1	0	1	1	1	0.83747927	0.16252073	1	0.83747927	0.911552347	0.983355526	0.016644474	0.956717764	0.893097643	0.92381367
373	1	0	1	1	1	0.83747927	0.16252073	1	0.83747927	0.911552347	0.983355526	0.016644474	0.956717764	0.893097643	0.92381367
373	1	0	1	1	1	0.83747927	0.16252073	1	0.83747927	0.911552347	0.983355526	0.016644474	0.956717764	0.893097643	0.92381367
373	1	0	1	1	1	0.83747927	0.16252073	1	0.83747927	0.911552347	0.983355526	0.016644474	0.956717764	0.893097643	0.92381367
373	1	0	1	1	1	0.83747927	0.16252073	1	0.83747927	0.911552347	0.983355526	0.016644474	0.956717764	0.893097643	0.92381367
373	1	0	1	1	1	0.83747927	0.16252073	1	0.83747927	0.911552347	0.983355526	0.016644474	0.956717764	0.893097643	0.92381367
373	1	0	1	1	1	0.83747927	0.16252073	1	0.83747927	0.911552347	0.983355526	0.016644474	0.956717764	0.893097643	0.92381367
373	1	0	1	1	1	0.83747927	0.16252073	1	0.83747927	0.911552347	0.983355526	0.016644474	0.956717764	0.893097643	0.92381367
373	1	0	1	1	1	0.83747927	0.16252073	1	0.83747927	0.911552347	0.983355526	0.016644474	0.956717764	0.893097643	0.92381367
373	1	0	1	1	1	0.83747927	0.16252073	1	0.83747927	0.911552347	0.983355526	0.016644474	0.956717764	0.893097643	0.92381367
373	1	0	1	1	1	0.83747927	0.16252073	1	0.83747927	0.911552347	0.983355526	0.016644474	0.956717764	0.893097643	0.92381367
373	1	0	1	1	1	0.83747927	0.16252073	1	0.83747927	0.911552347	0.983355526	0.016644474	0.956717764	0.893097643	0.92381367
373	1	0	1	1	1	0.83747927	0.16252073	1	0.83747927	0.911552347	0.983355526	0.016644474	0.956717764	0.893097643	0.92381367
373	1	0	1	1	1	0.83747927	0.16252073	1	0.83747927	0.911552347	0.983355526	0.016644474	0.956717764	0.893097643	0.92381367
373	1	0	1	1	1	0.83747927	0.16252073	1	0.83747927	0.911552347	0.983355526	0.016644474	0.956717764	0.893097643	0.92381367
373	1	0	1	1	1	0.83747927	0.16252073	1	0.83747927	0.911552347	0.983355526	0.016644474	0.956717764	0.893097643	0.92381367
373	1	0	1	1	1	0.83747927	0.16252073	1	0.83747927	0.911552347	0.983355526	0.016644474	0.956717764	0.893097643	0.92381367
373	1	0	1	1	1	0.83747927	0.16252073	1	0.83747927	0.911552347	0.983355526	0.016644474	0.956717764	0.893097643	0.92381367
373	1	0	1	1	1	0.83747927	0.16252073	1	0.83747927	0.911552347	0.983355526	0.016644474	0.956717764	0.893097643	0.92381367
373	1	0	1	1	1	0.83747927	0.16252073	1	0.83747927	0.911552347	0.983355526	0.016644474	0.956717764	0.893097643	0.92381367
373	1	0	1	1	1	0.83747927	0.16252073	1	0.83747927	0.911552347	0.983355526	0.016644474	0.956717764	0.893097643	0.92381367
373	1	0	1	1	1	0.83747927	0.16252073	1	0.83747927	0.911552347	0.983355526	0.016644474	0.956717764	0.893097643	0.92381367
373	1	0	1	1	1	0.83747927	0.16252073	1	0.83747927	0.911552347	0.983355526	0.016644474	0.956717764	0.893097643	0.92381367
373	1	0	1	1	1	0.83747927	0.16252073	1	0.83747927	0.911552347	0.983355526	0.016644474	0.956717764	0.893097643	0.92381367
373	1	0	1	1	1	0.83747927	0.16252073	1	0.83747927	0.911552347	0.983355526	0.016644474	0.956717764	0.893097643	0.92381367
373	1	0	1	1	1	0.83747927	0.16252073	1	0.83747927	0.911552347	0.983355526	0.016644474	0.956717764	0.893097643	0.92381367
373	1	0	1	1	1	0.83747927	0.16252073	1	0.83747927	0.911552347	0.983355526	0.016644474	0.956717764	0.893097643	0.92381367
373	1	0	1	1	1	0.83747927	0.16252073	1	0.83747927	0.911552347	0.983355526	0.016644474	0.956717764	0.893097643	0.92381367
373	1	0	1	1	1	0.83747927	0.16252073	1	0.83747927	0.911552347	0.983355526	0.016644474	0.956717764	0.893097643	0.92381367
373	1	0	1	1	1	0.83747927	0.16252073	1	0.83747927	0.911552347	0.983355526	0.016644474	0.956717764	0.893097643	0.92381367
373	1	0	1	1	1	0.83747927	0.16252073	1	0.83747927	0.911552347	0.983355526	0.016644474	0.956717764	0.893097643	0.92381367
373	1	0	1	1	1	0.83747927	0.16252073	1	0.83747927	0.911552347	0.983355526	0.016644474	0.956717764	0.893097643	0.92381367
373	1	0	1	1	1	0.83747927	0.16252073	1	0.83747927	0.911552347	0.983355526	0.016644474	0.956717764	0.893097643	0.92381367
373	1	0	1	1	1	0.83747927	0.16252073	1	0.83747927	0.911552347	0.983355526	0.016644474	0.956717764	0.893097643	0.92381367
373	1	0	1	1	1	0.83747927	0.16252073	1	0.83747927	0.911552347	0.983355526	0.016644474	0.956717764	0.893097643	0.92381367
373	1	0	1	1	1	0.83747927	0.16252073	1	0.83747927	0.911552347	0.983355526	0.016644474	0.956717764	0.893097643	0.92381367
373	1	0	1	1	1	0.83747927	0.16252073	1	0.83747927	0.911552347	0.983355526	0.016644474	0.956717764	0.893097643	0.92381367
373	1	0	1	1	1	0.83747927	0.16252073	1	0.83747927	0.911552347	0.983355526	0.016644474	0.956717764	0.893097643	0.92381367
373	1	0	1	1	1	0.83747927	0.16252073	1	0.83747927	0.911552347	0.983355526	0.016644474	0.956717764	0.893097643	0.92381367
373	1	0	1	1	1	0.83747927	0.16252073	1	0.83747927	0.911552347	0.983355526	0.016644474	0.956717764	0.893097643	0.92381367
373	1	0	1	1	1	0.83747927	0.16252073	1	0.83747927	0.911552347	0.983355526	0.016644474	0.956717764	0.893097643	0.92381367
373	1	0	1	1	1	0.83747927	0.16252073	1	0.83747927	0.911552347	0.983355526	0.016644474	0.956717764	0.893097643	0.92381367
373	1	0	1	1	1	0.83747927	0.16252073	1	0.83747927	0.911552347	0.983355526	0.016644474	0.956717764	0.893097643	0.92381367
373	1	0	1	1	1	0.83747927	0.16252073	1	0.83747927	0.911552347	0.983355526	0.016644474	0.956717764	0.893097643	0.92381367
373	1	0	1	1	1	0.83747927	0.16252073	1	0.83747927	0.911552347	0.983355526	0.016644474	0.956717764	0.893097643	0.92381367
373	1	0	1	1	1	0.83747927	0.16252073	1	0.83747927	0.911552347	0.983355526	0.016644474	0.956717764	0.893097643	0.92381367
373	1	0	1	1	1	0.83747927	0.16252073	1	0.83747927	0.911552347	0.983355526	0.016644474	0.956717764	0.893097643	0.92381367
373	1	0	1	1	1	0.83747927	0.16252073	1	0.83747927	0.911552347	0.983355526	0.016644474	0.956717764	0.893097643	0.92381367
373	1	0	1	1	1	0.83747927	0.16252073	1	0.83747927	0.911552347	0.983355526	0.016644474	0.956717764	0.893097643	0.92381367
373	1	0	1	1	1	0.83747927	0.16252073	1	0.83747927	0.911552347	0.983355526	0.016644474	0.956717764	0.893097643	0.92381367
373	1	0	1	1	1	0.83747927	0.16252073	1	0.83747927	0.911552347	0.983355526	0.016644474	0.956717764	0.893097643	0.92381367
373	1	0	1	1	1	0.83747927	0.16252073	1	0.83747927	0.911552347	0.983355526	0.016644474	0.956717764	0.893097643	0.92381367
373	1	0	1	1	1	0.83747927	0.16252073	1	0.83747927	0.911552347	0.983355526	0.016644474	0.956717764	0.893097643	0.92381367
373	1	0	1	1	1	0.83747927	0.16252073	1	0.83747927	0.911552347	0.983355526	0.016644474	0.956717764	0.893097643	0.92381367
373	1	0	1	1	1	0.83747927	0.16252073	1	0.83747927	0.911552347	0.983355526	0.016644474	0.956717764	0.893097643	0.92381367
373	1	0	1	1	1	0.83747927	0.16252073	1	0.83747927	0.911552347	0.983355526	0.016644474	0.956717764	0.893097643	0.92381367
373	1	0	1	1	1	0.83747927	0.16252073	1	0.83747927	0.911552347	0.983355526	0.016644474	0.956717764	0.893097643	0.92381367
373	1	0	1	1	1	0.83747927	0.16252073	1	0.83747927	0.911552347	0.983355526	0.016644474	0.956717764	0.893097643	0.92381367
373	1	0	1	1	1	0.83747927	0.16252073	1	0.83747927	0.911552347	0.983355526	0.016644474	0.956717764	0.893097643	0.92381367
373	1	0	1	1	1	0.83747927	0.16252073	1	0.83747927	0.911552347	0.983355526	0.016644474	0.956717764	0.893097643	0.92381367
373	1	0	1	1	1	0.83747927	0.16252073	1	0.83747927	0.911552347	0.983355526	0.016644474	0.956717764	0.893097643	0.92381367
373	1	0	1	1	1	0.83747927	0.16252073	1	0.83747927	0.911552347	0.983355526	0.016644474	0.956717764	0.893097643	0.92381367
373	1	0	1	1	1	0.83747927	0.16252073	1	0.83747927	0.911552347	0.983355526	0.016644474	0.956717764	0.893097643	0.92381367
373	1	0	1	1	1	0.83747927	0.16252073	1	0.83747927	0.911552347	0.983355526	0.016644474	0.956717764	0.893097643	0.92381367
373	1	0	1	1	1	0.83747927	0.16252073	1	0.83747927	0.911552347	0.983355526	0.016644474	0.956717764	0.893097643	0.92381367
373	1	0	1	1	1	0.83747927	0.16252073	1	0.83747927	0.911552347	0.983355526	0.016644474	0.956717764	0.893097643	0.92381367
373	1	0	1	1	1	0.83747927	0.16252073	1	0.83747927	0.911552347	0.983355526	0.016644474	0.956717764	0.893097643	0.92381367
373	1	0	1	1	1	0.83747927	0.16252073	1	0.83747927	0.911552347	0.983355526	0.016644474	0.956717764	0.893097643	0.92381367
373	1	0	1	1	1	0.83747927	0.16252073	1	0.83747927	0.911552347	0.983355526	0.016644474	0.956717764	0.893097643	0.92381367
373	1	0	1	1	1	0.83747927	0.16252073	1	0.83747927	0.911552347	0.983355526	0.016644474	0.956717764	0.893097643	0.92381367
373	1	0	1	1	1	0.83747927	0.16252073	1	0.83747927	0.911552347	0.983355526	0.016644474	0.956717764	0.893097643	0.92381367
373	1	0	1	1	1	0.83747927	0.16252073	1	0.83747927	0.911552347	0.983355526	0.016644474	0.956717764	0.893097643	0.92381367
373	1	0	1	1	1	0.83747927	0.16252073	1	0.83747927	0.911552347	0.983355526	0.016644474	0.956717764	0.893097643	0.92381367
373	1	0	1	1	1	0.83747927	0.16252073	1	0.83747927	0.911552347	0.983355526	0.016644474	0.956717764	0.893097643	0.92381367
373	1	0	1	1	1	0.83747927	0.16252073	1	0.83747927	0.911552347	0.983355526	0.016644474	0.956717764	0.893097643	0.92381367
373	1	0	1	1	1	0.83747927	0.16252073	1	0.83747927	0.911552347	0.983355526	0.016644474	0.956717764	0.893097643	0.92381367
373	1	0	1	1	1	0.83747927	0.16252073	1	0.83747927	0.911552347	0.983355526	0.016644474	0.956717764	0.893097643	0.92381367
373	1	0	1	1	1	0.83747927	0.16252073	1	0.83747927	0.911552347	0.983355526	0.016644474	0.956717764	0.893097643	0.92381367
373	1	0	1	1	1	0.83747927	0.16252073	1	0.83747927	0.911552347	0.983355526	0.016644474	0.956717764	0.893097643	0.92381367
373	1	0	1	1	1	0.83747927	0.16252073	1	0.83747927	0.911552347	0.983355526	0.016644474	0.956717764	0.893097643	0.92381367
373	1	0	1	1	1	0.83747927	0.16252073	1	0.83747927	0.911552347	0.983355526	0.016644474	0.956717764	0.893097643	0.92381367
373	1	0	1	1	1	0.83747927	0.16252073	1	0.83747927	0.911552347	0.983355526	0.016644474	0.956717764	0.893097643	0.92381367
373	1	0	1	1	1	0.83747927	0.16252073	1	0.83747927	0.911552347	0.983355526	0.016644474	0.956717764	0.893097643	0.92381367
373	1	0	1	1	1	0.83747927	0.16252073	1	0.83747927	0.911552347	0.983355526	0.016644474	0.956717764	0.893097643	0.92381367
373	1	0	1	1	1	0.83747927	0.16252073	1	0.83747927	0.911552347	0.983355526	0.016644474	0.956717764	0.893097643	0.92381367
373	1	0	1	1	1	0.83747927	0.16252073	1	0.83747927	0.911552347	0.983355526	0.016644474	0.956717764	0.893097643	0.92381367
373	1	0	1	1	1	0.83747927	0.16252073	1	0.83747927	0.911552347	0.983355526	0.016644474	0.956717764	0.893097643	0.92381367
373	1	0	1	1	1	0.83747927	0.16252073	1	0.83747927	0.911552347	0.983355526	0.016644474	0.956717764	0.893097643	0.92381367
373	1	0	1	1	1	0.83747927	0.16252073	1	0.83747927	0.911552347	0.983355526	0.016644474	0.956717764	0.893097643	0.92381367
373	1	0	1	1	1	0.83747927	0.16252073	1	0.83747927	0.911552347	0.983355526	0.016644474	0.956717764	0.893097643	0.92381367
373	1	0	1	1	1	0.83747927	0.16252073	1	0.83747927	0.911552347	0.983355526	0.016644474	0.956717764	0.893097643	0.92381367
372	1	0	1	1	1	0.84	0.16	1	0.84	0.913043478	0.98326519	0.01673481	0.957619477	0.891687657	0.923478261
372	1	0	1	1	1	0.84	0.16	1	0.84	0.913043478	0.98326519	0.01673481	0.957619477	0.891687657	0.923478261
372	1	0	1	1	1	0.84	0.16	1	0.84	0.913043478	0.98326519	0.01673481	0.957619477	0.891687657	0.923478261
372	1	0	1	1	1	0.84	0.16	1	0.84	0.913043478	0.98326519	0.01673481	0.957619477	0.891687657	0.923478261
372	1	0	1	1	1	0.84	0.16	1	0.84	0.913043478	0.98326519	0.01673481	0.957619477	0.891687657	0.923478261
372	1	0	1	1	1	0.84	0.16	1	0.84	0.913043478	0.98326519	0.01673481	0.957619477	0.891687657	0.923478261
372	1	0	1	1	1	0.84	0.16	1	0.84	0.913043478	0.98326519	0.01673481	0.957619477	0.891687657	0.923478261
372	1	0	1	1	1	0.84	0.16	1	0.84	0.913043478	0.98326519	0.01673481	0.957619477	0.891687657	0.923478261
372	1	0	1	1	1	0.84	0.16	1	0.84	0.913043478	0.98326519	0.01673481	0.957619477	0.891687657	0.923478261
372	1	0	1	1	1	0.84	0.16	1	0.84	0.913043478	0.98326519	0.01673481	0.957619477	0.891687657	0.923478261
372	1	0	1	1	1	0.84	0.16	1	0.84	0.913043478	0.98326519	0.01673481	0.957619477	0.891687657	0.923478261
372	1	0	1	1	1	0.84	0.16	1	0.84	0.913043478	0.98326519	0.01673481	0.957619477	0.891687657	0.923478261
372	1	0	1	1	1	0.84	0.16	1	0.84	0.913043478	0.98326519	0.01673481	0.957619477	0.891687657	0.923478261
372	1	0	1	1	1	0.84	0.16	1	0.84	0.913043478	0.98326519	0.01673481	0.957619477	0.891687657	0.923478261
372	1	0	1	1	1	0.84	0.16	1	0.84	0.913043478	0.98326519	0.01673481	0.957619477	0.891687657	0.923478261
372	1	0	1	1	1	0.84	0.16	1	0.84	0.913043478	0.98326519	0.01673481	0.957619477	0.891687657	0.923478261
372	1	0	1	1	1	0.84	0.16	1	0.84	0.913043478	0.98326519	0.01673481	0.957619477	0.891687657	0.923478261
372	1	0	1	1	1	0.84	0.16	1	0.84	0.913043478	0.98326519	0.01673481	0.957619477	0.891687657	0.923478261
372	1	0	1	1	1	0.84	0.16	1	0.84	0.913043478	0.98326519	0.01673481	0.957619477	0.891687657	0.923478261
372	1	0	1	1	1	0.84	0.16	1	0.84	0.913043478	0.98326519	0.01673481	0.957619477	0.891687657	0.923478261
372	1	0	1	1	1	0.84	0.16	1	0.84	0.913043478	0.98326519	0.01673481	0.957619477	0.891687657	0.923478261
372	1	0	1	1	1	0.84	0.16	1	0.84	0.913043478	0.98326519	0.01673481	0.957619477	0.891687657	0.923478261
372	1	0	1	1	1	0.84	0.16	1	0.84	0.913043478	0.98326519	0.01673481	0.957619477	0.891687657	0.923478261
372	1	0	1	1	1	0.84	0.16	1	0.84	0.913043478	0.98326519	0.01673481	0.957619477	0.891687657	0.923478261
372	1	0	1	1	1	0.84	0.16	1	0.84	0.913043478	0.98326519	0.01673481	0.957619477	0.891687657	0.923478261
372	1	0	1	1	1	0.84	0.16	1	0.84	0.913043478	0.98326519	0.01673481	0.957619477	0.891687657	0.923478261
372	1	0	1	1	1	0.84	0.16	1	0.84	0.913043478	0.98326519	0.01673481	0.957619477	0.891687657	0.923478261
372	1	0	1	1	1	0.84	0.16	1	0.84	0.913043478	0.98326519	0.01673481	0.957619477	0.891687657	0.923478261
372	1	0	1	1	1	0.84	0.16	1	0.84	0.913043478	0.98326519	0.01673481	0.957619477	0.891687657	0.923478261
372	1	0	1	1	1	0.84	0.16	1	0.84	0.913043478	0.98326519	0.01673481	0.957619477	0.891687657	0.923478261
372	1	0	1	1	1	0.84	0.16	1	0.84	0.913043478	0.98326519	0.01673481	0.957619477	0.891687657	0.923478261
372	1	0	1	1	1	0.84	0.16	1	0.84	0.913043478	0.98326519	0.01673481	0.957619477	0.891687657	0.923478261
372	1	0	1	1	1	0.84	0.16	1	0.84	0.913043478	0.98326519	0.01673481	0.957619477	0.891687657	0.923478261
372	1	0	1	1	1	0.84	0.16	1	0.84	0.913043478	0.98326519	0.01673481	0.957619477	0.891687657	0.923478261
372	1	0	1	1	1	0.84	0.16	1	0.84	0.913043478	0.98326519	0.01673481	0.957619477	0.891687657	0.923478261
372	1	0	1	1	1	0.84	0.16	1	0.84	0.913043478	0.98326519	0.01673481	0.957619477	0.891687657	0.923478261
372	1	0	1	1	1	0.84	0.16	1	0.84	0.913043478	0.98326519	0.01673481	0.957619477	0.891687657	0.923478261
372	1	0	1	1	1	0.84	0.16	1	0.84	0.913043478	0.98326519	0.01673481	0.957619477	0.891687657	0.923478261
372	1	0	1	1	1	0.84	0.16	1	0.84	0.913043478	0.98326519	0.01673481	0.957619477	0.891687657	0.923478261
372	1	0	1	1	1	0.84	0.16	1	0.84	0.913043478	0.98326519	0.01673481	0.957619477	0.891687657	0.923478261
372	1	0	1	1	1	0.84	0.16	1	0.84	0.913043478	0.98326519	0.01673481	0.957619477	0.891687657	0.923478261
372	1	0	1	1	1	0.84	0.16	1	0.84	0.913043478	0.98326519	0.01673481	0.957619477	0.891687657	0.923478261
372	1	0	1	1	1	0.84	0.16	1	0.84	0.913043478	0.98326519	0.01673481	0.957619477	0.891687657	0.923478261
372	1	0	1	1	1	0.84	0.16	1	0.84	0.913043478	0.98326519	0.01673481	0.957619477	0.891687657	0.923478261
372	1	0	1	1	1	0.84	0.16	1	0.84	0.913043478	0.98326519	0.01673481	0.957619477	0.891687657	0.923478261
372	1	0	1	1	1	0.84	0.16	1	0.84	0.913043478	0.98326519	0.01673481	0.957619477	0.891687657	0.923478261
372	1	0	1	1	1	0.84	0.16	1	0.84	0.913043478	0.98326519	0.01673481	0.957619477	0.891687657	0.923478261
372	1	0	1	1	1	0.84	0.16	1	0.84	0.913043478	0.98326519	0.01673481	0.957619477	0.891687657	0.923478261
372	1	0	1	1	1	0.84	0.16	1	0.84	0.913043478	0.98326519	0.01673481	0.957619477	0.891687657	0.923478261
372	1	0	1	1	1	0.84	0.16	1	0.84	0.913043478	0.98326519	0.01673481	0.957619477	0.891687657	0.923478261
372	1	0	1	1	1	0.84	0.16	1	0.84	0.913043478	0.98326519	0.01673481	0.957619477	0.891687657	0.923478261
372	1	0	1	1	1	0.84	0.16	1	0.84	0.913043478	0.98326519	0.01673481	0.957619477	0.891687657	0.923478261
371	1	0	1	1	1	0.84	0.16	1	0.84	0.913043478	0.98326519	0.01673481	0.957619477	0.891687657	0.923478261
371	1	0	1	1	1	0.84	0.16	1	0.84	0.913043478	0.98326519	0.01673481	0.957619477	0.891687657	0.923478261
371	1	0	1	1	1	0.84	0.16	1	0.84	0.913043478	0.98326519	0.01673481	0.957619477	0.891687657	0.923478261
371	1	0	1	1	1	0.84	0.16	1	0.84	0.913043478	0.98326519	0.01673481	0.957619477	0.891687657	0.923478261
371	1	0	1	1	1	0.84	0.16	1	0.84	0.913043478	0.98326519	0.01673481	0.957619477	0.891687657	0.923478261
371	1	0	1	1	1	0.84	0.16	1	0.84	0.913043478	0.98326519	0.01673481	0.957619477	0.891687657	0.923478261
371	1	0	1	1	1	0.84	0.16	1	0.84	0.913043478	0.98326519	0.01673481	0.957619477	0.891687657	0.923478261
371	1	0	1	1	1	0.84	0.16	1	0.84	0.913043478	0.98326519	0.01673481	0.957619477	0.891687657	0.923478261
371	1	0	1	1	1	0.84	0.16	1	0.84	0.913043478	0.98326519	0.01673481	0.957619477	0.891687657	0.923478261
371	1	0	1	1	1	0.84	0.16	1	0.84	0.913043478	0.98326519	0.01673481	0.957619477	0.891687657	0.923478261
371	1	0	1	1	1	0.84	0.16	1	0.84	0.913043478	0.98326519	0.01673481	0.957619477	0.891687657	0.923478261
371	1	0	1	1	1	0.84	0.16	1	0.84	0.913043478	0.98326519	0.01673481	0.957619477	0.891687657	0.923478261
371	1	0	1	1	1	0.84	0.16	1	0.84	0.913043478	0.98326519	0.01673481	0.957619477	0.891687657	0.923478261
371	1	0	1	1	1	0.84	0.16	1	0.84	0.913043478	0.98326519	0.01673481	0.957619477	0.891687657	0.923478261
371	1	0	1	1	1	0.84	0.16	1	0.84	0.913043478	0.98326519	0.01673481	0.957619477	0.891687657	0.923478261
371	1	0	1	1	1	0.84	0.16	1	0.84	0.913043478	0.98326519	0.01673481	0.957619477	0.891687657	0.923478261
371	1	0	1	1	1	0.84	0.16	1	0.84	0.913043478	0.98326519	0.01673481	0.957619477	0.891687657	0.923478261
371	1	0	1	1	1	0.84	0.16	1	0.84	0.913043478	0.98326519	0.01673481	0.957619477	0.891687657	0.923478261
371	1	0	1	1	1	0.84	0.16	1	0.84	0.913043478	0.98326519	0.01673481	0.957619477	0.891687657	0.923478261
371	1	0	1	1	1	0.84	0.16	1	0.84	0.913043478	0.98326519	0.01673481	0.957619477	0.891687657	0.923478261
371	1	0	1	1	1	0.84	0.16	1	0.84	0.913043478	0.98326519	0.01673481	0.957619477	0.891687657	0.923478261
371	1	0	1	1	1	0.84	0.16	1	0.84	0.913043478	0.98326519	0.01673481	0.957619477	0.891687657	0.923478261
371	1	0	1	1	1	0.84	0.16	1	0.84	0.913043478	0.98326519	0.01673481	0.957619477	0.891687657	0.923478261
371	1	0	1	1	1	0.84	0.16	1	0.84	0.913043478	0.98326519	0.01673481	0.957619477	0.891687657	0.923478261
371	1	0	1	1	1	0.84	0.16	1	0.84	0.913043478	0.98326519	0.01673481	0.957619477	0.891687657	0.923478261
371	1	0	1	1	1	0.84	0.16	1	0.84	0.913043478	0.98326519	0.01673481	0.957619477	0.891687657	0.923478261
371	1	0	1	1	1	0.84	0.16	1	0.84	0.913043478	0.98326519	0.01673481	0.957619477	0.891687657	0.923478261
371	1	0	1	1	1	0.84	0.16	1	0.84	0.913043478	0.98326519	0.01673481	0.957619477	0.891687657	0.923478261
371	1	0	1	1	1	0.84	0.16	1	0.84	0.913043478	0.98326519	0.01673481	0.957619477	0.891687657	0.923478261
371	1	0	1	1	1	0.84	0.16	1	0.84	0.913043478	0.98326519	0.01673481	0.957619477	0.891687657	0.923478261
371	1	0	1	1	1	0.84	0.16	1	0.84	0.913043478	0.98326519	0.01673481	0.957619477	0.891687657	0.923478261
371	1	0	1	1	1	0.84	0.16	1	0.84	0.913043478	0.98326519	0.01673481	0.957619477	0.891687657	0.923478261
371	1	0	1	1	1	0.84	0.16	1	0.84	0.913043478	0.98326519	0.01673481	0.957619477	0.891687657	0.923478261
371	1	0	1	1	1	0.84	0.16	1	0.84	0.913043478	0.98326519	0.01673481	0.957619477	0.891687657	0.923478261
371	1	0	1	1	1	0.84	0.16	1	0.84	0.913043478	0.98326519	0.01673481	0.957619477	0.891687657	0.923478261
371	1	0	1	1	1	0.84	0.16	1	0.84	0.913043478	0.98326519	0.01673481	0.957619477	0.891687657	0.923478261
371	1	0	1	1	1	0.84	0.16	1	0.84	0.913043478	0.98326519	0.01673481	0.957619477	0.891687657	0.923478261
371	1	0	1	1	1	0.84	0.16	1	0.84	0.913043478	0.98326519	0.01673481	0.957619477	0.891687657	0.923478261
371	1	0	1	1	1	0.84	0.16	1	0.84	0.913043478	0.98326519	0.01673481	0.957619477	0.891687657	0.923478261
371	1	0	1	1	1	0.84	0.16	1	0.84	0.913043478	0.98326519	0.01673481	0.957619477	0.891687657	0.923478261
371	1	0	1	1	1	0.84	0.16	1	0.84	0.913043478	0.98326519	0.01673481	0.957619477	0.891687657	0.923478261
371	1	0	1	1	1	0.84	0.16	1	0.84	0.913043478	0.98326519	0.01673481	0.957619477	0.891687657	0.923478261
371	1	0	1	1	1	0.84	0.16	1	0.84	0.913043478	0.98326519	0.01673481	0.957619477	0.891687657	0.923478261
371	1	0	1	1	1	0.84	0.16	1	0.84	0.913043478	0.98326519	0.01673481	0.957619477	0.891687657	0.923478261
371	1	0	1	1	1	0.84	0.16	1	0.84	0.913043478	0.98326519	0.01673481	0.957619477	0.891687657	0.923478261
371	1	0	1	1	1	0.84	0.16	1	0.84	0.913043478	0.98326519	0.01673481	0.957619477	0.891687657	0.923478261
371	1	0	1	1	1	0.84	0.16	1	0.84	0.913043478	0.98326519	0.01673481	0.957619477	0.891687657	0.923478261
371	1	0	1	1	1	0.84	0.16	1	0.84	0.913043478	0.98326519	0.01673481	0.957619477	0.891687657	0.923478261
371	1	0	1	1	1	0.84	0.16	1	0.84	0.913043478	0.98326519	0.01673481	0.957619477	0.891687657	0.923478261
371	1	0	1	1	1	0.84	0.16	1	0.84	0.913043478	0.98326519	0.01673481	0.957619477	0.891687657	0.923478261
371	1	0	1	1	1	0.84	0.16	1	0.84	0.913043478	0.98326519	0.01673481	0.957619477	0.891687657	0.923478261
371	1	0	1	1	1	0.84	0.16	1	0.84	0.913043478	0.98326519	0.01673481	0.957619477	0.891687657	0.923478261
371	1	0	1	1	1	0.84	0.16	1	0.84	0.913043478	0.98326519	0.01673481	0.957619477	0.891687657	0.923478261
371	1	0	1	1	1	0.84	0.16	1	0.84	0.913043478	0.98326519	0.01673481	0.957619477	0.891687657	0.923478261
371	1	0	1	1	1	0.84	0.16	1	0.84	0.913043478	0.98326519	0.01673481	0.957619477	0.891687657	0.923478261
371	1	0	1	1	1	0.84	0.16	1	0.84	0.913043478	0.98326519	0.01673481	0.957619477	0.891687657	0.923478261
371	1	0	1	1	1	0.84	0.16	1	0.84	0.913043478	0.98326519	0.01673481	0.957619477	0.891687657	0.923478261
371	1	0	1	1	1	0.84	0.16	1	0.84	0.913043478	0.98326519	0.01673481	0.957619477	0.891687657	0.923478261
371	1	0	1	1	1	0.84	0.16	1	0.84	0.913043478	0.98326519	0.01673481	0.957619477	0.891687657	0.923478261
371	1	0	1	1	1	0.84	0.16	1	0.84	0.913043478	0.98326519	0.01673481	0.957619477	0.891687657	0.923478261
371	1	0	1	1	1	0.84	0.16	1	0.84	0.913043478	0.98326519	0.01673481	0.957619477	0.891687657	0.923478261
371	1	0	1	1	1	0.84	0.16	1	0.84	0.913043478	0.98326519	0.01673481	0.957619477	0.891687657	0.923478261
371	1	0	1	1	1	0.84	0.16	1	0.84	0.913043478	0.98326519	0.01673481	0.957619477	0.891687657	0.923478261
371	1	0	1	1	1	0.84	0.16	1	0.84	0.913043478	0.98326519	0.01673481	0.957619477	0.891687657	0.923478261
371	1	0	1	1	1	0.84	0.16	1	0.84	0.913043478	0.98326519	0.01673481	0.957619477	0.891687657	0.923478261
371	1	0	1	1	1	0.84	0.16	1	0.84	0.913043478	0.98326519	0.01673481	0.957619477	0.891687657	0.923478261
371	1	0	1	1	1	0.84	0.16	1	0.84	0.913043478	0.98326519	0.01673481	0.957619477	0.891687657	0.923478261
371	1	0	1	1	1	0.84	0.16	1	0.84	0.913043478	0.98326519	0.01673481	0.957619477	0.891687657	0.923478261
371	1	0	1	1	1	0.84	0.16	1	0.84	0.913043478	0.98326519	0.01673481	0.957619477	0.891687657	0.923478261
371	1	0	1	1	1	0.84	0.16	1	0.84	0.913043478	0.98326519	0.01673481	0.957619477	0.891687657	0.923478261
371	1	0	1	1	1	0.84	0.16	1	0.84	0.913043478	0.98326519	0.01673481	0.957619477	0.891687657	0.923478261
371	1	0	1	1	1	0.84	0.16	1	0.84	0.913043478	0.98326519	0.01673481	0.957619477	0.891687657	0.923478261
371	1	0	1	1	1	0.84	0.16	1	0.84	0.913043478	0.98326519	0.01673481	0.957619477	0.891687657	0.923478261
371	1	0	1	1	1	0.84	0.16	1	0.84	0.913043478	0.98326519	0.01673481	0.957619477	0.891687657	0.923478261
371	1	0	1	1	1	0.84	0.16	1	0.84	0.913043478	0.98326519	0.01673481	0.957619477	0.891687657	0.923478261
371	1	0	1	1	1	0.84	0.16	1	0.84	0.913043478	0.98326519	0.01673481	0.957619477	0.891687657	0.923478261
371	1	0	1	1	1	0.84	0.16	1	0.84	0.913043478	0.98326519	0.01673481	0.957619477	0.891687657	0.923478261
371	1	0	1	1	1	0.84	0.16	1	0.84	0.913043478	0.98326519	0.01673481	0.957619477	0.891687657	0.923478261
371	1	0	1	1	1	0.84	0.16	1	0.84	0.913043478	0.98326519	0.01673481	0.957619477	0.891687657	0.923478261
371	1	0	1	1	1	0.84	0.16	1	0.84	0.913043478	0.98326519	0.01673481	0.957619477	0.891687657	0.923478261
371	1	0	1	1	1	0.84	0.16	1	0.84	0.913043478	0.98326519	0.01673481	0.957619477	0.891687657	0.923478261
371	1	0	1	1	1	0.84	0.16	1	0.84	0.913043478	0.98326519	0.01673481	0.957619477	0.891687657	0.923478261
371	1	0	1	1	1	0.84	0.16	1	0.84	0.913043478	0.98326519	0.01673481	0.957619477	0.891687657	0.923478261
371	1	0	1	1	1	0.84	0.16	1	0.84	0.913043478	0.98326519	0.01673481	0.957619477	0.891687657	0.923478261
371	1	0	1	1	1	0.84	0.16	1	0.84	0.913043478	0.98326519	0.01673481	0.957619477	0.891687657	0.923478261
371	1	0	1	1	1	0.84	0.16	1	0.84	0.913043478	0.98326519	0.01673481	0.957619477	0.891687657	0.923478261
371	1	0	1	1	1	0.84	0.16	1	0.84	0.913043478	0.98326519	0.01673481	0.957619477	0.891687657	0.923478261
371	1	0	1	1	1	0.84	0.16	1	0.84	0.913043478	0.98326519	0.01673481	0.957619477	0.891687657	0.923478261
371	1	0	1	1	1	0.84	0.16	1	0.84	0.913043478	0.98326519	0.01673481	0.957619477	0.891687657	0.923478261
