# Supplementary material for: An Improved Hybrid Feature Selection Algorithm for Electric Charge Recovery Risk
Source: Hindawi journal article supplement (doi:10.1155/2020/8479341), 2020-08-28
Supplement: f1 [file 8479341.f1.zip › 8479341.f1/Experimental Results/201808/BGWO_results.csv]

features_num	Accuracy_high	Loss_high	Precission_high	Recall_high	F1_high	Accuracy_med	Loss_med	Precission_med	Recall_med	F1_med	Accuracy_low	Loss_low	Precission_low	Recall_low	F1_low
280	1.0	0.0	1.0	1.0	1.0	0.9046474358974359	0.0953525641025641	0.9973404255319149	0.9065269943593876	0.9497678345293372	0.8742228111303639	0.12577718886963607	0.28354725787631274	0.9878048780487805	0.4406165004533092
363	1.0	0.0	1.0	1.0	1.0	0.8046558704453441	0.19534412955465585	0.9056152927120669	0.8692660550458715	0.8870684610883557	0.911642094560244	0.08835790543975597	0.3988391376451078	0.7696	0.525395958492627
389	1.0	0.0	1.0	1.0	1.0	0.8466386554621849	0.15336134453781514	0.9418886198547215	0.8881278538812786	0.9142185663924794	0.9333333333333333	0.06666666666666665	0.5270758122743683	0.8055172413793104	0.6372067648663394
389	1.0	0.0	1.0	1.0	1.0	0.8466386554621849	0.15336134453781514	0.9418886198547215	0.8881278538812786	0.9142185663924794	0.9333333333333333	0.06666666666666665	0.5270758122743683	0.8055172413793104	0.6372067648663394
389	1.0	0.0	1.0	1.0	1.0	0.8466386554621849	0.15336134453781514	0.9418886198547215	0.8881278538812786	0.9142185663924794	0.9333333333333333	0.06666666666666665	0.5270758122743683	0.8055172413793104	0.6372067648663394
389	1.0	0.0	1.0	1.0	1.0	0.8466386554621849	0.15336134453781514	0.9418886198547215	0.8881278538812786	0.9142185663924794	0.9333333333333333	0.06666666666666665	0.5270758122743683	0.8055172413793104	0.6372067648663394
389	1.0	0.0	1.0	1.0	1.0	0.8466386554621849	0.15336134453781514	0.9418886198547215	0.8881278538812786	0.9142185663924794	0.9333333333333333	0.06666666666666665	0.5270758122743683	0.8055172413793104	0.6372067648663394
325	1.0	0.0	1.0	1.0	1.0	0.8406091370558376	0.15939086294416238	0.976218787158145	0.8569937369519833	0.9127292940522513	0.9484351713859911	0.051564828614008906	0.6170616113744076	0.8498694516971279	0.71499176276771
325	1.0	0.0	1.0	1.0	1.0	0.8406091370558376	0.15939086294416238	0.976218787158145	0.8569937369519833	0.9127292940522513	0.9484351713859911	0.051564828614008906	0.6170616113744076	0.8498694516971279	0.71499176276771
325	1.0	0.0	1.0	1.0	1.0	0.8406091370558376	0.15939086294416238	0.976218787158145	0.8569937369519833	0.9127292940522513	0.9484351713859911	0.051564828614008906	0.6170616113744076	0.8498694516971279	0.71499176276771
325	1.0	0.0	1.0	1.0	1.0	0.8406091370558376	0.15939086294416238	0.976218787158145	0.8569937369519833	0.9127292940522513	0.9484351713859911	0.051564828614008906	0.6170616113744076	0.8498694516971279	0.71499176276771
325	1.0	0.0	1.0	1.0	1.0	0.8406091370558376	0.15939086294416238	0.976218787158145	0.8569937369519833	0.9127292940522513	0.9484351713859911	0.051564828614008906	0.6170616113744076	0.8498694516971279	0.71499176276771
325	1.0	0.0	1.0	1.0	1.0	0.8406091370558376	0.15939086294416238	0.976218787158145	0.8569937369519833	0.9127292940522513	0.9484351713859911	0.051564828614008906	0.6170616113744076	0.8498694516971279	0.71499176276771
325	1.0	0.0	1.0	1.0	1.0	0.8406091370558376	0.15939086294416238	0.976218787158145	0.8569937369519833	0.9127292940522513	0.9484351713859911	0.051564828614008906	0.6170616113744076	0.8498694516971279	0.71499176276771
325	1.0	0.0	1.0	1.0	1.0	0.8406091370558376	0.15939086294416238	0.976218787158145	0.8569937369519833	0.9127292940522513	0.9484351713859911	0.051564828614008906	0.6170616113744076	0.8498694516971279	0.71499176276771
325	1.0	0.0	1.0	1.0	1.0	0.8406091370558376	0.15939086294416238	0.976218787158145	0.8569937369519833	0.9127292940522513	0.9484351713859911	0.051564828614008906	0.6170616113744076	0.8498694516971279	0.71499176276771
325	1.0	0.0	1.0	1.0	1.0	0.8406091370558376	0.15939086294416238	0.976218787158145	0.8569937369519833	0.9127292940522513	0.9484351713859911	0.051564828614008906	0.6170616113744076	0.8498694516971279	0.71499176276771
325	1.0	0.0	1.0	1.0	1.0	0.8321964529331515	0.16780354706684852	0.9983579638752053	0.8328767123287671	0.9081404032860344	0.9805319969159599	0.019468003084040064	0.9208704253214639	0.8841405508072174	0.9021317829457365
325	1.0	0.0	1.0	1.0	1.0	0.8321964529331515	0.16780354706684852	0.9983579638752053	0.8328767123287671	0.9081404032860344	0.9805319969159599	0.019468003084040064	0.9208704253214639	0.8841405508072174	0.9021317829457365
325	1.0	0.0	1.0	1.0	1.0	0.8321964529331515	0.16780354706684852	0.9983579638752053	0.8328767123287671	0.9081404032860344	0.9805319969159599	0.019468003084040064	0.9208704253214639	0.8841405508072174	0.9021317829457365
325	1.0	0.0	1.0	1.0	1.0	0.8321964529331515	0.16780354706684852	0.9983579638752053	0.8328767123287671	0.9081404032860344	0.9805319969159599	0.019468003084040064	0.9208704253214639	0.8841405508072174	0.9021317829457365
325	1.0	0.0	1.0	1.0	1.0	0.8321964529331515	0.16780354706684852	0.9983579638752053	0.8328767123287671	0.9081404032860344	0.9805319969159599	0.019468003084040064	0.9208704253214639	0.8841405508072174	0.9021317829457365
325	1.0	0.0	1.0	1.0	1.0	0.8321964529331515	0.16780354706684852	0.9983579638752053	0.8328767123287671	0.9081404032860344	0.9805319969159599	0.019468003084040064	0.9208704253214639	0.8841405508072174	0.9021317829457365
325	1.0	0.0	1.0	1.0	1.0	0.8321964529331515	0.16780354706684852	0.9983579638752053	0.8328767123287671	0.9081404032860344	0.9805319969159599	0.019468003084040064	0.9208704253214639	0.8841405508072174	0.9021317829457365
325	1.0	0.0	1.0	1.0	1.0	0.8321964529331515	0.16780354706684852	0.9983579638752053	0.8328767123287671	0.9081404032860344	0.9805319969159599	0.019468003084040064	0.9208704253214639	0.8841405508072174	0.9021317829457365
325	1.0	0.0	1.0	1.0	1.0	0.8321964529331515	0.16780354706684852	0.9983579638752053	0.8328767123287671	0.9081404032860344	0.9805319969159599	0.019468003084040064	0.9208704253214639	0.8841405508072174	0.9021317829457365
325	1.0	0.0	1.0	1.0	1.0	0.8321964529331515	0.16780354706684852	0.9983579638752053	0.8328767123287671	0.9081404032860344	0.9805319969159599	0.019468003084040064	0.9208704253214639	0.8841405508072174	0.9021317829457365
325	1.0	0.0	1.0	1.0	1.0	0.8321964529331515	0.16780354706684852	0.9983579638752053	0.8328767123287671	0.9081404032860344	0.9805319969159599	0.019468003084040064	0.9208704253214639	0.8841405508072174	0.9021317829457365
325	1.0	0.0	1.0	1.0	1.0	0.8321964529331515	0.16780354706684852	0.9983579638752053	0.8328767123287671	0.9081404032860344	0.9805319969159599	0.019468003084040064	0.9208704253214639	0.8841405508072174	0.9021317829457365
325	1.0	0.0	1.0	1.0	1.0	0.8321964529331515	0.16780354706684852	0.9983579638752053	0.8328767123287671	0.9081404032860344	0.9805319969159599	0.019468003084040064	0.9208704253214639	0.8841405508072174	0.9021317829457365
325	1.0	0.0	1.0	1.0	1.0	0.8321964529331515	0.16780354706684852	0.9983579638752053	0.8328767123287671	0.9081404032860344	0.9805319969159599	0.019468003084040064	0.9208704253214639	0.8841405508072174	0.9021317829457365
325	1.0	0.0	1.0	1.0	1.0	0.8321964529331515	0.16780354706684852	0.9983579638752053	0.8328767123287671	0.9081404032860344	0.9805319969159599	0.019468003084040064	0.9208704253214639	0.8841405508072174	0.9021317829457365
325	1.0	0.0	1.0	1.0	1.0	0.8321964529331515	0.16780354706684852	0.9983579638752053	0.8328767123287671	0.9081404032860344	0.9805319969159599	0.019468003084040064	0.9208704253214639	0.8841405508072174	0.9021317829457365
325	1.0	0.0	1.0	1.0	1.0	0.8321964529331515	0.16780354706684852	0.9983579638752053	0.8328767123287671	0.9081404032860344	0.9805319969159599	0.019468003084040064	0.9208704253214639	0.8841405508072174	0.9021317829457365
325	1.0	0.0	1.0	1.0	1.0	0.8321964529331515	0.16780354706684852	0.9983579638752053	0.8328767123287671	0.9081404032860344	0.9805319969159599	0.019468003084040064	0.9208704253214639	0.8841405508072174	0.9021317829457365
325	1.0	0.0	1.0	1.0	1.0	0.8321964529331515	0.16780354706684852	0.9983579638752053	0.8328767123287671	0.9081404032860344	0.9805319969159599	0.019468003084040064	0.9208704253214639	0.8841405508072174	0.9021317829457365
325	1.0	0.0	1.0	1.0	1.0	0.8321964529331515	0.16780354706684852	0.9983579638752053	0.8328767123287671	0.9081404032860344	0.9805319969159599	0.019468003084040064	0.9208704253214639	0.8841405508072174	0.9021317829457365
325	1.0	0.0	1.0	1.0	1.0	0.8321964529331515	0.16780354706684852	0.9983579638752053	0.8328767123287671	0.9081404032860344	0.9805319969159599	0.019468003084040064	0.9208704253214639	0.8841405508072174	0.9021317829457365
325	1.0	0.0	1.0	1.0	1.0	0.8321964529331515	0.16780354706684852	0.9983579638752053	0.8328767123287671	0.9081404032860344	0.9805319969159599	0.019468003084040064	0.9208704253214639	0.8841405508072174	0.9021317829457365
325	1.0	0.0	1.0	1.0	1.0	0.8321964529331515	0.16780354706684852	0.9983579638752053	0.8328767123287671	0.9081404032860344	0.9805319969159599	0.019468003084040064	0.9208704253214639	0.8841405508072174	0.9021317829457365
325	1.0	0.0	1.0	1.0	1.0	0.8321964529331515	0.16780354706684852	0.9983579638752053	0.8328767123287671	0.9081404032860344	0.9805319969159599	0.019468003084040064	0.9208704253214639	0.8841405508072174	0.9021317829457365
325	1.0	0.0	1.0	1.0	1.0	0.8321964529331515	0.16780354706684852	0.9983579638752053	0.8328767123287671	0.9081404032860344	0.9805319969159599	0.019468003084040064	0.9208704253214639	0.8841405508072174	0.9021317829457365
325	1.0	0.0	1.0	1.0	1.0	0.8321964529331515	0.16780354706684852	0.9983579638752053	0.8328767123287671	0.9081404032860344	0.9805319969159599	0.019468003084040064	0.9208704253214639	0.8841405508072174	0.9021317829457365
325	1.0	0.0	1.0	1.0	1.0	0.8321964529331515	0.16780354706684852	0.9983579638752053	0.8328767123287671	0.9081404032860344	0.9805319969159599	0.019468003084040064	0.9208704253214639	0.8841405508072174	0.9021317829457365
325	1.0	0.0	1.0	1.0	1.0	0.8321964529331515	0.16780354706684852	0.9983579638752053	0.8328767123287671	0.9081404032860344	0.9805319969159599	0.019468003084040064	0.9208704253214639	0.8841405508072174	0.9021317829457365
325	1.0	0.0	1.0	1.0	1.0	0.8321964529331515	0.16780354706684852	0.9983579638752053	0.8328767123287671	0.9081404032860344	0.9805319969159599	0.019468003084040064	0.9208704253214639	0.8841405508072174	0.9021317829457365
325	1.0	0.0	1.0	1.0	1.0	0.8321964529331515	0.16780354706684852	0.9983579638752053	0.8328767123287671	0.9081404032860344	0.9805319969159599	0.019468003084040064	0.9208704253214639	0.8841405508072174	0.9021317829457365
325	1.0	0.0	1.0	1.0	1.0	0.8321964529331515	0.16780354706684852	0.9983579638752053	0.8328767123287671	0.9081404032860344	0.9805319969159599	0.019468003084040064	0.9208704253214639	0.8841405508072174	0.9021317829457365
325	1.0	0.0	1.0	1.0	1.0	0.8321964529331515	0.16780354706684852	0.9983579638752053	0.8328767123287671	0.9081404032860344	0.9805319969159599	0.019468003084040064	0.9208704253214639	0.8841405508072174	0.9021317829457365
325	1.0	0.0	1.0	1.0	1.0	0.8321964529331515	0.16780354706684852	0.9983579638752053	0.8328767123287671	0.9081404032860344	0.9805319969159599	0.019468003084040064	0.9208704253214639	0.8841405508072174	0.9021317829457365
325	1.0	0.0	1.0	1.0	1.0	0.8321964529331515	0.16780354706684852	0.9983579638752053	0.8328767123287671	0.9081404032860344	0.9805319969159599	0.019468003084040064	0.9208704253214639	0.8841405508072174	0.9021317829457365
325	1.0	0.0	1.0	1.0	1.0	0.8321964529331515	0.16780354706684852	0.9983579638752053	0.8328767123287671	0.9081404032860344	0.9805319969159599	0.019468003084040064	0.9208704253214639	0.8841405508072174	0.9021317829457365
325	1.0	0.0	1.0	1.0	1.0	0.8321964529331515	0.16780354706684852	0.9983579638752053	0.8328767123287671	0.9081404032860344	0.9805319969159599	0.019468003084040064	0.9208704253214639	0.8841405508072174	0.9021317829457365
325	1.0	0.0	1.0	1.0	1.0	0.8321964529331515	0.16780354706684852	0.9983579638752053	0.8328767123287671	0.9081404032860344	0.9805319969159599	0.019468003084040064	0.9208704253214639	0.8841405508072174	0.9021317829457365
325	1.0	0.0	1.0	1.0	1.0	0.8321964529331515	0.16780354706684852	0.9983579638752053	0.8328767123287671	0.9081404032860344	0.9805319969159599	0.019468003084040064	0.9208704253214639	0.8841405508072174	0.9021317829457365
325	1.0	0.0	1.0	1.0	1.0	0.8321964529331515	0.16780354706684852	0.9983579638752053	0.8328767123287671	0.9081404032860344	0.9805319969159599	0.019468003084040064	0.9208704253214639	0.8841405508072174	0.9021317829457365
325	1.0	0.0	1.0	1.0	1.0	0.8321964529331515	0.16780354706684852	0.9983579638752053	0.8328767123287671	0.9081404032860344	0.9805319969159599	0.019468003084040064	0.9208704253214639	0.8841405508072174	0.9021317829457365
325	1.0	0.0	1.0	1.0	1.0	0.8321964529331515	0.16780354706684852	0.9983579638752053	0.8328767123287671	0.9081404032860344	0.9805319969159599	0.019468003084040064	0.9208704253214639	0.8841405508072174	0.9021317829457365
325	1.0	0.0	1.0	1.0	1.0	0.8321964529331515	0.16780354706684852	0.9983579638752053	0.8328767123287671	0.9081404032860344	0.9805319969159599	0.019468003084040064	0.9208704253214639	0.8841405508072174	0.9021317829457365
325	1.0	0.0	1.0	1.0	1.0	0.8321964529331515	0.16780354706684852	0.9983579638752053	0.8328767123287671	0.9081404032860344	0.9805319969159599	0.019468003084040064	0.9208704253214639	0.8841405508072174	0.9021317829457365
325	1.0	0.0	1.0	1.0	1.0	0.8321964529331515	0.16780354706684852	0.9983579638752053	0.8328767123287671	0.9081404032860344	0.9805319969159599	0.019468003084040064	0.9208704253214639	0.8841405508072174	0.9021317829457365
325	1.0	0.0	1.0	1.0	1.0	0.8321964529331515	0.16780354706684852	0.9983579638752053	0.8328767123287671	0.9081404032860344	0.9805319969159599	0.019468003084040064	0.9208704253214639	0.8841405508072174	0.9021317829457365
325	1.0	0.0	1.0	1.0	1.0	0.8321964529331515	0.16780354706684852	0.9983579638752053	0.8328767123287671	0.9081404032860344	0.9805319969159599	0.019468003084040064	0.9208704253214639	0.8841405508072174	0.9021317829457365
325	1.0	0.0	1.0	1.0	1.0	0.8321964529331515	0.16780354706684852	0.9983579638752053	0.8328767123287671	0.9081404032860344	0.9805319969159599	0.019468003084040064	0.9208704253214639	0.8841405508072174	0.9021317829457365
325	1.0	0.0	1.0	1.0	1.0	0.8321964529331515	0.16780354706684852	0.9983579638752053	0.8328767123287671	0.9081404032860344	0.9805319969159599	0.019468003084040064	0.9208704253214639	0.8841405508072174	0.9021317829457365
325	1.0	0.0	1.0	1.0	1.0	0.8321964529331515	0.16780354706684852	0.9983579638752053	0.8328767123287671	0.9081404032860344	0.9805319969159599	0.019468003084040064	0.9208704253214639	0.8841405508072174	0.9021317829457365
325	1.0	0.0	1.0	1.0	1.0	0.8321964529331515	0.16780354706684852	0.9983579638752053	0.8328767123287671	0.9081404032860344	0.9805319969159599	0.019468003084040064	0.9208704253214639	0.8841405508072174	0.9021317829457365
325	1.0	0.0	1.0	1.0	1.0	0.8321964529331515	0.16780354706684852	0.9983579638752053	0.8328767123287671	0.9081404032860344	0.9805319969159599	0.019468003084040064	0.9208704253214639	0.8841405508072174	0.9021317829457365
325	1.0	0.0	1.0	1.0	1.0	0.8321964529331515	0.16780354706684852	0.9983579638752053	0.8328767123287671	0.9081404032860344	0.9805319969159599	0.019468003084040064	0.9208704253214639	0.8841405508072174	0.9021317829457365
325	1.0	0.0	1.0	1.0	1.0	0.8321964529331515	0.16780354706684852	0.9983579638752053	0.8328767123287671	0.9081404032860344	0.9805319969159599	0.019468003084040064	0.9208704253214639	0.8841405508072174	0.9021317829457365
325	1.0	0.0	1.0	1.0	1.0	0.8321964529331515	0.16780354706684852	0.9983579638752053	0.8328767123287671	0.9081404032860344	0.9805319969159599	0.019468003084040064	0.9208704253214639	0.8841405508072174	0.9021317829457365
325	1.0	0.0	1.0	1.0	1.0	0.8321964529331515	0.16780354706684852	0.9983579638752053	0.8328767123287671	0.9081404032860344	0.9805319969159599	0.019468003084040064	0.9208704253214639	0.8841405508072174	0.9021317829457365
325	1.0	0.0	1.0	1.0	1.0	0.8321964529331515	0.16780354706684852	0.9983579638752053	0.8328767123287671	0.9081404032860344	0.9805319969159599	0.019468003084040064	0.9208704253214639	0.8841405508072174	0.9021317829457365
325	1.0	0.0	1.0	1.0	1.0	0.8321964529331515	0.16780354706684852	0.9983579638752053	0.8328767123287671	0.9081404032860344	0.9805319969159599	0.019468003084040064	0.9208704253214639	0.8841405508072174	0.9021317829457365
325	1.0	0.0	1.0	1.0	1.0	0.8321964529331515	0.16780354706684852	0.9983579638752053	0.8328767123287671	0.9081404032860344	0.9805319969159599	0.019468003084040064	0.9208704253214639	0.8841405508072174	0.9021317829457365
325	1.0	0.0	1.0	1.0	1.0	0.8321964529331515	0.16780354706684852	0.9983579638752053	0.8328767123287671	0.9081404032860344	0.9805319969159599	0.019468003084040064	0.9208704253214639	0.8841405508072174	0.9021317829457365
325	1.0	0.0	1.0	1.0	1.0	0.8321964529331515	0.16780354706684852	0.9983579638752053	0.8328767123287671	0.9081404032860344	0.9805319969159599	0.019468003084040064	0.9208704253214639	0.8841405508072174	0.9021317829457365
325	1.0	0.0	1.0	1.0	1.0	0.8321964529331515	0.16780354706684852	0.9983579638752053	0.8328767123287671	0.9081404032860344	0.9805319969159599	0.019468003084040064	0.9208704253214639	0.8841405508072174	0.9021317829457365
325	1.0	0.0	1.0	1.0	1.0	0.8321964529331515	0.16780354706684852	0.9983579638752053	0.8328767123287671	0.9081404032860344	0.9805319969159599	0.019468003084040064	0.9208704253214639	0.8841405508072174	0.9021317829457365
325	1.0	0.0	1.0	1.0	1.0	0.8321964529331515	0.16780354706684852	0.9983579638752053	0.8328767123287671	0.9081404032860344	0.9805319969159599	0.019468003084040064	0.9208704253214639	0.8841405508072174	0.9021317829457365
325	1.0	0.0	1.0	1.0	1.0	0.8321964529331515	0.16780354706684852	0.9983579638752053	0.8328767123287671	0.9081404032860344	0.9805319969159599	0.019468003084040064	0.9208704253214639	0.8841405508072174	0.9021317829457365
325	1.0	0.0	1.0	1.0	1.0	0.8321964529331515	0.16780354706684852	0.9983579638752053	0.8328767123287671	0.9081404032860344	0.9805319969159599	0.019468003084040064	0.9208704253214639	0.8841405508072174	0.9021317829457365
325	1.0	0.0	1.0	1.0	1.0	0.8321964529331515	0.16780354706684852	0.9983579638752053	0.8328767123287671	0.9081404032860344	0.9805319969159599	0.019468003084040064	0.9208704253214639	0.8841405508072174	0.9021317829457365
309	1.0	0.0	1.0	1.0	1.0	0.8162230671736375	0.18377693282636254	1.0	0.8157560355781448	0.8985304408677397	0.9857516719976738	0.014248328002326227	0.9325153374233128	0.918429003021148	0.9254185692541856
309	1.0	0.0	1.0	1.0	1.0	0.8162230671736375	0.18377693282636254	1.0	0.8157560355781448	0.8985304408677397	0.9857516719976738	0.014248328002326227	0.9325153374233128	0.918429003021148	0.9254185692541856
309	1.0	0.0	1.0	1.0	1.0	0.8162230671736375	0.18377693282636254	1.0	0.8157560355781448	0.8985304408677397	0.9857516719976738	0.014248328002326227	0.9325153374233128	0.918429003021148	0.9254185692541856
309	1.0	0.0	1.0	1.0	1.0	0.8162230671736375	0.18377693282636254	1.0	0.8157560355781448	0.8985304408677397	0.9857516719976738	0.014248328002326227	0.9325153374233128	0.918429003021148	0.9254185692541856
309	1.0	0.0	1.0	1.0	1.0	0.8162230671736375	0.18377693282636254	1.0	0.8157560355781448	0.8985304408677397	0.9857516719976738	0.014248328002326227	0.9325153374233128	0.918429003021148	0.9254185692541856
309	1.0	0.0	1.0	1.0	1.0	0.8162230671736375	0.18377693282636254	1.0	0.8157560355781448	0.8985304408677397	0.9857516719976738	0.014248328002326227	0.9325153374233128	0.918429003021148	0.9254185692541856
309	1.0	0.0	1.0	1.0	1.0	0.8162230671736375	0.18377693282636254	1.0	0.8157560355781448	0.8985304408677397	0.9857516719976738	0.014248328002326227	0.9325153374233128	0.918429003021148	0.9254185692541856
309	1.0	0.0	1.0	1.0	1.0	0.8162230671736375	0.18377693282636254	1.0	0.8157560355781448	0.8985304408677397	0.9857516719976738	0.014248328002326227	0.9325153374233128	0.918429003021148	0.9254185692541856
309	1.0	0.0	1.0	1.0	1.0	0.8162230671736375	0.18377693282636254	1.0	0.8157560355781448	0.8985304408677397	0.9857516719976738	0.014248328002326227	0.9325153374233128	0.918429003021148	0.9254185692541856
309	1.0	0.0	1.0	1.0	1.0	0.8162230671736375	0.18377693282636254	1.0	0.8157560355781448	0.8985304408677397	0.9857516719976738	0.014248328002326227	0.9325153374233128	0.918429003021148	0.9254185692541856
309	1.0	0.0	1.0	1.0	1.0	0.8162230671736375	0.18377693282636254	1.0	0.8157560355781448	0.8985304408677397	0.9857516719976738	0.014248328002326227	0.9325153374233128	0.918429003021148	0.9254185692541856
309	1.0	0.0	1.0	1.0	1.0	0.8162230671736375	0.18377693282636254	1.0	0.8157560355781448	0.8985304408677397	0.9857516719976738	0.014248328002326227	0.9325153374233128	0.918429003021148	0.9254185692541856
309	1.0	0.0	1.0	1.0	1.0	0.8162230671736375	0.18377693282636254	1.0	0.8157560355781448	0.8985304408677397	0.9857516719976738	0.014248328002326227	0.9325153374233128	0.918429003021148	0.9254185692541856
309	1.0	0.0	1.0	1.0	1.0	0.8162230671736375	0.18377693282636254	1.0	0.8157560355781448	0.8985304408677397	0.9857516719976738	0.014248328002326227	0.9325153374233128	0.918429003021148	0.9254185692541856
309	1.0	0.0	1.0	1.0	1.0	0.8162230671736375	0.18377693282636254	1.0	0.8157560355781448	0.8985304408677397	0.9857516719976738	0.014248328002326227	0.9325153374233128	0.918429003021148	0.9254185692541856
309	1.0	0.0	1.0	1.0	1.0	0.8162230671736375	0.18377693282636254	1.0	0.8157560355781448	0.8985304408677397	0.9857516719976738	0.014248328002326227	0.9325153374233128	0.918429003021148	0.9254185692541856
309	1.0	0.0	1.0	1.0	1.0	0.8162230671736375	0.18377693282636254	1.0	0.8157560355781448	0.8985304408677397	0.9857516719976738	0.014248328002326227	0.9325153374233128	0.918429003021148	0.9254185692541856
