# Supplementary material for: An Improved Hybrid Feature Selection Algorithm for Electric Charge Recovery Risk
Source: Hindawi journal article supplement (doi:10.1155/2020/8479341), 2020-08-28
Supplement: f1 [file 8479341.f1.zip › 8479341.f1/Experimental Results/201808/BGWO_SBS_results.csv]

features_num	Accuracy_high	Loss_high	Precission_high	Recall_high	F1_high	Accuracy_med	Loss_med	Precission_med	Recall_med	F1_med	Accuracy_low	Loss_low	Precission_low	Recall_low	F1_low
309	1	0	1	1	1	0.818297332	0.181702668	1	0.817834395	0.899789769	0.985754434	0.014245566	0.932653061	0.918592965	0.92556962
308	1	0	1	1	1	0.824808184	0.175191816	1	0.824358974	0.903724526	0.985858194	0.014141806	0.934826884	0.918	0.926337033
308	1	0	1	1	1	0.824808184	0.175191816	1	0.824358974	0.903724526	0.985858194	0.014141806	0.934826884	0.918	0.926337033
308	1	0	1	1	1	0.824808184	0.175191816	1	0.824358974	0.903724526	0.985858194	0.014141806	0.934826884	0.918	0.926337033
308	1	0	1	1	1	0.824808184	0.175191816	1	0.824358974	0.903724526	0.985858194	0.014141806	0.934826884	0.918	0.926337033
308	1	0	1	1	1	0.824808184	0.175191816	1	0.824358974	0.903724526	0.985858194	0.014141806	0.934826884	0.918	0.926337033
308	1	0	1	1	1	0.824808184	0.175191816	1	0.824358974	0.903724526	0.985858194	0.014141806	0.934826884	0.918	0.926337033
308	1	0	1	1	1	0.824808184	0.175191816	1	0.824358974	0.903724526	0.985858194	0.014141806	0.934826884	0.918	0.926337033
307	1	0	1	1	1	0.821879383	0.178120617	1	0.82137834	0.901930502	0.985667564	0.014332436	0.953785644	0.904850746	0.928674007
307	1	0	1	1	1	0.821879383	0.178120617	1	0.82137834	0.901930502	0.985667564	0.014332436	0.953785644	0.904850746	0.928674007
307	1	0	1	1	1	0.821879383	0.178120617	1	0.82137834	0.901930502	0.985667564	0.014332436	0.953785644	0.904850746	0.928674007
307	1	0	1	1	1	0.821879383	0.178120617	1	0.82137834	0.901930502	0.985667564	0.014332436	0.953785644	0.904850746	0.928674007
307	1	0	1	1	1	0.821879383	0.178120617	1	0.82137834	0.901930502	0.985667564	0.014332436	0.953785644	0.904850746	0.928674007
307	1	0	1	1	1	0.821879383	0.178120617	1	0.82137834	0.901930502	0.985667564	0.014332436	0.953785644	0.904850746	0.928674007
307	1	0	1	1	1	0.821879383	0.178120617	1	0.82137834	0.901930502	0.985667564	0.014332436	0.953785644	0.904850746	0.928674007
307	1	0	1	1	1	0.821879383	0.178120617	1	0.82137834	0.901930502	0.985667564	0.014332436	0.953785644	0.904850746	0.928674007
307	1	0	1	1	1	0.821879383	0.178120617	1	0.82137834	0.901930502	0.985667564	0.014332436	0.953785644	0.904850746	0.928674007
307	1	0	1	1	1	0.821879383	0.178120617	1	0.82137834	0.901930502	0.985667564	0.014332436	0.953785644	0.904850746	0.928674007
307	1	0	1	1	1	0.821879383	0.178120617	1	0.82137834	0.901930502	0.985667564	0.014332436	0.953785644	0.904850746	0.928674007
307	1	0	1	1	1	0.821879383	0.178120617	1	0.82137834	0.901930502	0.985667564	0.014332436	0.953785644	0.904850746	0.928674007
307	1	0	1	1	1	0.821879383	0.178120617	1	0.82137834	0.901930502	0.985667564	0.014332436	0.953785644	0.904850746	0.928674007
307	1	0	1	1	1	0.821879383	0.178120617	1	0.82137834	0.901930502	0.985667564	0.014332436	0.953785644	0.904850746	0.928674007
307	1	0	1	1	1	0.821879383	0.178120617	1	0.82137834	0.901930502	0.985667564	0.014332436	0.953785644	0.904850746	0.928674007
307	1	0	1	1	1	0.821879383	0.178120617	1	0.82137834	0.901930502	0.985667564	0.014332436	0.953785644	0.904850746	0.928674007
307	1	0	1	1	1	0.821879383	0.178120617	1	0.82137834	0.901930502	0.985667564	0.014332436	0.953785644	0.904850746	0.928674007
307	1	0	1	1	1	0.821879383	0.178120617	1	0.82137834	0.901930502	0.985667564	0.014332436	0.953785644	0.904850746	0.928674007
307	1	0	1	1	1	0.821879383	0.178120617	1	0.82137834	0.901930502	0.985667564	0.014332436	0.953785644	0.904850746	0.928674007
307	1	0	1	1	1	0.821879383	0.178120617	1	0.82137834	0.901930502	0.985667564	0.014332436	0.953785644	0.904850746	0.928674007
307	1	0	1	1	1	0.821879383	0.178120617	1	0.82137834	0.901930502	0.985667564	0.014332436	0.953785644	0.904850746	0.928674007
307	1	0	1	1	1	0.821879383	0.178120617	1	0.82137834	0.901930502	0.985667564	0.014332436	0.953785644	0.904850746	0.928674007
307	1	0	1	1	1	0.821879383	0.178120617	1	0.82137834	0.901930502	0.985667564	0.014332436	0.953785644	0.904850746	0.928674007
307	1	0	1	1	1	0.821879383	0.178120617	1	0.82137834	0.901930502	0.985667564	0.014332436	0.953785644	0.904850746	0.928674007
307	1	0	1	1	1	0.821879383	0.178120617	1	0.82137834	0.901930502	0.985667564	0.014332436	0.953785644	0.904850746	0.928674007
307	1	0	1	1	1	0.821879383	0.178120617	1	0.82137834	0.901930502	0.985667564	0.014332436	0.953785644	0.904850746	0.928674007
307	1	0	1	1	1	0.821879383	0.178120617	1	0.82137834	0.901930502	0.985667564	0.014332436	0.953785644	0.904850746	0.928674007
307	1	0	1	1	1	0.821879383	0.178120617	1	0.82137834	0.901930502	0.985667564	0.014332436	0.953785644	0.904850746	0.928674007
307	1	0	1	1	1	0.821879383	0.178120617	1	0.82137834	0.901930502	0.985667564	0.014332436	0.953785644	0.904850746	0.928674007
307	1	0	1	1	1	0.821879383	0.178120617	1	0.82137834	0.901930502	0.985667564	0.014332436	0.953785644	0.904850746	0.928674007
307	1	0	1	1	1	0.821879383	0.178120617	1	0.82137834	0.901930502	0.985667564	0.014332436	0.953785644	0.904850746	0.928674007
307	1	0	1	1	1	0.821879383	0.178120617	1	0.82137834	0.901930502	0.985667564	0.014332436	0.953785644	0.904850746	0.928674007
307	1	0	1	1	1	0.821879383	0.178120617	1	0.82137834	0.901930502	0.985667564	0.014332436	0.953785644	0.904850746	0.928674007
307	1	0	1	1	1	0.821879383	0.178120617	1	0.82137834	0.901930502	0.985667564	0.014332436	0.953785644	0.904850746	0.928674007
307	1	0	1	1	1	0.821879383	0.178120617	1	0.82137834	0.901930502	0.985667564	0.014332436	0.953785644	0.904850746	0.928674007
307	1	0	1	1	1	0.821879383	0.178120617	1	0.82137834	0.901930502	0.985667564	0.014332436	0.953785644	0.904850746	0.928674007
307	1	0	1	1	1	0.821879383	0.178120617	1	0.82137834	0.901930502	0.985667564	0.014332436	0.953785644	0.904850746	0.928674007
307	1	0	1	1	1	0.821879383	0.178120617	1	0.82137834	0.901930502	0.985667564	0.014332436	0.953785644	0.904850746	0.928674007
306	1	0	1	1	1	0.824742268	0.175257732	1	0.824289406	0.90368272	0.986062718	0.013937282	0.937246964	0.918650794	0.927855711
306	1	0	1	1	1	0.824742268	0.175257732	1	0.824289406	0.90368272	0.986062718	0.013937282	0.937246964	0.918650794	0.927855711
306	1	0	1	1	1	0.824742268	0.175257732	1	0.824289406	0.90368272	0.986062718	0.013937282	0.937246964	0.918650794	0.927855711
306	1	0	1	1	1	0.824742268	0.175257732	1	0.824289406	0.90368272	0.986062718	0.013937282	0.937246964	0.918650794	0.927855711
306	1	0	1	1	1	0.824742268	0.175257732	1	0.824289406	0.90368272	0.986062718	0.013937282	0.937246964	0.918650794	0.927855711
306	1	0	1	1	1	0.824742268	0.175257732	1	0.824289406	0.90368272	0.986062718	0.013937282	0.937246964	0.918650794	0.927855711
306	1	0	1	1	1	0.824742268	0.175257732	1	0.824289406	0.90368272	0.986062718	0.013937282	0.937246964	0.918650794	0.927855711
306	1	0	1	1	1	0.824742268	0.175257732	1	0.824289406	0.90368272	0.986062718	0.013937282	0.937246964	0.918650794	0.927855711
306	1	0	1	1	1	0.824742268	0.175257732	1	0.824289406	0.90368272	0.986062718	0.013937282	0.937246964	0.918650794	0.927855711
306	1	0	1	1	1	0.824742268	0.175257732	1	0.824289406	0.90368272	0.986062718	0.013937282	0.937246964	0.918650794	0.927855711
306	1	0	1	1	1	0.824742268	0.175257732	1	0.824289406	0.90368272	0.986062718	0.013937282	0.937246964	0.918650794	0.927855711
306	1	0	1	1	1	0.824742268	0.175257732	1	0.824289406	0.90368272	0.986062718	0.013937282	0.937246964	0.918650794	0.927855711
306	1	0	1	1	1	0.824742268	0.175257732	1	0.824289406	0.90368272	0.986062718	0.013937282	0.937246964	0.918650794	0.927855711
306	1	0	1	1	1	0.824742268	0.175257732	1	0.824289406	0.90368272	0.986062718	0.013937282	0.937246964	0.918650794	0.927855711
306	1	0	1	1	1	0.824742268	0.175257732	1	0.824289406	0.90368272	0.986062718	0.013937282	0.937246964	0.918650794	0.927855711
306	1	0	1	1	1	0.824742268	0.175257732	1	0.824289406	0.90368272	0.986062718	0.013937282	0.937246964	0.918650794	0.927855711
306	1	0	1	1	1	0.824742268	0.175257732	1	0.824289406	0.90368272	0.986062718	0.013937282	0.937246964	0.918650794	0.927855711
306	1	0	1	1	1	0.824742268	0.175257732	1	0.824289406	0.90368272	0.986062718	0.013937282	0.937246964	0.918650794	0.927855711
306	1	0	1	1	1	0.824742268	0.175257732	1	0.824289406	0.90368272	0.986062718	0.013937282	0.937246964	0.918650794	0.927855711
306	1	0	1	1	1	0.824742268	0.175257732	1	0.824289406	0.90368272	0.986062718	0.013937282	0.937246964	0.918650794	0.927855711
306	1	0	1	1	1	0.824742268	0.175257732	1	0.824289406	0.90368272	0.986062718	0.013937282	0.937246964	0.918650794	0.927855711
306	1	0	1	1	1	0.824742268	0.175257732	1	0.824289406	0.90368272	0.986062718	0.013937282	0.937246964	0.918650794	0.927855711
306	1	0	1	1	1	0.824742268	0.175257732	1	0.824289406	0.90368272	0.986062718	0.013937282	0.937246964	0.918650794	0.927855711
306	1	0	1	1	1	0.824742268	0.175257732	1	0.824289406	0.90368272	0.986062718	0.013937282	0.937246964	0.918650794	0.927855711
306	1	0	1	1	1	0.824742268	0.175257732	1	0.824289406	0.90368272	0.986062718	0.013937282	0.937246964	0.918650794	0.927855711
306	1	0	1	1	1	0.824742268	0.175257732	1	0.824289406	0.90368272	0.986062718	0.013937282	0.937246964	0.918650794	0.927855711
306	1	0	1	1	1	0.824742268	0.175257732	1	0.824289406	0.90368272	0.986062718	0.013937282	0.937246964	0.918650794	0.927855711
306	1	0	1	1	1	0.824742268	0.175257732	1	0.824289406	0.90368272	0.986062718	0.013937282	0.937246964	0.918650794	0.927855711
306	1	0	1	1	1	0.824742268	0.175257732	1	0.824289406	0.90368272	0.986062718	0.013937282	0.937246964	0.918650794	0.927855711
306	1	0	1	1	1	0.824742268	0.175257732	1	0.824289406	0.90368272	0.986062718	0.013937282	0.937246964	0.918650794	0.927855711
306	1	0	1	1	1	0.824742268	0.175257732	1	0.824289406	0.90368272	0.986062718	0.013937282	0.937246964	0.918650794	0.927855711
306	1	0	1	1	1	0.824742268	0.175257732	1	0.824289406	0.90368272	0.986062718	0.013937282	0.937246964	0.918650794	0.927855711
306	1	0	1	1	1	0.824742268	0.175257732	1	0.824289406	0.90368272	0.986062718	0.013937282	0.937246964	0.918650794	0.927855711
306	1	0	1	1	1	0.824742268	0.175257732	1	0.824289406	0.90368272	0.986062718	0.013937282	0.937246964	0.918650794	0.927855711
306	1	0	1	1	1	0.824742268	0.175257732	1	0.824289406	0.90368272	0.986062718	0.013937282	0.937246964	0.918650794	0.927855711
306	1	0	1	1	1	0.824742268	0.175257732	1	0.824289406	0.90368272	0.986062718	0.013937282	0.937246964	0.918650794	0.927855711
306	1	0	1	1	1	0.824742268	0.175257732	1	0.824289406	0.90368272	0.986062718	0.013937282	0.937246964	0.918650794	0.927855711
306	1	0	1	1	1	0.824742268	0.175257732	1	0.824289406	0.90368272	0.986062718	0.013937282	0.937246964	0.918650794	0.927855711
306	1	0	1	1	1	0.824742268	0.175257732	1	0.824289406	0.90368272	0.986062718	0.013937282	0.937246964	0.918650794	0.927855711
306	1	0	1	1	1	0.824742268	0.175257732	1	0.824289406	0.90368272	0.986062718	0.013937282	0.937246964	0.918650794	0.927855711
306	1	0	1	1	1	0.824742268	0.175257732	1	0.824289406	0.90368272	0.986062718	0.013937282	0.937246964	0.918650794	0.927855711
306	1	0	1	1	1	0.824742268	0.175257732	1	0.824289406	0.90368272	0.986062718	0.013937282	0.937246964	0.918650794	0.927855711
306	1	0	1	1	1	0.824742268	0.175257732	1	0.824289406	0.90368272	0.986062718	0.013937282	0.937246964	0.918650794	0.927855711
306	1	0	1	1	1	0.824742268	0.175257732	1	0.824289406	0.90368272	0.986062718	0.013937282	0.937246964	0.918650794	0.927855711
306	1	0	1	1	1	0.824742268	0.175257732	1	0.824289406	0.90368272	0.986062718	0.013937282	0.937246964	0.918650794	0.927855711
306	1	0	1	1	1	0.824742268	0.175257732	1	0.824289406	0.90368272	0.986062718	0.013937282	0.937246964	0.918650794	0.927855711
306	1	0	1	1	1	0.824742268	0.175257732	1	0.824289406	0.90368272	0.986062718	0.013937282	0.937246964	0.918650794	0.927855711
306	1	0	1	1	1	0.824742268	0.175257732	1	0.824289406	0.90368272	0.986062718	0.013937282	0.937246964	0.918650794	0.927855711
306	1	0	1	1	1	0.824742268	0.175257732	1	0.824289406	0.90368272	0.986062718	0.013937282	0.937246964	0.918650794	0.927855711
306	1	0	1	1	1	0.824742268	0.175257732	1	0.824289406	0.90368272	0.986062718	0.013937282	0.937246964	0.918650794	0.927855711
306	1	0	1	1	1	0.824742268	0.175257732	1	0.824289406	0.90368272	0.986062718	0.013937282	0.937246964	0.918650794	0.927855711
306	1	0	1	1	1	0.824742268	0.175257732	1	0.824289406	0.90368272	0.986062718	0.013937282	0.937246964	0.918650794	0.927855711
306	1	0	1	1	1	0.824742268	0.175257732	1	0.824289406	0.90368272	0.986062718	0.013937282	0.937246964	0.918650794	0.927855711
306	1	0	1	1	1	0.824742268	0.175257732	1	0.824289406	0.90368272	0.986062718	0.013937282	0.937246964	0.918650794	0.927855711
306	1	0	1	1	1	0.824742268	0.175257732	1	0.824289406	0.90368272	0.986062718	0.013937282	0.937246964	0.918650794	0.927855711
306	1	0	1	1	1	0.824742268	0.175257732	1	0.824289406	0.90368272	0.986062718	0.013937282	0.937246964	0.918650794	0.927855711
306	1	0	1	1	1	0.824742268	0.175257732	1	0.824289406	0.90368272	0.986062718	0.013937282	0.937246964	0.918650794	0.927855711
306	1	0	1	1	1	0.824742268	0.175257732	1	0.824289406	0.90368272	0.986062718	0.013937282	0.937246964	0.918650794	0.927855711
306	1	0	1	1	1	0.824742268	0.175257732	1	0.824289406	0.90368272	0.986062718	0.013937282	0.937246964	0.918650794	0.927855711
306	1	0	1	1	1	0.824742268	0.175257732	1	0.824289406	0.90368272	0.986062718	0.013937282	0.937246964	0.918650794	0.927855711
306	1	0	1	1	1	0.824742268	0.175257732	1	0.824289406	0.90368272	0.986062718	0.013937282	0.937246964	0.918650794	0.927855711
306	1	0	1	1	1	0.824742268	0.175257732	1	0.824289406	0.90368272	0.986062718	0.013937282	0.937246964	0.918650794	0.927855711
306	1	0	1	1	1	0.824742268	0.175257732	1	0.824289406	0.90368272	0.986062718	0.013937282	0.937246964	0.918650794	0.927855711
306	1	0	1	1	1	0.824742268	0.175257732	1	0.824289406	0.90368272	0.986062718	0.013937282	0.937246964	0.918650794	0.927855711
306	1	0	1	1	1	0.824742268	0.175257732	1	0.824289406	0.90368272	0.986062718	0.013937282	0.937246964	0.918650794	0.927855711
306	1	0	1	1	1	0.824742268	0.175257732	1	0.824289406	0.90368272	0.986062718	0.013937282	0.937246964	0.918650794	0.927855711
306	1	0	1	1	1	0.824742268	0.175257732	1	0.824289406	0.90368272	0.986062718	0.013937282	0.937246964	0.918650794	0.927855711
306	1	0	1	1	1	0.824742268	0.175257732	1	0.824289406	0.90368272	0.986062718	0.013937282	0.937246964	0.918650794	0.927855711
306	1	0	1	1	1	0.824742268	0.175257732	1	0.824289406	0.90368272	0.986062718	0.013937282	0.937246964	0.918650794	0.927855711
306	1	0	1	1	1	0.824742268	0.175257732	1	0.824289406	0.90368272	0.986062718	0.013937282	0.937246964	0.918650794	0.927855711
306	1	0	1	1	1	0.824742268	0.175257732	1	0.824289406	0.90368272	0.986062718	0.013937282	0.937246964	0.918650794	0.927855711
306	1	0	1	1	1	0.824742268	0.175257732	1	0.824289406	0.90368272	0.986062718	0.013937282	0.937246964	0.918650794	0.927855711
306	1	0	1	1	1	0.824742268	0.175257732	1	0.824289406	0.90368272	0.986062718	0.013937282	0.937246964	0.918650794	0.927855711
306	1	0	1	1	1	0.824742268	0.175257732	1	0.824289406	0.90368272	0.986062718	0.013937282	0.937246964	0.918650794	0.927855711
306	1	0	1	1	1	0.824742268	0.175257732	1	0.824289406	0.90368272	0.986062718	0.013937282	0.937246964	0.918650794	0.927855711
306	1	0	1	1	1	0.824742268	0.175257732	1	0.824289406	0.90368272	0.986062718	0.013937282	0.937246964	0.918650794	0.927855711
306	1	0	1	1	1	0.824742268	0.175257732	1	0.824289406	0.90368272	0.986062718	0.013937282	0.937246964	0.918650794	0.927855711
306	1	0	1	1	1	0.824742268	0.175257732	1	0.824289406	0.90368272	0.986062718	0.013937282	0.937246964	0.918650794	0.927855711
306	1	0	1	1	1	0.824742268	0.175257732	1	0.824289406	0.90368272	0.986062718	0.013937282	0.937246964	0.918650794	0.927855711
306	1	0	1	1	1	0.824742268	0.175257732	1	0.824289406	0.90368272	0.986062718	0.013937282	0.937246964	0.918650794	0.927855711
306	1	0	1	1	1	0.824742268	0.175257732	1	0.824289406	0.90368272	0.986062718	0.013937282	0.937246964	0.918650794	0.927855711
306	1	0	1	1	1	0.824742268	0.175257732	1	0.824289406	0.90368272	0.986062718	0.013937282	0.937246964	0.918650794	0.927855711
306	1	0	1	1	1	0.824742268	0.175257732	1	0.824289406	0.90368272	0.986062718	0.013937282	0.937246964	0.918650794	0.927855711
306	1	0	1	1	1	0.824742268	0.175257732	1	0.824289406	0.90368272	0.986062718	0.013937282	0.937246964	0.918650794	0.927855711
306	1	0	1	1	1	0.824742268	0.175257732	1	0.824289406	0.90368272	0.986062718	0.013937282	0.937246964	0.918650794	0.927855711
306	1	0	1	1	1	0.824742268	0.175257732	1	0.824289406	0.90368272	0.986062718	0.013937282	0.937246964	0.918650794	0.927855711
306	1	0	1	1	1	0.824742268	0.175257732	1	0.824289406	0.90368272	0.986062718	0.013937282	0.937246964	0.918650794	0.927855711
306	1	0	1	1	1	0.824742268	0.175257732	1	0.824289406	0.90368272	0.986062718	0.013937282	0.937246964	0.918650794	0.927855711
306	1	0	1	1	1	0.824742268	0.175257732	1	0.824289406	0.90368272	0.986062718	0.013937282	0.937246964	0.918650794	0.927855711
306	1	0	1	1	1	0.824742268	0.175257732	1	0.824289406	0.90368272	0.986062718	0.013937282	0.937246964	0.918650794	0.927855711
306	1	0	1	1	1	0.824742268	0.175257732	1	0.824289406	0.90368272	0.986062718	0.013937282	0.937246964	0.918650794	0.927855711
306	1	0	1	1	1	0.824742268	0.175257732	1	0.824289406	0.90368272	0.986062718	0.013937282	0.937246964	0.918650794	0.927855711
306	1	0	1	1	1	0.824742268	0.175257732	1	0.824289406	0.90368272	0.986062718	0.013937282	0.937246964	0.918650794	0.927855711
306	1	0	1	1	1	0.824742268	0.175257732	1	0.824289406	0.90368272	0.986062718	0.013937282	0.937246964	0.918650794	0.927855711
306	1	0	1	1	1	0.824742268	0.175257732	1	0.824289406	0.90368272	0.986062718	0.013937282	0.937246964	0.918650794	0.927855711
306	1	0	1	1	1	0.824742268	0.175257732	1	0.824289406	0.90368272	0.986062718	0.013937282	0.937246964	0.918650794	0.927855711
306	1	0	1	1	1	0.824742268	0.175257732	1	0.824289406	0.90368272	0.986062718	0.013937282	0.937246964	0.918650794	0.927855711
306	1	0	1	1	1	0.824742268	0.175257732	1	0.824289406	0.90368272	0.986062718	0.013937282	0.937246964	0.918650794	0.927855711
306	1	0	1	1	1	0.824742268	0.175257732	1	0.824289406	0.90368272	0.986062718	0.013937282	0.937246964	0.918650794	0.927855711
306	1	0	1	1	1	0.824742268	0.175257732	1	0.824289406	0.90368272	0.986062718	0.013937282	0.937246964	0.918650794	0.927855711
306	1	0	1	1	1	0.824742268	0.175257732	1	0.824289406	0.90368272	0.986062718	0.013937282	0.937246964	0.918650794	0.927855711
306	1	0	1	1	1	0.824742268	0.175257732	1	0.824289406	0.90368272	0.986062718	0.013937282	0.937246964	0.918650794	0.927855711
306	1	0	1	1	1	0.824742268	0.175257732	1	0.824289406	0.90368272	0.986062718	0.013937282	0.937246964	0.918650794	0.927855711
306	1	0	1	1	1	0.824742268	0.175257732	1	0.824289406	0.90368272	0.986062718	0.013937282	0.937246964	0.918650794	0.927855711
306	1	0	1	1	1	0.824742268	0.175257732	1	0.824289406	0.90368272	0.986062718	0.013937282	0.937246964	0.918650794	0.927855711
306	1	0	1	1	1	0.824742268	0.175257732	1	0.824289406	0.90368272	0.986062718	0.013937282	0.937246964	0.918650794	0.927855711
306	1	0	1	1	1	0.824742268	0.175257732	1	0.824289406	0.90368272	0.986062718	0.013937282	0.937246964	0.918650794	0.927855711
306	1	0	1	1	1	0.824742268	0.175257732	1	0.824289406	0.90368272	0.986062718	0.013937282	0.937246964	0.918650794	0.927855711
306	1	0	1	1	1	0.824742268	0.175257732	1	0.824289406	0.90368272	0.986062718	0.013937282	0.937246964	0.918650794	0.927855711
306	1	0	1	1	1	0.824742268	0.175257732	1	0.824289406	0.90368272	0.986062718	0.013937282	0.937246964	0.918650794	0.927855711
306	1	0	1	1	1	0.824742268	0.175257732	1	0.824289406	0.90368272	0.986062718	0.013937282	0.937246964	0.918650794	0.927855711
306	1	0	1	1	1	0.824742268	0.175257732	1	0.824289406	0.90368272	0.986062718	0.013937282	0.937246964	0.918650794	0.927855711
306	1	0	1	1	1	0.824742268	0.175257732	1	0.824289406	0.90368272	0.986062718	0.013937282	0.937246964	0.918650794	0.927855711
306	1	0	1	1	1	0.824742268	0.175257732	1	0.824289406	0.90368272	0.986062718	0.013937282	0.937246964	0.918650794	0.927855711
306	1	0	1	1	1	0.824742268	0.175257732	1	0.824289406	0.90368272	0.986062718	0.013937282	0.937246964	0.918650794	0.927855711
306	1	0	1	1	1	0.824742268	0.175257732	1	0.824289406	0.90368272	0.986062718	0.013937282	0.937246964	0.918650794	0.927855711
306	1	0	1	1	1	0.824742268	0.175257732	1	0.824289406	0.90368272	0.986062718	0.013937282	0.937246964	0.918650794	0.927855711
306	1	0	1	1	1	0.824742268	0.175257732	1	0.824289406	0.90368272	0.986062718	0.013937282	0.937246964	0.918650794	0.927855711
306	1	0	1	1	1	0.824742268	0.175257732	1	0.824289406	0.90368272	0.986062718	0.013937282	0.937246964	0.918650794	0.927855711
306	1	0	1	1	1	0.824742268	0.175257732	1	0.824289406	0.90368272	0.986062718	0.013937282	0.937246964	0.918650794	0.927855711
306	1	0	1	1	1	0.824742268	0.175257732	1	0.824289406	0.90368272	0.986062718	0.013937282	0.937246964	0.918650794	0.927855711
306	1	0	1	1	1	0.824742268	0.175257732	1	0.824289406	0.90368272	0.986062718	0.013937282	0.937246964	0.918650794	0.927855711
306	1	0	1	1	1	0.824742268	0.175257732	1	0.824289406	0.90368272	0.986062718	0.013937282	0.937246964	0.918650794	0.927855711
306	1	0	1	1	1	0.824742268	0.175257732	1	0.824289406	0.90368272	0.986062718	0.013937282	0.937246964	0.918650794	0.927855711
306	1	0	1	1	1	0.824742268	0.175257732	1	0.824289406	0.90368272	0.986062718	0.013937282	0.937246964	0.918650794	0.927855711
306	1	0	1	1	1	0.824742268	0.175257732	1	0.824289406	0.90368272	0.986062718	0.013937282	0.937246964	0.918650794	0.927855711
306	1	0	1	1	1	0.824742268	0.175257732	1	0.824289406	0.90368272	0.986062718	0.013937282	0.937246964	0.918650794	0.927855711
306	1	0	1	1	1	0.824742268	0.175257732	1	0.824289406	0.90368272	0.986062718	0.013937282	0.937246964	0.918650794	0.927855711
306	1	0	1	1	1	0.824742268	0.175257732	1	0.824289406	0.90368272	0.986062718	0.013937282	0.937246964	0.918650794	0.927855711
306	1	0	1	1	1	0.824742268	0.175257732	1	0.824289406	0.90368272	0.986062718	0.013937282	0.937246964	0.918650794	0.927855711
306	1	0	1	1	1	0.824742268	0.175257732	1	0.824289406	0.90368272	0.986062718	0.013937282	0.937246964	0.918650794	0.927855711
306	1	0	1	1	1	0.824742268	0.175257732	1	0.824289406	0.90368272	0.986062718	0.013937282	0.937246964	0.918650794	0.927855711
306	1	0	1	1	1	0.824742268	0.175257732	1	0.824289406	0.90368272	0.986062718	0.013937282	0.937246964	0.918650794	0.927855711
306	1	0	1	1	1	0.824742268	0.175257732	1	0.824289406	0.90368272	0.986062718	0.013937282	0.937246964	0.918650794	0.927855711
306	1	0	1	1	1	0.824742268	0.175257732	1	0.824289406	0.90368272	0.986062718	0.013937282	0.937246964	0.918650794	0.927855711
306	1	0	1	1	1	0.824742268	0.175257732	1	0.824289406	0.90368272	0.986062718	0.013937282	0.937246964	0.918650794	0.927855711
306	1	0	1	1	1	0.824742268	0.175257732	1	0.824289406	0.90368272	0.986062718	0.013937282	0.937246964	0.918650794	0.927855711
306	1	0	1	1	1	0.824742268	0.175257732	1	0.824289406	0.90368272	0.986062718	0.013937282	0.937246964	0.918650794	0.927855711
306	1	0	1	1	1	0.824742268	0.175257732	1	0.824289406	0.90368272	0.986062718	0.013937282	0.937246964	0.918650794	0.927855711
306	1	0	1	1	1	0.824742268	0.175257732	1	0.824289406	0.90368272	0.986062718	0.013937282	0.937246964	0.918650794	0.927855711
306	1	0	1	1	1	0.824742268	0.175257732	1	0.824289406	0.90368272	0.986062718	0.013937282	0.937246964	0.918650794	0.927855711
306	1	0	1	1	1	0.824742268	0.175257732	1	0.824289406	0.90368272	0.986062718	0.013937282	0.937246964	0.918650794	0.927855711
306	1	0	1	1	1	0.824742268	0.175257732	1	0.824289406	0.90368272	0.986062718	0.013937282	0.937246964	0.918650794	0.927855711
306	1	0	1	1	1	0.824742268	0.175257732	1	0.824289406	0.90368272	0.986062718	0.013937282	0.937246964	0.918650794	0.927855711
306	1	0	1	1	1	0.824742268	0.175257732	1	0.824289406	0.90368272	0.986062718	0.013937282	0.937246964	0.918650794	0.927855711
306	1	0	1	1	1	0.824742268	0.175257732	1	0.824289406	0.90368272	0.986062718	0.013937282	0.937246964	0.918650794	0.927855711
306	1	0	1	1	1	0.824742268	0.175257732	1	0.824289406	0.90368272	0.986062718	0.013937282	0.937246964	0.918650794	0.927855711
306	1	0	1	1	1	0.824742268	0.175257732	1	0.824289406	0.90368272	0.986062718	0.013937282	0.937246964	0.918650794	0.927855711
306	1	0	1	1	1	0.824742268	0.175257732	1	0.824289406	0.90368272	0.986062718	0.013937282	0.937246964	0.918650794	0.927855711
306	1	0	1	1	1	0.824742268	0.175257732	1	0.824289406	0.90368272	0.986062718	0.013937282	0.937246964	0.918650794	0.927855711
306	1	0	1	1	1	0.824742268	0.175257732	1	0.824289406	0.90368272	0.986062718	0.013937282	0.937246964	0.918650794	0.927855711
306	1	0	1	1	1	0.824742268	0.175257732	1	0.824289406	0.90368272	0.986062718	0.013937282	0.937246964	0.918650794	0.927855711
306	1	0	1	1	1	0.824742268	0.175257732	1	0.824289406	0.90368272	0.986062718	0.013937282	0.937246964	0.918650794	0.927855711
306	1	0	1	1	1	0.824742268	0.175257732	1	0.824289406	0.90368272	0.986062718	0.013937282	0.937246964	0.918650794	0.927855711
306	1	0	1	1	1	0.824742268	0.175257732	1	0.824289406	0.90368272	0.986062718	0.013937282	0.937246964	0.918650794	0.927855711
306	1	0	1	1	1	0.824742268	0.175257732	1	0.824289406	0.90368272	0.986062718	0.013937282	0.937246964	0.918650794	0.927855711
306	1	0	1	1	1	0.824742268	0.175257732	1	0.824289406	0.90368272	0.986062718	0.013937282	0.937246964	0.918650794	0.927855711
306	1	0	1	1	1	0.824742268	0.175257732	1	0.824289406	0.90368272	0.986062718	0.013937282	0.937246964	0.918650794	0.927855711
306	1	0	1	1	1	0.824742268	0.175257732	1	0.824289406	0.90368272	0.986062718	0.013937282	0.937246964	0.918650794	0.927855711
306	1	0	1	1	1	0.824742268	0.175257732	1	0.824289406	0.90368272	0.986062718	0.013937282	0.937246964	0.918650794	0.927855711
306	1	0	1	1	1	0.824742268	0.175257732	1	0.824289406	0.90368272	0.986062718	0.013937282	0.937246964	0.918650794	0.927855711
306	1	0	1	1	1	0.824742268	0.175257732	1	0.824289406	0.90368272	0.986062718	0.013937282	0.937246964	0.918650794	0.927855711
306	1	0	1	1	1	0.824742268	0.175257732	1	0.824289406	0.90368272	0.986062718	0.013937282	0.937246964	0.918650794	0.927855711
306	1	0	1	1	1	0.824742268	0.175257732	1	0.824289406	0.90368272	0.986062718	0.013937282	0.937246964	0.918650794	0.927855711
306	1	0	1	1	1	0.824742268	0.175257732	1	0.824289406	0.90368272	0.986062718	0.013937282	0.937246964	0.918650794	0.927855711
306	1	0	1	1	1	0.824742268	0.175257732	1	0.824289406	0.90368272	0.986062718	0.013937282	0.937246964	0.918650794	0.927855711
306	1	0	1	1	1	0.824742268	0.175257732	1	0.824289406	0.90368272	0.986062718	0.013937282	0.937246964	0.918650794	0.927855711
306	1	0	1	1	1	0.824742268	0.175257732	1	0.824289406	0.90368272	0.986062718	0.013937282	0.937246964	0.918650794	0.927855711
306	1	0	1	1	1	0.824742268	0.175257732	1	0.824289406	0.90368272	0.986062718	0.013937282	0.937246964	0.918650794	0.927855711
306	1	0	1	1	1	0.824742268	0.175257732	1	0.824289406	0.90368272	0.986062718	0.013937282	0.937246964	0.918650794	0.927855711
306	1	0	1	1	1	0.824742268	0.175257732	1	0.824289406	0.90368272	0.986062718	0.013937282	0.937246964	0.918650794	0.927855711
306	1	0	1	1	1	0.824742268	0.175257732	1	0.824289406	0.90368272	0.986062718	0.013937282	0.937246964	0.918650794	0.927855711
306	1	0	1	1	1	0.824742268	0.175257732	1	0.824289406	0.90368272	0.986062718	0.013937282	0.937246964	0.918650794	0.927855711
306	1	0	1	1	1	0.824742268	0.175257732	1	0.824289406	0.90368272	0.986062718	0.013937282	0.937246964	0.918650794	0.927855711
306	1	0	1	1	1	0.824742268	0.175257732	1	0.824289406	0.90368272	0.986062718	0.013937282	0.937246964	0.918650794	0.927855711
306	1	0	1	1	1	0.824742268	0.175257732	1	0.824289406	0.90368272	0.986062718	0.013937282	0.937246964	0.918650794	0.927855711
306	1	0	1	1	1	0.824742268	0.175257732	1	0.824289406	0.90368272	0.986062718	0.013937282	0.937246964	0.918650794	0.927855711
306	1	0	1	1	1	0.824742268	0.175257732	1	0.824289406	0.90368272	0.986062718	0.013937282	0.937246964	0.918650794	0.927855711
306	1	0	1	1	1	0.824742268	0.175257732	1	0.824289406	0.90368272	0.986062718	0.013937282	0.937246964	0.918650794	0.927855711
306	1	0	1	1	1	0.824742268	0.175257732	1	0.824289406	0.90368272	0.986062718	0.013937282	0.937246964	0.918650794	0.927855711
305	1	0	1	1	1	0.835948645	0.164051355	1	0.835948645	0.910644911	0.984244404	0.015755596	0.951819076	0.893813481	0.921904762
305	1	0	1	1	1	0.835948645	0.164051355	1	0.835948645	0.910644911	0.984244404	0.015755596	0.951819076	0.893813481	0.921904762
304	1	0	1	1	1	0.835694051	0.164305949	1	0.835694051	0.910493827	0.984331443	0.015668557	0.94980315	0.896007428	0.922121357
303	1	0	1	1	1	0.835714286	0.164285714	1	0.835714286	0.910505837	0.984341979	0.015658021	0.95280236	0.893911439	0.922417896
303	1	0	1	1	1	0.835714286	0.164285714	1	0.835714286	0.910505837	0.984341979	0.015658021	0.95280236	0.893911439	0.922417896
303	1	0	1	1	1	0.835714286	0.164285714	1	0.835714286	0.910505837	0.984341979	0.015658021	0.95280236	0.893911439	0.922417896
303	1	0	1	1	1	0.835714286	0.164285714	1	0.835714286	0.910505837	0.984341979	0.015658021	0.95280236	0.893911439	0.922417896
302	1	0	1	1	1	0.836647727	0.163352273	1	0.836647727	0.911059551	0.98433596	0.01566404	0.949950932	0.896296296	0.922343973
302	1	0	1	1	1	0.836647727	0.163352273	1	0.836647727	0.911059551	0.98433596	0.01566404	0.949950932	0.896296296	0.922343973
301	1	0	1	1	1	0.837681159	0.162318841	1	0.837681159	0.911671924	0.984452975	0.015547025	0.955078125	0.893967093	0.923512748
301	1	0	1	1	1	0.837681159	0.162318841	1	0.837681159	0.911671924	0.984452975	0.015547025	0.955078125	0.893967093	0.923512748
301	1	0	1	1	1	0.837681159	0.162318841	1	0.837681159	0.911671924	0.984452975	0.015547025	0.955078125	0.893967093	0.923512748
301	1	0	1	1	1	0.837681159	0.162318841	1	0.837681159	0.911671924	0.984452975	0.015547025	0.955078125	0.893967093	0.923512748
301	1	0	1	1	1	0.837681159	0.162318841	1	0.837681159	0.911671924	0.984452975	0.015547025	0.955078125	0.893967093	0.923512748
301	1	0	1	1	1	0.837681159	0.162318841	1	0.837681159	0.911671924	0.984452975	0.015547025	0.955078125	0.893967093	0.923512748
301	1	0	1	1	1	0.837681159	0.162318841	1	0.837681159	0.911671924	0.984452975	0.015547025	0.955078125	0.893967093	0.923512748
301	1	0	1	1	1	0.837681159	0.162318841	1	0.837681159	0.911671924	0.984452975	0.015547025	0.955078125	0.893967093	0.923512748
301	1	0	1	1	1	0.837681159	0.162318841	1	0.837681159	0.911671924	0.984452975	0.015547025	0.955078125	0.893967093	0.923512748
300	1	0	1	1	1	0.838896952	0.161103048	1	0.838896952	0.912391476	0.984454467	0.015545533	0.955121951	0.894063927	0.923584906
300	1	0	1	1	1	0.838896952	0.161103048	1	0.838896952	0.912391476	0.984454467	0.015545533	0.955121951	0.894063927	0.923584906
300	1	0	1	1	1	0.838896952	0.161103048	1	0.838896952	0.912391476	0.984454467	0.015545533	0.955121951	0.894063927	0.923584906
300	1	0	1	1	1	0.838896952	0.161103048	1	0.838896952	0.912391476	0.984454467	0.015545533	0.955121951	0.894063927	0.923584906
300	1	0	1	1	1	0.838896952	0.161103048	1	0.838896952	0.912391476	0.984454467	0.015545533	0.955121951	0.894063927	0.923584906
300	1	0	1	1	1	0.838896952	0.161103048	1	0.838896952	0.912391476	0.984454467	0.015545533	0.955121951	0.894063927	0.923584906
300	1	0	1	1	1	0.838896952	0.161103048	1	0.838896952	0.912391476	0.984454467	0.015545533	0.955121951	0.894063927	0.923584906
300	1	0	1	1	1	0.838896952	0.161103048	1	0.838896952	0.912391476	0.984454467	0.015545533	0.955121951	0.894063927	0.923584906
300	1	0	1	1	1	0.838896952	0.161103048	1	0.838896952	0.912391476	0.984454467	0.015545533	0.955121951	0.894063927	0.923584906
300	1	0	1	1	1	0.838896952	0.161103048	1	0.838896952	0.912391476	0.984454467	0.015545533	0.955121951	0.894063927	0.923584906
300	1	0	1	1	1	0.838896952	0.161103048	1	0.838896952	0.912391476	0.984454467	0.015545533	0.955121951	0.894063927	0.923584906
300	1	0	1	1	1	0.838896952	0.161103048	1	0.838896952	0.912391476	0.984454467	0.015545533	0.955121951	0.894063927	0.923584906
300	1	0	1	1	1	0.838896952	0.161103048	1	0.838896952	0.912391476	0.984454467	0.015545533	0.955121951	0.894063927	0.923584906
300	1	0	1	1	1	0.838896952	0.161103048	1	0.838896952	0.912391476	0.984454467	0.015545533	0.955121951	0.894063927	0.923584906
300	1	0	1	1	1	0.838896952	0.161103048	1	0.838896952	0.912391476	0.984454467	0.015545533	0.955121951	0.894063927	0.923584906
300	1	0	1	1	1	0.838896952	0.161103048	1	0.838896952	0.912391476	0.984454467	0.015545533	0.955121951	0.894063927	0.923584906
300	1	0	1	1	1	0.838896952	0.161103048	1	0.838896952	0.912391476	0.984454467	0.015545533	0.955121951	0.894063927	0.923584906
300	1	0	1	1	1	0.838896952	0.161103048	1	0.838896952	0.912391476	0.984454467	0.015545533	0.955121951	0.894063927	0.923584906
300	1	0	1	1	1	0.838896952	0.161103048	1	0.838896952	0.912391476	0.984454467	0.015545533	0.955121951	0.894063927	0.923584906
300	1	0	1	1	1	0.838896952	0.161103048	1	0.838896952	0.912391476	0.984454467	0.015545533	0.955121951	0.894063927	0.923584906
300	1	0	1	1	1	0.838896952	0.161103048	1	0.838896952	0.912391476	0.984454467	0.015545533	0.955121951	0.894063927	0.923584906
299	1	0	1	1	1	0.836363636	0.163636364	1	0.836134454	0.910755149	0.985088985	0.014911015	0.949852507	0.902803738	0.925730714
299	1	0	1	1	1	0.836363636	0.163636364	1	0.836134454	0.910755149	0.985088985	0.014911015	0.949852507	0.902803738	0.925730714
299	1	0	1	1	1	0.836363636	0.163636364	1	0.836134454	0.910755149	0.985088985	0.014911015	0.949852507	0.902803738	0.925730714
299	1	0	1	1	1	0.836363636	0.163636364	1	0.836134454	0.910755149	0.985088985	0.014911015	0.949852507	0.902803738	0.925730714
299	1	0	1	1	1	0.836363636	0.163636364	1	0.836134454	0.910755149	0.985088985	0.014911015	0.949852507	0.902803738	0.925730714
299	1	0	1	1	1	0.836363636	0.163636364	1	0.836134454	0.910755149	0.985088985	0.014911015	0.949852507	0.902803738	0.925730714
299	1	0	1	1	1	0.836363636	0.163636364	1	0.836134454	0.910755149	0.985088985	0.014911015	0.949852507	0.902803738	0.925730714
299	1	0	1	1	1	0.836363636	0.163636364	1	0.836134454	0.910755149	0.985088985	0.014911015	0.949852507	0.902803738	0.925730714
299	1	0	1	1	1	0.836363636	0.163636364	1	0.836134454	0.910755149	0.985088985	0.014911015	0.949852507	0.902803738	0.925730714
299	1	0	1	1	1	0.836363636	0.163636364	1	0.836134454	0.910755149	0.985088985	0.014911015	0.949852507	0.902803738	0.925730714
299	1	0	1	1	1	0.836363636	0.163636364	1	0.836134454	0.910755149	0.985088985	0.014911015	0.949852507	0.902803738	0.925730714
299	1	0	1	1	1	0.836363636	0.163636364	1	0.836134454	0.910755149	0.985088985	0.014911015	0.949852507	0.902803738	0.925730714
299	1	0	1	1	1	0.836363636	0.163636364	1	0.836134454	0.910755149	0.985088985	0.014911015	0.949852507	0.902803738	0.925730714
299	1	0	1	1	1	0.836363636	0.163636364	1	0.836134454	0.910755149	0.985088985	0.014911015	0.949852507	0.902803738	0.925730714
299	1	0	1	1	1	0.836363636	0.163636364	1	0.836134454	0.910755149	0.985088985	0.014911015	0.949852507	0.902803738	0.925730714
299	1	0	1	1	1	0.836363636	0.163636364	1	0.836134454	0.910755149	0.985088985	0.014911015	0.949852507	0.902803738	0.925730714
299	1	0	1	1	1	0.836363636	0.163636364	1	0.836134454	0.910755149	0.985088985	0.014911015	0.949852507	0.902803738	0.925730714
299	1	0	1	1	1	0.836363636	0.163636364	1	0.836134454	0.910755149	0.985088985	0.014911015	0.949852507	0.902803738	0.925730714
299	1	0	1	1	1	0.836363636	0.163636364	1	0.836134454	0.910755149	0.985088985	0.014911015	0.949852507	0.902803738	0.925730714
299	1	0	1	1	1	0.836363636	0.163636364	1	0.836134454	0.910755149	0.985088985	0.014911015	0.949852507	0.902803738	0.925730714
299	1	0	1	1	1	0.836363636	0.163636364	1	0.836134454	0.910755149	0.985088985	0.014911015	0.949852507	0.902803738	0.925730714
299	1	0	1	1	1	0.836363636	0.163636364	1	0.836134454	0.910755149	0.985088985	0.014911015	0.949852507	0.902803738	0.925730714
299	1	0	1	1	1	0.836363636	0.163636364	1	0.836134454	0.910755149	0.985088985	0.014911015	0.949852507	0.902803738	0.925730714
299	1	0	1	1	1	0.836363636	0.163636364	1	0.836134454	0.910755149	0.985088985	0.014911015	0.949852507	0.902803738	0.925730714
299	1	0	1	1	1	0.836363636	0.163636364	1	0.836134454	0.910755149	0.985088985	0.014911015	0.949852507	0.902803738	0.925730714
299	1	0	1	1	1	0.836363636	0.163636364	1	0.836134454	0.910755149	0.985088985	0.014911015	0.949852507	0.902803738	0.925730714
299	1	0	1	1	1	0.836363636	0.163636364	1	0.836134454	0.910755149	0.985088985	0.014911015	0.949852507	0.902803738	0.925730714
299	1	0	1	1	1	0.836363636	0.163636364	1	0.836134454	0.910755149	0.985088985	0.014911015	0.949852507	0.902803738	0.925730714
299	1	0	1	1	1	0.836363636	0.163636364	1	0.836134454	0.910755149	0.985088985	0.014911015	0.949852507	0.902803738	0.925730714
299	1	0	1	1	1	0.836363636	0.163636364	1	0.836134454	0.910755149	0.985088985	0.014911015	0.949852507	0.902803738	0.925730714
299	1	0	1	1	1	0.836363636	0.163636364	1	0.836134454	0.910755149	0.985088985	0.014911015	0.949852507	0.902803738	0.925730714
299	1	0	1	1	1	0.836363636	0.163636364	1	0.836134454	0.910755149	0.985088985	0.014911015	0.949852507	0.902803738	0.925730714
299	1	0	1	1	1	0.836363636	0.163636364	1	0.836134454	0.910755149	0.985088985	0.014911015	0.949852507	0.902803738	0.925730714
299	1	0	1	1	1	0.836363636	0.163636364	1	0.836134454	0.910755149	0.985088985	0.014911015	0.949852507	0.902803738	0.925730714
299	1	0	1	1	1	0.836363636	0.163636364	1	0.836134454	0.910755149	0.985088985	0.014911015	0.949852507	0.902803738	0.925730714
299	1	0	1	1	1	0.836363636	0.163636364	1	0.836134454	0.910755149	0.985088985	0.014911015	0.949852507	0.902803738	0.925730714
299	1	0	1	1	1	0.836363636	0.163636364	1	0.836134454	0.910755149	0.985088985	0.014911015	0.949852507	0.902803738	0.925730714
299	1	0	1	1	1	0.836363636	0.163636364	1	0.836134454	0.910755149	0.985088985	0.014911015	0.949852507	0.902803738	0.925730714
299	1	0	1	1	1	0.836363636	0.163636364	1	0.836134454	0.910755149	0.985088985	0.014911015	0.949852507	0.902803738	0.925730714
299	1	0	1	1	1	0.836363636	0.163636364	1	0.836134454	0.910755149	0.985088985	0.014911015	0.949852507	0.902803738	0.925730714
299	1	0	1	1	1	0.836363636	0.163636364	1	0.836134454	0.910755149	0.985088985	0.014911015	0.949852507	0.902803738	0.925730714
299	1	0	1	1	1	0.836363636	0.163636364	1	0.836134454	0.910755149	0.985088985	0.014911015	0.949852507	0.902803738	0.925730714
299	1	0	1	1	1	0.836363636	0.163636364	1	0.836134454	0.910755149	0.985088985	0.014911015	0.949852507	0.902803738	0.925730714
299	1	0	1	1	1	0.836363636	0.163636364	1	0.836134454	0.910755149	0.985088985	0.014911015	0.949852507	0.902803738	0.925730714
299	1	0	1	1	1	0.836363636	0.163636364	1	0.836134454	0.910755149	0.985088985	0.014911015	0.949852507	0.902803738	0.925730714
299	1	0	1	1	1	0.836363636	0.163636364	1	0.836134454	0.910755149	0.985088985	0.014911015	0.949852507	0.902803738	0.925730714
299	1	0	1	1	1	0.836363636	0.163636364	1	0.836134454	0.910755149	0.985088985	0.014911015	0.949852507	0.902803738	0.925730714
299	1	0	1	1	1	0.836363636	0.163636364	1	0.836134454	0.910755149	0.985088985	0.014911015	0.949852507	0.902803738	0.925730714
299	1	0	1	1	1	0.836363636	0.163636364	1	0.836134454	0.910755149	0.985088985	0.014911015	0.949852507	0.902803738	0.925730714
299	1	0	1	1	1	0.836363636	0.163636364	1	0.836134454	0.910755149	0.985088985	0.014911015	0.949852507	0.902803738	0.925730714
299	1	0	1	1	1	0.836363636	0.163636364	1	0.836134454	0.910755149	0.985088985	0.014911015	0.949852507	0.902803738	0.925730714
299	1	0	1	1	1	0.836363636	0.163636364	1	0.836134454	0.910755149	0.985088985	0.014911015	0.949852507	0.902803738	0.925730714
299	1	0	1	1	1	0.836363636	0.163636364	1	0.836134454	0.910755149	0.985088985	0.014911015	0.949852507	0.902803738	0.925730714
299	1	0	1	1	1	0.836363636	0.163636364	1	0.836134454	0.910755149	0.985088985	0.014911015	0.949852507	0.902803738	0.925730714
299	1	0	1	1	1	0.836363636	0.163636364	1	0.836134454	0.910755149	0.985088985	0.014911015	0.949852507	0.902803738	0.925730714
299	1	0	1	1	1	0.836363636	0.163636364	1	0.836134454	0.910755149	0.985088985	0.014911015	0.949852507	0.902803738	0.925730714
299	1	0	1	1	1	0.836363636	0.163636364	1	0.836134454	0.910755149	0.985088985	0.014911015	0.949852507	0.902803738	0.925730714
299	1	0	1	1	1	0.836363636	0.163636364	1	0.836134454	0.910755149	0.985088985	0.014911015	0.949852507	0.902803738	0.925730714
299	1	0	1	1	1	0.836363636	0.163636364	1	0.836134454	0.910755149	0.985088985	0.014911015	0.949852507	0.902803738	0.925730714
299	1	0	1	1	1	0.836363636	0.163636364	1	0.836134454	0.910755149	0.985088985	0.014911015	0.949852507	0.902803738	0.925730714
299	1	0	1	1	1	0.836363636	0.163636364	1	0.836134454	0.910755149	0.985088985	0.014911015	0.949852507	0.902803738	0.925730714
299	1	0	1	1	1	0.836363636	0.163636364	1	0.836134454	0.910755149	0.985088985	0.014911015	0.949852507	0.902803738	0.925730714
299	1	0	1	1	1	0.836363636	0.163636364	1	0.836134454	0.910755149	0.985088985	0.014911015	0.949852507	0.902803738	0.925730714
299	1	0	1	1	1	0.836363636	0.163636364	1	0.836134454	0.910755149	0.985088985	0.014911015	0.949852507	0.902803738	0.925730714
299	1	0	1	1	1	0.836363636	0.163636364	1	0.836134454	0.910755149	0.985088985	0.014911015	0.949852507	0.902803738	0.925730714
299	1	0	1	1	1	0.836363636	0.163636364	1	0.836134454	0.910755149	0.985088985	0.014911015	0.949852507	0.902803738	0.925730714
299	1	0	1	1	1	0.836363636	0.163636364	1	0.836134454	0.910755149	0.985088985	0.014911015	0.949852507	0.902803738	0.925730714
299	1	0	1	1	1	0.836363636	0.163636364	1	0.836134454	0.910755149	0.985088985	0.014911015	0.949852507	0.902803738	0.925730714
299	1	0	1	1	1	0.836363636	0.163636364	1	0.836134454	0.910755149	0.985088985	0.014911015	0.949852507	0.902803738	0.925730714
299	1	0	1	1	1	0.836363636	0.163636364	1	0.836134454	0.910755149	0.985088985	0.014911015	0.949852507	0.902803738	0.925730714
299	1	0	1	1	1	0.836363636	0.163636364	1	0.836134454	0.910755149	0.985088985	0.014911015	0.949852507	0.902803738	0.925730714
299	1	0	1	1	1	0.836363636	0.163636364	1	0.836134454	0.910755149	0.985088985	0.014911015	0.949852507	0.902803738	0.925730714
299	1	0	1	1	1	0.836363636	0.163636364	1	0.836134454	0.910755149	0.985088985	0.014911015	0.949852507	0.902803738	0.925730714
299	1	0	1	1	1	0.836363636	0.163636364	1	0.836134454	0.910755149	0.985088985	0.014911015	0.949852507	0.902803738	0.925730714
299	1	0	1	1	1	0.836363636	0.163636364	1	0.836134454	0.910755149	0.985088985	0.014911015	0.949852507	0.902803738	0.925730714
299	1	0	1	1	1	0.836363636	0.163636364	1	0.836134454	0.910755149	0.985088985	0.014911015	0.949852507	0.902803738	0.925730714
299	1	0	1	1	1	0.836363636	0.163636364	1	0.836134454	0.910755149	0.985088985	0.014911015	0.949852507	0.902803738	0.925730714
299	1	0	1	1	1	0.836363636	0.163636364	1	0.836134454	0.910755149	0.985088985	0.014911015	0.949852507	0.902803738	0.925730714
299	1	0	1	1	1	0.836363636	0.163636364	1	0.836134454	0.910755149	0.985088985	0.014911015	0.949852507	0.902803738	0.925730714
299	1	0	1	1	1	0.836363636	0.163636364	1	0.836134454	0.910755149	0.985088985	0.014911015	0.949852507	0.902803738	0.925730714
299	1	0	1	1	1	0.836363636	0.163636364	1	0.836134454	0.910755149	0.985088985	0.014911015	0.949852507	0.902803738	0.925730714
299	1	0	1	1	1	0.836363636	0.163636364	1	0.836134454	0.910755149	0.985088985	0.014911015	0.949852507	0.902803738	0.925730714
299	1	0	1	1	1	0.836363636	0.163636364	1	0.836134454	0.910755149	0.985088985	0.014911015	0.949852507	0.902803738	0.925730714
299	1	0	1	1	1	0.836363636	0.163636364	1	0.836134454	0.910755149	0.985088985	0.014911015	0.949852507	0.902803738	0.925730714
299	1	0	1	1	1	0.836363636	0.163636364	1	0.836134454	0.910755149	0.985088985	0.014911015	0.949852507	0.902803738	0.925730714
299	1	0	1	1	1	0.836363636	0.163636364	1	0.836134454	0.910755149	0.985088985	0.014911015	0.949852507	0.902803738	0.925730714
299	1	0	1	1	1	0.836363636	0.163636364	1	0.836134454	0.910755149	0.985088985	0.014911015	0.949852507	0.902803738	0.925730714
299	1	0	1	1	1	0.836363636	0.163636364	1	0.836134454	0.910755149	0.985088985	0.014911015	0.949852507	0.902803738	0.925730714
299	1	0	1	1	1	0.836363636	0.163636364	1	0.836134454	0.910755149	0.985088985	0.014911015	0.949852507	0.902803738	0.925730714
299	1	0	1	1	1	0.836363636	0.163636364	1	0.836134454	0.910755149	0.985088985	0.014911015	0.949852507	0.902803738	0.925730714
299	1	0	1	1	1	0.836363636	0.163636364	1	0.836134454	0.910755149	0.985088985	0.014911015	0.949852507	0.902803738	0.925730714
299	1	0	1	1	1	0.836363636	0.163636364	1	0.836134454	0.910755149	0.985088985	0.014911015	0.949852507	0.902803738	0.925730714
299	1	0	1	1	1	0.836363636	0.163636364	1	0.836134454	0.910755149	0.985088985	0.014911015	0.949852507	0.902803738	0.925730714
299	1	0	1	1	1	0.836363636	0.163636364	1	0.836134454	0.910755149	0.985088985	0.014911015	0.949852507	0.902803738	0.925730714
299	1	0	1	1	1	0.836363636	0.163636364	1	0.836134454	0.910755149	0.985088985	0.014911015	0.949852507	0.902803738	0.925730714
299	1	0	1	1	1	0.836363636	0.163636364	1	0.836134454	0.910755149	0.985088985	0.014911015	0.949852507	0.902803738	0.925730714
299	1	0	1	1	1	0.836363636	0.163636364	1	0.836134454	0.910755149	0.985088985	0.014911015	0.949852507	0.902803738	0.925730714
299	1	0	1	1	1	0.836363636	0.163636364	1	0.836134454	0.910755149	0.985088985	0.014911015	0.949852507	0.902803738	0.925730714
299	1	0	1	1	1	0.836363636	0.163636364	1	0.836134454	0.910755149	0.985088985	0.014911015	0.949852507	0.902803738	0.925730714
299	1	0	1	1	1	0.836363636	0.163636364	1	0.836134454	0.910755149	0.985088985	0.014911015	0.949852507	0.902803738	0.925730714
299	1	0	1	1	1	0.836363636	0.163636364	1	0.836134454	0.910755149	0.985088985	0.014911015	0.949852507	0.902803738	0.925730714
299	1	0	1	1	1	0.836363636	0.163636364	1	0.836134454	0.910755149	0.985088985	0.014911015	0.949852507	0.902803738	0.925730714
299	1	0	1	1	1	0.836363636	0.163636364	1	0.836134454	0.910755149	0.985088985	0.014911015	0.949852507	0.902803738	0.925730714
299	1	0	1	1	1	0.836363636	0.163636364	1	0.836134454	0.910755149	0.985088985	0.014911015	0.949852507	0.902803738	0.925730714
299	1	0	1	1	1	0.836363636	0.163636364	1	0.836134454	0.910755149	0.985088985	0.014911015	0.949852507	0.902803738	0.925730714
299	1	0	1	1	1	0.836363636	0.163636364	1	0.836134454	0.910755149	0.985088985	0.014911015	0.949852507	0.902803738	0.925730714
299	1	0	1	1	1	0.836363636	0.163636364	1	0.836134454	0.910755149	0.985088985	0.014911015	0.949852507	0.902803738	0.925730714
299	1	0	1	1	1	0.836363636	0.163636364	1	0.836134454	0.910755149	0.985088985	0.014911015	0.949852507	0.902803738	0.925730714
299	1	0	1	1	1	0.836363636	0.163636364	1	0.836134454	0.910755149	0.985088985	0.014911015	0.949852507	0.902803738	0.925730714
299	1	0	1	1	1	0.836363636	0.163636364	1	0.836134454	0.910755149	0.985088985	0.014911015	0.949852507	0.902803738	0.925730714
299	1	0	1	1	1	0.836363636	0.163636364	1	0.836134454	0.910755149	0.985088985	0.014911015	0.949852507	0.902803738	0.925730714
299	1	0	1	1	1	0.836363636	0.163636364	1	0.836134454	0.910755149	0.985088985	0.014911015	0.949852507	0.902803738	0.925730714
299	1	0	1	1	1	0.836363636	0.163636364	1	0.836134454	0.910755149	0.985088985	0.014911015	0.949852507	0.902803738	0.925730714
299	1	0	1	1	1	0.836363636	0.163636364	1	0.836134454	0.910755149	0.985088985	0.014911015	0.949852507	0.902803738	0.925730714
299	1	0	1	1	1	0.836363636	0.163636364	1	0.836134454	0.910755149	0.985088985	0.014911015	0.949852507	0.902803738	0.925730714
299	1	0	1	1	1	0.836363636	0.163636364	1	0.836134454	0.910755149	0.985088985	0.014911015	0.949852507	0.902803738	0.925730714
299	1	0	1	1	1	0.836363636	0.163636364	1	0.836134454	0.910755149	0.985088985	0.014911015	0.949852507	0.902803738	0.925730714
299	1	0	1	1	1	0.836363636	0.163636364	1	0.836134454	0.910755149	0.985088985	0.014911015	0.949852507	0.902803738	0.925730714
299	1	0	1	1	1	0.836363636	0.163636364	1	0.836134454	0.910755149	0.985088985	0.014911015	0.949852507	0.902803738	0.925730714
299	1	0	1	1	1	0.836363636	0.163636364	1	0.836134454	0.910755149	0.985088985	0.014911015	0.949852507	0.902803738	0.925730714
299	1	0	1	1	1	0.836363636	0.163636364	1	0.836134454	0.910755149	0.985088985	0.014911015	0.949852507	0.902803738	0.925730714
299	1	0	1	1	1	0.836363636	0.163636364	1	0.836134454	0.910755149	0.985088985	0.014911015	0.949852507	0.902803738	0.925730714
299	1	0	1	1	1	0.836363636	0.163636364	1	0.836134454	0.910755149	0.985088985	0.014911015	0.949852507	0.902803738	0.925730714
299	1	0	1	1	1	0.836363636	0.163636364	1	0.836134454	0.910755149	0.985088985	0.014911015	0.949852507	0.902803738	0.925730714
299	1	0	1	1	1	0.836363636	0.163636364	1	0.836134454	0.910755149	0.985088985	0.014911015	0.949852507	0.902803738	0.925730714
299	1	0	1	1	1	0.836363636	0.163636364	1	0.836134454	0.910755149	0.985088985	0.014911015	0.949852507	0.902803738	0.925730714
299	1	0	1	1	1	0.836363636	0.163636364	1	0.836134454	0.910755149	0.985088985	0.014911015	0.949852507	0.902803738	0.925730714
299	1	0	1	1	1	0.836363636	0.163636364	1	0.836134454	0.910755149	0.985088985	0.014911015	0.949852507	0.902803738	0.925730714
299	1	0	1	1	1	0.836363636	0.163636364	1	0.836134454	0.910755149	0.985088985	0.014911015	0.949852507	0.902803738	0.925730714
299	1	0	1	1	1	0.836363636	0.163636364	1	0.836134454	0.910755149	0.985088985	0.014911015	0.949852507	0.902803738	0.925730714
299	1	0	1	1	1	0.836363636	0.163636364	1	0.836134454	0.910755149	0.985088985	0.014911015	0.949852507	0.902803738	0.925730714
299	1	0	1	1	1	0.836363636	0.163636364	1	0.836134454	0.910755149	0.985088985	0.014911015	0.949852507	0.902803738	0.925730714
299	1	0	1	1	1	0.836363636	0.163636364	1	0.836134454	0.910755149	0.985088985	0.014911015	0.949852507	0.902803738	0.925730714
299	1	0	1	1	1	0.836363636	0.163636364	1	0.836134454	0.910755149	0.985088985	0.014911015	0.949852507	0.902803738	0.925730714
299	1	0	1	1	1	0.836363636	0.163636364	1	0.836134454	0.910755149	0.985088985	0.014911015	0.949852507	0.902803738	0.925730714
299	1	0	1	1	1	0.836363636	0.163636364	1	0.836134454	0.910755149	0.985088985	0.014911015	0.949852507	0.902803738	0.925730714
299	1	0	1	1	1	0.836363636	0.163636364	1	0.836134454	0.910755149	0.985088985	0.014911015	0.949852507	0.902803738	0.925730714
299	1	0	1	1	1	0.836363636	0.163636364	1	0.836134454	0.910755149	0.985088985	0.014911015	0.949852507	0.902803738	0.925730714
299	1	0	1	1	1	0.836363636	0.163636364	1	0.836134454	0.910755149	0.985088985	0.014911015	0.949852507	0.902803738	0.925730714
299	1	0	1	1	1	0.836363636	0.163636364	1	0.836134454	0.910755149	0.985088985	0.014911015	0.949852507	0.902803738	0.925730714
299	1	0	1	1	1	0.836363636	0.163636364	1	0.836134454	0.910755149	0.985088985	0.014911015	0.949852507	0.902803738	0.925730714
299	1	0	1	1	1	0.836363636	0.163636364	1	0.836134454	0.910755149	0.985088985	0.014911015	0.949852507	0.902803738	0.925730714
299	1	0	1	1	1	0.836363636	0.163636364	1	0.836134454	0.910755149	0.985088985	0.014911015	0.949852507	0.902803738	0.925730714
299	1	0	1	1	1	0.836363636	0.163636364	1	0.836134454	0.910755149	0.985088985	0.014911015	0.949852507	0.902803738	0.925730714
299	1	0	1	1	1	0.836363636	0.163636364	1	0.836134454	0.910755149	0.985088985	0.014911015	0.949852507	0.902803738	0.925730714
299	1	0	1	1	1	0.836363636	0.163636364	1	0.836134454	0.910755149	0.985088985	0.014911015	0.949852507	0.902803738	0.925730714
299	1	0	1	1	1	0.836363636	0.163636364	1	0.836134454	0.910755149	0.985088985	0.014911015	0.949852507	0.902803738	0.925730714
299	1	0	1	1	1	0.836363636	0.163636364	1	0.836134454	0.910755149	0.985088985	0.014911015	0.949852507	0.902803738	0.925730714
299	1	0	1	1	1	0.836363636	0.163636364	1	0.836134454	0.910755149	0.985088985	0.014911015	0.949852507	0.902803738	0.925730714
299	1	0	1	1	1	0.836363636	0.163636364	1	0.836134454	0.910755149	0.985088985	0.014911015	0.949852507	0.902803738	0.925730714
299	1	0	1	1	1	0.836363636	0.163636364	1	0.836134454	0.910755149	0.985088985	0.014911015	0.949852507	0.902803738	0.925730714
299	1	0	1	1	1	0.836363636	0.163636364	1	0.836134454	0.910755149	0.985088985	0.014911015	0.949852507	0.902803738	0.925730714
299	1	0	1	1	1	0.836363636	0.163636364	1	0.836134454	0.910755149	0.985088985	0.014911015	0.949852507	0.902803738	0.925730714
299	1	0	1	1	1	0.836363636	0.163636364	1	0.836134454	0.910755149	0.985088985	0.014911015	0.949852507	0.902803738	0.925730714
299	1	0	1	1	1	0.836363636	0.163636364	1	0.836134454	0.910755149	0.985088985	0.014911015	0.949852507	0.902803738	0.925730714
299	1	0	1	1	1	0.836363636	0.163636364	1	0.836134454	0.910755149	0.985088985	0.014911015	0.949852507	0.902803738	0.925730714
299	1	0	1	1	1	0.836363636	0.163636364	1	0.836134454	0.910755149	0.985088985	0.014911015	0.949852507	0.902803738	0.925730714
299	1	0	1	1	1	0.836363636	0.163636364	1	0.836134454	0.910755149	0.985088985	0.014911015	0.949852507	0.902803738	0.925730714
299	1	0	1	1	1	0.836363636	0.163636364	1	0.836134454	0.910755149	0.985088985	0.014911015	0.949852507	0.902803738	0.925730714
299	1	0	1	1	1	0.836363636	0.163636364	1	0.836134454	0.910755149	0.985088985	0.014911015	0.949852507	0.902803738	0.925730714
299	1	0	1	1	1	0.836363636	0.163636364	1	0.836134454	0.910755149	0.985088985	0.014911015	0.949852507	0.902803738	0.925730714
299	1	0	1	1	1	0.836363636	0.163636364	1	0.836134454	0.910755149	0.985088985	0.014911015	0.949852507	0.902803738	0.925730714
299	1	0	1	1	1	0.836363636	0.163636364	1	0.836134454	0.910755149	0.985088985	0.014911015	0.949852507	0.902803738	0.925730714
299	1	0	1	1	1	0.836363636	0.163636364	1	0.836134454	0.910755149	0.985088985	0.014911015	0.949852507	0.902803738	0.925730714
299	1	0	1	1	1	0.836363636	0.163636364	1	0.836134454	0.910755149	0.985088985	0.014911015	0.949852507	0.902803738	0.925730714
