# Supplementary material for: An Improved Hybrid Feature Selection Algorithm for Electric Charge Recovery Risk
Source: Hindawi journal article supplement (doi:10.1155/2020/8479341), 2020-08-28
Supplement: f1 [file 8479341.f1.zip › 8479341.f1/Experimental Results/201808/BPSO_results.csv]

features_num	Accuracy_high	Loss_high	Precission_high	Recall_high	F1_high	Accuracy_med	Loss_med	Precission_med	Recall_med	F1_med	Accuracy_low	Loss_low	Precission_low	Recall_low	F1_low
374	1.0	0.0	1.0	1.0	1.0	0.7026800670016751	0.29731993299832493	0.80042689434365	0.8169934640522876	0.8086253369272237	0.8442731054073247	0.1557268945926753	0.3424242424242424	0.9801734820322181	0.5075393006095604
363	1.0	0.0	1.0	1.0	1.0	0.8504837291116975	0.14951627088830255	0.9659442724458205	0.8723205964585274	0.9167482859941234	0.9058126468485034	0.09418735315149662	0.357606344628695	0.9411764705882353	0.5182863113897597
363	1.0	0.0	1.0	1.0	1.0	0.8504837291116975	0.14951627088830255	0.9659442724458205	0.8723205964585274	0.9167482859941234	0.9058126468485034	0.09418735315149662	0.357606344628695	0.9411764705882353	0.5182863113897597
363	1.0	0.0	1.0	1.0	1.0	0.8504837291116975	0.14951627088830255	0.9659442724458205	0.8723205964585274	0.9167482859941234	0.9058126468485034	0.09418735315149662	0.357606344628695	0.9411764705882353	0.5182863113897597
363	1.0	0.0	1.0	1.0	1.0	0.8504837291116975	0.14951627088830255	0.9659442724458205	0.8723205964585274	0.9167482859941234	0.9058126468485034	0.09418735315149662	0.357606344628695	0.9411764705882353	0.5182863113897597
363	1.0	0.0	1.0	1.0	1.0	0.8504837291116975	0.14951627088830255	0.9659442724458205	0.8723205964585274	0.9167482859941234	0.9058126468485034	0.09418735315149662	0.357606344628695	0.9411764705882353	0.5182863113897597
378	1.0	0.0	1.0	1.0	1.0	0.8770685579196218	0.1229314420803782	0.9666221628838452	0.9016189290161893	0.9329896907216495	0.9364766226080095	0.06352337739199054	0.6071065989847716	0.6994152046783626	0.65
378	1.0	0.0	1.0	1.0	1.0	0.8770685579196218	0.1229314420803782	0.9666221628838452	0.9016189290161893	0.9329896907216495	0.9364766226080095	0.06352337739199054	0.6071065989847716	0.6994152046783626	0.65
378	1.0	0.0	1.0	1.0	1.0	0.8770685579196218	0.1229314420803782	0.9666221628838452	0.9016189290161893	0.9329896907216495	0.9364766226080095	0.06352337739199054	0.6071065989847716	0.6994152046783626	0.65
398	1.0	0.0	1.0	1.0	1.0	0.8706118355065195	0.12938816449348045	0.9839449541284404	0.881808838643371	0.9300813008130081	0.943706956782114	0.056293043217885974	0.5642317380352645	0.9372384937238494	0.7044025157232705
398	1.0	0.0	1.0	1.0	1.0	0.8706118355065195	0.12938816449348045	0.9839449541284404	0.881808838643371	0.9300813008130081	0.943706956782114	0.056293043217885974	0.5642317380352645	0.9372384937238494	0.7044025157232705
398	1.0	0.0	1.0	1.0	1.0	0.8706118355065195	0.12938816449348045	0.9839449541284404	0.881808838643371	0.9300813008130081	0.943706956782114	0.056293043217885974	0.5642317380352645	0.9372384937238494	0.7044025157232705
398	1.0	0.0	1.0	1.0	1.0	0.8706118355065195	0.12938816449348045	0.9839449541284404	0.881808838643371	0.9300813008130081	0.943706956782114	0.056293043217885974	0.5642317380352645	0.9372384937238494	0.7044025157232705
398	1.0	0.0	1.0	1.0	1.0	0.8706118355065195	0.12938816449348045	0.9839449541284404	0.881808838643371	0.9300813008130081	0.943706956782114	0.056293043217885974	0.5642317380352645	0.9372384937238494	0.7044025157232705
398	1.0	0.0	1.0	1.0	1.0	0.8706118355065195	0.12938816449348045	0.9839449541284404	0.881808838643371	0.9300813008130081	0.943706956782114	0.056293043217885974	0.5642317380352645	0.9372384937238494	0.7044025157232705
398	1.0	0.0	1.0	1.0	1.0	0.8706118355065195	0.12938816449348045	0.9839449541284404	0.881808838643371	0.9300813008130081	0.943706956782114	0.056293043217885974	0.5642317380352645	0.9372384937238494	0.7044025157232705
398	1.0	0.0	1.0	1.0	1.0	0.8706118355065195	0.12938816449348045	0.9839449541284404	0.881808838643371	0.9300813008130081	0.943706956782114	0.056293043217885974	0.5642317380352645	0.9372384937238494	0.7044025157232705
398	1.0	0.0	1.0	1.0	1.0	0.8706118355065195	0.12938816449348045	0.9839449541284404	0.881808838643371	0.9300813008130081	0.943706956782114	0.056293043217885974	0.5642317380352645	0.9372384937238494	0.7044025157232705
398	1.0	0.0	1.0	1.0	1.0	0.8706118355065195	0.12938816449348045	0.9839449541284404	0.881808838643371	0.9300813008130081	0.943706956782114	0.056293043217885974	0.5642317380352645	0.9372384937238494	0.7044025157232705
398	1.0	0.0	1.0	1.0	1.0	0.8706118355065195	0.12938816449348045	0.9839449541284404	0.881808838643371	0.9300813008130081	0.943706956782114	0.056293043217885974	0.5642317380352645	0.9372384937238494	0.7044025157232705
398	1.0	0.0	1.0	1.0	1.0	0.8706118355065195	0.12938816449348045	0.9839449541284404	0.881808838643371	0.9300813008130081	0.943706956782114	0.056293043217885974	0.5642317380352645	0.9372384937238494	0.7044025157232705
398	1.0	0.0	1.0	1.0	1.0	0.8706118355065195	0.12938816449348045	0.9839449541284404	0.881808838643371	0.9300813008130081	0.943706956782114	0.056293043217885974	0.5642317380352645	0.9372384937238494	0.7044025157232705
398	1.0	0.0	1.0	1.0	1.0	0.8706118355065195	0.12938816449348045	0.9839449541284404	0.881808838643371	0.9300813008130081	0.943706956782114	0.056293043217885974	0.5642317380352645	0.9372384937238494	0.7044025157232705
389	1.0	0.0	1.0	1.0	1.0	0.8991130820399114	0.10088691796008864	0.9876998769987699	0.9083710407239819	0.9463759575721861	0.9442412259021256	0.05575877409787444	0.6074270557029178	0.8513011152416357	0.7089783281733746
389	1.0	0.0	1.0	1.0	1.0	0.8991130820399114	0.10088691796008864	0.9876998769987699	0.9083710407239819	0.9463759575721861	0.9442412259021256	0.05575877409787444	0.6074270557029178	0.8513011152416357	0.7089783281733746
389	1.0	0.0	1.0	1.0	1.0	0.8991130820399114	0.10088691796008864	0.9876998769987699	0.9083710407239819	0.9463759575721861	0.9442412259021256	0.05575877409787444	0.6074270557029178	0.8513011152416357	0.7089783281733746
389	1.0	0.0	1.0	1.0	1.0	0.8991130820399114	0.10088691796008864	0.9876998769987699	0.9083710407239819	0.9463759575721861	0.9442412259021256	0.05575877409787444	0.6074270557029178	0.8513011152416357	0.7089783281733746
389	1.0	0.0	1.0	1.0	1.0	0.8991130820399114	0.10088691796008864	0.9876998769987699	0.9083710407239819	0.9463759575721861	0.9442412259021256	0.05575877409787444	0.6074270557029178	0.8513011152416357	0.7089783281733746
389	1.0	0.0	1.0	1.0	1.0	0.8991130820399114	0.10088691796008864	0.9876998769987699	0.9083710407239819	0.9463759575721861	0.9442412259021256	0.05575877409787444	0.6074270557029178	0.8513011152416357	0.7089783281733746
389	1.0	0.0	1.0	1.0	1.0	0.8991130820399114	0.10088691796008864	0.9876998769987699	0.9083710407239819	0.9463759575721861	0.9442412259021256	0.05575877409787444	0.6074270557029178	0.8513011152416357	0.7089783281733746
389	1.0	0.0	1.0	1.0	1.0	0.8991130820399114	0.10088691796008864	0.9876998769987699	0.9083710407239819	0.9463759575721861	0.9442412259021256	0.05575877409787444	0.6074270557029178	0.8513011152416357	0.7089783281733746
389	1.0	0.0	1.0	1.0	1.0	0.8991130820399114	0.10088691796008864	0.9876998769987699	0.9083710407239819	0.9463759575721861	0.9442412259021256	0.05575877409787444	0.6074270557029178	0.8513011152416357	0.7089783281733746
389	1.0	0.0	1.0	1.0	1.0	0.8991130820399114	0.10088691796008864	0.9876998769987699	0.9083710407239819	0.9463759575721861	0.9442412259021256	0.05575877409787444	0.6074270557029178	0.8513011152416357	0.7089783281733746
389	1.0	0.0	1.0	1.0	1.0	0.8991130820399114	0.10088691796008864	0.9876998769987699	0.9083710407239819	0.9463759575721861	0.9442412259021256	0.05575877409787444	0.6074270557029178	0.8513011152416357	0.7089783281733746
389	1.0	0.0	1.0	1.0	1.0	0.8991130820399114	0.10088691796008864	0.9876998769987699	0.9083710407239819	0.9463759575721861	0.9442412259021256	0.05575877409787444	0.6074270557029178	0.8513011152416357	0.7089783281733746
389	1.0	0.0	1.0	1.0	1.0	0.8991130820399114	0.10088691796008864	0.9876998769987699	0.9083710407239819	0.9463759575721861	0.9442412259021256	0.05575877409787444	0.6074270557029178	0.8513011152416357	0.7089783281733746
389	1.0	0.0	1.0	1.0	1.0	0.8991130820399114	0.10088691796008864	0.9876998769987699	0.9083710407239819	0.9463759575721861	0.9442412259021256	0.05575877409787444	0.6074270557029178	0.8513011152416357	0.7089783281733746
389	1.0	0.0	1.0	1.0	1.0	0.8991130820399114	0.10088691796008864	0.9876998769987699	0.9083710407239819	0.9463759575721861	0.9442412259021256	0.05575877409787444	0.6074270557029178	0.8513011152416357	0.7089783281733746
389	1.0	0.0	1.0	1.0	1.0	0.8991130820399114	0.10088691796008864	0.9876998769987699	0.9083710407239819	0.9463759575721861	0.9442412259021256	0.05575877409787444	0.6074270557029178	0.8513011152416357	0.7089783281733746
389	1.0	0.0	1.0	1.0	1.0	0.8991130820399114	0.10088691796008864	0.9876998769987699	0.9083710407239819	0.9463759575721861	0.9442412259021256	0.05575877409787444	0.6074270557029178	0.8513011152416357	0.7089783281733746
389	1.0	0.0	1.0	1.0	1.0	0.8991130820399114	0.10088691796008864	0.9876998769987699	0.9083710407239819	0.9463759575721861	0.9442412259021256	0.05575877409787444	0.6074270557029178	0.8513011152416357	0.7089783281733746
389	1.0	0.0	1.0	1.0	1.0	0.8991130820399114	0.10088691796008864	0.9876998769987699	0.9083710407239819	0.9463759575721861	0.9442412259021256	0.05575877409787444	0.6074270557029178	0.8513011152416357	0.7089783281733746
347	1.0	0.0	1.0	1.0	1.0	0.887308533916849	0.11269146608315095	0.9754901960784313	0.9055745164960182	0.9392330383480826	0.9500198333994446	0.049980166600555376	0.6248919619706137	0.9117276166456494	0.7415384615384616
347	1.0	0.0	1.0	1.0	1.0	0.887308533916849	0.11269146608315095	0.9754901960784313	0.9055745164960182	0.9392330383480826	0.9500198333994446	0.049980166600555376	0.6248919619706137	0.9117276166456494	0.7415384615384616
347	1.0	0.0	1.0	1.0	1.0	0.887308533916849	0.11269146608315095	0.9754901960784313	0.9055745164960182	0.9392330383480826	0.9500198333994446	0.049980166600555376	0.6248919619706137	0.9117276166456494	0.7415384615384616
347	1.0	0.0	1.0	1.0	1.0	0.887308533916849	0.11269146608315095	0.9754901960784313	0.9055745164960182	0.9392330383480826	0.9500198333994446	0.049980166600555376	0.6248919619706137	0.9117276166456494	0.7415384615384616
347	1.0	0.0	1.0	1.0	1.0	0.887308533916849	0.11269146608315095	0.9754901960784313	0.9055745164960182	0.9392330383480826	0.9500198333994446	0.049980166600555376	0.6248919619706137	0.9117276166456494	0.7415384615384616
347	1.0	0.0	1.0	1.0	1.0	0.887308533916849	0.11269146608315095	0.9754901960784313	0.9055745164960182	0.9392330383480826	0.9500198333994446	0.049980166600555376	0.6248919619706137	0.9117276166456494	0.7415384615384616
347	1.0	0.0	1.0	1.0	1.0	0.887308533916849	0.11269146608315095	0.9754901960784313	0.9055745164960182	0.9392330383480826	0.9500198333994446	0.049980166600555376	0.6248919619706137	0.9117276166456494	0.7415384615384616
347	1.0	0.0	1.0	1.0	1.0	0.887308533916849	0.11269146608315095	0.9754901960784313	0.9055745164960182	0.9392330383480826	0.9500198333994446	0.049980166600555376	0.6248919619706137	0.9117276166456494	0.7415384615384616
347	1.0	0.0	1.0	1.0	1.0	0.887308533916849	0.11269146608315095	0.9754901960784313	0.9055745164960182	0.9392330383480826	0.9500198333994446	0.049980166600555376	0.6248919619706137	0.9117276166456494	0.7415384615384616
347	1.0	0.0	1.0	1.0	1.0	0.887308533916849	0.11269146608315095	0.9754901960784313	0.9055745164960182	0.9392330383480826	0.9500198333994446	0.049980166600555376	0.6248919619706137	0.9117276166456494	0.7415384615384616
347	1.0	0.0	1.0	1.0	1.0	0.887308533916849	0.11269146608315095	0.9754901960784313	0.9055745164960182	0.9392330383480826	0.9500198333994446	0.049980166600555376	0.6248919619706137	0.9117276166456494	0.7415384615384616
347	1.0	0.0	1.0	1.0	1.0	0.887308533916849	0.11269146608315095	0.9754901960784313	0.9055745164960182	0.9392330383480826	0.9500198333994446	0.049980166600555376	0.6248919619706137	0.9117276166456494	0.7415384615384616
347	1.0	0.0	1.0	1.0	1.0	0.887308533916849	0.11269146608315095	0.9754901960784313	0.9055745164960182	0.9392330383480826	0.9500198333994446	0.049980166600555376	0.6248919619706137	0.9117276166456494	0.7415384615384616
347	1.0	0.0	1.0	1.0	1.0	0.887308533916849	0.11269146608315095	0.9754901960784313	0.9055745164960182	0.9392330383480826	0.9500198333994446	0.049980166600555376	0.6248919619706137	0.9117276166456494	0.7415384615384616
347	1.0	0.0	1.0	1.0	1.0	0.887308533916849	0.11269146608315095	0.9754901960784313	0.9055745164960182	0.9392330383480826	0.9500198333994446	0.049980166600555376	0.6248919619706137	0.9117276166456494	0.7415384615384616
347	1.0	0.0	1.0	1.0	1.0	0.887308533916849	0.11269146608315095	0.9754901960784313	0.9055745164960182	0.9392330383480826	0.9500198333994446	0.049980166600555376	0.6248919619706137	0.9117276166456494	0.7415384615384616
347	1.0	0.0	1.0	1.0	1.0	0.887308533916849	0.11269146608315095	0.9754901960784313	0.9055745164960182	0.9392330383480826	0.9500198333994446	0.049980166600555376	0.6248919619706137	0.9117276166456494	0.7415384615384616
347	1.0	0.0	1.0	1.0	1.0	0.887308533916849	0.11269146608315095	0.9754901960784313	0.9055745164960182	0.9392330383480826	0.9500198333994446	0.049980166600555376	0.6248919619706137	0.9117276166456494	0.7415384615384616
347	1.0	0.0	1.0	1.0	1.0	0.887308533916849	0.11269146608315095	0.9754901960784313	0.9055745164960182	0.9392330383480826	0.9500198333994446	0.049980166600555376	0.6248919619706137	0.9117276166456494	0.7415384615384616
347	1.0	0.0	1.0	1.0	1.0	0.887308533916849	0.11269146608315095	0.9754901960784313	0.9055745164960182	0.9392330383480826	0.9500198333994446	0.049980166600555376	0.6248919619706137	0.9117276166456494	0.7415384615384616
347	1.0	0.0	1.0	1.0	1.0	0.887308533916849	0.11269146608315095	0.9754901960784313	0.9055745164960182	0.9392330383480826	0.9500198333994446	0.049980166600555376	0.6248919619706137	0.9117276166456494	0.7415384615384616
347	1.0	0.0	1.0	1.0	1.0	0.887308533916849	0.11269146608315095	0.9754901960784313	0.9055745164960182	0.9392330383480826	0.9500198333994446	0.049980166600555376	0.6248919619706137	0.9117276166456494	0.7415384615384616
347	1.0	0.0	1.0	1.0	1.0	0.887308533916849	0.11269146608315095	0.9754901960784313	0.9055745164960182	0.9392330383480826	0.9500198333994446	0.049980166600555376	0.6248919619706137	0.9117276166456494	0.7415384615384616
347	1.0	0.0	1.0	1.0	1.0	0.887308533916849	0.11269146608315095	0.9754901960784313	0.9055745164960182	0.9392330383480826	0.9500198333994446	0.049980166600555376	0.6248919619706137	0.9117276166456494	0.7415384615384616
347	1.0	0.0	1.0	1.0	1.0	0.887308533916849	0.11269146608315095	0.9754901960784313	0.9055745164960182	0.9392330383480826	0.9500198333994446	0.049980166600555376	0.6248919619706137	0.9117276166456494	0.7415384615384616
347	1.0	0.0	1.0	1.0	1.0	0.887308533916849	0.11269146608315095	0.9754901960784313	0.9055745164960182	0.9392330383480826	0.9500198333994446	0.049980166600555376	0.6248919619706137	0.9117276166456494	0.7415384615384616
347	1.0	0.0	1.0	1.0	1.0	0.887308533916849	0.11269146608315095	0.9754901960784313	0.9055745164960182	0.9392330383480826	0.9500198333994446	0.049980166600555376	0.6248919619706137	0.9117276166456494	0.7415384615384616
347	1.0	0.0	1.0	1.0	1.0	0.887308533916849	0.11269146608315095	0.9754901960784313	0.9055745164960182	0.9392330383480826	0.9500198333994446	0.049980166600555376	0.6248919619706137	0.9117276166456494	0.7415384615384616
347	1.0	0.0	1.0	1.0	1.0	0.887308533916849	0.11269146608315095	0.9754901960784313	0.9055745164960182	0.9392330383480826	0.9500198333994446	0.049980166600555376	0.6248919619706137	0.9117276166456494	0.7415384615384616
347	1.0	0.0	1.0	1.0	1.0	0.887308533916849	0.11269146608315095	0.9754901960784313	0.9055745164960182	0.9392330383480826	0.9500198333994446	0.049980166600555376	0.6248919619706137	0.9117276166456494	0.7415384615384616
347	1.0	0.0	1.0	1.0	1.0	0.887308533916849	0.11269146608315095	0.9754901960784313	0.9055745164960182	0.9392330383480826	0.9500198333994446	0.049980166600555376	0.6248919619706137	0.9117276166456494	0.7415384615384616
347	1.0	0.0	1.0	1.0	1.0	0.887308533916849	0.11269146608315095	0.9754901960784313	0.9055745164960182	0.9392330383480826	0.9500198333994446	0.049980166600555376	0.6248919619706137	0.9117276166456494	0.7415384615384616
347	1.0	0.0	1.0	1.0	1.0	0.887308533916849	0.11269146608315095	0.9754901960784313	0.9055745164960182	0.9392330383480826	0.9500198333994446	0.049980166600555376	0.6248919619706137	0.9117276166456494	0.7415384615384616
347	1.0	0.0	1.0	1.0	1.0	0.887308533916849	0.11269146608315095	0.9754901960784313	0.9055745164960182	0.9392330383480826	0.9500198333994446	0.049980166600555376	0.6248919619706137	0.9117276166456494	0.7415384615384616
347	1.0	0.0	1.0	1.0	1.0	0.887308533916849	0.11269146608315095	0.9754901960784313	0.9055745164960182	0.9392330383480826	0.9500198333994446	0.049980166600555376	0.6248919619706137	0.9117276166456494	0.7415384615384616
347	1.0	0.0	1.0	1.0	1.0	0.887308533916849	0.11269146608315095	0.9754901960784313	0.9055745164960182	0.9392330383480826	0.9500198333994446	0.049980166600555376	0.6248919619706137	0.9117276166456494	0.7415384615384616
347	1.0	0.0	1.0	1.0	1.0	0.887308533916849	0.11269146608315095	0.9754901960784313	0.9055745164960182	0.9392330383480826	0.9500198333994446	0.049980166600555376	0.6248919619706137	0.9117276166456494	0.7415384615384616
347	1.0	0.0	1.0	1.0	1.0	0.887308533916849	0.11269146608315095	0.9754901960784313	0.9055745164960182	0.9392330383480826	0.9500198333994446	0.049980166600555376	0.6248919619706137	0.9117276166456494	0.7415384615384616
347	1.0	0.0	1.0	1.0	1.0	0.887308533916849	0.11269146608315095	0.9754901960784313	0.9055745164960182	0.9392330383480826	0.9500198333994446	0.049980166600555376	0.6248919619706137	0.9117276166456494	0.7415384615384616
347	1.0	0.0	1.0	1.0	1.0	0.887308533916849	0.11269146608315095	0.9754901960784313	0.9055745164960182	0.9392330383480826	0.9500198333994446	0.049980166600555376	0.6248919619706137	0.9117276166456494	0.7415384615384616
347	1.0	0.0	1.0	1.0	1.0	0.887308533916849	0.11269146608315095	0.9754901960784313	0.9055745164960182	0.9392330383480826	0.9500198333994446	0.049980166600555376	0.6248919619706137	0.9117276166456494	0.7415384615384616
347	1.0	0.0	1.0	1.0	1.0	0.887308533916849	0.11269146608315095	0.9754901960784313	0.9055745164960182	0.9392330383480826	0.9500198333994446	0.049980166600555376	0.6248919619706137	0.9117276166456494	0.7415384615384616
347	1.0	0.0	1.0	1.0	1.0	0.887308533916849	0.11269146608315095	0.9754901960784313	0.9055745164960182	0.9392330383480826	0.9500198333994446	0.049980166600555376	0.6248919619706137	0.9117276166456494	0.7415384615384616
347	1.0	0.0	1.0	1.0	1.0	0.887308533916849	0.11269146608315095	0.9754901960784313	0.9055745164960182	0.9392330383480826	0.9500198333994446	0.049980166600555376	0.6248919619706137	0.9117276166456494	0.7415384615384616
347	1.0	0.0	1.0	1.0	1.0	0.887308533916849	0.11269146608315095	0.9754901960784313	0.9055745164960182	0.9392330383480826	0.9500198333994446	0.049980166600555376	0.6248919619706137	0.9117276166456494	0.7415384615384616
347	1.0	0.0	1.0	1.0	1.0	0.887308533916849	0.11269146608315095	0.9754901960784313	0.9055745164960182	0.9392330383480826	0.9500198333994446	0.049980166600555376	0.6248919619706137	0.9117276166456494	0.7415384615384616
347	1.0	0.0	1.0	1.0	1.0	0.887308533916849	0.11269146608315095	0.9754901960784313	0.9055745164960182	0.9392330383480826	0.9500198333994446	0.049980166600555376	0.6248919619706137	0.9117276166456494	0.7415384615384616
347	1.0	0.0	1.0	1.0	1.0	0.887308533916849	0.11269146608315095	0.9754901960784313	0.9055745164960182	0.9392330383480826	0.9500198333994446	0.049980166600555376	0.6248919619706137	0.9117276166456494	0.7415384615384616
347	1.0	0.0	1.0	1.0	1.0	0.887308533916849	0.11269146608315095	0.9754901960784313	0.9055745164960182	0.9392330383480826	0.9500198333994446	0.049980166600555376	0.6248919619706137	0.9117276166456494	0.7415384615384616
347	1.0	0.0	1.0	1.0	1.0	0.887308533916849	0.11269146608315095	0.9754901960784313	0.9055745164960182	0.9392330383480826	0.9500198333994446	0.049980166600555376	0.6248919619706137	0.9117276166456494	0.7415384615384616
347	1.0	0.0	1.0	1.0	1.0	0.887308533916849	0.11269146608315095	0.9754901960784313	0.9055745164960182	0.9392330383480826	0.9500198333994446	0.049980166600555376	0.6248919619706137	0.9117276166456494	0.7415384615384616
347	1.0	0.0	1.0	1.0	1.0	0.887308533916849	0.11269146608315095	0.9754901960784313	0.9055745164960182	0.9392330383480826	0.9500198333994446	0.049980166600555376	0.6248919619706137	0.9117276166456494	0.7415384615384616
347	1.0	0.0	1.0	1.0	1.0	0.887308533916849	0.11269146608315095	0.9754901960784313	0.9055745164960182	0.9392330383480826	0.9500198333994446	0.049980166600555376	0.6248919619706137	0.9117276166456494	0.7415384615384616
347	1.0	0.0	1.0	1.0	1.0	0.887308533916849	0.11269146608315095	0.9754901960784313	0.9055745164960182	0.9392330383480826	0.9500198333994446	0.049980166600555376	0.6248919619706137	0.9117276166456494	0.7415384615384616
347	1.0	0.0	1.0	1.0	1.0	0.887308533916849	0.11269146608315095	0.9754901960784313	0.9055745164960182	0.9392330383480826	0.9500198333994446	0.049980166600555376	0.6248919619706137	0.9117276166456494	0.7415384615384616
347	1.0	0.0	1.0	1.0	1.0	0.887308533916849	0.11269146608315095	0.9754901960784313	0.9055745164960182	0.9392330383480826	0.9500198333994446	0.049980166600555376	0.6248919619706137	0.9117276166456494	0.7415384615384616
347	1.0	0.0	1.0	1.0	1.0	0.887308533916849	0.11269146608315095	0.9754901960784313	0.9055745164960182	0.9392330383480826	0.9500198333994446	0.049980166600555376	0.6248919619706137	0.9117276166456494	0.7415384615384616
347	1.0	0.0	1.0	1.0	1.0	0.887308533916849	0.11269146608315095	0.9754901960784313	0.9055745164960182	0.9392330383480826	0.9500198333994446	0.049980166600555376	0.6248919619706137	0.9117276166456494	0.7415384615384616
