# Supplementary material for: An Improved Hybrid Feature Selection Algorithm for Electric Charge Recovery Risk
Source: Hindawi journal article supplement (doi:10.1155/2020/8479341), 2020-08-28
Supplement: f1 [file 8479341.f1.zip › 8479341.f1/Experimental Results/201808/BPSO_SBS_results.csv]

features_num	Accuracy_high	Loss_high	Precission_high	Recall_high	F1_high	Accuracy_med	Loss_med	Precission_med	Recall_med	F1_med	Accuracy_low	Loss_low	Precission_low	Recall_low	F1_low
347	1	0	1	1	1	0.883899233	0.116100767	0.975399754	0.902161547	0.937352246	0.950024789	0.049975211	0.625108225	0.910466583	0.741273101
346	1	0	1	1	1	0.891447368	0.108552632	0.975520196	0.909817352	0.941523922	0.9499157	0.0500843	0.624352332	0.911727617	0.74115838
346	1	0	1	1	1	0.891447368	0.108552632	0.975520196	0.909817352	0.941523922	0.9499157	0.0500843	0.624352332	0.911727617	0.74115838
346	1	0	1	1	1	0.891447368	0.108552632	0.975520196	0.909817352	0.941523922	0.9499157	0.0500843	0.624352332	0.911727617	0.74115838
346	1	0	1	1	1	0.891447368	0.108552632	0.975520196	0.909817352	0.941523922	0.9499157	0.0500843	0.624352332	0.911727617	0.74115838
346	1	0	1	1	1	0.891447368	0.108552632	0.975520196	0.909817352	0.941523922	0.9499157	0.0500843	0.624352332	0.911727617	0.74115838
346	1	0	1	1	1	0.891447368	0.108552632	0.975520196	0.909817352	0.941523922	0.9499157	0.0500843	0.624352332	0.911727617	0.74115838
346	1	0	1	1	1	0.891447368	0.108552632	0.975520196	0.909817352	0.941523922	0.9499157	0.0500843	0.624352332	0.911727617	0.74115838
346	1	0	1	1	1	0.891447368	0.108552632	0.975520196	0.909817352	0.941523922	0.9499157	0.0500843	0.624352332	0.911727617	0.74115838
346	1	0	1	1	1	0.891447368	0.108552632	0.975520196	0.909817352	0.941523922	0.9499157	0.0500843	0.624352332	0.911727617	0.74115838
346	1	0	1	1	1	0.891447368	0.108552632	0.975520196	0.909817352	0.941523922	0.9499157	0.0500843	0.624352332	0.911727617	0.74115838
346	1	0	1	1	1	0.891447368	0.108552632	0.975520196	0.909817352	0.941523922	0.9499157	0.0500843	0.624352332	0.911727617	0.74115838
346	1	0	1	1	1	0.891447368	0.108552632	0.975520196	0.909817352	0.941523922	0.9499157	0.0500843	0.624352332	0.911727617	0.74115838
346	1	0	1	1	1	0.891447368	0.108552632	0.975520196	0.909817352	0.941523922	0.9499157	0.0500843	0.624352332	0.911727617	0.74115838
346	1	0	1	1	1	0.891447368	0.108552632	0.975520196	0.909817352	0.941523922	0.9499157	0.0500843	0.624352332	0.911727617	0.74115838
346	1	0	1	1	1	0.891447368	0.108552632	0.975520196	0.909817352	0.941523922	0.9499157	0.0500843	0.624352332	0.911727617	0.74115838
346	1	0	1	1	1	0.891447368	0.108552632	0.975520196	0.909817352	0.941523922	0.9499157	0.0500843	0.624352332	0.911727617	0.74115838
346	1	0	1	1	1	0.891447368	0.108552632	0.975520196	0.909817352	0.941523922	0.9499157	0.0500843	0.624352332	0.911727617	0.74115838
346	1	0	1	1	1	0.891447368	0.108552632	0.975520196	0.909817352	0.941523922	0.9499157	0.0500843	0.624352332	0.911727617	0.74115838
346	1	0	1	1	1	0.891447368	0.108552632	0.975520196	0.909817352	0.941523922	0.9499157	0.0500843	0.624352332	0.911727617	0.74115838
346	1	0	1	1	1	0.891447368	0.108552632	0.975520196	0.909817352	0.941523922	0.9499157	0.0500843	0.624352332	0.911727617	0.74115838
346	1	0	1	1	1	0.891447368	0.108552632	0.975520196	0.909817352	0.941523922	0.9499157	0.0500843	0.624352332	0.911727617	0.74115838
346	1	0	1	1	1	0.891447368	0.108552632	0.975520196	0.909817352	0.941523922	0.9499157	0.0500843	0.624352332	0.911727617	0.74115838
346	1	0	1	1	1	0.891447368	0.108552632	0.975520196	0.909817352	0.941523922	0.9499157	0.0500843	0.624352332	0.911727617	0.74115838
346	1	0	1	1	1	0.891447368	0.108552632	0.975520196	0.909817352	0.941523922	0.9499157	0.0500843	0.624352332	0.911727617	0.74115838
346	1	0	1	1	1	0.891447368	0.108552632	0.975520196	0.909817352	0.941523922	0.9499157	0.0500843	0.624352332	0.911727617	0.74115838
346	1	0	1	1	1	0.891447368	0.108552632	0.975520196	0.909817352	0.941523922	0.9499157	0.0500843	0.624352332	0.911727617	0.74115838
346	1	0	1	1	1	0.891447368	0.108552632	0.975520196	0.909817352	0.941523922	0.9499157	0.0500843	0.624352332	0.911727617	0.74115838
346	1	0	1	1	1	0.891447368	0.108552632	0.975520196	0.909817352	0.941523922	0.9499157	0.0500843	0.624352332	0.911727617	0.74115838
346	1	0	1	1	1	0.891447368	0.108552632	0.975520196	0.909817352	0.941523922	0.9499157	0.0500843	0.624352332	0.911727617	0.74115838
346	1	0	1	1	1	0.891447368	0.108552632	0.975520196	0.909817352	0.941523922	0.9499157	0.0500843	0.624352332	0.911727617	0.74115838
346	1	0	1	1	1	0.891447368	0.108552632	0.975520196	0.909817352	0.941523922	0.9499157	0.0500843	0.624352332	0.911727617	0.74115838
346	1	0	1	1	1	0.891447368	0.108552632	0.975520196	0.909817352	0.941523922	0.9499157	0.0500843	0.624352332	0.911727617	0.74115838
346	1	0	1	1	1	0.891447368	0.108552632	0.975520196	0.909817352	0.941523922	0.9499157	0.0500843	0.624352332	0.911727617	0.74115838
346	1	0	1	1	1	0.891447368	0.108552632	0.975520196	0.909817352	0.941523922	0.9499157	0.0500843	0.624352332	0.911727617	0.74115838
346	1	0	1	1	1	0.891447368	0.108552632	0.975520196	0.909817352	0.941523922	0.9499157	0.0500843	0.624352332	0.911727617	0.74115838
346	1	0	1	1	1	0.891447368	0.108552632	0.975520196	0.909817352	0.941523922	0.9499157	0.0500843	0.624352332	0.911727617	0.74115838
346	1	0	1	1	1	0.891447368	0.108552632	0.975520196	0.909817352	0.941523922	0.9499157	0.0500843	0.624352332	0.911727617	0.74115838
346	1	0	1	1	1	0.891447368	0.108552632	0.975520196	0.909817352	0.941523922	0.9499157	0.0500843	0.624352332	0.911727617	0.74115838
346	1	0	1	1	1	0.891447368	0.108552632	0.975520196	0.909817352	0.941523922	0.9499157	0.0500843	0.624352332	0.911727617	0.74115838
346	1	0	1	1	1	0.891447368	0.108552632	0.975520196	0.909817352	0.941523922	0.9499157	0.0500843	0.624352332	0.911727617	0.74115838
346	1	0	1	1	1	0.891447368	0.108552632	0.975520196	0.909817352	0.941523922	0.9499157	0.0500843	0.624352332	0.911727617	0.74115838
346	1	0	1	1	1	0.891447368	0.108552632	0.975520196	0.909817352	0.941523922	0.9499157	0.0500843	0.624352332	0.911727617	0.74115838
346	1	0	1	1	1	0.891447368	0.108552632	0.975520196	0.909817352	0.941523922	0.9499157	0.0500843	0.624352332	0.911727617	0.74115838
346	1	0	1	1	1	0.891447368	0.108552632	0.975520196	0.909817352	0.941523922	0.9499157	0.0500843	0.624352332	0.911727617	0.74115838
346	1	0	1	1	1	0.891447368	0.108552632	0.975520196	0.909817352	0.941523922	0.9499157	0.0500843	0.624352332	0.911727617	0.74115838
346	1	0	1	1	1	0.891447368	0.108552632	0.975520196	0.909817352	0.941523922	0.9499157	0.0500843	0.624352332	0.911727617	0.74115838
346	1	0	1	1	1	0.891447368	0.108552632	0.975520196	0.909817352	0.941523922	0.9499157	0.0500843	0.624352332	0.911727617	0.74115838
346	1	0	1	1	1	0.891447368	0.108552632	0.975520196	0.909817352	0.941523922	0.9499157	0.0500843	0.624352332	0.911727617	0.74115838
346	1	0	1	1	1	0.891447368	0.108552632	0.975520196	0.909817352	0.941523922	0.9499157	0.0500843	0.624352332	0.911727617	0.74115838
346	1	0	1	1	1	0.891447368	0.108552632	0.975520196	0.909817352	0.941523922	0.9499157	0.0500843	0.624352332	0.911727617	0.74115838
346	1	0	1	1	1	0.891447368	0.108552632	0.975520196	0.909817352	0.941523922	0.9499157	0.0500843	0.624352332	0.911727617	0.74115838
346	1	0	1	1	1	0.891447368	0.108552632	0.975520196	0.909817352	0.941523922	0.9499157	0.0500843	0.624352332	0.911727617	0.74115838
346	1	0	1	1	1	0.891447368	0.108552632	0.975520196	0.909817352	0.941523922	0.9499157	0.0500843	0.624352332	0.911727617	0.74115838
346	1	0	1	1	1	0.891447368	0.108552632	0.975520196	0.909817352	0.941523922	0.9499157	0.0500843	0.624352332	0.911727617	0.74115838
346	1	0	1	1	1	0.891447368	0.108552632	0.975520196	0.909817352	0.941523922	0.9499157	0.0500843	0.624352332	0.911727617	0.74115838
346	1	0	1	1	1	0.891447368	0.108552632	0.975520196	0.909817352	0.941523922	0.9499157	0.0500843	0.624352332	0.911727617	0.74115838
346	1	0	1	1	1	0.891447368	0.108552632	0.975520196	0.909817352	0.941523922	0.9499157	0.0500843	0.624352332	0.911727617	0.74115838
346	1	0	1	1	1	0.891447368	0.108552632	0.975520196	0.909817352	0.941523922	0.9499157	0.0500843	0.624352332	0.911727617	0.74115838
346	1	0	1	1	1	0.891447368	0.108552632	0.975520196	0.909817352	0.941523922	0.9499157	0.0500843	0.624352332	0.911727617	0.74115838
346	1	0	1	1	1	0.891447368	0.108552632	0.975520196	0.909817352	0.941523922	0.9499157	0.0500843	0.624352332	0.911727617	0.74115838
345	1	0	1	1	1	0.889010989	0.110989011	0.974233129	0.908466819	0.940201303	0.950208292	0.049791708	0.625	0.91540404	0.742827869
345	1	0	1	1	1	0.889010989	0.110989011	0.974233129	0.908466819	0.940201303	0.950208292	0.049791708	0.625	0.91540404	0.742827869
345	1	0	1	1	1	0.889010989	0.110989011	0.974233129	0.908466819	0.940201303	0.950208292	0.049791708	0.625	0.91540404	0.742827869
345	1	0	1	1	1	0.889010989	0.110989011	0.974233129	0.908466819	0.940201303	0.950208292	0.049791708	0.625	0.91540404	0.742827869
345	1	0	1	1	1	0.889010989	0.110989011	0.974233129	0.908466819	0.940201303	0.950208292	0.049791708	0.625	0.91540404	0.742827869
345	1	0	1	1	1	0.889010989	0.110989011	0.974233129	0.908466819	0.940201303	0.950208292	0.049791708	0.625	0.91540404	0.742827869
345	1	0	1	1	1	0.889010989	0.110989011	0.974233129	0.908466819	0.940201303	0.950208292	0.049791708	0.625	0.91540404	0.742827869
345	1	0	1	1	1	0.889010989	0.110989011	0.974233129	0.908466819	0.940201303	0.950208292	0.049791708	0.625	0.91540404	0.742827869
345	1	0	1	1	1	0.889010989	0.110989011	0.974233129	0.908466819	0.940201303	0.950208292	0.049791708	0.625	0.91540404	0.742827869
345	1	0	1	1	1	0.889010989	0.110989011	0.974233129	0.908466819	0.940201303	0.950208292	0.049791708	0.625	0.91540404	0.742827869
345	1	0	1	1	1	0.889010989	0.110989011	0.974233129	0.908466819	0.940201303	0.950208292	0.049791708	0.625	0.91540404	0.742827869
345	1	0	1	1	1	0.889010989	0.110989011	0.974233129	0.908466819	0.940201303	0.950208292	0.049791708	0.625	0.91540404	0.742827869
345	1	0	1	1	1	0.889010989	0.110989011	0.974233129	0.908466819	0.940201303	0.950208292	0.049791708	0.625	0.91540404	0.742827869
345	1	0	1	1	1	0.889010989	0.110989011	0.974233129	0.908466819	0.940201303	0.950208292	0.049791708	0.625	0.91540404	0.742827869
345	1	0	1	1	1	0.889010989	0.110989011	0.974233129	0.908466819	0.940201303	0.950208292	0.049791708	0.625	0.91540404	0.742827869
345	1	0	1	1	1	0.889010989	0.110989011	0.974233129	0.908466819	0.940201303	0.950208292	0.049791708	0.625	0.91540404	0.742827869
345	1	0	1	1	1	0.889010989	0.110989011	0.974233129	0.908466819	0.940201303	0.950208292	0.049791708	0.625	0.91540404	0.742827869
345	1	0	1	1	1	0.889010989	0.110989011	0.974233129	0.908466819	0.940201303	0.950208292	0.049791708	0.625	0.91540404	0.742827869
345	1	0	1	1	1	0.889010989	0.110989011	0.974233129	0.908466819	0.940201303	0.950208292	0.049791708	0.625	0.91540404	0.742827869
345	1	0	1	1	1	0.889010989	0.110989011	0.974233129	0.908466819	0.940201303	0.950208292	0.049791708	0.625	0.91540404	0.742827869
345	1	0	1	1	1	0.889010989	0.110989011	0.974233129	0.908466819	0.940201303	0.950208292	0.049791708	0.625	0.91540404	0.742827869
345	1	0	1	1	1	0.889010989	0.110989011	0.974233129	0.908466819	0.940201303	0.950208292	0.049791708	0.625	0.91540404	0.742827869
345	1	0	1	1	1	0.889010989	0.110989011	0.974233129	0.908466819	0.940201303	0.950208292	0.049791708	0.625	0.91540404	0.742827869
345	1	0	1	1	1	0.889010989	0.110989011	0.974233129	0.908466819	0.940201303	0.950208292	0.049791708	0.625	0.91540404	0.742827869
345	1	0	1	1	1	0.889010989	0.110989011	0.974233129	0.908466819	0.940201303	0.950208292	0.049791708	0.625	0.91540404	0.742827869
345	1	0	1	1	1	0.889010989	0.110989011	0.974233129	0.908466819	0.940201303	0.950208292	0.049791708	0.625	0.91540404	0.742827869
345	1	0	1	1	1	0.889010989	0.110989011	0.974233129	0.908466819	0.940201303	0.950208292	0.049791708	0.625	0.91540404	0.742827869
345	1	0	1	1	1	0.889010989	0.110989011	0.974233129	0.908466819	0.940201303	0.950208292	0.049791708	0.625	0.91540404	0.742827869
345	1	0	1	1	1	0.889010989	0.110989011	0.974233129	0.908466819	0.940201303	0.950208292	0.049791708	0.625	0.91540404	0.742827869
345	1	0	1	1	1	0.889010989	0.110989011	0.974233129	0.908466819	0.940201303	0.950208292	0.049791708	0.625	0.91540404	0.742827869
345	1	0	1	1	1	0.889010989	0.110989011	0.974233129	0.908466819	0.940201303	0.950208292	0.049791708	0.625	0.91540404	0.742827869
345	1	0	1	1	1	0.889010989	0.110989011	0.974233129	0.908466819	0.940201303	0.950208292	0.049791708	0.625	0.91540404	0.742827869
345	1	0	1	1	1	0.889010989	0.110989011	0.974233129	0.908466819	0.940201303	0.950208292	0.049791708	0.625	0.91540404	0.742827869
345	1	0	1	1	1	0.889010989	0.110989011	0.974233129	0.908466819	0.940201303	0.950208292	0.049791708	0.625	0.91540404	0.742827869
345	1	0	1	1	1	0.889010989	0.110989011	0.974233129	0.908466819	0.940201303	0.950208292	0.049791708	0.625	0.91540404	0.742827869
345	1	0	1	1	1	0.889010989	0.110989011	0.974233129	0.908466819	0.940201303	0.950208292	0.049791708	0.625	0.91540404	0.742827869
345	1	0	1	1	1	0.889010989	0.110989011	0.974233129	0.908466819	0.940201303	0.950208292	0.049791708	0.625	0.91540404	0.742827869
345	1	0	1	1	1	0.889010989	0.110989011	0.974233129	0.908466819	0.940201303	0.950208292	0.049791708	0.625	0.91540404	0.742827869
345	1	0	1	1	1	0.889010989	0.110989011	0.974233129	0.908466819	0.940201303	0.950208292	0.049791708	0.625	0.91540404	0.742827869
345	1	0	1	1	1	0.889010989	0.110989011	0.974233129	0.908466819	0.940201303	0.950208292	0.049791708	0.625	0.91540404	0.742827869
345	1	0	1	1	1	0.889010989	0.110989011	0.974233129	0.908466819	0.940201303	0.950208292	0.049791708	0.625	0.91540404	0.742827869
345	1	0	1	1	1	0.889010989	0.110989011	0.974233129	0.908466819	0.940201303	0.950208292	0.049791708	0.625	0.91540404	0.742827869
345	1	0	1	1	1	0.889010989	0.110989011	0.974233129	0.908466819	0.940201303	0.950208292	0.049791708	0.625	0.91540404	0.742827869
345	1	0	1	1	1	0.889010989	0.110989011	0.974233129	0.908466819	0.940201303	0.950208292	0.049791708	0.625	0.91540404	0.742827869
345	1	0	1	1	1	0.889010989	0.110989011	0.974233129	0.908466819	0.940201303	0.950208292	0.049791708	0.625	0.91540404	0.742827869
345	1	0	1	1	1	0.889010989	0.110989011	0.974233129	0.908466819	0.940201303	0.950208292	0.049791708	0.625	0.91540404	0.742827869
345	1	0	1	1	1	0.889010989	0.110989011	0.974233129	0.908466819	0.940201303	0.950208292	0.049791708	0.625	0.91540404	0.742827869
345	1	0	1	1	1	0.889010989	0.110989011	0.974233129	0.908466819	0.940201303	0.950208292	0.049791708	0.625	0.91540404	0.742827869
345	1	0	1	1	1	0.889010989	0.110989011	0.974233129	0.908466819	0.940201303	0.950208292	0.049791708	0.625	0.91540404	0.742827869
345	1	0	1	1	1	0.889010989	0.110989011	0.974233129	0.908466819	0.940201303	0.950208292	0.049791708	0.625	0.91540404	0.742827869
345	1	0	1	1	1	0.889010989	0.110989011	0.974233129	0.908466819	0.940201303	0.950208292	0.049791708	0.625	0.91540404	0.742827869
345	1	0	1	1	1	0.889010989	0.110989011	0.974233129	0.908466819	0.940201303	0.950208292	0.049791708	0.625	0.91540404	0.742827869
345	1	0	1	1	1	0.889010989	0.110989011	0.974233129	0.908466819	0.940201303	0.950208292	0.049791708	0.625	0.91540404	0.742827869
345	1	0	1	1	1	0.889010989	0.110989011	0.974233129	0.908466819	0.940201303	0.950208292	0.049791708	0.625	0.91540404	0.742827869
345	1	0	1	1	1	0.889010989	0.110989011	0.974233129	0.908466819	0.940201303	0.950208292	0.049791708	0.625	0.91540404	0.742827869
345	1	0	1	1	1	0.889010989	0.110989011	0.974233129	0.908466819	0.940201303	0.950208292	0.049791708	0.625	0.91540404	0.742827869
345	1	0	1	1	1	0.889010989	0.110989011	0.974233129	0.908466819	0.940201303	0.950208292	0.049791708	0.625	0.91540404	0.742827869
345	1	0	1	1	1	0.889010989	0.110989011	0.974233129	0.908466819	0.940201303	0.950208292	0.049791708	0.625	0.91540404	0.742827869
345	1	0	1	1	1	0.889010989	0.110989011	0.974233129	0.908466819	0.940201303	0.950208292	0.049791708	0.625	0.91540404	0.742827869
345	1	0	1	1	1	0.889010989	0.110989011	0.974233129	0.908466819	0.940201303	0.950208292	0.049791708	0.625	0.91540404	0.742827869
345	1	0	1	1	1	0.889010989	0.110989011	0.974233129	0.908466819	0.940201303	0.950208292	0.049791708	0.625	0.91540404	0.742827869
345	1	0	1	1	1	0.889010989	0.110989011	0.974233129	0.908466819	0.940201303	0.950208292	0.049791708	0.625	0.91540404	0.742827869
345	1	0	1	1	1	0.889010989	0.110989011	0.974233129	0.908466819	0.940201303	0.950208292	0.049791708	0.625	0.91540404	0.742827869
345	1	0	1	1	1	0.889010989	0.110989011	0.974233129	0.908466819	0.940201303	0.950208292	0.049791708	0.625	0.91540404	0.742827869
345	1	0	1	1	1	0.889010989	0.110989011	0.974233129	0.908466819	0.940201303	0.950208292	0.049791708	0.625	0.91540404	0.742827869
345	1	0	1	1	1	0.889010989	0.110989011	0.974233129	0.908466819	0.940201303	0.950208292	0.049791708	0.625	0.91540404	0.742827869
345	1	0	1	1	1	0.889010989	0.110989011	0.974233129	0.908466819	0.940201303	0.950208292	0.049791708	0.625	0.91540404	0.742827869
345	1	0	1	1	1	0.889010989	0.110989011	0.974233129	0.908466819	0.940201303	0.950208292	0.049791708	0.625	0.91540404	0.742827869
345	1	0	1	1	1	0.889010989	0.110989011	0.974233129	0.908466819	0.940201303	0.950208292	0.049791708	0.625	0.91540404	0.742827869
345	1	0	1	1	1	0.889010989	0.110989011	0.974233129	0.908466819	0.940201303	0.950208292	0.049791708	0.625	0.91540404	0.742827869
345	1	0	1	1	1	0.889010989	0.110989011	0.974233129	0.908466819	0.940201303	0.950208292	0.049791708	0.625	0.91540404	0.742827869
345	1	0	1	1	1	0.889010989	0.110989011	0.974233129	0.908466819	0.940201303	0.950208292	0.049791708	0.625	0.91540404	0.742827869
345	1	0	1	1	1	0.889010989	0.110989011	0.974233129	0.908466819	0.940201303	0.950208292	0.049791708	0.625	0.91540404	0.742827869
345	1	0	1	1	1	0.889010989	0.110989011	0.974233129	0.908466819	0.940201303	0.950208292	0.049791708	0.625	0.91540404	0.742827869
345	1	0	1	1	1	0.889010989	0.110989011	0.974233129	0.908466819	0.940201303	0.950208292	0.049791708	0.625	0.91540404	0.742827869
345	1	0	1	1	1	0.889010989	0.110989011	0.974233129	0.908466819	0.940201303	0.950208292	0.049791708	0.625	0.91540404	0.742827869
345	1	0	1	1	1	0.889010989	0.110989011	0.974233129	0.908466819	0.940201303	0.950208292	0.049791708	0.625	0.91540404	0.742827869
345	1	0	1	1	1	0.889010989	0.110989011	0.974233129	0.908466819	0.940201303	0.950208292	0.049791708	0.625	0.91540404	0.742827869
345	1	0	1	1	1	0.889010989	0.110989011	0.974233129	0.908466819	0.940201303	0.950208292	0.049791708	0.625	0.91540404	0.742827869
345	1	0	1	1	1	0.889010989	0.110989011	0.974233129	0.908466819	0.940201303	0.950208292	0.049791708	0.625	0.91540404	0.742827869
345	1	0	1	1	1	0.889010989	0.110989011	0.974233129	0.908466819	0.940201303	0.950208292	0.049791708	0.625	0.91540404	0.742827869
345	1	0	1	1	1	0.889010989	0.110989011	0.974233129	0.908466819	0.940201303	0.950208292	0.049791708	0.625	0.91540404	0.742827869
345	1	0	1	1	1	0.889010989	0.110989011	0.974233129	0.908466819	0.940201303	0.950208292	0.049791708	0.625	0.91540404	0.742827869
345	1	0	1	1	1	0.889010989	0.110989011	0.974233129	0.908466819	0.940201303	0.950208292	0.049791708	0.625	0.91540404	0.742827869
345	1	0	1	1	1	0.889010989	0.110989011	0.974233129	0.908466819	0.940201303	0.950208292	0.049791708	0.625	0.91540404	0.742827869
345	1	0	1	1	1	0.889010989	0.110989011	0.974233129	0.908466819	0.940201303	0.950208292	0.049791708	0.625	0.91540404	0.742827869
345	1	0	1	1	1	0.889010989	0.110989011	0.974233129	0.908466819	0.940201303	0.950208292	0.049791708	0.625	0.91540404	0.742827869
345	1	0	1	1	1	0.889010989	0.110989011	0.974233129	0.908466819	0.940201303	0.950208292	0.049791708	0.625	0.91540404	0.742827869
345	1	0	1	1	1	0.889010989	0.110989011	0.974233129	0.908466819	0.940201303	0.950208292	0.049791708	0.625	0.91540404	0.742827869
345	1	0	1	1	1	0.889010989	0.110989011	0.974233129	0.908466819	0.940201303	0.950208292	0.049791708	0.625	0.91540404	0.742827869
345	1	0	1	1	1	0.889010989	0.110989011	0.974233129	0.908466819	0.940201303	0.950208292	0.049791708	0.625	0.91540404	0.742827869
345	1	0	1	1	1	0.889010989	0.110989011	0.974233129	0.908466819	0.940201303	0.950208292	0.049791708	0.625	0.91540404	0.742827869
345	1	0	1	1	1	0.889010989	0.110989011	0.974233129	0.908466819	0.940201303	0.950208292	0.049791708	0.625	0.91540404	0.742827869
345	1	0	1	1	1	0.889010989	0.110989011	0.974233129	0.908466819	0.940201303	0.950208292	0.049791708	0.625	0.91540404	0.742827869
345	1	0	1	1	1	0.889010989	0.110989011	0.974233129	0.908466819	0.940201303	0.950208292	0.049791708	0.625	0.91540404	0.742827869
345	1	0	1	1	1	0.889010989	0.110989011	0.974233129	0.908466819	0.940201303	0.950208292	0.049791708	0.625	0.91540404	0.742827869
345	1	0	1	1	1	0.889010989	0.110989011	0.974233129	0.908466819	0.940201303	0.950208292	0.049791708	0.625	0.91540404	0.742827869
345	1	0	1	1	1	0.889010989	0.110989011	0.974233129	0.908466819	0.940201303	0.950208292	0.049791708	0.625	0.91540404	0.742827869
345	1	0	1	1	1	0.889010989	0.110989011	0.974233129	0.908466819	0.940201303	0.950208292	0.049791708	0.625	0.91540404	0.742827869
345	1	0	1	1	1	0.889010989	0.110989011	0.974233129	0.908466819	0.940201303	0.950208292	0.049791708	0.625	0.91540404	0.742827869
345	1	0	1	1	1	0.889010989	0.110989011	0.974233129	0.908466819	0.940201303	0.950208292	0.049791708	0.625	0.91540404	0.742827869
345	1	0	1	1	1	0.889010989	0.110989011	0.974233129	0.908466819	0.940201303	0.950208292	0.049791708	0.625	0.91540404	0.742827869
345	1	0	1	1	1	0.889010989	0.110989011	0.974233129	0.908466819	0.940201303	0.950208292	0.049791708	0.625	0.91540404	0.742827869
345	1	0	1	1	1	0.889010989	0.110989011	0.974233129	0.908466819	0.940201303	0.950208292	0.049791708	0.625	0.91540404	0.742827869
345	1	0	1	1	1	0.889010989	0.110989011	0.974233129	0.908466819	0.940201303	0.950208292	0.049791708	0.625	0.91540404	0.742827869
345	1	0	1	1	1	0.889010989	0.110989011	0.974233129	0.908466819	0.940201303	0.950208292	0.049791708	0.625	0.91540404	0.742827869
345	1	0	1	1	1	0.889010989	0.110989011	0.974233129	0.908466819	0.940201303	0.950208292	0.049791708	0.625	0.91540404	0.742827869
345	1	0	1	1	1	0.889010989	0.110989011	0.974233129	0.908466819	0.940201303	0.950208292	0.049791708	0.625	0.91540404	0.742827869
345	1	0	1	1	1	0.889010989	0.110989011	0.974233129	0.908466819	0.940201303	0.950208292	0.049791708	0.625	0.91540404	0.742827869
345	1	0	1	1	1	0.889010989	0.110989011	0.974233129	0.908466819	0.940201303	0.950208292	0.049791708	0.625	0.91540404	0.742827869
345	1	0	1	1	1	0.889010989	0.110989011	0.974233129	0.908466819	0.940201303	0.950208292	0.049791708	0.625	0.91540404	0.742827869
345	1	0	1	1	1	0.889010989	0.110989011	0.974233129	0.908466819	0.940201303	0.950208292	0.049791708	0.625	0.91540404	0.742827869
345	1	0	1	1	1	0.889010989	0.110989011	0.974233129	0.908466819	0.940201303	0.950208292	0.049791708	0.625	0.91540404	0.742827869
345	1	0	1	1	1	0.889010989	0.110989011	0.974233129	0.908466819	0.940201303	0.950208292	0.049791708	0.625	0.91540404	0.742827869
345	1	0	1	1	1	0.889010989	0.110989011	0.974233129	0.908466819	0.940201303	0.950208292	0.049791708	0.625	0.91540404	0.742827869
345	1	0	1	1	1	0.889010989	0.110989011	0.974233129	0.908466819	0.940201303	0.950208292	0.049791708	0.625	0.91540404	0.742827869
345	1	0	1	1	1	0.889010989	0.110989011	0.974233129	0.908466819	0.940201303	0.950208292	0.049791708	0.625	0.91540404	0.742827869
345	1	0	1	1	1	0.889010989	0.110989011	0.974233129	0.908466819	0.940201303	0.950208292	0.049791708	0.625	0.91540404	0.742827869
345	1	0	1	1	1	0.889010989	0.110989011	0.974233129	0.908466819	0.940201303	0.950208292	0.049791708	0.625	0.91540404	0.742827869
345	1	0	1	1	1	0.889010989	0.110989011	0.974233129	0.908466819	0.940201303	0.950208292	0.049791708	0.625	0.91540404	0.742827869
345	1	0	1	1	1	0.889010989	0.110989011	0.974233129	0.908466819	0.940201303	0.950208292	0.049791708	0.625	0.91540404	0.742827869
345	1	0	1	1	1	0.889010989	0.110989011	0.974233129	0.908466819	0.940201303	0.950208292	0.049791708	0.625	0.91540404	0.742827869
345	1	0	1	1	1	0.889010989	0.110989011	0.974233129	0.908466819	0.940201303	0.950208292	0.049791708	0.625	0.91540404	0.742827869
345	1	0	1	1	1	0.889010989	0.110989011	0.974233129	0.908466819	0.940201303	0.950208292	0.049791708	0.625	0.91540404	0.742827869
345	1	0	1	1	1	0.889010989	0.110989011	0.974233129	0.908466819	0.940201303	0.950208292	0.049791708	0.625	0.91540404	0.742827869
345	1	0	1	1	1	0.889010989	0.110989011	0.974233129	0.908466819	0.940201303	0.950208292	0.049791708	0.625	0.91540404	0.742827869
345	1	0	1	1	1	0.889010989	0.110989011	0.974233129	0.908466819	0.940201303	0.950208292	0.049791708	0.625	0.91540404	0.742827869
345	1	0	1	1	1	0.889010989	0.110989011	0.974233129	0.908466819	0.940201303	0.950208292	0.049791708	0.625	0.91540404	0.742827869
345	1	0	1	1	1	0.889010989	0.110989011	0.974233129	0.908466819	0.940201303	0.950208292	0.049791708	0.625	0.91540404	0.742827869
345	1	0	1	1	1	0.889010989	0.110989011	0.974233129	0.908466819	0.940201303	0.950208292	0.049791708	0.625	0.91540404	0.742827869
345	1	0	1	1	1	0.889010989	0.110989011	0.974233129	0.908466819	0.940201303	0.950208292	0.049791708	0.625	0.91540404	0.742827869
345	1	0	1	1	1	0.889010989	0.110989011	0.974233129	0.908466819	0.940201303	0.950208292	0.049791708	0.625	0.91540404	0.742827869
345	1	0	1	1	1	0.889010989	0.110989011	0.974233129	0.908466819	0.940201303	0.950208292	0.049791708	0.625	0.91540404	0.742827869
345	1	0	1	1	1	0.889010989	0.110989011	0.974233129	0.908466819	0.940201303	0.950208292	0.049791708	0.625	0.91540404	0.742827869
345	1	0	1	1	1	0.889010989	0.110989011	0.974233129	0.908466819	0.940201303	0.950208292	0.049791708	0.625	0.91540404	0.742827869
345	1	0	1	1	1	0.889010989	0.110989011	0.974233129	0.908466819	0.940201303	0.950208292	0.049791708	0.625	0.91540404	0.742827869
345	1	0	1	1	1	0.889010989	0.110989011	0.974233129	0.908466819	0.940201303	0.950208292	0.049791708	0.625	0.91540404	0.742827869
345	1	0	1	1	1	0.889010989	0.110989011	0.974233129	0.908466819	0.940201303	0.950208292	0.049791708	0.625	0.91540404	0.742827869
345	1	0	1	1	1	0.889010989	0.110989011	0.974233129	0.908466819	0.940201303	0.950208292	0.049791708	0.625	0.91540404	0.742827869
345	1	0	1	1	1	0.889010989	0.110989011	0.974233129	0.908466819	0.940201303	0.950208292	0.049791708	0.625	0.91540404	0.742827869
345	1	0	1	1	1	0.889010989	0.110989011	0.974233129	0.908466819	0.940201303	0.950208292	0.049791708	0.625	0.91540404	0.742827869
345	1	0	1	1	1	0.889010989	0.110989011	0.974233129	0.908466819	0.940201303	0.950208292	0.049791708	0.625	0.91540404	0.742827869
345	1	0	1	1	1	0.889010989	0.110989011	0.974233129	0.908466819	0.940201303	0.950208292	0.049791708	0.625	0.91540404	0.742827869
345	1	0	1	1	1	0.889010989	0.110989011	0.974233129	0.908466819	0.940201303	0.950208292	0.049791708	0.625	0.91540404	0.742827869
345	1	0	1	1	1	0.889010989	0.110989011	0.974233129	0.908466819	0.940201303	0.950208292	0.049791708	0.625	0.91540404	0.742827869
345	1	0	1	1	1	0.889010989	0.110989011	0.974233129	0.908466819	0.940201303	0.950208292	0.049791708	0.625	0.91540404	0.742827869
345	1	0	1	1	1	0.889010989	0.110989011	0.974233129	0.908466819	0.940201303	0.950208292	0.049791708	0.625	0.91540404	0.742827869
345	1	0	1	1	1	0.889010989	0.110989011	0.974233129	0.908466819	0.940201303	0.950208292	0.049791708	0.625	0.91540404	0.742827869
345	1	0	1	1	1	0.889010989	0.110989011	0.974233129	0.908466819	0.940201303	0.950208292	0.049791708	0.625	0.91540404	0.742827869
345	1	0	1	1	1	0.889010989	0.110989011	0.974233129	0.908466819	0.940201303	0.950208292	0.049791708	0.625	0.91540404	0.742827869
345	1	0	1	1	1	0.889010989	0.110989011	0.974233129	0.908466819	0.940201303	0.950208292	0.049791708	0.625	0.91540404	0.742827869
345	1	0	1	1	1	0.889010989	0.110989011	0.974233129	0.908466819	0.940201303	0.950208292	0.049791708	0.625	0.91540404	0.742827869
345	1	0	1	1	1	0.889010989	0.110989011	0.974233129	0.908466819	0.940201303	0.950208292	0.049791708	0.625	0.91540404	0.742827869
345	1	0	1	1	1	0.889010989	0.110989011	0.974233129	0.908466819	0.940201303	0.950208292	0.049791708	0.625	0.91540404	0.742827869
345	1	0	1	1	1	0.889010989	0.110989011	0.974233129	0.908466819	0.940201303	0.950208292	0.049791708	0.625	0.91540404	0.742827869
345	1	0	1	1	1	0.889010989	0.110989011	0.974233129	0.908466819	0.940201303	0.950208292	0.049791708	0.625	0.91540404	0.742827869
344	1	0	1	1	1	0.889010989	0.110989011	0.974233129	0.908466819	0.940201303	0.950208292	0.049791708	0.625	0.91540404	0.742827869
344	1	0	1	1	1	0.889010989	0.110989011	0.974233129	0.908466819	0.940201303	0.950208292	0.049791708	0.625	0.91540404	0.742827869
344	1	0	1	1	1	0.889010989	0.110989011	0.974233129	0.908466819	0.940201303	0.950208292	0.049791708	0.625	0.91540404	0.742827869
344	1	0	1	1	1	0.889010989	0.110989011	0.974233129	0.908466819	0.940201303	0.950208292	0.049791708	0.625	0.91540404	0.742827869
344	1	0	1	1	1	0.889010989	0.110989011	0.974233129	0.908466819	0.940201303	0.950208292	0.049791708	0.625	0.91540404	0.742827869
344	1	0	1	1	1	0.889010989	0.110989011	0.974233129	0.908466819	0.940201303	0.950208292	0.049791708	0.625	0.91540404	0.742827869
344	1	0	1	1	1	0.889010989	0.110989011	0.974233129	0.908466819	0.940201303	0.950208292	0.049791708	0.625	0.91540404	0.742827869
344	1	0	1	1	1	0.889010989	0.110989011	0.974233129	0.908466819	0.940201303	0.950208292	0.049791708	0.625	0.91540404	0.742827869
344	1	0	1	1	1	0.889010989	0.110989011	0.974233129	0.908466819	0.940201303	0.950208292	0.049791708	0.625	0.91540404	0.742827869
344	1	0	1	1	1	0.889010989	0.110989011	0.974233129	0.908466819	0.940201303	0.950208292	0.049791708	0.625	0.91540404	0.742827869
344	1	0	1	1	1	0.889010989	0.110989011	0.974233129	0.908466819	0.940201303	0.950208292	0.049791708	0.625	0.91540404	0.742827869
344	1	0	1	1	1	0.889010989	0.110989011	0.974233129	0.908466819	0.940201303	0.950208292	0.049791708	0.625	0.91540404	0.742827869
344	1	0	1	1	1	0.889010989	0.110989011	0.974233129	0.908466819	0.940201303	0.950208292	0.049791708	0.625	0.91540404	0.742827869
344	1	0	1	1	1	0.889010989	0.110989011	0.974233129	0.908466819	0.940201303	0.950208292	0.049791708	0.625	0.91540404	0.742827869
344	1	0	1	1	1	0.889010989	0.110989011	0.974233129	0.908466819	0.940201303	0.950208292	0.049791708	0.625	0.91540404	0.742827869
344	1	0	1	1	1	0.889010989	0.110989011	0.974233129	0.908466819	0.940201303	0.950208292	0.049791708	0.625	0.91540404	0.742827869
344	1	0	1	1	1	0.889010989	0.110989011	0.974233129	0.908466819	0.940201303	0.950208292	0.049791708	0.625	0.91540404	0.742827869
344	1	0	1	1	1	0.889010989	0.110989011	0.974233129	0.908466819	0.940201303	0.950208292	0.049791708	0.625	0.91540404	0.742827869
344	1	0	1	1	1	0.889010989	0.110989011	0.974233129	0.908466819	0.940201303	0.950208292	0.049791708	0.625	0.91540404	0.742827869
344	1	0	1	1	1	0.889010989	0.110989011	0.974233129	0.908466819	0.940201303	0.950208292	0.049791708	0.625	0.91540404	0.742827869
344	1	0	1	1	1	0.889010989	0.110989011	0.974233129	0.908466819	0.940201303	0.950208292	0.049791708	0.625	0.91540404	0.742827869
344	1	0	1	1	1	0.889010989	0.110989011	0.974233129	0.908466819	0.940201303	0.950208292	0.049791708	0.625	0.91540404	0.742827869
344	1	0	1	1	1	0.889010989	0.110989011	0.974233129	0.908466819	0.940201303	0.950208292	0.049791708	0.625	0.91540404	0.742827869
344	1	0	1	1	1	0.889010989	0.110989011	0.974233129	0.908466819	0.940201303	0.950208292	0.049791708	0.625	0.91540404	0.742827869
344	1	0	1	1	1	0.889010989	0.110989011	0.974233129	0.908466819	0.940201303	0.950208292	0.049791708	0.625	0.91540404	0.742827869
344	1	0	1	1	1	0.889010989	0.110989011	0.974233129	0.908466819	0.940201303	0.950208292	0.049791708	0.625	0.91540404	0.742827869
344	1	0	1	1	1	0.889010989	0.110989011	0.974233129	0.908466819	0.940201303	0.950208292	0.049791708	0.625	0.91540404	0.742827869
344	1	0	1	1	1	0.889010989	0.110989011	0.974233129	0.908466819	0.940201303	0.950208292	0.049791708	0.625	0.91540404	0.742827869
344	1	0	1	1	1	0.889010989	0.110989011	0.974233129	0.908466819	0.940201303	0.950208292	0.049791708	0.625	0.91540404	0.742827869
343	1	0	1	1	1	0.878076063	0.121923937	0.977301387	0.894919169	0.93429777	0.952329146	0.047670854	0.647373108	0.894218942	0.751033058
343	1	0	1	1	1	0.878076063	0.121923937	0.977301387	0.894919169	0.93429777	0.952329146	0.047670854	0.647373108	0.894218942	0.751033058
343	1	0	1	1	1	0.878076063	0.121923937	0.977301387	0.894919169	0.93429777	0.952329146	0.047670854	0.647373108	0.894218942	0.751033058
343	1	0	1	1	1	0.878076063	0.121923937	0.977301387	0.894919169	0.93429777	0.952329146	0.047670854	0.647373108	0.894218942	0.751033058
343	1	0	1	1	1	0.878076063	0.121923937	0.977301387	0.894919169	0.93429777	0.952329146	0.047670854	0.647373108	0.894218942	0.751033058
343	1	0	1	1	1	0.878076063	0.121923937	0.977301387	0.894919169	0.93429777	0.952329146	0.047670854	0.647373108	0.894218942	0.751033058
343	1	0	1	1	1	0.878076063	0.121923937	0.977301387	0.894919169	0.93429777	0.952329146	0.047670854	0.647373108	0.894218942	0.751033058
343	1	0	1	1	1	0.878076063	0.121923937	0.977301387	0.894919169	0.93429777	0.952329146	0.047670854	0.647373108	0.894218942	0.751033058
343	1	0	1	1	1	0.878076063	0.121923937	0.977301387	0.894919169	0.93429777	0.952329146	0.047670854	0.647373108	0.894218942	0.751033058
343	1	0	1	1	1	0.878076063	0.121923937	0.977301387	0.894919169	0.93429777	0.952329146	0.047670854	0.647373108	0.894218942	0.751033058
343	1	0	1	1	1	0.878076063	0.121923937	0.977301387	0.894919169	0.93429777	0.952329146	0.047670854	0.647373108	0.894218942	0.751033058
343	1	0	1	1	1	0.878076063	0.121923937	0.977301387	0.894919169	0.93429777	0.952329146	0.047670854	0.647373108	0.894218942	0.751033058
343	1	0	1	1	1	0.878076063	0.121923937	0.977301387	0.894919169	0.93429777	0.952329146	0.047670854	0.647373108	0.894218942	0.751033058
343	1	0	1	1	1	0.878076063	0.121923937	0.977301387	0.894919169	0.93429777	0.952329146	0.047670854	0.647373108	0.894218942	0.751033058
343	1	0	1	1	1	0.878076063	0.121923937	0.977301387	0.894919169	0.93429777	0.952329146	0.047670854	0.647373108	0.894218942	0.751033058
343	1	0	1	1	1	0.878076063	0.121923937	0.977301387	0.894919169	0.93429777	0.952329146	0.047670854	0.647373108	0.894218942	0.751033058
343	1	0	1	1	1	0.878076063	0.121923937	0.977301387	0.894919169	0.93429777	0.952329146	0.047670854	0.647373108	0.894218942	0.751033058
343	1	0	1	1	1	0.878076063	0.121923937	0.977301387	0.894919169	0.93429777	0.952329146	0.047670854	0.647373108	0.894218942	0.751033058
343	1	0	1	1	1	0.878076063	0.121923937	0.977301387	0.894919169	0.93429777	0.952329146	0.047670854	0.647373108	0.894218942	0.751033058
343	1	0	1	1	1	0.878076063	0.121923937	0.977301387	0.894919169	0.93429777	0.952329146	0.047670854	0.647373108	0.894218942	0.751033058
343	1	0	1	1	1	0.878076063	0.121923937	0.977301387	0.894919169	0.93429777	0.952329146	0.047670854	0.647373108	0.894218942	0.751033058
343	1	0	1	1	1	0.878076063	0.121923937	0.977301387	0.894919169	0.93429777	0.952329146	0.047670854	0.647373108	0.894218942	0.751033058
343	1	0	1	1	1	0.878076063	0.121923937	0.977301387	0.894919169	0.93429777	0.952329146	0.047670854	0.647373108	0.894218942	0.751033058
343	1	0	1	1	1	0.878076063	0.121923937	0.977301387	0.894919169	0.93429777	0.952329146	0.047670854	0.647373108	0.894218942	0.751033058
343	1	0	1	1	1	0.878076063	0.121923937	0.977301387	0.894919169	0.93429777	0.952329146	0.047670854	0.647373108	0.894218942	0.751033058
343	1	0	1	1	1	0.878076063	0.121923937	0.977301387	0.894919169	0.93429777	0.952329146	0.047670854	0.647373108	0.894218942	0.751033058
343	1	0	1	1	1	0.878076063	0.121923937	0.977301387	0.894919169	0.93429777	0.952329146	0.047670854	0.647373108	0.894218942	0.751033058
343	1	0	1	1	1	0.878076063	0.121923937	0.977301387	0.894919169	0.93429777	0.952329146	0.047670854	0.647373108	0.894218942	0.751033058
343	1	0	1	1	1	0.878076063	0.121923937	0.977301387	0.894919169	0.93429777	0.952329146	0.047670854	0.647373108	0.894218942	0.751033058
343	1	0	1	1	1	0.878076063	0.121923937	0.977301387	0.894919169	0.93429777	0.952329146	0.047670854	0.647373108	0.894218942	0.751033058
342	1	0	1	1	1	0.894009217	0.105990783	0.980842912	0.90887574	0.943488943	0.95513263	0.04486737	0.672367237	0.891408115	0.766546947
341	1	0	1	1	1	0.929328622	0.070671378	0.989860583	0.93757503	0.963008631	0.953772007	0.046227993	0.66440102	0.912485414	0.76892822
341	1	0	1	1	1	0.929328622	0.070671378	0.989860583	0.93757503	0.963008631	0.953772007	0.046227993	0.66440102	0.912485414	0.76892822
341	1	0	1	1	1	0.929328622	0.070671378	0.989860583	0.93757503	0.963008631	0.953772007	0.046227993	0.66440102	0.912485414	0.76892822
340	1	0	1	1	1	0.929328622	0.070671378	0.989860583	0.93757503	0.963008631	0.953772007	0.046227993	0.66440102	0.912485414	0.76892822
340	1	0	1	1	1	0.929328622	0.070671378	0.989860583	0.93757503	0.963008631	0.953772007	0.046227993	0.66440102	0.912485414	0.76892822
340	1	0	1	1	1	0.929328622	0.070671378	0.989860583	0.93757503	0.963008631	0.953772007	0.046227993	0.66440102	0.912485414	0.76892822
340	1	0	1	1	1	0.929328622	0.070671378	0.989860583	0.93757503	0.963008631	0.953772007	0.046227993	0.66440102	0.912485414	0.76892822
340	1	0	1	1	1	0.929328622	0.070671378	0.989860583	0.93757503	0.963008631	0.953772007	0.046227993	0.66440102	0.912485414	0.76892822
340	1	0	1	1	1	0.929328622	0.070671378	0.989860583	0.93757503	0.963008631	0.953772007	0.046227993	0.66440102	0.912485414	0.76892822
340	1	0	1	1	1	0.929328622	0.070671378	0.989860583	0.93757503	0.963008631	0.953772007	0.046227993	0.66440102	0.912485414	0.76892822
340	1	0	1	1	1	0.929328622	0.070671378	0.989860583	0.93757503	0.963008631	0.953772007	0.046227993	0.66440102	0.912485414	0.76892822
340	1	0	1	1	1	0.929328622	0.070671378	0.989860583	0.93757503	0.963008631	0.953772007	0.046227993	0.66440102	0.912485414	0.76892822
340	1	0	1	1	1	0.929328622	0.070671378	0.989860583	0.93757503	0.963008631	0.953772007	0.046227993	0.66440102	0.912485414	0.76892822
340	1	0	1	1	1	0.929328622	0.070671378	0.989860583	0.93757503	0.963008631	0.953772007	0.046227993	0.66440102	0.912485414	0.76892822
340	1	0	1	1	1	0.929328622	0.070671378	0.989860583	0.93757503	0.963008631	0.953772007	0.046227993	0.66440102	0.912485414	0.76892822
339	1	0	1	1	1	0.940571429	0.059428571	0.992691839	0.946573751	0.969084423	0.956167876	0.043832124	0.68971478	0.900677201	0.781204112
339	1	0	1	1	1	0.940571429	0.059428571	0.992691839	0.946573751	0.969084423	0.956167876	0.043832124	0.68971478	0.900677201	0.781204112
339	1	0	1	1	1	0.940571429	0.059428571	0.992691839	0.946573751	0.969084423	0.956167876	0.043832124	0.68971478	0.900677201	0.781204112
339	1	0	1	1	1	0.940571429	0.059428571	0.992691839	0.946573751	0.969084423	0.956167876	0.043832124	0.68971478	0.900677201	0.781204112
339	1	0	1	1	1	0.940571429	0.059428571	0.992691839	0.946573751	0.969084423	0.956167876	0.043832124	0.68971478	0.900677201	0.781204112
339	1	0	1	1	1	0.940571429	0.059428571	0.992691839	0.946573751	0.969084423	0.956167876	0.043832124	0.68971478	0.900677201	0.781204112
339	1	0	1	1	1	0.940571429	0.059428571	0.992691839	0.946573751	0.969084423	0.956167876	0.043832124	0.68971478	0.900677201	0.781204112
339	1	0	1	1	1	0.940571429	0.059428571	0.992691839	0.946573751	0.969084423	0.956167876	0.043832124	0.68971478	0.900677201	0.781204112
339	1	0	1	1	1	0.940571429	0.059428571	0.992691839	0.946573751	0.969084423	0.956167876	0.043832124	0.68971478	0.900677201	0.781204112
338	1	0	1	1	1	0.941647597	0.058352403	0.99270073	0.947735192	0.96969697	0.956176471	0.043823529	0.689982729	0.900789177	0.781418093
337	1	0	1	1	1	0.946285714	0.053714286	0.993946731	0.951332561	0.972172883	0.958823529	0.041176471	0.705467372	0.902934537	0.792079208
337	1	0	1	1	1	0.946285714	0.053714286	0.993946731	0.951332561	0.972172883	0.958823529	0.041176471	0.705467372	0.902934537	0.792079208
336	1	0	1	1	1	0.946285714	0.053714286	0.993946731	0.951332561	0.972172883	0.958823529	0.041176471	0.705467372	0.902934537	0.792079208
335	1	0	1	1	1	0.946285714	0.053714286	0.993946731	0.951332561	0.972172883	0.958823529	0.041176471	0.705467372	0.902934537	0.792079208
335	1	0	1	1	1	0.946285714	0.053714286	0.993946731	0.951332561	0.972172883	0.958823529	0.041176471	0.705467372	0.902934537	0.792079208
334	1	0	1	1	1	0.946285714	0.053714286	0.993946731	0.951332561	0.972172883	0.958823529	0.041176471	0.705467372	0.902934537	0.792079208
334	1	0	1	1	1	0.946285714	0.053714286	0.993946731	0.951332561	0.972172883	0.958823529	0.041176471	0.705467372	0.902934537	0.792079208
334	1	0	1	1	1	0.946285714	0.053714286	0.993946731	0.951332561	0.972172883	0.958823529	0.041176471	0.705467372	0.902934537	0.792079208
333	1	0	1	1	1	0.946224256	0.053775744	0.993939394	0.951276102	0.972139893	0.958827566	0.041172434	0.705726872	0.903043968	0.792284866
333	1	0	1	1	1	0.946224256	0.053775744	0.993939394	0.951276102	0.972139893	0.958827566	0.041172434	0.705726872	0.903043968	0.792284866
333	1	0	1	1	1	0.946224256	0.053775744	0.993939394	0.951276102	0.972139893	0.958827566	0.041172434	0.705726872	0.903043968	0.792284866
333	1	0	1	1	1	0.946224256	0.053775744	0.993939394	0.951276102	0.972139893	0.958827566	0.041172434	0.705726872	0.903043968	0.792284866
333	1	0	1	1	1	0.946224256	0.053775744	0.993939394	0.951276102	0.972139893	0.958827566	0.041172434	0.705726872	0.903043968	0.792284866
333	1	0	1	1	1	0.946224256	0.053775744	0.993939394	0.951276102	0.972139893	0.958827566	0.041172434	0.705726872	0.903043968	0.792284866
333	1	0	1	1	1	0.946224256	0.053775744	0.993939394	0.951276102	0.972139893	0.958827566	0.041172434	0.705726872	0.903043968	0.792284866
333	1	0	1	1	1	0.946224256	0.053775744	0.993939394	0.951276102	0.972139893	0.958827566	0.041172434	0.705726872	0.903043968	0.792284866
333	1	0	1	1	1	0.946224256	0.053775744	0.993939394	0.951276102	0.972139893	0.958827566	0.041172434	0.705726872	0.903043968	0.792284866
333	1	0	1	1	1	0.946224256	0.053775744	0.993939394	0.951276102	0.972139893	0.958827566	0.041172434	0.705726872	0.903043968	0.792284866
333	1	0	1	1	1	0.946224256	0.053775744	0.993939394	0.951276102	0.972139893	0.958827566	0.041172434	0.705726872	0.903043968	0.792284866
333	1	0	1	1	1	0.946224256	0.053775744	0.993939394	0.951276102	0.972139893	0.958827566	0.041172434	0.705726872	0.903043968	0.792284866
333	1	0	1	1	1	0.946224256	0.053775744	0.993939394	0.951276102	0.972139893	0.958827566	0.041172434	0.705726872	0.903043968	0.792284866
333	1	0	1	1	1	0.946224256	0.053775744	0.993939394	0.951276102	0.972139893	0.958827566	0.041172434	0.705726872	0.903043968	0.792284866
333	1	0	1	1	1	0.946224256	0.053775744	0.993939394	0.951276102	0.972139893	0.958827566	0.041172434	0.705726872	0.903043968	0.792284866
333	1	0	1	1	1	0.946224256	0.053775744	0.993939394	0.951276102	0.972139893	0.958827566	0.041172434	0.705726872	0.903043968	0.792284866
333	1	0	1	1	1	0.946224256	0.053775744	0.993939394	0.951276102	0.972139893	0.958827566	0.041172434	0.705726872	0.903043968	0.792284866
333	1	0	1	1	1	0.946224256	0.053775744	0.993939394	0.951276102	0.972139893	0.958827566	0.041172434	0.705726872	0.903043968	0.792284866
333	1	0	1	1	1	0.946224256	0.053775744	0.993939394	0.951276102	0.972139893	0.958827566	0.041172434	0.705726872	0.903043968	0.792284866
333	1	0	1	1	1	0.946224256	0.053775744	0.993939394	0.951276102	0.972139893	0.958827566	0.041172434	0.705726872	0.903043968	0.792284866
333	1	0	1	1	1	0.946224256	0.053775744	0.993939394	0.951276102	0.972139893	0.958827566	0.041172434	0.705726872	0.903043968	0.792284866
333	1	0	1	1	1	0.946224256	0.053775744	0.993939394	0.951276102	0.972139893	0.958827566	0.041172434	0.705726872	0.903043968	0.792284866
333	1	0	1	1	1	0.946224256	0.053775744	0.993939394	0.951276102	0.972139893	0.958827566	0.041172434	0.705726872	0.903043968	0.792284866
333	1	0	1	1	1	0.946224256	0.053775744	0.993939394	0.951276102	0.972139893	0.958827566	0.041172434	0.705726872	0.903043968	0.792284866
333	1	0	1	1	1	0.946224256	0.053775744	0.993939394	0.951276102	0.972139893	0.958827566	0.041172434	0.705726872	0.903043968	0.792284866
333	1	0	1	1	1	0.946224256	0.053775744	0.993939394	0.951276102	0.972139893	0.958827566	0.041172434	0.705726872	0.903043968	0.792284866
333	1	0	1	1	1	0.946224256	0.053775744	0.993939394	0.951276102	0.972139893	0.958827566	0.041172434	0.705726872	0.903043968	0.792284866
333	1	0	1	1	1	0.946224256	0.053775744	0.993939394	0.951276102	0.972139893	0.958827566	0.041172434	0.705726872	0.903043968	0.792284866
333	1	0	1	1	1	0.946224256	0.053775744	0.993939394	0.951276102	0.972139893	0.958827566	0.041172434	0.705726872	0.903043968	0.792284866
333	1	0	1	1	1	0.946224256	0.053775744	0.993939394	0.951276102	0.972139893	0.958827566	0.041172434	0.705726872	0.903043968	0.792284866
333	1	0	1	1	1	0.946224256	0.053775744	0.993939394	0.951276102	0.972139893	0.958827566	0.041172434	0.705726872	0.903043968	0.792284866
333	1	0	1	1	1	0.946224256	0.053775744	0.993939394	0.951276102	0.972139893	0.958827566	0.041172434	0.705726872	0.903043968	0.792284866
333	1	0	1	1	1	0.946224256	0.053775744	0.993939394	0.951276102	0.972139893	0.958827566	0.041172434	0.705726872	0.903043968	0.792284866
333	1	0	1	1	1	0.946224256	0.053775744	0.993939394	0.951276102	0.972139893	0.958827566	0.041172434	0.705726872	0.903043968	0.792284866
333	1	0	1	1	1	0.946224256	0.053775744	0.993939394	0.951276102	0.972139893	0.958827566	0.041172434	0.705726872	0.903043968	0.792284866
332	1	0	1	1	1	0.935897436	0.064102564	0.995006242	0.939858491	0.966646452	0.961451913	0.038548087	0.732484076	0.889502762	0.803393214
331	1	0	1	1	1	0.9375	0.0625	1	0.937432578	0.967706013	0.960553429	0.039446571	0.695945946	0.951501155	0.803902439
331	1	0	1	1	1	0.9375	0.0625	1	0.937432578	0.967706013	0.960553429	0.039446571	0.695945946	0.951501155	0.803902439
331	1	0	1	1	1	0.9375	0.0625	1	0.937432578	0.967706013	0.960553429	0.039446571	0.695945946	0.951501155	0.803902439
331	1	0	1	1	1	0.9375	0.0625	1	0.937432578	0.967706013	0.960553429	0.039446571	0.695945946	0.951501155	0.803902439
331	1	0	1	1	1	0.9375	0.0625	1	0.937432578	0.967706013	0.960553429	0.039446571	0.695945946	0.951501155	0.803902439
331	1	0	1	1	1	0.9375	0.0625	1	0.937432578	0.967706013	0.960553429	0.039446571	0.695945946	0.951501155	0.803902439
331	1	0	1	1	1	0.9375	0.0625	1	0.937432578	0.967706013	0.960553429	0.039446571	0.695945946	0.951501155	0.803902439
331	1	0	1	1	1	0.9375	0.0625	1	0.937432578	0.967706013	0.960553429	0.039446571	0.695945946	0.951501155	0.803902439
331	1	0	1	1	1	0.9375	0.0625	1	0.937432578	0.967706013	0.960553429	0.039446571	0.695945946	0.951501155	0.803902439
331	1	0	1	1	1	0.9375	0.0625	1	0.937432578	0.967706013	0.960553429	0.039446571	0.695945946	0.951501155	0.803902439
331	1	0	1	1	1	0.9375	0.0625	1	0.937432578	0.967706013	0.960553429	0.039446571	0.695945946	0.951501155	0.803902439
331	1	0	1	1	1	0.9375	0.0625	1	0.937432578	0.967706013	0.960553429	0.039446571	0.695945946	0.951501155	0.803902439
331	1	0	1	1	1	0.9375	0.0625	1	0.937432578	0.967706013	0.960553429	0.039446571	0.695945946	0.951501155	0.803902439
331	1	0	1	1	1	0.9375	0.0625	1	0.937432578	0.967706013	0.960553429	0.039446571	0.695945946	0.951501155	0.803902439
331	1	0	1	1	1	0.9375	0.0625	1	0.937432578	0.967706013	0.960553429	0.039446571	0.695945946	0.951501155	0.803902439
331	1	0	1	1	1	0.9375	0.0625	1	0.937432578	0.967706013	0.960553429	0.039446571	0.695945946	0.951501155	0.803902439
331	1	0	1	1	1	0.9375	0.0625	1	0.937432578	0.967706013	0.960553429	0.039446571	0.695945946	0.951501155	0.803902439
331	1	0	1	1	1	0.9375	0.0625	1	0.937432578	0.967706013	0.960553429	0.039446571	0.695945946	0.951501155	0.803902439
331	1	0	1	1	1	0.9375	0.0625	1	0.937432578	0.967706013	0.960553429	0.039446571	0.695945946	0.951501155	0.803902439
331	1	0	1	1	1	0.9375	0.0625	1	0.937432578	0.967706013	0.960553429	0.039446571	0.695945946	0.951501155	0.803902439
331	1	0	1	1	1	0.9375	0.0625	1	0.937432578	0.967706013	0.960553429	0.039446571	0.695945946	0.951501155	0.803902439
331	1	0	1	1	1	0.9375	0.0625	1	0.937432578	0.967706013	0.960553429	0.039446571	0.695945946	0.951501155	0.803902439
331	1	0	1	1	1	0.9375	0.0625	1	0.937432578	0.967706013	0.960553429	0.039446571	0.695945946	0.951501155	0.803902439
331	1	0	1	1	1	0.9375	0.0625	1	0.937432578	0.967706013	0.960553429	0.039446571	0.695945946	0.951501155	0.803902439
331	1	0	1	1	1	0.9375	0.0625	1	0.937432578	0.967706013	0.960553429	0.039446571	0.695945946	0.951501155	0.803902439
331	1	0	1	1	1	0.9375	0.0625	1	0.937432578	0.967706013	0.960553429	0.039446571	0.695945946	0.951501155	0.803902439
331	1	0	1	1	1	0.9375	0.0625	1	0.937432578	0.967706013	0.960553429	0.039446571	0.695945946	0.951501155	0.803902439
331	1	0	1	1	1	0.9375	0.0625	1	0.937432578	0.967706013	0.960553429	0.039446571	0.695945946	0.951501155	0.803902439
331	1	0	1	1	1	0.9375	0.0625	1	0.937432578	0.967706013	0.960553429	0.039446571	0.695945946	0.951501155	0.803902439
331	1	0	1	1	1	0.9375	0.0625	1	0.937432578	0.967706013	0.960553429	0.039446571	0.695945946	0.951501155	0.803902439
331	1	0	1	1	1	0.9375	0.0625	1	0.937432578	0.967706013	0.960553429	0.039446571	0.695945946	0.951501155	0.803902439
331	1	0	1	1	1	0.9375	0.0625	1	0.937432578	0.967706013	0.960553429	0.039446571	0.695945946	0.951501155	0.803902439
331	1	0	1	1	1	0.9375	0.0625	1	0.937432578	0.967706013	0.960553429	0.039446571	0.695945946	0.951501155	0.803902439
331	1	0	1	1	1	0.9375	0.0625	1	0.937432578	0.967706013	0.960553429	0.039446571	0.695945946	0.951501155	0.803902439
331	1	0	1	1	1	0.9375	0.0625	1	0.937432578	0.967706013	0.960553429	0.039446571	0.695945946	0.951501155	0.803902439
331	1	0	1	1	1	0.9375	0.0625	1	0.937432578	0.967706013	0.960553429	0.039446571	0.695945946	0.951501155	0.803902439
331	1	0	1	1	1	0.9375	0.0625	1	0.937432578	0.967706013	0.960553429	0.039446571	0.695945946	0.951501155	0.803902439
331	1	0	1	1	1	0.9375	0.0625	1	0.937432578	0.967706013	0.960553429	0.039446571	0.695945946	0.951501155	0.803902439
331	1	0	1	1	1	0.9375	0.0625	1	0.937432578	0.967706013	0.960553429	0.039446571	0.695945946	0.951501155	0.803902439
331	1	0	1	1	1	0.9375	0.0625	1	0.937432578	0.967706013	0.960553429	0.039446571	0.695945946	0.951501155	0.803902439
331	1	0	1	1	1	0.9375	0.0625	1	0.937432578	0.967706013	0.960553429	0.039446571	0.695945946	0.951501155	0.803902439
331	1	0	1	1	1	0.9375	0.0625	1	0.937432578	0.967706013	0.960553429	0.039446571	0.695945946	0.951501155	0.803902439
331	1	0	1	1	1	0.9375	0.0625	1	0.937432578	0.967706013	0.960553429	0.039446571	0.695945946	0.951501155	0.803902439
331	1	0	1	1	1	0.9375	0.0625	1	0.937432578	0.967706013	0.960553429	0.039446571	0.695945946	0.951501155	0.803902439
331	1	0	1	1	1	0.9375	0.0625	1	0.937432578	0.967706013	0.960553429	0.039446571	0.695945946	0.951501155	0.803902439
331	1	0	1	1	1	0.9375	0.0625	1	0.937432578	0.967706013	0.960553429	0.039446571	0.695945946	0.951501155	0.803902439
331	1	0	1	1	1	0.9375	0.0625	1	0.937432578	0.967706013	0.960553429	0.039446571	0.695945946	0.951501155	0.803902439
331	1	0	1	1	1	0.9375	0.0625	1	0.937432578	0.967706013	0.960553429	0.039446571	0.695945946	0.951501155	0.803902439
331	1	0	1	1	1	0.9375	0.0625	1	0.937432578	0.967706013	0.960553429	0.039446571	0.695945946	0.951501155	0.803902439
331	1	0	1	1	1	0.9375	0.0625	1	0.937432578	0.967706013	0.960553429	0.039446571	0.695945946	0.951501155	0.803902439
331	1	0	1	1	1	0.9375	0.0625	1	0.937432578	0.967706013	0.960553429	0.039446571	0.695945946	0.951501155	0.803902439
331	1	0	1	1	1	0.9375	0.0625	1	0.937432578	0.967706013	0.960553429	0.039446571	0.695945946	0.951501155	0.803902439
331	1	0	1	1	1	0.9375	0.0625	1	0.937432578	0.967706013	0.960553429	0.039446571	0.695945946	0.951501155	0.803902439
331	1	0	1	1	1	0.9375	0.0625	1	0.937432578	0.967706013	0.960553429	0.039446571	0.695945946	0.951501155	0.803902439
331	1	0	1	1	1	0.9375	0.0625	1	0.937432578	0.967706013	0.960553429	0.039446571	0.695945946	0.951501155	0.803902439
331	1	0	1	1	1	0.9375	0.0625	1	0.937432578	0.967706013	0.960553429	0.039446571	0.695945946	0.951501155	0.803902439
331	1	0	1	1	1	0.9375	0.0625	1	0.937432578	0.967706013	0.960553429	0.039446571	0.695945946	0.951501155	0.803902439
331	1	0	1	1	1	0.9375	0.0625	1	0.937432578	0.967706013	0.960553429	0.039446571	0.695945946	0.951501155	0.803902439
331	1	0	1	1	1	0.9375	0.0625	1	0.937432578	0.967706013	0.960553429	0.039446571	0.695945946	0.951501155	0.803902439
331	1	0	1	1	1	0.9375	0.0625	1	0.937432578	0.967706013	0.960553429	0.039446571	0.695945946	0.951501155	0.803902439
331	1	0	1	1	1	0.9375	0.0625	1	0.937432578	0.967706013	0.960553429	0.039446571	0.695945946	0.951501155	0.803902439
331	1	0	1	1	1	0.9375	0.0625	1	0.937432578	0.967706013	0.960553429	0.039446571	0.695945946	0.951501155	0.803902439
331	1	0	1	1	1	0.9375	0.0625	1	0.937432578	0.967706013	0.960553429	0.039446571	0.695945946	0.951501155	0.803902439
331	1	0	1	1	1	0.9375	0.0625	1	0.937432578	0.967706013	0.960553429	0.039446571	0.695945946	0.951501155	0.803902439
331	1	0	1	1	1	0.9375	0.0625	1	0.937432578	0.967706013	0.960553429	0.039446571	0.695945946	0.951501155	0.803902439
331	1	0	1	1	1	0.9375	0.0625	1	0.937432578	0.967706013	0.960553429	0.039446571	0.695945946	0.951501155	0.803902439
331	1	0	1	1	1	0.9375	0.0625	1	0.937432578	0.967706013	0.960553429	0.039446571	0.695945946	0.951501155	0.803902439
331	1	0	1	1	1	0.9375	0.0625	1	0.937432578	0.967706013	0.960553429	0.039446571	0.695945946	0.951501155	0.803902439
331	1	0	1	1	1	0.9375	0.0625	1	0.937432578	0.967706013	0.960553429	0.039446571	0.695945946	0.951501155	0.803902439
331	1	0	1	1	1	0.9375	0.0625	1	0.937432578	0.967706013	0.960553429	0.039446571	0.695945946	0.951501155	0.803902439
331	1	0	1	1	1	0.9375	0.0625	1	0.937432578	0.967706013	0.960553429	0.039446571	0.695945946	0.951501155	0.803902439
331	1	0	1	1	1	0.9375	0.0625	1	0.937432578	0.967706013	0.960553429	0.039446571	0.695945946	0.951501155	0.803902439
331	1	0	1	1	1	0.9375	0.0625	1	0.937432578	0.967706013	0.960553429	0.039446571	0.695945946	0.951501155	0.803902439
331	1	0	1	1	1	0.9375	0.0625	1	0.937432578	0.967706013	0.960553429	0.039446571	0.695945946	0.951501155	0.803902439
331	1	0	1	1	1	0.9375	0.0625	1	0.937432578	0.967706013	0.960553429	0.039446571	0.695945946	0.951501155	0.803902439
331	1	0	1	1	1	0.9375	0.0625	1	0.937432578	0.967706013	0.960553429	0.039446571	0.695945946	0.951501155	0.803902439
331	1	0	1	1	1	0.9375	0.0625	1	0.937432578	0.967706013	0.960553429	0.039446571	0.695945946	0.951501155	0.803902439
331	1	0	1	1	1	0.9375	0.0625	1	0.937432578	0.967706013	0.960553429	0.039446571	0.695945946	0.951501155	0.803902439
331	1	0	1	1	1	0.9375	0.0625	1	0.937432578	0.967706013	0.960553429	0.039446571	0.695945946	0.951501155	0.803902439
331	1	0	1	1	1	0.9375	0.0625	1	0.937432578	0.967706013	0.960553429	0.039446571	0.695945946	0.951501155	0.803902439
331	1	0	1	1	1	0.9375	0.0625	1	0.937432578	0.967706013	0.960553429	0.039446571	0.695945946	0.951501155	0.803902439
331	1	0	1	1	1	0.9375	0.0625	1	0.937432578	0.967706013	0.960553429	0.039446571	0.695945946	0.951501155	0.803902439
331	1	0	1	1	1	0.9375	0.0625	1	0.937432578	0.967706013	0.960553429	0.039446571	0.695945946	0.951501155	0.803902439
331	1	0	1	1	1	0.9375	0.0625	1	0.937432578	0.967706013	0.960553429	0.039446571	0.695945946	0.951501155	0.803902439
