# Supplementary material for: An Improved Hybrid Feature Selection Algorithm for Electric Charge Recovery Risk
Source: Hindawi journal article supplement (doi:10.1155/2020/8479341), 2020-08-28
Supplement: f1 [file 8479341.f1.zip › 8479341.f1/Experimental Results/201808/BWOA_results.csv]

features_num	Accuracy_high	Loss_high	Precission_high	Recall_high	F1_high	Accuracy_med	Loss_med	Precission_med	Recall_med	F1_med	Accuracy_low	Loss_low	Precission_low	Recall_low	F1_low
377	1.0	0.0	1.0	1.0	1.0	0.8366533864541833	0.1633466135458167	0.9984152139461173	0.8377659574468085	0.9110629067245118	0.9564545717871971	0.04354542821280294	0.7817652764306499	0.7810077519379846	0.7813863305865244
377	1.0	0.0	1.0	1.0	1.0	0.8366533864541833	0.1633466135458167	0.9984152139461173	0.8377659574468085	0.9110629067245118	0.9564545717871971	0.04354542821280294	0.7817652764306499	0.7810077519379846	0.7813863305865244
377	1.0	0.0	1.0	1.0	1.0	0.8366533864541833	0.1633466135458167	0.9984152139461173	0.8377659574468085	0.9110629067245118	0.9564545717871971	0.04354542821280294	0.7817652764306499	0.7810077519379846	0.7813863305865244
323	1.0	0.0	1.0	1.0	1.0	0.9175704989154013	0.08242950108459868	0.9928741092636579	0.9227373068432672	0.9565217391304348	0.9537914691943128	0.04620853080568721	0.6478040540540541	0.9376528117359413	0.7662337662337662
323	1.0	0.0	1.0	1.0	1.0	0.9175704989154013	0.08242950108459868	0.9928741092636579	0.9227373068432672	0.9565217391304348	0.9537914691943128	0.04620853080568721	0.6478040540540541	0.9376528117359413	0.7662337662337662
323	1.0	0.0	1.0	1.0	1.0	0.9175704989154013	0.08242950108459868	0.9928741092636579	0.9227373068432672	0.9565217391304348	0.9537914691943128	0.04620853080568721	0.6478040540540541	0.9376528117359413	0.7662337662337662
323	1.0	0.0	1.0	1.0	1.0	0.9175704989154013	0.08242950108459868	0.9928741092636579	0.9227373068432672	0.9565217391304348	0.9537914691943128	0.04620853080568721	0.6478040540540541	0.9376528117359413	0.7662337662337662
323	1.0	0.0	1.0	1.0	1.0	0.9175704989154013	0.08242950108459868	0.9928741092636579	0.9227373068432672	0.9565217391304348	0.9537914691943128	0.04620853080568721	0.6478040540540541	0.9376528117359413	0.7662337662337662
323	1.0	0.0	1.0	1.0	1.0	0.9175704989154013	0.08242950108459868	0.9928741092636579	0.9227373068432672	0.9565217391304348	0.9537914691943128	0.04620853080568721	0.6478040540540541	0.9376528117359413	0.7662337662337662
323	1.0	0.0	1.0	1.0	1.0	0.9175704989154013	0.08242950108459868	0.9928741092636579	0.9227373068432672	0.9565217391304348	0.9537914691943128	0.04620853080568721	0.6478040540540541	0.9376528117359413	0.7662337662337662
323	1.0	0.0	1.0	1.0	1.0	0.9175704989154013	0.08242950108459868	0.9928741092636579	0.9227373068432672	0.9565217391304348	0.9537914691943128	0.04620853080568721	0.6478040540540541	0.9376528117359413	0.7662337662337662
323	1.0	0.0	1.0	1.0	1.0	0.9175704989154013	0.08242950108459868	0.9928741092636579	0.9227373068432672	0.9565217391304348	0.9537914691943128	0.04620853080568721	0.6478040540540541	0.9376528117359413	0.7662337662337662
323	1.0	0.0	1.0	1.0	1.0	0.9175704989154013	0.08242950108459868	0.9928741092636579	0.9227373068432672	0.9565217391304348	0.9537914691943128	0.04620853080568721	0.6478040540540541	0.9376528117359413	0.7662337662337662
323	1.0	0.0	1.0	1.0	1.0	0.9175704989154013	0.08242950108459868	0.9928741092636579	0.9227373068432672	0.9565217391304348	0.9537914691943128	0.04620853080568721	0.6478040540540541	0.9376528117359413	0.7662337662337662
323	1.0	0.0	1.0	1.0	1.0	0.9175704989154013	0.08242950108459868	0.9928741092636579	0.9227373068432672	0.9565217391304348	0.9537914691943128	0.04620853080568721	0.6478040540540541	0.9376528117359413	0.7662337662337662
323	1.0	0.0	1.0	1.0	1.0	0.9175704989154013	0.08242950108459868	0.9928741092636579	0.9227373068432672	0.9565217391304348	0.9537914691943128	0.04620853080568721	0.6478040540540541	0.9376528117359413	0.7662337662337662
323	1.0	0.0	1.0	1.0	1.0	0.9175704989154013	0.08242950108459868	0.9928741092636579	0.9227373068432672	0.9565217391304348	0.9537914691943128	0.04620853080568721	0.6478040540540541	0.9376528117359413	0.7662337662337662
323	1.0	0.0	1.0	1.0	1.0	0.9175704989154013	0.08242950108459868	0.9928741092636579	0.9227373068432672	0.9565217391304348	0.9537914691943128	0.04620853080568721	0.6478040540540541	0.9376528117359413	0.7662337662337662
323	1.0	0.0	1.0	1.0	1.0	0.9175704989154013	0.08242950108459868	0.9928741092636579	0.9227373068432672	0.9565217391304348	0.9537914691943128	0.04620853080568721	0.6478040540540541	0.9376528117359413	0.7662337662337662
290	1.0	0.0	1.0	1.0	1.0	0.8484848484848485	0.1515151515151515	1.0	0.8482428115015974	0.9178910976663786	0.9715865751334859	0.028413424866514103	0.9373104145601617	0.7970765262252795	0.8615241635687731
290	1.0	0.0	1.0	1.0	1.0	0.8484848484848485	0.1515151515151515	1.0	0.8482428115015974	0.9178910976663786	0.9715865751334859	0.028413424866514103	0.9373104145601617	0.7970765262252795	0.8615241635687731
290	1.0	0.0	1.0	1.0	1.0	0.8484848484848485	0.1515151515151515	1.0	0.8482428115015974	0.9178910976663786	0.9715865751334859	0.028413424866514103	0.9373104145601617	0.7970765262252795	0.8615241635687731
290	1.0	0.0	1.0	1.0	1.0	0.8484848484848485	0.1515151515151515	1.0	0.8482428115015974	0.9178910976663786	0.9715865751334859	0.028413424866514103	0.9373104145601617	0.7970765262252795	0.8615241635687731
290	1.0	0.0	1.0	1.0	1.0	0.8484848484848485	0.1515151515151515	1.0	0.8482428115015974	0.9178910976663786	0.9715865751334859	0.028413424866514103	0.9373104145601617	0.7970765262252795	0.8615241635687731
290	1.0	0.0	1.0	1.0	1.0	0.8484848484848485	0.1515151515151515	1.0	0.8482428115015974	0.9178910976663786	0.9715865751334859	0.028413424866514103	0.9373104145601617	0.7970765262252795	0.8615241635687731
290	1.0	0.0	1.0	1.0	1.0	0.8484848484848485	0.1515151515151515	1.0	0.8482428115015974	0.9178910976663786	0.9715865751334859	0.028413424866514103	0.9373104145601617	0.7970765262252795	0.8615241635687731
290	1.0	0.0	1.0	1.0	1.0	0.8484848484848485	0.1515151515151515	1.0	0.8482428115015974	0.9178910976663786	0.9715865751334859	0.028413424866514103	0.9373104145601617	0.7970765262252795	0.8615241635687731
290	1.0	0.0	1.0	1.0	1.0	0.8484848484848485	0.1515151515151515	1.0	0.8482428115015974	0.9178910976663786	0.9715865751334859	0.028413424866514103	0.9373104145601617	0.7970765262252795	0.8615241635687731
290	1.0	0.0	1.0	1.0	1.0	0.8484848484848485	0.1515151515151515	1.0	0.8482428115015974	0.9178910976663786	0.9715865751334859	0.028413424866514103	0.9373104145601617	0.7970765262252795	0.8615241635687731
290	1.0	0.0	1.0	1.0	1.0	0.8484848484848485	0.1515151515151515	1.0	0.8482428115015974	0.9178910976663786	0.9715865751334859	0.028413424866514103	0.9373104145601617	0.7970765262252795	0.8615241635687731
290	1.0	0.0	1.0	1.0	1.0	0.8484848484848485	0.1515151515151515	1.0	0.8482428115015974	0.9178910976663786	0.9715865751334859	0.028413424866514103	0.9373104145601617	0.7970765262252795	0.8615241635687731
290	1.0	0.0	1.0	1.0	1.0	0.8484848484848485	0.1515151515151515	1.0	0.8482428115015974	0.9178910976663786	0.9715865751334859	0.028413424866514103	0.9373104145601617	0.7970765262252795	0.8615241635687731
290	1.0	0.0	1.0	1.0	1.0	0.8484848484848485	0.1515151515151515	1.0	0.8482428115015974	0.9178910976663786	0.9715865751334859	0.028413424866514103	0.9373104145601617	0.7970765262252795	0.8615241635687731
290	1.0	0.0	1.0	1.0	1.0	0.8484848484848485	0.1515151515151515	1.0	0.8482428115015974	0.9178910976663786	0.9715865751334859	0.028413424866514103	0.9373104145601617	0.7970765262252795	0.8615241635687731
290	1.0	0.0	1.0	1.0	1.0	0.8484848484848485	0.1515151515151515	1.0	0.8482428115015974	0.9178910976663786	0.9715865751334859	0.028413424866514103	0.9373104145601617	0.7970765262252795	0.8615241635687731
290	1.0	0.0	1.0	1.0	1.0	0.8484848484848485	0.1515151515151515	1.0	0.8482428115015974	0.9178910976663786	0.9715865751334859	0.028413424866514103	0.9373104145601617	0.7970765262252795	0.8615241635687731
290	1.0	0.0	1.0	1.0	1.0	0.8484848484848485	0.1515151515151515	1.0	0.8482428115015974	0.9178910976663786	0.9715865751334859	0.028413424866514103	0.9373104145601617	0.7970765262252795	0.8615241635687731
290	1.0	0.0	1.0	1.0	1.0	0.8484848484848485	0.1515151515151515	1.0	0.8482428115015974	0.9178910976663786	0.9715865751334859	0.028413424866514103	0.9373104145601617	0.7970765262252795	0.8615241635687731
290	1.0	0.0	1.0	1.0	1.0	0.8484848484848485	0.1515151515151515	1.0	0.8482428115015974	0.9178910976663786	0.9715865751334859	0.028413424866514103	0.9373104145601617	0.7970765262252795	0.8615241635687731
290	1.0	0.0	1.0	1.0	1.0	0.8484848484848485	0.1515151515151515	1.0	0.8482428115015974	0.9178910976663786	0.9715865751334859	0.028413424866514103	0.9373104145601617	0.7970765262252795	0.8615241635687731
290	1.0	0.0	1.0	1.0	1.0	0.8484848484848485	0.1515151515151515	1.0	0.8482428115015974	0.9178910976663786	0.9715865751334859	0.028413424866514103	0.9373104145601617	0.7970765262252795	0.8615241635687731
290	1.0	0.0	1.0	1.0	1.0	0.8484848484848485	0.1515151515151515	1.0	0.8482428115015974	0.9178910976663786	0.9715865751334859	0.028413424866514103	0.9373104145601617	0.7970765262252795	0.8615241635687731
290	1.0	0.0	1.0	1.0	1.0	0.8484848484848485	0.1515151515151515	1.0	0.8482428115015974	0.9178910976663786	0.9715865751334859	0.028413424866514103	0.9373104145601617	0.7970765262252795	0.8615241635687731
290	1.0	0.0	1.0	1.0	1.0	0.8484848484848485	0.1515151515151515	1.0	0.8482428115015974	0.9178910976663786	0.9715865751334859	0.028413424866514103	0.9373104145601617	0.7970765262252795	0.8615241635687731
290	1.0	0.0	1.0	1.0	1.0	0.8484848484848485	0.1515151515151515	1.0	0.8482428115015974	0.9178910976663786	0.9715865751334859	0.028413424866514103	0.9373104145601617	0.7970765262252795	0.8615241635687731
290	1.0	0.0	1.0	1.0	1.0	0.8484848484848485	0.1515151515151515	1.0	0.8482428115015974	0.9178910976663786	0.9715865751334859	0.028413424866514103	0.9373104145601617	0.7970765262252795	0.8615241635687731
290	1.0	0.0	1.0	1.0	1.0	0.8484848484848485	0.1515151515151515	1.0	0.8482428115015974	0.9178910976663786	0.9715865751334859	0.028413424866514103	0.9373104145601617	0.7970765262252795	0.8615241635687731
290	1.0	0.0	1.0	1.0	1.0	0.8484848484848485	0.1515151515151515	1.0	0.8482428115015974	0.9178910976663786	0.9715865751334859	0.028413424866514103	0.9373104145601617	0.7970765262252795	0.8615241635687731
290	1.0	0.0	1.0	1.0	1.0	0.8484848484848485	0.1515151515151515	1.0	0.8482428115015974	0.9178910976663786	0.9715865751334859	0.028413424866514103	0.9373104145601617	0.7970765262252795	0.8615241635687731
290	1.0	0.0	1.0	1.0	1.0	0.8484848484848485	0.1515151515151515	1.0	0.8482428115015974	0.9178910976663786	0.9715865751334859	0.028413424866514103	0.9373104145601617	0.7970765262252795	0.8615241635687731
290	1.0	0.0	1.0	1.0	1.0	0.8484848484848485	0.1515151515151515	1.0	0.8482428115015974	0.9178910976663786	0.9715865751334859	0.028413424866514103	0.9373104145601617	0.7970765262252795	0.8615241635687731
290	1.0	0.0	1.0	1.0	1.0	0.8484848484848485	0.1515151515151515	1.0	0.8482428115015974	0.9178910976663786	0.9715865751334859	0.028413424866514103	0.9373104145601617	0.7970765262252795	0.8615241635687731
341	1.0	0.0	1.0	1.0	1.0	0.8161764705882353	0.18382352941176472	0.9984962406015038	0.8167281672816729	0.8985115020297699	0.981645139360979	0.01835486063902103	0.8952668680765358	0.9127310061601642	0.9039145907473309
341	1.0	0.0	1.0	1.0	1.0	0.8161764705882353	0.18382352941176472	0.9984962406015038	0.8167281672816729	0.8985115020297699	0.981645139360979	0.01835486063902103	0.8952668680765358	0.9127310061601642	0.9039145907473309
341	1.0	0.0	1.0	1.0	1.0	0.8161764705882353	0.18382352941176472	0.9984962406015038	0.8167281672816729	0.8985115020297699	0.981645139360979	0.01835486063902103	0.8952668680765358	0.9127310061601642	0.9039145907473309
341	1.0	0.0	1.0	1.0	1.0	0.8161764705882353	0.18382352941176472	0.9984962406015038	0.8167281672816729	0.8985115020297699	0.981645139360979	0.01835486063902103	0.8952668680765358	0.9127310061601642	0.9039145907473309
341	1.0	0.0	1.0	1.0	1.0	0.8161764705882353	0.18382352941176472	0.9984962406015038	0.8167281672816729	0.8985115020297699	0.981645139360979	0.01835486063902103	0.8952668680765358	0.9127310061601642	0.9039145907473309
341	1.0	0.0	1.0	1.0	1.0	0.8161764705882353	0.18382352941176472	0.9984962406015038	0.8167281672816729	0.8985115020297699	0.981645139360979	0.01835486063902103	0.8952668680765358	0.9127310061601642	0.9039145907473309
341	1.0	0.0	1.0	1.0	1.0	0.8161764705882353	0.18382352941176472	0.9984962406015038	0.8167281672816729	0.8985115020297699	0.981645139360979	0.01835486063902103	0.8952668680765358	0.9127310061601642	0.9039145907473309
341	1.0	0.0	1.0	1.0	1.0	0.8161764705882353	0.18382352941176472	0.9984962406015038	0.8167281672816729	0.8985115020297699	0.981645139360979	0.01835486063902103	0.8952668680765358	0.9127310061601642	0.9039145907473309
341	1.0	0.0	1.0	1.0	1.0	0.8161764705882353	0.18382352941176472	0.9984962406015038	0.8167281672816729	0.8985115020297699	0.981645139360979	0.01835486063902103	0.8952668680765358	0.9127310061601642	0.9039145907473309
341	1.0	0.0	1.0	1.0	1.0	0.8161764705882353	0.18382352941176472	0.9984962406015038	0.8167281672816729	0.8985115020297699	0.981645139360979	0.01835486063902103	0.8952668680765358	0.9127310061601642	0.9039145907473309
341	1.0	0.0	1.0	1.0	1.0	0.8161764705882353	0.18382352941176472	0.9984962406015038	0.8167281672816729	0.8985115020297699	0.981645139360979	0.01835486063902103	0.8952668680765358	0.9127310061601642	0.9039145907473309
341	1.0	0.0	1.0	1.0	1.0	0.8161764705882353	0.18382352941176472	0.9984962406015038	0.8167281672816729	0.8985115020297699	0.981645139360979	0.01835486063902103	0.8952668680765358	0.9127310061601642	0.9039145907473309
341	1.0	0.0	1.0	1.0	1.0	0.8161764705882353	0.18382352941176472	0.9984962406015038	0.8167281672816729	0.8985115020297699	0.981645139360979	0.01835486063902103	0.8952668680765358	0.9127310061601642	0.9039145907473309
341	1.0	0.0	1.0	1.0	1.0	0.8161764705882353	0.18382352941176472	0.9984962406015038	0.8167281672816729	0.8985115020297699	0.981645139360979	0.01835486063902103	0.8952668680765358	0.9127310061601642	0.9039145907473309
341	1.0	0.0	1.0	1.0	1.0	0.8161764705882353	0.18382352941176472	0.9984962406015038	0.8167281672816729	0.8985115020297699	0.981645139360979	0.01835486063902103	0.8952668680765358	0.9127310061601642	0.9039145907473309
341	1.0	0.0	1.0	1.0	1.0	0.8161764705882353	0.18382352941176472	0.9984962406015038	0.8167281672816729	0.8985115020297699	0.981645139360979	0.01835486063902103	0.8952668680765358	0.9127310061601642	0.9039145907473309
341	1.0	0.0	1.0	1.0	1.0	0.8161764705882353	0.18382352941176472	0.9984962406015038	0.8167281672816729	0.8985115020297699	0.981645139360979	0.01835486063902103	0.8952668680765358	0.9127310061601642	0.9039145907473309
341	1.0	0.0	1.0	1.0	1.0	0.8161764705882353	0.18382352941176472	0.9984962406015038	0.8167281672816729	0.8985115020297699	0.981645139360979	0.01835486063902103	0.8952668680765358	0.9127310061601642	0.9039145907473309
341	1.0	0.0	1.0	1.0	1.0	0.8161764705882353	0.18382352941176472	0.9984962406015038	0.8167281672816729	0.8985115020297699	0.981645139360979	0.01835486063902103	0.8952668680765358	0.9127310061601642	0.9039145907473309
341	1.0	0.0	1.0	1.0	1.0	0.8161764705882353	0.18382352941176472	0.9984962406015038	0.8167281672816729	0.8985115020297699	0.981645139360979	0.01835486063902103	0.8952668680765358	0.9127310061601642	0.9039145907473309
341	1.0	0.0	1.0	1.0	1.0	0.8161764705882353	0.18382352941176472	0.9984962406015038	0.8167281672816729	0.8985115020297699	0.981645139360979	0.01835486063902103	0.8952668680765358	0.9127310061601642	0.9039145907473309
341	1.0	0.0	1.0	1.0	1.0	0.8161764705882353	0.18382352941176472	0.9984962406015038	0.8167281672816729	0.8985115020297699	0.981645139360979	0.01835486063902103	0.8952668680765358	0.9127310061601642	0.9039145907473309
341	1.0	0.0	1.0	1.0	1.0	0.8161764705882353	0.18382352941176472	0.9984962406015038	0.8167281672816729	0.8985115020297699	0.981645139360979	0.01835486063902103	0.8952668680765358	0.9127310061601642	0.9039145907473309
341	1.0	0.0	1.0	1.0	1.0	0.8161764705882353	0.18382352941176472	0.9984962406015038	0.8167281672816729	0.8985115020297699	0.981645139360979	0.01835486063902103	0.8952668680765358	0.9127310061601642	0.9039145907473309
341	1.0	0.0	1.0	1.0	1.0	0.8161764705882353	0.18382352941176472	0.9984962406015038	0.8167281672816729	0.8985115020297699	0.981645139360979	0.01835486063902103	0.8952668680765358	0.9127310061601642	0.9039145907473309
341	1.0	0.0	1.0	1.0	1.0	0.8161764705882353	0.18382352941176472	0.9984962406015038	0.8167281672816729	0.8985115020297699	0.981645139360979	0.01835486063902103	0.8952668680765358	0.9127310061601642	0.9039145907473309
341	1.0	0.0	1.0	1.0	1.0	0.8161764705882353	0.18382352941176472	0.9984962406015038	0.8167281672816729	0.8985115020297699	0.981645139360979	0.01835486063902103	0.8952668680765358	0.9127310061601642	0.9039145907473309
341	1.0	0.0	1.0	1.0	1.0	0.8161764705882353	0.18382352941176472	0.9984962406015038	0.8167281672816729	0.8985115020297699	0.981645139360979	0.01835486063902103	0.8952668680765358	0.9127310061601642	0.9039145907473309
341	1.0	0.0	1.0	1.0	1.0	0.8161764705882353	0.18382352941176472	0.9984962406015038	0.8167281672816729	0.8985115020297699	0.981645139360979	0.01835486063902103	0.8952668680765358	0.9127310061601642	0.9039145907473309
341	1.0	0.0	1.0	1.0	1.0	0.8161764705882353	0.18382352941176472	0.9984962406015038	0.8167281672816729	0.8985115020297699	0.981645139360979	0.01835486063902103	0.8952668680765358	0.9127310061601642	0.9039145907473309
341	1.0	0.0	1.0	1.0	1.0	0.8161764705882353	0.18382352941176472	0.9984962406015038	0.8167281672816729	0.8985115020297699	0.981645139360979	0.01835486063902103	0.8952668680765358	0.9127310061601642	0.9039145907473309
341	1.0	0.0	1.0	1.0	1.0	0.8161764705882353	0.18382352941176472	0.9984962406015038	0.8167281672816729	0.8985115020297699	0.981645139360979	0.01835486063902103	0.8952668680765358	0.9127310061601642	0.9039145907473309
341	1.0	0.0	1.0	1.0	1.0	0.8161764705882353	0.18382352941176472	0.9984962406015038	0.8167281672816729	0.8985115020297699	0.981645139360979	0.01835486063902103	0.8952668680765358	0.9127310061601642	0.9039145907473309
341	1.0	0.0	1.0	1.0	1.0	0.8161764705882353	0.18382352941176472	0.9984962406015038	0.8167281672816729	0.8985115020297699	0.981645139360979	0.01835486063902103	0.8952668680765358	0.9127310061601642	0.9039145907473309
341	1.0	0.0	1.0	1.0	1.0	0.8161764705882353	0.18382352941176472	0.9984962406015038	0.8167281672816729	0.8985115020297699	0.981645139360979	0.01835486063902103	0.8952668680765358	0.9127310061601642	0.9039145907473309
341	1.0	0.0	1.0	1.0	1.0	0.8161764705882353	0.18382352941176472	0.9984962406015038	0.8167281672816729	0.8985115020297699	0.981645139360979	0.01835486063902103	0.8952668680765358	0.9127310061601642	0.9039145907473309
341	1.0	0.0	1.0	1.0	1.0	0.8161764705882353	0.18382352941176472	0.9984962406015038	0.8167281672816729	0.8985115020297699	0.981645139360979	0.01835486063902103	0.8952668680765358	0.9127310061601642	0.9039145907473309
341	1.0	0.0	1.0	1.0	1.0	0.8161764705882353	0.18382352941176472	0.9984962406015038	0.8167281672816729	0.8985115020297699	0.981645139360979	0.01835486063902103	0.8952668680765358	0.9127310061601642	0.9039145907473309
341	1.0	0.0	1.0	1.0	1.0	0.8161764705882353	0.18382352941176472	0.9984962406015038	0.8167281672816729	0.8985115020297699	0.981645139360979	0.01835486063902103	0.8952668680765358	0.9127310061601642	0.9039145907473309
341	1.0	0.0	1.0	1.0	1.0	0.8161764705882353	0.18382352941176472	0.9984962406015038	0.8167281672816729	0.8985115020297699	0.981645139360979	0.01835486063902103	0.8952668680765358	0.9127310061601642	0.9039145907473309
341	1.0	0.0	1.0	1.0	1.0	0.8161764705882353	0.18382352941176472	0.9984962406015038	0.8167281672816729	0.8985115020297699	0.981645139360979	0.01835486063902103	0.8952668680765358	0.9127310061601642	0.9039145907473309
341	1.0	0.0	1.0	1.0	1.0	0.8161764705882353	0.18382352941176472	0.9984962406015038	0.8167281672816729	0.8985115020297699	0.981645139360979	0.01835486063902103	0.8952668680765358	0.9127310061601642	0.9039145907473309
341	1.0	0.0	1.0	1.0	1.0	0.8161764705882353	0.18382352941176472	0.9984962406015038	0.8167281672816729	0.8985115020297699	0.981645139360979	0.01835486063902103	0.8952668680765358	0.9127310061601642	0.9039145907473309
341	1.0	0.0	1.0	1.0	1.0	0.8161764705882353	0.18382352941176472	0.9984962406015038	0.8167281672816729	0.8985115020297699	0.981645139360979	0.01835486063902103	0.8952668680765358	0.9127310061601642	0.9039145907473309
341	1.0	0.0	1.0	1.0	1.0	0.8161764705882353	0.18382352941176472	0.9984962406015038	0.8167281672816729	0.8985115020297699	0.981645139360979	0.01835486063902103	0.8952668680765358	0.9127310061601642	0.9039145907473309
341	1.0	0.0	1.0	1.0	1.0	0.8161764705882353	0.18382352941176472	0.9984962406015038	0.8167281672816729	0.8985115020297699	0.981645139360979	0.01835486063902103	0.8952668680765358	0.9127310061601642	0.9039145907473309
341	1.0	0.0	1.0	1.0	1.0	0.8161764705882353	0.18382352941176472	0.9984962406015038	0.8167281672816729	0.8985115020297699	0.981645139360979	0.01835486063902103	0.8952668680765358	0.9127310061601642	0.9039145907473309
341	1.0	0.0	1.0	1.0	1.0	0.8161764705882353	0.18382352941176472	0.9984962406015038	0.8167281672816729	0.8985115020297699	0.981645139360979	0.01835486063902103	0.8952668680765358	0.9127310061601642	0.9039145907473309
