# Supplementary material for: An Improved Hybrid Feature Selection Algorithm for Electric Charge Recovery Risk
Source: Hindawi journal article supplement (doi:10.1155/2020/8479341), 2020-08-28
Supplement: f1 [file 8479341.f1.zip › 8479341.f1/Experimental Results/201808/BWOA_SBS_results.csv]

features_num	Accuracy_high	Loss_high	Precission_high	Recall_high	F1_high	Accuracy_med	Loss_med	Precission_med	Recall_med	F1_med	Accuracy_low	Loss_low	Precission_low	Recall_low	F1_low
341	1	0	1	1	1	0.817401961	0.182598039	0.998498498	0.81795818	0.899256254	0.981548024	0.018451976	0.89516129	0.911704312	0.90335707
341	1	0	1	1	1	0.817401961	0.182598039	0.998498498	0.81795818	0.899256254	0.981548024	0.018451976	0.89516129	0.911704312	0.90335707
341	1	0	1	1	1	0.817401961	0.182598039	0.998498498	0.81795818	0.899256254	0.981548024	0.018451976	0.89516129	0.911704312	0.90335707
341	1	0	1	1	1	0.817401961	0.182598039	0.998498498	0.81795818	0.899256254	0.981548024	0.018451976	0.89516129	0.911704312	0.90335707
341	1	0	1	1	1	0.817401961	0.182598039	0.998498498	0.81795818	0.899256254	0.981548024	0.018451976	0.89516129	0.911704312	0.90335707
341	1	0	1	1	1	0.817401961	0.182598039	0.998498498	0.81795818	0.899256254	0.981548024	0.018451976	0.89516129	0.911704312	0.90335707
341	1	0	1	1	1	0.817401961	0.182598039	0.998498498	0.81795818	0.899256254	0.981548024	0.018451976	0.89516129	0.911704312	0.90335707
341	1	0	1	1	1	0.817401961	0.182598039	0.998498498	0.81795818	0.899256254	0.981548024	0.018451976	0.89516129	0.911704312	0.90335707
341	1	0	1	1	1	0.817401961	0.182598039	0.998498498	0.81795818	0.899256254	0.981548024	0.018451976	0.89516129	0.911704312	0.90335707
341	1	0	1	1	1	0.817401961	0.182598039	0.998498498	0.81795818	0.899256254	0.981548024	0.018451976	0.89516129	0.911704312	0.90335707
340	1	0	1	1	1	0.817625459	0.182374541	0.99850075	0.818181818	0.899392302	0.981643357	0.018356643	0.89516129	0.912641316	0.903816794
340	1	0	1	1	1	0.817625459	0.182374541	0.99850075	0.818181818	0.899392302	0.981643357	0.018356643	0.89516129	0.912641316	0.903816794
340	1	0	1	1	1	0.817625459	0.182374541	0.99850075	0.818181818	0.899392302	0.981643357	0.018356643	0.89516129	0.912641316	0.903816794
340	1	0	1	1	1	0.817625459	0.182374541	0.99850075	0.818181818	0.899392302	0.981643357	0.018356643	0.89516129	0.912641316	0.903816794
340	1	0	1	1	1	0.817625459	0.182374541	0.99850075	0.818181818	0.899392302	0.981643357	0.018356643	0.89516129	0.912641316	0.903816794
340	1	0	1	1	1	0.817625459	0.182374541	0.99850075	0.818181818	0.899392302	0.981643357	0.018356643	0.89516129	0.912641316	0.903816794
340	1	0	1	1	1	0.817625459	0.182374541	0.99850075	0.818181818	0.899392302	0.981643357	0.018356643	0.89516129	0.912641316	0.903816794
340	1	0	1	1	1	0.817625459	0.182374541	0.99850075	0.818181818	0.899392302	0.981643357	0.018356643	0.89516129	0.912641316	0.903816794
340	1	0	1	1	1	0.817625459	0.182374541	0.99850075	0.818181818	0.899392302	0.981643357	0.018356643	0.89516129	0.912641316	0.903816794
340	1	0	1	1	1	0.817625459	0.182374541	0.99850075	0.818181818	0.899392302	0.981643357	0.018356643	0.89516129	0.912641316	0.903816794
340	1	0	1	1	1	0.817625459	0.182374541	0.99850075	0.818181818	0.899392302	0.981643357	0.018356643	0.89516129	0.912641316	0.903816794
340	1	0	1	1	1	0.817625459	0.182374541	0.99850075	0.818181818	0.899392302	0.981643357	0.018356643	0.89516129	0.912641316	0.903816794
340	1	0	1	1	1	0.817625459	0.182374541	0.99850075	0.818181818	0.899392302	0.981643357	0.018356643	0.89516129	0.912641316	0.903816794
339	1	0	1	1	1	0.817625459	0.182374541	0.99850075	0.818181818	0.899392302	0.981643357	0.018356643	0.89516129	0.912641316	0.903816794
339	1	0	1	1	1	0.817625459	0.182374541	0.99850075	0.818181818	0.899392302	0.981643357	0.018356643	0.89516129	0.912641316	0.903816794
339	1	0	1	1	1	0.817625459	0.182374541	0.99850075	0.818181818	0.899392302	0.981643357	0.018356643	0.89516129	0.912641316	0.903816794
339	1	0	1	1	1	0.817625459	0.182374541	0.99850075	0.818181818	0.899392302	0.981643357	0.018356643	0.89516129	0.912641316	0.903816794
339	1	0	1	1	1	0.817625459	0.182374541	0.99850075	0.818181818	0.899392302	0.981643357	0.018356643	0.89516129	0.912641316	0.903816794
339	1	0	1	1	1	0.817625459	0.182374541	0.99850075	0.818181818	0.899392302	0.981643357	0.018356643	0.89516129	0.912641316	0.903816794
339	1	0	1	1	1	0.817625459	0.182374541	0.99850075	0.818181818	0.899392302	0.981643357	0.018356643	0.89516129	0.912641316	0.903816794
339	1	0	1	1	1	0.817625459	0.182374541	0.99850075	0.818181818	0.899392302	0.981643357	0.018356643	0.89516129	0.912641316	0.903816794
339	1	0	1	1	1	0.817625459	0.182374541	0.99850075	0.818181818	0.899392302	0.981643357	0.018356643	0.89516129	0.912641316	0.903816794
339	1	0	1	1	1	0.817625459	0.182374541	0.99850075	0.818181818	0.899392302	0.981643357	0.018356643	0.89516129	0.912641316	0.903816794
339	1	0	1	1	1	0.817625459	0.182374541	0.99850075	0.818181818	0.899392302	0.981643357	0.018356643	0.89516129	0.912641316	0.903816794
339	1	0	1	1	1	0.817625459	0.182374541	0.99850075	0.818181818	0.899392302	0.981643357	0.018356643	0.89516129	0.912641316	0.903816794
339	1	0	1	1	1	0.817625459	0.182374541	0.99850075	0.818181818	0.899392302	0.981643357	0.018356643	0.89516129	0.912641316	0.903816794
339	1	0	1	1	1	0.817625459	0.182374541	0.99850075	0.818181818	0.899392302	0.981643357	0.018356643	0.89516129	0.912641316	0.903816794
339	1	0	1	1	1	0.817625459	0.182374541	0.99850075	0.818181818	0.899392302	0.981643357	0.018356643	0.89516129	0.912641316	0.903816794
339	1	0	1	1	1	0.817625459	0.182374541	0.99850075	0.818181818	0.899392302	0.981643357	0.018356643	0.89516129	0.912641316	0.903816794
339	1	0	1	1	1	0.817625459	0.182374541	0.99850075	0.818181818	0.899392302	0.981643357	0.018356643	0.89516129	0.912641316	0.903816794
339	1	0	1	1	1	0.817625459	0.182374541	0.99850075	0.818181818	0.899392302	0.981643357	0.018356643	0.89516129	0.912641316	0.903816794
339	1	0	1	1	1	0.817625459	0.182374541	0.99850075	0.818181818	0.899392302	0.981643357	0.018356643	0.89516129	0.912641316	0.903816794
339	1	0	1	1	1	0.817625459	0.182374541	0.99850075	0.818181818	0.899392302	0.981643357	0.018356643	0.89516129	0.912641316	0.903816794
339	1	0	1	1	1	0.817625459	0.182374541	0.99850075	0.818181818	0.899392302	0.981643357	0.018356643	0.89516129	0.912641316	0.903816794
339	1	0	1	1	1	0.817625459	0.182374541	0.99850075	0.818181818	0.899392302	0.981643357	0.018356643	0.89516129	0.912641316	0.903816794
339	1	0	1	1	1	0.817625459	0.182374541	0.99850075	0.818181818	0.899392302	0.981643357	0.018356643	0.89516129	0.912641316	0.903816794
339	1	0	1	1	1	0.817625459	0.182374541	0.99850075	0.818181818	0.899392302	0.981643357	0.018356643	0.89516129	0.912641316	0.903816794
339	1	0	1	1	1	0.817625459	0.182374541	0.99850075	0.818181818	0.899392302	0.981643357	0.018356643	0.89516129	0.912641316	0.903816794
339	1	0	1	1	1	0.817625459	0.182374541	0.99850075	0.818181818	0.899392302	0.981643357	0.018356643	0.89516129	0.912641316	0.903816794
339	1	0	1	1	1	0.817625459	0.182374541	0.99850075	0.818181818	0.899392302	0.981643357	0.018356643	0.89516129	0.912641316	0.903816794
339	1	0	1	1	1	0.817625459	0.182374541	0.99850075	0.818181818	0.899392302	0.981643357	0.018356643	0.89516129	0.912641316	0.903816794
339	1	0	1	1	1	0.817625459	0.182374541	0.99850075	0.818181818	0.899392302	0.981643357	0.018356643	0.89516129	0.912641316	0.903816794
339	1	0	1	1	1	0.817625459	0.182374541	0.99850075	0.818181818	0.899392302	0.981643357	0.018356643	0.89516129	0.912641316	0.903816794
339	1	0	1	1	1	0.817625459	0.182374541	0.99850075	0.818181818	0.899392302	0.981643357	0.018356643	0.89516129	0.912641316	0.903816794
339	1	0	1	1	1	0.817625459	0.182374541	0.99850075	0.818181818	0.899392302	0.981643357	0.018356643	0.89516129	0.912641316	0.903816794
339	1	0	1	1	1	0.817625459	0.182374541	0.99850075	0.818181818	0.899392302	0.981643357	0.018356643	0.89516129	0.912641316	0.903816794
339	1	0	1	1	1	0.817625459	0.182374541	0.99850075	0.818181818	0.899392302	0.981643357	0.018356643	0.89516129	0.912641316	0.903816794
339	1	0	1	1	1	0.817625459	0.182374541	0.99850075	0.818181818	0.899392302	0.981643357	0.018356643	0.89516129	0.912641316	0.903816794
339	1	0	1	1	1	0.817625459	0.182374541	0.99850075	0.818181818	0.899392302	0.981643357	0.018356643	0.89516129	0.912641316	0.903816794
339	1	0	1	1	1	0.817625459	0.182374541	0.99850075	0.818181818	0.899392302	0.981643357	0.018356643	0.89516129	0.912641316	0.903816794
339	1	0	1	1	1	0.817625459	0.182374541	0.99850075	0.818181818	0.899392302	0.981643357	0.018356643	0.89516129	0.912641316	0.903816794
339	1	0	1	1	1	0.817625459	0.182374541	0.99850075	0.818181818	0.899392302	0.981643357	0.018356643	0.89516129	0.912641316	0.903816794
339	1	0	1	1	1	0.817625459	0.182374541	0.99850075	0.818181818	0.899392302	0.981643357	0.018356643	0.89516129	0.912641316	0.903816794
339	1	0	1	1	1	0.817625459	0.182374541	0.99850075	0.818181818	0.899392302	0.981643357	0.018356643	0.89516129	0.912641316	0.903816794
339	1	0	1	1	1	0.817625459	0.182374541	0.99850075	0.818181818	0.899392302	0.981643357	0.018356643	0.89516129	0.912641316	0.903816794
339	1	0	1	1	1	0.817625459	0.182374541	0.99850075	0.818181818	0.899392302	0.981643357	0.018356643	0.89516129	0.912641316	0.903816794
339	1	0	1	1	1	0.817625459	0.182374541	0.99850075	0.818181818	0.899392302	0.981643357	0.018356643	0.89516129	0.912641316	0.903816794
339	1	0	1	1	1	0.817625459	0.182374541	0.99850075	0.818181818	0.899392302	0.981643357	0.018356643	0.89516129	0.912641316	0.903816794
339	1	0	1	1	1	0.817625459	0.182374541	0.99850075	0.818181818	0.899392302	0.981643357	0.018356643	0.89516129	0.912641316	0.903816794
339	1	0	1	1	1	0.817625459	0.182374541	0.99850075	0.818181818	0.899392302	0.981643357	0.018356643	0.89516129	0.912641316	0.903816794
339	1	0	1	1	1	0.817625459	0.182374541	0.99850075	0.818181818	0.899392302	0.981643357	0.018356643	0.89516129	0.912641316	0.903816794
339	1	0	1	1	1	0.817625459	0.182374541	0.99850075	0.818181818	0.899392302	0.981643357	0.018356643	0.89516129	0.912641316	0.903816794
339	1	0	1	1	1	0.817625459	0.182374541	0.99850075	0.818181818	0.899392302	0.981643357	0.018356643	0.89516129	0.912641316	0.903816794
339	1	0	1	1	1	0.817625459	0.182374541	0.99850075	0.818181818	0.899392302	0.981643357	0.018356643	0.89516129	0.912641316	0.903816794
339	1	0	1	1	1	0.817625459	0.182374541	0.99850075	0.818181818	0.899392302	0.981643357	0.018356643	0.89516129	0.912641316	0.903816794
338	1	0	1	1	1	0.817625459	0.182374541	0.99850075	0.818181818	0.899392302	0.981643357	0.018356643	0.89516129	0.912641316	0.903816794
338	1	0	1	1	1	0.817625459	0.182374541	0.99850075	0.818181818	0.899392302	0.981643357	0.018356643	0.89516129	0.912641316	0.903816794
338	1	0	1	1	1	0.817625459	0.182374541	0.99850075	0.818181818	0.899392302	0.981643357	0.018356643	0.89516129	0.912641316	0.903816794
338	1	0	1	1	1	0.817625459	0.182374541	0.99850075	0.818181818	0.899392302	0.981643357	0.018356643	0.89516129	0.912641316	0.903816794
338	1	0	1	1	1	0.817625459	0.182374541	0.99850075	0.818181818	0.899392302	0.981643357	0.018356643	0.89516129	0.912641316	0.903816794
338	1	0	1	1	1	0.817625459	0.182374541	0.99850075	0.818181818	0.899392302	0.981643357	0.018356643	0.89516129	0.912641316	0.903816794
338	1	0	1	1	1	0.817625459	0.182374541	0.99850075	0.818181818	0.899392302	0.981643357	0.018356643	0.89516129	0.912641316	0.903816794
338	1	0	1	1	1	0.817625459	0.182374541	0.99850075	0.818181818	0.899392302	0.981643357	0.018356643	0.89516129	0.912641316	0.903816794
338	1	0	1	1	1	0.817625459	0.182374541	0.99850075	0.818181818	0.899392302	0.981643357	0.018356643	0.89516129	0.912641316	0.903816794
338	1	0	1	1	1	0.817625459	0.182374541	0.99850075	0.818181818	0.899392302	0.981643357	0.018356643	0.89516129	0.912641316	0.903816794
338	1	0	1	1	1	0.817625459	0.182374541	0.99850075	0.818181818	0.899392302	0.981643357	0.018356643	0.89516129	0.912641316	0.903816794
338	1	0	1	1	1	0.817625459	0.182374541	0.99850075	0.818181818	0.899392302	0.981643357	0.018356643	0.89516129	0.912641316	0.903816794
338	1	0	1	1	1	0.817625459	0.182374541	0.99850075	0.818181818	0.899392302	0.981643357	0.018356643	0.89516129	0.912641316	0.903816794
338	1	0	1	1	1	0.817625459	0.182374541	0.99850075	0.818181818	0.899392302	0.981643357	0.018356643	0.89516129	0.912641316	0.903816794
338	1	0	1	1	1	0.817625459	0.182374541	0.99850075	0.818181818	0.899392302	0.981643357	0.018356643	0.89516129	0.912641316	0.903816794
338	1	0	1	1	1	0.817625459	0.182374541	0.99850075	0.818181818	0.899392302	0.981643357	0.018356643	0.89516129	0.912641316	0.903816794
338	1	0	1	1	1	0.817625459	0.182374541	0.99850075	0.818181818	0.899392302	0.981643357	0.018356643	0.89516129	0.912641316	0.903816794
338	1	0	1	1	1	0.817625459	0.182374541	0.99850075	0.818181818	0.899392302	0.981643357	0.018356643	0.89516129	0.912641316	0.903816794
338	1	0	1	1	1	0.817625459	0.182374541	0.99850075	0.818181818	0.899392302	0.981643357	0.018356643	0.89516129	0.912641316	0.903816794
338	1	0	1	1	1	0.817625459	0.182374541	0.99850075	0.818181818	0.899392302	0.981643357	0.018356643	0.89516129	0.912641316	0.903816794
338	1	0	1	1	1	0.817625459	0.182374541	0.99850075	0.818181818	0.899392302	0.981643357	0.018356643	0.89516129	0.912641316	0.903816794
338	1	0	1	1	1	0.817625459	0.182374541	0.99850075	0.818181818	0.899392302	0.981643357	0.018356643	0.89516129	0.912641316	0.903816794
338	1	0	1	1	1	0.817625459	0.182374541	0.99850075	0.818181818	0.899392302	0.981643357	0.018356643	0.89516129	0.912641316	0.903816794
338	1	0	1	1	1	0.817625459	0.182374541	0.99850075	0.818181818	0.899392302	0.981643357	0.018356643	0.89516129	0.912641316	0.903816794
338	1	0	1	1	1	0.817625459	0.182374541	0.99850075	0.818181818	0.899392302	0.981643357	0.018356643	0.89516129	0.912641316	0.903816794
338	1	0	1	1	1	0.817625459	0.182374541	0.99850075	0.818181818	0.899392302	0.981643357	0.018356643	0.89516129	0.912641316	0.903816794
338	1	0	1	1	1	0.817625459	0.182374541	0.99850075	0.818181818	0.899392302	0.981643357	0.018356643	0.89516129	0.912641316	0.903816794
338	1	0	1	1	1	0.817625459	0.182374541	0.99850075	0.818181818	0.899392302	0.981643357	0.018356643	0.89516129	0.912641316	0.903816794
338	1	0	1	1	1	0.817625459	0.182374541	0.99850075	0.818181818	0.899392302	0.981643357	0.018356643	0.89516129	0.912641316	0.903816794
337	1	0	1	1	1	0.817625459	0.182374541	0.99850075	0.818181818	0.899392302	0.981643357	0.018356643	0.89516129	0.912641316	0.903816794
337	1	0	1	1	1	0.817625459	0.182374541	0.99850075	0.818181818	0.899392302	0.981643357	0.018356643	0.89516129	0.912641316	0.903816794
337	1	0	1	1	1	0.817625459	0.182374541	0.99850075	0.818181818	0.899392302	0.981643357	0.018356643	0.89516129	0.912641316	0.903816794
337	1	0	1	1	1	0.817625459	0.182374541	0.99850075	0.818181818	0.899392302	0.981643357	0.018356643	0.89516129	0.912641316	0.903816794
337	1	0	1	1	1	0.817625459	0.182374541	0.99850075	0.818181818	0.899392302	0.981643357	0.018356643	0.89516129	0.912641316	0.903816794
337	1	0	1	1	1	0.817625459	0.182374541	0.99850075	0.818181818	0.899392302	0.981643357	0.018356643	0.89516129	0.912641316	0.903816794
337	1	0	1	1	1	0.817625459	0.182374541	0.99850075	0.818181818	0.899392302	0.981643357	0.018356643	0.89516129	0.912641316	0.903816794
337	1	0	1	1	1	0.817625459	0.182374541	0.99850075	0.818181818	0.899392302	0.981643357	0.018356643	0.89516129	0.912641316	0.903816794
337	1	0	1	1	1	0.817625459	0.182374541	0.99850075	0.818181818	0.899392302	0.981643357	0.018356643	0.89516129	0.912641316	0.903816794
337	1	0	1	1	1	0.817625459	0.182374541	0.99850075	0.818181818	0.899392302	0.981643357	0.018356643	0.89516129	0.912641316	0.903816794
337	1	0	1	1	1	0.817625459	0.182374541	0.99850075	0.818181818	0.899392302	0.981643357	0.018356643	0.89516129	0.912641316	0.903816794
337	1	0	1	1	1	0.817625459	0.182374541	0.99850075	0.818181818	0.899392302	0.981643357	0.018356643	0.89516129	0.912641316	0.903816794
337	1	0	1	1	1	0.817625459	0.182374541	0.99850075	0.818181818	0.899392302	0.981643357	0.018356643	0.89516129	0.912641316	0.903816794
337	1	0	1	1	1	0.817625459	0.182374541	0.99850075	0.818181818	0.899392302	0.981643357	0.018356643	0.89516129	0.912641316	0.903816794
337	1	0	1	1	1	0.817625459	0.182374541	0.99850075	0.818181818	0.899392302	0.981643357	0.018356643	0.89516129	0.912641316	0.903816794
337	1	0	1	1	1	0.817625459	0.182374541	0.99850075	0.818181818	0.899392302	0.981643357	0.018356643	0.89516129	0.912641316	0.903816794
337	1	0	1	1	1	0.817625459	0.182374541	0.99850075	0.818181818	0.899392302	0.981643357	0.018356643	0.89516129	0.912641316	0.903816794
337	1	0	1	1	1	0.817625459	0.182374541	0.99850075	0.818181818	0.899392302	0.981643357	0.018356643	0.89516129	0.912641316	0.903816794
337	1	0	1	1	1	0.817625459	0.182374541	0.99850075	0.818181818	0.899392302	0.981643357	0.018356643	0.89516129	0.912641316	0.903816794
337	1	0	1	1	1	0.817625459	0.182374541	0.99850075	0.818181818	0.899392302	0.981643357	0.018356643	0.89516129	0.912641316	0.903816794
337	1	0	1	1	1	0.817625459	0.182374541	0.99850075	0.818181818	0.899392302	0.981643357	0.018356643	0.89516129	0.912641316	0.903816794
337	1	0	1	1	1	0.817625459	0.182374541	0.99850075	0.818181818	0.899392302	0.981643357	0.018356643	0.89516129	0.912641316	0.903816794
337	1	0	1	1	1	0.817625459	0.182374541	0.99850075	0.818181818	0.899392302	0.981643357	0.018356643	0.89516129	0.912641316	0.903816794
337	1	0	1	1	1	0.817625459	0.182374541	0.99850075	0.818181818	0.899392302	0.981643357	0.018356643	0.89516129	0.912641316	0.903816794
337	1	0	1	1	1	0.817625459	0.182374541	0.99850075	0.818181818	0.899392302	0.981643357	0.018356643	0.89516129	0.912641316	0.903816794
337	1	0	1	1	1	0.817625459	0.182374541	0.99850075	0.818181818	0.899392302	0.981643357	0.018356643	0.89516129	0.912641316	0.903816794
337	1	0	1	1	1	0.817625459	0.182374541	0.99850075	0.818181818	0.899392302	0.981643357	0.018356643	0.89516129	0.912641316	0.903816794
337	1	0	1	1	1	0.817625459	0.182374541	0.99850075	0.818181818	0.899392302	0.981643357	0.018356643	0.89516129	0.912641316	0.903816794
337	1	0	1	1	1	0.817625459	0.182374541	0.99850075	0.818181818	0.899392302	0.981643357	0.018356643	0.89516129	0.912641316	0.903816794
337	1	0	1	1	1	0.817625459	0.182374541	0.99850075	0.818181818	0.899392302	0.981643357	0.018356643	0.89516129	0.912641316	0.903816794
337	1	0	1	1	1	0.817625459	0.182374541	0.99850075	0.818181818	0.899392302	0.981643357	0.018356643	0.89516129	0.912641316	0.903816794
337	1	0	1	1	1	0.817625459	0.182374541	0.99850075	0.818181818	0.899392302	0.981643357	0.018356643	0.89516129	0.912641316	0.903816794
337	1	0	1	1	1	0.817625459	0.182374541	0.99850075	0.818181818	0.899392302	0.981643357	0.018356643	0.89516129	0.912641316	0.903816794
337	1	0	1	1	1	0.817625459	0.182374541	0.99850075	0.818181818	0.899392302	0.981643357	0.018356643	0.89516129	0.912641316	0.903816794
337	1	0	1	1	1	0.817625459	0.182374541	0.99850075	0.818181818	0.899392302	0.981643357	0.018356643	0.89516129	0.912641316	0.903816794
337	1	0	1	1	1	0.817625459	0.182374541	0.99850075	0.818181818	0.899392302	0.981643357	0.018356643	0.89516129	0.912641316	0.903816794
337	1	0	1	1	1	0.817625459	0.182374541	0.99850075	0.818181818	0.899392302	0.981643357	0.018356643	0.89516129	0.912641316	0.903816794
337	1	0	1	1	1	0.817625459	0.182374541	0.99850075	0.818181818	0.899392302	0.981643357	0.018356643	0.89516129	0.912641316	0.903816794
337	1	0	1	1	1	0.817625459	0.182374541	0.99850075	0.818181818	0.899392302	0.981643357	0.018356643	0.89516129	0.912641316	0.903816794
337	1	0	1	1	1	0.817625459	0.182374541	0.99850075	0.818181818	0.899392302	0.981643357	0.018356643	0.89516129	0.912641316	0.903816794
337	1	0	1	1	1	0.817625459	0.182374541	0.99850075	0.818181818	0.899392302	0.981643357	0.018356643	0.89516129	0.912641316	0.903816794
337	1	0	1	1	1	0.817625459	0.182374541	0.99850075	0.818181818	0.899392302	0.981643357	0.018356643	0.89516129	0.912641316	0.903816794
337	1	0	1	1	1	0.817625459	0.182374541	0.99850075	0.818181818	0.899392302	0.981643357	0.018356643	0.89516129	0.912641316	0.903816794
337	1	0	1	1	1	0.817625459	0.182374541	0.99850075	0.818181818	0.899392302	0.981643357	0.018356643	0.89516129	0.912641316	0.903816794
337	1	0	1	1	1	0.817625459	0.182374541	0.99850075	0.818181818	0.899392302	0.981643357	0.018356643	0.89516129	0.912641316	0.903816794
337	1	0	1	1	1	0.817625459	0.182374541	0.99850075	0.818181818	0.899392302	0.981643357	0.018356643	0.89516129	0.912641316	0.903816794
337	1	0	1	1	1	0.817625459	0.182374541	0.99850075	0.818181818	0.899392302	0.981643357	0.018356643	0.89516129	0.912641316	0.903816794
337	1	0	1	1	1	0.817625459	0.182374541	0.99850075	0.818181818	0.899392302	0.981643357	0.018356643	0.89516129	0.912641316	0.903816794
337	1	0	1	1	1	0.817625459	0.182374541	0.99850075	0.818181818	0.899392302	0.981643357	0.018356643	0.89516129	0.912641316	0.903816794
337	1	0	1	1	1	0.817625459	0.182374541	0.99850075	0.818181818	0.899392302	0.981643357	0.018356643	0.89516129	0.912641316	0.903816794
337	1	0	1	1	1	0.817625459	0.182374541	0.99850075	0.818181818	0.899392302	0.981643357	0.018356643	0.89516129	0.912641316	0.903816794
337	1	0	1	1	1	0.817625459	0.182374541	0.99850075	0.818181818	0.899392302	0.981643357	0.018356643	0.89516129	0.912641316	0.903816794
337	1	0	1	1	1	0.817625459	0.182374541	0.99850075	0.818181818	0.899392302	0.981643357	0.018356643	0.89516129	0.912641316	0.903816794
337	1	0	1	1	1	0.817625459	0.182374541	0.99850075	0.818181818	0.899392302	0.981643357	0.018356643	0.89516129	0.912641316	0.903816794
337	1	0	1	1	1	0.817625459	0.182374541	0.99850075	0.818181818	0.899392302	0.981643357	0.018356643	0.89516129	0.912641316	0.903816794
336	1	0	1	1	1	0.818404908	0.181595092	0.998498498	0.818965517	0.899864682	0.981549815	0.018450185	0.894472362	0.912820513	0.903553299
336	1	0	1	1	1	0.818404908	0.181595092	0.998498498	0.818965517	0.899864682	0.981549815	0.018450185	0.894472362	0.912820513	0.903553299
336	1	0	1	1	1	0.818404908	0.181595092	0.998498498	0.818965517	0.899864682	0.981549815	0.018450185	0.894472362	0.912820513	0.903553299
336	1	0	1	1	1	0.818404908	0.181595092	0.998498498	0.818965517	0.899864682	0.981549815	0.018450185	0.894472362	0.912820513	0.903553299
336	1	0	1	1	1	0.818404908	0.181595092	0.998498498	0.818965517	0.899864682	0.981549815	0.018450185	0.894472362	0.912820513	0.903553299
336	1	0	1	1	1	0.818404908	0.181595092	0.998498498	0.818965517	0.899864682	0.981549815	0.018450185	0.894472362	0.912820513	0.903553299
336	1	0	1	1	1	0.818404908	0.181595092	0.998498498	0.818965517	0.899864682	0.981549815	0.018450185	0.894472362	0.912820513	0.903553299
336	1	0	1	1	1	0.818404908	0.181595092	0.998498498	0.818965517	0.899864682	0.981549815	0.018450185	0.894472362	0.912820513	0.903553299
336	1	0	1	1	1	0.818404908	0.181595092	0.998498498	0.818965517	0.899864682	0.981549815	0.018450185	0.894472362	0.912820513	0.903553299
336	1	0	1	1	1	0.818404908	0.181595092	0.998498498	0.818965517	0.899864682	0.981549815	0.018450185	0.894472362	0.912820513	0.903553299
336	1	0	1	1	1	0.818404908	0.181595092	0.998498498	0.818965517	0.899864682	0.981549815	0.018450185	0.894472362	0.912820513	0.903553299
336	1	0	1	1	1	0.818404908	0.181595092	0.998498498	0.818965517	0.899864682	0.981549815	0.018450185	0.894472362	0.912820513	0.903553299
336	1	0	1	1	1	0.818404908	0.181595092	0.998498498	0.818965517	0.899864682	0.981549815	0.018450185	0.894472362	0.912820513	0.903553299
336	1	0	1	1	1	0.818404908	0.181595092	0.998498498	0.818965517	0.899864682	0.981549815	0.018450185	0.894472362	0.912820513	0.903553299
336	1	0	1	1	1	0.818404908	0.181595092	0.998498498	0.818965517	0.899864682	0.981549815	0.018450185	0.894472362	0.912820513	0.903553299
336	1	0	1	1	1	0.818404908	0.181595092	0.998498498	0.818965517	0.899864682	0.981549815	0.018450185	0.894472362	0.912820513	0.903553299
336	1	0	1	1	1	0.818404908	0.181595092	0.998498498	0.818965517	0.899864682	0.981549815	0.018450185	0.894472362	0.912820513	0.903553299
336	1	0	1	1	1	0.818404908	0.181595092	0.998498498	0.818965517	0.899864682	0.981549815	0.018450185	0.894472362	0.912820513	0.903553299
336	1	0	1	1	1	0.818404908	0.181595092	0.998498498	0.818965517	0.899864682	0.981549815	0.018450185	0.894472362	0.912820513	0.903553299
336	1	0	1	1	1	0.818404908	0.181595092	0.998498498	0.818965517	0.899864682	0.981549815	0.018450185	0.894472362	0.912820513	0.903553299
336	1	0	1	1	1	0.818404908	0.181595092	0.998498498	0.818965517	0.899864682	0.981549815	0.018450185	0.894472362	0.912820513	0.903553299
336	1	0	1	1	1	0.818404908	0.181595092	0.998498498	0.818965517	0.899864682	0.981549815	0.018450185	0.894472362	0.912820513	0.903553299
336	1	0	1	1	1	0.818404908	0.181595092	0.998498498	0.818965517	0.899864682	0.981549815	0.018450185	0.894472362	0.912820513	0.903553299
336	1	0	1	1	1	0.818404908	0.181595092	0.998498498	0.818965517	0.899864682	0.981549815	0.018450185	0.894472362	0.912820513	0.903553299
336	1	0	1	1	1	0.818404908	0.181595092	0.998498498	0.818965517	0.899864682	0.981549815	0.018450185	0.894472362	0.912820513	0.903553299
336	1	0	1	1	1	0.818404908	0.181595092	0.998498498	0.818965517	0.899864682	0.981549815	0.018450185	0.894472362	0.912820513	0.903553299
336	1	0	1	1	1	0.818404908	0.181595092	0.998498498	0.818965517	0.899864682	0.981549815	0.018450185	0.894472362	0.912820513	0.903553299
336	1	0	1	1	1	0.818404908	0.181595092	0.998498498	0.818965517	0.899864682	0.981549815	0.018450185	0.894472362	0.912820513	0.903553299
336	1	0	1	1	1	0.818404908	0.181595092	0.998498498	0.818965517	0.899864682	0.981549815	0.018450185	0.894472362	0.912820513	0.903553299
336	1	0	1	1	1	0.818404908	0.181595092	0.998498498	0.818965517	0.899864682	0.981549815	0.018450185	0.894472362	0.912820513	0.903553299
336	1	0	1	1	1	0.818404908	0.181595092	0.998498498	0.818965517	0.899864682	0.981549815	0.018450185	0.894472362	0.912820513	0.903553299
336	1	0	1	1	1	0.818404908	0.181595092	0.998498498	0.818965517	0.899864682	0.981549815	0.018450185	0.894472362	0.912820513	0.903553299
336	1	0	1	1	1	0.818404908	0.181595092	0.998498498	0.818965517	0.899864682	0.981549815	0.018450185	0.894472362	0.912820513	0.903553299
336	1	0	1	1	1	0.818404908	0.181595092	0.998498498	0.818965517	0.899864682	0.981549815	0.018450185	0.894472362	0.912820513	0.903553299
336	1	0	1	1	1	0.818404908	0.181595092	0.998498498	0.818965517	0.899864682	0.981549815	0.018450185	0.894472362	0.912820513	0.903553299
336	1	0	1	1	1	0.818404908	0.181595092	0.998498498	0.818965517	0.899864682	0.981549815	0.018450185	0.894472362	0.912820513	0.903553299
336	1	0	1	1	1	0.818404908	0.181595092	0.998498498	0.818965517	0.899864682	0.981549815	0.018450185	0.894472362	0.912820513	0.903553299
336	1	0	1	1	1	0.818404908	0.181595092	0.998498498	0.818965517	0.899864682	0.981549815	0.018450185	0.894472362	0.912820513	0.903553299
336	1	0	1	1	1	0.818404908	0.181595092	0.998498498	0.818965517	0.899864682	0.981549815	0.018450185	0.894472362	0.912820513	0.903553299
336	1	0	1	1	1	0.818404908	0.181595092	0.998498498	0.818965517	0.899864682	0.981549815	0.018450185	0.894472362	0.912820513	0.903553299
336	1	0	1	1	1	0.818404908	0.181595092	0.998498498	0.818965517	0.899864682	0.981549815	0.018450185	0.894472362	0.912820513	0.903553299
336	1	0	1	1	1	0.818404908	0.181595092	0.998498498	0.818965517	0.899864682	0.981549815	0.018450185	0.894472362	0.912820513	0.903553299
336	1	0	1	1	1	0.818404908	0.181595092	0.998498498	0.818965517	0.899864682	0.981549815	0.018450185	0.894472362	0.912820513	0.903553299
336	1	0	1	1	1	0.818404908	0.181595092	0.998498498	0.818965517	0.899864682	0.981549815	0.018450185	0.894472362	0.912820513	0.903553299
336	1	0	1	1	1	0.818404908	0.181595092	0.998498498	0.818965517	0.899864682	0.981549815	0.018450185	0.894472362	0.912820513	0.903553299
336	1	0	1	1	1	0.818404908	0.181595092	0.998498498	0.818965517	0.899864682	0.981549815	0.018450185	0.894472362	0.912820513	0.903553299
336	1	0	1	1	1	0.818404908	0.181595092	0.998498498	0.818965517	0.899864682	0.981549815	0.018450185	0.894472362	0.912820513	0.903553299
336	1	0	1	1	1	0.818404908	0.181595092	0.998498498	0.818965517	0.899864682	0.981549815	0.018450185	0.894472362	0.912820513	0.903553299
336	1	0	1	1	1	0.818404908	0.181595092	0.998498498	0.818965517	0.899864682	0.981549815	0.018450185	0.894472362	0.912820513	0.903553299
336	1	0	1	1	1	0.818404908	0.181595092	0.998498498	0.818965517	0.899864682	0.981549815	0.018450185	0.894472362	0.912820513	0.903553299
336	1	0	1	1	1	0.818404908	0.181595092	0.998498498	0.818965517	0.899864682	0.981549815	0.018450185	0.894472362	0.912820513	0.903553299
336	1	0	1	1	1	0.818404908	0.181595092	0.998498498	0.818965517	0.899864682	0.981549815	0.018450185	0.894472362	0.912820513	0.903553299
336	1	0	1	1	1	0.818404908	0.181595092	0.998498498	0.818965517	0.899864682	0.981549815	0.018450185	0.894472362	0.912820513	0.903553299
336	1	0	1	1	1	0.818404908	0.181595092	0.998498498	0.818965517	0.899864682	0.981549815	0.018450185	0.894472362	0.912820513	0.903553299
336	1	0	1	1	1	0.818404908	0.181595092	0.998498498	0.818965517	0.899864682	0.981549815	0.018450185	0.894472362	0.912820513	0.903553299
336	1	0	1	1	1	0.818404908	0.181595092	0.998498498	0.818965517	0.899864682	0.981549815	0.018450185	0.894472362	0.912820513	0.903553299
336	1	0	1	1	1	0.818404908	0.181595092	0.998498498	0.818965517	0.899864682	0.981549815	0.018450185	0.894472362	0.912820513	0.903553299
336	1	0	1	1	1	0.818404908	0.181595092	0.998498498	0.818965517	0.899864682	0.981549815	0.018450185	0.894472362	0.912820513	0.903553299
336	1	0	1	1	1	0.818404908	0.181595092	0.998498498	0.818965517	0.899864682	0.981549815	0.018450185	0.894472362	0.912820513	0.903553299
336	1	0	1	1	1	0.818404908	0.181595092	0.998498498	0.818965517	0.899864682	0.981549815	0.018450185	0.894472362	0.912820513	0.903553299
336	1	0	1	1	1	0.818404908	0.181595092	0.998498498	0.818965517	0.899864682	0.981549815	0.018450185	0.894472362	0.912820513	0.903553299
336	1	0	1	1	1	0.818404908	0.181595092	0.998498498	0.818965517	0.899864682	0.981549815	0.018450185	0.894472362	0.912820513	0.903553299
336	1	0	1	1	1	0.818404908	0.181595092	0.998498498	0.818965517	0.899864682	0.981549815	0.018450185	0.894472362	0.912820513	0.903553299
336	1	0	1	1	1	0.818404908	0.181595092	0.998498498	0.818965517	0.899864682	0.981549815	0.018450185	0.894472362	0.912820513	0.903553299
336	1	0	1	1	1	0.818404908	0.181595092	0.998498498	0.818965517	0.899864682	0.981549815	0.018450185	0.894472362	0.912820513	0.903553299
336	1	0	1	1	1	0.818404908	0.181595092	0.998498498	0.818965517	0.899864682	0.981549815	0.018450185	0.894472362	0.912820513	0.903553299
336	1	0	1	1	1	0.818404908	0.181595092	0.998498498	0.818965517	0.899864682	0.981549815	0.018450185	0.894472362	0.912820513	0.903553299
336	1	0	1	1	1	0.818404908	0.181595092	0.998498498	0.818965517	0.899864682	0.981549815	0.018450185	0.894472362	0.912820513	0.903553299
336	1	0	1	1	1	0.818404908	0.181595092	0.998498498	0.818965517	0.899864682	0.981549815	0.018450185	0.894472362	0.912820513	0.903553299
336	1	0	1	1	1	0.818404908	0.181595092	0.998498498	0.818965517	0.899864682	0.981549815	0.018450185	0.894472362	0.912820513	0.903553299
336	1	0	1	1	1	0.818404908	0.181595092	0.998498498	0.818965517	0.899864682	0.981549815	0.018450185	0.894472362	0.912820513	0.903553299
336	1	0	1	1	1	0.818404908	0.181595092	0.998498498	0.818965517	0.899864682	0.981549815	0.018450185	0.894472362	0.912820513	0.903553299
336	1	0	1	1	1	0.818404908	0.181595092	0.998498498	0.818965517	0.899864682	0.981549815	0.018450185	0.894472362	0.912820513	0.903553299
336	1	0	1	1	1	0.818404908	0.181595092	0.998498498	0.818965517	0.899864682	0.981549815	0.018450185	0.894472362	0.912820513	0.903553299
336	1	0	1	1	1	0.818404908	0.181595092	0.998498498	0.818965517	0.899864682	0.981549815	0.018450185	0.894472362	0.912820513	0.903553299
336	1	0	1	1	1	0.818404908	0.181595092	0.998498498	0.818965517	0.899864682	0.981549815	0.018450185	0.894472362	0.912820513	0.903553299
336	1	0	1	1	1	0.818404908	0.181595092	0.998498498	0.818965517	0.899864682	0.981549815	0.018450185	0.894472362	0.912820513	0.903553299
335	1	0	1	1	1	0.817617866	0.182382134	0.998482549	0.81840796	0.899521531	0.982245076	0.017754924	0.893700787	0.92370295	0.908454227
334	1	0	1	1	1	0.835858586	0.164141414	0.998489426	0.836708861	0.91046832	0.982364341	0.017635659	0.89668616	0.923694779	0.909990109
334	1	0	1	1	1	0.835858586	0.164141414	0.998489426	0.836708861	0.91046832	0.982364341	0.017635659	0.89668616	0.923694779	0.909990109
334	1	0	1	1	1	0.835858586	0.164141414	0.998489426	0.836708861	0.91046832	0.982364341	0.017635659	0.89668616	0.923694779	0.909990109
333	1	0	1	1	1	0.836708861	0.163291139	0.998487141	0.837563452	0.910973085	0.9826584	0.0173416	0.900293255	0.922845691	0.911429985
333	1	0	1	1	1	0.836708861	0.163291139	0.998487141	0.837563452	0.910973085	0.9826584	0.0173416	0.900293255	0.922845691	0.911429985
333	1	0	1	1	1	0.836708861	0.163291139	0.998487141	0.837563452	0.910973085	0.9826584	0.0173416	0.900293255	0.922845691	0.911429985
333	1	0	1	1	1	0.836708861	0.163291139	0.998487141	0.837563452	0.910973085	0.9826584	0.0173416	0.900293255	0.922845691	0.911429985
333	1	0	1	1	1	0.836708861	0.163291139	0.998487141	0.837563452	0.910973085	0.9826584	0.0173416	0.900293255	0.922845691	0.911429985
333	1	0	1	1	1	0.836708861	0.163291139	0.998487141	0.837563452	0.910973085	0.9826584	0.0173416	0.900293255	0.922845691	0.911429985
333	1	0	1	1	1	0.836708861	0.163291139	0.998487141	0.837563452	0.910973085	0.9826584	0.0173416	0.900293255	0.922845691	0.911429985
333	1	0	1	1	1	0.836708861	0.163291139	0.998487141	0.837563452	0.910973085	0.9826584	0.0173416	0.900293255	0.922845691	0.911429985
333	1	0	1	1	1	0.836708861	0.163291139	0.998487141	0.837563452	0.910973085	0.9826584	0.0173416	0.900293255	0.922845691	0.911429985
333	1	0	1	1	1	0.836708861	0.163291139	0.998487141	0.837563452	0.910973085	0.9826584	0.0173416	0.900293255	0.922845691	0.911429985
333	1	0	1	1	1	0.836708861	0.163291139	0.998487141	0.837563452	0.910973085	0.9826584	0.0173416	0.900293255	0.922845691	0.911429985
332	1	0	1	1	1	0.839443742	0.160556258	0.998493976	0.840304183	0.912594632	0.982753609	0.017246391	0.899512195	0.924774323	0.911968348
332	1	0	1	1	1	0.839443742	0.160556258	0.998493976	0.840304183	0.912594632	0.982753609	0.017246391	0.899512195	0.924774323	0.911968348
332	1	0	1	1	1	0.839443742	0.160556258	0.998493976	0.840304183	0.912594632	0.982753609	0.017246391	0.899512195	0.924774323	0.911968348
332	1	0	1	1	1	0.839443742	0.160556258	0.998493976	0.840304183	0.912594632	0.982753609	0.017246391	0.899512195	0.924774323	0.911968348
332	1	0	1	1	1	0.839443742	0.160556258	0.998493976	0.840304183	0.912594632	0.982753609	0.017246391	0.899512195	0.924774323	0.911968348
332	1	0	1	1	1	0.839443742	0.160556258	0.998493976	0.840304183	0.912594632	0.982753609	0.017246391	0.899512195	0.924774323	0.911968348
332	1	0	1	1	1	0.839443742	0.160556258	0.998493976	0.840304183	0.912594632	0.982753609	0.017246391	0.899512195	0.924774323	0.911968348
332	1	0	1	1	1	0.839443742	0.160556258	0.998493976	0.840304183	0.912594632	0.982753609	0.017246391	0.899512195	0.924774323	0.911968348
332	1	0	1	1	1	0.839443742	0.160556258	0.998493976	0.840304183	0.912594632	0.982753609	0.017246391	0.899512195	0.924774323	0.911968348
332	1	0	1	1	1	0.839443742	0.160556258	0.998493976	0.840304183	0.912594632	0.982753609	0.017246391	0.899512195	0.924774323	0.911968348
332	1	0	1	1	1	0.839443742	0.160556258	0.998493976	0.840304183	0.912594632	0.982753609	0.017246391	0.899512195	0.924774323	0.911968348
332	1	0	1	1	1	0.839443742	0.160556258	0.998493976	0.840304183	0.912594632	0.982753609	0.017246391	0.899512195	0.924774323	0.911968348
332	1	0	1	1	1	0.839443742	0.160556258	0.998493976	0.840304183	0.912594632	0.982753609	0.017246391	0.899512195	0.924774323	0.911968348
332	1	0	1	1	1	0.839443742	0.160556258	0.998493976	0.840304183	0.912594632	0.982753609	0.017246391	0.899512195	0.924774323	0.911968348
332	1	0	1	1	1	0.839443742	0.160556258	0.998493976	0.840304183	0.912594632	0.982753609	0.017246391	0.899512195	0.924774323	0.911968348
332	1	0	1	1	1	0.839443742	0.160556258	0.998493976	0.840304183	0.912594632	0.982753609	0.017246391	0.899512195	0.924774323	0.911968348
332	1	0	1	1	1	0.839443742	0.160556258	0.998493976	0.840304183	0.912594632	0.982753609	0.017246391	0.899512195	0.924774323	0.911968348
332	1	0	1	1	1	0.839443742	0.160556258	0.998493976	0.840304183	0.912594632	0.982753609	0.017246391	0.899512195	0.924774323	0.911968348
332	1	0	1	1	1	0.839443742	0.160556258	0.998493976	0.840304183	0.912594632	0.982753609	0.017246391	0.899512195	0.924774323	0.911968348
332	1	0	1	1	1	0.839443742	0.160556258	0.998493976	0.840304183	0.912594632	0.982753609	0.017246391	0.899512195	0.924774323	0.911968348
332	1	0	1	1	1	0.839443742	0.160556258	0.998493976	0.840304183	0.912594632	0.982753609	0.017246391	0.899512195	0.924774323	0.911968348
332	1	0	1	1	1	0.839443742	0.160556258	0.998493976	0.840304183	0.912594632	0.982753609	0.017246391	0.899512195	0.924774323	0.911968348
332	1	0	1	1	1	0.839443742	0.160556258	0.998493976	0.840304183	0.912594632	0.982753609	0.017246391	0.899512195	0.924774323	0.911968348
332	1	0	1	1	1	0.839443742	0.160556258	0.998493976	0.840304183	0.912594632	0.982753609	0.017246391	0.899512195	0.924774323	0.911968348
332	1	0	1	1	1	0.839443742	0.160556258	0.998493976	0.840304183	0.912594632	0.982753609	0.017246391	0.899512195	0.924774323	0.911968348
332	1	0	1	1	1	0.839443742	0.160556258	0.998493976	0.840304183	0.912594632	0.982753609	0.017246391	0.899512195	0.924774323	0.911968348
332	1	0	1	1	1	0.839443742	0.160556258	0.998493976	0.840304183	0.912594632	0.982753609	0.017246391	0.899512195	0.924774323	0.911968348
332	1	0	1	1	1	0.839443742	0.160556258	0.998493976	0.840304183	0.912594632	0.982753609	0.017246391	0.899512195	0.924774323	0.911968348
332	1	0	1	1	1	0.839443742	0.160556258	0.998493976	0.840304183	0.912594632	0.982753609	0.017246391	0.899512195	0.924774323	0.911968348
331	1	0	1	1	1	0.863157895	0.136842105	1	0.862796834	0.926345609	0.980968022	0.019031978	0.892992424	0.918208374	0.905424868
330	1	0	1	1	1	0.863157895	0.136842105	1	0.862796834	0.926345609	0.980968022	0.019031978	0.892992424	0.918208374	0.905424868
330	1	0	1	1	1	0.863157895	0.136842105	1	0.862796834	0.926345609	0.980968022	0.019031978	0.892992424	0.918208374	0.905424868
330	1	0	1	1	1	0.863157895	0.136842105	1	0.862796834	0.926345609	0.980968022	0.019031978	0.892992424	0.918208374	0.905424868
330	1	0	1	1	1	0.863157895	0.136842105	1	0.862796834	0.926345609	0.980968022	0.019031978	0.892992424	0.918208374	0.905424868
330	1	0	1	1	1	0.863157895	0.136842105	1	0.862796834	0.926345609	0.980968022	0.019031978	0.892992424	0.918208374	0.905424868
330	1	0	1	1	1	0.863157895	0.136842105	1	0.862796834	0.926345609	0.980968022	0.019031978	0.892992424	0.918208374	0.905424868
330	1	0	1	1	1	0.863157895	0.136842105	1	0.862796834	0.926345609	0.980968022	0.019031978	0.892992424	0.918208374	0.905424868
330	1	0	1	1	1	0.863157895	0.136842105	1	0.862796834	0.926345609	0.980968022	0.019031978	0.892992424	0.918208374	0.905424868
330	1	0	1	1	1	0.863157895	0.136842105	1	0.862796834	0.926345609	0.980968022	0.019031978	0.892992424	0.918208374	0.905424868
329	1	0	1	1	1	0.863157895	0.136842105	1	0.862796834	0.926345609	0.981064631	0.018935369	0.893838863	0.918208374	0.90585975
329	1	0	1	1	1	0.863157895	0.136842105	1	0.862796834	0.926345609	0.981064631	0.018935369	0.893838863	0.918208374	0.90585975
329	1	0	1	1	1	0.863157895	0.136842105	1	0.862796834	0.926345609	0.981064631	0.018935369	0.893838863	0.918208374	0.90585975
328	1	0	1	1	1	0.862977602	0.137022398	1	0.862615588	0.926241135	0.98116306	0.01883694	0.89478673	0.918287938	0.906385022
328	1	0	1	1	1	0.862977602	0.137022398	1	0.862615588	0.926241135	0.98116306	0.01883694	0.89478673	0.918287938	0.906385022
328	1	0	1	1	1	0.862977602	0.137022398	1	0.862615588	0.926241135	0.98116306	0.01883694	0.89478673	0.918287938	0.906385022
328	1	0	1	1	1	0.862977602	0.137022398	1	0.862615588	0.926241135	0.98116306	0.01883694	0.89478673	0.918287938	0.906385022
328	1	0	1	1	1	0.862977602	0.137022398	1	0.862615588	0.926241135	0.98116306	0.01883694	0.89478673	0.918287938	0.906385022
328	1	0	1	1	1	0.862977602	0.137022398	1	0.862615588	0.926241135	0.98116306	0.01883694	0.89478673	0.918287938	0.906385022
328	1	0	1	1	1	0.862977602	0.137022398	1	0.862615588	0.926241135	0.98116306	0.01883694	0.89478673	0.918287938	0.906385022
328	1	0	1	1	1	0.862977602	0.137022398	1	0.862615588	0.926241135	0.98116306	0.01883694	0.89478673	0.918287938	0.906385022
328	1	0	1	1	1	0.862977602	0.137022398	1	0.862615588	0.926241135	0.98116306	0.01883694	0.89478673	0.918287938	0.906385022
328	1	0	1	1	1	0.862977602	0.137022398	1	0.862615588	0.926241135	0.98116306	0.01883694	0.89478673	0.918287938	0.906385022
328	1	0	1	1	1	0.862977602	0.137022398	1	0.862615588	0.926241135	0.98116306	0.01883694	0.89478673	0.918287938	0.906385022
328	1	0	1	1	1	0.862977602	0.137022398	1	0.862615588	0.926241135	0.98116306	0.01883694	0.89478673	0.918287938	0.906385022
328	1	0	1	1	1	0.862977602	0.137022398	1	0.862615588	0.926241135	0.98116306	0.01883694	0.89478673	0.918287938	0.906385022
328	1	0	1	1	1	0.862977602	0.137022398	1	0.862615588	0.926241135	0.98116306	0.01883694	0.89478673	0.918287938	0.906385022
328	1	0	1	1	1	0.862977602	0.137022398	1	0.862615588	0.926241135	0.98116306	0.01883694	0.89478673	0.918287938	0.906385022
328	1	0	1	1	1	0.862977602	0.137022398	1	0.862615588	0.926241135	0.98116306	0.01883694	0.89478673	0.918287938	0.906385022
328	1	0	1	1	1	0.862977602	0.137022398	1	0.862615588	0.926241135	0.98116306	0.01883694	0.89478673	0.918287938	0.906385022
328	1	0	1	1	1	0.862977602	0.137022398	1	0.862615588	0.926241135	0.98116306	0.01883694	0.89478673	0.918287938	0.906385022
328	1	0	1	1	1	0.862977602	0.137022398	1	0.862615588	0.926241135	0.98116306	0.01883694	0.89478673	0.918287938	0.906385022
328	1	0	1	1	1	0.862977602	0.137022398	1	0.862615588	0.926241135	0.98116306	0.01883694	0.89478673	0.918287938	0.906385022
328	1	0	1	1	1	0.862977602	0.137022398	1	0.862615588	0.926241135	0.98116306	0.01883694	0.89478673	0.918287938	0.906385022
328	1	0	1	1	1	0.862977602	0.137022398	1	0.862615588	0.926241135	0.98116306	0.01883694	0.89478673	0.918287938	0.906385022
328	1	0	1	1	1	0.862977602	0.137022398	1	0.862615588	0.926241135	0.98116306	0.01883694	0.89478673	0.918287938	0.906385022
328	1	0	1	1	1	0.862977602	0.137022398	1	0.862615588	0.926241135	0.98116306	0.01883694	0.89478673	0.918287938	0.906385022
328	1	0	1	1	1	0.862977602	0.137022398	1	0.862615588	0.926241135	0.98116306	0.01883694	0.89478673	0.918287938	0.906385022
328	1	0	1	1	1	0.862977602	0.137022398	1	0.862615588	0.926241135	0.98116306	0.01883694	0.89478673	0.918287938	0.906385022
328	1	0	1	1	1	0.862977602	0.137022398	1	0.862615588	0.926241135	0.98116306	0.01883694	0.89478673	0.918287938	0.906385022
328	1	0	1	1	1	0.862977602	0.137022398	1	0.862615588	0.926241135	0.98116306	0.01883694	0.89478673	0.918287938	0.906385022
328	1	0	1	1	1	0.862977602	0.137022398	1	0.862615588	0.926241135	0.98116306	0.01883694	0.89478673	0.918287938	0.906385022
328	1	0	1	1	1	0.862977602	0.137022398	1	0.862615588	0.926241135	0.98116306	0.01883694	0.89478673	0.918287938	0.906385022
328	1	0	1	1	1	0.862977602	0.137022398	1	0.862615588	0.926241135	0.98116306	0.01883694	0.89478673	0.918287938	0.906385022
328	1	0	1	1	1	0.862977602	0.137022398	1	0.862615588	0.926241135	0.98116306	0.01883694	0.89478673	0.918287938	0.906385022
328	1	0	1	1	1	0.862977602	0.137022398	1	0.862615588	0.926241135	0.98116306	0.01883694	0.89478673	0.918287938	0.906385022
328	1	0	1	1	1	0.862977602	0.137022398	1	0.862615588	0.926241135	0.98116306	0.01883694	0.89478673	0.918287938	0.906385022
328	1	0	1	1	1	0.862977602	0.137022398	1	0.862615588	0.926241135	0.98116306	0.01883694	0.89478673	0.918287938	0.906385022
328	1	0	1	1	1	0.862977602	0.137022398	1	0.862615588	0.926241135	0.98116306	0.01883694	0.89478673	0.918287938	0.906385022
328	1	0	1	1	1	0.862977602	0.137022398	1	0.862615588	0.926241135	0.98116306	0.01883694	0.89478673	0.918287938	0.906385022
328	1	0	1	1	1	0.862977602	0.137022398	1	0.862615588	0.926241135	0.98116306	0.01883694	0.89478673	0.918287938	0.906385022
328	1	0	1	1	1	0.862977602	0.137022398	1	0.862615588	0.926241135	0.98116306	0.01883694	0.89478673	0.918287938	0.906385022
328	1	0	1	1	1	0.862977602	0.137022398	1	0.862615588	0.926241135	0.98116306	0.01883694	0.89478673	0.918287938	0.906385022
328	1	0	1	1	1	0.862977602	0.137022398	1	0.862615588	0.926241135	0.98116306	0.01883694	0.89478673	0.918287938	0.906385022
328	1	0	1	1	1	0.862977602	0.137022398	1	0.862615588	0.926241135	0.98116306	0.01883694	0.89478673	0.918287938	0.906385022
328	1	0	1	1	1	0.862977602	0.137022398	1	0.862615588	0.926241135	0.98116306	0.01883694	0.89478673	0.918287938	0.906385022
328	1	0	1	1	1	0.862977602	0.137022398	1	0.862615588	0.926241135	0.98116306	0.01883694	0.89478673	0.918287938	0.906385022
328	1	0	1	1	1	0.862977602	0.137022398	1	0.862615588	0.926241135	0.98116306	0.01883694	0.89478673	0.918287938	0.906385022
328	1	0	1	1	1	0.862977602	0.137022398	1	0.862615588	0.926241135	0.98116306	0.01883694	0.89478673	0.918287938	0.906385022
328	1	0	1	1	1	0.862977602	0.137022398	1	0.862615588	0.926241135	0.98116306	0.01883694	0.89478673	0.918287938	0.906385022
328	1	0	1	1	1	0.862977602	0.137022398	1	0.862615588	0.926241135	0.98116306	0.01883694	0.89478673	0.918287938	0.906385022
328	1	0	1	1	1	0.862977602	0.137022398	1	0.862615588	0.926241135	0.98116306	0.01883694	0.89478673	0.918287938	0.906385022
328	1	0	1	1	1	0.862977602	0.137022398	1	0.862615588	0.926241135	0.98116306	0.01883694	0.89478673	0.918287938	0.906385022
328	1	0	1	1	1	0.862977602	0.137022398	1	0.862615588	0.926241135	0.98116306	0.01883694	0.89478673	0.918287938	0.906385022
328	1	0	1	1	1	0.862977602	0.137022398	1	0.862615588	0.926241135	0.98116306	0.01883694	0.89478673	0.918287938	0.906385022
328	1	0	1	1	1	0.862977602	0.137022398	1	0.862615588	0.926241135	0.98116306	0.01883694	0.89478673	0.918287938	0.906385022
328	1	0	1	1	1	0.862977602	0.137022398	1	0.862615588	0.926241135	0.98116306	0.01883694	0.89478673	0.918287938	0.906385022
328	1	0	1	1	1	0.862977602	0.137022398	1	0.862615588	0.926241135	0.98116306	0.01883694	0.89478673	0.918287938	0.906385022
328	1	0	1	1	1	0.862977602	0.137022398	1	0.862615588	0.926241135	0.98116306	0.01883694	0.89478673	0.918287938	0.906385022
328	1	0	1	1	1	0.862977602	0.137022398	1	0.862615588	0.926241135	0.98116306	0.01883694	0.89478673	0.918287938	0.906385022
328	1	0	1	1	1	0.862977602	0.137022398	1	0.862615588	0.926241135	0.98116306	0.01883694	0.89478673	0.918287938	0.906385022
328	1	0	1	1	1	0.862977602	0.137022398	1	0.862615588	0.926241135	0.98116306	0.01883694	0.89478673	0.918287938	0.906385022
328	1	0	1	1	1	0.862977602	0.137022398	1	0.862615588	0.926241135	0.98116306	0.01883694	0.89478673	0.918287938	0.906385022
328	1	0	1	1	1	0.862977602	0.137022398	1	0.862615588	0.926241135	0.98116306	0.01883694	0.89478673	0.918287938	0.906385022
328	1	0	1	1	1	0.862977602	0.137022398	1	0.862615588	0.926241135	0.98116306	0.01883694	0.89478673	0.918287938	0.906385022
328	1	0	1	1	1	0.862977602	0.137022398	1	0.862615588	0.926241135	0.98116306	0.01883694	0.89478673	0.918287938	0.906385022
328	1	0	1	1	1	0.862977602	0.137022398	1	0.862615588	0.926241135	0.98116306	0.01883694	0.89478673	0.918287938	0.906385022
328	1	0	1	1	1	0.862977602	0.137022398	1	0.862615588	0.926241135	0.98116306	0.01883694	0.89478673	0.918287938	0.906385022
328	1	0	1	1	1	0.862977602	0.137022398	1	0.862615588	0.926241135	0.98116306	0.01883694	0.89478673	0.918287938	0.906385022
328	1	0	1	1	1	0.862977602	0.137022398	1	0.862615588	0.926241135	0.98116306	0.01883694	0.89478673	0.918287938	0.906385022
328	1	0	1	1	1	0.862977602	0.137022398	1	0.862615588	0.926241135	0.98116306	0.01883694	0.89478673	0.918287938	0.906385022
328	1	0	1	1	1	0.862977602	0.137022398	1	0.862615588	0.926241135	0.98116306	0.01883694	0.89478673	0.918287938	0.906385022
328	1	0	1	1	1	0.862977602	0.137022398	1	0.862615588	0.926241135	0.98116306	0.01883694	0.89478673	0.918287938	0.906385022
328	1	0	1	1	1	0.862977602	0.137022398	1	0.862615588	0.926241135	0.98116306	0.01883694	0.89478673	0.918287938	0.906385022
328	1	0	1	1	1	0.862977602	0.137022398	1	0.862615588	0.926241135	0.98116306	0.01883694	0.89478673	0.918287938	0.906385022
328	1	0	1	1	1	0.862977602	0.137022398	1	0.862615588	0.926241135	0.98116306	0.01883694	0.89478673	0.918287938	0.906385022
328	1	0	1	1	1	0.862977602	0.137022398	1	0.862615588	0.926241135	0.98116306	0.01883694	0.89478673	0.918287938	0.906385022
328	1	0	1	1	1	0.862977602	0.137022398	1	0.862615588	0.926241135	0.98116306	0.01883694	0.89478673	0.918287938	0.906385022
328	1	0	1	1	1	0.862977602	0.137022398	1	0.862615588	0.926241135	0.98116306	0.01883694	0.89478673	0.918287938	0.906385022
328	1	0	1	1	1	0.862977602	0.137022398	1	0.862615588	0.926241135	0.98116306	0.01883694	0.89478673	0.918287938	0.906385022
328	1	0	1	1	1	0.862977602	0.137022398	1	0.862615588	0.926241135	0.98116306	0.01883694	0.89478673	0.918287938	0.906385022
328	1	0	1	1	1	0.862977602	0.137022398	1	0.862615588	0.926241135	0.98116306	0.01883694	0.89478673	0.918287938	0.906385022
328	1	0	1	1	1	0.862977602	0.137022398	1	0.862615588	0.926241135	0.98116306	0.01883694	0.89478673	0.918287938	0.906385022
328	1	0	1	1	1	0.862977602	0.137022398	1	0.862615588	0.926241135	0.98116306	0.01883694	0.89478673	0.918287938	0.906385022
328	1	0	1	1	1	0.862977602	0.137022398	1	0.862615588	0.926241135	0.98116306	0.01883694	0.89478673	0.918287938	0.906385022
328	1	0	1	1	1	0.862977602	0.137022398	1	0.862615588	0.926241135	0.98116306	0.01883694	0.89478673	0.918287938	0.906385022
328	1	0	1	1	1	0.862977602	0.137022398	1	0.862615588	0.926241135	0.98116306	0.01883694	0.89478673	0.918287938	0.906385022
328	1	0	1	1	1	0.862977602	0.137022398	1	0.862615588	0.926241135	0.98116306	0.01883694	0.89478673	0.918287938	0.906385022
328	1	0	1	1	1	0.862977602	0.137022398	1	0.862615588	0.926241135	0.98116306	0.01883694	0.89478673	0.918287938	0.906385022
328	1	0	1	1	1	0.862977602	0.137022398	1	0.862615588	0.926241135	0.98116306	0.01883694	0.89478673	0.918287938	0.906385022
328	1	0	1	1	1	0.862977602	0.137022398	1	0.862615588	0.926241135	0.98116306	0.01883694	0.89478673	0.918287938	0.906385022
328	1	0	1	1	1	0.862977602	0.137022398	1	0.862615588	0.926241135	0.98116306	0.01883694	0.89478673	0.918287938	0.906385022
328	1	0	1	1	1	0.862977602	0.137022398	1	0.862615588	0.926241135	0.98116306	0.01883694	0.89478673	0.918287938	0.906385022
328	1	0	1	1	1	0.862977602	0.137022398	1	0.862615588	0.926241135	0.98116306	0.01883694	0.89478673	0.918287938	0.906385022
328	1	0	1	1	1	0.862977602	0.137022398	1	0.862615588	0.926241135	0.98116306	0.01883694	0.89478673	0.918287938	0.906385022
328	1	0	1	1	1	0.862977602	0.137022398	1	0.862615588	0.926241135	0.98116306	0.01883694	0.89478673	0.918287938	0.906385022
328	1	0	1	1	1	0.862977602	0.137022398	1	0.862615588	0.926241135	0.98116306	0.01883694	0.89478673	0.918287938	0.906385022
328	1	0	1	1	1	0.862977602	0.137022398	1	0.862615588	0.926241135	0.98116306	0.01883694	0.89478673	0.918287938	0.906385022
328	1	0	1	1	1	0.862977602	0.137022398	1	0.862615588	0.926241135	0.98116306	0.01883694	0.89478673	0.918287938	0.906385022
328	1	0	1	1	1	0.862977602	0.137022398	1	0.862615588	0.926241135	0.98116306	0.01883694	0.89478673	0.918287938	0.906385022
328	1	0	1	1	1	0.862977602	0.137022398	1	0.862615588	0.926241135	0.98116306	0.01883694	0.89478673	0.918287938	0.906385022
328	1	0	1	1	1	0.862977602	0.137022398	1	0.862615588	0.926241135	0.98116306	0.01883694	0.89478673	0.918287938	0.906385022
328	1	0	1	1	1	0.862977602	0.137022398	1	0.862615588	0.926241135	0.98116306	0.01883694	0.89478673	0.918287938	0.906385022
328	1	0	1	1	1	0.862977602	0.137022398	1	0.862615588	0.926241135	0.98116306	0.01883694	0.89478673	0.918287938	0.906385022
328	1	0	1	1	1	0.862977602	0.137022398	1	0.862615588	0.926241135	0.98116306	0.01883694	0.89478673	0.918287938	0.906385022
328	1	0	1	1	1	0.862977602	0.137022398	1	0.862615588	0.926241135	0.98116306	0.01883694	0.89478673	0.918287938	0.906385022
328	1	0	1	1	1	0.862977602	0.137022398	1	0.862615588	0.926241135	0.98116306	0.01883694	0.89478673	0.918287938	0.906385022
328	1	0	1	1	1	0.862977602	0.137022398	1	0.862615588	0.926241135	0.98116306	0.01883694	0.89478673	0.918287938	0.906385022
328	1	0	1	1	1	0.862977602	0.137022398	1	0.862615588	0.926241135	0.98116306	0.01883694	0.89478673	0.918287938	0.906385022
328	1	0	1	1	1	0.862977602	0.137022398	1	0.862615588	0.926241135	0.98116306	0.01883694	0.89478673	0.918287938	0.906385022
328	1	0	1	1	1	0.862977602	0.137022398	1	0.862615588	0.926241135	0.98116306	0.01883694	0.89478673	0.918287938	0.906385022
328	1	0	1	1	1	0.862977602	0.137022398	1	0.862615588	0.926241135	0.98116306	0.01883694	0.89478673	0.918287938	0.906385022
328	1	0	1	1	1	0.862977602	0.137022398	1	0.862615588	0.926241135	0.98116306	0.01883694	0.89478673	0.918287938	0.906385022
328	1	0	1	1	1	0.862977602	0.137022398	1	0.862615588	0.926241135	0.98116306	0.01883694	0.89478673	0.918287938	0.906385022
328	1	0	1	1	1	0.862977602	0.137022398	1	0.862615588	0.926241135	0.98116306	0.01883694	0.89478673	0.918287938	0.906385022
328	1	0	1	1	1	0.862977602	0.137022398	1	0.862615588	0.926241135	0.98116306	0.01883694	0.89478673	0.918287938	0.906385022
328	1	0	1	1	1	0.862977602	0.137022398	1	0.862615588	0.926241135	0.98116306	0.01883694	0.89478673	0.918287938	0.906385022
328	1	0	1	1	1	0.862977602	0.137022398	1	0.862615588	0.926241135	0.98116306	0.01883694	0.89478673	0.918287938	0.906385022
328	1	0	1	1	1	0.862977602	0.137022398	1	0.862615588	0.926241135	0.98116306	0.01883694	0.89478673	0.918287938	0.906385022
328	1	0	1	1	1	0.862977602	0.137022398	1	0.862615588	0.926241135	0.98116306	0.01883694	0.89478673	0.918287938	0.906385022
328	1	0	1	1	1	0.862977602	0.137022398	1	0.862615588	0.926241135	0.98116306	0.01883694	0.89478673	0.918287938	0.906385022
328	1	0	1	1	1	0.862977602	0.137022398	1	0.862615588	0.926241135	0.98116306	0.01883694	0.89478673	0.918287938	0.906385022
328	1	0	1	1	1	0.862977602	0.137022398	1	0.862615588	0.926241135	0.98116306	0.01883694	0.89478673	0.918287938	0.906385022
328	1	0	1	1	1	0.862977602	0.137022398	1	0.862615588	0.926241135	0.98116306	0.01883694	0.89478673	0.918287938	0.906385022
328	1	0	1	1	1	0.862977602	0.137022398	1	0.862615588	0.926241135	0.98116306	0.01883694	0.89478673	0.918287938	0.906385022
328	1	0	1	1	1	0.862977602	0.137022398	1	0.862615588	0.926241135	0.98116306	0.01883694	0.89478673	0.918287938	0.906385022
328	1	0	1	1	1	0.862977602	0.137022398	1	0.862615588	0.926241135	0.98116306	0.01883694	0.89478673	0.918287938	0.906385022
328	1	0	1	1	1	0.862977602	0.137022398	1	0.862615588	0.926241135	0.98116306	0.01883694	0.89478673	0.918287938	0.906385022
328	1	0	1	1	1	0.862977602	0.137022398	1	0.862615588	0.926241135	0.98116306	0.01883694	0.89478673	0.918287938	0.906385022
328	1	0	1	1	1	0.862977602	0.137022398	1	0.862615588	0.926241135	0.98116306	0.01883694	0.89478673	0.918287938	0.906385022
328	1	0	1	1	1	0.862977602	0.137022398	1	0.862615588	0.926241135	0.98116306	0.01883694	0.89478673	0.918287938	0.906385022
328	1	0	1	1	1	0.862977602	0.137022398	1	0.862615588	0.926241135	0.98116306	0.01883694	0.89478673	0.918287938	0.906385022
328	1	0	1	1	1	0.862977602	0.137022398	1	0.862615588	0.926241135	0.98116306	0.01883694	0.89478673	0.918287938	0.906385022
328	1	0	1	1	1	0.862977602	0.137022398	1	0.862615588	0.926241135	0.98116306	0.01883694	0.89478673	0.918287938	0.906385022
328	1	0	1	1	1	0.862977602	0.137022398	1	0.862615588	0.926241135	0.98116306	0.01883694	0.89478673	0.918287938	0.906385022
328	1	0	1	1	1	0.862977602	0.137022398	1	0.862615588	0.926241135	0.98116306	0.01883694	0.89478673	0.918287938	0.906385022
328	1	0	1	1	1	0.862977602	0.137022398	1	0.862615588	0.926241135	0.98116306	0.01883694	0.89478673	0.918287938	0.906385022
328	1	0	1	1	1	0.862977602	0.137022398	1	0.862615588	0.926241135	0.98116306	0.01883694	0.89478673	0.918287938	0.906385022
328	1	0	1	1	1	0.862977602	0.137022398	1	0.862615588	0.926241135	0.98116306	0.01883694	0.89478673	0.918287938	0.906385022
328	1	0	1	1	1	0.862977602	0.137022398	1	0.862615588	0.926241135	0.98116306	0.01883694	0.89478673	0.918287938	0.906385022
