# Supplementary material for: An Improved Hybrid Feature Selection Algorithm for Electric Charge Recovery Risk
Source: Hindawi journal article supplement (doi:10.1155/2020/8479341), 2020-08-28
Supplement: f1 [file 8479341.f1.zip › 8479341.f1/Experimental Results/201808/CBPSO_results.csv]

features_num	Accuracy_high	Loss_high	Precission_high	Recall_high	F1_high	Accuracy_med	Loss_med	Precission_med	Recall_med	F1_med	Accuracy_low	Loss_low	Precission_low	Recall_low	F1_low
383	1.0	0.0	1.0	1.0	1.0	0.8691099476439791	0.13089005235602091	0.9879807692307693	0.8772678762006404	0.9293386093838327	0.9328365623447591	0.06716343765524091	0.5315666406858924	0.9009247027741083	0.6686274509803922
383	1.0	0.0	1.0	1.0	1.0	0.8691099476439791	0.13089005235602091	0.9879807692307693	0.8772678762006404	0.9293386093838327	0.9328365623447591	0.06716343765524091	0.5315666406858924	0.9009247027741083	0.6686274509803922
383	1.0	0.0	1.0	1.0	1.0	0.8691099476439791	0.13089005235602091	0.9879807692307693	0.8772678762006404	0.9293386093838327	0.9328365623447591	0.06716343765524091	0.5315666406858924	0.9009247027741083	0.6686274509803922
383	1.0	0.0	1.0	1.0	1.0	0.8691099476439791	0.13089005235602091	0.9879807692307693	0.8772678762006404	0.9293386093838327	0.9328365623447591	0.06716343765524091	0.5315666406858924	0.9009247027741083	0.6686274509803922
383	1.0	0.0	1.0	1.0	1.0	0.8691099476439791	0.13089005235602091	0.9879807692307693	0.8772678762006404	0.9293386093838327	0.9328365623447591	0.06716343765524091	0.5315666406858924	0.9009247027741083	0.6686274509803922
383	1.0	0.0	1.0	1.0	1.0	0.8691099476439791	0.13089005235602091	0.9879807692307693	0.8772678762006404	0.9293386093838327	0.9328365623447591	0.06716343765524091	0.5315666406858924	0.9009247027741083	0.6686274509803922
383	1.0	0.0	1.0	1.0	1.0	0.8691099476439791	0.13089005235602091	0.9879807692307693	0.8772678762006404	0.9293386093838327	0.9328365623447591	0.06716343765524091	0.5315666406858924	0.9009247027741083	0.6686274509803922
349	1.0	0.0	1.0	1.0	1.0	0.8768656716417911	0.12313432835820892	0.9829059829059829	0.888030888030888	0.9330628803245435	0.9429376883445125	0.057062311655487474	0.733955659276546	0.6366396761133604	0.6818428184281844
349	1.0	0.0	1.0	1.0	1.0	0.8768656716417911	0.12313432835820892	0.9829059829059829	0.888030888030888	0.9330628803245435	0.9429376883445125	0.057062311655487474	0.733955659276546	0.6366396761133604	0.6818428184281844
349	1.0	0.0	1.0	1.0	1.0	0.8768656716417911	0.12313432835820892	0.9829059829059829	0.888030888030888	0.9330628803245435	0.9429376883445125	0.057062311655487474	0.733955659276546	0.6366396761133604	0.6818428184281844
349	1.0	0.0	1.0	1.0	1.0	0.8826135105204873	0.11738648947951269	0.9924146649810367	0.8870056497175142	0.9367541766109786	0.9485962831158561	0.05140371688414391	0.645748987854251	0.7896039603960396	0.7104677060133632
349	1.0	0.0	1.0	1.0	1.0	0.8826135105204873	0.11738648947951269	0.9924146649810367	0.8870056497175142	0.9367541766109786	0.9485962831158561	0.05140371688414391	0.645748987854251	0.7896039603960396	0.7104677060133632
349	1.0	0.0	1.0	1.0	1.0	0.8826135105204873	0.11738648947951269	0.9924146649810367	0.8870056497175142	0.9367541766109786	0.9485962831158561	0.05140371688414391	0.645748987854251	0.7896039603960396	0.7104677060133632
349	1.0	0.0	1.0	1.0	1.0	0.8826135105204873	0.11738648947951269	0.9924146649810367	0.8870056497175142	0.9367541766109786	0.9485962831158561	0.05140371688414391	0.645748987854251	0.7896039603960396	0.7104677060133632
382	1.0	0.0	1.0	1.0	1.0	0.8647990255785627	0.1352009744214373	0.9943741209563994	0.8685503685503686	0.9272131147540984	0.9646715328467154	0.03532846715328464	0.8177920685959271	0.7981171548117155	0.8078348332451033
382	1.0	0.0	1.0	1.0	1.0	0.8647990255785627	0.1352009744214373	0.9943741209563994	0.8685503685503686	0.9272131147540984	0.9646715328467154	0.03532846715328464	0.8177920685959271	0.7981171548117155	0.8078348332451033
382	1.0	0.0	1.0	1.0	1.0	0.8647990255785627	0.1352009744214373	0.9943741209563994	0.8685503685503686	0.9272131147540984	0.9646715328467154	0.03532846715328464	0.8177920685959271	0.7981171548117155	0.8078348332451033
382	1.0	0.0	1.0	1.0	1.0	0.8647990255785627	0.1352009744214373	0.9943741209563994	0.8685503685503686	0.9272131147540984	0.9646715328467154	0.03532846715328464	0.8177920685959271	0.7981171548117155	0.8078348332451033
382	1.0	0.0	1.0	1.0	1.0	0.8647990255785627	0.1352009744214373	0.9943741209563994	0.8685503685503686	0.9272131147540984	0.9646715328467154	0.03532846715328464	0.8177920685959271	0.7981171548117155	0.8078348332451033
382	1.0	0.0	1.0	1.0	1.0	0.8647990255785627	0.1352009744214373	0.9943741209563994	0.8685503685503686	0.9272131147540984	0.9646715328467154	0.03532846715328464	0.8177920685959271	0.7981171548117155	0.8078348332451033
382	1.0	0.0	1.0	1.0	1.0	0.8647990255785627	0.1352009744214373	0.9943741209563994	0.8685503685503686	0.9272131147540984	0.9646715328467154	0.03532846715328464	0.8177920685959271	0.7981171548117155	0.8078348332451033
382	1.0	0.0	1.0	1.0	1.0	0.8647990255785627	0.1352009744214373	0.9943741209563994	0.8685503685503686	0.9272131147540984	0.9646715328467154	0.03532846715328464	0.8177920685959271	0.7981171548117155	0.8078348332451033
382	1.0	0.0	1.0	1.0	1.0	0.8647990255785627	0.1352009744214373	0.9943741209563994	0.8685503685503686	0.9272131147540984	0.9646715328467154	0.03532846715328464	0.8177920685959271	0.7981171548117155	0.8078348332451033
382	1.0	0.0	1.0	1.0	1.0	0.8647990255785627	0.1352009744214373	0.9943741209563994	0.8685503685503686	0.9272131147540984	0.9646715328467154	0.03532846715328464	0.8177920685959271	0.7981171548117155	0.8078348332451033
382	1.0	0.0	1.0	1.0	1.0	0.8647990255785627	0.1352009744214373	0.9943741209563994	0.8685503685503686	0.9272131147540984	0.9646715328467154	0.03532846715328464	0.8177920685959271	0.7981171548117155	0.8078348332451033
382	1.0	0.0	1.0	1.0	1.0	0.8647990255785627	0.1352009744214373	0.9943741209563994	0.8685503685503686	0.9272131147540984	0.9646715328467154	0.03532846715328464	0.8177920685959271	0.7981171548117155	0.8078348332451033
382	1.0	0.0	1.0	1.0	1.0	0.8647990255785627	0.1352009744214373	0.9943741209563994	0.8685503685503686	0.9272131147540984	0.9646715328467154	0.03532846715328464	0.8177920685959271	0.7981171548117155	0.8078348332451033
382	1.0	0.0	1.0	1.0	1.0	0.8647990255785627	0.1352009744214373	0.9943741209563994	0.8685503685503686	0.9272131147540984	0.9646715328467154	0.03532846715328464	0.8177920685959271	0.7981171548117155	0.8078348332451033
382	1.0	0.0	1.0	1.0	1.0	0.8647990255785627	0.1352009744214373	0.9943741209563994	0.8685503685503686	0.9272131147540984	0.9646715328467154	0.03532846715328464	0.8177920685959271	0.7981171548117155	0.8078348332451033
382	1.0	0.0	1.0	1.0	1.0	0.8647990255785627	0.1352009744214373	0.9943741209563994	0.8685503685503686	0.9272131147540984	0.9646715328467154	0.03532846715328464	0.8177920685959271	0.7981171548117155	0.8078348332451033
382	1.0	0.0	1.0	1.0	1.0	0.8647990255785627	0.1352009744214373	0.9943741209563994	0.8685503685503686	0.9272131147540984	0.9646715328467154	0.03532846715328464	0.8177920685959271	0.7981171548117155	0.8078348332451033
382	1.0	0.0	1.0	1.0	1.0	0.8647990255785627	0.1352009744214373	0.9943741209563994	0.8685503685503686	0.9272131147540984	0.9646715328467154	0.03532846715328464	0.8177920685959271	0.7981171548117155	0.8078348332451033
382	1.0	0.0	1.0	1.0	1.0	0.8647990255785627	0.1352009744214373	0.9943741209563994	0.8685503685503686	0.9272131147540984	0.9646715328467154	0.03532846715328464	0.8177920685959271	0.7981171548117155	0.8078348332451033
382	1.0	0.0	1.0	1.0	1.0	0.8647990255785627	0.1352009744214373	0.9943741209563994	0.8685503685503686	0.9272131147540984	0.9646715328467154	0.03532846715328464	0.8177920685959271	0.7981171548117155	0.8078348332451033
382	1.0	0.0	1.0	1.0	1.0	0.8647990255785627	0.1352009744214373	0.9943741209563994	0.8685503685503686	0.9272131147540984	0.9646715328467154	0.03532846715328464	0.8177920685959271	0.7981171548117155	0.8078348332451033
382	1.0	0.0	1.0	1.0	1.0	0.8647990255785627	0.1352009744214373	0.9943741209563994	0.8685503685503686	0.9272131147540984	0.9646715328467154	0.03532846715328464	0.8177920685959271	0.7981171548117155	0.8078348332451033
382	1.0	0.0	1.0	1.0	1.0	0.8647990255785627	0.1352009744214373	0.9943741209563994	0.8685503685503686	0.9272131147540984	0.9646715328467154	0.03532846715328464	0.8177920685959271	0.7981171548117155	0.8078348332451033
382	1.0	0.0	1.0	1.0	1.0	0.8647990255785627	0.1352009744214373	0.9943741209563994	0.8685503685503686	0.9272131147540984	0.9646715328467154	0.03532846715328464	0.8177920685959271	0.7981171548117155	0.8078348332451033
382	1.0	0.0	1.0	1.0	1.0	0.8647990255785627	0.1352009744214373	0.9943741209563994	0.8685503685503686	0.9272131147540984	0.9646715328467154	0.03532846715328464	0.8177920685959271	0.7981171548117155	0.8078348332451033
382	1.0	0.0	1.0	1.0	1.0	0.8647990255785627	0.1352009744214373	0.9943741209563994	0.8685503685503686	0.9272131147540984	0.9646715328467154	0.03532846715328464	0.8177920685959271	0.7981171548117155	0.8078348332451033
382	1.0	0.0	1.0	1.0	1.0	0.8647990255785627	0.1352009744214373	0.9943741209563994	0.8685503685503686	0.9272131147540984	0.9646715328467154	0.03532846715328464	0.8177920685959271	0.7981171548117155	0.8078348332451033
382	1.0	0.0	1.0	1.0	1.0	0.8647990255785627	0.1352009744214373	0.9943741209563994	0.8685503685503686	0.9272131147540984	0.9646715328467154	0.03532846715328464	0.8177920685959271	0.7981171548117155	0.8078348332451033
382	1.0	0.0	1.0	1.0	1.0	0.8647990255785627	0.1352009744214373	0.9943741209563994	0.8685503685503686	0.9272131147540984	0.9646715328467154	0.03532846715328464	0.8177920685959271	0.7981171548117155	0.8078348332451033
382	1.0	0.0	1.0	1.0	1.0	0.8647990255785627	0.1352009744214373	0.9943741209563994	0.8685503685503686	0.9272131147540984	0.9646715328467154	0.03532846715328464	0.8177920685959271	0.7981171548117155	0.8078348332451033
382	1.0	0.0	1.0	1.0	1.0	0.8647990255785627	0.1352009744214373	0.9943741209563994	0.8685503685503686	0.9272131147540984	0.9646715328467154	0.03532846715328464	0.8177920685959271	0.7981171548117155	0.8078348332451033
382	1.0	0.0	1.0	1.0	1.0	0.8647990255785627	0.1352009744214373	0.9943741209563994	0.8685503685503686	0.9272131147540984	0.9646715328467154	0.03532846715328464	0.8177920685959271	0.7981171548117155	0.8078348332451033
382	1.0	0.0	1.0	1.0	1.0	0.8647990255785627	0.1352009744214373	0.9943741209563994	0.8685503685503686	0.9272131147540984	0.9646715328467154	0.03532846715328464	0.8177920685959271	0.7981171548117155	0.8078348332451033
382	1.0	0.0	1.0	1.0	1.0	0.8647990255785627	0.1352009744214373	0.9943741209563994	0.8685503685503686	0.9272131147540984	0.9646715328467154	0.03532846715328464	0.8177920685959271	0.7981171548117155	0.8078348332451033
382	1.0	0.0	1.0	1.0	1.0	0.8647990255785627	0.1352009744214373	0.9943741209563994	0.8685503685503686	0.9272131147540984	0.9646715328467154	0.03532846715328464	0.8177920685959271	0.7981171548117155	0.8078348332451033
382	1.0	0.0	1.0	1.0	1.0	0.8647990255785627	0.1352009744214373	0.9943741209563994	0.8685503685503686	0.9272131147540984	0.9646715328467154	0.03532846715328464	0.8177920685959271	0.7981171548117155	0.8078348332451033
382	1.0	0.0	1.0	1.0	1.0	0.8647990255785627	0.1352009744214373	0.9943741209563994	0.8685503685503686	0.9272131147540984	0.9646715328467154	0.03532846715328464	0.8177920685959271	0.7981171548117155	0.8078348332451033
382	1.0	0.0	1.0	1.0	1.0	0.8647990255785627	0.1352009744214373	0.9943741209563994	0.8685503685503686	0.9272131147540984	0.9646715328467154	0.03532846715328464	0.8177920685959271	0.7981171548117155	0.8078348332451033
382	1.0	0.0	1.0	1.0	1.0	0.8647990255785627	0.1352009744214373	0.9943741209563994	0.8685503685503686	0.9272131147540984	0.9646715328467154	0.03532846715328464	0.8177920685959271	0.7981171548117155	0.8078348332451033
382	1.0	0.0	1.0	1.0	1.0	0.8647990255785627	0.1352009744214373	0.9943741209563994	0.8685503685503686	0.9272131147540984	0.9646715328467154	0.03532846715328464	0.8177920685959271	0.7981171548117155	0.8078348332451033
382	1.0	0.0	1.0	1.0	1.0	0.8647990255785627	0.1352009744214373	0.9943741209563994	0.8685503685503686	0.9272131147540984	0.9646715328467154	0.03532846715328464	0.8177920685959271	0.7981171548117155	0.8078348332451033
382	1.0	0.0	1.0	1.0	1.0	0.8647990255785627	0.1352009744214373	0.9943741209563994	0.8685503685503686	0.9272131147540984	0.9646715328467154	0.03532846715328464	0.8177920685959271	0.7981171548117155	0.8078348332451033
382	1.0	0.0	1.0	1.0	1.0	0.8647990255785627	0.1352009744214373	0.9943741209563994	0.8685503685503686	0.9272131147540984	0.9646715328467154	0.03532846715328464	0.8177920685959271	0.7981171548117155	0.8078348332451033
382	1.0	0.0	1.0	1.0	1.0	0.8647990255785627	0.1352009744214373	0.9943741209563994	0.8685503685503686	0.9272131147540984	0.9646715328467154	0.03532846715328464	0.8177920685959271	0.7981171548117155	0.8078348332451033
382	1.0	0.0	1.0	1.0	1.0	0.8647990255785627	0.1352009744214373	0.9943741209563994	0.8685503685503686	0.9272131147540984	0.9646715328467154	0.03532846715328464	0.8177920685959271	0.7981171548117155	0.8078348332451033
382	1.0	0.0	1.0	1.0	1.0	0.8647990255785627	0.1352009744214373	0.9943741209563994	0.8685503685503686	0.9272131147540984	0.9646715328467154	0.03532846715328464	0.8177920685959271	0.7981171548117155	0.8078348332451033
382	1.0	0.0	1.0	1.0	1.0	0.8647990255785627	0.1352009744214373	0.9943741209563994	0.8685503685503686	0.9272131147540984	0.9646715328467154	0.03532846715328464	0.8177920685959271	0.7981171548117155	0.8078348332451033
382	1.0	0.0	1.0	1.0	1.0	0.8647990255785627	0.1352009744214373	0.9943741209563994	0.8685503685503686	0.9272131147540984	0.9646715328467154	0.03532846715328464	0.8177920685959271	0.7981171548117155	0.8078348332451033
382	1.0	0.0	1.0	1.0	1.0	0.8647990255785627	0.1352009744214373	0.9943741209563994	0.8685503685503686	0.9272131147540984	0.9646715328467154	0.03532846715328464	0.8177920685959271	0.7981171548117155	0.8078348332451033
382	1.0	0.0	1.0	1.0	1.0	0.8647990255785627	0.1352009744214373	0.9943741209563994	0.8685503685503686	0.9272131147540984	0.9646715328467154	0.03532846715328464	0.8177920685959271	0.7981171548117155	0.8078348332451033
382	1.0	0.0	1.0	1.0	1.0	0.8647990255785627	0.1352009744214373	0.9943741209563994	0.8685503685503686	0.9272131147540984	0.9646715328467154	0.03532846715328464	0.8177920685959271	0.7981171548117155	0.8078348332451033
382	1.0	0.0	1.0	1.0	1.0	0.8647990255785627	0.1352009744214373	0.9943741209563994	0.8685503685503686	0.9272131147540984	0.9646715328467154	0.03532846715328464	0.8177920685959271	0.7981171548117155	0.8078348332451033
382	1.0	0.0	1.0	1.0	1.0	0.8647990255785627	0.1352009744214373	0.9943741209563994	0.8685503685503686	0.9272131147540984	0.9646715328467154	0.03532846715328464	0.8177920685959271	0.7981171548117155	0.8078348332451033
382	1.0	0.0	1.0	1.0	1.0	0.8647990255785627	0.1352009744214373	0.9943741209563994	0.8685503685503686	0.9272131147540984	0.9646715328467154	0.03532846715328464	0.8177920685959271	0.7981171548117155	0.8078348332451033
382	1.0	0.0	1.0	1.0	1.0	0.8647990255785627	0.1352009744214373	0.9943741209563994	0.8685503685503686	0.9272131147540984	0.9646715328467154	0.03532846715328464	0.8177920685959271	0.7981171548117155	0.8078348332451033
382	1.0	0.0	1.0	1.0	1.0	0.8647990255785627	0.1352009744214373	0.9943741209563994	0.8685503685503686	0.9272131147540984	0.9646715328467154	0.03532846715328464	0.8177920685959271	0.7981171548117155	0.8078348332451033
382	1.0	0.0	1.0	1.0	1.0	0.8647990255785627	0.1352009744214373	0.9943741209563994	0.8685503685503686	0.9272131147540984	0.9646715328467154	0.03532846715328464	0.8177920685959271	0.7981171548117155	0.8078348332451033
382	1.0	0.0	1.0	1.0	1.0	0.8647990255785627	0.1352009744214373	0.9943741209563994	0.8685503685503686	0.9272131147540984	0.9646715328467154	0.03532846715328464	0.8177920685959271	0.7981171548117155	0.8078348332451033
382	1.0	0.0	1.0	1.0	1.0	0.8647990255785627	0.1352009744214373	0.9943741209563994	0.8685503685503686	0.9272131147540984	0.9646715328467154	0.03532846715328464	0.8177920685959271	0.7981171548117155	0.8078348332451033
382	1.0	0.0	1.0	1.0	1.0	0.8647990255785627	0.1352009744214373	0.9943741209563994	0.8685503685503686	0.9272131147540984	0.9646715328467154	0.03532846715328464	0.8177920685959271	0.7981171548117155	0.8078348332451033
382	1.0	0.0	1.0	1.0	1.0	0.8647990255785627	0.1352009744214373	0.9943741209563994	0.8685503685503686	0.9272131147540984	0.9646715328467154	0.03532846715328464	0.8177920685959271	0.7981171548117155	0.8078348332451033
382	1.0	0.0	1.0	1.0	1.0	0.8647990255785627	0.1352009744214373	0.9943741209563994	0.8685503685503686	0.9272131147540984	0.9646715328467154	0.03532846715328464	0.8177920685959271	0.7981171548117155	0.8078348332451033
382	1.0	0.0	1.0	1.0	1.0	0.8647990255785627	0.1352009744214373	0.9943741209563994	0.8685503685503686	0.9272131147540984	0.9646715328467154	0.03532846715328464	0.8177920685959271	0.7981171548117155	0.8078348332451033
382	1.0	0.0	1.0	1.0	1.0	0.8647990255785627	0.1352009744214373	0.9943741209563994	0.8685503685503686	0.9272131147540984	0.9646715328467154	0.03532846715328464	0.8177920685959271	0.7981171548117155	0.8078348332451033
382	1.0	0.0	1.0	1.0	1.0	0.8647990255785627	0.1352009744214373	0.9943741209563994	0.8685503685503686	0.9272131147540984	0.9646715328467154	0.03532846715328464	0.8177920685959271	0.7981171548117155	0.8078348332451033
382	1.0	0.0	1.0	1.0	1.0	0.8647990255785627	0.1352009744214373	0.9943741209563994	0.8685503685503686	0.9272131147540984	0.9646715328467154	0.03532846715328464	0.8177920685959271	0.7981171548117155	0.8078348332451033
382	1.0	0.0	1.0	1.0	1.0	0.8647990255785627	0.1352009744214373	0.9943741209563994	0.8685503685503686	0.9272131147540984	0.9646715328467154	0.03532846715328464	0.8177920685959271	0.7981171548117155	0.8078348332451033
382	1.0	0.0	1.0	1.0	1.0	0.8647990255785627	0.1352009744214373	0.9943741209563994	0.8685503685503686	0.9272131147540984	0.9646715328467154	0.03532846715328464	0.8177920685959271	0.7981171548117155	0.8078348332451033
382	1.0	0.0	1.0	1.0	1.0	0.8647990255785627	0.1352009744214373	0.9943741209563994	0.8685503685503686	0.9272131147540984	0.9646715328467154	0.03532846715328464	0.8177920685959271	0.7981171548117155	0.8078348332451033
382	1.0	0.0	1.0	1.0	1.0	0.8647990255785627	0.1352009744214373	0.9943741209563994	0.8685503685503686	0.9272131147540984	0.9646715328467154	0.03532846715328464	0.8177920685959271	0.7981171548117155	0.8078348332451033
382	1.0	0.0	1.0	1.0	1.0	0.8647990255785627	0.1352009744214373	0.9943741209563994	0.8685503685503686	0.9272131147540984	0.9646715328467154	0.03532846715328464	0.8177920685959271	0.7981171548117155	0.8078348332451033
382	1.0	0.0	1.0	1.0	1.0	0.8647990255785627	0.1352009744214373	0.9943741209563994	0.8685503685503686	0.9272131147540984	0.9646715328467154	0.03532846715328464	0.8177920685959271	0.7981171548117155	0.8078348332451033
382	1.0	0.0	1.0	1.0	1.0	0.8647990255785627	0.1352009744214373	0.9943741209563994	0.8685503685503686	0.9272131147540984	0.9646715328467154	0.03532846715328464	0.8177920685959271	0.7981171548117155	0.8078348332451033
382	1.0	0.0	1.0	1.0	1.0	0.8647990255785627	0.1352009744214373	0.9943741209563994	0.8685503685503686	0.9272131147540984	0.9646715328467154	0.03532846715328464	0.8177920685959271	0.7981171548117155	0.8078348332451033
382	1.0	0.0	1.0	1.0	1.0	0.8647990255785627	0.1352009744214373	0.9943741209563994	0.8685503685503686	0.9272131147540984	0.9646715328467154	0.03532846715328464	0.8177920685959271	0.7981171548117155	0.8078348332451033
382	1.0	0.0	1.0	1.0	1.0	0.8647990255785627	0.1352009744214373	0.9943741209563994	0.8685503685503686	0.9272131147540984	0.9646715328467154	0.03532846715328464	0.8177920685959271	0.7981171548117155	0.8078348332451033
382	1.0	0.0	1.0	1.0	1.0	0.8647990255785627	0.1352009744214373	0.9943741209563994	0.8685503685503686	0.9272131147540984	0.9646715328467154	0.03532846715328464	0.8177920685959271	0.7981171548117155	0.8078348332451033
382	1.0	0.0	1.0	1.0	1.0	0.8647990255785627	0.1352009744214373	0.9943741209563994	0.8685503685503686	0.9272131147540984	0.9646715328467154	0.03532846715328464	0.8177920685959271	0.7981171548117155	0.8078348332451033
382	1.0	0.0	1.0	1.0	1.0	0.8647990255785627	0.1352009744214373	0.9943741209563994	0.8685503685503686	0.9272131147540984	0.9646715328467154	0.03532846715328464	0.8177920685959271	0.7981171548117155	0.8078348332451033
356	1.0	0.0	1.0	1.0	1.0	0.8195876288659794	0.18041237113402064	0.9968602825745683	0.8214747736093143	0.9007092198581559	0.9794454140003879	0.02055458599961213	0.8875621890547264	0.900100908173562	0.8937875751503006
356	1.0	0.0	1.0	1.0	1.0	0.8195876288659794	0.18041237113402064	0.9968602825745683	0.8214747736093143	0.9007092198581559	0.9794454140003879	0.02055458599961213	0.8875621890547264	0.900100908173562	0.8937875751503006
356	1.0	0.0	1.0	1.0	1.0	0.8195876288659794	0.18041237113402064	0.9968602825745683	0.8214747736093143	0.9007092198581559	0.9794454140003879	0.02055458599961213	0.8875621890547264	0.900100908173562	0.8937875751503006
356	1.0	0.0	1.0	1.0	1.0	0.8195876288659794	0.18041237113402064	0.9968602825745683	0.8214747736093143	0.9007092198581559	0.9794454140003879	0.02055458599961213	0.8875621890547264	0.900100908173562	0.8937875751503006
356	1.0	0.0	1.0	1.0	1.0	0.8195876288659794	0.18041237113402064	0.9968602825745683	0.8214747736093143	0.9007092198581559	0.9794454140003879	0.02055458599961213	0.8875621890547264	0.900100908173562	0.8937875751503006
356	1.0	0.0	1.0	1.0	1.0	0.8195876288659794	0.18041237113402064	0.9968602825745683	0.8214747736093143	0.9007092198581559	0.9794454140003879	0.02055458599961213	0.8875621890547264	0.900100908173562	0.8937875751503006
356	1.0	0.0	1.0	1.0	1.0	0.8195876288659794	0.18041237113402064	0.9968602825745683	0.8214747736093143	0.9007092198581559	0.9794454140003879	0.02055458599961213	0.8875621890547264	0.900100908173562	0.8937875751503006
