# Supplementary material for: An Improved Hybrid Feature Selection Algorithm for Electric Charge Recovery Risk
Source: Hindawi journal article supplement (doi:10.1155/2020/8479341), 2020-08-28
Supplement: f1 [file 8479341.f1.zip › 8479341.f1/Experimental Results/201808/CBPSO_SBS_results.csv]

features_num	Accuracy_high	Loss_high	Precission_high	Recall_high	F1_high	Accuracy_med	Loss_med	Precission_med	Recall_med	F1_med	Accuracy_low	Loss_low	Precission_low	Recall_low	F1_low
356	1	0	1	1	1	0.824408468	0.175591532	0.996978852	0.826032541	0.90349076	0.978804084	0.021195916	0.874371859	0.903426791	0.8886619
356	1	0	1	1	1	0.824408468	0.175591532	0.996978852	0.826032541	0.90349076	0.978804084	0.021195916	0.874371859	0.903426791	0.8886619
356	1	0	1	1	1	0.824408468	0.175591532	0.996978852	0.826032541	0.90349076	0.978804084	0.021195916	0.874371859	0.903426791	0.8886619
356	1	0	1	1	1	0.824408468	0.175591532	0.996978852	0.826032541	0.90349076	0.978804084	0.021195916	0.874371859	0.903426791	0.8886619
356	1	0	1	1	1	0.824408468	0.175591532	0.996978852	0.826032541	0.90349076	0.978804084	0.021195916	0.874371859	0.903426791	0.8886619
356	1	0	1	1	1	0.824408468	0.175591532	0.996978852	0.826032541	0.90349076	0.978804084	0.021195916	0.874371859	0.903426791	0.8886619
356	1	0	1	1	1	0.824408468	0.175591532	0.996978852	0.826032541	0.90349076	0.978804084	0.021195916	0.874371859	0.903426791	0.8886619
356	1	0	1	1	1	0.824408468	0.175591532	0.996978852	0.826032541	0.90349076	0.978804084	0.021195916	0.874371859	0.903426791	0.8886619
356	1	0	1	1	1	0.824408468	0.175591532	0.996978852	0.826032541	0.90349076	0.978804084	0.021195916	0.874371859	0.903426791	0.8886619
356	1	0	1	1	1	0.824408468	0.175591532	0.996978852	0.826032541	0.90349076	0.978804084	0.021195916	0.874371859	0.903426791	0.8886619
356	1	0	1	1	1	0.824408468	0.175591532	0.996978852	0.826032541	0.90349076	0.978804084	0.021195916	0.874371859	0.903426791	0.8886619
356	1	0	1	1	1	0.824408468	0.175591532	0.996978852	0.826032541	0.90349076	0.978804084	0.021195916	0.874371859	0.903426791	0.8886619
356	1	0	1	1	1	0.824408468	0.175591532	0.996978852	0.826032541	0.90349076	0.978804084	0.021195916	0.874371859	0.903426791	0.8886619
356	1	0	1	1	1	0.824408468	0.175591532	0.996978852	0.826032541	0.90349076	0.978804084	0.021195916	0.874371859	0.903426791	0.8886619
356	1	0	1	1	1	0.824408468	0.175591532	0.996978852	0.826032541	0.90349076	0.978804084	0.021195916	0.874371859	0.903426791	0.8886619
356	1	0	1	1	1	0.824408468	0.175591532	0.996978852	0.826032541	0.90349076	0.978804084	0.021195916	0.874371859	0.903426791	0.8886619
356	1	0	1	1	1	0.824408468	0.175591532	0.996978852	0.826032541	0.90349076	0.978804084	0.021195916	0.874371859	0.903426791	0.8886619
356	1	0	1	1	1	0.824408468	0.175591532	0.996978852	0.826032541	0.90349076	0.978804084	0.021195916	0.874371859	0.903426791	0.8886619
356	1	0	1	1	1	0.824408468	0.175591532	0.996978852	0.826032541	0.90349076	0.978804084	0.021195916	0.874371859	0.903426791	0.8886619
356	1	0	1	1	1	0.824408468	0.175591532	0.996978852	0.826032541	0.90349076	0.978804084	0.021195916	0.874371859	0.903426791	0.8886619
356	1	0	1	1	1	0.824408468	0.175591532	0.996978852	0.826032541	0.90349076	0.978804084	0.021195916	0.874371859	0.903426791	0.8886619
356	1	0	1	1	1	0.824408468	0.175591532	0.996978852	0.826032541	0.90349076	0.978804084	0.021195916	0.874371859	0.903426791	0.8886619
356	1	0	1	1	1	0.824408468	0.175591532	0.996978852	0.826032541	0.90349076	0.978804084	0.021195916	0.874371859	0.903426791	0.8886619
356	1	0	1	1	1	0.824408468	0.175591532	0.996978852	0.826032541	0.90349076	0.978804084	0.021195916	0.874371859	0.903426791	0.8886619
356	1	0	1	1	1	0.824408468	0.175591532	0.996978852	0.826032541	0.90349076	0.978804084	0.021195916	0.874371859	0.903426791	0.8886619
356	1	0	1	1	1	0.824408468	0.175591532	0.996978852	0.826032541	0.90349076	0.978804084	0.021195916	0.874371859	0.903426791	0.8886619
355	1	0	1	1	1	0.821336761	0.178663239	0.996875	0.823225806	0.901766784	0.97905353	0.02094647	0.883813307	0.899898888	0.891783567
355	1	0	1	1	1	0.821336761	0.178663239	0.996875	0.823225806	0.901766784	0.97905353	0.02094647	0.883813307	0.899898888	0.891783567
355	1	0	1	1	1	0.821336761	0.178663239	0.996875	0.823225806	0.901766784	0.97905353	0.02094647	0.883813307	0.899898888	0.891783567
355	1	0	1	1	1	0.821336761	0.178663239	0.996875	0.823225806	0.901766784	0.97905353	0.02094647	0.883813307	0.899898888	0.891783567
355	1	0	1	1	1	0.821336761	0.178663239	0.996875	0.823225806	0.901766784	0.97905353	0.02094647	0.883813307	0.899898888	0.891783567
355	1	0	1	1	1	0.821336761	0.178663239	0.996875	0.823225806	0.901766784	0.97905353	0.02094647	0.883813307	0.899898888	0.891783567
355	1	0	1	1	1	0.821336761	0.178663239	0.996875	0.823225806	0.901766784	0.97905353	0.02094647	0.883813307	0.899898888	0.891783567
355	1	0	1	1	1	0.821336761	0.178663239	0.996875	0.823225806	0.901766784	0.97905353	0.02094647	0.883813307	0.899898888	0.891783567
354	1	0	1	1	1	0.832920792	0.167079208	0.997028232	0.834577114	0.90859851	0.978307393	0.021692607	0.868605817	0.903966597	0.885933504
354	1	0	1	1	1	0.832920792	0.167079208	0.997028232	0.834577114	0.90859851	0.978307393	0.021692607	0.868605817	0.903966597	0.885933504
354	1	0	1	1	1	0.832920792	0.167079208	0.997028232	0.834577114	0.90859851	0.978307393	0.021692607	0.868605817	0.903966597	0.885933504
354	1	0	1	1	1	0.832920792	0.167079208	0.997028232	0.834577114	0.90859851	0.978307393	0.021692607	0.868605817	0.903966597	0.885933504
354	1	0	1	1	1	0.832920792	0.167079208	0.997028232	0.834577114	0.90859851	0.978307393	0.021692607	0.868605817	0.903966597	0.885933504
354	1	0	1	1	1	0.832920792	0.167079208	0.997028232	0.834577114	0.90859851	0.978307393	0.021692607	0.868605817	0.903966597	0.885933504
354	1	0	1	1	1	0.832920792	0.167079208	0.997028232	0.834577114	0.90859851	0.978307393	0.021692607	0.868605817	0.903966597	0.885933504
354	1	0	1	1	1	0.832920792	0.167079208	0.997028232	0.834577114	0.90859851	0.978307393	0.021692607	0.868605817	0.903966597	0.885933504
354	1	0	1	1	1	0.832920792	0.167079208	0.997028232	0.834577114	0.90859851	0.978307393	0.021692607	0.868605817	0.903966597	0.885933504
354	1	0	1	1	1	0.832920792	0.167079208	0.997028232	0.834577114	0.90859851	0.978307393	0.021692607	0.868605817	0.903966597	0.885933504
354	1	0	1	1	1	0.832920792	0.167079208	0.997028232	0.834577114	0.90859851	0.978307393	0.021692607	0.868605817	0.903966597	0.885933504
354	1	0	1	1	1	0.832920792	0.167079208	0.997028232	0.834577114	0.90859851	0.978307393	0.021692607	0.868605817	0.903966597	0.885933504
354	1	0	1	1	1	0.832920792	0.167079208	0.997028232	0.834577114	0.90859851	0.978307393	0.021692607	0.868605817	0.903966597	0.885933504
354	1	0	1	1	1	0.832920792	0.167079208	0.997028232	0.834577114	0.90859851	0.978307393	0.021692607	0.868605817	0.903966597	0.885933504
354	1	0	1	1	1	0.832920792	0.167079208	0.997028232	0.834577114	0.90859851	0.978307393	0.021692607	0.868605817	0.903966597	0.885933504
353	1	0	1	1	1	0.827272727	0.172727273	0.996865204	0.829204694	0.905338078	0.979360465	0.020639535	0.888118812	0.899699097	0.89387145
353	1	0	1	1	1	0.827272727	0.172727273	0.996865204	0.829204694	0.905338078	0.979360465	0.020639535	0.888118812	0.899699097	0.89387145
353	1	0	1	1	1	0.827272727	0.172727273	0.996865204	0.829204694	0.905338078	0.979360465	0.020639535	0.888118812	0.899699097	0.89387145
353	1	0	1	1	1	0.827272727	0.172727273	0.996865204	0.829204694	0.905338078	0.979360465	0.020639535	0.888118812	0.899699097	0.89387145
352	1	0	1	1	1	0.826612903	0.173387097	0.998371336	0.827260459	0.904797048	0.980289855	0.019710145	0.901463415	0.899707887	0.900584795
352	1	0	1	1	1	0.826612903	0.173387097	0.998371336	0.827260459	0.904797048	0.980289855	0.019710145	0.901463415	0.899707887	0.900584795
352	1	0	1	1	1	0.826612903	0.173387097	0.998371336	0.827260459	0.904797048	0.980289855	0.019710145	0.901463415	0.899707887	0.900584795
352	1	0	1	1	1	0.826612903	0.173387097	0.998371336	0.827260459	0.904797048	0.980289855	0.019710145	0.901463415	0.899707887	0.900584795
352	1	0	1	1	1	0.826612903	0.173387097	0.998371336	0.827260459	0.904797048	0.980289855	0.019710145	0.901463415	0.899707887	0.900584795
352	1	0	1	1	1	0.826612903	0.173387097	0.998371336	0.827260459	0.904797048	0.980289855	0.019710145	0.901463415	0.899707887	0.900584795
352	1	0	1	1	1	0.826612903	0.173387097	0.998371336	0.827260459	0.904797048	0.980289855	0.019710145	0.901463415	0.899707887	0.900584795
352	1	0	1	1	1	0.826612903	0.173387097	0.998371336	0.827260459	0.904797048	0.980289855	0.019710145	0.901463415	0.899707887	0.900584795
352	1	0	1	1	1	0.826612903	0.173387097	0.998371336	0.827260459	0.904797048	0.980289855	0.019710145	0.901463415	0.899707887	0.900584795
352	1	0	1	1	1	0.826612903	0.173387097	0.998371336	0.827260459	0.904797048	0.980289855	0.019710145	0.901463415	0.899707887	0.900584795
352	1	0	1	1	1	0.826612903	0.173387097	0.998371336	0.827260459	0.904797048	0.980289855	0.019710145	0.901463415	0.899707887	0.900584795
352	1	0	1	1	1	0.826612903	0.173387097	0.998371336	0.827260459	0.904797048	0.980289855	0.019710145	0.901463415	0.899707887	0.900584795
352	1	0	1	1	1	0.826612903	0.173387097	0.998371336	0.827260459	0.904797048	0.980289855	0.019710145	0.901463415	0.899707887	0.900584795
352	1	0	1	1	1	0.826612903	0.173387097	0.998371336	0.827260459	0.904797048	0.980289855	0.019710145	0.901463415	0.899707887	0.900584795
352	1	0	1	1	1	0.826612903	0.173387097	0.998371336	0.827260459	0.904797048	0.980289855	0.019710145	0.901463415	0.899707887	0.900584795
352	1	0	1	1	1	0.826612903	0.173387097	0.998371336	0.827260459	0.904797048	0.980289855	0.019710145	0.901463415	0.899707887	0.900584795
352	1	0	1	1	1	0.826612903	0.173387097	0.998371336	0.827260459	0.904797048	0.980289855	0.019710145	0.901463415	0.899707887	0.900584795
352	1	0	1	1	1	0.826612903	0.173387097	0.998371336	0.827260459	0.904797048	0.980289855	0.019710145	0.901463415	0.899707887	0.900584795
352	1	0	1	1	1	0.826612903	0.173387097	0.998371336	0.827260459	0.904797048	0.980289855	0.019710145	0.901463415	0.899707887	0.900584795
352	1	0	1	1	1	0.826612903	0.173387097	0.998371336	0.827260459	0.904797048	0.980289855	0.019710145	0.901463415	0.899707887	0.900584795
352	1	0	1	1	1	0.826612903	0.173387097	0.998371336	0.827260459	0.904797048	0.980289855	0.019710145	0.901463415	0.899707887	0.900584795
352	1	0	1	1	1	0.826612903	0.173387097	0.998371336	0.827260459	0.904797048	0.980289855	0.019710145	0.901463415	0.899707887	0.900584795
352	1	0	1	1	1	0.826612903	0.173387097	0.998371336	0.827260459	0.904797048	0.980289855	0.019710145	0.901463415	0.899707887	0.900584795
352	1	0	1	1	1	0.826612903	0.173387097	0.998371336	0.827260459	0.904797048	0.980289855	0.019710145	0.901463415	0.899707887	0.900584795
352	1	0	1	1	1	0.826612903	0.173387097	0.998371336	0.827260459	0.904797048	0.980289855	0.019710145	0.901463415	0.899707887	0.900584795
352	1	0	1	1	1	0.826612903	0.173387097	0.998371336	0.827260459	0.904797048	0.980289855	0.019710145	0.901463415	0.899707887	0.900584795
352	1	0	1	1	1	0.826612903	0.173387097	0.998371336	0.827260459	0.904797048	0.980289855	0.019710145	0.901463415	0.899707887	0.900584795
352	1	0	1	1	1	0.826612903	0.173387097	0.998371336	0.827260459	0.904797048	0.980289855	0.019710145	0.901463415	0.899707887	0.900584795
352	1	0	1	1	1	0.826612903	0.173387097	0.998371336	0.827260459	0.904797048	0.980289855	0.019710145	0.901463415	0.899707887	0.900584795
352	1	0	1	1	1	0.826612903	0.173387097	0.998371336	0.827260459	0.904797048	0.980289855	0.019710145	0.901463415	0.899707887	0.900584795
352	1	0	1	1	1	0.826612903	0.173387097	0.998371336	0.827260459	0.904797048	0.980289855	0.019710145	0.901463415	0.899707887	0.900584795
352	1	0	1	1	1	0.826612903	0.173387097	0.998371336	0.827260459	0.904797048	0.980289855	0.019710145	0.901463415	0.899707887	0.900584795
352	1	0	1	1	1	0.826612903	0.173387097	0.998371336	0.827260459	0.904797048	0.980289855	0.019710145	0.901463415	0.899707887	0.900584795
352	1	0	1	1	1	0.826612903	0.173387097	0.998371336	0.827260459	0.904797048	0.980289855	0.019710145	0.901463415	0.899707887	0.900584795
352	1	0	1	1	1	0.826612903	0.173387097	0.998371336	0.827260459	0.904797048	0.980289855	0.019710145	0.901463415	0.899707887	0.900584795
352	1	0	1	1	1	0.826612903	0.173387097	0.998371336	0.827260459	0.904797048	0.980289855	0.019710145	0.901463415	0.899707887	0.900584795
352	1	0	1	1	1	0.826612903	0.173387097	0.998371336	0.827260459	0.904797048	0.980289855	0.019710145	0.901463415	0.899707887	0.900584795
352	1	0	1	1	1	0.826612903	0.173387097	0.998371336	0.827260459	0.904797048	0.980289855	0.019710145	0.901463415	0.899707887	0.900584795
352	1	0	1	1	1	0.826612903	0.173387097	0.998371336	0.827260459	0.904797048	0.980289855	0.019710145	0.901463415	0.899707887	0.900584795
352	1	0	1	1	1	0.826612903	0.173387097	0.998371336	0.827260459	0.904797048	0.980289855	0.019710145	0.901463415	0.899707887	0.900584795
352	1	0	1	1	1	0.826612903	0.173387097	0.998371336	0.827260459	0.904797048	0.980289855	0.019710145	0.901463415	0.899707887	0.900584795
352	1	0	1	1	1	0.826612903	0.173387097	0.998371336	0.827260459	0.904797048	0.980289855	0.019710145	0.901463415	0.899707887	0.900584795
352	1	0	1	1	1	0.826612903	0.173387097	0.998371336	0.827260459	0.904797048	0.980289855	0.019710145	0.901463415	0.899707887	0.900584795
352	1	0	1	1	1	0.826612903	0.173387097	0.998371336	0.827260459	0.904797048	0.980289855	0.019710145	0.901463415	0.899707887	0.900584795
352	1	0	1	1	1	0.826612903	0.173387097	0.998371336	0.827260459	0.904797048	0.980289855	0.019710145	0.901463415	0.899707887	0.900584795
352	1	0	1	1	1	0.826612903	0.173387097	0.998371336	0.827260459	0.904797048	0.980289855	0.019710145	0.901463415	0.899707887	0.900584795
352	1	0	1	1	1	0.826612903	0.173387097	0.998371336	0.827260459	0.904797048	0.980289855	0.019710145	0.901463415	0.899707887	0.900584795
352	1	0	1	1	1	0.826612903	0.173387097	0.998371336	0.827260459	0.904797048	0.980289855	0.019710145	0.901463415	0.899707887	0.900584795
352	1	0	1	1	1	0.826612903	0.173387097	0.998371336	0.827260459	0.904797048	0.980289855	0.019710145	0.901463415	0.899707887	0.900584795
352	1	0	1	1	1	0.826612903	0.173387097	0.998371336	0.827260459	0.904797048	0.980289855	0.019710145	0.901463415	0.899707887	0.900584795
352	1	0	1	1	1	0.826612903	0.173387097	0.998371336	0.827260459	0.904797048	0.980289855	0.019710145	0.901463415	0.899707887	0.900584795
352	1	0	1	1	1	0.826612903	0.173387097	0.998371336	0.827260459	0.904797048	0.980289855	0.019710145	0.901463415	0.899707887	0.900584795
352	1	0	1	1	1	0.826612903	0.173387097	0.998371336	0.827260459	0.904797048	0.980289855	0.019710145	0.901463415	0.899707887	0.900584795
352	1	0	1	1	1	0.826612903	0.173387097	0.998371336	0.827260459	0.904797048	0.980289855	0.019710145	0.901463415	0.899707887	0.900584795
352	1	0	1	1	1	0.826612903	0.173387097	0.998371336	0.827260459	0.904797048	0.980289855	0.019710145	0.901463415	0.899707887	0.900584795
352	1	0	1	1	1	0.826612903	0.173387097	0.998371336	0.827260459	0.904797048	0.980289855	0.019710145	0.901463415	0.899707887	0.900584795
352	1	0	1	1	1	0.826612903	0.173387097	0.998371336	0.827260459	0.904797048	0.980289855	0.019710145	0.901463415	0.899707887	0.900584795
352	1	0	1	1	1	0.826612903	0.173387097	0.998371336	0.827260459	0.904797048	0.980289855	0.019710145	0.901463415	0.899707887	0.900584795
352	1	0	1	1	1	0.826612903	0.173387097	0.998371336	0.827260459	0.904797048	0.980289855	0.019710145	0.901463415	0.899707887	0.900584795
352	1	0	1	1	1	0.826612903	0.173387097	0.998371336	0.827260459	0.904797048	0.980289855	0.019710145	0.901463415	0.899707887	0.900584795
352	1	0	1	1	1	0.826612903	0.173387097	0.998371336	0.827260459	0.904797048	0.980289855	0.019710145	0.901463415	0.899707887	0.900584795
352	1	0	1	1	1	0.826612903	0.173387097	0.998371336	0.827260459	0.904797048	0.980289855	0.019710145	0.901463415	0.899707887	0.900584795
352	1	0	1	1	1	0.826612903	0.173387097	0.998371336	0.827260459	0.904797048	0.980289855	0.019710145	0.901463415	0.899707887	0.900584795
352	1	0	1	1	1	0.826612903	0.173387097	0.998371336	0.827260459	0.904797048	0.980289855	0.019710145	0.901463415	0.899707887	0.900584795
352	1	0	1	1	1	0.826612903	0.173387097	0.998371336	0.827260459	0.904797048	0.980289855	0.019710145	0.901463415	0.899707887	0.900584795
352	1	0	1	1	1	0.826612903	0.173387097	0.998371336	0.827260459	0.904797048	0.980289855	0.019710145	0.901463415	0.899707887	0.900584795
352	1	0	1	1	1	0.826612903	0.173387097	0.998371336	0.827260459	0.904797048	0.980289855	0.019710145	0.901463415	0.899707887	0.900584795
352	1	0	1	1	1	0.826612903	0.173387097	0.998371336	0.827260459	0.904797048	0.980289855	0.019710145	0.901463415	0.899707887	0.900584795
352	1	0	1	1	1	0.826612903	0.173387097	0.998371336	0.827260459	0.904797048	0.980289855	0.019710145	0.901463415	0.899707887	0.900584795
352	1	0	1	1	1	0.826612903	0.173387097	0.998371336	0.827260459	0.904797048	0.980289855	0.019710145	0.901463415	0.899707887	0.900584795
352	1	0	1	1	1	0.826612903	0.173387097	0.998371336	0.827260459	0.904797048	0.980289855	0.019710145	0.901463415	0.899707887	0.900584795
352	1	0	1	1	1	0.826612903	0.173387097	0.998371336	0.827260459	0.904797048	0.980289855	0.019710145	0.901463415	0.899707887	0.900584795
352	1	0	1	1	1	0.826612903	0.173387097	0.998371336	0.827260459	0.904797048	0.980289855	0.019710145	0.901463415	0.899707887	0.900584795
352	1	0	1	1	1	0.826612903	0.173387097	0.998371336	0.827260459	0.904797048	0.980289855	0.019710145	0.901463415	0.899707887	0.900584795
352	1	0	1	1	1	0.826612903	0.173387097	0.998371336	0.827260459	0.904797048	0.980289855	0.019710145	0.901463415	0.899707887	0.900584795
352	1	0	1	1	1	0.826612903	0.173387097	0.998371336	0.827260459	0.904797048	0.980289855	0.019710145	0.901463415	0.899707887	0.900584795
352	1	0	1	1	1	0.826612903	0.173387097	0.998371336	0.827260459	0.904797048	0.980289855	0.019710145	0.901463415	0.899707887	0.900584795
352	1	0	1	1	1	0.826612903	0.173387097	0.998371336	0.827260459	0.904797048	0.980289855	0.019710145	0.901463415	0.899707887	0.900584795
352	1	0	1	1	1	0.826612903	0.173387097	0.998371336	0.827260459	0.904797048	0.980289855	0.019710145	0.901463415	0.899707887	0.900584795
352	1	0	1	1	1	0.826612903	0.173387097	0.998371336	0.827260459	0.904797048	0.980289855	0.019710145	0.901463415	0.899707887	0.900584795
352	1	0	1	1	1	0.826612903	0.173387097	0.998371336	0.827260459	0.904797048	0.980289855	0.019710145	0.901463415	0.899707887	0.900584795
352	1	0	1	1	1	0.826612903	0.173387097	0.998371336	0.827260459	0.904797048	0.980289855	0.019710145	0.901463415	0.899707887	0.900584795
352	1	0	1	1	1	0.826612903	0.173387097	0.998371336	0.827260459	0.904797048	0.980289855	0.019710145	0.901463415	0.899707887	0.900584795
352	1	0	1	1	1	0.826612903	0.173387097	0.998371336	0.827260459	0.904797048	0.980289855	0.019710145	0.901463415	0.899707887	0.900584795
352	1	0	1	1	1	0.826612903	0.173387097	0.998371336	0.827260459	0.904797048	0.980289855	0.019710145	0.901463415	0.899707887	0.900584795
352	1	0	1	1	1	0.826612903	0.173387097	0.998371336	0.827260459	0.904797048	0.980289855	0.019710145	0.901463415	0.899707887	0.900584795
352	1	0	1	1	1	0.826612903	0.173387097	0.998371336	0.827260459	0.904797048	0.980289855	0.019710145	0.901463415	0.899707887	0.900584795
352	1	0	1	1	1	0.826612903	0.173387097	0.998371336	0.827260459	0.904797048	0.980289855	0.019710145	0.901463415	0.899707887	0.900584795
352	1	0	1	1	1	0.826612903	0.173387097	0.998371336	0.827260459	0.904797048	0.980289855	0.019710145	0.901463415	0.899707887	0.900584795
352	1	0	1	1	1	0.826612903	0.173387097	0.998371336	0.827260459	0.904797048	0.980289855	0.019710145	0.901463415	0.899707887	0.900584795
352	1	0	1	1	1	0.826612903	0.173387097	0.998371336	0.827260459	0.904797048	0.980289855	0.019710145	0.901463415	0.899707887	0.900584795
352	1	0	1	1	1	0.826612903	0.173387097	0.998371336	0.827260459	0.904797048	0.980289855	0.019710145	0.901463415	0.899707887	0.900584795
352	1	0	1	1	1	0.826612903	0.173387097	0.998371336	0.827260459	0.904797048	0.980289855	0.019710145	0.901463415	0.899707887	0.900584795
352	1	0	1	1	1	0.826612903	0.173387097	0.998371336	0.827260459	0.904797048	0.980289855	0.019710145	0.901463415	0.899707887	0.900584795
352	1	0	1	1	1	0.826612903	0.173387097	0.998371336	0.827260459	0.904797048	0.980289855	0.019710145	0.901463415	0.899707887	0.900584795
352	1	0	1	1	1	0.826612903	0.173387097	0.998371336	0.827260459	0.904797048	0.980289855	0.019710145	0.901463415	0.899707887	0.900584795
352	1	0	1	1	1	0.826612903	0.173387097	0.998371336	0.827260459	0.904797048	0.980289855	0.019710145	0.901463415	0.899707887	0.900584795
352	1	0	1	1	1	0.826612903	0.173387097	0.998371336	0.827260459	0.904797048	0.980289855	0.019710145	0.901463415	0.899707887	0.900584795
352	1	0	1	1	1	0.826612903	0.173387097	0.998371336	0.827260459	0.904797048	0.980289855	0.019710145	0.901463415	0.899707887	0.900584795
352	1	0	1	1	1	0.826612903	0.173387097	0.998371336	0.827260459	0.904797048	0.980289855	0.019710145	0.901463415	0.899707887	0.900584795
352	1	0	1	1	1	0.826612903	0.173387097	0.998371336	0.827260459	0.904797048	0.980289855	0.019710145	0.901463415	0.899707887	0.900584795
352	1	0	1	1	1	0.826612903	0.173387097	0.998371336	0.827260459	0.904797048	0.980289855	0.019710145	0.901463415	0.899707887	0.900584795
352	1	0	1	1	1	0.826612903	0.173387097	0.998371336	0.827260459	0.904797048	0.980289855	0.019710145	0.901463415	0.899707887	0.900584795
352	1	0	1	1	1	0.826612903	0.173387097	0.998371336	0.827260459	0.904797048	0.980289855	0.019710145	0.901463415	0.899707887	0.900584795
352	1	0	1	1	1	0.826612903	0.173387097	0.998371336	0.827260459	0.904797048	0.980289855	0.019710145	0.901463415	0.899707887	0.900584795
352	1	0	1	1	1	0.826612903	0.173387097	0.998371336	0.827260459	0.904797048	0.980289855	0.019710145	0.901463415	0.899707887	0.900584795
352	1	0	1	1	1	0.826612903	0.173387097	0.998371336	0.827260459	0.904797048	0.980289855	0.019710145	0.901463415	0.899707887	0.900584795
352	1	0	1	1	1	0.826612903	0.173387097	0.998371336	0.827260459	0.904797048	0.980289855	0.019710145	0.901463415	0.899707887	0.900584795
352	1	0	1	1	1	0.826612903	0.173387097	0.998371336	0.827260459	0.904797048	0.980289855	0.019710145	0.901463415	0.899707887	0.900584795
352	1	0	1	1	1	0.826612903	0.173387097	0.998371336	0.827260459	0.904797048	0.980289855	0.019710145	0.901463415	0.899707887	0.900584795
352	1	0	1	1	1	0.826612903	0.173387097	0.998371336	0.827260459	0.904797048	0.980289855	0.019710145	0.901463415	0.899707887	0.900584795
352	1	0	1	1	1	0.826612903	0.173387097	0.998371336	0.827260459	0.904797048	0.980289855	0.019710145	0.901463415	0.899707887	0.900584795
352	1	0	1	1	1	0.826612903	0.173387097	0.998371336	0.827260459	0.904797048	0.980289855	0.019710145	0.901463415	0.899707887	0.900584795
352	1	0	1	1	1	0.826612903	0.173387097	0.998371336	0.827260459	0.904797048	0.980289855	0.019710145	0.901463415	0.899707887	0.900584795
352	1	0	1	1	1	0.826612903	0.173387097	0.998371336	0.827260459	0.904797048	0.980289855	0.019710145	0.901463415	0.899707887	0.900584795
352	1	0	1	1	1	0.826612903	0.173387097	0.998371336	0.827260459	0.904797048	0.980289855	0.019710145	0.901463415	0.899707887	0.900584795
352	1	0	1	1	1	0.826612903	0.173387097	0.998371336	0.827260459	0.904797048	0.980289855	0.019710145	0.901463415	0.899707887	0.900584795
352	1	0	1	1	1	0.826612903	0.173387097	0.998371336	0.827260459	0.904797048	0.980289855	0.019710145	0.901463415	0.899707887	0.900584795
352	1	0	1	1	1	0.826612903	0.173387097	0.998371336	0.827260459	0.904797048	0.980289855	0.019710145	0.901463415	0.899707887	0.900584795
352	1	0	1	1	1	0.826612903	0.173387097	0.998371336	0.827260459	0.904797048	0.980289855	0.019710145	0.901463415	0.899707887	0.900584795
352	1	0	1	1	1	0.826612903	0.173387097	0.998371336	0.827260459	0.904797048	0.980289855	0.019710145	0.901463415	0.899707887	0.900584795
352	1	0	1	1	1	0.826612903	0.173387097	0.998371336	0.827260459	0.904797048	0.980289855	0.019710145	0.901463415	0.899707887	0.900584795
352	1	0	1	1	1	0.826612903	0.173387097	0.998371336	0.827260459	0.904797048	0.980289855	0.019710145	0.901463415	0.899707887	0.900584795
352	1	0	1	1	1	0.826612903	0.173387097	0.998371336	0.827260459	0.904797048	0.980289855	0.019710145	0.901463415	0.899707887	0.900584795
352	1	0	1	1	1	0.826612903	0.173387097	0.998371336	0.827260459	0.904797048	0.980289855	0.019710145	0.901463415	0.899707887	0.900584795
352	1	0	1	1	1	0.826612903	0.173387097	0.998371336	0.827260459	0.904797048	0.980289855	0.019710145	0.901463415	0.899707887	0.900584795
352	1	0	1	1	1	0.826612903	0.173387097	0.998371336	0.827260459	0.904797048	0.980289855	0.019710145	0.901463415	0.899707887	0.900584795
352	1	0	1	1	1	0.826612903	0.173387097	0.998371336	0.827260459	0.904797048	0.980289855	0.019710145	0.901463415	0.899707887	0.900584795
352	1	0	1	1	1	0.826612903	0.173387097	0.998371336	0.827260459	0.904797048	0.980289855	0.019710145	0.901463415	0.899707887	0.900584795
352	1	0	1	1	1	0.826612903	0.173387097	0.998371336	0.827260459	0.904797048	0.980289855	0.019710145	0.901463415	0.899707887	0.900584795
352	1	0	1	1	1	0.826612903	0.173387097	0.998371336	0.827260459	0.904797048	0.980289855	0.019710145	0.901463415	0.899707887	0.900584795
352	1	0	1	1	1	0.826612903	0.173387097	0.998371336	0.827260459	0.904797048	0.980289855	0.019710145	0.901463415	0.899707887	0.900584795
352	1	0	1	1	1	0.826612903	0.173387097	0.998371336	0.827260459	0.904797048	0.980289855	0.019710145	0.901463415	0.899707887	0.900584795
352	1	0	1	1	1	0.826612903	0.173387097	0.998371336	0.827260459	0.904797048	0.980289855	0.019710145	0.901463415	0.899707887	0.900584795
352	1	0	1	1	1	0.826612903	0.173387097	0.998371336	0.827260459	0.904797048	0.980289855	0.019710145	0.901463415	0.899707887	0.900584795
352	1	0	1	1	1	0.826612903	0.173387097	0.998371336	0.827260459	0.904797048	0.980289855	0.019710145	0.901463415	0.899707887	0.900584795
352	1	0	1	1	1	0.826612903	0.173387097	0.998371336	0.827260459	0.904797048	0.980289855	0.019710145	0.901463415	0.899707887	0.900584795
352	1	0	1	1	1	0.826612903	0.173387097	0.998371336	0.827260459	0.904797048	0.980289855	0.019710145	0.901463415	0.899707887	0.900584795
352	1	0	1	1	1	0.826612903	0.173387097	0.998371336	0.827260459	0.904797048	0.980289855	0.019710145	0.901463415	0.899707887	0.900584795
352	1	0	1	1	1	0.826612903	0.173387097	0.998371336	0.827260459	0.904797048	0.980289855	0.019710145	0.901463415	0.899707887	0.900584795
352	1	0	1	1	1	0.826612903	0.173387097	0.998371336	0.827260459	0.904797048	0.980289855	0.019710145	0.901463415	0.899707887	0.900584795
352	1	0	1	1	1	0.826612903	0.173387097	0.998371336	0.827260459	0.904797048	0.980289855	0.019710145	0.901463415	0.899707887	0.900584795
352	1	0	1	1	1	0.826612903	0.173387097	0.998371336	0.827260459	0.904797048	0.980289855	0.019710145	0.901463415	0.899707887	0.900584795
352	1	0	1	1	1	0.826612903	0.173387097	0.998371336	0.827260459	0.904797048	0.980289855	0.019710145	0.901463415	0.899707887	0.900584795
352	1	0	1	1	1	0.826612903	0.173387097	0.998371336	0.827260459	0.904797048	0.980289855	0.019710145	0.901463415	0.899707887	0.900584795
352	1	0	1	1	1	0.826612903	0.173387097	0.998371336	0.827260459	0.904797048	0.980289855	0.019710145	0.901463415	0.899707887	0.900584795
352	1	0	1	1	1	0.826612903	0.173387097	0.998371336	0.827260459	0.904797048	0.980289855	0.019710145	0.901463415	0.899707887	0.900584795
352	1	0	1	1	1	0.826612903	0.173387097	0.998371336	0.827260459	0.904797048	0.980289855	0.019710145	0.901463415	0.899707887	0.900584795
352	1	0	1	1	1	0.826612903	0.173387097	0.998371336	0.827260459	0.904797048	0.980289855	0.019710145	0.901463415	0.899707887	0.900584795
352	1	0	1	1	1	0.826612903	0.173387097	0.998371336	0.827260459	0.904797048	0.980289855	0.019710145	0.901463415	0.899707887	0.900584795
352	1	0	1	1	1	0.826612903	0.173387097	0.998371336	0.827260459	0.904797048	0.980289855	0.019710145	0.901463415	0.899707887	0.900584795
352	1	0	1	1	1	0.826612903	0.173387097	0.998371336	0.827260459	0.904797048	0.980289855	0.019710145	0.901463415	0.899707887	0.900584795
352	1	0	1	1	1	0.826612903	0.173387097	0.998371336	0.827260459	0.904797048	0.980289855	0.019710145	0.901463415	0.899707887	0.900584795
352	1	0	1	1	1	0.826612903	0.173387097	0.998371336	0.827260459	0.904797048	0.980289855	0.019710145	0.901463415	0.899707887	0.900584795
352	1	0	1	1	1	0.826612903	0.173387097	0.998371336	0.827260459	0.904797048	0.980289855	0.019710145	0.901463415	0.899707887	0.900584795
352	1	0	1	1	1	0.826612903	0.173387097	0.998371336	0.827260459	0.904797048	0.980289855	0.019710145	0.901463415	0.899707887	0.900584795
352	1	0	1	1	1	0.826612903	0.173387097	0.998371336	0.827260459	0.904797048	0.980289855	0.019710145	0.901463415	0.899707887	0.900584795
352	1	0	1	1	1	0.826612903	0.173387097	0.998371336	0.827260459	0.904797048	0.980289855	0.019710145	0.901463415	0.899707887	0.900584795
352	1	0	1	1	1	0.826612903	0.173387097	0.998371336	0.827260459	0.904797048	0.980289855	0.019710145	0.901463415	0.899707887	0.900584795
352	1	0	1	1	1	0.826612903	0.173387097	0.998371336	0.827260459	0.904797048	0.980289855	0.019710145	0.901463415	0.899707887	0.900584795
352	1	0	1	1	1	0.826612903	0.173387097	0.998371336	0.827260459	0.904797048	0.980289855	0.019710145	0.901463415	0.899707887	0.900584795
352	1	0	1	1	1	0.826612903	0.173387097	0.998371336	0.827260459	0.904797048	0.980289855	0.019710145	0.901463415	0.899707887	0.900584795
352	1	0	1	1	1	0.826612903	0.173387097	0.998371336	0.827260459	0.904797048	0.980289855	0.019710145	0.901463415	0.899707887	0.900584795
352	1	0	1	1	1	0.826612903	0.173387097	0.998371336	0.827260459	0.904797048	0.980289855	0.019710145	0.901463415	0.899707887	0.900584795
352	1	0	1	1	1	0.826612903	0.173387097	0.998371336	0.827260459	0.904797048	0.980289855	0.019710145	0.901463415	0.899707887	0.900584795
352	1	0	1	1	1	0.826612903	0.173387097	0.998371336	0.827260459	0.904797048	0.980289855	0.019710145	0.901463415	0.899707887	0.900584795
352	1	0	1	1	1	0.826612903	0.173387097	0.998371336	0.827260459	0.904797048	0.980289855	0.019710145	0.901463415	0.899707887	0.900584795
352	1	0	1	1	1	0.826612903	0.173387097	0.998371336	0.827260459	0.904797048	0.980289855	0.019710145	0.901463415	0.899707887	0.900584795
352	1	0	1	1	1	0.826612903	0.173387097	0.998371336	0.827260459	0.904797048	0.980289855	0.019710145	0.901463415	0.899707887	0.900584795
352	1	0	1	1	1	0.826612903	0.173387097	0.998371336	0.827260459	0.904797048	0.980289855	0.019710145	0.901463415	0.899707887	0.900584795
352	1	0	1	1	1	0.826612903	0.173387097	0.998371336	0.827260459	0.904797048	0.980289855	0.019710145	0.901463415	0.899707887	0.900584795
352	1	0	1	1	1	0.826612903	0.173387097	0.998371336	0.827260459	0.904797048	0.980289855	0.019710145	0.901463415	0.899707887	0.900584795
352	1	0	1	1	1	0.826612903	0.173387097	0.998371336	0.827260459	0.904797048	0.980289855	0.019710145	0.901463415	0.899707887	0.900584795
352	1	0	1	1	1	0.826612903	0.173387097	0.998371336	0.827260459	0.904797048	0.980289855	0.019710145	0.901463415	0.899707887	0.900584795
352	1	0	1	1	1	0.826612903	0.173387097	0.998371336	0.827260459	0.904797048	0.980289855	0.019710145	0.901463415	0.899707887	0.900584795
352	1	0	1	1	1	0.826612903	0.173387097	0.998371336	0.827260459	0.904797048	0.980289855	0.019710145	0.901463415	0.899707887	0.900584795
352	1	0	1	1	1	0.826612903	0.173387097	0.998371336	0.827260459	0.904797048	0.980289855	0.019710145	0.901463415	0.899707887	0.900584795
352	1	0	1	1	1	0.826612903	0.173387097	0.998371336	0.827260459	0.904797048	0.980289855	0.019710145	0.901463415	0.899707887	0.900584795
352	1	0	1	1	1	0.826612903	0.173387097	0.998371336	0.827260459	0.904797048	0.980289855	0.019710145	0.901463415	0.899707887	0.900584795
352	1	0	1	1	1	0.826612903	0.173387097	0.998371336	0.827260459	0.904797048	0.980289855	0.019710145	0.901463415	0.899707887	0.900584795
352	1	0	1	1	1	0.826612903	0.173387097	0.998371336	0.827260459	0.904797048	0.980289855	0.019710145	0.901463415	0.899707887	0.900584795
352	1	0	1	1	1	0.826612903	0.173387097	0.998371336	0.827260459	0.904797048	0.980289855	0.019710145	0.901463415	0.899707887	0.900584795
352	1	0	1	1	1	0.826612903	0.173387097	0.998371336	0.827260459	0.904797048	0.980289855	0.019710145	0.901463415	0.899707887	0.900584795
352	1	0	1	1	1	0.826612903	0.173387097	0.998371336	0.827260459	0.904797048	0.980289855	0.019710145	0.901463415	0.899707887	0.900584795
352	1	0	1	1	1	0.826612903	0.173387097	0.998371336	0.827260459	0.904797048	0.980289855	0.019710145	0.901463415	0.899707887	0.900584795
352	1	0	1	1	1	0.826612903	0.173387097	0.998371336	0.827260459	0.904797048	0.980289855	0.019710145	0.901463415	0.899707887	0.900584795
352	1	0	1	1	1	0.826612903	0.173387097	0.998371336	0.827260459	0.904797048	0.980289855	0.019710145	0.901463415	0.899707887	0.900584795
352	1	0	1	1	1	0.826612903	0.173387097	0.998371336	0.827260459	0.904797048	0.980289855	0.019710145	0.901463415	0.899707887	0.900584795
352	1	0	1	1	1	0.826612903	0.173387097	0.998371336	0.827260459	0.904797048	0.980289855	0.019710145	0.901463415	0.899707887	0.900584795
352	1	0	1	1	1	0.826612903	0.173387097	0.998371336	0.827260459	0.904797048	0.980289855	0.019710145	0.901463415	0.899707887	0.900584795
352	1	0	1	1	1	0.826612903	0.173387097	0.998371336	0.827260459	0.904797048	0.980289855	0.019710145	0.901463415	0.899707887	0.900584795
352	1	0	1	1	1	0.826612903	0.173387097	0.998371336	0.827260459	0.904797048	0.980289855	0.019710145	0.901463415	0.899707887	0.900584795
352	1	0	1	1	1	0.826612903	0.173387097	0.998371336	0.827260459	0.904797048	0.980289855	0.019710145	0.901463415	0.899707887	0.900584795
352	1	0	1	1	1	0.826612903	0.173387097	0.998371336	0.827260459	0.904797048	0.980289855	0.019710145	0.901463415	0.899707887	0.900584795
352	1	0	1	1	1	0.826612903	0.173387097	0.998371336	0.827260459	0.904797048	0.980289855	0.019710145	0.901463415	0.899707887	0.900584795
352	1	0	1	1	1	0.826612903	0.173387097	0.998371336	0.827260459	0.904797048	0.980289855	0.019710145	0.901463415	0.899707887	0.900584795
352	1	0	1	1	1	0.826612903	0.173387097	0.998371336	0.827260459	0.904797048	0.980289855	0.019710145	0.901463415	0.899707887	0.900584795
352	1	0	1	1	1	0.826612903	0.173387097	0.998371336	0.827260459	0.904797048	0.980289855	0.019710145	0.901463415	0.899707887	0.900584795
352	1	0	1	1	1	0.826612903	0.173387097	0.998371336	0.827260459	0.904797048	0.980289855	0.019710145	0.901463415	0.899707887	0.900584795
352	1	0	1	1	1	0.826612903	0.173387097	0.998371336	0.827260459	0.904797048	0.980289855	0.019710145	0.901463415	0.899707887	0.900584795
352	1	0	1	1	1	0.826612903	0.173387097	0.998371336	0.827260459	0.904797048	0.980289855	0.019710145	0.901463415	0.899707887	0.900584795
352	1	0	1	1	1	0.826612903	0.173387097	0.998371336	0.827260459	0.904797048	0.980289855	0.019710145	0.901463415	0.899707887	0.900584795
352	1	0	1	1	1	0.826612903	0.173387097	0.998371336	0.827260459	0.904797048	0.980289855	0.019710145	0.901463415	0.899707887	0.900584795
352	1	0	1	1	1	0.826612903	0.173387097	0.998371336	0.827260459	0.904797048	0.980289855	0.019710145	0.901463415	0.899707887	0.900584795
352	1	0	1	1	1	0.826612903	0.173387097	0.998371336	0.827260459	0.904797048	0.980289855	0.019710145	0.901463415	0.899707887	0.900584795
352	1	0	1	1	1	0.826612903	0.173387097	0.998371336	0.827260459	0.904797048	0.980289855	0.019710145	0.901463415	0.899707887	0.900584795
352	1	0	1	1	1	0.826612903	0.173387097	0.998371336	0.827260459	0.904797048	0.980289855	0.019710145	0.901463415	0.899707887	0.900584795
352	1	0	1	1	1	0.826612903	0.173387097	0.998371336	0.827260459	0.904797048	0.980289855	0.019710145	0.901463415	0.899707887	0.900584795
352	1	0	1	1	1	0.826612903	0.173387097	0.998371336	0.827260459	0.904797048	0.980289855	0.019710145	0.901463415	0.899707887	0.900584795
352	1	0	1	1	1	0.826612903	0.173387097	0.998371336	0.827260459	0.904797048	0.980289855	0.019710145	0.901463415	0.899707887	0.900584795
352	1	0	1	1	1	0.826612903	0.173387097	0.998371336	0.827260459	0.904797048	0.980289855	0.019710145	0.901463415	0.899707887	0.900584795
352	1	0	1	1	1	0.826612903	0.173387097	0.998371336	0.827260459	0.904797048	0.980289855	0.019710145	0.901463415	0.899707887	0.900584795
352	1	0	1	1	1	0.826612903	0.173387097	0.998371336	0.827260459	0.904797048	0.980289855	0.019710145	0.901463415	0.899707887	0.900584795
352	1	0	1	1	1	0.826612903	0.173387097	0.998371336	0.827260459	0.904797048	0.980289855	0.019710145	0.901463415	0.899707887	0.900584795
352	1	0	1	1	1	0.826612903	0.173387097	0.998371336	0.827260459	0.904797048	0.980289855	0.019710145	0.901463415	0.899707887	0.900584795
352	1	0	1	1	1	0.826612903	0.173387097	0.998371336	0.827260459	0.904797048	0.980289855	0.019710145	0.901463415	0.899707887	0.900584795
352	1	0	1	1	1	0.826612903	0.173387097	0.998371336	0.827260459	0.904797048	0.980289855	0.019710145	0.901463415	0.899707887	0.900584795
352	1	0	1	1	1	0.826612903	0.173387097	0.998371336	0.827260459	0.904797048	0.980289855	0.019710145	0.901463415	0.899707887	0.900584795
352	1	0	1	1	1	0.826612903	0.173387097	0.998371336	0.827260459	0.904797048	0.980289855	0.019710145	0.901463415	0.899707887	0.900584795
352	1	0	1	1	1	0.826612903	0.173387097	0.998371336	0.827260459	0.904797048	0.980289855	0.019710145	0.901463415	0.899707887	0.900584795
352	1	0	1	1	1	0.826612903	0.173387097	0.998371336	0.827260459	0.904797048	0.980289855	0.019710145	0.901463415	0.899707887	0.900584795
352	1	0	1	1	1	0.826612903	0.173387097	0.998371336	0.827260459	0.904797048	0.980289855	0.019710145	0.901463415	0.899707887	0.900584795
352	1	0	1	1	1	0.826612903	0.173387097	0.998371336	0.827260459	0.904797048	0.980289855	0.019710145	0.901463415	0.899707887	0.900584795
352	1	0	1	1	1	0.826612903	0.173387097	0.998371336	0.827260459	0.904797048	0.980289855	0.019710145	0.901463415	0.899707887	0.900584795
352	1	0	1	1	1	0.826612903	0.173387097	0.998371336	0.827260459	0.904797048	0.980289855	0.019710145	0.901463415	0.899707887	0.900584795
352	1	0	1	1	1	0.826612903	0.173387097	0.998371336	0.827260459	0.904797048	0.980289855	0.019710145	0.901463415	0.899707887	0.900584795
352	1	0	1	1	1	0.826612903	0.173387097	0.998371336	0.827260459	0.904797048	0.980289855	0.019710145	0.901463415	0.899707887	0.900584795
352	1	0	1	1	1	0.826612903	0.173387097	0.998371336	0.827260459	0.904797048	0.980289855	0.019710145	0.901463415	0.899707887	0.900584795
352	1	0	1	1	1	0.826612903	0.173387097	0.998371336	0.827260459	0.904797048	0.980289855	0.019710145	0.901463415	0.899707887	0.900584795
352	1	0	1	1	1	0.826612903	0.173387097	0.998371336	0.827260459	0.904797048	0.980289855	0.019710145	0.901463415	0.899707887	0.900584795
352	1	0	1	1	1	0.826612903	0.173387097	0.998371336	0.827260459	0.904797048	0.980289855	0.019710145	0.901463415	0.899707887	0.900584795
352	1	0	1	1	1	0.826612903	0.173387097	0.998371336	0.827260459	0.904797048	0.980289855	0.019710145	0.901463415	0.899707887	0.900584795
352	1	0	1	1	1	0.826612903	0.173387097	0.998371336	0.827260459	0.904797048	0.980289855	0.019710145	0.901463415	0.899707887	0.900584795
352	1	0	1	1	1	0.826612903	0.173387097	0.998371336	0.827260459	0.904797048	0.980289855	0.019710145	0.901463415	0.899707887	0.900584795
352	1	0	1	1	1	0.826612903	0.173387097	0.998371336	0.827260459	0.904797048	0.980289855	0.019710145	0.901463415	0.899707887	0.900584795
352	1	0	1	1	1	0.826612903	0.173387097	0.998371336	0.827260459	0.904797048	0.980289855	0.019710145	0.901463415	0.899707887	0.900584795
352	1	0	1	1	1	0.826612903	0.173387097	0.998371336	0.827260459	0.904797048	0.980289855	0.019710145	0.901463415	0.899707887	0.900584795
352	1	0	1	1	1	0.826612903	0.173387097	0.998371336	0.827260459	0.904797048	0.980289855	0.019710145	0.901463415	0.899707887	0.900584795
352	1	0	1	1	1	0.826612903	0.173387097	0.998371336	0.827260459	0.904797048	0.980289855	0.019710145	0.901463415	0.899707887	0.900584795
352	1	0	1	1	1	0.826612903	0.173387097	0.998371336	0.827260459	0.904797048	0.980289855	0.019710145	0.901463415	0.899707887	0.900584795
352	1	0	1	1	1	0.826612903	0.173387097	0.998371336	0.827260459	0.904797048	0.980289855	0.019710145	0.901463415	0.899707887	0.900584795
352	1	0	1	1	1	0.826612903	0.173387097	0.998371336	0.827260459	0.904797048	0.980289855	0.019710145	0.901463415	0.899707887	0.900584795
352	1	0	1	1	1	0.826612903	0.173387097	0.998371336	0.827260459	0.904797048	0.980289855	0.019710145	0.901463415	0.899707887	0.900584795
352	1	0	1	1	1	0.826612903	0.173387097	0.998371336	0.827260459	0.904797048	0.980289855	0.019710145	0.901463415	0.899707887	0.900584795
352	1	0	1	1	1	0.826612903	0.173387097	0.998371336	0.827260459	0.904797048	0.980289855	0.019710145	0.901463415	0.899707887	0.900584795
352	1	0	1	1	1	0.826612903	0.173387097	0.998371336	0.827260459	0.904797048	0.980289855	0.019710145	0.901463415	0.899707887	0.900584795
352	1	0	1	1	1	0.826612903	0.173387097	0.998371336	0.827260459	0.904797048	0.980289855	0.019710145	0.901463415	0.899707887	0.900584795
352	1	0	1	1	1	0.826612903	0.173387097	0.998371336	0.827260459	0.904797048	0.980289855	0.019710145	0.901463415	0.899707887	0.900584795
352	1	0	1	1	1	0.826612903	0.173387097	0.998371336	0.827260459	0.904797048	0.980289855	0.019710145	0.901463415	0.899707887	0.900584795
352	1	0	1	1	1	0.826612903	0.173387097	0.998371336	0.827260459	0.904797048	0.980289855	0.019710145	0.901463415	0.899707887	0.900584795
352	1	0	1	1	1	0.826612903	0.173387097	0.998371336	0.827260459	0.904797048	0.980289855	0.019710145	0.901463415	0.899707887	0.900584795
352	1	0	1	1	1	0.826612903	0.173387097	0.998371336	0.827260459	0.904797048	0.980289855	0.019710145	0.901463415	0.899707887	0.900584795
352	1	0	1	1	1	0.826612903	0.173387097	0.998371336	0.827260459	0.904797048	0.980289855	0.019710145	0.901463415	0.899707887	0.900584795
352	1	0	1	1	1	0.826612903	0.173387097	0.998371336	0.827260459	0.904797048	0.980289855	0.019710145	0.901463415	0.899707887	0.900584795
352	1	0	1	1	1	0.826612903	0.173387097	0.998371336	0.827260459	0.904797048	0.980289855	0.019710145	0.901463415	0.899707887	0.900584795
352	1	0	1	1	1	0.826612903	0.173387097	0.998371336	0.827260459	0.904797048	0.980289855	0.019710145	0.901463415	0.899707887	0.900584795
352	1	0	1	1	1	0.826612903	0.173387097	0.998371336	0.827260459	0.904797048	0.980289855	0.019710145	0.901463415	0.899707887	0.900584795
352	1	0	1	1	1	0.826612903	0.173387097	0.998371336	0.827260459	0.904797048	0.980289855	0.019710145	0.901463415	0.899707887	0.900584795
352	1	0	1	1	1	0.826612903	0.173387097	0.998371336	0.827260459	0.904797048	0.980289855	0.019710145	0.901463415	0.899707887	0.900584795
352	1	0	1	1	1	0.826612903	0.173387097	0.998371336	0.827260459	0.904797048	0.980289855	0.019710145	0.901463415	0.899707887	0.900584795
352	1	0	1	1	1	0.826612903	0.173387097	0.998371336	0.827260459	0.904797048	0.980289855	0.019710145	0.901463415	0.899707887	0.900584795
352	1	0	1	1	1	0.826612903	0.173387097	0.998371336	0.827260459	0.904797048	0.980289855	0.019710145	0.901463415	0.899707887	0.900584795
352	1	0	1	1	1	0.826612903	0.173387097	0.998371336	0.827260459	0.904797048	0.980289855	0.019710145	0.901463415	0.899707887	0.900584795
352	1	0	1	1	1	0.826612903	0.173387097	0.998371336	0.827260459	0.904797048	0.980289855	0.019710145	0.901463415	0.899707887	0.900584795
352	1	0	1	1	1	0.826612903	0.173387097	0.998371336	0.827260459	0.904797048	0.980289855	0.019710145	0.901463415	0.899707887	0.900584795
352	1	0	1	1	1	0.826612903	0.173387097	0.998371336	0.827260459	0.904797048	0.980289855	0.019710145	0.901463415	0.899707887	0.900584795
352	1	0	1	1	1	0.826612903	0.173387097	0.998371336	0.827260459	0.904797048	0.980289855	0.019710145	0.901463415	0.899707887	0.900584795
352	1	0	1	1	1	0.826612903	0.173387097	0.998371336	0.827260459	0.904797048	0.980289855	0.019710145	0.901463415	0.899707887	0.900584795
352	1	0	1	1	1	0.826612903	0.173387097	0.998371336	0.827260459	0.904797048	0.980289855	0.019710145	0.901463415	0.899707887	0.900584795
352	1	0	1	1	1	0.826612903	0.173387097	0.998371336	0.827260459	0.904797048	0.980289855	0.019710145	0.901463415	0.899707887	0.900584795
352	1	0	1	1	1	0.826612903	0.173387097	0.998371336	0.827260459	0.904797048	0.980289855	0.019710145	0.901463415	0.899707887	0.900584795
352	1	0	1	1	1	0.826612903	0.173387097	0.998371336	0.827260459	0.904797048	0.980289855	0.019710145	0.901463415	0.899707887	0.900584795
352	1	0	1	1	1	0.826612903	0.173387097	0.998371336	0.827260459	0.904797048	0.980289855	0.019710145	0.901463415	0.899707887	0.900584795
352	1	0	1	1	1	0.826612903	0.173387097	0.998371336	0.827260459	0.904797048	0.980289855	0.019710145	0.901463415	0.899707887	0.900584795
352	1	0	1	1	1	0.826612903	0.173387097	0.998371336	0.827260459	0.904797048	0.980289855	0.019710145	0.901463415	0.899707887	0.900584795
352	1	0	1	1	1	0.826612903	0.173387097	0.998371336	0.827260459	0.904797048	0.980289855	0.019710145	0.901463415	0.899707887	0.900584795
352	1	0	1	1	1	0.826612903	0.173387097	0.998371336	0.827260459	0.904797048	0.980289855	0.019710145	0.901463415	0.899707887	0.900584795
352	1	0	1	1	1	0.826612903	0.173387097	0.998371336	0.827260459	0.904797048	0.980289855	0.019710145	0.901463415	0.899707887	0.900584795
352	1	0	1	1	1	0.826612903	0.173387097	0.998371336	0.827260459	0.904797048	0.980289855	0.019710145	0.901463415	0.899707887	0.900584795
352	1	0	1	1	1	0.826612903	0.173387097	0.998371336	0.827260459	0.904797048	0.980289855	0.019710145	0.901463415	0.899707887	0.900584795
352	1	0	1	1	1	0.826612903	0.173387097	0.998371336	0.827260459	0.904797048	0.980289855	0.019710145	0.901463415	0.899707887	0.900584795
352	1	0	1	1	1	0.826612903	0.173387097	0.998371336	0.827260459	0.904797048	0.980289855	0.019710145	0.901463415	0.899707887	0.900584795
352	1	0	1	1	1	0.826612903	0.173387097	0.998371336	0.827260459	0.904797048	0.980289855	0.019710145	0.901463415	0.899707887	0.900584795
352	1	0	1	1	1	0.826612903	0.173387097	0.998371336	0.827260459	0.904797048	0.980289855	0.019710145	0.901463415	0.899707887	0.900584795
352	1	0	1	1	1	0.826612903	0.173387097	0.998371336	0.827260459	0.904797048	0.980289855	0.019710145	0.901463415	0.899707887	0.900584795
352	1	0	1	1	1	0.826612903	0.173387097	0.998371336	0.827260459	0.904797048	0.980289855	0.019710145	0.901463415	0.899707887	0.900584795
352	1	0	1	1	1	0.826612903	0.173387097	0.998371336	0.827260459	0.904797048	0.980289855	0.019710145	0.901463415	0.899707887	0.900584795
352	1	0	1	1	1	0.826612903	0.173387097	0.998371336	0.827260459	0.904797048	0.980289855	0.019710145	0.901463415	0.899707887	0.900584795
352	1	0	1	1	1	0.826612903	0.173387097	0.998371336	0.827260459	0.904797048	0.980289855	0.019710145	0.901463415	0.899707887	0.900584795
352	1	0	1	1	1	0.826612903	0.173387097	0.998371336	0.827260459	0.904797048	0.980289855	0.019710145	0.901463415	0.899707887	0.900584795
352	1	0	1	1	1	0.826612903	0.173387097	0.998371336	0.827260459	0.904797048	0.980289855	0.019710145	0.901463415	0.899707887	0.900584795
352	1	0	1	1	1	0.826612903	0.173387097	0.998371336	0.827260459	0.904797048	0.980289855	0.019710145	0.901463415	0.899707887	0.900584795
352	1	0	1	1	1	0.826612903	0.173387097	0.998371336	0.827260459	0.904797048	0.980289855	0.019710145	0.901463415	0.899707887	0.900584795
352	1	0	1	1	1	0.826612903	0.173387097	0.998371336	0.827260459	0.904797048	0.980289855	0.019710145	0.901463415	0.899707887	0.900584795
352	1	0	1	1	1	0.826612903	0.173387097	0.998371336	0.827260459	0.904797048	0.980289855	0.019710145	0.901463415	0.899707887	0.900584795
352	1	0	1	1	1	0.826612903	0.173387097	0.998371336	0.827260459	0.904797048	0.980289855	0.019710145	0.901463415	0.899707887	0.900584795
352	1	0	1	1	1	0.826612903	0.173387097	0.998371336	0.827260459	0.904797048	0.980289855	0.019710145	0.901463415	0.899707887	0.900584795
352	1	0	1	1	1	0.826612903	0.173387097	0.998371336	0.827260459	0.904797048	0.980289855	0.019710145	0.901463415	0.899707887	0.900584795
352	1	0	1	1	1	0.826612903	0.173387097	0.998371336	0.827260459	0.904797048	0.980289855	0.019710145	0.901463415	0.899707887	0.900584795
352	1	0	1	1	1	0.826612903	0.173387097	0.998371336	0.827260459	0.904797048	0.980289855	0.019710145	0.901463415	0.899707887	0.900584795
352	1	0	1	1	1	0.826612903	0.173387097	0.998371336	0.827260459	0.904797048	0.980289855	0.019710145	0.901463415	0.899707887	0.900584795
352	1	0	1	1	1	0.826612903	0.173387097	0.998371336	0.827260459	0.904797048	0.980289855	0.019710145	0.901463415	0.899707887	0.900584795
352	1	0	1	1	1	0.826612903	0.173387097	0.998371336	0.827260459	0.904797048	0.980289855	0.019710145	0.901463415	0.899707887	0.900584795
352	1	0	1	1	1	0.826612903	0.173387097	0.998371336	0.827260459	0.904797048	0.980289855	0.019710145	0.901463415	0.899707887	0.900584795
352	1	0	1	1	1	0.826612903	0.173387097	0.998371336	0.827260459	0.904797048	0.980289855	0.019710145	0.901463415	0.899707887	0.900584795
352	1	0	1	1	1	0.826612903	0.173387097	0.998371336	0.827260459	0.904797048	0.980289855	0.019710145	0.901463415	0.899707887	0.900584795
352	1	0	1	1	1	0.826612903	0.173387097	0.998371336	0.827260459	0.904797048	0.980289855	0.019710145	0.901463415	0.899707887	0.900584795
352	1	0	1	1	1	0.826612903	0.173387097	0.998371336	0.827260459	0.904797048	0.980289855	0.019710145	0.901463415	0.899707887	0.900584795
352	1	0	1	1	1	0.826612903	0.173387097	0.998371336	0.827260459	0.904797048	0.980289855	0.019710145	0.901463415	0.899707887	0.900584795
352	1	0	1	1	1	0.826612903	0.173387097	0.998371336	0.827260459	0.904797048	0.980289855	0.019710145	0.901463415	0.899707887	0.900584795
352	1	0	1	1	1	0.826612903	0.173387097	0.998371336	0.827260459	0.904797048	0.980289855	0.019710145	0.901463415	0.899707887	0.900584795
352	1	0	1	1	1	0.826612903	0.173387097	0.998371336	0.827260459	0.904797048	0.980289855	0.019710145	0.901463415	0.899707887	0.900584795
352	1	0	1	1	1	0.826612903	0.173387097	0.998371336	0.827260459	0.904797048	0.980289855	0.019710145	0.901463415	0.899707887	0.900584795
352	1	0	1	1	1	0.826612903	0.173387097	0.998371336	0.827260459	0.904797048	0.980289855	0.019710145	0.901463415	0.899707887	0.900584795
352	1	0	1	1	1	0.826612903	0.173387097	0.998371336	0.827260459	0.904797048	0.980289855	0.019710145	0.901463415	0.899707887	0.900584795
352	1	0	1	1	1	0.826612903	0.173387097	0.998371336	0.827260459	0.904797048	0.980289855	0.019710145	0.901463415	0.899707887	0.900584795
352	1	0	1	1	1	0.826612903	0.173387097	0.998371336	0.827260459	0.904797048	0.980289855	0.019710145	0.901463415	0.899707887	0.900584795
352	1	0	1	1	1	0.826612903	0.173387097	0.998371336	0.827260459	0.904797048	0.980289855	0.019710145	0.901463415	0.899707887	0.900584795
352	1	0	1	1	1	0.826612903	0.173387097	0.998371336	0.827260459	0.904797048	0.980289855	0.019710145	0.901463415	0.899707887	0.900584795
352	1	0	1	1	1	0.826612903	0.173387097	0.998371336	0.827260459	0.904797048	0.980289855	0.019710145	0.901463415	0.899707887	0.900584795
352	1	0	1	1	1	0.826612903	0.173387097	0.998371336	0.827260459	0.904797048	0.980289855	0.019710145	0.901463415	0.899707887	0.900584795
352	1	0	1	1	1	0.826612903	0.173387097	0.998371336	0.827260459	0.904797048	0.980289855	0.019710145	0.901463415	0.899707887	0.900584795
352	1	0	1	1	1	0.826612903	0.173387097	0.998371336	0.827260459	0.904797048	0.980289855	0.019710145	0.901463415	0.899707887	0.900584795
352	1	0	1	1	1	0.826612903	0.173387097	0.998371336	0.827260459	0.904797048	0.980289855	0.019710145	0.901463415	0.899707887	0.900584795
352	1	0	1	1	1	0.826612903	0.173387097	0.998371336	0.827260459	0.904797048	0.980289855	0.019710145	0.901463415	0.899707887	0.900584795
352	1	0	1	1	1	0.826612903	0.173387097	0.998371336	0.827260459	0.904797048	0.980289855	0.019710145	0.901463415	0.899707887	0.900584795
352	1	0	1	1	1	0.826612903	0.173387097	0.998371336	0.827260459	0.904797048	0.980289855	0.019710145	0.901463415	0.899707887	0.900584795
352	1	0	1	1	1	0.826612903	0.173387097	0.998371336	0.827260459	0.904797048	0.980289855	0.019710145	0.901463415	0.899707887	0.900584795
352	1	0	1	1	1	0.826612903	0.173387097	0.998371336	0.827260459	0.904797048	0.980289855	0.019710145	0.901463415	0.899707887	0.900584795
352	1	0	1	1	1	0.826612903	0.173387097	0.998371336	0.827260459	0.904797048	0.980289855	0.019710145	0.901463415	0.899707887	0.900584795
352	1	0	1	1	1	0.826612903	0.173387097	0.998371336	0.827260459	0.904797048	0.980289855	0.019710145	0.901463415	0.899707887	0.900584795
352	1	0	1	1	1	0.826612903	0.173387097	0.998371336	0.827260459	0.904797048	0.980289855	0.019710145	0.901463415	0.899707887	0.900584795
352	1	0	1	1	1	0.826612903	0.173387097	0.998371336	0.827260459	0.904797048	0.980289855	0.019710145	0.901463415	0.899707887	0.900584795
352	1	0	1	1	1	0.826612903	0.173387097	0.998371336	0.827260459	0.904797048	0.980289855	0.019710145	0.901463415	0.899707887	0.900584795
352	1	0	1	1	1	0.826612903	0.173387097	0.998371336	0.827260459	0.904797048	0.980289855	0.019710145	0.901463415	0.899707887	0.900584795
352	1	0	1	1	1	0.826612903	0.173387097	0.998371336	0.827260459	0.904797048	0.980289855	0.019710145	0.901463415	0.899707887	0.900584795
352	1	0	1	1	1	0.826612903	0.173387097	0.998371336	0.827260459	0.904797048	0.980289855	0.019710145	0.901463415	0.899707887	0.900584795
352	1	0	1	1	1	0.826612903	0.173387097	0.998371336	0.827260459	0.904797048	0.980289855	0.019710145	0.901463415	0.899707887	0.900584795
352	1	0	1	1	1	0.826612903	0.173387097	0.998371336	0.827260459	0.904797048	0.980289855	0.019710145	0.901463415	0.899707887	0.900584795
352	1	0	1	1	1	0.826612903	0.173387097	0.998371336	0.827260459	0.904797048	0.980289855	0.019710145	0.901463415	0.899707887	0.900584795
352	1	0	1	1	1	0.826612903	0.173387097	0.998371336	0.827260459	0.904797048	0.980289855	0.019710145	0.901463415	0.899707887	0.900584795
352	1	0	1	1	1	0.826612903	0.173387097	0.998371336	0.827260459	0.904797048	0.980289855	0.019710145	0.901463415	0.899707887	0.900584795
352	1	0	1	1	1	0.826612903	0.173387097	0.998371336	0.827260459	0.904797048	0.980289855	0.019710145	0.901463415	0.899707887	0.900584795
352	1	0	1	1	1	0.826612903	0.173387097	0.998371336	0.827260459	0.904797048	0.980289855	0.019710145	0.901463415	0.899707887	0.900584795
352	1	0	1	1	1	0.826612903	0.173387097	0.998371336	0.827260459	0.904797048	0.980289855	0.019710145	0.901463415	0.899707887	0.900584795
352	1	0	1	1	1	0.826612903	0.173387097	0.998371336	0.827260459	0.904797048	0.980289855	0.019710145	0.901463415	0.899707887	0.900584795
352	1	0	1	1	1	0.826612903	0.173387097	0.998371336	0.827260459	0.904797048	0.980289855	0.019710145	0.901463415	0.899707887	0.900584795
352	1	0	1	1	1	0.826612903	0.173387097	0.998371336	0.827260459	0.904797048	0.980289855	0.019710145	0.901463415	0.899707887	0.900584795
352	1	0	1	1	1	0.826612903	0.173387097	0.998371336	0.827260459	0.904797048	0.980289855	0.019710145	0.901463415	0.899707887	0.900584795
352	1	0	1	1	1	0.826612903	0.173387097	0.998371336	0.827260459	0.904797048	0.980289855	0.019710145	0.901463415	0.899707887	0.900584795
352	1	0	1	1	1	0.826612903	0.173387097	0.998371336	0.827260459	0.904797048	0.980289855	0.019710145	0.901463415	0.899707887	0.900584795
352	1	0	1	1	1	0.826612903	0.173387097	0.998371336	0.827260459	0.904797048	0.980289855	0.019710145	0.901463415	0.899707887	0.900584795
352	1	0	1	1	1	0.826612903	0.173387097	0.998371336	0.827260459	0.904797048	0.980289855	0.019710145	0.901463415	0.899707887	0.900584795
352	1	0	1	1	1	0.826612903	0.173387097	0.998371336	0.827260459	0.904797048	0.980289855	0.019710145	0.901463415	0.899707887	0.900584795
352	1	0	1	1	1	0.826612903	0.173387097	0.998371336	0.827260459	0.904797048	0.980289855	0.019710145	0.901463415	0.899707887	0.900584795
352	1	0	1	1	1	0.826612903	0.173387097	0.998371336	0.827260459	0.904797048	0.980289855	0.019710145	0.901463415	0.899707887	0.900584795
352	1	0	1	1	1	0.826612903	0.173387097	0.998371336	0.827260459	0.904797048	0.980289855	0.019710145	0.901463415	0.899707887	0.900584795
352	1	0	1	1	1	0.826612903	0.173387097	0.998371336	0.827260459	0.904797048	0.980289855	0.019710145	0.901463415	0.899707887	0.900584795
352	1	0	1	1	1	0.826612903	0.173387097	0.998371336	0.827260459	0.904797048	0.980289855	0.019710145	0.901463415	0.899707887	0.900584795
352	1	0	1	1	1	0.826612903	0.173387097	0.998371336	0.827260459	0.904797048	0.980289855	0.019710145	0.901463415	0.899707887	0.900584795
352	1	0	1	1	1	0.826612903	0.173387097	0.998371336	0.827260459	0.904797048	0.980289855	0.019710145	0.901463415	0.899707887	0.900584795
352	1	0	1	1	1	0.826612903	0.173387097	0.998371336	0.827260459	0.904797048	0.980289855	0.019710145	0.901463415	0.899707887	0.900584795
352	1	0	1	1	1	0.826612903	0.173387097	0.998371336	0.827260459	0.904797048	0.980289855	0.019710145	0.901463415	0.899707887	0.900584795
352	1	0	1	1	1	0.826612903	0.173387097	0.998371336	0.827260459	0.904797048	0.980289855	0.019710145	0.901463415	0.899707887	0.900584795
352	1	0	1	1	1	0.826612903	0.173387097	0.998371336	0.827260459	0.904797048	0.980289855	0.019710145	0.901463415	0.899707887	0.900584795
352	1	0	1	1	1	0.826612903	0.173387097	0.998371336	0.827260459	0.904797048	0.980289855	0.019710145	0.901463415	0.899707887	0.900584795
352	1	0	1	1	1	0.826612903	0.173387097	0.998371336	0.827260459	0.904797048	0.980289855	0.019710145	0.901463415	0.899707887	0.900584795
352	1	0	1	1	1	0.826612903	0.173387097	0.998371336	0.827260459	0.904797048	0.980289855	0.019710145	0.901463415	0.899707887	0.900584795
352	1	0	1	1	1	0.826612903	0.173387097	0.998371336	0.827260459	0.904797048	0.980289855	0.019710145	0.901463415	0.899707887	0.900584795
352	1	0	1	1	1	0.826612903	0.173387097	0.998371336	0.827260459	0.904797048	0.980289855	0.019710145	0.901463415	0.899707887	0.900584795
352	1	0	1	1	1	0.826612903	0.173387097	0.998371336	0.827260459	0.904797048	0.980289855	0.019710145	0.901463415	0.899707887	0.900584795
352	1	0	1	1	1	0.826612903	0.173387097	0.998371336	0.827260459	0.904797048	0.980289855	0.019710145	0.901463415	0.899707887	0.900584795
352	1	0	1	1	1	0.826612903	0.173387097	0.998371336	0.827260459	0.904797048	0.980289855	0.019710145	0.901463415	0.899707887	0.900584795
352	1	0	1	1	1	0.826612903	0.173387097	0.998371336	0.827260459	0.904797048	0.980289855	0.019710145	0.901463415	0.899707887	0.900584795
352	1	0	1	1	1	0.826612903	0.173387097	0.998371336	0.827260459	0.904797048	0.980289855	0.019710145	0.901463415	0.899707887	0.900584795
352	1	0	1	1	1	0.826612903	0.173387097	0.998371336	0.827260459	0.904797048	0.980289855	0.019710145	0.901463415	0.899707887	0.900584795
352	1	0	1	1	1	0.826612903	0.173387097	0.998371336	0.827260459	0.904797048	0.980289855	0.019710145	0.901463415	0.899707887	0.900584795
