# Supplementary material for: An Improved Hybrid Feature Selection Algorithm for Electric Charge Recovery Risk
Source: Hindawi journal article supplement (doi:10.1155/2020/8479341), 2020-08-28
Supplement: f1 [file 8479341.f1.zip › 8479341.f1/Experimental Results/201808/HPSO_SSM_results.csv]

features_num	Accuracy_high	Loss_high	Precission_high	Recall_high	F1_high	Accuracy_med	Loss_med	Precission_med	Recall_med	F1_med	Accuracy_low	Loss_low	Precission_low	Recall_low	F1_low
271	1.0	0.0	1.0	1.0	1.0	0.8549450549450549	0.1450549450549451	0.9820742637644048	0.8666666666666667	0.9207683073229292	0.9314783641944748	0.06852163580552527	0.5474910394265233	0.7656641604010025	0.6384535005224661
271	1.0	0.0	1.0	1.0	1.0	0.8549450549450549	0.1450549450549451	0.9820742637644048	0.8666666666666667	0.9207683073229292	0.9314783641944748	0.06852163580552527	0.5474910394265233	0.7656641604010025	0.6384535005224661
271	1.0	0.0	1.0	1.0	1.0	0.8549450549450549	0.1450549450549451	0.9820742637644048	0.8666666666666667	0.9207683073229292	0.9314783641944748	0.06852163580552527	0.5474910394265233	0.7656641604010025	0.6384535005224661
271	1.0	0.0	1.0	1.0	1.0	0.8549450549450549	0.1450549450549451	0.9820742637644048	0.8666666666666667	0.9207683073229292	0.9314783641944748	0.06852163580552527	0.5474910394265233	0.7656641604010025	0.6384535005224661
267	1.0	0.0	1.0	1.0	1.0	0.8715415019762845	0.12845849802371545	0.9875283446712018	0.8797979797979798	0.9305555555555556	0.9246336357292394	0.0753663642707606	0.4895608351331893	0.9353507565337	0.6427221172022684
267	1.0	0.0	1.0	1.0	1.0	0.8715415019762845	0.12845849802371545	0.9875283446712018	0.8797979797979798	0.9305555555555556	0.9246336357292394	0.0753663642707606	0.4895608351331893	0.9353507565337	0.6427221172022684
267	1.0	0.0	1.0	1.0	1.0	0.8715415019762845	0.12845849802371545	0.9875283446712018	0.8797979797979798	0.9305555555555556	0.9246336357292394	0.0753663642707606	0.4895608351331893	0.9353507565337	0.6427221172022684
267	1.0	0.0	1.0	1.0	1.0	0.8715415019762845	0.12845849802371545	0.9875283446712018	0.8797979797979798	0.9305555555555556	0.9246336357292394	0.0753663642707606	0.4895608351331893	0.9353507565337	0.6427221172022684
274	1.0	0.0	1.0	1.0	1.0	0.8568207440811725	0.14317925591882752	0.953846153846154	0.8910179640718563	0.9213622291021673	0.9406654161318984	0.059334583868101524	0.6247544204322201	0.7438596491228069	0.6791243993593166
260	1.0	0.0	1.0	1.0	1.0	0.8984198645598194	0.10158013544018064	0.9659090909090908	0.9239130434782608	0.9444444444444444	0.9361198738170348	0.06388012618296535	0.6059479553903345	0.7442922374429224	0.6680327868852459
258	1.0	0.0	1.0	1.0	1.0	0.8490783410138248	0.15092165898617516	0.997278911564626	0.8503480278422274	0.917971195992486	0.949970685948798	0.050029314051201916	0.6982248520710059	0.774617067833698	0.7344398340248963
274	1.0	0.0	1.0	1.0	1.0	0.8747152619589977	0.12528473804100226	0.9921773142112124	0.8797687861271676	0.932598039215686	0.9498337570897712	0.050166242910228864	0.6988071570576541	0.7699890470974808	0.7326732673267328
280	1.0	0.0	1.0	1.0	1.0	0.8959999999999999	0.10399999999999998	0.992337164750958	0.9013921113689096	0.9446808510638298	0.9500195618153364	0.04998043818466358	0.6941747572815534	0.7848518111964874	0.7367336424523442
280	1.0	0.0	1.0	1.0	1.0	0.8959999999999999	0.10399999999999998	0.992337164750958	0.9013921113689096	0.9446808510638298	0.9500195618153364	0.04998043818466358	0.6941747572815534	0.7848518111964874	0.7367336424523442
280	1.0	0.0	1.0	1.0	1.0	0.8959999999999999	0.10399999999999998	0.992337164750958	0.9013921113689096	0.9446808510638298	0.9500195618153364	0.04998043818466358	0.6941747572815534	0.7848518111964874	0.7367336424523442
280	1.0	0.0	1.0	1.0	1.0	0.8959999999999999	0.10399999999999998	0.992337164750958	0.9013921113689096	0.9446808510638298	0.9500195618153364	0.04998043818466358	0.6941747572815534	0.7848518111964874	0.7367336424523442
278	1.0	0.0	1.0	1.0	1.0	0.8905472636815921	0.1094527363184079	0.9957865168539326	0.8929471032745592	0.9415670650730412	0.955846676370694	0.04415332362930613	0.7763975155279503	0.7583417593528817	0.7672634271099744
278	1.0	0.0	1.0	1.0	1.0	0.8905472636815921	0.1094527363184079	0.9957865168539326	0.8929471032745592	0.9415670650730412	0.955846676370694	0.04415332362930613	0.7763975155279503	0.7583417593528817	0.7672634271099744
278	1.0	0.0	1.0	1.0	1.0	0.8905472636815921	0.1094527363184079	0.9957865168539326	0.8929471032745592	0.9415670650730412	0.955846676370694	0.04415332362930613	0.7763975155279503	0.7583417593528817	0.7672634271099744
278	1.0	0.0	1.0	1.0	1.0	0.8905472636815921	0.1094527363184079	0.9957865168539326	0.8929471032745592	0.9415670650730412	0.955846676370694	0.04415332362930613	0.7763975155279503	0.7583417593528817	0.7672634271099744
278	1.0	0.0	1.0	1.0	1.0	0.8905472636815921	0.1094527363184079	0.9957865168539326	0.8929471032745592	0.9415670650730412	0.955846676370694	0.04415332362930613	0.7763975155279503	0.7583417593528817	0.7672634271099744
278	1.0	0.0	1.0	1.0	1.0	0.8905472636815921	0.1094527363184079	0.9957865168539326	0.8929471032745592	0.9415670650730412	0.955846676370694	0.04415332362930613	0.7763975155279503	0.7583417593528817	0.7672634271099744
278	1.0	0.0	1.0	1.0	1.0	0.8905472636815921	0.1094527363184079	0.9957865168539326	0.8929471032745592	0.9415670650730412	0.955846676370694	0.04415332362930613	0.7763975155279503	0.7583417593528817	0.7672634271099744
278	1.0	0.0	1.0	1.0	1.0	0.8905472636815921	0.1094527363184079	0.9957865168539326	0.8929471032745592	0.9415670650730412	0.955846676370694	0.04415332362930613	0.7763975155279503	0.7583417593528817	0.7672634271099744
278	1.0	0.0	1.0	1.0	1.0	0.8905472636815921	0.1094527363184079	0.9957865168539326	0.8929471032745592	0.9415670650730412	0.955846676370694	0.04415332362930613	0.7763975155279503	0.7583417593528817	0.7672634271099744
278	1.0	0.0	1.0	1.0	1.0	0.8905472636815921	0.1094527363184079	0.9957865168539326	0.8929471032745592	0.9415670650730412	0.955846676370694	0.04415332362930613	0.7763975155279503	0.7583417593528817	0.7672634271099744
278	1.0	0.0	1.0	1.0	1.0	0.8905472636815921	0.1094527363184079	0.9957865168539326	0.8929471032745592	0.9415670650730412	0.955846676370694	0.04415332362930613	0.7763975155279503	0.7583417593528817	0.7672634271099744
278	1.0	0.0	1.0	1.0	1.0	0.8905472636815921	0.1094527363184079	0.9957865168539326	0.8929471032745592	0.9415670650730412	0.955846676370694	0.04415332362930613	0.7763975155279503	0.7583417593528817	0.7672634271099744
278	1.0	0.0	1.0	1.0	1.0	0.8905472636815921	0.1094527363184079	0.9957865168539326	0.8929471032745592	0.9415670650730412	0.955846676370694	0.04415332362930613	0.7763975155279503	0.7583417593528817	0.7672634271099744
278	1.0	0.0	1.0	1.0	1.0	0.8905472636815921	0.1094527363184079	0.9957865168539326	0.8929471032745592	0.9415670650730412	0.955846676370694	0.04415332362930613	0.7763975155279503	0.7583417593528817	0.7672634271099744
278	1.0	0.0	1.0	1.0	1.0	0.8905472636815921	0.1094527363184079	0.9957865168539326	0.8929471032745592	0.9415670650730412	0.955846676370694	0.04415332362930613	0.7763975155279503	0.7583417593528817	0.7672634271099744
278	1.0	0.0	1.0	1.0	1.0	0.8905472636815921	0.1094527363184079	0.9957865168539326	0.8929471032745592	0.9415670650730412	0.955846676370694	0.04415332362930613	0.7763975155279503	0.7583417593528817	0.7672634271099744
278	1.0	0.0	1.0	1.0	1.0	0.8905472636815921	0.1094527363184079	0.9957865168539326	0.8929471032745592	0.9415670650730412	0.955846676370694	0.04415332362930613	0.7763975155279503	0.7583417593528817	0.7672634271099744
286	1.0	0.0	1.0	1.0	1.0	0.8948685857321652	0.1051314142678348	0.995768688293371	0.8970775095298602	0.9438502673796793	0.9557625145518044	0.04423748544819561	0.7802083333333333	0.7535211267605634	0.7666325486182191
286	1.0	0.0	1.0	1.0	1.0	0.8948685857321652	0.1051314142678348	0.995768688293371	0.8970775095298602	0.9438502673796793	0.9557625145518044	0.04423748544819561	0.7802083333333333	0.7535211267605634	0.7666325486182191
286	1.0	0.0	1.0	1.0	1.0	0.9024691358024692	0.09753086419753088	0.9944903581267218	0.905897114178168	0.948128693368352	0.9575604545013112	0.04243954549868889	0.7787971457696228	0.7764227642276422	0.7776081424936386
276	1.0	0.0	1.0	1.0	1.0	0.8614072494669509	0.1385927505330491	0.9950372208436724	0.8642241379310345	0.9250288350634372	0.9616406019474772	0.038359398052522864	0.6999132697311362	0.9482961222091656	0.8053892215568862
271	1.0	0.0	1.0	1.0	1.0	0.8621794871794872	0.13782051282051275	0.9950433705080544	0.8653017241379308	0.9256484149855908	0.9620452310717796	0.03795476892822025	0.7026086956521739	0.9483568075117372	0.8071928071928073
268	1.0	0.0	1.0	1.0	1.0	0.8763769889840881	0.12362301101591187	0.9972067039106144	0.8782287822878229	0.9339437540876389	0.9695791622120712	0.03042083778792881	0.8044692737430168	0.8934850051706308	0.8466438020578149
271	1.0	0.0	1.0	1.0	1.0	0.8369565217391305	0.1630434782608695	0.9971181556195964	0.8387878787878787	0.911125740618828	0.97451609765587	0.02548390234412989	0.8216266173752309	0.9279749478079332	0.8715686274509804
271	1.0	0.0	1.0	1.0	1.0	0.8369565217391305	0.1630434782608695	0.9971181556195964	0.8387878787878787	0.911125740618828	0.97451609765587	0.02548390234412989	0.8216266173752309	0.9279749478079332	0.8715686274509804
271	1.0	0.0	1.0	1.0	1.0	0.8369565217391305	0.1630434782608695	0.9971181556195964	0.8387878787878787	0.911125740618828	0.97451609765587	0.02548390234412989	0.8216266173752309	0.9279749478079332	0.8715686274509804
271	1.0	0.0	1.0	1.0	1.0	0.8369565217391305	0.1630434782608695	0.9971181556195964	0.8387878787878787	0.911125740618828	0.97451609765587	0.02548390234412989	0.8216266173752309	0.9279749478079332	0.8715686274509804
271	1.0	0.0	1.0	1.0	1.0	0.8369565217391305	0.1630434782608695	0.9971181556195964	0.8387878787878787	0.911125740618828	0.97451609765587	0.02548390234412989	0.8216266173752309	0.9279749478079332	0.8715686274509804
271	1.0	0.0	1.0	1.0	1.0	0.8369565217391305	0.1630434782608695	0.9971181556195964	0.8387878787878787	0.911125740618828	0.97451609765587	0.02548390234412989	0.8216266173752309	0.9279749478079332	0.8715686274509804
264	1.0	0.0	1.0	1.0	1.0	0.8289962825278809	0.17100371747211895	0.998502994011976	0.8296019900497512	0.90625	0.9823335274703942	0.017666472529605848	0.8949454905847374	0.9223697650663942	0.9084507042253521
264	1.0	0.0	1.0	1.0	1.0	0.8289962825278809	0.17100371747211895	0.998502994011976	0.8296019900497512	0.90625	0.9823335274703942	0.017666472529605848	0.8949454905847374	0.9223697650663942	0.9084507042253521
264	1.0	0.0	1.0	1.0	1.0	0.8289962825278809	0.17100371747211895	0.998502994011976	0.8296019900497512	0.90625	0.9823335274703942	0.017666472529605848	0.8949454905847374	0.9223697650663942	0.9084507042253521
264	1.0	0.0	1.0	1.0	1.0	0.8289962825278809	0.17100371747211895	0.998502994011976	0.8296019900497512	0.90625	0.9823335274703942	0.017666472529605848	0.8949454905847374	0.9223697650663942	0.9084507042253521
264	1.0	0.0	1.0	1.0	1.0	0.8289962825278809	0.17100371747211895	0.998502994011976	0.8296019900497512	0.90625	0.9823335274703942	0.017666472529605848	0.8949454905847374	0.9223697650663942	0.9084507042253521
264	1.0	0.0	1.0	1.0	1.0	0.8289962825278809	0.17100371747211895	0.998502994011976	0.8296019900497512	0.90625	0.9823335274703942	0.017666472529605848	0.8949454905847374	0.9223697650663942	0.9084507042253521
264	1.0	0.0	1.0	1.0	1.0	0.8289962825278809	0.17100371747211895	0.998502994011976	0.8296019900497512	0.90625	0.9823335274703942	0.017666472529605848	0.8949454905847374	0.9223697650663942	0.9084507042253521
264	1.0	0.0	1.0	1.0	1.0	0.8289962825278809	0.17100371747211895	0.998502994011976	0.8296019900497512	0.90625	0.9823335274703942	0.017666472529605848	0.8949454905847374	0.9223697650663942	0.9084507042253521
264	1.0	0.0	1.0	1.0	1.0	0.8289962825278809	0.17100371747211895	0.998502994011976	0.8296019900497512	0.90625	0.9823335274703942	0.017666472529605848	0.8949454905847374	0.9223697650663942	0.9084507042253521
264	1.0	0.0	1.0	1.0	1.0	0.8289962825278809	0.17100371747211895	0.998502994011976	0.8296019900497512	0.90625	0.9823335274703942	0.017666472529605848	0.8949454905847374	0.9223697650663942	0.9084507042253521
264	1.0	0.0	1.0	1.0	1.0	0.8289962825278809	0.17100371747211895	0.998502994011976	0.8296019900497512	0.90625	0.9823335274703942	0.017666472529605848	0.8949454905847374	0.9223697650663942	0.9084507042253521
264	1.0	0.0	1.0	1.0	1.0	0.8289962825278809	0.17100371747211895	0.998502994011976	0.8296019900497512	0.90625	0.9823335274703942	0.017666472529605848	0.8949454905847374	0.9223697650663942	0.9084507042253521
264	1.0	0.0	1.0	1.0	1.0	0.8289962825278809	0.17100371747211895	0.998502994011976	0.8296019900497512	0.90625	0.9823335274703942	0.017666472529605848	0.8949454905847374	0.9223697650663942	0.9084507042253521
264	1.0	0.0	1.0	1.0	1.0	0.8289962825278809	0.17100371747211895	0.998502994011976	0.8296019900497512	0.90625	0.9823335274703942	0.017666472529605848	0.8949454905847374	0.9223697650663942	0.9084507042253521
264	1.0	0.0	1.0	1.0	1.0	0.8289962825278809	0.17100371747211895	0.998502994011976	0.8296019900497512	0.90625	0.9823335274703942	0.017666472529605848	0.8949454905847374	0.9223697650663942	0.9084507042253521
264	1.0	0.0	1.0	1.0	1.0	0.8094575799721836	0.1905424200278164	1.0	0.8091922005571031	0.8945342571208622	0.9845162531256012	0.015483746874398909	0.937619961612284	0.9105312208760484	0.9238770685579196
264	1.0	0.0	1.0	1.0	1.0	0.8094575799721836	0.1905424200278164	1.0	0.8091922005571031	0.8945342571208622	0.9845162531256012	0.015483746874398909	0.937619961612284	0.9105312208760484	0.9238770685579196
264	1.0	0.0	1.0	1.0	1.0	0.8094575799721836	0.1905424200278164	1.0	0.8091922005571031	0.8945342571208622	0.9845162531256012	0.015483746874398909	0.937619961612284	0.9105312208760484	0.9238770685579196
264	1.0	0.0	1.0	1.0	1.0	0.8094575799721836	0.1905424200278164	1.0	0.8091922005571031	0.8945342571208622	0.9845162531256012	0.015483746874398909	0.937619961612284	0.9105312208760484	0.9238770685579196
263	1.0	0.0	1.0	1.0	1.0	0.8305785123966942	0.16942148760330578	1.0	0.8305785123966942	0.9074492099322801	0.983060635226179	0.016939364773820964	0.9252873563218392	0.9078947368421052	0.9165085388994308
265	1.0	0.0	1.0	1.0	1.0	0.8292349726775956	0.1707650273224044	1.0	0.8290013679890561	0.9065071054599853	0.9834376504573904	0.01656234954260949	0.9261036468330134	0.9103773584905659	0.918173168411037
265	1.0	0.0	1.0	1.0	1.0	0.8292349726775956	0.1707650273224044	1.0	0.8290013679890561	0.9065071054599853	0.9834376504573904	0.01656234954260949	0.9261036468330134	0.9103773584905659	0.918173168411037
271	1.0	0.0	1.0	1.0	1.0	0.8306010928961749	0.1693989071038251	1.0	0.8303693570451436	0.9073243647234678	0.9843042850264804	0.015695714973519515	0.9283667621776504	0.9169811320754716	0.9226388229710492
269	1.0	0.0	1.0	1.0	1.0	0.8408796895213454	0.1591203104786546	0.998463901689708	0.8419689119170984	0.9135628952916371	0.9842405491636856	0.01575945083631447	0.9154518950437318	0.9253438113948921	0.920371275036639
269	1.0	0.0	1.0	1.0	1.0	0.8408796895213454	0.1591203104786546	0.998463901689708	0.8419689119170984	0.9135628952916371	0.9842405491636856	0.01575945083631447	0.9154518950437318	0.9253438113948921	0.920371275036639
269	1.0	0.0	1.0	1.0	1.0	0.8408796895213454	0.1591203104786546	0.998463901689708	0.8419689119170984	0.9135628952916371	0.9842405491636856	0.01575945083631447	0.9154518950437318	0.9253438113948921	0.920371275036639
269	1.0	0.0	1.0	1.0	1.0	0.8408796895213454	0.1591203104786546	0.998463901689708	0.8419689119170984	0.9135628952916371	0.9842405491636856	0.01575945083631447	0.9154518950437318	0.9253438113948921	0.920371275036639
269	1.0	0.0	1.0	1.0	1.0	0.8408796895213454	0.1591203104786546	0.998463901689708	0.8419689119170984	0.9135628952916371	0.9842405491636856	0.01575945083631447	0.9154518950437318	0.9253438113948921	0.920371275036639
269	1.0	0.0	1.0	1.0	1.0	0.8408796895213454	0.1591203104786546	0.998463901689708	0.8419689119170984	0.9135628952916371	0.9842405491636856	0.01575945083631447	0.9154518950437318	0.9253438113948921	0.920371275036639
269	1.0	0.0	1.0	1.0	1.0	0.8408796895213454	0.1591203104786546	0.998463901689708	0.8419689119170984	0.9135628952916371	0.9842405491636856	0.01575945083631447	0.9154518950437318	0.9253438113948921	0.920371275036639
283	1.0	0.0	1.0	1.0	1.0	0.8419580419580419	0.15804195804195809	1.0	0.8417366946778712	0.9140684410646388	0.9843299365506634	0.01567006344933664	0.9335863377609108	0.913649025069638	0.9235100891600188
277	1.0	0.0	1.0	1.0	1.0	0.8458333333333333	0.15416666666666667	1.0	0.8456189151599444	0.9163526752072344	0.984418582283351	0.015581417716649002	0.932509505703422	0.9151119402985076	0.923728813559322
277	1.0	0.0	1.0	1.0	1.0	0.8458333333333333	0.15416666666666667	1.0	0.8456189151599444	0.9163526752072344	0.984418582283351	0.015581417716649002	0.932509505703422	0.9151119402985076	0.923728813559322
281	1.0	0.0	1.0	1.0	1.0	0.8565340909090909	0.14346590909090906	1.0	0.8565340909090909	0.922723794950268	0.9836711170876956	0.016328882912304277	0.9369627507163324	0.9041474654377879	0.9202626641651032
281	1.0	0.0	1.0	1.0	1.0	0.8565340909090909	0.14346590909090906	1.0	0.8565340909090909	0.922723794950268	0.9836711170876956	0.016328882912304277	0.9369627507163324	0.9041474654377879	0.9202626641651032
281	1.0	0.0	1.0	1.0	1.0	0.8565340909090909	0.14346590909090906	1.0	0.8565340909090909	0.922723794950268	0.9836711170876956	0.016328882912304277	0.9369627507163324	0.9041474654377879	0.9202626641651032
281	1.0	0.0	1.0	1.0	1.0	0.8565340909090909	0.14346590909090906	1.0	0.8565340909090909	0.922723794950268	0.9836711170876956	0.016328882912304277	0.9369627507163324	0.9041474654377879	0.9202626641651032
281	1.0	0.0	1.0	1.0	1.0	0.8565340909090909	0.14346590909090906	1.0	0.8565340909090909	0.922723794950268	0.9836711170876956	0.016328882912304277	0.9369627507163324	0.9041474654377879	0.9202626641651032
281	1.0	0.0	1.0	1.0	1.0	0.8565340909090909	0.14346590909090906	1.0	0.8565340909090909	0.922723794950268	0.9836711170876956	0.016328882912304277	0.9369627507163324	0.9041474654377879	0.9202626641651032
281	1.0	0.0	1.0	1.0	1.0	0.8565340909090909	0.14346590909090906	1.0	0.8565340909090909	0.922723794950268	0.9836711170876956	0.016328882912304277	0.9369627507163324	0.9041474654377879	0.9202626641651032
281	1.0	0.0	1.0	1.0	1.0	0.8565340909090909	0.14346590909090906	1.0	0.8565340909090909	0.922723794950268	0.9836711170876956	0.016328882912304277	0.9369627507163324	0.9041474654377879	0.9202626641651032
281	1.0	0.0	1.0	1.0	1.0	0.8565340909090909	0.14346590909090906	1.0	0.8565340909090909	0.922723794950268	0.9836711170876956	0.016328882912304277	0.9369627507163324	0.9041474654377879	0.9202626641651032
283	1.0	0.0	1.0	1.0	1.0	0.8633093525179856	0.13669064748201445	1.0	0.8633093525179856	0.9266409266409266	0.9831110258132616	0.01688897418673829	0.9388729703915949	0.897716894977169	0.9178338001867414
283	1.0	0.0	1.0	1.0	1.0	0.8633093525179856	0.13669064748201445	1.0	0.8633093525179856	0.9266409266409266	0.9831110258132616	0.01688897418673829	0.9388729703915949	0.897716894977169	0.9178338001867414
283	1.0	0.0	1.0	1.0	1.0	0.8633093525179856	0.13669064748201445	1.0	0.8633093525179856	0.9266409266409266	0.9831110258132616	0.01688897418673829	0.9388729703915949	0.897716894977169	0.9178338001867414
283	1.0	0.0	1.0	1.0	1.0	0.8633093525179856	0.13669064748201445	1.0	0.8633093525179856	0.9266409266409266	0.9831110258132616	0.01688897418673829	0.9388729703915949	0.897716894977169	0.9178338001867414
283	1.0	0.0	1.0	1.0	1.0	0.8633093525179856	0.13669064748201445	1.0	0.8633093525179856	0.9266409266409266	0.9831110258132616	0.01688897418673829	0.9388729703915949	0.897716894977169	0.9178338001867414
283	1.0	0.0	1.0	1.0	1.0	0.8633093525179856	0.13669064748201445	1.0	0.8633093525179856	0.9266409266409266	0.9831110258132616	0.01688897418673829	0.9388729703915949	0.897716894977169	0.9178338001867414
283	1.0	0.0	1.0	1.0	1.0	0.8633093525179856	0.13669064748201445	1.0	0.8633093525179856	0.9266409266409266	0.9831110258132616	0.01688897418673829	0.9388729703915949	0.897716894977169	0.9178338001867414
283	1.0	0.0	1.0	1.0	1.0	0.8633093525179856	0.13669064748201445	1.0	0.8633093525179856	0.9266409266409266	0.9831110258132616	0.01688897418673829	0.9388729703915949	0.897716894977169	0.9178338001867414
283	1.0	0.0	1.0	1.0	1.0	0.8633093525179856	0.13669064748201445	1.0	0.8633093525179856	0.9266409266409266	0.9831110258132616	0.01688897418673829	0.9388729703915949	0.897716894977169	0.9178338001867414
283	1.0	0.0	1.0	1.0	1.0	0.8633093525179856	0.13669064748201445	1.0	0.8633093525179856	0.9266409266409266	0.9831110258132616	0.01688897418673829	0.9388729703915949	0.897716894977169	0.9178338001867414
283	1.0	0.0	1.0	1.0	1.0	0.8633093525179856	0.13669064748201445	1.0	0.8633093525179856	0.9266409266409266	0.9831110258132616	0.01688897418673829	0.9388729703915949	0.897716894977169	0.9178338001867414
283	1.0	0.0	1.0	1.0	1.0	0.8633093525179856	0.13669064748201445	1.0	0.8633093525179856	0.9266409266409266	0.9831110258132616	0.01688897418673829	0.9388729703915949	0.897716894977169	0.9178338001867414
283	1.0	0.0	1.0	1.0	1.0	0.8633093525179856	0.13669064748201445	1.0	0.8633093525179856	0.9266409266409266	0.9831110258132616	0.01688897418673829	0.9388729703915949	0.897716894977169	0.9178338001867414
