# Supplementary material for: An Improved Hybrid Feature Selection Algorithm for Electric Charge Recovery Risk
Source: Hindawi journal article supplement (doi:10.1155/2020/8479341), 2020-08-28
Supplement: f1 [file 8479341.f1.zip › 8479341.f1/Experimental Results/201808/HPSO_SSM_SBS_results.csv]

features_num	Accuracy_high	Loss_high	Precission_high	Recall_high	F1_high	Accuracy_med	Loss_med	Precission_med	Recall_med	F1_med	Accuracy_low	Loss_low	Precission_low	Recall_low	F1_low
283	1	0	1	1	1	0.859747546	0.140252454	1	0.859747546	0.924585219	0.982793425	0.017206575	0.93256262	0.898792943	0.91536643
282	1	0	1	1	1	0.862068966	0.137931034	1	0.862068966	0.925925926	0.983302946	0.016697054	0.940669856	0.897716895	0.918691589
282	1	0	1	1	1	0.862068966	0.137931034	1	0.862068966	0.925925926	0.983302946	0.016697054	0.940669856	0.897716895	0.918691589
282	1	0	1	1	1	0.862068966	0.137931034	1	0.862068966	0.925925926	0.983302946	0.016697054	0.940669856	0.897716895	0.918691589
282	1	0	1	1	1	0.862068966	0.137931034	1	0.862068966	0.925925926	0.983302946	0.016697054	0.940669856	0.897716895	0.918691589
282	1	0	1	1	1	0.862068966	0.137931034	1	0.862068966	0.925925926	0.983302946	0.016697054	0.940669856	0.897716895	0.918691589
282	1	0	1	1	1	0.862068966	0.137931034	1	0.862068966	0.925925926	0.983302946	0.016697054	0.940669856	0.897716895	0.918691589
282	1	0	1	1	1	0.862068966	0.137931034	1	0.862068966	0.925925926	0.983302946	0.016697054	0.940669856	0.897716895	0.918691589
282	1	0	1	1	1	0.862068966	0.137931034	1	0.862068966	0.925925926	0.983302946	0.016697054	0.940669856	0.897716895	0.918691589
282	1	0	1	1	1	0.862068966	0.137931034	1	0.862068966	0.925925926	0.983302946	0.016697054	0.940669856	0.897716895	0.918691589
282	1	0	1	1	1	0.862068966	0.137931034	1	0.862068966	0.925925926	0.983302946	0.016697054	0.940669856	0.897716895	0.918691589
282	1	0	1	1	1	0.862068966	0.137931034	1	0.862068966	0.925925926	0.983302946	0.016697054	0.940669856	0.897716895	0.918691589
282	1	0	1	1	1	0.862068966	0.137931034	1	0.862068966	0.925925926	0.983302946	0.016697054	0.940669856	0.897716895	0.918691589
282	1	0	1	1	1	0.862068966	0.137931034	1	0.862068966	0.925925926	0.983302946	0.016697054	0.940669856	0.897716895	0.918691589
282	1	0	1	1	1	0.862068966	0.137931034	1	0.862068966	0.925925926	0.983302946	0.016697054	0.940669856	0.897716895	0.918691589
282	1	0	1	1	1	0.862068966	0.137931034	1	0.862068966	0.925925926	0.983302946	0.016697054	0.940669856	0.897716895	0.918691589
282	1	0	1	1	1	0.862068966	0.137931034	1	0.862068966	0.925925926	0.983302946	0.016697054	0.940669856	0.897716895	0.918691589
282	1	0	1	1	1	0.862068966	0.137931034	1	0.862068966	0.925925926	0.983302946	0.016697054	0.940669856	0.897716895	0.918691589
282	1	0	1	1	1	0.862068966	0.137931034	1	0.862068966	0.925925926	0.983302946	0.016697054	0.940669856	0.897716895	0.918691589
282	1	0	1	1	1	0.862068966	0.137931034	1	0.862068966	0.925925926	0.983302946	0.016697054	0.940669856	0.897716895	0.918691589
282	1	0	1	1	1	0.862068966	0.137931034	1	0.862068966	0.925925926	0.983302946	0.016697054	0.940669856	0.897716895	0.918691589
282	1	0	1	1	1	0.862068966	0.137931034	1	0.862068966	0.925925926	0.983302946	0.016697054	0.940669856	0.897716895	0.918691589
282	1	0	1	1	1	0.862068966	0.137931034	1	0.862068966	0.925925926	0.983302946	0.016697054	0.940669856	0.897716895	0.918691589
282	1	0	1	1	1	0.862068966	0.137931034	1	0.862068966	0.925925926	0.983302946	0.016697054	0.940669856	0.897716895	0.918691589
282	1	0	1	1	1	0.862068966	0.137931034	1	0.862068966	0.925925926	0.983302946	0.016697054	0.940669856	0.897716895	0.918691589
282	1	0	1	1	1	0.862068966	0.137931034	1	0.862068966	0.925925926	0.983302946	0.016697054	0.940669856	0.897716895	0.918691589
282	1	0	1	1	1	0.862068966	0.137931034	1	0.862068966	0.925925926	0.983302946	0.016697054	0.940669856	0.897716895	0.918691589
282	1	0	1	1	1	0.862068966	0.137931034	1	0.862068966	0.925925926	0.983302946	0.016697054	0.940669856	0.897716895	0.918691589
282	1	0	1	1	1	0.862068966	0.137931034	1	0.862068966	0.925925926	0.983302946	0.016697054	0.940669856	0.897716895	0.918691589
282	1	0	1	1	1	0.862068966	0.137931034	1	0.862068966	0.925925926	0.983302946	0.016697054	0.940669856	0.897716895	0.918691589
282	1	0	1	1	1	0.862068966	0.137931034	1	0.862068966	0.925925926	0.983302946	0.016697054	0.940669856	0.897716895	0.918691589
282	1	0	1	1	1	0.862068966	0.137931034	1	0.862068966	0.925925926	0.983302946	0.016697054	0.940669856	0.897716895	0.918691589
282	1	0	1	1	1	0.862068966	0.137931034	1	0.862068966	0.925925926	0.983302946	0.016697054	0.940669856	0.897716895	0.918691589
282	1	0	1	1	1	0.862068966	0.137931034	1	0.862068966	0.925925926	0.983302946	0.016697054	0.940669856	0.897716895	0.918691589
282	1	0	1	1	1	0.862068966	0.137931034	1	0.862068966	0.925925926	0.983302946	0.016697054	0.940669856	0.897716895	0.918691589
282	1	0	1	1	1	0.862068966	0.137931034	1	0.862068966	0.925925926	0.983302946	0.016697054	0.940669856	0.897716895	0.918691589
282	1	0	1	1	1	0.862068966	0.137931034	1	0.862068966	0.925925926	0.983302946	0.016697054	0.940669856	0.897716895	0.918691589
282	1	0	1	1	1	0.862068966	0.137931034	1	0.862068966	0.925925926	0.983302946	0.016697054	0.940669856	0.897716895	0.918691589
282	1	0	1	1	1	0.862068966	0.137931034	1	0.862068966	0.925925926	0.983302946	0.016697054	0.940669856	0.897716895	0.918691589
282	1	0	1	1	1	0.862068966	0.137931034	1	0.862068966	0.925925926	0.983302946	0.016697054	0.940669856	0.897716895	0.918691589
282	1	0	1	1	1	0.862068966	0.137931034	1	0.862068966	0.925925926	0.983302946	0.016697054	0.940669856	0.897716895	0.918691589
282	1	0	1	1	1	0.862068966	0.137931034	1	0.862068966	0.925925926	0.983302946	0.016697054	0.940669856	0.897716895	0.918691589
282	1	0	1	1	1	0.862068966	0.137931034	1	0.862068966	0.925925926	0.983302946	0.016697054	0.940669856	0.897716895	0.918691589
282	1	0	1	1	1	0.862068966	0.137931034	1	0.862068966	0.925925926	0.983302946	0.016697054	0.940669856	0.897716895	0.918691589
282	1	0	1	1	1	0.862068966	0.137931034	1	0.862068966	0.925925926	0.983302946	0.016697054	0.940669856	0.897716895	0.918691589
282	1	0	1	1	1	0.862068966	0.137931034	1	0.862068966	0.925925926	0.983302946	0.016697054	0.940669856	0.897716895	0.918691589
282	1	0	1	1	1	0.862068966	0.137931034	1	0.862068966	0.925925926	0.983302946	0.016697054	0.940669856	0.897716895	0.918691589
282	1	0	1	1	1	0.862068966	0.137931034	1	0.862068966	0.925925926	0.983302946	0.016697054	0.940669856	0.897716895	0.918691589
282	1	0	1	1	1	0.862068966	0.137931034	1	0.862068966	0.925925926	0.983302946	0.016697054	0.940669856	0.897716895	0.918691589
282	1	0	1	1	1	0.862068966	0.137931034	1	0.862068966	0.925925926	0.983302946	0.016697054	0.940669856	0.897716895	0.918691589
282	1	0	1	1	1	0.862068966	0.137931034	1	0.862068966	0.925925926	0.983302946	0.016697054	0.940669856	0.897716895	0.918691589
282	1	0	1	1	1	0.862068966	0.137931034	1	0.862068966	0.925925926	0.983302946	0.016697054	0.940669856	0.897716895	0.918691589
282	1	0	1	1	1	0.862068966	0.137931034	1	0.862068966	0.925925926	0.983302946	0.016697054	0.940669856	0.897716895	0.918691589
282	1	0	1	1	1	0.862068966	0.137931034	1	0.862068966	0.925925926	0.983302946	0.016697054	0.940669856	0.897716895	0.918691589
282	1	0	1	1	1	0.862068966	0.137931034	1	0.862068966	0.925925926	0.983302946	0.016697054	0.940669856	0.897716895	0.918691589
282	1	0	1	1	1	0.862068966	0.137931034	1	0.862068966	0.925925926	0.983302946	0.016697054	0.940669856	0.897716895	0.918691589
282	1	0	1	1	1	0.862068966	0.137931034	1	0.862068966	0.925925926	0.983302946	0.016697054	0.940669856	0.897716895	0.918691589
282	1	0	1	1	1	0.862068966	0.137931034	1	0.862068966	0.925925926	0.983302946	0.016697054	0.940669856	0.897716895	0.918691589
282	1	0	1	1	1	0.862068966	0.137931034	1	0.862068966	0.925925926	0.983302946	0.016697054	0.940669856	0.897716895	0.918691589
282	1	0	1	1	1	0.862068966	0.137931034	1	0.862068966	0.925925926	0.983302946	0.016697054	0.940669856	0.897716895	0.918691589
282	1	0	1	1	1	0.862068966	0.137931034	1	0.862068966	0.925925926	0.983302946	0.016697054	0.940669856	0.897716895	0.918691589
282	1	0	1	1	1	0.862068966	0.137931034	1	0.862068966	0.925925926	0.983302946	0.016697054	0.940669856	0.897716895	0.918691589
282	1	0	1	1	1	0.862068966	0.137931034	1	0.862068966	0.925925926	0.983302946	0.016697054	0.940669856	0.897716895	0.918691589
282	1	0	1	1	1	0.862068966	0.137931034	1	0.862068966	0.925925926	0.983302946	0.016697054	0.940669856	0.897716895	0.918691589
282	1	0	1	1	1	0.862068966	0.137931034	1	0.862068966	0.925925926	0.983302946	0.016697054	0.940669856	0.897716895	0.918691589
282	1	0	1	1	1	0.862068966	0.137931034	1	0.862068966	0.925925926	0.983302946	0.016697054	0.940669856	0.897716895	0.918691589
282	1	0	1	1	1	0.862068966	0.137931034	1	0.862068966	0.925925926	0.983302946	0.016697054	0.940669856	0.897716895	0.918691589
282	1	0	1	1	1	0.862068966	0.137931034	1	0.862068966	0.925925926	0.983302946	0.016697054	0.940669856	0.897716895	0.918691589
282	1	0	1	1	1	0.862068966	0.137931034	1	0.862068966	0.925925926	0.983302946	0.016697054	0.940669856	0.897716895	0.918691589
282	1	0	1	1	1	0.862068966	0.137931034	1	0.862068966	0.925925926	0.983302946	0.016697054	0.940669856	0.897716895	0.918691589
282	1	0	1	1	1	0.862068966	0.137931034	1	0.862068966	0.925925926	0.983302946	0.016697054	0.940669856	0.897716895	0.918691589
282	1	0	1	1	1	0.862068966	0.137931034	1	0.862068966	0.925925926	0.983302946	0.016697054	0.940669856	0.897716895	0.918691589
282	1	0	1	1	1	0.862068966	0.137931034	1	0.862068966	0.925925926	0.983302946	0.016697054	0.940669856	0.897716895	0.918691589
282	1	0	1	1	1	0.862068966	0.137931034	1	0.862068966	0.925925926	0.983302946	0.016697054	0.940669856	0.897716895	0.918691589
281	1	0	1	1	1	0.862068966	0.137931034	1	0.862068966	0.925925926	0.983302946	0.016697054	0.940669856	0.897716895	0.918691589
281	1	0	1	1	1	0.862068966	0.137931034	1	0.862068966	0.925925926	0.983302946	0.016697054	0.940669856	0.897716895	0.918691589
281	1	0	1	1	1	0.862068966	0.137931034	1	0.862068966	0.925925926	0.983302946	0.016697054	0.940669856	0.897716895	0.918691589
281	1	0	1	1	1	0.862068966	0.137931034	1	0.862068966	0.925925926	0.983302946	0.016697054	0.940669856	0.897716895	0.918691589
281	1	0	1	1	1	0.862068966	0.137931034	1	0.862068966	0.925925926	0.983302946	0.016697054	0.940669856	0.897716895	0.918691589
281	1	0	1	1	1	0.862068966	0.137931034	1	0.862068966	0.925925926	0.983302946	0.016697054	0.940669856	0.897716895	0.918691589
281	1	0	1	1	1	0.862068966	0.137931034	1	0.862068966	0.925925926	0.983302946	0.016697054	0.940669856	0.897716895	0.918691589
281	1	0	1	1	1	0.862068966	0.137931034	1	0.862068966	0.925925926	0.983302946	0.016697054	0.940669856	0.897716895	0.918691589
281	1	0	1	1	1	0.862068966	0.137931034	1	0.862068966	0.925925926	0.983302946	0.016697054	0.940669856	0.897716895	0.918691589
281	1	0	1	1	1	0.862068966	0.137931034	1	0.862068966	0.925925926	0.983302946	0.016697054	0.940669856	0.897716895	0.918691589
281	1	0	1	1	1	0.862068966	0.137931034	1	0.862068966	0.925925926	0.983302946	0.016697054	0.940669856	0.897716895	0.918691589
281	1	0	1	1	1	0.862068966	0.137931034	1	0.862068966	0.925925926	0.983302946	0.016697054	0.940669856	0.897716895	0.918691589
281	1	0	1	1	1	0.862068966	0.137931034	1	0.862068966	0.925925926	0.983302946	0.016697054	0.940669856	0.897716895	0.918691589
281	1	0	1	1	1	0.862068966	0.137931034	1	0.862068966	0.925925926	0.983302946	0.016697054	0.940669856	0.897716895	0.918691589
281	1	0	1	1	1	0.862068966	0.137931034	1	0.862068966	0.925925926	0.983302946	0.016697054	0.940669856	0.897716895	0.918691589
281	1	0	1	1	1	0.862068966	0.137931034	1	0.862068966	0.925925926	0.983302946	0.016697054	0.940669856	0.897716895	0.918691589
281	1	0	1	1	1	0.862068966	0.137931034	1	0.862068966	0.925925926	0.983302946	0.016697054	0.940669856	0.897716895	0.918691589
281	1	0	1	1	1	0.862068966	0.137931034	1	0.862068966	0.925925926	0.983302946	0.016697054	0.940669856	0.897716895	0.918691589
281	1	0	1	1	1	0.862068966	0.137931034	1	0.862068966	0.925925926	0.983302946	0.016697054	0.940669856	0.897716895	0.918691589
281	1	0	1	1	1	0.862068966	0.137931034	1	0.862068966	0.925925926	0.983302946	0.016697054	0.940669856	0.897716895	0.918691589
281	1	0	1	1	1	0.862068966	0.137931034	1	0.862068966	0.925925926	0.983302946	0.016697054	0.940669856	0.897716895	0.918691589
281	1	0	1	1	1	0.862068966	0.137931034	1	0.862068966	0.925925926	0.983302946	0.016697054	0.940669856	0.897716895	0.918691589
281	1	0	1	1	1	0.862068966	0.137931034	1	0.862068966	0.925925926	0.983302946	0.016697054	0.940669856	0.897716895	0.918691589
281	1	0	1	1	1	0.862068966	0.137931034	1	0.862068966	0.925925926	0.983302946	0.016697054	0.940669856	0.897716895	0.918691589
281	1	0	1	1	1	0.862068966	0.137931034	1	0.862068966	0.925925926	0.983302946	0.016697054	0.940669856	0.897716895	0.918691589
281	1	0	1	1	1	0.862068966	0.137931034	1	0.862068966	0.925925926	0.983302946	0.016697054	0.940669856	0.897716895	0.918691589
281	1	0	1	1	1	0.862068966	0.137931034	1	0.862068966	0.925925926	0.983302946	0.016697054	0.940669856	0.897716895	0.918691589
281	1	0	1	1	1	0.862068966	0.137931034	1	0.862068966	0.925925926	0.983302946	0.016697054	0.940669856	0.897716895	0.918691589
281	1	0	1	1	1	0.862068966	0.137931034	1	0.862068966	0.925925926	0.983302946	0.016697054	0.940669856	0.897716895	0.918691589
281	1	0	1	1	1	0.862068966	0.137931034	1	0.862068966	0.925925926	0.983302946	0.016697054	0.940669856	0.897716895	0.918691589
281	1	0	1	1	1	0.862068966	0.137931034	1	0.862068966	0.925925926	0.983302946	0.016697054	0.940669856	0.897716895	0.918691589
280	1	0	1	1	1	0.863112392	0.136887608	1	0.863112392	0.926527456	0.983208597	0.016791403	0.93982808	0.897810219	0.918338777
280	1	0	1	1	1	0.863112392	0.136887608	1	0.863112392	0.926527456	0.983208597	0.016791403	0.93982808	0.897810219	0.918338777
280	1	0	1	1	1	0.863112392	0.136887608	1	0.863112392	0.926527456	0.983208597	0.016791403	0.93982808	0.897810219	0.918338777
280	1	0	1	1	1	0.863112392	0.136887608	1	0.863112392	0.926527456	0.983208597	0.016791403	0.93982808	0.897810219	0.918338777
280	1	0	1	1	1	0.863112392	0.136887608	1	0.863112392	0.926527456	0.983208597	0.016791403	0.93982808	0.897810219	0.918338777
280	1	0	1	1	1	0.863112392	0.136887608	1	0.863112392	0.926527456	0.983208597	0.016791403	0.93982808	0.897810219	0.918338777
280	1	0	1	1	1	0.863112392	0.136887608	1	0.863112392	0.926527456	0.983208597	0.016791403	0.93982808	0.897810219	0.918338777
280	1	0	1	1	1	0.863112392	0.136887608	1	0.863112392	0.926527456	0.983208597	0.016791403	0.93982808	0.897810219	0.918338777
280	1	0	1	1	1	0.863112392	0.136887608	1	0.863112392	0.926527456	0.983208597	0.016791403	0.93982808	0.897810219	0.918338777
280	1	0	1	1	1	0.863112392	0.136887608	1	0.863112392	0.926527456	0.983208597	0.016791403	0.93982808	0.897810219	0.918338777
280	1	0	1	1	1	0.863112392	0.136887608	1	0.863112392	0.926527456	0.983208597	0.016791403	0.93982808	0.897810219	0.918338777
280	1	0	1	1	1	0.863112392	0.136887608	1	0.863112392	0.926527456	0.983208597	0.016791403	0.93982808	0.897810219	0.918338777
280	1	0	1	1	1	0.863112392	0.136887608	1	0.863112392	0.926527456	0.983208597	0.016791403	0.93982808	0.897810219	0.918338777
280	1	0	1	1	1	0.863112392	0.136887608	1	0.863112392	0.926527456	0.983208597	0.016791403	0.93982808	0.897810219	0.918338777
280	1	0	1	1	1	0.863112392	0.136887608	1	0.863112392	0.926527456	0.983208597	0.016791403	0.93982808	0.897810219	0.918338777
280	1	0	1	1	1	0.863112392	0.136887608	1	0.863112392	0.926527456	0.983208597	0.016791403	0.93982808	0.897810219	0.918338777
280	1	0	1	1	1	0.863112392	0.136887608	1	0.863112392	0.926527456	0.983208597	0.016791403	0.93982808	0.897810219	0.918338777
280	1	0	1	1	1	0.863112392	0.136887608	1	0.863112392	0.926527456	0.983208597	0.016791403	0.93982808	0.897810219	0.918338777
280	1	0	1	1	1	0.863112392	0.136887608	1	0.863112392	0.926527456	0.983208597	0.016791403	0.93982808	0.897810219	0.918338777
280	1	0	1	1	1	0.863112392	0.136887608	1	0.863112392	0.926527456	0.983208597	0.016791403	0.93982808	0.897810219	0.918338777
280	1	0	1	1	1	0.863112392	0.136887608	1	0.863112392	0.926527456	0.983208597	0.016791403	0.93982808	0.897810219	0.918338777
280	1	0	1	1	1	0.863112392	0.136887608	1	0.863112392	0.926527456	0.983208597	0.016791403	0.93982808	0.897810219	0.918338777
280	1	0	1	1	1	0.863112392	0.136887608	1	0.863112392	0.926527456	0.983208597	0.016791403	0.93982808	0.897810219	0.918338777
280	1	0	1	1	1	0.863112392	0.136887608	1	0.863112392	0.926527456	0.983208597	0.016791403	0.93982808	0.897810219	0.918338777
280	1	0	1	1	1	0.863112392	0.136887608	1	0.863112392	0.926527456	0.983208597	0.016791403	0.93982808	0.897810219	0.918338777
280	1	0	1	1	1	0.863112392	0.136887608	1	0.863112392	0.926527456	0.983208597	0.016791403	0.93982808	0.897810219	0.918338777
280	1	0	1	1	1	0.863112392	0.136887608	1	0.863112392	0.926527456	0.983208597	0.016791403	0.93982808	0.897810219	0.918338777
280	1	0	1	1	1	0.863112392	0.136887608	1	0.863112392	0.926527456	0.983208597	0.016791403	0.93982808	0.897810219	0.918338777
280	1	0	1	1	1	0.863112392	0.136887608	1	0.863112392	0.926527456	0.983208597	0.016791403	0.93982808	0.897810219	0.918338777
280	1	0	1	1	1	0.863112392	0.136887608	1	0.863112392	0.926527456	0.983208597	0.016791403	0.93982808	0.897810219	0.918338777
280	1	0	1	1	1	0.863112392	0.136887608	1	0.863112392	0.926527456	0.983208597	0.016791403	0.93982808	0.897810219	0.918338777
279	1	0	1	1	1	0.863112392	0.136887608	1	0.863112392	0.926527456	0.983208597	0.016791403	0.93982808	0.897810219	0.918338777
279	1	0	1	1	1	0.863112392	0.136887608	1	0.863112392	0.926527456	0.983208597	0.016791403	0.93982808	0.897810219	0.918338777
279	1	0	1	1	1	0.863112392	0.136887608	1	0.863112392	0.926527456	0.983208597	0.016791403	0.93982808	0.897810219	0.918338777
279	1	0	1	1	1	0.863112392	0.136887608	1	0.863112392	0.926527456	0.983208597	0.016791403	0.93982808	0.897810219	0.918338777
279	1	0	1	1	1	0.863112392	0.136887608	1	0.863112392	0.926527456	0.983208597	0.016791403	0.93982808	0.897810219	0.918338777
279	1	0	1	1	1	0.863112392	0.136887608	1	0.863112392	0.926527456	0.983208597	0.016791403	0.93982808	0.897810219	0.918338777
279	1	0	1	1	1	0.863112392	0.136887608	1	0.863112392	0.926527456	0.983208597	0.016791403	0.93982808	0.897810219	0.918338777
279	1	0	1	1	1	0.863112392	0.136887608	1	0.863112392	0.926527456	0.983208597	0.016791403	0.93982808	0.897810219	0.918338777
279	1	0	1	1	1	0.863112392	0.136887608	1	0.863112392	0.926527456	0.983208597	0.016791403	0.93982808	0.897810219	0.918338777
279	1	0	1	1	1	0.863112392	0.136887608	1	0.863112392	0.926527456	0.983208597	0.016791403	0.93982808	0.897810219	0.918338777
279	1	0	1	1	1	0.863112392	0.136887608	1	0.863112392	0.926527456	0.983208597	0.016791403	0.93982808	0.897810219	0.918338777
279	1	0	1	1	1	0.863112392	0.136887608	1	0.863112392	0.926527456	0.983208597	0.016791403	0.93982808	0.897810219	0.918338777
279	1	0	1	1	1	0.863112392	0.136887608	1	0.863112392	0.926527456	0.983208597	0.016791403	0.93982808	0.897810219	0.918338777
279	1	0	1	1	1	0.863112392	0.136887608	1	0.863112392	0.926527456	0.983208597	0.016791403	0.93982808	0.897810219	0.918338777
279	1	0	1	1	1	0.863112392	0.136887608	1	0.863112392	0.926527456	0.983208597	0.016791403	0.93982808	0.897810219	0.918338777
279	1	0	1	1	1	0.863112392	0.136887608	1	0.863112392	0.926527456	0.983208597	0.016791403	0.93982808	0.897810219	0.918338777
279	1	0	1	1	1	0.863112392	0.136887608	1	0.863112392	0.926527456	0.983208597	0.016791403	0.93982808	0.897810219	0.918338777
279	1	0	1	1	1	0.863112392	0.136887608	1	0.863112392	0.926527456	0.983208597	0.016791403	0.93982808	0.897810219	0.918338777
279	1	0	1	1	1	0.863112392	0.136887608	1	0.863112392	0.926527456	0.983208597	0.016791403	0.93982808	0.897810219	0.918338777
279	1	0	1	1	1	0.863112392	0.136887608	1	0.863112392	0.926527456	0.983208597	0.016791403	0.93982808	0.897810219	0.918338777
279	1	0	1	1	1	0.863112392	0.136887608	1	0.863112392	0.926527456	0.983208597	0.016791403	0.93982808	0.897810219	0.918338777
279	1	0	1	1	1	0.863112392	0.136887608	1	0.863112392	0.926527456	0.983208597	0.016791403	0.93982808	0.897810219	0.918338777
279	1	0	1	1	1	0.863112392	0.136887608	1	0.863112392	0.926527456	0.983208597	0.016791403	0.93982808	0.897810219	0.918338777
279	1	0	1	1	1	0.863112392	0.136887608	1	0.863112392	0.926527456	0.983208597	0.016791403	0.93982808	0.897810219	0.918338777
279	1	0	1	1	1	0.863112392	0.136887608	1	0.863112392	0.926527456	0.983208597	0.016791403	0.93982808	0.897810219	0.918338777
279	1	0	1	1	1	0.863112392	0.136887608	1	0.863112392	0.926527456	0.983208597	0.016791403	0.93982808	0.897810219	0.918338777
279	1	0	1	1	1	0.863112392	0.136887608	1	0.863112392	0.926527456	0.983208597	0.016791403	0.93982808	0.897810219	0.918338777
279	1	0	1	1	1	0.863112392	0.136887608	1	0.863112392	0.926527456	0.983208597	0.016791403	0.93982808	0.897810219	0.918338777
279	1	0	1	1	1	0.863112392	0.136887608	1	0.863112392	0.926527456	0.983208597	0.016791403	0.93982808	0.897810219	0.918338777
279	1	0	1	1	1	0.863112392	0.136887608	1	0.863112392	0.926527456	0.983208597	0.016791403	0.93982808	0.897810219	0.918338777
279	1	0	1	1	1	0.863112392	0.136887608	1	0.863112392	0.926527456	0.983208597	0.016791403	0.93982808	0.897810219	0.918338777
279	1	0	1	1	1	0.863112392	0.136887608	1	0.863112392	0.926527456	0.983208597	0.016791403	0.93982808	0.897810219	0.918338777
279	1	0	1	1	1	0.863112392	0.136887608	1	0.863112392	0.926527456	0.983208597	0.016791403	0.93982808	0.897810219	0.918338777
279	1	0	1	1	1	0.863112392	0.136887608	1	0.863112392	0.926527456	0.983208597	0.016791403	0.93982808	0.897810219	0.918338777
279	1	0	1	1	1	0.863112392	0.136887608	1	0.863112392	0.926527456	0.983208597	0.016791403	0.93982808	0.897810219	0.918338777
279	1	0	1	1	1	0.863112392	0.136887608	1	0.863112392	0.926527456	0.983208597	0.016791403	0.93982808	0.897810219	0.918338777
279	1	0	1	1	1	0.863112392	0.136887608	1	0.863112392	0.926527456	0.983208597	0.016791403	0.93982808	0.897810219	0.918338777
279	1	0	1	1	1	0.863112392	0.136887608	1	0.863112392	0.926527456	0.983208597	0.016791403	0.93982808	0.897810219	0.918338777
279	1	0	1	1	1	0.863112392	0.136887608	1	0.863112392	0.926527456	0.983208597	0.016791403	0.93982808	0.897810219	0.918338777
279	1	0	1	1	1	0.863112392	0.136887608	1	0.863112392	0.926527456	0.983208597	0.016791403	0.93982808	0.897810219	0.918338777
279	1	0	1	1	1	0.863112392	0.136887608	1	0.863112392	0.926527456	0.983208597	0.016791403	0.93982808	0.897810219	0.918338777
279	1	0	1	1	1	0.863112392	0.136887608	1	0.863112392	0.926527456	0.983208597	0.016791403	0.93982808	0.897810219	0.918338777
279	1	0	1	1	1	0.863112392	0.136887608	1	0.863112392	0.926527456	0.983208597	0.016791403	0.93982808	0.897810219	0.918338777
279	1	0	1	1	1	0.863112392	0.136887608	1	0.863112392	0.926527456	0.983208597	0.016791403	0.93982808	0.897810219	0.918338777
279	1	0	1	1	1	0.863112392	0.136887608	1	0.863112392	0.926527456	0.983208597	0.016791403	0.93982808	0.897810219	0.918338777
279	1	0	1	1	1	0.863112392	0.136887608	1	0.863112392	0.926527456	0.983208597	0.016791403	0.93982808	0.897810219	0.918338777
279	1	0	1	1	1	0.863112392	0.136887608	1	0.863112392	0.926527456	0.983208597	0.016791403	0.93982808	0.897810219	0.918338777
279	1	0	1	1	1	0.863112392	0.136887608	1	0.863112392	0.926527456	0.983208597	0.016791403	0.93982808	0.897810219	0.918338777
279	1	0	1	1	1	0.863112392	0.136887608	1	0.863112392	0.926527456	0.983208597	0.016791403	0.93982808	0.897810219	0.918338777
279	1	0	1	1	1	0.863112392	0.136887608	1	0.863112392	0.926527456	0.983208597	0.016791403	0.93982808	0.897810219	0.918338777
279	1	0	1	1	1	0.863112392	0.136887608	1	0.863112392	0.926527456	0.983208597	0.016791403	0.93982808	0.897810219	0.918338777
279	1	0	1	1	1	0.863112392	0.136887608	1	0.863112392	0.926527456	0.983208597	0.016791403	0.93982808	0.897810219	0.918338777
279	1	0	1	1	1	0.863112392	0.136887608	1	0.863112392	0.926527456	0.983208597	0.016791403	0.93982808	0.897810219	0.918338777
279	1	0	1	1	1	0.863112392	0.136887608	1	0.863112392	0.926527456	0.983208597	0.016791403	0.93982808	0.897810219	0.918338777
279	1	0	1	1	1	0.863112392	0.136887608	1	0.863112392	0.926527456	0.983208597	0.016791403	0.93982808	0.897810219	0.918338777
279	1	0	1	1	1	0.863112392	0.136887608	1	0.863112392	0.926527456	0.983208597	0.016791403	0.93982808	0.897810219	0.918338777
279	1	0	1	1	1	0.863112392	0.136887608	1	0.863112392	0.926527456	0.983208597	0.016791403	0.93982808	0.897810219	0.918338777
279	1	0	1	1	1	0.863112392	0.136887608	1	0.863112392	0.926527456	0.983208597	0.016791403	0.93982808	0.897810219	0.918338777
279	1	0	1	1	1	0.863112392	0.136887608	1	0.863112392	0.926527456	0.983208597	0.016791403	0.93982808	0.897810219	0.918338777
279	1	0	1	1	1	0.863112392	0.136887608	1	0.863112392	0.926527456	0.983208597	0.016791403	0.93982808	0.897810219	0.918338777
279	1	0	1	1	1	0.863112392	0.136887608	1	0.863112392	0.926527456	0.983208597	0.016791403	0.93982808	0.897810219	0.918338777
279	1	0	1	1	1	0.863112392	0.136887608	1	0.863112392	0.926527456	0.983208597	0.016791403	0.93982808	0.897810219	0.918338777
279	1	0	1	1	1	0.863112392	0.136887608	1	0.863112392	0.926527456	0.983208597	0.016791403	0.93982808	0.897810219	0.918338777
279	1	0	1	1	1	0.863112392	0.136887608	1	0.863112392	0.926527456	0.983208597	0.016791403	0.93982808	0.897810219	0.918338777
279	1	0	1	1	1	0.863112392	0.136887608	1	0.863112392	0.926527456	0.983208597	0.016791403	0.93982808	0.897810219	0.918338777
279	1	0	1	1	1	0.863112392	0.136887608	1	0.863112392	0.926527456	0.983208597	0.016791403	0.93982808	0.897810219	0.918338777
279	1	0	1	1	1	0.863112392	0.136887608	1	0.863112392	0.926527456	0.983208597	0.016791403	0.93982808	0.897810219	0.918338777
279	1	0	1	1	1	0.863112392	0.136887608	1	0.863112392	0.926527456	0.983208597	0.016791403	0.93982808	0.897810219	0.918338777
279	1	0	1	1	1	0.863112392	0.136887608	1	0.863112392	0.926527456	0.983208597	0.016791403	0.93982808	0.897810219	0.918338777
279	1	0	1	1	1	0.863112392	0.136887608	1	0.863112392	0.926527456	0.983208597	0.016791403	0.93982808	0.897810219	0.918338777
279	1	0	1	1	1	0.863112392	0.136887608	1	0.863112392	0.926527456	0.983208597	0.016791403	0.93982808	0.897810219	0.918338777
279	1	0	1	1	1	0.863112392	0.136887608	1	0.863112392	0.926527456	0.983208597	0.016791403	0.93982808	0.897810219	0.918338777
279	1	0	1	1	1	0.863112392	0.136887608	1	0.863112392	0.926527456	0.983208597	0.016791403	0.93982808	0.897810219	0.918338777
279	1	0	1	1	1	0.863112392	0.136887608	1	0.863112392	0.926527456	0.983208597	0.016791403	0.93982808	0.897810219	0.918338777
279	1	0	1	1	1	0.863112392	0.136887608	1	0.863112392	0.926527456	0.983208597	0.016791403	0.93982808	0.897810219	0.918338777
279	1	0	1	1	1	0.863112392	0.136887608	1	0.863112392	0.926527456	0.983208597	0.016791403	0.93982808	0.897810219	0.918338777
279	1	0	1	1	1	0.863112392	0.136887608	1	0.863112392	0.926527456	0.983208597	0.016791403	0.93982808	0.897810219	0.918338777
279	1	0	1	1	1	0.863112392	0.136887608	1	0.863112392	0.926527456	0.983208597	0.016791403	0.93982808	0.897810219	0.918338777
279	1	0	1	1	1	0.863112392	0.136887608	1	0.863112392	0.926527456	0.983208597	0.016791403	0.93982808	0.897810219	0.918338777
279	1	0	1	1	1	0.863112392	0.136887608	1	0.863112392	0.926527456	0.983208597	0.016791403	0.93982808	0.897810219	0.918338777
279	1	0	1	1	1	0.863112392	0.136887608	1	0.863112392	0.926527456	0.983208597	0.016791403	0.93982808	0.897810219	0.918338777
279	1	0	1	1	1	0.863112392	0.136887608	1	0.863112392	0.926527456	0.983208597	0.016791403	0.93982808	0.897810219	0.918338777
279	1	0	1	1	1	0.863112392	0.136887608	1	0.863112392	0.926527456	0.983208597	0.016791403	0.93982808	0.897810219	0.918338777
279	1	0	1	1	1	0.863112392	0.136887608	1	0.863112392	0.926527456	0.983208597	0.016791403	0.93982808	0.897810219	0.918338777
279	1	0	1	1	1	0.863112392	0.136887608	1	0.863112392	0.926527456	0.983208597	0.016791403	0.93982808	0.897810219	0.918338777
279	1	0	1	1	1	0.863112392	0.136887608	1	0.863112392	0.926527456	0.983208597	0.016791403	0.93982808	0.897810219	0.918338777
279	1	0	1	1	1	0.863112392	0.136887608	1	0.863112392	0.926527456	0.983208597	0.016791403	0.93982808	0.897810219	0.918338777
279	1	0	1	1	1	0.863112392	0.136887608	1	0.863112392	0.926527456	0.983208597	0.016791403	0.93982808	0.897810219	0.918338777
279	1	0	1	1	1	0.863112392	0.136887608	1	0.863112392	0.926527456	0.983208597	0.016791403	0.93982808	0.897810219	0.918338777
279	1	0	1	1	1	0.863112392	0.136887608	1	0.863112392	0.926527456	0.983208597	0.016791403	0.93982808	0.897810219	0.918338777
279	1	0	1	1	1	0.863112392	0.136887608	1	0.863112392	0.926527456	0.983208597	0.016791403	0.93982808	0.897810219	0.918338777
279	1	0	1	1	1	0.863112392	0.136887608	1	0.863112392	0.926527456	0.983208597	0.016791403	0.93982808	0.897810219	0.918338777
279	1	0	1	1	1	0.863112392	0.136887608	1	0.863112392	0.926527456	0.983208597	0.016791403	0.93982808	0.897810219	0.918338777
279	1	0	1	1	1	0.863112392	0.136887608	1	0.863112392	0.926527456	0.983208597	0.016791403	0.93982808	0.897810219	0.918338777
279	1	0	1	1	1	0.863112392	0.136887608	1	0.863112392	0.926527456	0.983208597	0.016791403	0.93982808	0.897810219	0.918338777
279	1	0	1	1	1	0.863112392	0.136887608	1	0.863112392	0.926527456	0.983208597	0.016791403	0.93982808	0.897810219	0.918338777
279	1	0	1	1	1	0.863112392	0.136887608	1	0.863112392	0.926527456	0.983208597	0.016791403	0.93982808	0.897810219	0.918338777
279	1	0	1	1	1	0.863112392	0.136887608	1	0.863112392	0.926527456	0.983208597	0.016791403	0.93982808	0.897810219	0.918338777
279	1	0	1	1	1	0.863112392	0.136887608	1	0.863112392	0.926527456	0.983208597	0.016791403	0.93982808	0.897810219	0.918338777
279	1	0	1	1	1	0.863112392	0.136887608	1	0.863112392	0.926527456	0.983208597	0.016791403	0.93982808	0.897810219	0.918338777
279	1	0	1	1	1	0.863112392	0.136887608	1	0.863112392	0.926527456	0.983208597	0.016791403	0.93982808	0.897810219	0.918338777
279	1	0	1	1	1	0.863112392	0.136887608	1	0.863112392	0.926527456	0.983208597	0.016791403	0.93982808	0.897810219	0.918338777
279	1	0	1	1	1	0.863112392	0.136887608	1	0.863112392	0.926527456	0.983208597	0.016791403	0.93982808	0.897810219	0.918338777
279	1	0	1	1	1	0.863112392	0.136887608	1	0.863112392	0.926527456	0.983208597	0.016791403	0.93982808	0.897810219	0.918338777
279	1	0	1	1	1	0.863112392	0.136887608	1	0.863112392	0.926527456	0.983208597	0.016791403	0.93982808	0.897810219	0.918338777
279	1	0	1	1	1	0.863112392	0.136887608	1	0.863112392	0.926527456	0.983208597	0.016791403	0.93982808	0.897810219	0.918338777
279	1	0	1	1	1	0.863112392	0.136887608	1	0.863112392	0.926527456	0.983208597	0.016791403	0.93982808	0.897810219	0.918338777
279	1	0	1	1	1	0.863112392	0.136887608	1	0.863112392	0.926527456	0.983208597	0.016791403	0.93982808	0.897810219	0.918338777
279	1	0	1	1	1	0.863112392	0.136887608	1	0.863112392	0.926527456	0.983208597	0.016791403	0.93982808	0.897810219	0.918338777
279	1	0	1	1	1	0.863112392	0.136887608	1	0.863112392	0.926527456	0.983208597	0.016791403	0.93982808	0.897810219	0.918338777
279	1	0	1	1	1	0.863112392	0.136887608	1	0.863112392	0.926527456	0.983208597	0.016791403	0.93982808	0.897810219	0.918338777
279	1	0	1	1	1	0.863112392	0.136887608	1	0.863112392	0.926527456	0.983208597	0.016791403	0.93982808	0.897810219	0.918338777
279	1	0	1	1	1	0.863112392	0.136887608	1	0.863112392	0.926527456	0.983208597	0.016791403	0.93982808	0.897810219	0.918338777
279	1	0	1	1	1	0.863112392	0.136887608	1	0.863112392	0.926527456	0.983208597	0.016791403	0.93982808	0.897810219	0.918338777
279	1	0	1	1	1	0.863112392	0.136887608	1	0.863112392	0.926527456	0.983208597	0.016791403	0.93982808	0.897810219	0.918338777
279	1	0	1	1	1	0.863112392	0.136887608	1	0.863112392	0.926527456	0.983208597	0.016791403	0.93982808	0.897810219	0.918338777
279	1	0	1	1	1	0.863112392	0.136887608	1	0.863112392	0.926527456	0.983208597	0.016791403	0.93982808	0.897810219	0.918338777
279	1	0	1	1	1	0.863112392	0.136887608	1	0.863112392	0.926527456	0.983208597	0.016791403	0.93982808	0.897810219	0.918338777
279	1	0	1	1	1	0.863112392	0.136887608	1	0.863112392	0.926527456	0.983208597	0.016791403	0.93982808	0.897810219	0.918338777
279	1	0	1	1	1	0.863112392	0.136887608	1	0.863112392	0.926527456	0.983208597	0.016791403	0.93982808	0.897810219	0.918338777
279	1	0	1	1	1	0.863112392	0.136887608	1	0.863112392	0.926527456	0.983208597	0.016791403	0.93982808	0.897810219	0.918338777
279	1	0	1	1	1	0.863112392	0.136887608	1	0.863112392	0.926527456	0.983208597	0.016791403	0.93982808	0.897810219	0.918338777
279	1	0	1	1	1	0.863112392	0.136887608	1	0.863112392	0.926527456	0.983208597	0.016791403	0.93982808	0.897810219	0.918338777
279	1	0	1	1	1	0.863112392	0.136887608	1	0.863112392	0.926527456	0.983208597	0.016791403	0.93982808	0.897810219	0.918338777
279	1	0	1	1	1	0.863112392	0.136887608	1	0.863112392	0.926527456	0.983208597	0.016791403	0.93982808	0.897810219	0.918338777
279	1	0	1	1	1	0.863112392	0.136887608	1	0.863112392	0.926527456	0.983208597	0.016791403	0.93982808	0.897810219	0.918338777
279	1	0	1	1	1	0.863112392	0.136887608	1	0.863112392	0.926527456	0.983208597	0.016791403	0.93982808	0.897810219	0.918338777
279	1	0	1	1	1	0.863112392	0.136887608	1	0.863112392	0.926527456	0.983208597	0.016791403	0.93982808	0.897810219	0.918338777
279	1	0	1	1	1	0.863112392	0.136887608	1	0.863112392	0.926527456	0.983208597	0.016791403	0.93982808	0.897810219	0.918338777
278	1	0	1	1	1	0.876832845	0.123167155	1	0.876832845	0.934375	0.98207954	0.01792046	0.939047619	0.88908927	0.913385827
278	1	0	1	1	1	0.876832845	0.123167155	1	0.876832845	0.934375	0.98207954	0.01792046	0.939047619	0.88908927	0.913385827
278	1	0	1	1	1	0.876832845	0.123167155	1	0.876832845	0.934375	0.98207954	0.01792046	0.939047619	0.88908927	0.913385827
278	1	0	1	1	1	0.876832845	0.123167155	1	0.876832845	0.934375	0.98207954	0.01792046	0.939047619	0.88908927	0.913385827
278	1	0	1	1	1	0.876832845	0.123167155	1	0.876832845	0.934375	0.98207954	0.01792046	0.939047619	0.88908927	0.913385827
278	1	0	1	1	1	0.876832845	0.123167155	1	0.876832845	0.934375	0.98207954	0.01792046	0.939047619	0.88908927	0.913385827
278	1	0	1	1	1	0.876832845	0.123167155	1	0.876832845	0.934375	0.98207954	0.01792046	0.939047619	0.88908927	0.913385827
278	1	0	1	1	1	0.876832845	0.123167155	1	0.876832845	0.934375	0.98207954	0.01792046	0.939047619	0.88908927	0.913385827
278	1	0	1	1	1	0.876832845	0.123167155	1	0.876832845	0.934375	0.98207954	0.01792046	0.939047619	0.88908927	0.913385827
278	1	0	1	1	1	0.876832845	0.123167155	1	0.876832845	0.934375	0.98207954	0.01792046	0.939047619	0.88908927	0.913385827
278	1	0	1	1	1	0.876832845	0.123167155	1	0.876832845	0.934375	0.98207954	0.01792046	0.939047619	0.88908927	0.913385827
278	1	0	1	1	1	0.876832845	0.123167155	1	0.876832845	0.934375	0.98207954	0.01792046	0.939047619	0.88908927	0.913385827
278	1	0	1	1	1	0.876832845	0.123167155	1	0.876832845	0.934375	0.98207954	0.01792046	0.939047619	0.88908927	0.913385827
277	1	0	1	1	1	0.876832845	0.123167155	1	0.876832845	0.934375	0.98207954	0.01792046	0.939047619	0.88908927	0.913385827
277	1	0	1	1	1	0.876832845	0.123167155	1	0.876832845	0.934375	0.98207954	0.01792046	0.939047619	0.88908927	0.913385827
276	1	0	1	1	1	0.875549048	0.124450952	1	0.875549048	0.933645589	0.982269504	0.017730496	0.939105614	0.890794224	0.914312182
276	1	0	1	1	1	0.875549048	0.124450952	1	0.875549048	0.933645589	0.982269504	0.017730496	0.939105614	0.890794224	0.914312182
276	1	0	1	1	1	0.875549048	0.124450952	1	0.875549048	0.933645589	0.982269504	0.017730496	0.939105614	0.890794224	0.914312182
275	1	0	1	1	1	0.878120411	0.121879589	1	0.878120411	0.935105551	0.982177079	0.017822921	0.939163498	0.89009009	0.913968548
275	1	0	1	1	1	0.878120411	0.121879589	1	0.878120411	0.935105551	0.982177079	0.017822921	0.939163498	0.89009009	0.913968548
275	1	0	1	1	1	0.878120411	0.121879589	1	0.878120411	0.935105551	0.982177079	0.017822921	0.939163498	0.89009009	0.913968548
275	1	0	1	1	1	0.878120411	0.121879589	1	0.878120411	0.935105551	0.982177079	0.017822921	0.939163498	0.89009009	0.913968548
274	1	0	1	1	1	0.879411765	0.120588235	1	0.879411765	0.935837246	0.982178787	0.017821213	0.940057088	0.889288929	0.913968548
274	1	0	1	1	1	0.879411765	0.120588235	1	0.879411765	0.935837246	0.982178787	0.017821213	0.940057088	0.889288929	0.913968548
273	1	0	1	1	1	0.880882353	0.119117647	1	0.880882353	0.936669273	0.982082974	0.017917026	0.938330171	0.890189019	0.913625866
273	1	0	1	1	1	0.880882353	0.119117647	1	0.880882353	0.936669273	0.982082974	0.017917026	0.938330171	0.890189019	0.913625866
273	1	0	1	1	1	0.880882353	0.119117647	1	0.880882353	0.936669273	0.982082974	0.017917026	0.938330171	0.890189019	0.913625866
273	1	0	1	1	1	0.880882353	0.119117647	1	0.880882353	0.936669273	0.982082974	0.017917026	0.938330171	0.890189019	0.913625866
273	1	0	1	1	1	0.880882353	0.119117647	1	0.880882353	0.936669273	0.982082974	0.017917026	0.938330171	0.890189019	0.913625866
273	1	0	1	1	1	0.880882353	0.119117647	1	0.880882353	0.936669273	0.982082974	0.017917026	0.938330171	0.890189019	0.913625866
273	1	0	1	1	1	0.880882353	0.119117647	1	0.880882353	0.936669273	0.982082974	0.017917026	0.938330171	0.890189019	0.913625866
273	1	0	1	1	1	0.880882353	0.119117647	1	0.880882353	0.936669273	0.982082974	0.017917026	0.938330171	0.890189019	0.913625866
273	1	0	1	1	1	0.880882353	0.119117647	1	0.880882353	0.936669273	0.982082974	0.017917026	0.938330171	0.890189019	0.913625866
273	1	0	1	1	1	0.880882353	0.119117647	1	0.880882353	0.936669273	0.982082974	0.017917026	0.938330171	0.890189019	0.913625866
273	1	0	1	1	1	0.880882353	0.119117647	1	0.880882353	0.936669273	0.982082974	0.017917026	0.938330171	0.890189019	0.913625866
272	1	0	1	1	1	0.880706922	0.119293078	1	0.880706922	0.936570086	0.982180494	0.017819506	0.940114068	0.889388489	0.914048059
272	1	0	1	1	1	0.880706922	0.119293078	1	0.880706922	0.936570086	0.982180494	0.017819506	0.940114068	0.889388489	0.914048059
272	1	0	1	1	1	0.880706922	0.119293078	1	0.880706922	0.936570086	0.982180494	0.017819506	0.940114068	0.889388489	0.914048059
272	1	0	1	1	1	0.880706922	0.119293078	1	0.880706922	0.936570086	0.982180494	0.017819506	0.940114068	0.889388489	0.914048059
272	1	0	1	1	1	0.880706922	0.119293078	1	0.880706922	0.936570086	0.982180494	0.017819506	0.940114068	0.889388489	0.914048059
272	1	0	1	1	1	0.880706922	0.119293078	1	0.880706922	0.936570086	0.982180494	0.017819506	0.940114068	0.889388489	0.914048059
272	1	0	1	1	1	0.880706922	0.119293078	1	0.880706922	0.936570086	0.982180494	0.017819506	0.940114068	0.889388489	0.914048059
272	1	0	1	1	1	0.880706922	0.119293078	1	0.880706922	0.936570086	0.982180494	0.017819506	0.940114068	0.889388489	0.914048059
272	1	0	1	1	1	0.880706922	0.119293078	1	0.880706922	0.936570086	0.982180494	0.017819506	0.940114068	0.889388489	0.914048059
272	1	0	1	1	1	0.880706922	0.119293078	1	0.880706922	0.936570086	0.982180494	0.017819506	0.940114068	0.889388489	0.914048059
272	1	0	1	1	1	0.880706922	0.119293078	1	0.880706922	0.936570086	0.982180494	0.017819506	0.940114068	0.889388489	0.914048059
272	1	0	1	1	1	0.880706922	0.119293078	1	0.880706922	0.936570086	0.982180494	0.017819506	0.940114068	0.889388489	0.914048059
272	1	0	1	1	1	0.880706922	0.119293078	1	0.880706922	0.936570086	0.982180494	0.017819506	0.940114068	0.889388489	0.914048059
272	1	0	1	1	1	0.880706922	0.119293078	1	0.880706922	0.936570086	0.982180494	0.017819506	0.940114068	0.889388489	0.914048059
272	1	0	1	1	1	0.880706922	0.119293078	1	0.880706922	0.936570086	0.982180494	0.017819506	0.940114068	0.889388489	0.914048059
272	1	0	1	1	1	0.880706922	0.119293078	1	0.880706922	0.936570086	0.982180494	0.017819506	0.940114068	0.889388489	0.914048059
272	1	0	1	1	1	0.880706922	0.119293078	1	0.880706922	0.936570086	0.982180494	0.017819506	0.940114068	0.889388489	0.914048059
272	1	0	1	1	1	0.880706922	0.119293078	1	0.880706922	0.936570086	0.982180494	0.017819506	0.940114068	0.889388489	0.914048059
272	1	0	1	1	1	0.880706922	0.119293078	1	0.880706922	0.936570086	0.982180494	0.017819506	0.940114068	0.889388489	0.914048059
272	1	0	1	1	1	0.880706922	0.119293078	1	0.880706922	0.936570086	0.982180494	0.017819506	0.940114068	0.889388489	0.914048059
272	1	0	1	1	1	0.880706922	0.119293078	1	0.880706922	0.936570086	0.982180494	0.017819506	0.940114068	0.889388489	0.914048059
272	1	0	1	1	1	0.880706922	0.119293078	1	0.880706922	0.936570086	0.982180494	0.017819506	0.940114068	0.889388489	0.914048059
272	1	0	1	1	1	0.880706922	0.119293078	1	0.880706922	0.936570086	0.982180494	0.017819506	0.940114068	0.889388489	0.914048059
272	1	0	1	1	1	0.880706922	0.119293078	1	0.880706922	0.936570086	0.982180494	0.017819506	0.940114068	0.889388489	0.914048059
272	1	0	1	1	1	0.880706922	0.119293078	1	0.880706922	0.936570086	0.982180494	0.017819506	0.940114068	0.889388489	0.914048059
272	1	0	1	1	1	0.880706922	0.119293078	1	0.880706922	0.936570086	0.982180494	0.017819506	0.940114068	0.889388489	0.914048059
272	1	0	1	1	1	0.880706922	0.119293078	1	0.880706922	0.936570086	0.982180494	0.017819506	0.940114068	0.889388489	0.914048059
272	1	0	1	1	1	0.880706922	0.119293078	1	0.880706922	0.936570086	0.982180494	0.017819506	0.940114068	0.889388489	0.914048059
272	1	0	1	1	1	0.880706922	0.119293078	1	0.880706922	0.936570086	0.982180494	0.017819506	0.940114068	0.889388489	0.914048059
272	1	0	1	1	1	0.880706922	0.119293078	1	0.880706922	0.936570086	0.982180494	0.017819506	0.940114068	0.889388489	0.914048059
272	1	0	1	1	1	0.880706922	0.119293078	1	0.880706922	0.936570086	0.982180494	0.017819506	0.940114068	0.889388489	0.914048059
272	1	0	1	1	1	0.880706922	0.119293078	1	0.880706922	0.936570086	0.982180494	0.017819506	0.940114068	0.889388489	0.914048059
272	1	0	1	1	1	0.880706922	0.119293078	1	0.880706922	0.936570086	0.982180494	0.017819506	0.940114068	0.889388489	0.914048059
272	1	0	1	1	1	0.880706922	0.119293078	1	0.880706922	0.936570086	0.982180494	0.017819506	0.940114068	0.889388489	0.914048059
272	1	0	1	1	1	0.880706922	0.119293078	1	0.880706922	0.936570086	0.982180494	0.017819506	0.940114068	0.889388489	0.914048059
272	1	0	1	1	1	0.880706922	0.119293078	1	0.880706922	0.936570086	0.982180494	0.017819506	0.940114068	0.889388489	0.914048059
272	1	0	1	1	1	0.880706922	0.119293078	1	0.880706922	0.936570086	0.982180494	0.017819506	0.940114068	0.889388489	0.914048059
272	1	0	1	1	1	0.880706922	0.119293078	1	0.880706922	0.936570086	0.982180494	0.017819506	0.940114068	0.889388489	0.914048059
272	1	0	1	1	1	0.880706922	0.119293078	1	0.880706922	0.936570086	0.982180494	0.017819506	0.940114068	0.889388489	0.914048059
272	1	0	1	1	1	0.880706922	0.119293078	1	0.880706922	0.936570086	0.982180494	0.017819506	0.940114068	0.889388489	0.914048059
272	1	0	1	1	1	0.880706922	0.119293078	1	0.880706922	0.936570086	0.982180494	0.017819506	0.940114068	0.889388489	0.914048059
272	1	0	1	1	1	0.880706922	0.119293078	1	0.880706922	0.936570086	0.982180494	0.017819506	0.940114068	0.889388489	0.914048059
272	1	0	1	1	1	0.880706922	0.119293078	1	0.880706922	0.936570086	0.982180494	0.017819506	0.940114068	0.889388489	0.914048059
272	1	0	1	1	1	0.880706922	0.119293078	1	0.880706922	0.936570086	0.982180494	0.017819506	0.940114068	0.889388489	0.914048059
272	1	0	1	1	1	0.880706922	0.119293078	1	0.880706922	0.936570086	0.982180494	0.017819506	0.940114068	0.889388489	0.914048059
272	1	0	1	1	1	0.880706922	0.119293078	1	0.880706922	0.936570086	0.982180494	0.017819506	0.940114068	0.889388489	0.914048059
272	1	0	1	1	1	0.880706922	0.119293078	1	0.880706922	0.936570086	0.982180494	0.017819506	0.940114068	0.889388489	0.914048059
271	1	0	1	1	1	0.880882353	0.119117647	1	0.880882353	0.936669273	0.982178787	0.017821213	0.938388626	0.891089109	0.914127424
271	1	0	1	1	1	0.880882353	0.119117647	1	0.880882353	0.936669273	0.982178787	0.017821213	0.938388626	0.891089109	0.914127424
271	1	0	1	1	1	0.880882353	0.119117647	1	0.880882353	0.936669273	0.982178787	0.017821213	0.938388626	0.891089109	0.914127424
271	1	0	1	1	1	0.880882353	0.119117647	1	0.880882353	0.936669273	0.982178787	0.017821213	0.938388626	0.891089109	0.914127424
271	1	0	1	1	1	0.880882353	0.119117647	1	0.880882353	0.936669273	0.982178787	0.017821213	0.938388626	0.891089109	0.914127424
271	1	0	1	1	1	0.880882353	0.119117647	1	0.880882353	0.936669273	0.982178787	0.017821213	0.938388626	0.891089109	0.914127424
271	1	0	1	1	1	0.880882353	0.119117647	1	0.880882353	0.936669273	0.982178787	0.017821213	0.938388626	0.891089109	0.914127424
271	1	0	1	1	1	0.880882353	0.119117647	1	0.880882353	0.936669273	0.982178787	0.017821213	0.938388626	0.891089109	0.914127424
271	1	0	1	1	1	0.880882353	0.119117647	1	0.880882353	0.936669273	0.982178787	0.017821213	0.938388626	0.891089109	0.914127424
271	1	0	1	1	1	0.880882353	0.119117647	1	0.880882353	0.936669273	0.982178787	0.017821213	0.938388626	0.891089109	0.914127424
271	1	0	1	1	1	0.880882353	0.119117647	1	0.880882353	0.936669273	0.982178787	0.017821213	0.938388626	0.891089109	0.914127424
271	1	0	1	1	1	0.880882353	0.119117647	1	0.880882353	0.936669273	0.982178787	0.017821213	0.938388626	0.891089109	0.914127424
271	1	0	1	1	1	0.880882353	0.119117647	1	0.880882353	0.936669273	0.982178787	0.017821213	0.938388626	0.891089109	0.914127424
271	1	0	1	1	1	0.880882353	0.119117647	1	0.880882353	0.936669273	0.982178787	0.017821213	0.938388626	0.891089109	0.914127424
271	1	0	1	1	1	0.880882353	0.119117647	1	0.880882353	0.936669273	0.982178787	0.017821213	0.938388626	0.891089109	0.914127424
271	1	0	1	1	1	0.880882353	0.119117647	1	0.880882353	0.936669273	0.982178787	0.017821213	0.938388626	0.891089109	0.914127424
271	1	0	1	1	1	0.880882353	0.119117647	1	0.880882353	0.936669273	0.982178787	0.017821213	0.938388626	0.891089109	0.914127424
271	1	0	1	1	1	0.880882353	0.119117647	1	0.880882353	0.936669273	0.982178787	0.017821213	0.938388626	0.891089109	0.914127424
271	1	0	1	1	1	0.880882353	0.119117647	1	0.880882353	0.936669273	0.982178787	0.017821213	0.938388626	0.891089109	0.914127424
271	1	0	1	1	1	0.880882353	0.119117647	1	0.880882353	0.936669273	0.982178787	0.017821213	0.938388626	0.891089109	0.914127424
271	1	0	1	1	1	0.880882353	0.119117647	1	0.880882353	0.936669273	0.982178787	0.017821213	0.938388626	0.891089109	0.914127424
271	1	0	1	1	1	0.880882353	0.119117647	1	0.880882353	0.936669273	0.982178787	0.017821213	0.938388626	0.891089109	0.914127424
271	1	0	1	1	1	0.880882353	0.119117647	1	0.880882353	0.936669273	0.982178787	0.017821213	0.938388626	0.891089109	0.914127424
271	1	0	1	1	1	0.880882353	0.119117647	1	0.880882353	0.936669273	0.982178787	0.017821213	0.938388626	0.891089109	0.914127424
271	1	0	1	1	1	0.880882353	0.119117647	1	0.880882353	0.936669273	0.982178787	0.017821213	0.938388626	0.891089109	0.914127424
271	1	0	1	1	1	0.880882353	0.119117647	1	0.880882353	0.936669273	0.982178787	0.017821213	0.938388626	0.891089109	0.914127424
271	1	0	1	1	1	0.880882353	0.119117647	1	0.880882353	0.936669273	0.982178787	0.017821213	0.938388626	0.891089109	0.914127424
271	1	0	1	1	1	0.880882353	0.119117647	1	0.880882353	0.936669273	0.982178787	0.017821213	0.938388626	0.891089109	0.914127424
270	1	0	1	1	1	0.882179676	0.117820324	1	0.882179676	0.937402191	0.982084691	0.017915309	0.938388626	0.89028777	0.913705584
270	1	0	1	1	1	0.882179676	0.117820324	1	0.882179676	0.937402191	0.982084691	0.017915309	0.938388626	0.89028777	0.913705584
270	1	0	1	1	1	0.882179676	0.117820324	1	0.882179676	0.937402191	0.982084691	0.017915309	0.938388626	0.89028777	0.913705584
270	1	0	1	1	1	0.882179676	0.117820324	1	0.882179676	0.937402191	0.982084691	0.017915309	0.938388626	0.89028777	0.913705584
270	1	0	1	1	1	0.882179676	0.117820324	1	0.882179676	0.937402191	0.982084691	0.017915309	0.938388626	0.89028777	0.913705584
270	1	0	1	1	1	0.882179676	0.117820324	1	0.882179676	0.937402191	0.982084691	0.017915309	0.938388626	0.89028777	0.913705584
270	1	0	1	1	1	0.882179676	0.117820324	1	0.882179676	0.937402191	0.982084691	0.017915309	0.938388626	0.89028777	0.913705584
270	1	0	1	1	1	0.882179676	0.117820324	1	0.882179676	0.937402191	0.982084691	0.017915309	0.938388626	0.89028777	0.913705584
270	1	0	1	1	1	0.882179676	0.117820324	1	0.882179676	0.937402191	0.982084691	0.017915309	0.938388626	0.89028777	0.913705584
270	1	0	1	1	1	0.882179676	0.117820324	1	0.882179676	0.937402191	0.982084691	0.017915309	0.938388626	0.89028777	0.913705584
270	1	0	1	1	1	0.882179676	0.117820324	1	0.882179676	0.937402191	0.982084691	0.017915309	0.938388626	0.89028777	0.913705584
270	1	0	1	1	1	0.882179676	0.117820324	1	0.882179676	0.937402191	0.982084691	0.017915309	0.938388626	0.89028777	0.913705584
270	1	0	1	1	1	0.882179676	0.117820324	1	0.882179676	0.937402191	0.982084691	0.017915309	0.938388626	0.89028777	0.913705584
270	1	0	1	1	1	0.882179676	0.117820324	1	0.882179676	0.937402191	0.982084691	0.017915309	0.938388626	0.89028777	0.913705584
270	1	0	1	1	1	0.882179676	0.117820324	1	0.882179676	0.937402191	0.982084691	0.017915309	0.938388626	0.89028777	0.913705584
270	1	0	1	1	1	0.882179676	0.117820324	1	0.882179676	0.937402191	0.982084691	0.017915309	0.938388626	0.89028777	0.913705584
270	1	0	1	1	1	0.882179676	0.117820324	1	0.882179676	0.937402191	0.982084691	0.017915309	0.938388626	0.89028777	0.913705584
270	1	0	1	1	1	0.882179676	0.117820324	1	0.882179676	0.937402191	0.982084691	0.017915309	0.938388626	0.89028777	0.913705584
270	1	0	1	1	1	0.882179676	0.117820324	1	0.882179676	0.937402191	0.982084691	0.017915309	0.938388626	0.89028777	0.913705584
270	1	0	1	1	1	0.882179676	0.117820324	1	0.882179676	0.937402191	0.982084691	0.017915309	0.938388626	0.89028777	0.913705584
270	1	0	1	1	1	0.882179676	0.117820324	1	0.882179676	0.937402191	0.982084691	0.017915309	0.938388626	0.89028777	0.913705584
270	1	0	1	1	1	0.882179676	0.117820324	1	0.882179676	0.937402191	0.982084691	0.017915309	0.938388626	0.89028777	0.913705584
270	1	0	1	1	1	0.882179676	0.117820324	1	0.882179676	0.937402191	0.982084691	0.017915309	0.938388626	0.89028777	0.913705584
270	1	0	1	1	1	0.882179676	0.117820324	1	0.882179676	0.937402191	0.982084691	0.017915309	0.938388626	0.89028777	0.913705584
270	1	0	1	1	1	0.882179676	0.117820324	1	0.882179676	0.937402191	0.982084691	0.017915309	0.938388626	0.89028777	0.913705584
270	1	0	1	1	1	0.882179676	0.117820324	1	0.882179676	0.937402191	0.982084691	0.017915309	0.938388626	0.89028777	0.913705584
270	1	0	1	1	1	0.882179676	0.117820324	1	0.882179676	0.937402191	0.982084691	0.017915309	0.938388626	0.89028777	0.913705584
270	1	0	1	1	1	0.882179676	0.117820324	1	0.882179676	0.937402191	0.982084691	0.017915309	0.938388626	0.89028777	0.913705584
270	1	0	1	1	1	0.882179676	0.117820324	1	0.882179676	0.937402191	0.982084691	0.017915309	0.938388626	0.89028777	0.913705584
270	1	0	1	1	1	0.882179676	0.117820324	1	0.882179676	0.937402191	0.982084691	0.017915309	0.938388626	0.89028777	0.913705584
270	1	0	1	1	1	0.882179676	0.117820324	1	0.882179676	0.937402191	0.982084691	0.017915309	0.938388626	0.89028777	0.913705584
270	1	0	1	1	1	0.882179676	0.117820324	1	0.882179676	0.937402191	0.982084691	0.017915309	0.938388626	0.89028777	0.913705584
270	1	0	1	1	1	0.882179676	0.117820324	1	0.882179676	0.937402191	0.982084691	0.017915309	0.938388626	0.89028777	0.913705584
270	1	0	1	1	1	0.882179676	0.117820324	1	0.882179676	0.937402191	0.982084691	0.017915309	0.938388626	0.89028777	0.913705584
270	1	0	1	1	1	0.882179676	0.117820324	1	0.882179676	0.937402191	0.982084691	0.017915309	0.938388626	0.89028777	0.913705584
270	1	0	1	1	1	0.882179676	0.117820324	1	0.882179676	0.937402191	0.982084691	0.017915309	0.938388626	0.89028777	0.913705584
270	1	0	1	1	1	0.882179676	0.117820324	1	0.882179676	0.937402191	0.982084691	0.017915309	0.938388626	0.89028777	0.913705584
270	1	0	1	1	1	0.882179676	0.117820324	1	0.882179676	0.937402191	0.982084691	0.017915309	0.938388626	0.89028777	0.913705584
270	1	0	1	1	1	0.882179676	0.117820324	1	0.882179676	0.937402191	0.982084691	0.017915309	0.938388626	0.89028777	0.913705584
270	1	0	1	1	1	0.882179676	0.117820324	1	0.882179676	0.937402191	0.982084691	0.017915309	0.938388626	0.89028777	0.913705584
270	1	0	1	1	1	0.882179676	0.117820324	1	0.882179676	0.937402191	0.982084691	0.017915309	0.938388626	0.89028777	0.913705584
270	1	0	1	1	1	0.882179676	0.117820324	1	0.882179676	0.937402191	0.982084691	0.017915309	0.938388626	0.89028777	0.913705584
270	1	0	1	1	1	0.882179676	0.117820324	1	0.882179676	0.937402191	0.982084691	0.017915309	0.938388626	0.89028777	0.913705584
270	1	0	1	1	1	0.882179676	0.117820324	1	0.882179676	0.937402191	0.982084691	0.017915309	0.938388626	0.89028777	0.913705584
270	1	0	1	1	1	0.882179676	0.117820324	1	0.882179676	0.937402191	0.982084691	0.017915309	0.938388626	0.89028777	0.913705584
270	1	0	1	1	1	0.882179676	0.117820324	1	0.882179676	0.937402191	0.982084691	0.017915309	0.938388626	0.89028777	0.913705584
270	1	0	1	1	1	0.882179676	0.117820324	1	0.882179676	0.937402191	0.982084691	0.017915309	0.938388626	0.89028777	0.913705584
270	1	0	1	1	1	0.882179676	0.117820324	1	0.882179676	0.937402191	0.982084691	0.017915309	0.938388626	0.89028777	0.913705584
270	1	0	1	1	1	0.882179676	0.117820324	1	0.882179676	0.937402191	0.982084691	0.017915309	0.938388626	0.89028777	0.913705584
270	1	0	1	1	1	0.882179676	0.117820324	1	0.882179676	0.937402191	0.982084691	0.017915309	0.938388626	0.89028777	0.913705584
270	1	0	1	1	1	0.882179676	0.117820324	1	0.882179676	0.937402191	0.982084691	0.017915309	0.938388626	0.89028777	0.913705584
270	1	0	1	1	1	0.882179676	0.117820324	1	0.882179676	0.937402191	0.982084691	0.017915309	0.938388626	0.89028777	0.913705584
270	1	0	1	1	1	0.882179676	0.117820324	1	0.882179676	0.937402191	0.982084691	0.017915309	0.938388626	0.89028777	0.913705584
270	1	0	1	1	1	0.882179676	0.117820324	1	0.882179676	0.937402191	0.982084691	0.017915309	0.938388626	0.89028777	0.913705584
270	1	0	1	1	1	0.882179676	0.117820324	1	0.882179676	0.937402191	0.982084691	0.017915309	0.938388626	0.89028777	0.913705584
