# Supplementary material for: An Improved Hybrid Feature Selection Algorithm for Electric Charge Recovery Risk
Source: Hindawi journal article supplement (doi:10.1155/2020/8479341), 2020-08-28
Supplement: f1 [file 8479341.f1.zip › 8479341.f1/Experimental Results/201808/LBPSOSEE_results.csv]

features_num	Accuracy_high	Loss_high	Precission_high	Recall_high	F1_high	Accuracy_med	Loss_med	Precission_med	Recall_med	F1_med	Accuracy_low	Loss_low	Precission_low	Recall_low	F1_low
361	1	0	1	1	1	0.721327968	0.278672032	0.831812256	0.811704835	0.821635544	0.865272132	0.134727868	0.411282985	0.932920537	0.570887275
348	1	0	1	1	1	0.847236181	0.152763819	0.946573751	0.884907709	0.914702581	0.882428812	0.117571188	0.393198091	0.796856106	0.526568118
348	1	0	1	1	1	0.847236181	0.152763819	0.946573751	0.884907709	0.914702581	0.882428812	0.117571188	0.393198091	0.796856106	0.526568118
380	1	0	1	1	1	0.804733728	0.195266272	0.992574257	0.806841046	0.890122087	0.927709708	0.072290292	0.781216649	0.56568779	0.656207978
380	1	0	1	1	1	0.804733728	0.195266272	0.992574257	0.806841046	0.890122087	0.927709708	0.072290292	0.781216649	0.56568779	0.656207978
377	1	0	1	1	1	0.844047619	0.155952381	0.978783593	0.856435644	0.913531353	0.930973969	0.069026031	0.592458303	0.848390447	0.697694278
377	1	0	1	1	1	0.844047619	0.155952381	0.978783593	0.856435644	0.913531353	0.930973969	0.069026031	0.592458303	0.848390447	0.697694278
377	1	0	1	1	1	0.844047619	0.155952381	0.978783593	0.856435644	0.913531353	0.930973969	0.069026031	0.592458303	0.848390447	0.697694278
377	1	0	1	1	1	0.844047619	0.155952381	0.978783593	0.856435644	0.913531353	0.930973969	0.069026031	0.592458303	0.848390447	0.697694278
377	1	0	1	1	1	0.844047619	0.155952381	0.978783593	0.856435644	0.913531353	0.930973969	0.069026031	0.592458303	0.848390447	0.697694278
377	1	0	1	1	1	0.844047619	0.155952381	0.978783593	0.856435644	0.913531353	0.930973969	0.069026031	0.592458303	0.848390447	0.697694278
377	1	0	1	1	1	0.844047619	0.155952381	0.978783593	0.856435644	0.913531353	0.930973969	0.069026031	0.592458303	0.848390447	0.697694278
377	1	0	1	1	1	0.844047619	0.155952381	0.978783593	0.856435644	0.913531353	0.930973969	0.069026031	0.592458303	0.848390447	0.697694278
377	1	0	1	1	1	0.844047619	0.155952381	0.978783593	0.856435644	0.913531353	0.930973969	0.069026031	0.592458303	0.848390447	0.697694278
377	1	0	1	1	1	0.844047619	0.155952381	0.978783593	0.856435644	0.913531353	0.930973969	0.069026031	0.592458303	0.848390447	0.697694278
377	1	0	1	1	1	0.844047619	0.155952381	0.978783593	0.856435644	0.913531353	0.930973969	0.069026031	0.592458303	0.848390447	0.697694278
377	1	0	1	1	1	0.844047619	0.155952381	0.978783593	0.856435644	0.913531353	0.930973969	0.069026031	0.592458303	0.848390447	0.697694278
377	1	0	1	1	1	0.844047619	0.155952381	0.978783593	0.856435644	0.913531353	0.930973969	0.069026031	0.592458303	0.848390447	0.697694278
377	1	0	1	1	1	0.844047619	0.155952381	0.978783593	0.856435644	0.913531353	0.930973969	0.069026031	0.592458303	0.848390447	0.697694278
377	1	0	1	1	1	0.844047619	0.155952381	0.978783593	0.856435644	0.913531353	0.930973969	0.069026031	0.592458303	0.848390447	0.697694278
377	1	0	1	1	1	0.844047619	0.155952381	0.978783593	0.856435644	0.913531353	0.930973969	0.069026031	0.592458303	0.848390447	0.697694278
320	1	0	1	1	1	0.851966874	0.148033126	0.991525424	0.857591623	0.919708029	0.941579732	0.058420268	0.566176471	0.924	0.70212766
293	1	0	1	1	1	0.846560847	0.153439153	0.995846314	0.849424269	0.916826004	0.955598067	0.044401933	0.587268994	0.936170213	0.721766562
293	1	0	1	1	1	0.846560847	0.153439153	0.995846314	0.849424269	0.916826004	0.955598067	0.044401933	0.587268994	0.936170213	0.721766562
293	1	0	1	1	1	0.846560847	0.153439153	0.995846314	0.849424269	0.916826004	0.955598067	0.044401933	0.587268994	0.936170213	0.721766562
293	1	0	1	1	1	0.846560847	0.153439153	0.995846314	0.849424269	0.916826004	0.955598067	0.044401933	0.587268994	0.936170213	0.721766562
293	1	0	1	1	1	0.846560847	0.153439153	0.995846314	0.849424269	0.916826004	0.955598067	0.044401933	0.587268994	0.936170213	0.721766562
293	1	0	1	1	1	0.846560847	0.153439153	0.995846314	0.849424269	0.916826004	0.955598067	0.044401933	0.587268994	0.936170213	0.721766562
293	1	0	1	1	1	0.846560847	0.153439153	0.995846314	0.849424269	0.916826004	0.955598067	0.044401933	0.587268994	0.936170213	0.721766562
194	1	0	1	1	1	0.899905571	0.100094429	0.996811902	0.901056676	0.946518668	0.965599761	0.034400239	0.684313725	0.968099861	0.801838024
194	1	0	1	1	1	0.899905571	0.100094429	0.996811902	0.901056676	0.946518668	0.965599761	0.034400239	0.684313725	0.968099861	0.801838024
194	1	0	1	1	1	0.899905571	0.100094429	0.996811902	0.901056676	0.946518668	0.965599761	0.034400239	0.684313725	0.968099861	0.801838024
194	1	0	1	1	1	0.899905571	0.100094429	0.996811902	0.901056676	0.946518668	0.965599761	0.034400239	0.684313725	0.968099861	0.801838024
194	1	0	1	1	1	0.899905571	0.100094429	0.996811902	0.901056676	0.946518668	0.965599761	0.034400239	0.684313725	0.968099861	0.801838024
194	1	0	1	1	1	0.899905571	0.100094429	0.996811902	0.901056676	0.946518668	0.965599761	0.034400239	0.684313725	0.968099861	0.801838024
256	1	0	1	1	1	0.816272966	0.183727034	0.998394864	0.817345598	0.898843931	0.979331659	0.020668341	0.915392457	0.872691934	0.893532338
256	1	0	1	1	1	0.816272966	0.183727034	0.998394864	0.817345598	0.898843931	0.979331659	0.020668341	0.915392457	0.872691934	0.893532338
256	1	0	1	1	1	0.816272966	0.183727034	0.998394864	0.817345598	0.898843931	0.979331659	0.020668341	0.915392457	0.872691934	0.893532338
256	1	0	1	1	1	0.816272966	0.183727034	0.998394864	0.817345598	0.898843931	0.979331659	0.020668341	0.915392457	0.872691934	0.893532338
245	1	0	1	1	1	0.882687927	0.117312073	0.998709677	0.883561644	0.937613568	0.973239574	0.026760426	0.805529075	0.923497268	0.860488798
245	1	0	1	1	1	0.882687927	0.117312073	0.998709677	0.883561644	0.937613568	0.973239574	0.026760426	0.805529075	0.923497268	0.860488798
245	1	0	1	1	1	0.882687927	0.117312073	0.998709677	0.883561644	0.937613568	0.973239574	0.026760426	0.805529075	0.923497268	0.860488798
245	1	0	1	1	1	0.882687927	0.117312073	0.998709677	0.883561644	0.937613568	0.973239574	0.026760426	0.805529075	0.923497268	0.860488798
245	1	0	1	1	1	0.882687927	0.117312073	0.998709677	0.883561644	0.937613568	0.973239574	0.026760426	0.805529075	0.923497268	0.860488798
245	1	0	1	1	1	0.882687927	0.117312073	0.998709677	0.883561644	0.937613568	0.973239574	0.026760426	0.805529075	0.923497268	0.860488798
245	1	0	1	1	1	0.882687927	0.117312073	0.998709677	0.883561644	0.937613568	0.973239574	0.026760426	0.805529075	0.923497268	0.860488798
244	1	0	1	1	1	0.877714286	0.122285714	0.990956072	0.884659746	0.934795856	0.977873507	0.022126493	0.85115304	0.90625	0.877837838
244	1	0	1	1	1	0.877714286	0.122285714	0.990956072	0.884659746	0.934795856	0.977873507	0.022126493	0.85115304	0.90625	0.877837838
244	1	0	1	1	1	0.877714286	0.122285714	0.990956072	0.884659746	0.934795856	0.977873507	0.022126493	0.85115304	0.90625	0.877837838
244	1	0	1	1	1	0.877714286	0.122285714	0.990956072	0.884659746	0.934795856	0.977873507	0.022126493	0.85115304	0.90625	0.877837838
244	1	0	1	1	1	0.877714286	0.122285714	0.990956072	0.884659746	0.934795856	0.977873507	0.022126493	0.85115304	0.90625	0.877837838
244	1	0	1	1	1	0.877714286	0.122285714	0.990956072	0.884659746	0.934795856	0.977873507	0.022126493	0.85115304	0.90625	0.877837838
168	1	0	1	1	1	0.838411819	0.161588181	0.99889989	0.839186691	0.91210447	0.986548426	0.013451574	0.854679803	0.976090014	0.91135916
168	1	0	1	1	1	0.838411819	0.161588181	0.99889989	0.839186691	0.91210447	0.986548426	0.013451574	0.854679803	0.976090014	0.91135916
168	1	0	1	1	1	0.838411819	0.161588181	0.99889989	0.839186691	0.91210447	0.986548426	0.013451574	0.854679803	0.976090014	0.91135916
168	1	0	1	1	1	0.838411819	0.161588181	0.99889989	0.839186691	0.91210447	0.986548426	0.013451574	0.854679803	0.976090014	0.91135916
168	1	0	1	1	1	0.838411819	0.161588181	0.99889989	0.839186691	0.91210447	0.986548426	0.013451574	0.854679803	0.976090014	0.91135916
168	1	0	1	1	1	0.838411819	0.161588181	0.99889989	0.839186691	0.91210447	0.986548426	0.013451574	0.854679803	0.976090014	0.91135916
168	1	0	1	1	1	0.838411819	0.161588181	0.99889989	0.839186691	0.91210447	0.986548426	0.013451574	0.854679803	0.976090014	0.91135916
168	1	0	1	1	1	0.838411819	0.161588181	0.99889989	0.839186691	0.91210447	0.986548426	0.013451574	0.854679803	0.976090014	0.91135916
168	1	0	1	1	1	0.838411819	0.161588181	0.99889989	0.839186691	0.91210447	0.986548426	0.013451574	0.854679803	0.976090014	0.91135916
168	1	0	1	1	1	0.838411819	0.161588181	0.99889989	0.839186691	0.91210447	0.986548426	0.013451574	0.854679803	0.976090014	0.91135916
168	1	0	1	1	1	0.838411819	0.161588181	0.99889989	0.839186691	0.91210447	0.986548426	0.013451574	0.854679803	0.976090014	0.91135916
168	1	0	1	1	1	0.838411819	0.161588181	0.99889989	0.839186691	0.91210447	0.986548426	0.013451574	0.854679803	0.976090014	0.91135916
168	1	0	1	1	1	0.838411819	0.161588181	0.99889989	0.839186691	0.91210447	0.986548426	0.013451574	0.854679803	0.976090014	0.91135916
168	1	0	1	1	1	0.838411819	0.161588181	0.99889989	0.839186691	0.91210447	0.986548426	0.013451574	0.854679803	0.976090014	0.91135916
168	1	0	1	1	1	0.770457698	0.229542302	0.999100719	0.770992366	0.870348609	0.999483311	0.000516689	0.985994398	1	0.992947814
168	1	0	1	1	1	0.770457698	0.229542302	0.999100719	0.770992366	0.870348609	0.999483311	0.000516689	0.985994398	1	0.992947814
172	1	0	1	1	1	0.96149615	0.03850385	0.997716895	0.963616318	0.980370163	0.978452498	0.021547502	0.801084991	1	0.889558233
172	1	0	1	1	1	0.96149615	0.03850385	0.997716895	0.963616318	0.980370163	0.978452498	0.021547502	0.801084991	1	0.889558233
172	1	0	1	1	1	0.96149615	0.03850385	0.997716895	0.963616318	0.980370163	0.978452498	0.021547502	0.801084991	1	0.889558233
172	1	0	1	1	1	0.96149615	0.03850385	0.997716895	0.963616318	0.980370163	0.978452498	0.021547502	0.801084991	1	0.889558233
172	1	0	1	1	1	0.96149615	0.03850385	0.997716895	0.963616318	0.980370163	0.978452498	0.021547502	0.801084991	1	0.889558233
172	1	0	1	1	1	0.96149615	0.03850385	0.997716895	0.963616318	0.980370163	0.978452498	0.021547502	0.801084991	1	0.889558233
172	1	0	1	1	1	0.96149615	0.03850385	0.997716895	0.963616318	0.980370163	0.978452498	0.021547502	0.801084991	1	0.889558233
172	1	0	1	1	1	0.96149615	0.03850385	0.997716895	0.963616318	0.980370163	0.978452498	0.021547502	0.801084991	1	0.889558233
172	1	0	1	1	1	0.96149615	0.03850385	0.997716895	0.963616318	0.980370163	0.978452498	0.021547502	0.801084991	1	0.889558233
172	1	0	1	1	1	0.96149615	0.03850385	0.997716895	0.963616318	0.980370163	0.978452498	0.021547502	0.801084991	1	0.889558233
172	1	0	1	1	1	0.96149615	0.03850385	0.997716895	0.963616318	0.980370163	0.978452498	0.021547502	0.801084991	1	0.889558233
172	1	0	1	1	1	0.96149615	0.03850385	0.997716895	0.963616318	0.980370163	0.978452498	0.021547502	0.801084991	1	0.889558233
172	1	0	1	1	1	0.96149615	0.03850385	0.997716895	0.963616318	0.980370163	0.978452498	0.021547502	0.801084991	1	0.889558233
172	1	0	1	1	1	0.96149615	0.03850385	0.997716895	0.963616318	0.980370163	0.978452498	0.021547502	0.801084991	1	0.889558233
172	1	0	1	1	1	0.96149615	0.03850385	0.997716895	0.963616318	0.980370163	0.978452498	0.021547502	0.801084991	1	0.889558233
172	1	0	1	1	1	0.96149615	0.03850385	0.997716895	0.963616318	0.980370163	0.978452498	0.021547502	0.801084991	1	0.889558233
172	1	0	1	1	1	0.96149615	0.03850385	0.997716895	0.963616318	0.980370163	0.978452498	0.021547502	0.801084991	1	0.889558233
172	1	0	1	1	1	0.96149615	0.03850385	0.997716895	0.963616318	0.980370163	0.978452498	0.021547502	0.801084991	1	0.889558233
172	1	0	1	1	1	0.96149615	0.03850385	0.997716895	0.963616318	0.980370163	0.978452498	0.021547502	0.801084991	1	0.889558233
172	1	0	1	1	1	0.96149615	0.03850385	0.997716895	0.963616318	0.980370163	0.978452498	0.021547502	0.801084991	1	0.889558233
172	1	0	1	1	1	0.96149615	0.03850385	0.997716895	0.963616318	0.980370163	0.978452498	0.021547502	0.801084991	1	0.889558233
172	1	0	1	1	1	0.96149615	0.03850385	0.997716895	0.963616318	0.980370163	0.978452498	0.021547502	0.801084991	1	0.889558233
172	1	0	1	1	1	0.96149615	0.03850385	0.997716895	0.963616318	0.980370163	0.978452498	0.021547502	0.801084991	1	0.889558233
172	1	0	1	1	1	0.96149615	0.03850385	0.997716895	0.963616318	0.980370163	0.978452498	0.021547502	0.801084991	1	0.889558233
172	1	0	1	1	1	0.96149615	0.03850385	0.997716895	0.963616318	0.980370163	0.978452498	0.021547502	0.801084991	1	0.889558233
172	1	0	1	1	1	0.96149615	0.03850385	0.997716895	0.963616318	0.980370163	0.978452498	0.021547502	0.801084991	1	0.889558233
172	1	0	1	1	1	0.96149615	0.03850385	0.997716895	0.963616318	0.980370163	0.978452498	0.021547502	0.801084991	1	0.889558233
172	1	0	1	1	1	0.96149615	0.03850385	0.997716895	0.963616318	0.980370163	0.978452498	0.021547502	0.801084991	1	0.889558233
172	1	0	1	1	1	0.96149615	0.03850385	0.997716895	0.963616318	0.980370163	0.978452498	0.021547502	0.801084991	1	0.889558233
172	1	0	1	1	1	0.96149615	0.03850385	0.997716895	0.963616318	0.980370163	0.978452498	0.021547502	0.801084991	1	0.889558233
172	1	0	1	1	1	0.96149615	0.03850385	0.997716895	0.963616318	0.980370163	0.978452498	0.021547502	0.801084991	1	0.889558233
172	1	0	1	1	1	0.96149615	0.03850385	0.997716895	0.963616318	0.980370163	0.978452498	0.021547502	0.801084991	1	0.889558233
