# Supplementary material for: An Improved Hybrid Feature Selection Algorithm for Electric Charge Recovery Risk
Source: Hindawi journal article supplement (doi:10.1155/2020/8479341), 2020-08-28
Supplement: f1 [file 8479341.f1.zip › 8479341.f1/Experimental Results/201808/LBPSOSEE_SBS_results.csv]

features_num	Accuracy_high	Loss_high	Precission_high	Recall_high	F1_high	Accuracy_med	Loss_med	Precission_med	Recall_med	F1_med	Accuracy_low	Loss_low	Precission_low	Recall_low	F1_low
172	1	0	1	1	1	0.962555066	0.037444934	0.997716895	0.964679912	0.980920314	0.978454608	0.021545392	0.801264679	1	0.889669007
171	1	0	1	1	1	0.963616318	0.036383682	0.997716895	0.965745856	0.981471084	0.978358794	0.021641206	0.800721371	1	0.889334001
171	1	0	1	1	1	0.963616318	0.036383682	0.997716895	0.965745856	0.981471084	0.978358794	0.021641206	0.800721371	1	0.889334001
171	1	0	1	1	1	0.963616318	0.036383682	0.997716895	0.965745856	0.981471084	0.978358794	0.021641206	0.800721371	1	0.889334001
171	1	0	1	1	1	0.963616318	0.036383682	0.997716895	0.965745856	0.981471084	0.978358794	0.021641206	0.800721371	1	0.889334001
171	1	0	1	1	1	0.963616318	0.036383682	0.997716895	0.965745856	0.981471084	0.978358794	0.021641206	0.800721371	1	0.889334001
171	1	0	1	1	1	0.963616318	0.036383682	0.997716895	0.965745856	0.981471084	0.978358794	0.021641206	0.800721371	1	0.889334001
171	1	0	1	1	1	0.963616318	0.036383682	0.997716895	0.965745856	0.981471084	0.978358794	0.021641206	0.800721371	1	0.889334001
170	1	0	1	1	1	0.968957871	0.031042129	0.997716895	0.971111111	0.984234234	0.978369384	0.021630616	0.801615799	1	0.889885401
170	1	0	1	1	1	0.968957871	0.031042129	0.997716895	0.971111111	0.984234234	0.978369384	0.021630616	0.801615799	1	0.889885401
170	1	0	1	1	1	0.968957871	0.031042129	0.997716895	0.971111111	0.984234234	0.978369384	0.021630616	0.801615799	1	0.889885401
170	1	0	1	1	1	0.968957871	0.031042129	0.997716895	0.971111111	0.984234234	0.978369384	0.021630616	0.801615799	1	0.889885401
170	1	0	1	1	1	0.968957871	0.031042129	0.997716895	0.971111111	0.984234234	0.978369384	0.021630616	0.801615799	1	0.889885401
169	1	0	1	1	1	0.971111111	0.028888889	0.997716895	0.973273942	0.985343856	0.978373618	0.021626382	0.801971326	1	0.890104426
169	1	0	1	1	1	0.971111111	0.028888889	0.997716895	0.973273942	0.985343856	0.978373618	0.021626382	0.801971326	1	0.890104426
169	1	0	1	1	1	0.971111111	0.028888889	0.997716895	0.973273942	0.985343856	0.978373618	0.021626382	0.801971326	1	0.890104426
169	1	0	1	1	1	0.971111111	0.028888889	0.997716895	0.973273942	0.985343856	0.978373618	0.021626382	0.801971326	1	0.890104426
169	1	0	1	1	1	0.971111111	0.028888889	0.997716895	0.973273942	0.985343856	0.978373618	0.021626382	0.801971326	1	0.890104426
168	1	0	1	1	1	0.971111111	0.028888889	0.997716895	0.973273942	0.985343856	0.978373618	0.021626382	0.801971326	1	0.890104426
168	1	0	1	1	1	0.971111111	0.028888889	0.997716895	0.973273942	0.985343856	0.978373618	0.021626382	0.801971326	1	0.890104426
168	1	0	1	1	1	0.971111111	0.028888889	0.997716895	0.973273942	0.985343856	0.978373618	0.021626382	0.801971326	1	0.890104426
168	1	0	1	1	1	0.971111111	0.028888889	0.997716895	0.973273942	0.985343856	0.978373618	0.021626382	0.801971326	1	0.890104426
168	1	0	1	1	1	0.971111111	0.028888889	0.997716895	0.973273942	0.985343856	0.978373618	0.021626382	0.801971326	1	0.890104426
168	1	0	1	1	1	0.971111111	0.028888889	0.997716895	0.973273942	0.985343856	0.978373618	0.021626382	0.801971326	1	0.890104426
168	1	0	1	1	1	0.971111111	0.028888889	0.997716895	0.973273942	0.985343856	0.978373618	0.021626382	0.801971326	1	0.890104426
168	1	0	1	1	1	0.971111111	0.028888889	0.997716895	0.973273942	0.985343856	0.978373618	0.021626382	0.801971326	1	0.890104426
168	1	0	1	1	1	0.971111111	0.028888889	0.997716895	0.973273942	0.985343856	0.978373618	0.021626382	0.801971326	1	0.890104426
168	1	0	1	1	1	0.971111111	0.028888889	0.997716895	0.973273942	0.985343856	0.978373618	0.021626382	0.801971326	1	0.890104426
168	1	0	1	1	1	0.971111111	0.028888889	0.997716895	0.973273942	0.985343856	0.978373618	0.021626382	0.801971326	1	0.890104426
168	1	0	1	1	1	0.971111111	0.028888889	0.997716895	0.973273942	0.985343856	0.978373618	0.021626382	0.801971326	1	0.890104426
168	1	0	1	1	1	0.971111111	0.028888889	0.997716895	0.973273942	0.985343856	0.978373618	0.021626382	0.801971326	1	0.890104426
168	1	0	1	1	1	0.971111111	0.028888889	0.997716895	0.973273942	0.985343856	0.978373618	0.021626382	0.801971326	1	0.890104426
168	1	0	1	1	1	0.971111111	0.028888889	0.997716895	0.973273942	0.985343856	0.978373618	0.021626382	0.801971326	1	0.890104426
168	1	0	1	1	1	0.971111111	0.028888889	0.997716895	0.973273942	0.985343856	0.978373618	0.021626382	0.801971326	1	0.890104426
168	1	0	1	1	1	0.971111111	0.028888889	0.997716895	0.973273942	0.985343856	0.978373618	0.021626382	0.801971326	1	0.890104426
168	1	0	1	1	1	0.971111111	0.028888889	0.997716895	0.973273942	0.985343856	0.978373618	0.021626382	0.801971326	1	0.890104426
168	1	0	1	1	1	0.971111111	0.028888889	0.997716895	0.973273942	0.985343856	0.978373618	0.021626382	0.801971326	1	0.890104426
168	1	0	1	1	1	0.971111111	0.028888889	0.997716895	0.973273942	0.985343856	0.978373618	0.021626382	0.801971326	1	0.890104426
168	1	0	1	1	1	0.971111111	0.028888889	0.997716895	0.973273942	0.985343856	0.978373618	0.021626382	0.801971326	1	0.890104426
168	1	0	1	1	1	0.971111111	0.028888889	0.997716895	0.973273942	0.985343856	0.978373618	0.021626382	0.801971326	1	0.890104426
168	1	0	1	1	1	0.971111111	0.028888889	0.997716895	0.973273942	0.985343856	0.978373618	0.021626382	0.801971326	1	0.890104426
168	1	0	1	1	1	0.971111111	0.028888889	0.997716895	0.973273942	0.985343856	0.978373618	0.021626382	0.801971326	1	0.890104426
168	1	0	1	1	1	0.971111111	0.028888889	0.997716895	0.973273942	0.985343856	0.978373618	0.021626382	0.801971326	1	0.890104426
168	1	0	1	1	1	0.971111111	0.028888889	0.997716895	0.973273942	0.985343856	0.978373618	0.021626382	0.801971326	1	0.890104426
168	1	0	1	1	1	0.971111111	0.028888889	0.997716895	0.973273942	0.985343856	0.978373618	0.021626382	0.801971326	1	0.890104426
168	1	0	1	1	1	0.971111111	0.028888889	0.997716895	0.973273942	0.985343856	0.978373618	0.021626382	0.801971326	1	0.890104426
168	1	0	1	1	1	0.971111111	0.028888889	0.997716895	0.973273942	0.985343856	0.978373618	0.021626382	0.801971326	1	0.890104426
168	1	0	1	1	1	0.971111111	0.028888889	0.997716895	0.973273942	0.985343856	0.978373618	0.021626382	0.801971326	1	0.890104426
168	1	0	1	1	1	0.971111111	0.028888889	0.997716895	0.973273942	0.985343856	0.978373618	0.021626382	0.801971326	1	0.890104426
168	1	0	1	1	1	0.971111111	0.028888889	0.997716895	0.973273942	0.985343856	0.978373618	0.021626382	0.801971326	1	0.890104426
168	1	0	1	1	1	0.971111111	0.028888889	0.997716895	0.973273942	0.985343856	0.978373618	0.021626382	0.801971326	1	0.890104426
168	1	0	1	1	1	0.971111111	0.028888889	0.997716895	0.973273942	0.985343856	0.978373618	0.021626382	0.801971326	1	0.890104426
168	1	0	1	1	1	0.971111111	0.028888889	0.997716895	0.973273942	0.985343856	0.978373618	0.021626382	0.801971326	1	0.890104426
168	1	0	1	1	1	0.971111111	0.028888889	0.997716895	0.973273942	0.985343856	0.978373618	0.021626382	0.801971326	1	0.890104426
168	1	0	1	1	1	0.971111111	0.028888889	0.997716895	0.973273942	0.985343856	0.978373618	0.021626382	0.801971326	1	0.890104426
167	1	0	1	1	1	0.971111111	0.028888889	0.997716895	0.973273942	0.985343856	0.978373618	0.021626382	0.801971326	1	0.890104426
167	1	0	1	1	1	0.971111111	0.028888889	0.997716895	0.973273942	0.985343856	0.978373618	0.021626382	0.801971326	1	0.890104426
167	1	0	1	1	1	0.971111111	0.028888889	0.997716895	0.973273942	0.985343856	0.978373618	0.021626382	0.801971326	1	0.890104426
167	1	0	1	1	1	0.971111111	0.028888889	0.997716895	0.973273942	0.985343856	0.978373618	0.021626382	0.801971326	1	0.890104426
167	1	0	1	1	1	0.971111111	0.028888889	0.997716895	0.973273942	0.985343856	0.978373618	0.021626382	0.801971326	1	0.890104426
167	1	0	1	1	1	0.971111111	0.028888889	0.997716895	0.973273942	0.985343856	0.978373618	0.021626382	0.801971326	1	0.890104426
167	1	0	1	1	1	0.971111111	0.028888889	0.997716895	0.973273942	0.985343856	0.978373618	0.021626382	0.801971326	1	0.890104426
167	1	0	1	1	1	0.971111111	0.028888889	0.997716895	0.973273942	0.985343856	0.978373618	0.021626382	0.801971326	1	0.890104426
167	1	0	1	1	1	0.971111111	0.028888889	0.997716895	0.973273942	0.985343856	0.978373618	0.021626382	0.801971326	1	0.890104426
167	1	0	1	1	1	0.971111111	0.028888889	0.997716895	0.973273942	0.985343856	0.978373618	0.021626382	0.801971326	1	0.890104426
167	1	0	1	1	1	0.971111111	0.028888889	0.997716895	0.973273942	0.985343856	0.978373618	0.021626382	0.801971326	1	0.890104426
167	1	0	1	1	1	0.971111111	0.028888889	0.997716895	0.973273942	0.985343856	0.978373618	0.021626382	0.801971326	1	0.890104426
167	1	0	1	1	1	0.971111111	0.028888889	0.997716895	0.973273942	0.985343856	0.978373618	0.021626382	0.801971326	1	0.890104426
167	1	0	1	1	1	0.971111111	0.028888889	0.997716895	0.973273942	0.985343856	0.978373618	0.021626382	0.801971326	1	0.890104426
167	1	0	1	1	1	0.971111111	0.028888889	0.997716895	0.973273942	0.985343856	0.978373618	0.021626382	0.801971326	1	0.890104426
167	1	0	1	1	1	0.971111111	0.028888889	0.997716895	0.973273942	0.985343856	0.978373618	0.021626382	0.801971326	1	0.890104426
167	1	0	1	1	1	0.971111111	0.028888889	0.997716895	0.973273942	0.985343856	0.978373618	0.021626382	0.801971326	1	0.890104426
167	1	0	1	1	1	0.971111111	0.028888889	0.997716895	0.973273942	0.985343856	0.978373618	0.021626382	0.801971326	1	0.890104426
167	1	0	1	1	1	0.971111111	0.028888889	0.997716895	0.973273942	0.985343856	0.978373618	0.021626382	0.801971326	1	0.890104426
167	1	0	1	1	1	0.971111111	0.028888889	0.997716895	0.973273942	0.985343856	0.978373618	0.021626382	0.801971326	1	0.890104426
166	1	0	1	1	1	0.971111111	0.028888889	0.997716895	0.973273942	0.985343856	0.978373618	0.021626382	0.801971326	1	0.890104426
166	1	0	1	1	1	0.971111111	0.028888889	0.997716895	0.973273942	0.985343856	0.978373618	0.021626382	0.801971326	1	0.890104426
166	1	0	1	1	1	0.971111111	0.028888889	0.997716895	0.973273942	0.985343856	0.978373618	0.021626382	0.801971326	1	0.890104426
166	1	0	1	1	1	0.971111111	0.028888889	0.997716895	0.973273942	0.985343856	0.978373618	0.021626382	0.801971326	1	0.890104426
166	1	0	1	1	1	0.971111111	0.028888889	0.997716895	0.973273942	0.985343856	0.978373618	0.021626382	0.801971326	1	0.890104426
166	1	0	1	1	1	0.971111111	0.028888889	0.997716895	0.973273942	0.985343856	0.978373618	0.021626382	0.801971326	1	0.890104426
166	1	0	1	1	1	0.971111111	0.028888889	0.997716895	0.973273942	0.985343856	0.978373618	0.021626382	0.801971326	1	0.890104426
166	1	0	1	1	1	0.971111111	0.028888889	0.997716895	0.973273942	0.985343856	0.978373618	0.021626382	0.801971326	1	0.890104426
166	1	0	1	1	1	0.971111111	0.028888889	0.997716895	0.973273942	0.985343856	0.978373618	0.021626382	0.801971326	1	0.890104426
166	1	0	1	1	1	0.971111111	0.028888889	0.997716895	0.973273942	0.985343856	0.978373618	0.021626382	0.801971326	1	0.890104426
166	1	0	1	1	1	0.971111111	0.028888889	0.997716895	0.973273942	0.985343856	0.978373618	0.021626382	0.801971326	1	0.890104426
166	1	0	1	1	1	0.971111111	0.028888889	0.997716895	0.973273942	0.985343856	0.978373618	0.021626382	0.801971326	1	0.890104426
165	1	0	1	1	1	0.971111111	0.028888889	0.997716895	0.973273942	0.985343856	0.978373618	0.021626382	0.801971326	1	0.890104426
165	1	0	1	1	1	0.971111111	0.028888889	0.997716895	0.973273942	0.985343856	0.978373618	0.021626382	0.801971326	1	0.890104426
165	1	0	1	1	1	0.971111111	0.028888889	0.997716895	0.973273942	0.985343856	0.978373618	0.021626382	0.801971326	1	0.890104426
165	1	0	1	1	1	0.971111111	0.028888889	0.997716895	0.973273942	0.985343856	0.978373618	0.021626382	0.801971326	1	0.890104426
165	1	0	1	1	1	0.971111111	0.028888889	0.997716895	0.973273942	0.985343856	0.978373618	0.021626382	0.801971326	1	0.890104426
165	1	0	1	1	1	0.971111111	0.028888889	0.997716895	0.973273942	0.985343856	0.978373618	0.021626382	0.801971326	1	0.890104426
165	1	0	1	1	1	0.971111111	0.028888889	0.997716895	0.973273942	0.985343856	0.978373618	0.021626382	0.801971326	1	0.890104426
165	1	0	1	1	1	0.971111111	0.028888889	0.997716895	0.973273942	0.985343856	0.978373618	0.021626382	0.801971326	1	0.890104426
165	1	0	1	1	1	0.971111111	0.028888889	0.997716895	0.973273942	0.985343856	0.978373618	0.021626382	0.801971326	1	0.890104426
165	1	0	1	1	1	0.971111111	0.028888889	0.997716895	0.973273942	0.985343856	0.978373618	0.021626382	0.801971326	1	0.890104426
165	1	0	1	1	1	0.971111111	0.028888889	0.997716895	0.973273942	0.985343856	0.978373618	0.021626382	0.801971326	1	0.890104426
164	1	0	1	1	1	0.971111111	0.028888889	0.997716895	0.973273942	0.985343856	0.978373618	0.021626382	0.801971326	1	0.890104426
164	1	0	1	1	1	0.971111111	0.028888889	0.997716895	0.973273942	0.985343856	0.978373618	0.021626382	0.801971326	1	0.890104426
164	1	0	1	1	1	0.971111111	0.028888889	0.997716895	0.973273942	0.985343856	0.978373618	0.021626382	0.801971326	1	0.890104426
164	1	0	1	1	1	0.971111111	0.028888889	0.997716895	0.973273942	0.985343856	0.978373618	0.021626382	0.801971326	1	0.890104426
164	1	0	1	1	1	0.971111111	0.028888889	0.997716895	0.973273942	0.985343856	0.978373618	0.021626382	0.801971326	1	0.890104426
164	1	0	1	1	1	0.971111111	0.028888889	0.997716895	0.973273942	0.985343856	0.978373618	0.021626382	0.801971326	1	0.890104426
164	1	0	1	1	1	0.971111111	0.028888889	0.997716895	0.973273942	0.985343856	0.978373618	0.021626382	0.801971326	1	0.890104426
164	1	0	1	1	1	0.971111111	0.028888889	0.997716895	0.973273942	0.985343856	0.978373618	0.021626382	0.801971326	1	0.890104426
164	1	0	1	1	1	0.971111111	0.028888889	0.997716895	0.973273942	0.985343856	0.978373618	0.021626382	0.801971326	1	0.890104426
164	1	0	1	1	1	0.971111111	0.028888889	0.997716895	0.973273942	0.985343856	0.978373618	0.021626382	0.801971326	1	0.890104426
164	1	0	1	1	1	0.971111111	0.028888889	0.997716895	0.973273942	0.985343856	0.978373618	0.021626382	0.801971326	1	0.890104426
164	1	0	1	1	1	0.971111111	0.028888889	0.997716895	0.973273942	0.985343856	0.978373618	0.021626382	0.801971326	1	0.890104426
164	1	0	1	1	1	0.971111111	0.028888889	0.997716895	0.973273942	0.985343856	0.978373618	0.021626382	0.801971326	1	0.890104426
164	1	0	1	1	1	0.971111111	0.028888889	0.997716895	0.973273942	0.985343856	0.978373618	0.021626382	0.801971326	1	0.890104426
164	1	0	1	1	1	0.971111111	0.028888889	0.997716895	0.973273942	0.985343856	0.978373618	0.021626382	0.801971326	1	0.890104426
164	1	0	1	1	1	0.971111111	0.028888889	0.997716895	0.973273942	0.985343856	0.978373618	0.021626382	0.801971326	1	0.890104426
164	1	0	1	1	1	0.971111111	0.028888889	0.997716895	0.973273942	0.985343856	0.978373618	0.021626382	0.801971326	1	0.890104426
164	1	0	1	1	1	0.971111111	0.028888889	0.997716895	0.973273942	0.985343856	0.978373618	0.021626382	0.801971326	1	0.890104426
164	1	0	1	1	1	0.971111111	0.028888889	0.997716895	0.973273942	0.985343856	0.978373618	0.021626382	0.801971326	1	0.890104426
164	1	0	1	1	1	0.971111111	0.028888889	0.997716895	0.973273942	0.985343856	0.978373618	0.021626382	0.801971326	1	0.890104426
164	1	0	1	1	1	0.971111111	0.028888889	0.997716895	0.973273942	0.985343856	0.978373618	0.021626382	0.801971326	1	0.890104426
164	1	0	1	1	1	0.971111111	0.028888889	0.997716895	0.973273942	0.985343856	0.978373618	0.021626382	0.801971326	1	0.890104426
164	1	0	1	1	1	0.971111111	0.028888889	0.997716895	0.973273942	0.985343856	0.978373618	0.021626382	0.801971326	1	0.890104426
164	1	0	1	1	1	0.971111111	0.028888889	0.997716895	0.973273942	0.985343856	0.978373618	0.021626382	0.801971326	1	0.890104426
164	1	0	1	1	1	0.971111111	0.028888889	0.997716895	0.973273942	0.985343856	0.978373618	0.021626382	0.801971326	1	0.890104426
164	1	0	1	1	1	0.971111111	0.028888889	0.997716895	0.973273942	0.985343856	0.978373618	0.021626382	0.801971326	1	0.890104426
164	1	0	1	1	1	0.971111111	0.028888889	0.997716895	0.973273942	0.985343856	0.978373618	0.021626382	0.801971326	1	0.890104426
164	1	0	1	1	1	0.971111111	0.028888889	0.997716895	0.973273942	0.985343856	0.978373618	0.021626382	0.801971326	1	0.890104426
164	1	0	1	1	1	0.971111111	0.028888889	0.997716895	0.973273942	0.985343856	0.978373618	0.021626382	0.801971326	1	0.890104426
164	1	0	1	1	1	0.971111111	0.028888889	0.997716895	0.973273942	0.985343856	0.978373618	0.021626382	0.801971326	1	0.890104426
164	1	0	1	1	1	0.971111111	0.028888889	0.997716895	0.973273942	0.985343856	0.978373618	0.021626382	0.801971326	1	0.890104426
163	1	0	1	1	1	0.971111111	0.028888889	0.997716895	0.973273942	0.985343856	0.978373618	0.021626382	0.801971326	1	0.890104426
163	1	0	1	1	1	0.971111111	0.028888889	0.997716895	0.973273942	0.985343856	0.978373618	0.021626382	0.801971326	1	0.890104426
163	1	0	1	1	1	0.971111111	0.028888889	0.997716895	0.973273942	0.985343856	0.978373618	0.021626382	0.801971326	1	0.890104426
163	1	0	1	1	1	0.971111111	0.028888889	0.997716895	0.973273942	0.985343856	0.978373618	0.021626382	0.801971326	1	0.890104426
163	1	0	1	1	1	0.971111111	0.028888889	0.997716895	0.973273942	0.985343856	0.978373618	0.021626382	0.801971326	1	0.890104426
163	1	0	1	1	1	0.971111111	0.028888889	0.997716895	0.973273942	0.985343856	0.978373618	0.021626382	0.801971326	1	0.890104426
162	1	0	1	1	1	0.971111111	0.028888889	0.997716895	0.973273942	0.985343856	0.978373618	0.021626382	0.801971326	1	0.890104426
162	1	0	1	1	1	0.971111111	0.028888889	0.997716895	0.973273942	0.985343856	0.978373618	0.021626382	0.801971326	1	0.890104426
162	1	0	1	1	1	0.971111111	0.028888889	0.997716895	0.973273942	0.985343856	0.978373618	0.021626382	0.801971326	1	0.890104426
162	1	0	1	1	1	0.971111111	0.028888889	0.997716895	0.973273942	0.985343856	0.978373618	0.021626382	0.801971326	1	0.890104426
162	1	0	1	1	1	0.971111111	0.028888889	0.997716895	0.973273942	0.985343856	0.978373618	0.021626382	0.801971326	1	0.890104426
162	1	0	1	1	1	0.971111111	0.028888889	0.997716895	0.973273942	0.985343856	0.978373618	0.021626382	0.801971326	1	0.890104426
162	1	0	1	1	1	0.971111111	0.028888889	0.997716895	0.973273942	0.985343856	0.978373618	0.021626382	0.801971326	1	0.890104426
162	1	0	1	1	1	0.971111111	0.028888889	0.997716895	0.973273942	0.985343856	0.978373618	0.021626382	0.801971326	1	0.890104426
162	1	0	1	1	1	0.971111111	0.028888889	0.997716895	0.973273942	0.985343856	0.978373618	0.021626382	0.801971326	1	0.890104426
162	1	0	1	1	1	0.971111111	0.028888889	0.997716895	0.973273942	0.985343856	0.978373618	0.021626382	0.801971326	1	0.890104426
162	1	0	1	1	1	0.971111111	0.028888889	0.997716895	0.973273942	0.985343856	0.978373618	0.021626382	0.801971326	1	0.890104426
162	1	0	1	1	1	0.971111111	0.028888889	0.997716895	0.973273942	0.985343856	0.978373618	0.021626382	0.801971326	1	0.890104426
162	1	0	1	1	1	0.971111111	0.028888889	0.997716895	0.973273942	0.985343856	0.978373618	0.021626382	0.801971326	1	0.890104426
162	1	0	1	1	1	0.971111111	0.028888889	0.997716895	0.973273942	0.985343856	0.978373618	0.021626382	0.801971326	1	0.890104426
161	1	0	1	1	1	0.979820628	0.020179372	0.998855835	0.980898876	0.989795918	0.979172778	0.020827222	0.809139785	1	0.894502229
161	1	0	1	1	1	0.979820628	0.020179372	0.998855835	0.980898876	0.989795918	0.979172778	0.020827222	0.809139785	1	0.894502229
161	1	0	1	1	1	0.979820628	0.020179372	0.998855835	0.980898876	0.989795918	0.979172778	0.020827222	0.809139785	1	0.894502229
161	1	0	1	1	1	0.979820628	0.020179372	0.998855835	0.980898876	0.989795918	0.979172778	0.020827222	0.809139785	1	0.894502229
161	1	0	1	1	1	0.979820628	0.020179372	0.998855835	0.980898876	0.989795918	0.979172778	0.020827222	0.809139785	1	0.894502229
161	1	0	1	1	1	0.979820628	0.020179372	0.998855835	0.980898876	0.989795918	0.979172778	0.020827222	0.809139785	1	0.894502229
161	1	0	1	1	1	0.979820628	0.020179372	0.998855835	0.980898876	0.989795918	0.979172778	0.020827222	0.809139785	1	0.894502229
161	1	0	1	1	1	0.979820628	0.020179372	0.998855835	0.980898876	0.989795918	0.979172778	0.020827222	0.809139785	1	0.894502229
161	1	0	1	1	1	0.979820628	0.020179372	0.998855835	0.980898876	0.989795918	0.979172778	0.020827222	0.809139785	1	0.894502229
161	1	0	1	1	1	0.979820628	0.020179372	0.998855835	0.980898876	0.989795918	0.979172778	0.020827222	0.809139785	1	0.894502229
160	1	0	1	1	1	0.979820628	0.020179372	0.998855835	0.980898876	0.989795918	0.979172778	0.020827222	0.809139785	1	0.894502229
160	1	0	1	1	1	0.979820628	0.020179372	0.998855835	0.980898876	0.989795918	0.979172778	0.020827222	0.809139785	1	0.894502229
159	1	0	1	1	1	0.979820628	0.020179372	0.998855835	0.980898876	0.989795918	0.979172778	0.020827222	0.809139785	1	0.894502229
159	1	0	1	1	1	0.979820628	0.020179372	0.998855835	0.980898876	0.989795918	0.979172778	0.020827222	0.809139785	1	0.894502229
159	1	0	1	1	1	0.979820628	0.020179372	0.998855835	0.980898876	0.989795918	0.979172778	0.020827222	0.809139785	1	0.894502229
158	1	0	1	1	1	0.979820628	0.020179372	0.998855835	0.980898876	0.989795918	0.979172778	0.020827222	0.809139785	1	0.894502229
158	1	0	1	1	1	0.979820628	0.020179372	0.998855835	0.980898876	0.989795918	0.979172778	0.020827222	0.809139785	1	0.894502229
158	1	0	1	1	1	0.979820628	0.020179372	0.998855835	0.980898876	0.989795918	0.979172778	0.020827222	0.809139785	1	0.894502229
158	1	0	1	1	1	0.979820628	0.020179372	0.998855835	0.980898876	0.989795918	0.979172778	0.020827222	0.809139785	1	0.894502229
158	1	0	1	1	1	0.979820628	0.020179372	0.998855835	0.980898876	0.989795918	0.979172778	0.020827222	0.809139785	1	0.894502229
158	1	0	1	1	1	0.979820628	0.020179372	0.998855835	0.980898876	0.989795918	0.979172778	0.020827222	0.809139785	1	0.894502229
157	1	0	1	1	1	0.979820628	0.020179372	0.998855835	0.980898876	0.989795918	0.979172778	0.020827222	0.809139785	1	0.894502229
157	1	0	1	1	1	0.979820628	0.020179372	0.998855835	0.980898876	0.989795918	0.979172778	0.020827222	0.809139785	1	0.894502229
157	1	0	1	1	1	0.979820628	0.020179372	0.998855835	0.980898876	0.989795918	0.979172778	0.020827222	0.809139785	1	0.894502229
157	1	0	1	1	1	0.979820628	0.020179372	0.998855835	0.980898876	0.989795918	0.979172778	0.020827222	0.809139785	1	0.894502229
157	1	0	1	1	1	0.979820628	0.020179372	0.998855835	0.980898876	0.989795918	0.979172778	0.020827222	0.809139785	1	0.894502229
157	1	0	1	1	1	0.979820628	0.020179372	0.998855835	0.980898876	0.989795918	0.979172778	0.020827222	0.809139785	1	0.894502229
157	1	0	1	1	1	0.979820628	0.020179372	0.998855835	0.980898876	0.989795918	0.979172778	0.020827222	0.809139785	1	0.894502229
157	1	0	1	1	1	0.979820628	0.020179372	0.998855835	0.980898876	0.989795918	0.979172778	0.020827222	0.809139785	1	0.894502229
157	1	0	1	1	1	0.979820628	0.020179372	0.998855835	0.980898876	0.989795918	0.979172778	0.020827222	0.809139785	1	0.894502229
157	1	0	1	1	1	0.979820628	0.020179372	0.998855835	0.980898876	0.989795918	0.979172778	0.020827222	0.809139785	1	0.894502229
157	1	0	1	1	1	0.979820628	0.020179372	0.998855835	0.980898876	0.989795918	0.979172778	0.020827222	0.809139785	1	0.894502229
157	1	0	1	1	1	0.979820628	0.020179372	0.998855835	0.980898876	0.989795918	0.979172778	0.020827222	0.809139785	1	0.894502229
157	1	0	1	1	1	0.979820628	0.020179372	0.998855835	0.980898876	0.989795918	0.979172778	0.020827222	0.809139785	1	0.894502229
157	1	0	1	1	1	0.979820628	0.020179372	0.998855835	0.980898876	0.989795918	0.979172778	0.020827222	0.809139785	1	0.894502229
157	1	0	1	1	1	0.979820628	0.020179372	0.998855835	0.980898876	0.989795918	0.979172778	0.020827222	0.809139785	1	0.894502229
157	1	0	1	1	1	0.979820628	0.020179372	0.998855835	0.980898876	0.989795918	0.979172778	0.020827222	0.809139785	1	0.894502229
157	1	0	1	1	1	0.979820628	0.020179372	0.998855835	0.980898876	0.989795918	0.979172778	0.020827222	0.809139785	1	0.894502229
157	1	0	1	1	1	0.979820628	0.020179372	0.998855835	0.980898876	0.989795918	0.979172778	0.020827222	0.809139785	1	0.894502229
157	1	0	1	1	1	0.979820628	0.020179372	0.998855835	0.980898876	0.989795918	0.979172778	0.020827222	0.809139785	1	0.894502229
157	1	0	1	1	1	0.979820628	0.020179372	0.998855835	0.980898876	0.989795918	0.979172778	0.020827222	0.809139785	1	0.894502229
157	1	0	1	1	1	0.979820628	0.020179372	0.998855835	0.980898876	0.989795918	0.979172778	0.020827222	0.809139785	1	0.894502229
157	1	0	1	1	1	0.979820628	0.020179372	0.998855835	0.980898876	0.989795918	0.979172778	0.020827222	0.809139785	1	0.894502229
157	1	0	1	1	1	0.979820628	0.020179372	0.998855835	0.980898876	0.989795918	0.979172778	0.020827222	0.809139785	1	0.894502229
157	1	0	1	1	1	0.979820628	0.020179372	0.998855835	0.980898876	0.989795918	0.979172778	0.020827222	0.809139785	1	0.894502229
157	1	0	1	1	1	0.979820628	0.020179372	0.998855835	0.980898876	0.989795918	0.979172778	0.020827222	0.809139785	1	0.894502229
157	1	0	1	1	1	0.979820628	0.020179372	0.998855835	0.980898876	0.989795918	0.979172778	0.020827222	0.809139785	1	0.894502229
157	1	0	1	1	1	0.979820628	0.020179372	0.998855835	0.980898876	0.989795918	0.979172778	0.020827222	0.809139785	1	0.894502229
157	1	0	1	1	1	0.979820628	0.020179372	0.998855835	0.980898876	0.989795918	0.979172778	0.020827222	0.809139785	1	0.894502229
157	1	0	1	1	1	0.979820628	0.020179372	0.998855835	0.980898876	0.989795918	0.979172778	0.020827222	0.809139785	1	0.894502229
157	1	0	1	1	1	0.979820628	0.020179372	0.998855835	0.980898876	0.989795918	0.979172778	0.020827222	0.809139785	1	0.894502229
157	1	0	1	1	1	0.979820628	0.020179372	0.998855835	0.980898876	0.989795918	0.979172778	0.020827222	0.809139785	1	0.894502229
157	1	0	1	1	1	0.979820628	0.020179372	0.998855835	0.980898876	0.989795918	0.979172778	0.020827222	0.809139785	1	0.894502229
157	1	0	1	1	1	0.979820628	0.020179372	0.998855835	0.980898876	0.989795918	0.979172778	0.020827222	0.809139785	1	0.894502229
157	1	0	1	1	1	0.979820628	0.020179372	0.998855835	0.980898876	0.989795918	0.979172778	0.020827222	0.809139785	1	0.894502229
157	1	0	1	1	1	0.979820628	0.020179372	0.998855835	0.980898876	0.989795918	0.979172778	0.020827222	0.809139785	1	0.894502229
157	1	0	1	1	1	0.979820628	0.020179372	0.998855835	0.980898876	0.989795918	0.979172778	0.020827222	0.809139785	1	0.894502229
157	1	0	1	1	1	0.979820628	0.020179372	0.998855835	0.980898876	0.989795918	0.979172778	0.020827222	0.809139785	1	0.894502229
157	1	0	1	1	1	0.979820628	0.020179372	0.998855835	0.980898876	0.989795918	0.979172778	0.020827222	0.809139785	1	0.894502229
157	1	0	1	1	1	0.979820628	0.020179372	0.998855835	0.980898876	0.989795918	0.979172778	0.020827222	0.809139785	1	0.894502229
157	1	0	1	1	1	0.979820628	0.020179372	0.998855835	0.980898876	0.989795918	0.979172778	0.020827222	0.809139785	1	0.894502229
157	1	0	1	1	1	0.979820628	0.020179372	0.998855835	0.980898876	0.989795918	0.979172778	0.020827222	0.809139785	1	0.894502229
157	1	0	1	1	1	0.979820628	0.020179372	0.998855835	0.980898876	0.989795918	0.979172778	0.020827222	0.809139785	1	0.894502229
157	1	0	1	1	1	0.979820628	0.020179372	0.998855835	0.980898876	0.989795918	0.979172778	0.020827222	0.809139785	1	0.894502229
157	1	0	1	1	1	0.979820628	0.020179372	0.998855835	0.980898876	0.989795918	0.979172778	0.020827222	0.809139785	1	0.894502229
157	1	0	1	1	1	0.979820628	0.020179372	0.998855835	0.980898876	0.989795918	0.979172778	0.020827222	0.809139785	1	0.894502229
157	1	0	1	1	1	0.979820628	0.020179372	0.998855835	0.980898876	0.989795918	0.979172778	0.020827222	0.809139785	1	0.894502229
157	1	0	1	1	1	0.979820628	0.020179372	0.998855835	0.980898876	0.989795918	0.979172778	0.020827222	0.809139785	1	0.894502229
157	1	0	1	1	1	0.979820628	0.020179372	0.998855835	0.980898876	0.989795918	0.979172778	0.020827222	0.809139785	1	0.894502229
157	1	0	1	1	1	0.979820628	0.020179372	0.998855835	0.980898876	0.989795918	0.979172778	0.020827222	0.809139785	1	0.894502229
157	1	0	1	1	1	0.979820628	0.020179372	0.998855835	0.980898876	0.989795918	0.979172778	0.020827222	0.809139785	1	0.894502229
157	1	0	1	1	1	0.979820628	0.020179372	0.998855835	0.980898876	0.989795918	0.979172778	0.020827222	0.809139785	1	0.894502229
157	1	0	1	1	1	0.979820628	0.020179372	0.998855835	0.980898876	0.989795918	0.979172778	0.020827222	0.809139785	1	0.894502229
157	1	0	1	1	1	0.979820628	0.020179372	0.998855835	0.980898876	0.989795918	0.979172778	0.020827222	0.809139785	1	0.894502229
157	1	0	1	1	1	0.979820628	0.020179372	0.998855835	0.980898876	0.989795918	0.979172778	0.020827222	0.809139785	1	0.894502229
157	1	0	1	1	1	0.979820628	0.020179372	0.998855835	0.980898876	0.989795918	0.979172778	0.020827222	0.809139785	1	0.894502229
157	1	0	1	1	1	0.979820628	0.020179372	0.998855835	0.980898876	0.989795918	0.979172778	0.020827222	0.809139785	1	0.894502229
157	1	0	1	1	1	0.979820628	0.020179372	0.998855835	0.980898876	0.989795918	0.979172778	0.020827222	0.809139785	1	0.894502229
157	1	0	1	1	1	0.979820628	0.020179372	0.998855835	0.980898876	0.989795918	0.979172778	0.020827222	0.809139785	1	0.894502229
157	1	0	1	1	1	0.979820628	0.020179372	0.998855835	0.980898876	0.989795918	0.979172778	0.020827222	0.809139785	1	0.894502229
157	1	0	1	1	1	0.979820628	0.020179372	0.998855835	0.980898876	0.989795918	0.979172778	0.020827222	0.809139785	1	0.894502229
157	1	0	1	1	1	0.979820628	0.020179372	0.998855835	0.980898876	0.989795918	0.979172778	0.020827222	0.809139785	1	0.894502229
157	1	0	1	1	1	0.979820628	0.020179372	0.998855835	0.980898876	0.989795918	0.979172778	0.020827222	0.809139785	1	0.894502229
157	1	0	1	1	1	0.979820628	0.020179372	0.998855835	0.980898876	0.989795918	0.979172778	0.020827222	0.809139785	1	0.894502229
157	1	0	1	1	1	0.979820628	0.020179372	0.998855835	0.980898876	0.989795918	0.979172778	0.020827222	0.809139785	1	0.894502229
157	1	0	1	1	1	0.979820628	0.020179372	0.998855835	0.980898876	0.989795918	0.979172778	0.020827222	0.809139785	1	0.894502229
157	1	0	1	1	1	0.979820628	0.020179372	0.998855835	0.980898876	0.989795918	0.979172778	0.020827222	0.809139785	1	0.894502229
157	1	0	1	1	1	0.979820628	0.020179372	0.998855835	0.980898876	0.989795918	0.979172778	0.020827222	0.809139785	1	0.894502229
157	1	0	1	1	1	0.979820628	0.020179372	0.998855835	0.980898876	0.989795918	0.979172778	0.020827222	0.809139785	1	0.894502229
157	1	0	1	1	1	0.979820628	0.020179372	0.998855835	0.980898876	0.989795918	0.979172778	0.020827222	0.809139785	1	0.894502229
157	1	0	1	1	1	0.979820628	0.020179372	0.998855835	0.980898876	0.989795918	0.979172778	0.020827222	0.809139785	1	0.894502229
157	1	0	1	1	1	0.979820628	0.020179372	0.998855835	0.980898876	0.989795918	0.979172778	0.020827222	0.809139785	1	0.894502229
157	1	0	1	1	1	0.979820628	0.020179372	0.998855835	0.980898876	0.989795918	0.979172778	0.020827222	0.809139785	1	0.894502229
157	1	0	1	1	1	0.979820628	0.020179372	0.998855835	0.980898876	0.989795918	0.979172778	0.020827222	0.809139785	1	0.894502229
157	1	0	1	1	1	0.979820628	0.020179372	0.998855835	0.980898876	0.989795918	0.979172778	0.020827222	0.809139785	1	0.894502229
157	1	0	1	1	1	0.979820628	0.020179372	0.998855835	0.980898876	0.989795918	0.979172778	0.020827222	0.809139785	1	0.894502229
157	1	0	1	1	1	0.979820628	0.020179372	0.998855835	0.980898876	0.989795918	0.979172778	0.020827222	0.809139785	1	0.894502229
157	1	0	1	1	1	0.979820628	0.020179372	0.998855835	0.980898876	0.989795918	0.979172778	0.020827222	0.809139785	1	0.894502229
157	1	0	1	1	1	0.979820628	0.020179372	0.998855835	0.980898876	0.989795918	0.979172778	0.020827222	0.809139785	1	0.894502229
157	1	0	1	1	1	0.979820628	0.020179372	0.998855835	0.980898876	0.989795918	0.979172778	0.020827222	0.809139785	1	0.894502229
157	1	0	1	1	1	0.979820628	0.020179372	0.998855835	0.980898876	0.989795918	0.979172778	0.020827222	0.809139785	1	0.894502229
157	1	0	1	1	1	0.979820628	0.020179372	0.998855835	0.980898876	0.989795918	0.979172778	0.020827222	0.809139785	1	0.894502229
157	1	0	1	1	1	0.979820628	0.020179372	0.998855835	0.980898876	0.989795918	0.979172778	0.020827222	0.809139785	1	0.894502229
157	1	0	1	1	1	0.979820628	0.020179372	0.998855835	0.980898876	0.989795918	0.979172778	0.020827222	0.809139785	1	0.894502229
157	1	0	1	1	1	0.979820628	0.020179372	0.998855835	0.980898876	0.989795918	0.979172778	0.020827222	0.809139785	1	0.894502229
157	1	0	1	1	1	0.979820628	0.020179372	0.998855835	0.980898876	0.989795918	0.979172778	0.020827222	0.809139785	1	0.894502229
157	1	0	1	1	1	0.979820628	0.020179372	0.998855835	0.980898876	0.989795918	0.979172778	0.020827222	0.809139785	1	0.894502229
157	1	0	1	1	1	0.979820628	0.020179372	0.998855835	0.980898876	0.989795918	0.979172778	0.020827222	0.809139785	1	0.894502229
157	1	0	1	1	1	0.979820628	0.020179372	0.998855835	0.980898876	0.989795918	0.979172778	0.020827222	0.809139785	1	0.894502229
157	1	0	1	1	1	0.979820628	0.020179372	0.998855835	0.980898876	0.989795918	0.979172778	0.020827222	0.809139785	1	0.894502229
157	1	0	1	1	1	0.979820628	0.020179372	0.998855835	0.980898876	0.989795918	0.979172778	0.020827222	0.809139785	1	0.894502229
157	1	0	1	1	1	0.979820628	0.020179372	0.998855835	0.980898876	0.989795918	0.979172778	0.020827222	0.809139785	1	0.894502229
157	1	0	1	1	1	0.979820628	0.020179372	0.998855835	0.980898876	0.989795918	0.979172778	0.020827222	0.809139785	1	0.894502229
157	1	0	1	1	1	0.979820628	0.020179372	0.998855835	0.980898876	0.989795918	0.979172778	0.020827222	0.809139785	1	0.894502229
157	1	0	1	1	1	0.979820628	0.020179372	0.998855835	0.980898876	0.989795918	0.979172778	0.020827222	0.809139785	1	0.894502229
157	1	0	1	1	1	0.979820628	0.020179372	0.998855835	0.980898876	0.989795918	0.979172778	0.020827222	0.809139785	1	0.894502229
157	1	0	1	1	1	0.979820628	0.020179372	0.998855835	0.980898876	0.989795918	0.979172778	0.020827222	0.809139785	1	0.894502229
157	1	0	1	1	1	0.979820628	0.020179372	0.998855835	0.980898876	0.989795918	0.979172778	0.020827222	0.809139785	1	0.894502229
157	1	0	1	1	1	0.979820628	0.020179372	0.998855835	0.980898876	0.989795918	0.979172778	0.020827222	0.809139785	1	0.894502229
157	1	0	1	1	1	0.979820628	0.020179372	0.998855835	0.980898876	0.989795918	0.979172778	0.020827222	0.809139785	1	0.894502229
157	1	0	1	1	1	0.979820628	0.020179372	0.998855835	0.980898876	0.989795918	0.979172778	0.020827222	0.809139785	1	0.894502229
157	1	0	1	1	1	0.979820628	0.020179372	0.998855835	0.980898876	0.989795918	0.979172778	0.020827222	0.809139785	1	0.894502229
157	1	0	1	1	1	0.979820628	0.020179372	0.998855835	0.980898876	0.989795918	0.979172778	0.020827222	0.809139785	1	0.894502229
157	1	0	1	1	1	0.979820628	0.020179372	0.998855835	0.980898876	0.989795918	0.979172778	0.020827222	0.809139785	1	0.894502229
157	1	0	1	1	1	0.979820628	0.020179372	0.998855835	0.980898876	0.989795918	0.979172778	0.020827222	0.809139785	1	0.894502229
157	1	0	1	1	1	0.979820628	0.020179372	0.998855835	0.980898876	0.989795918	0.979172778	0.020827222	0.809139785	1	0.894502229
157	1	0	1	1	1	0.979820628	0.020179372	0.998855835	0.980898876	0.989795918	0.979172778	0.020827222	0.809139785	1	0.894502229
157	1	0	1	1	1	0.979820628	0.020179372	0.998855835	0.980898876	0.989795918	0.979172778	0.020827222	0.809139785	1	0.894502229
157	1	0	1	1	1	0.979820628	0.020179372	0.998855835	0.980898876	0.989795918	0.979172778	0.020827222	0.809139785	1	0.894502229
157	1	0	1	1	1	0.979820628	0.020179372	0.998855835	0.980898876	0.989795918	0.979172778	0.020827222	0.809139785	1	0.894502229
157	1	0	1	1	1	0.979820628	0.020179372	0.998855835	0.980898876	0.989795918	0.979172778	0.020827222	0.809139785	1	0.894502229
157	1	0	1	1	1	0.979820628	0.020179372	0.998855835	0.980898876	0.989795918	0.979172778	0.020827222	0.809139785	1	0.894502229
157	1	0	1	1	1	0.979820628	0.020179372	0.998855835	0.980898876	0.989795918	0.979172778	0.020827222	0.809139785	1	0.894502229
157	1	0	1	1	1	0.979820628	0.020179372	0.998855835	0.980898876	0.989795918	0.979172778	0.020827222	0.809139785	1	0.894502229
157	1	0	1	1	1	0.979820628	0.020179372	0.998855835	0.980898876	0.989795918	0.979172778	0.020827222	0.809139785	1	0.894502229
157	1	0	1	1	1	0.979820628	0.020179372	0.998855835	0.980898876	0.989795918	0.979172778	0.020827222	0.809139785	1	0.894502229
157	1	0	1	1	1	0.979820628	0.020179372	0.998855835	0.980898876	0.989795918	0.979172778	0.020827222	0.809139785	1	0.894502229
157	1	0	1	1	1	0.979820628	0.020179372	0.998855835	0.980898876	0.989795918	0.979172778	0.020827222	0.809139785	1	0.894502229
157	1	0	1	1	1	0.979820628	0.020179372	0.998855835	0.980898876	0.989795918	0.979172778	0.020827222	0.809139785	1	0.894502229
157	1	0	1	1	1	0.979820628	0.020179372	0.998855835	0.980898876	0.989795918	0.979172778	0.020827222	0.809139785	1	0.894502229
157	1	0	1	1	1	0.979820628	0.020179372	0.998855835	0.980898876	0.989795918	0.979172778	0.020827222	0.809139785	1	0.894502229
157	1	0	1	1	1	0.979820628	0.020179372	0.998855835	0.980898876	0.989795918	0.979172778	0.020827222	0.809139785	1	0.894502229
157	1	0	1	1	1	0.979820628	0.020179372	0.998855835	0.980898876	0.989795918	0.979172778	0.020827222	0.809139785	1	0.894502229
157	1	0	1	1	1	0.979820628	0.020179372	0.998855835	0.980898876	0.989795918	0.979172778	0.020827222	0.809139785	1	0.894502229
157	1	0	1	1	1	0.979820628	0.020179372	0.998855835	0.980898876	0.989795918	0.979172778	0.020827222	0.809139785	1	0.894502229
157	1	0	1	1	1	0.979820628	0.020179372	0.998855835	0.980898876	0.989795918	0.979172778	0.020827222	0.809139785	1	0.894502229
157	1	0	1	1	1	0.979820628	0.020179372	0.998855835	0.980898876	0.989795918	0.979172778	0.020827222	0.809139785	1	0.894502229
157	1	0	1	1	1	0.979820628	0.020179372	0.998855835	0.980898876	0.989795918	0.979172778	0.020827222	0.809139785	1	0.894502229
157	1	0	1	1	1	0.979820628	0.020179372	0.998855835	0.980898876	0.989795918	0.979172778	0.020827222	0.809139785	1	0.894502229
157	1	0	1	1	1	0.979820628	0.020179372	0.998855835	0.980898876	0.989795918	0.979172778	0.020827222	0.809139785	1	0.894502229
157	1	0	1	1	1	0.979820628	0.020179372	0.998855835	0.980898876	0.989795918	0.979172778	0.020827222	0.809139785	1	0.894502229
157	1	0	1	1	1	0.979820628	0.020179372	0.998855835	0.980898876	0.989795918	0.979172778	0.020827222	0.809139785	1	0.894502229
157	1	0	1	1	1	0.979820628	0.020179372	0.998855835	0.980898876	0.989795918	0.979172778	0.020827222	0.809139785	1	0.894502229
157	1	0	1	1	1	0.979820628	0.020179372	0.998855835	0.980898876	0.989795918	0.979172778	0.020827222	0.809139785	1	0.894502229
157	1	0	1	1	1	0.979820628	0.020179372	0.998855835	0.980898876	0.989795918	0.979172778	0.020827222	0.809139785	1	0.894502229
157	1	0	1	1	1	0.979820628	0.020179372	0.998855835	0.980898876	0.989795918	0.979172778	0.020827222	0.809139785	1	0.894502229
157	1	0	1	1	1	0.979820628	0.020179372	0.998855835	0.980898876	0.989795918	0.979172778	0.020827222	0.809139785	1	0.894502229
157	1	0	1	1	1	0.979820628	0.020179372	0.998855835	0.980898876	0.989795918	0.979172778	0.020827222	0.809139785	1	0.894502229
157	1	0	1	1	1	0.979820628	0.020179372	0.998855835	0.980898876	0.989795918	0.979172778	0.020827222	0.809139785	1	0.894502229
157	1	0	1	1	1	0.979820628	0.020179372	0.998855835	0.980898876	0.989795918	0.979172778	0.020827222	0.809139785	1	0.894502229
157	1	0	1	1	1	0.979820628	0.020179372	0.998855835	0.980898876	0.989795918	0.979172778	0.020827222	0.809139785	1	0.894502229
157	1	0	1	1	1	0.979820628	0.020179372	0.998855835	0.980898876	0.989795918	0.979172778	0.020827222	0.809139785	1	0.894502229
157	1	0	1	1	1	0.979820628	0.020179372	0.998855835	0.980898876	0.989795918	0.979172778	0.020827222	0.809139785	1	0.894502229
157	1	0	1	1	1	0.979820628	0.020179372	0.998855835	0.980898876	0.989795918	0.979172778	0.020827222	0.809139785	1	0.894502229
157	1	0	1	1	1	0.979820628	0.020179372	0.998855835	0.980898876	0.989795918	0.979172778	0.020827222	0.809139785	1	0.894502229
157	1	0	1	1	1	0.979820628	0.020179372	0.998855835	0.980898876	0.989795918	0.979172778	0.020827222	0.809139785	1	0.894502229
157	1	0	1	1	1	0.979820628	0.020179372	0.998855835	0.980898876	0.989795918	0.979172778	0.020827222	0.809139785	1	0.894502229
157	1	0	1	1	1	0.979820628	0.020179372	0.998855835	0.980898876	0.989795918	0.979172778	0.020827222	0.809139785	1	0.894502229
157	1	0	1	1	1	0.979820628	0.020179372	0.998855835	0.980898876	0.989795918	0.979172778	0.020827222	0.809139785	1	0.894502229
157	1	0	1	1	1	0.979820628	0.020179372	0.998855835	0.980898876	0.989795918	0.979172778	0.020827222	0.809139785	1	0.894502229
157	1	0	1	1	1	0.979820628	0.020179372	0.998855835	0.980898876	0.989795918	0.979172778	0.020827222	0.809139785	1	0.894502229
157	1	0	1	1	1	0.979820628	0.020179372	0.998855835	0.980898876	0.989795918	0.979172778	0.020827222	0.809139785	1	0.894502229
157	1	0	1	1	1	0.979820628	0.020179372	0.998855835	0.980898876	0.989795918	0.979172778	0.020827222	0.809139785	1	0.894502229
157	1	0	1	1	1	0.979820628	0.020179372	0.998855835	0.980898876	0.989795918	0.979172778	0.020827222	0.809139785	1	0.894502229
157	1	0	1	1	1	0.979820628	0.020179372	0.998855835	0.980898876	0.989795918	0.979172778	0.020827222	0.809139785	1	0.894502229
157	1	0	1	1	1	0.979820628	0.020179372	0.998855835	0.980898876	0.989795918	0.979172778	0.020827222	0.809139785	1	0.894502229
157	1	0	1	1	1	0.979820628	0.020179372	0.998855835	0.980898876	0.989795918	0.979172778	0.020827222	0.809139785	1	0.894502229
157	1	0	1	1	1	0.979820628	0.020179372	0.998855835	0.980898876	0.989795918	0.979172778	0.020827222	0.809139785	1	0.894502229
157	1	0	1	1	1	0.979820628	0.020179372	0.998855835	0.980898876	0.989795918	0.979172778	0.020827222	0.809139785	1	0.894502229
157	1	0	1	1	1	0.979820628	0.020179372	0.998855835	0.980898876	0.989795918	0.979172778	0.020827222	0.809139785	1	0.894502229
157	1	0	1	1	1	0.979820628	0.020179372	0.998855835	0.980898876	0.989795918	0.979172778	0.020827222	0.809139785	1	0.894502229
157	1	0	1	1	1	0.979820628	0.020179372	0.998855835	0.980898876	0.989795918	0.979172778	0.020827222	0.809139785	1	0.894502229
157	1	0	1	1	1	0.979820628	0.020179372	0.998855835	0.980898876	0.989795918	0.979172778	0.020827222	0.809139785	1	0.894502229
157	1	0	1	1	1	0.979820628	0.020179372	0.998855835	0.980898876	0.989795918	0.979172778	0.020827222	0.809139785	1	0.894502229
157	1	0	1	1	1	0.979820628	0.020179372	0.998855835	0.980898876	0.989795918	0.979172778	0.020827222	0.809139785	1	0.894502229
157	1	0	1	1	1	0.979820628	0.020179372	0.998855835	0.980898876	0.989795918	0.979172778	0.020827222	0.809139785	1	0.894502229
157	1	0	1	1	1	0.979820628	0.020179372	0.998855835	0.980898876	0.989795918	0.979172778	0.020827222	0.809139785	1	0.894502229
157	1	0	1	1	1	0.979820628	0.020179372	0.998855835	0.980898876	0.989795918	0.979172778	0.020827222	0.809139785	1	0.894502229
157	1	0	1	1	1	0.979820628	0.020179372	0.998855835	0.980898876	0.989795918	0.979172778	0.020827222	0.809139785	1	0.894502229
157	1	0	1	1	1	0.979820628	0.020179372	0.998855835	0.980898876	0.989795918	0.979172778	0.020827222	0.809139785	1	0.894502229
157	1	0	1	1	1	0.979820628	0.020179372	0.998855835	0.980898876	0.989795918	0.979172778	0.020827222	0.809139785	1	0.894502229
157	1	0	1	1	1	0.979820628	0.020179372	0.998855835	0.980898876	0.989795918	0.979172778	0.020827222	0.809139785	1	0.894502229
157	1	0	1	1	1	0.979820628	0.020179372	0.998855835	0.980898876	0.989795918	0.979172778	0.020827222	0.809139785	1	0.894502229
157	1	0	1	1	1	0.979820628	0.020179372	0.998855835	0.980898876	0.989795918	0.979172778	0.020827222	0.809139785	1	0.894502229
157	1	0	1	1	1	0.979820628	0.020179372	0.998855835	0.980898876	0.989795918	0.979172778	0.020827222	0.809139785	1	0.894502229
157	1	0	1	1	1	0.979820628	0.020179372	0.998855835	0.980898876	0.989795918	0.979172778	0.020827222	0.809139785	1	0.894502229
157	1	0	1	1	1	0.979820628	0.020179372	0.998855835	0.980898876	0.989795918	0.979172778	0.020827222	0.809139785	1	0.894502229
157	1	0	1	1	1	0.979820628	0.020179372	0.998855835	0.980898876	0.989795918	0.979172778	0.020827222	0.809139785	1	0.894502229
157	1	0	1	1	1	0.979820628	0.020179372	0.998855835	0.980898876	0.989795918	0.979172778	0.020827222	0.809139785	1	0.894502229
157	1	0	1	1	1	0.979820628	0.020179372	0.998855835	0.980898876	0.989795918	0.979172778	0.020827222	0.809139785	1	0.894502229
157	1	0	1	1	1	0.979820628	0.020179372	0.998855835	0.980898876	0.989795918	0.979172778	0.020827222	0.809139785	1	0.894502229
157	1	0	1	1	1	0.979820628	0.020179372	0.998855835	0.980898876	0.989795918	0.979172778	0.020827222	0.809139785	1	0.894502229
157	1	0	1	1	1	0.979820628	0.020179372	0.998855835	0.980898876	0.989795918	0.979172778	0.020827222	0.809139785	1	0.894502229
157	1	0	1	1	1	0.979820628	0.020179372	0.998855835	0.980898876	0.989795918	0.979172778	0.020827222	0.809139785	1	0.894502229
157	1	0	1	1	1	0.979820628	0.020179372	0.998855835	0.980898876	0.989795918	0.979172778	0.020827222	0.809139785	1	0.894502229
157	1	0	1	1	1	0.979820628	0.020179372	0.998855835	0.980898876	0.989795918	0.979172778	0.020827222	0.809139785	1	0.894502229
157	1	0	1	1	1	0.979820628	0.020179372	0.998855835	0.980898876	0.989795918	0.979172778	0.020827222	0.809139785	1	0.894502229
157	1	0	1	1	1	0.979820628	0.020179372	0.998855835	0.980898876	0.989795918	0.979172778	0.020827222	0.809139785	1	0.894502229
157	1	0	1	1	1	0.979820628	0.020179372	0.998855835	0.980898876	0.989795918	0.979172778	0.020827222	0.809139785	1	0.894502229
157	1	0	1	1	1	0.979820628	0.020179372	0.998855835	0.980898876	0.989795918	0.979172778	0.020827222	0.809139785	1	0.894502229
157	1	0	1	1	1	0.979820628	0.020179372	0.998855835	0.980898876	0.989795918	0.979172778	0.020827222	0.809139785	1	0.894502229
157	1	0	1	1	1	0.979820628	0.020179372	0.998855835	0.980898876	0.989795918	0.979172778	0.020827222	0.809139785	1	0.894502229
157	1	0	1	1	1	0.979820628	0.020179372	0.998855835	0.980898876	0.989795918	0.979172778	0.020827222	0.809139785	1	0.894502229
157	1	0	1	1	1	0.979820628	0.020179372	0.998855835	0.980898876	0.989795918	0.979172778	0.020827222	0.809139785	1	0.894502229
157	1	0	1	1	1	0.979820628	0.020179372	0.998855835	0.980898876	0.989795918	0.979172778	0.020827222	0.809139785	1	0.894502229
157	1	0	1	1	1	0.979820628	0.020179372	0.998855835	0.980898876	0.989795918	0.979172778	0.020827222	0.809139785	1	0.894502229
157	1	0	1	1	1	0.979820628	0.020179372	0.998855835	0.980898876	0.989795918	0.979172778	0.020827222	0.809139785	1	0.894502229
157	1	0	1	1	1	0.979820628	0.020179372	0.998855835	0.980898876	0.989795918	0.979172778	0.020827222	0.809139785	1	0.894502229
157	1	0	1	1	1	0.979820628	0.020179372	0.998855835	0.980898876	0.989795918	0.979172778	0.020827222	0.809139785	1	0.894502229
157	1	0	1	1	1	0.979820628	0.020179372	0.998855835	0.980898876	0.989795918	0.979172778	0.020827222	0.809139785	1	0.894502229
157	1	0	1	1	1	0.979820628	0.020179372	0.998855835	0.980898876	0.989795918	0.979172778	0.020827222	0.809139785	1	0.894502229
157	1	0	1	1	1	0.979820628	0.020179372	0.998855835	0.980898876	0.989795918	0.979172778	0.020827222	0.809139785	1	0.894502229
157	1	0	1	1	1	0.979820628	0.020179372	0.998855835	0.980898876	0.989795918	0.979172778	0.020827222	0.809139785	1	0.894502229
157	1	0	1	1	1	0.979820628	0.020179372	0.998855835	0.980898876	0.989795918	0.979172778	0.020827222	0.809139785	1	0.894502229
157	1	0	1	1	1	0.979820628	0.020179372	0.998855835	0.980898876	0.989795918	0.979172778	0.020827222	0.809139785	1	0.894502229
157	1	0	1	1	1	0.979820628	0.020179372	0.998855835	0.980898876	0.989795918	0.979172778	0.020827222	0.809139785	1	0.894502229
157	1	0	1	1	1	0.979820628	0.020179372	0.998855835	0.980898876	0.989795918	0.979172778	0.020827222	0.809139785	1	0.894502229
157	1	0	1	1	1	0.979820628	0.020179372	0.998855835	0.980898876	0.989795918	0.979172778	0.020827222	0.809139785	1	0.894502229
157	1	0	1	1	1	0.979820628	0.020179372	0.998855835	0.980898876	0.989795918	0.979172778	0.020827222	0.809139785	1	0.894502229
157	1	0	1	1	1	0.979820628	0.020179372	0.998855835	0.980898876	0.989795918	0.979172778	0.020827222	0.809139785	1	0.894502229
157	1	0	1	1	1	0.979820628	0.020179372	0.998855835	0.980898876	0.989795918	0.979172778	0.020827222	0.809139785	1	0.894502229
157	1	0	1	1	1	0.979820628	0.020179372	0.998855835	0.980898876	0.989795918	0.979172778	0.020827222	0.809139785	1	0.894502229
157	1	0	1	1	1	0.979820628	0.020179372	0.998855835	0.980898876	0.989795918	0.979172778	0.020827222	0.809139785	1	0.894502229
157	1	0	1	1	1	0.979820628	0.020179372	0.998855835	0.980898876	0.989795918	0.979172778	0.020827222	0.809139785	1	0.894502229
157	1	0	1	1	1	0.979820628	0.020179372	0.998855835	0.980898876	0.989795918	0.979172778	0.020827222	0.809139785	1	0.894502229
157	1	0	1	1	1	0.979820628	0.020179372	0.998855835	0.980898876	0.989795918	0.979172778	0.020827222	0.809139785	1	0.894502229
157	1	0	1	1	1	0.979820628	0.020179372	0.998855835	0.980898876	0.989795918	0.979172778	0.020827222	0.809139785	1	0.894502229
157	1	0	1	1	1	0.979820628	0.020179372	0.998855835	0.980898876	0.989795918	0.979172778	0.020827222	0.809139785	1	0.894502229
157	1	0	1	1	1	0.979820628	0.020179372	0.998855835	0.980898876	0.989795918	0.979172778	0.020827222	0.809139785	1	0.894502229
157	1	0	1	1	1	0.979820628	0.020179372	0.998855835	0.980898876	0.989795918	0.979172778	0.020827222	0.809139785	1	0.894502229
157	1	0	1	1	1	0.979820628	0.020179372	0.998855835	0.980898876	0.989795918	0.979172778	0.020827222	0.809139785	1	0.894502229
157	1	0	1	1	1	0.979820628	0.020179372	0.998855835	0.980898876	0.989795918	0.979172778	0.020827222	0.809139785	1	0.894502229
157	1	0	1	1	1	0.979820628	0.020179372	0.998855835	0.980898876	0.989795918	0.979172778	0.020827222	0.809139785	1	0.894502229
157	1	0	1	1	1	0.979820628	0.020179372	0.998855835	0.980898876	0.989795918	0.979172778	0.020827222	0.809139785	1	0.894502229
157	1	0	1	1	1	0.979820628	0.020179372	0.998855835	0.980898876	0.989795918	0.979172778	0.020827222	0.809139785	1	0.894502229
157	1	0	1	1	1	0.979820628	0.020179372	0.998855835	0.980898876	0.989795918	0.979172778	0.020827222	0.809139785	1	0.894502229
157	1	0	1	1	1	0.979820628	0.020179372	0.998855835	0.980898876	0.989795918	0.979172778	0.020827222	0.809139785	1	0.894502229
157	1	0	1	1	1	0.979820628	0.020179372	0.998855835	0.980898876	0.989795918	0.979172778	0.020827222	0.809139785	1	0.894502229
157	1	0	1	1	1	0.979820628	0.020179372	0.998855835	0.980898876	0.989795918	0.979172778	0.020827222	0.809139785	1	0.894502229
157	1	0	1	1	1	0.979820628	0.020179372	0.998855835	0.980898876	0.989795918	0.979172778	0.020827222	0.809139785	1	0.894502229
157	1	0	1	1	1	0.979820628	0.020179372	0.998855835	0.980898876	0.989795918	0.979172778	0.020827222	0.809139785	1	0.894502229
157	1	0	1	1	1	0.979820628	0.020179372	0.998855835	0.980898876	0.989795918	0.979172778	0.020827222	0.809139785	1	0.894502229
157	1	0	1	1	1	0.979820628	0.020179372	0.998855835	0.980898876	0.989795918	0.979172778	0.020827222	0.809139785	1	0.894502229
157	1	0	1	1	1	0.979820628	0.020179372	0.998855835	0.980898876	0.989795918	0.979172778	0.020827222	0.809139785	1	0.894502229
157	1	0	1	1	1	0.979820628	0.020179372	0.998855835	0.980898876	0.989795918	0.979172778	0.020827222	0.809139785	1	0.894502229
157	1	0	1	1	1	0.979820628	0.020179372	0.998855835	0.980898876	0.989795918	0.979172778	0.020827222	0.809139785	1	0.894502229
157	1	0	1	1	1	0.979820628	0.020179372	0.998855835	0.980898876	0.989795918	0.979172778	0.020827222	0.809139785	1	0.894502229
157	1	0	1	1	1	0.979820628	0.020179372	0.998855835	0.980898876	0.989795918	0.979172778	0.020827222	0.809139785	1	0.894502229
157	1	0	1	1	1	0.979820628	0.020179372	0.998855835	0.980898876	0.989795918	0.979172778	0.020827222	0.809139785	1	0.894502229
157	1	0	1	1	1	0.979820628	0.020179372	0.998855835	0.980898876	0.989795918	0.979172778	0.020827222	0.809139785	1	0.894502229
157	1	0	1	1	1	0.979820628	0.020179372	0.998855835	0.980898876	0.989795918	0.979172778	0.020827222	0.809139785	1	0.894502229
157	1	0	1	1	1	0.979820628	0.020179372	0.998855835	0.980898876	0.989795918	0.979172778	0.020827222	0.809139785	1	0.894502229
157	1	0	1	1	1	0.979820628	0.020179372	0.998855835	0.980898876	0.989795918	0.979172778	0.020827222	0.809139785	1	0.894502229
157	1	0	1	1	1	0.979820628	0.020179372	0.998855835	0.980898876	0.989795918	0.979172778	0.020827222	0.809139785	1	0.894502229
157	1	0	1	1	1	0.979820628	0.020179372	0.998855835	0.980898876	0.989795918	0.979172778	0.020827222	0.809139785	1	0.894502229
157	1	0	1	1	1	0.979820628	0.020179372	0.998855835	0.980898876	0.989795918	0.979172778	0.020827222	0.809139785	1	0.894502229
157	1	0	1	1	1	0.979820628	0.020179372	0.998855835	0.980898876	0.989795918	0.979172778	0.020827222	0.809139785	1	0.894502229
157	1	0	1	1	1	0.979820628	0.020179372	0.998855835	0.980898876	0.989795918	0.979172778	0.020827222	0.809139785	1	0.894502229
157	1	0	1	1	1	0.979820628	0.020179372	0.998855835	0.980898876	0.989795918	0.979172778	0.020827222	0.809139785	1	0.894502229
157	1	0	1	1	1	0.979820628	0.020179372	0.998855835	0.980898876	0.989795918	0.979172778	0.020827222	0.809139785	1	0.894502229
157	1	0	1	1	1	0.979820628	0.020179372	0.998855835	0.980898876	0.989795918	0.979172778	0.020827222	0.809139785	1	0.894502229
157	1	0	1	1	1	0.979820628	0.020179372	0.998855835	0.980898876	0.989795918	0.979172778	0.020827222	0.809139785	1	0.894502229
157	1	0	1	1	1	0.979820628	0.020179372	0.998855835	0.980898876	0.989795918	0.979172778	0.020827222	0.809139785	1	0.894502229
157	1	0	1	1	1	0.979820628	0.020179372	0.998855835	0.980898876	0.989795918	0.979172778	0.020827222	0.809139785	1	0.894502229
157	1	0	1	1	1	0.979820628	0.020179372	0.998855835	0.980898876	0.989795918	0.979172778	0.020827222	0.809139785	1	0.894502229
157	1	0	1	1	1	0.979820628	0.020179372	0.998855835	0.980898876	0.989795918	0.979172778	0.020827222	0.809139785	1	0.894502229
157	1	0	1	1	1	0.979820628	0.020179372	0.998855835	0.980898876	0.989795918	0.979172778	0.020827222	0.809139785	1	0.894502229
157	1	0	1	1	1	0.979820628	0.020179372	0.998855835	0.980898876	0.989795918	0.979172778	0.020827222	0.809139785	1	0.894502229
157	1	0	1	1	1	0.979820628	0.020179372	0.998855835	0.980898876	0.989795918	0.979172778	0.020827222	0.809139785	1	0.894502229
157	1	0	1	1	1	0.979820628	0.020179372	0.998855835	0.980898876	0.989795918	0.979172778	0.020827222	0.809139785	1	0.894502229
157	1	0	1	1	1	0.979820628	0.020179372	0.998855835	0.980898876	0.989795918	0.979172778	0.020827222	0.809139785	1	0.894502229
