# Supplementary material for: An Improved Hybrid Feature Selection Algorithm for Electric Charge Recovery Risk
Source: Hindawi journal article supplement (doi:10.1155/2020/8479341), 2020-08-28
Supplement: f1 [file 8479341.f1.zip › 8479341.f1/Experimental Results/201808/NBPSOSEE_results.csv]

features_num	Accuracy_high	Loss_high	Precission_high	Recall_high	F1_high	Accuracy_med	Loss_med	Precission_med	Recall_med	F1_med	Accuracy_low	Loss_low	Precission_low	Recall_low	F1_low
348	1.0	0.0	1.0	1.0	1.0	0.790273556231003	0.20972644376899696	0.9884615384615385	0.7956656346749226	0.8816466552315609	0.9162187210379982	0.08378127896200183	0.8144444444444444	0.49863945578231295	0.6185654008438818
348	1.0	0.0	1.0	1.0	1.0	0.790273556231003	0.20972644376899696	0.9884615384615385	0.7956656346749226	0.8816466552315609	0.9162187210379982	0.08378127896200183	0.8144444444444444	0.49863945578231295	0.6185654008438818
348	1.0	0.0	1.0	1.0	1.0	0.790273556231003	0.20972644376899696	0.9884615384615385	0.7956656346749226	0.8816466552315609	0.9162187210379982	0.08378127896200183	0.8144444444444444	0.49863945578231295	0.6185654008438818
348	1.0	0.0	1.0	1.0	1.0	0.790273556231003	0.20972644376899696	0.9884615384615385	0.7956656346749226	0.8816466552315609	0.9162187210379982	0.08378127896200183	0.8144444444444444	0.49863945578231295	0.6185654008438818
363	1.0	0.0	1.0	1.0	1.0	0.8506944444444444	0.14930555555555558	0.9959183673469387	0.8531468531468531	0.919020715630885	0.9487179487179487	0.05128205128205132	0.639141205615194	0.9010477299185099	0.7478260869565218
363	1.0	0.0	1.0	1.0	1.0	0.8506944444444444	0.14930555555555558	0.9959183673469387	0.8531468531468531	0.919020715630885	0.9487179487179487	0.05128205128205132	0.639141205615194	0.9010477299185099	0.7478260869565218
363	1.0	0.0	1.0	1.0	1.0	0.8506944444444444	0.14930555555555558	0.9959183673469387	0.8531468531468531	0.919020715630885	0.9487179487179487	0.05128205128205132	0.639141205615194	0.9010477299185099	0.7478260869565218
363	1.0	0.0	1.0	1.0	1.0	0.8506944444444444	0.14930555555555558	0.9959183673469387	0.8531468531468531	0.919020715630885	0.9487179487179487	0.05128205128205132	0.639141205615194	0.9010477299185099	0.7478260869565218
363	1.0	0.0	1.0	1.0	1.0	0.8506944444444444	0.14930555555555558	0.9959183673469387	0.8531468531468531	0.919020715630885	0.9487179487179487	0.05128205128205132	0.639141205615194	0.9010477299185099	0.7478260869565218
363	1.0	0.0	1.0	1.0	1.0	0.8506944444444444	0.14930555555555558	0.9959183673469387	0.8531468531468531	0.919020715630885	0.9487179487179487	0.05128205128205132	0.639141205615194	0.9010477299185099	0.7478260869565218
363	1.0	0.0	1.0	1.0	1.0	0.8506944444444444	0.14930555555555558	0.9959183673469387	0.8531468531468531	0.919020715630885	0.9487179487179487	0.05128205128205132	0.639141205615194	0.9010477299185099	0.7478260869565218
363	1.0	0.0	1.0	1.0	1.0	0.8506944444444444	0.14930555555555558	0.9959183673469387	0.8531468531468531	0.919020715630885	0.9487179487179487	0.05128205128205132	0.639141205615194	0.9010477299185099	0.7478260869565218
363	1.0	0.0	1.0	1.0	1.0	0.8506944444444444	0.14930555555555558	0.9959183673469387	0.8531468531468531	0.919020715630885	0.9487179487179487	0.05128205128205132	0.639141205615194	0.9010477299185099	0.7478260869565218
363	1.0	0.0	1.0	1.0	1.0	0.8506944444444444	0.14930555555555558	0.9959183673469387	0.8531468531468531	0.919020715630885	0.9487179487179487	0.05128205128205132	0.639141205615194	0.9010477299185099	0.7478260869565218
363	1.0	0.0	1.0	1.0	1.0	0.8506944444444444	0.14930555555555558	0.9959183673469387	0.8531468531468531	0.919020715630885	0.9487179487179487	0.05128205128205132	0.639141205615194	0.9010477299185099	0.7478260869565218
363	1.0	0.0	1.0	1.0	1.0	0.8506944444444444	0.14930555555555558	0.9959183673469387	0.8531468531468531	0.919020715630885	0.9487179487179487	0.05128205128205132	0.639141205615194	0.9010477299185099	0.7478260869565218
363	1.0	0.0	1.0	1.0	1.0	0.8506944444444444	0.14930555555555558	0.9959183673469387	0.8531468531468531	0.919020715630885	0.9487179487179487	0.05128205128205132	0.639141205615194	0.9010477299185099	0.7478260869565218
363	1.0	0.0	1.0	1.0	1.0	0.8506944444444444	0.14930555555555558	0.9959183673469387	0.8531468531468531	0.919020715630885	0.9487179487179487	0.05128205128205132	0.639141205615194	0.9010477299185099	0.7478260869565218
363	1.0	0.0	1.0	1.0	1.0	0.8506944444444444	0.14930555555555558	0.9959183673469387	0.8531468531468531	0.919020715630885	0.9487179487179487	0.05128205128205132	0.639141205615194	0.9010477299185099	0.7478260869565218
363	1.0	0.0	1.0	1.0	1.0	0.8506944444444444	0.14930555555555558	0.9959183673469387	0.8531468531468531	0.919020715630885	0.9487179487179487	0.05128205128205132	0.639141205615194	0.9010477299185099	0.7478260869565218
363	1.0	0.0	1.0	1.0	1.0	0.8506944444444444	0.14930555555555558	0.9959183673469387	0.8531468531468531	0.919020715630885	0.9487179487179487	0.05128205128205132	0.639141205615194	0.9010477299185099	0.7478260869565218
110	1.0	0.0	1.0	1.0	1.0	0.9012584704743466	0.0987415295256534	0.9924078091106291	0.905940594059406	0.9472049689440994	0.9446153846153846	0.055384615384615365	0.5837245696400626	0.966321243523316	0.7278048780487805
110	1.0	0.0	1.0	1.0	1.0	0.9012584704743466	0.0987415295256534	0.9924078091106291	0.905940594059406	0.9472049689440994	0.9446153846153846	0.055384615384615365	0.5837245696400626	0.966321243523316	0.7278048780487805
97	1.0	0.0	1.0	1.0	1.0	0.8052325581395349	0.19476744186046513	0.9972997299729973	0.8069919883466861	0.892109500805153	0.9829621266550344	0.01703787334496565	0.7387218045112782	0.9357142857142857	0.8256302521008404
97	1.0	0.0	1.0	1.0	1.0	0.8052325581395349	0.19476744186046513	0.9972997299729973	0.8069919883466861	0.892109500805153	0.9829621266550344	0.01703787334496565	0.7387218045112782	0.9357142857142857	0.8256302521008404
62	1.0	0.0	1.0	1.0	1.0	0.9470074812967582	0.05299251870324184	1.0	0.9470074812967582	0.9727825808517452	0.9981082501313715	0.0018917498686285006	0.9130434782608695	1.0	0.9545454545454545
62	1.0	0.0	1.0	1.0	1.0	0.9470074812967582	0.05299251870324184	1.0	0.9470074812967582	0.9727825808517452	0.9981082501313715	0.0018917498686285006	0.9130434782608695	1.0	0.9545454545454545
62	1.0	0.0	1.0	1.0	1.0	0.9470074812967582	0.05299251870324184	1.0	0.9470074812967582	0.9727825808517452	0.9981082501313715	0.0018917498686285006	0.9130434782608695	1.0	0.9545454545454545
62	1.0	0.0	1.0	1.0	1.0	0.9470074812967582	0.05299251870324184	1.0	0.9470074812967582	0.9727825808517452	0.9981082501313715	0.0018917498686285006	0.9130434782608695	1.0	0.9545454545454545
62	1.0	0.0	1.0	1.0	1.0	0.9470074812967582	0.05299251870324184	1.0	0.9470074812967582	0.9727825808517452	0.9981082501313715	0.0018917498686285006	0.9130434782608695	1.0	0.9545454545454545
62	1.0	0.0	1.0	1.0	1.0	0.9470074812967582	0.05299251870324184	1.0	0.9470074812967582	0.9727825808517452	0.9981082501313715	0.0018917498686285006	0.9130434782608695	1.0	0.9545454545454545
62	1.0	0.0	1.0	1.0	1.0	0.9470074812967582	0.05299251870324184	1.0	0.9470074812967582	0.9727825808517452	0.9981082501313715	0.0018917498686285006	0.9130434782608695	1.0	0.9545454545454545
62	1.0	0.0	1.0	1.0	1.0	0.9470074812967582	0.05299251870324184	1.0	0.9470074812967582	0.9727825808517452	0.9981082501313715	0.0018917498686285006	0.9130434782608695	1.0	0.9545454545454545
62	1.0	0.0	1.0	1.0	1.0	0.9470074812967582	0.05299251870324184	1.0	0.9470074812967582	0.9727825808517452	0.9981082501313715	0.0018917498686285006	0.9130434782608695	1.0	0.9545454545454545
62	1.0	0.0	1.0	1.0	1.0	0.9470074812967582	0.05299251870324184	1.0	0.9470074812967582	0.9727825808517452	0.9981082501313715	0.0018917498686285006	0.9130434782608695	1.0	0.9545454545454545
62	1.0	0.0	1.0	1.0	1.0	0.9470074812967582	0.05299251870324184	1.0	0.9470074812967582	0.9727825808517452	0.9981082501313715	0.0018917498686285006	0.9130434782608695	1.0	0.9545454545454545
62	1.0	0.0	1.0	1.0	1.0	0.9470074812967582	0.05299251870324184	1.0	0.9470074812967582	0.9727825808517452	0.9981082501313715	0.0018917498686285006	0.9130434782608695	1.0	0.9545454545454545
62	1.0	0.0	1.0	1.0	1.0	0.9470074812967582	0.05299251870324184	1.0	0.9470074812967582	0.9727825808517452	0.9981082501313715	0.0018917498686285006	0.9130434782608695	1.0	0.9545454545454545
62	1.0	0.0	1.0	1.0	1.0	0.9470074812967582	0.05299251870324184	1.0	0.9470074812967582	0.9727825808517452	0.9981082501313715	0.0018917498686285006	0.9130434782608695	1.0	0.9545454545454545
62	1.0	0.0	1.0	1.0	1.0	0.9470074812967582	0.05299251870324184	1.0	0.9470074812967582	0.9727825808517452	0.9981082501313715	0.0018917498686285006	0.9130434782608695	1.0	0.9545454545454545
62	1.0	0.0	1.0	1.0	1.0	0.9470074812967582	0.05299251870324184	1.0	0.9470074812967582	0.9727825808517452	0.9981082501313715	0.0018917498686285006	0.9130434782608695	1.0	0.9545454545454545
62	1.0	0.0	1.0	1.0	1.0	0.9470074812967582	0.05299251870324184	1.0	0.9470074812967582	0.9727825808517452	0.9981082501313715	0.0018917498686285006	0.9130434782608695	1.0	0.9545454545454545
62	1.0	0.0	1.0	1.0	1.0	0.9470074812967582	0.05299251870324184	1.0	0.9470074812967582	0.9727825808517452	0.9981082501313715	0.0018917498686285006	0.9130434782608695	1.0	0.9545454545454545
62	1.0	0.0	1.0	1.0	1.0	0.9470074812967582	0.05299251870324184	1.0	0.9470074812967582	0.9727825808517452	0.9981082501313715	0.0018917498686285006	0.9130434782608695	1.0	0.9545454545454545
62	1.0	0.0	1.0	1.0	1.0	0.9470074812967582	0.05299251870324184	1.0	0.9470074812967582	0.9727825808517452	0.9981082501313715	0.0018917498686285006	0.9130434782608695	1.0	0.9545454545454545
62	1.0	0.0	1.0	1.0	1.0	0.9470074812967582	0.05299251870324184	1.0	0.9470074812967582	0.9727825808517452	0.9981082501313715	0.0018917498686285006	0.9130434782608695	1.0	0.9545454545454545
62	1.0	0.0	1.0	1.0	1.0	0.9470074812967582	0.05299251870324184	1.0	0.9470074812967582	0.9727825808517452	0.9981082501313715	0.0018917498686285006	0.9130434782608695	1.0	0.9545454545454545
62	1.0	0.0	1.0	1.0	1.0	0.9470074812967582	0.05299251870324184	1.0	0.9470074812967582	0.9727825808517452	0.9981082501313715	0.0018917498686285006	0.9130434782608695	1.0	0.9545454545454545
62	1.0	0.0	1.0	1.0	1.0	0.9470074812967582	0.05299251870324184	1.0	0.9470074812967582	0.9727825808517452	0.9981082501313715	0.0018917498686285006	0.9130434782608695	1.0	0.9545454545454545
62	1.0	0.0	1.0	1.0	1.0	0.9470074812967582	0.05299251870324184	1.0	0.9470074812967582	0.9727825808517452	0.9981082501313715	0.0018917498686285006	0.9130434782608695	1.0	0.9545454545454545
62	1.0	0.0	1.0	1.0	1.0	0.9470074812967582	0.05299251870324184	1.0	0.9470074812967582	0.9727825808517452	0.9981082501313715	0.0018917498686285006	0.9130434782608695	1.0	0.9545454545454545
62	1.0	0.0	1.0	1.0	1.0	0.9470074812967582	0.05299251870324184	1.0	0.9470074812967582	0.9727825808517452	0.9981082501313715	0.0018917498686285006	0.9130434782608695	1.0	0.9545454545454545
62	1.0	0.0	1.0	1.0	1.0	0.9470074812967582	0.05299251870324184	1.0	0.9470074812967582	0.9727825808517452	0.9981082501313715	0.0018917498686285006	0.9130434782608695	1.0	0.9545454545454545
62	1.0	0.0	1.0	1.0	1.0	0.9470074812967582	0.05299251870324184	1.0	0.9470074812967582	0.9727825808517452	0.9981082501313715	0.0018917498686285006	0.9130434782608695	1.0	0.9545454545454545
62	1.0	0.0	1.0	1.0	1.0	0.9470074812967582	0.05299251870324184	1.0	0.9470074812967582	0.9727825808517452	0.9981082501313715	0.0018917498686285006	0.9130434782608695	1.0	0.9545454545454545
62	1.0	0.0	1.0	1.0	1.0	0.9470074812967582	0.05299251870324184	1.0	0.9470074812967582	0.9727825808517452	0.9981082501313715	0.0018917498686285006	0.9130434782608695	1.0	0.9545454545454545
69	1.0	0.0	1.0	1.0	1.0	0.8724304715840387	0.12756952841596125	1.0	0.8724304715840387	0.93186955117856	0.9998943475964078	0.00010565240359217132	1.0	0.9928057553956835	0.996389891696751
69	1.0	0.0	1.0	1.0	1.0	0.8724304715840387	0.12756952841596125	1.0	0.8724304715840387	0.93186955117856	0.9998943475964078	0.00010565240359217132	1.0	0.9928057553956835	0.996389891696751
69	1.0	0.0	1.0	1.0	1.0	0.8724304715840387	0.12756952841596125	1.0	0.8724304715840387	0.93186955117856	0.9998943475964078	0.00010565240359217132	1.0	0.9928057553956835	0.996389891696751
69	1.0	0.0	1.0	1.0	1.0	0.8724304715840387	0.12756952841596125	1.0	0.8724304715840387	0.93186955117856	0.9998943475964078	0.00010565240359217132	1.0	0.9928057553956835	0.996389891696751
69	1.0	0.0	1.0	1.0	1.0	0.8724304715840387	0.12756952841596125	1.0	0.8724304715840387	0.93186955117856	0.9998943475964078	0.00010565240359217132	1.0	0.9928057553956835	0.996389891696751
69	1.0	0.0	1.0	1.0	1.0	0.8724304715840387	0.12756952841596125	1.0	0.8724304715840387	0.93186955117856	0.9998943475964078	0.00010565240359217132	1.0	0.9928057553956835	0.996389891696751
69	1.0	0.0	1.0	1.0	1.0	0.8724304715840387	0.12756952841596125	1.0	0.8724304715840387	0.93186955117856	0.9998943475964078	0.00010565240359217132	1.0	0.9928057553956835	0.996389891696751
69	1.0	0.0	1.0	1.0	1.0	0.8724304715840387	0.12756952841596125	1.0	0.8724304715840387	0.93186955117856	0.9998943475964078	0.00010565240359217132	1.0	0.9928057553956835	0.996389891696751
69	1.0	0.0	1.0	1.0	1.0	0.8724304715840387	0.12756952841596125	1.0	0.8724304715840387	0.93186955117856	0.9998943475964078	0.00010565240359217132	1.0	0.9928057553956835	0.996389891696751
69	1.0	0.0	1.0	1.0	1.0	0.8724304715840387	0.12756952841596125	1.0	0.8724304715840387	0.93186955117856	0.9998943475964078	0.00010565240359217132	1.0	0.9928057553956835	0.996389891696751
69	1.0	0.0	1.0	1.0	1.0	0.8724304715840387	0.12756952841596125	1.0	0.8724304715840387	0.93186955117856	0.9998943475964078	0.00010565240359217132	1.0	0.9928057553956835	0.996389891696751
69	1.0	0.0	1.0	1.0	1.0	0.8724304715840387	0.12756952841596125	1.0	0.8724304715840387	0.93186955117856	0.9998943475964078	0.00010565240359217132	1.0	0.9928057553956835	0.996389891696751
69	1.0	0.0	1.0	1.0	1.0	0.8724304715840387	0.12756952841596125	1.0	0.8724304715840387	0.93186955117856	0.9998943475964078	0.00010565240359217132	1.0	0.9928057553956835	0.996389891696751
69	1.0	0.0	1.0	1.0	1.0	0.8724304715840387	0.12756952841596125	1.0	0.8724304715840387	0.93186955117856	0.9998943475964078	0.00010565240359217132	1.0	0.9928057553956835	0.996389891696751
69	1.0	0.0	1.0	1.0	1.0	0.8724304715840387	0.12756952841596125	1.0	0.8724304715840387	0.93186955117856	0.9998943475964078	0.00010565240359217132	1.0	0.9928057553956835	0.996389891696751
69	1.0	0.0	1.0	1.0	1.0	0.8724304715840387	0.12756952841596125	1.0	0.8724304715840387	0.93186955117856	0.9998943475964078	0.00010565240359217132	1.0	0.9928057553956835	0.996389891696751
69	1.0	0.0	1.0	1.0	1.0	0.8724304715840387	0.12756952841596125	1.0	0.8724304715840387	0.93186955117856	0.9998943475964078	0.00010565240359217132	1.0	0.9928057553956835	0.996389891696751
69	1.0	0.0	1.0	1.0	1.0	0.8724304715840387	0.12756952841596125	1.0	0.8724304715840387	0.93186955117856	0.9998943475964078	0.00010565240359217132	1.0	0.9928057553956835	0.996389891696751
69	1.0	0.0	1.0	1.0	1.0	0.8724304715840387	0.12756952841596125	1.0	0.8724304715840387	0.93186955117856	0.9998943475964078	0.00010565240359217132	1.0	0.9928057553956835	0.996389891696751
69	1.0	0.0	1.0	1.0	1.0	0.8724304715840387	0.12756952841596125	1.0	0.8724304715840387	0.93186955117856	0.9998943475964078	0.00010565240359217132	1.0	0.9928057553956835	0.996389891696751
69	1.0	0.0	1.0	1.0	1.0	0.8724304715840387	0.12756952841596125	1.0	0.8724304715840387	0.93186955117856	0.9998943475964078	0.00010565240359217132	1.0	0.9928057553956835	0.996389891696751
69	1.0	0.0	1.0	1.0	1.0	0.8724304715840387	0.12756952841596125	1.0	0.8724304715840387	0.93186955117856	0.9998943475964078	0.00010565240359217132	1.0	0.9928057553956835	0.996389891696751
69	1.0	0.0	1.0	1.0	1.0	0.8724304715840387	0.12756952841596125	1.0	0.8724304715840387	0.93186955117856	0.9998943475964078	0.00010565240359217132	1.0	0.9928057553956835	0.996389891696751
69	1.0	0.0	1.0	1.0	1.0	0.8724304715840387	0.12756952841596125	1.0	0.8724304715840387	0.93186955117856	0.9998943475964078	0.00010565240359217132	1.0	0.9928057553956835	0.996389891696751
69	1.0	0.0	1.0	1.0	1.0	0.8724304715840387	0.12756952841596125	1.0	0.8724304715840387	0.93186955117856	0.9998943475964078	0.00010565240359217132	1.0	0.9928057553956835	0.996389891696751
69	1.0	0.0	1.0	1.0	1.0	0.8724304715840387	0.12756952841596125	1.0	0.8724304715840387	0.93186955117856	0.9998943475964078	0.00010565240359217132	1.0	0.9928057553956835	0.996389891696751
69	1.0	0.0	1.0	1.0	1.0	0.8724304715840387	0.12756952841596125	1.0	0.8724304715840387	0.93186955117856	0.9998943475964078	0.00010565240359217132	1.0	0.9928057553956835	0.996389891696751
69	1.0	0.0	1.0	1.0	1.0	0.8724304715840387	0.12756952841596125	1.0	0.8724304715840387	0.93186955117856	0.9998943475964078	0.00010565240359217132	1.0	0.9928057553956835	0.996389891696751
69	1.0	0.0	1.0	1.0	1.0	0.8724304715840387	0.12756952841596125	1.0	0.8724304715840387	0.93186955117856	0.9998943475964078	0.00010565240359217132	1.0	0.9928057553956835	0.996389891696751
69	1.0	0.0	1.0	1.0	1.0	0.8724304715840387	0.12756952841596125	1.0	0.8724304715840387	0.93186955117856	0.9998943475964078	0.00010565240359217132	1.0	0.9928057553956835	0.996389891696751
69	1.0	0.0	1.0	1.0	1.0	0.8724304715840387	0.12756952841596125	1.0	0.8724304715840387	0.93186955117856	0.9998943475964078	0.00010565240359217132	1.0	0.9928057553956835	0.996389891696751
69	1.0	0.0	1.0	1.0	1.0	0.8724304715840387	0.12756952841596125	1.0	0.8724304715840387	0.93186955117856	0.9998943475964078	0.00010565240359217132	1.0	0.9928057553956835	0.996389891696751
69	1.0	0.0	1.0	1.0	1.0	0.8724304715840387	0.12756952841596125	1.0	0.8724304715840387	0.93186955117856	0.9998943475964078	0.00010565240359217132	1.0	0.9928057553956835	0.996389891696751
69	1.0	0.0	1.0	1.0	1.0	0.8724304715840387	0.12756952841596125	1.0	0.8724304715840387	0.93186955117856	0.9998943475964078	0.00010565240359217132	1.0	0.9928057553956835	0.996389891696751
69	1.0	0.0	1.0	1.0	1.0	0.8724304715840387	0.12756952841596125	1.0	0.8724304715840387	0.93186955117856	0.9998943475964078	0.00010565240359217132	1.0	0.9928057553956835	0.996389891696751
69	1.0	0.0	1.0	1.0	1.0	0.8724304715840387	0.12756952841596125	1.0	0.8724304715840387	0.93186955117856	0.9998943475964078	0.00010565240359217132	1.0	0.9928057553956835	0.996389891696751
69	1.0	0.0	1.0	1.0	1.0	0.8724304715840387	0.12756952841596125	1.0	0.8724304715840387	0.93186955117856	0.9998943475964078	0.00010565240359217132	1.0	0.9928057553956835	0.996389891696751
69	1.0	0.0	1.0	1.0	1.0	0.8724304715840387	0.12756952841596125	1.0	0.8724304715840387	0.93186955117856	0.9998943475964078	0.00010565240359217132	1.0	0.9928057553956835	0.996389891696751
69	1.0	0.0	1.0	1.0	1.0	0.8724304715840387	0.12756952841596125	1.0	0.8724304715840387	0.93186955117856	0.9998943475964078	0.00010565240359217132	1.0	0.9928057553956835	0.996389891696751
102	1.0	0.0	1.0	1.0	1.0	0.8765432098765432	0.12345679012345678	1.0	0.8765432098765432	0.9342105263157895	0.9997912317327766	0.00020876826722338038	0.9960629921259843	0.9960629921259843	0.9960629921259843
102	1.0	0.0	1.0	1.0	1.0	0.8765432098765432	0.12345679012345678	1.0	0.8765432098765432	0.9342105263157895	0.9997912317327766	0.00020876826722338038	0.9960629921259843	0.9960629921259843	0.9960629921259843
102	1.0	0.0	1.0	1.0	1.0	0.8765432098765432	0.12345679012345678	1.0	0.8765432098765432	0.9342105263157895	0.9997912317327766	0.00020876826722338038	0.9960629921259843	0.9960629921259843	0.9960629921259843
102	1.0	0.0	1.0	1.0	1.0	0.8765432098765432	0.12345679012345678	1.0	0.8765432098765432	0.9342105263157895	0.9997912317327766	0.00020876826722338038	0.9960629921259843	0.9960629921259843	0.9960629921259843
102	1.0	0.0	1.0	1.0	1.0	0.8765432098765432	0.12345679012345678	1.0	0.8765432098765432	0.9342105263157895	0.9997912317327766	0.00020876826722338038	0.9960629921259843	0.9960629921259843	0.9960629921259843
