# Supplementary material for: An Improved Hybrid Feature Selection Algorithm for Electric Charge Recovery Risk
Source: Hindawi journal article supplement (doi:10.1155/2020/8479341), 2020-08-28
Supplement: f1 [file 8479341.f1.zip › 8479341.f1/Experimental Results/201808/NBPSOSEE_SBS_results.csv]

features_num	Accuracy_high	Loss_high	Precission_high	Recall_high	F1_high	Accuracy_med	Loss_med	Precission_med	Recall_med	F1_med	Accuracy_low	Loss_low	Precission_low	Recall_low	F1_low
102	1	0	1	1	1	0.877272727	0.122727273	1	0.877272727	0.934624697	0.99979121	0.00020879	0.996047431	0.996047431	0.996047431
101	1	0	1	1	1	0.877842755	0.122157245	1	0.877842755	0.934948097	0.999791232	0.000208768	0.996062992	0.996062992	0.996062992
101	1	0	1	1	1	0.877842755	0.122157245	1	0.877842755	0.934948097	0.999791232	0.000208768	0.996062992	0.996062992	0.996062992
101	1	0	1	1	1	0.877842755	0.122157245	1	0.877842755	0.934948097	0.999791232	0.000208768	0.996062992	0.996062992	0.996062992
101	1	0	1	1	1	0.877842755	0.122157245	1	0.877842755	0.934948097	0.999791232	0.000208768	0.996062992	0.996062992	0.996062992
100	1	0	1	1	1	0.877842755	0.122157245	1	0.877842755	0.934948097	0.999791232	0.000208768	0.996062992	0.996062992	0.996062992
100	1	0	1	1	1	0.877842755	0.122157245	1	0.877842755	0.934948097	0.999791232	0.000208768	0.996062992	0.996062992	0.996062992
100	1	0	1	1	1	0.877842755	0.122157245	1	0.877842755	0.934948097	0.999791232	0.000208768	0.996062992	0.996062992	0.996062992
99	1	0	1	1	1	0.877842755	0.122157245	1	0.877842755	0.934948097	0.999791232	0.000208768	0.996062992	0.996062992	0.996062992
99	1	0	1	1	1	0.877842755	0.122157245	1	0.877842755	0.934948097	0.999791232	0.000208768	0.996062992	0.996062992	0.996062992
99	1	0	1	1	1	0.877842755	0.122157245	1	0.877842755	0.934948097	0.999791232	0.000208768	0.996062992	0.996062992	0.996062992
98	1	0	1	1	1	0.877842755	0.122157245	1	0.877842755	0.934948097	0.999791232	0.000208768	0.996062992	0.996062992	0.996062992
98	1	0	1	1	1	0.877842755	0.122157245	1	0.877842755	0.934948097	0.999791232	0.000208768	0.996062992	0.996062992	0.996062992
97	1	0	1	1	1	0.877842755	0.122157245	1	0.877842755	0.934948097	0.999791232	0.000208768	0.996062992	0.996062992	0.996062992
97	1	0	1	1	1	0.877842755	0.122157245	1	0.877842755	0.934948097	0.999791232	0.000208768	0.996062992	0.996062992	0.996062992
97	1	0	1	1	1	0.877842755	0.122157245	1	0.877842755	0.934948097	0.999791232	0.000208768	0.996062992	0.996062992	0.996062992
97	1	0	1	1	1	0.877842755	0.122157245	1	0.877842755	0.934948097	0.999791232	0.000208768	0.996062992	0.996062992	0.996062992
97	1	0	1	1	1	0.877842755	0.122157245	1	0.877842755	0.934948097	0.999791232	0.000208768	0.996062992	0.996062992	0.996062992
97	1	0	1	1	1	0.877842755	0.122157245	1	0.877842755	0.934948097	0.999791232	0.000208768	0.996062992	0.996062992	0.996062992
97	1	0	1	1	1	0.877842755	0.122157245	1	0.877842755	0.934948097	0.999791232	0.000208768	0.996062992	0.996062992	0.996062992
97	1	0	1	1	1	0.877842755	0.122157245	1	0.877842755	0.934948097	0.999791232	0.000208768	0.996062992	0.996062992	0.996062992
97	1	0	1	1	1	0.877842755	0.122157245	1	0.877842755	0.934948097	0.999791232	0.000208768	0.996062992	0.996062992	0.996062992
97	1	0	1	1	1	0.877842755	0.122157245	1	0.877842755	0.934948097	0.999791232	0.000208768	0.996062992	0.996062992	0.996062992
96	1	0	1	1	1	0.877842755	0.122157245	1	0.877842755	0.934948097	0.999791232	0.000208768	0.996062992	0.996062992	0.996062992
96	1	0	1	1	1	0.877842755	0.122157245	1	0.877842755	0.934948097	0.999791232	0.000208768	0.996062992	0.996062992	0.996062992
96	1	0	1	1	1	0.877842755	0.122157245	1	0.877842755	0.934948097	0.999791232	0.000208768	0.996062992	0.996062992	0.996062992
96	1	0	1	1	1	0.877842755	0.122157245	1	0.877842755	0.934948097	0.999791232	0.000208768	0.996062992	0.996062992	0.996062992
96	1	0	1	1	1	0.877842755	0.122157245	1	0.877842755	0.934948097	0.999791232	0.000208768	0.996062992	0.996062992	0.996062992
96	1	0	1	1	1	0.877842755	0.122157245	1	0.877842755	0.934948097	0.999791232	0.000208768	0.996062992	0.996062992	0.996062992
95	1	0	1	1	1	0.877842755	0.122157245	1	0.877842755	0.934948097	0.999791232	0.000208768	0.996062992	0.996062992	0.996062992
94	1	0	1	1	1	0.877842755	0.122157245	1	0.877842755	0.934948097	0.999791232	0.000208768	0.996062992	0.996062992	0.996062992
93	1	0	1	1	1	0.877842755	0.122157245	1	0.877842755	0.934948097	0.999791232	0.000208768	0.996062992	0.996062992	0.996062992
93	1	0	1	1	1	0.877842755	0.122157245	1	0.877842755	0.934948097	0.999791232	0.000208768	0.996062992	0.996062992	0.996062992
93	1	0	1	1	1	0.877842755	0.122157245	1	0.877842755	0.934948097	0.999791232	0.000208768	0.996062992	0.996062992	0.996062992
93	1	0	1	1	1	0.877842755	0.122157245	1	0.877842755	0.934948097	0.999791232	0.000208768	0.996062992	0.996062992	0.996062992
92	1	0	1	1	1	0.877842755	0.122157245	1	0.877842755	0.934948097	0.999791232	0.000208768	0.996062992	0.996062992	0.996062992
92	1	0	1	1	1	0.877842755	0.122157245	1	0.877842755	0.934948097	0.999791232	0.000208768	0.996062992	0.996062992	0.996062992
92	1	0	1	1	1	0.877842755	0.122157245	1	0.877842755	0.934948097	0.999791232	0.000208768	0.996062992	0.996062992	0.996062992
92	1	0	1	1	1	0.877842755	0.122157245	1	0.877842755	0.934948097	0.999791232	0.000208768	0.996062992	0.996062992	0.996062992
92	1	0	1	1	1	0.877842755	0.122157245	1	0.877842755	0.934948097	0.999791232	0.000208768	0.996062992	0.996062992	0.996062992
91	1	0	1	1	1	0.877842755	0.122157245	1	0.877842755	0.934948097	0.999791232	0.000208768	0.996062992	0.996062992	0.996062992
91	1	0	1	1	1	0.877842755	0.122157245	1	0.877842755	0.934948097	0.999791232	0.000208768	0.996062992	0.996062992	0.996062992
91	1	0	1	1	1	0.877842755	0.122157245	1	0.877842755	0.934948097	0.999791232	0.000208768	0.996062992	0.996062992	0.996062992
91	1	0	1	1	1	0.877842755	0.122157245	1	0.877842755	0.934948097	0.999791232	0.000208768	0.996062992	0.996062992	0.996062992
91	1	0	1	1	1	0.877842755	0.122157245	1	0.877842755	0.934948097	0.999791232	0.000208768	0.996062992	0.996062992	0.996062992
91	1	0	1	1	1	0.877842755	0.122157245	1	0.877842755	0.934948097	0.999791232	0.000208768	0.996062992	0.996062992	0.996062992
90	1	0	1	1	1	0.877842755	0.122157245	1	0.877842755	0.934948097	0.999791232	0.000208768	0.996062992	0.996062992	0.996062992
90	1	0	1	1	1	0.877842755	0.122157245	1	0.877842755	0.934948097	0.999791232	0.000208768	0.996062992	0.996062992	0.996062992
90	1	0	1	1	1	0.877842755	0.122157245	1	0.877842755	0.934948097	0.999791232	0.000208768	0.996062992	0.996062992	0.996062992
90	1	0	1	1	1	0.877842755	0.122157245	1	0.877842755	0.934948097	0.999791232	0.000208768	0.996062992	0.996062992	0.996062992
89	1	0	1	1	1	0.877842755	0.122157245	1	0.877842755	0.934948097	0.999791232	0.000208768	0.996062992	0.996062992	0.996062992
88	1	0	1	1	1	0.877842755	0.122157245	1	0.877842755	0.934948097	0.999791232	0.000208768	0.996062992	0.996062992	0.996062992
87	1	0	1	1	1	0.877842755	0.122157245	1	0.877842755	0.934948097	0.999791232	0.000208768	0.996062992	0.996062992	0.996062992
86	1	0	1	1	1	0.877842755	0.122157245	1	0.877842755	0.934948097	0.999791232	0.000208768	0.996062992	0.996062992	0.996062992
85	1	0	1	1	1	0.87987013	0.12012987	1	0.87987013	0.936096718	0.99979121	0.00020879	0.996047431	0.996047431	0.996047431
85	1	0	1	1	1	0.87987013	0.12012987	1	0.87987013	0.936096718	0.99979121	0.00020879	0.996047431	0.996047431	0.996047431
85	1	0	1	1	1	0.87987013	0.12012987	1	0.87987013	0.936096718	0.99979121	0.00020879	0.996047431	0.996047431	0.996047431
85	1	0	1	1	1	0.87987013	0.12012987	1	0.87987013	0.936096718	0.99979121	0.00020879	0.996047431	0.996047431	0.996047431
85	1	0	1	1	1	0.87987013	0.12012987	1	0.87987013	0.936096718	0.99979121	0.00020879	0.996047431	0.996047431	0.996047431
85	1	0	1	1	1	0.87987013	0.12012987	1	0.87987013	0.936096718	0.99979121	0.00020879	0.996047431	0.996047431	0.996047431
85	1	0	1	1	1	0.87987013	0.12012987	1	0.87987013	0.936096718	0.99979121	0.00020879	0.996047431	0.996047431	0.996047431
85	1	0	1	1	1	0.87987013	0.12012987	1	0.87987013	0.936096718	0.99979121	0.00020879	0.996047431	0.996047431	0.996047431
85	1	0	1	1	1	0.87987013	0.12012987	1	0.87987013	0.936096718	0.99979121	0.00020879	0.996047431	0.996047431	0.996047431
85	1	0	1	1	1	0.87987013	0.12012987	1	0.87987013	0.936096718	0.99979121	0.00020879	0.996047431	0.996047431	0.996047431
85	1	0	1	1	1	0.87987013	0.12012987	1	0.87987013	0.936096718	0.99979121	0.00020879	0.996047431	0.996047431	0.996047431
85	1	0	1	1	1	0.87987013	0.12012987	1	0.87987013	0.936096718	0.99979121	0.00020879	0.996047431	0.996047431	0.996047431
85	1	0	1	1	1	0.87987013	0.12012987	1	0.87987013	0.936096718	0.99979121	0.00020879	0.996047431	0.996047431	0.996047431
85	1	0	1	1	1	0.87987013	0.12012987	1	0.87987013	0.936096718	0.99979121	0.00020879	0.996047431	0.996047431	0.996047431
85	1	0	1	1	1	0.87987013	0.12012987	1	0.87987013	0.936096718	0.99979121	0.00020879	0.996047431	0.996047431	0.996047431
85	1	0	1	1	1	0.87987013	0.12012987	1	0.87987013	0.936096718	0.99979121	0.00020879	0.996047431	0.996047431	0.996047431
85	1	0	1	1	1	0.87987013	0.12012987	1	0.87987013	0.936096718	0.99979121	0.00020879	0.996047431	0.996047431	0.996047431
85	1	0	1	1	1	0.87987013	0.12012987	1	0.87987013	0.936096718	0.99979121	0.00020879	0.996047431	0.996047431	0.996047431
85	1	0	1	1	1	0.87987013	0.12012987	1	0.87987013	0.936096718	0.99979121	0.00020879	0.996047431	0.996047431	0.996047431
85	1	0	1	1	1	0.87987013	0.12012987	1	0.87987013	0.936096718	0.99979121	0.00020879	0.996047431	0.996047431	0.996047431
85	1	0	1	1	1	0.87987013	0.12012987	1	0.87987013	0.936096718	0.99979121	0.00020879	0.996047431	0.996047431	0.996047431
85	1	0	1	1	1	0.87987013	0.12012987	1	0.87987013	0.936096718	0.99979121	0.00020879	0.996047431	0.996047431	0.996047431
85	1	0	1	1	1	0.87987013	0.12012987	1	0.87987013	0.936096718	0.99979121	0.00020879	0.996047431	0.996047431	0.996047431
85	1	0	1	1	1	0.87987013	0.12012987	1	0.87987013	0.936096718	0.99979121	0.00020879	0.996047431	0.996047431	0.996047431
85	1	0	1	1	1	0.87987013	0.12012987	1	0.87987013	0.936096718	0.99979121	0.00020879	0.996047431	0.996047431	0.996047431
85	1	0	1	1	1	0.87987013	0.12012987	1	0.87987013	0.936096718	0.99979121	0.00020879	0.996047431	0.996047431	0.996047431
85	1	0	1	1	1	0.87987013	0.12012987	1	0.87987013	0.936096718	0.99979121	0.00020879	0.996047431	0.996047431	0.996047431
85	1	0	1	1	1	0.87987013	0.12012987	1	0.87987013	0.936096718	0.99979121	0.00020879	0.996047431	0.996047431	0.996047431
85	1	0	1	1	1	0.87987013	0.12012987	1	0.87987013	0.936096718	0.99979121	0.00020879	0.996047431	0.996047431	0.996047431
85	1	0	1	1	1	0.87987013	0.12012987	1	0.87987013	0.936096718	0.99979121	0.00020879	0.996047431	0.996047431	0.996047431
85	1	0	1	1	1	0.87987013	0.12012987	1	0.87987013	0.936096718	0.99979121	0.00020879	0.996047431	0.996047431	0.996047431
85	1	0	1	1	1	0.87987013	0.12012987	1	0.87987013	0.936096718	0.99979121	0.00020879	0.996047431	0.996047431	0.996047431
85	1	0	1	1	1	0.87987013	0.12012987	1	0.87987013	0.936096718	0.99979121	0.00020879	0.996047431	0.996047431	0.996047431
84	1	0	1	1	1	0.911054638	0.088945362	1	0.911054638	0.953457447	0.999790466	0.000209534	0.99543379	0.99543379	0.99543379
84	1	0	1	1	1	0.911054638	0.088945362	1	0.911054638	0.953457447	0.999790466	0.000209534	0.99543379	0.99543379	0.99543379
83	1	0	1	1	1	0.92345679	0.07654321	0.999331997	0.924027177	0.960205392	0.999894726	0.000105274	1	0.994252874	0.997118156
82	1	0	1	1	1	0.92645241	0.07354759	0.999333333	0.927025356	0.961822265	0.999894748	0.000105252	1	0.994318182	0.997150997
81	1	0	1	1	1	0.92645241	0.07354759	0.999333333	0.927025356	0.961822265	0.999894748	0.000105252	1	0.994318182	0.997150997
80	1	0	1	1	1	0.92645241	0.07354759	0.999333333	0.927025356	0.961822265	0.999894748	0.000105252	1	0.994318182	0.997150997
80	1	0	1	1	1	0.92645241	0.07354759	0.999333333	0.927025356	0.961822265	0.999894748	0.000105252	1	0.994318182	0.997150997
79	1	0	1	1	1	0.92645241	0.07354759	0.999333333	0.927025356	0.961822265	0.999894748	0.000105252	1	0.994318182	0.997150997
78	1	0	1	1	1	0.92645241	0.07354759	0.999333333	0.927025356	0.961822265	0.999894748	0.000105252	1	0.994318182	0.997150997
78	1	0	1	1	1	0.92645241	0.07354759	0.999333333	0.927025356	0.961822265	0.999894748	0.000105252	1	0.994318182	0.997150997
77	1	0	1	1	1	0.92645241	0.07354759	0.999333333	0.927025356	0.961822265	0.999894748	0.000105252	1	0.994318182	0.997150997
76	1	0	1	1	1	0.92645241	0.07354759	0.999333333	0.927025356	0.961822265	0.999894748	0.000105252	1	0.994318182	0.997150997
75	1	0	1	1	1	0.92645241	0.07354759	0.999333333	0.927025356	0.961822265	0.999894748	0.000105252	1	0.994318182	0.997150997
74	1	0	1	1	1	0.92645241	0.07354759	0.999333333	0.927025356	0.961822265	0.999894748	0.000105252	1	0.994318182	0.997150997
73	1	0	1	1	1	0.92645241	0.07354759	0.999333333	0.927025356	0.961822265	0.999894748	0.000105252	1	0.994318182	0.997150997
72	1	0	1	1	1	0.92645241	0.07354759	0.999333333	0.927025356	0.961822265	0.999894748	0.000105252	1	0.994318182	0.997150997
72	1	0	1	1	1	0.92645241	0.07354759	0.999333333	0.927025356	0.961822265	0.999894748	0.000105252	1	0.994318182	0.997150997
72	1	0	1	1	1	0.92645241	0.07354759	0.999333333	0.927025356	0.961822265	0.999894748	0.000105252	1	0.994318182	0.997150997
72	1	0	1	1	1	0.92645241	0.07354759	0.999333333	0.927025356	0.961822265	0.999894748	0.000105252	1	0.994318182	0.997150997
72	1	0	1	1	1	0.92645241	0.07354759	0.999333333	0.927025356	0.961822265	0.999894748	0.000105252	1	0.994318182	0.997150997
72	1	0	1	1	1	0.92645241	0.07354759	0.999333333	0.927025356	0.961822265	0.999894748	0.000105252	1	0.994318182	0.997150997
72	1	0	1	1	1	0.92645241	0.07354759	0.999333333	0.927025356	0.961822265	0.999894748	0.000105252	1	0.994318182	0.997150997
72	1	0	1	1	1	0.92645241	0.07354759	0.999333333	0.927025356	0.961822265	0.999894748	0.000105252	1	0.994318182	0.997150997
72	1	0	1	1	1	0.92645241	0.07354759	0.999333333	0.927025356	0.961822265	0.999894748	0.000105252	1	0.994318182	0.997150997
72	1	0	1	1	1	0.92645241	0.07354759	0.999333333	0.927025356	0.961822265	0.999894748	0.000105252	1	0.994318182	0.997150997
72	1	0	1	1	1	0.92645241	0.07354759	0.999333333	0.927025356	0.961822265	0.999894748	0.000105252	1	0.994318182	0.997150997
72	1	0	1	1	1	0.92645241	0.07354759	0.999333333	0.927025356	0.961822265	0.999894748	0.000105252	1	0.994318182	0.997150997
72	1	0	1	1	1	0.92645241	0.07354759	0.999333333	0.927025356	0.961822265	0.999894748	0.000105252	1	0.994318182	0.997150997
72	1	0	1	1	1	0.92645241	0.07354759	0.999333333	0.927025356	0.961822265	0.999894748	0.000105252	1	0.994318182	0.997150997
72	1	0	1	1	1	0.92645241	0.07354759	0.999333333	0.927025356	0.961822265	0.999894748	0.000105252	1	0.994318182	0.997150997
72	1	0	1	1	1	0.92645241	0.07354759	0.999333333	0.927025356	0.961822265	0.999894748	0.000105252	1	0.994318182	0.997150997
72	1	0	1	1	1	0.92645241	0.07354759	0.999333333	0.927025356	0.961822265	0.999894748	0.000105252	1	0.994318182	0.997150997
72	1	0	1	1	1	0.92645241	0.07354759	0.999333333	0.927025356	0.961822265	0.999894748	0.000105252	1	0.994318182	0.997150997
72	1	0	1	1	1	0.92645241	0.07354759	0.999333333	0.927025356	0.961822265	0.999894748	0.000105252	1	0.994318182	0.997150997
72	1	0	1	1	1	0.92645241	0.07354759	0.999333333	0.927025356	0.961822265	0.999894748	0.000105252	1	0.994318182	0.997150997
72	1	0	1	1	1	0.92645241	0.07354759	0.999333333	0.927025356	0.961822265	0.999894748	0.000105252	1	0.994318182	0.997150997
72	1	0	1	1	1	0.92645241	0.07354759	0.999333333	0.927025356	0.961822265	0.999894748	0.000105252	1	0.994318182	0.997150997
72	1	0	1	1	1	0.92645241	0.07354759	0.999333333	0.927025356	0.961822265	0.999894748	0.000105252	1	0.994318182	0.997150997
72	1	0	1	1	1	0.92645241	0.07354759	0.999333333	0.927025356	0.961822265	0.999894748	0.000105252	1	0.994318182	0.997150997
72	1	0	1	1	1	0.92645241	0.07354759	0.999333333	0.927025356	0.961822265	0.999894748	0.000105252	1	0.994318182	0.997150997
72	1	0	1	1	1	0.92645241	0.07354759	0.999333333	0.927025356	0.961822265	0.999894748	0.000105252	1	0.994318182	0.997150997
72	1	0	1	1	1	0.92645241	0.07354759	0.999333333	0.927025356	0.961822265	0.999894748	0.000105252	1	0.994318182	0.997150997
72	1	0	1	1	1	0.92645241	0.07354759	0.999333333	0.927025356	0.961822265	0.999894748	0.000105252	1	0.994318182	0.997150997
72	1	0	1	1	1	0.92645241	0.07354759	0.999333333	0.927025356	0.961822265	0.999894748	0.000105252	1	0.994318182	0.997150997
72	1	0	1	1	1	0.92645241	0.07354759	0.999333333	0.927025356	0.961822265	0.999894748	0.000105252	1	0.994318182	0.997150997
72	1	0	1	1	1	0.92645241	0.07354759	0.999333333	0.927025356	0.961822265	0.999894748	0.000105252	1	0.994318182	0.997150997
72	1	0	1	1	1	0.92645241	0.07354759	0.999333333	0.927025356	0.961822265	0.999894748	0.000105252	1	0.994318182	0.997150997
72	1	0	1	1	1	0.92645241	0.07354759	0.999333333	0.927025356	0.961822265	0.999894748	0.000105252	1	0.994318182	0.997150997
72	1	0	1	1	1	0.92645241	0.07354759	0.999333333	0.927025356	0.961822265	0.999894748	0.000105252	1	0.994318182	0.997150997
72	1	0	1	1	1	0.92645241	0.07354759	0.999333333	0.927025356	0.961822265	0.999894748	0.000105252	1	0.994318182	0.997150997
72	1	0	1	1	1	0.92645241	0.07354759	0.999333333	0.927025356	0.961822265	0.999894748	0.000105252	1	0.994318182	0.997150997
72	1	0	1	1	1	0.92645241	0.07354759	0.999333333	0.927025356	0.961822265	0.999894748	0.000105252	1	0.994318182	0.997150997
72	1	0	1	1	1	0.92645241	0.07354759	0.999333333	0.927025356	0.961822265	0.999894748	0.000105252	1	0.994318182	0.997150997
72	1	0	1	1	1	0.92645241	0.07354759	0.999333333	0.927025356	0.961822265	0.999894748	0.000105252	1	0.994318182	0.997150997
72	1	0	1	1	1	0.92645241	0.07354759	0.999333333	0.927025356	0.961822265	0.999894748	0.000105252	1	0.994318182	0.997150997
72	1	0	1	1	1	0.92645241	0.07354759	0.999333333	0.927025356	0.961822265	0.999894748	0.000105252	1	0.994318182	0.997150997
72	1	0	1	1	1	0.92645241	0.07354759	0.999333333	0.927025356	0.961822265	0.999894748	0.000105252	1	0.994318182	0.997150997
72	1	0	1	1	1	0.92645241	0.07354759	0.999333333	0.927025356	0.961822265	0.999894748	0.000105252	1	0.994318182	0.997150997
72	1	0	1	1	1	0.92645241	0.07354759	0.999333333	0.927025356	0.961822265	0.999894748	0.000105252	1	0.994318182	0.997150997
72	1	0	1	1	1	0.92645241	0.07354759	0.999333333	0.927025356	0.961822265	0.999894748	0.000105252	1	0.994318182	0.997150997
72	1	0	1	1	1	0.92645241	0.07354759	0.999333333	0.927025356	0.961822265	0.999894748	0.000105252	1	0.994318182	0.997150997
72	1	0	1	1	1	0.92645241	0.07354759	0.999333333	0.927025356	0.961822265	0.999894748	0.000105252	1	0.994318182	0.997150997
72	1	0	1	1	1	0.92645241	0.07354759	0.999333333	0.927025356	0.961822265	0.999894748	0.000105252	1	0.994318182	0.997150997
72	1	0	1	1	1	0.92645241	0.07354759	0.999333333	0.927025356	0.961822265	0.999894748	0.000105252	1	0.994318182	0.997150997
72	1	0	1	1	1	0.92645241	0.07354759	0.999333333	0.927025356	0.961822265	0.999894748	0.000105252	1	0.994318182	0.997150997
72	1	0	1	1	1	0.92645241	0.07354759	0.999333333	0.927025356	0.961822265	0.999894748	0.000105252	1	0.994318182	0.997150997
72	1	0	1	1	1	0.92645241	0.07354759	0.999333333	0.927025356	0.961822265	0.999894748	0.000105252	1	0.994318182	0.997150997
72	1	0	1	1	1	0.92645241	0.07354759	0.999333333	0.927025356	0.961822265	0.999894748	0.000105252	1	0.994318182	0.997150997
72	1	0	1	1	1	0.92645241	0.07354759	0.999333333	0.927025356	0.961822265	0.999894748	0.000105252	1	0.994318182	0.997150997
72	1	0	1	1	1	0.92645241	0.07354759	0.999333333	0.927025356	0.961822265	0.999894748	0.000105252	1	0.994318182	0.997150997
72	1	0	1	1	1	0.92645241	0.07354759	0.999333333	0.927025356	0.961822265	0.999894748	0.000105252	1	0.994318182	0.997150997
72	1	0	1	1	1	0.92645241	0.07354759	0.999333333	0.927025356	0.961822265	0.999894748	0.000105252	1	0.994318182	0.997150997
72	1	0	1	1	1	0.92645241	0.07354759	0.999333333	0.927025356	0.961822265	0.999894748	0.000105252	1	0.994318182	0.997150997
72	1	0	1	1	1	0.92645241	0.07354759	0.999333333	0.927025356	0.961822265	0.999894748	0.000105252	1	0.994318182	0.997150997
72	1	0	1	1	1	0.92645241	0.07354759	0.999333333	0.927025356	0.961822265	0.999894748	0.000105252	1	0.994318182	0.997150997
72	1	0	1	1	1	0.92645241	0.07354759	0.999333333	0.927025356	0.961822265	0.999894748	0.000105252	1	0.994318182	0.997150997
72	1	0	1	1	1	0.92645241	0.07354759	0.999333333	0.927025356	0.961822265	0.999894748	0.000105252	1	0.994318182	0.997150997
72	1	0	1	1	1	0.92645241	0.07354759	0.999333333	0.927025356	0.961822265	0.999894748	0.000105252	1	0.994318182	0.997150997
72	1	0	1	1	1	0.92645241	0.07354759	0.999333333	0.927025356	0.961822265	0.999894748	0.000105252	1	0.994318182	0.997150997
72	1	0	1	1	1	0.92645241	0.07354759	0.999333333	0.927025356	0.961822265	0.999894748	0.000105252	1	0.994318182	0.997150997
72	1	0	1	1	1	0.92645241	0.07354759	0.999333333	0.927025356	0.961822265	0.999894748	0.000105252	1	0.994318182	0.997150997
72	1	0	1	1	1	0.92645241	0.07354759	0.999333333	0.927025356	0.961822265	0.999894748	0.000105252	1	0.994318182	0.997150997
72	1	0	1	1	1	0.92645241	0.07354759	0.999333333	0.927025356	0.961822265	0.999894748	0.000105252	1	0.994318182	0.997150997
72	1	0	1	1	1	0.92645241	0.07354759	0.999333333	0.927025356	0.961822265	0.999894748	0.000105252	1	0.994318182	0.997150997
72	1	0	1	1	1	0.92645241	0.07354759	0.999333333	0.927025356	0.961822265	0.999894748	0.000105252	1	0.994318182	0.997150997
72	1	0	1	1	1	0.92645241	0.07354759	0.999333333	0.927025356	0.961822265	0.999894748	0.000105252	1	0.994318182	0.997150997
72	1	0	1	1	1	0.92645241	0.07354759	0.999333333	0.927025356	0.961822265	0.999894748	0.000105252	1	0.994318182	0.997150997
72	1	0	1	1	1	0.92645241	0.07354759	0.999333333	0.927025356	0.961822265	0.999894748	0.000105252	1	0.994318182	0.997150997
72	1	0	1	1	1	0.92645241	0.07354759	0.999333333	0.927025356	0.961822265	0.999894748	0.000105252	1	0.994318182	0.997150997
72	1	0	1	1	1	0.92645241	0.07354759	0.999333333	0.927025356	0.961822265	0.999894748	0.000105252	1	0.994318182	0.997150997
72	1	0	1	1	1	0.92645241	0.07354759	0.999333333	0.927025356	0.961822265	0.999894748	0.000105252	1	0.994318182	0.997150997
72	1	0	1	1	1	0.92645241	0.07354759	0.999333333	0.927025356	0.961822265	0.999894748	0.000105252	1	0.994318182	0.997150997
72	1	0	1	1	1	0.92645241	0.07354759	0.999333333	0.927025356	0.961822265	0.999894748	0.000105252	1	0.994318182	0.997150997
72	1	0	1	1	1	0.92645241	0.07354759	0.999333333	0.927025356	0.961822265	0.999894748	0.000105252	1	0.994318182	0.997150997
72	1	0	1	1	1	0.92645241	0.07354759	0.999333333	0.927025356	0.961822265	0.999894748	0.000105252	1	0.994318182	0.997150997
72	1	0	1	1	1	0.92645241	0.07354759	0.999333333	0.927025356	0.961822265	0.999894748	0.000105252	1	0.994318182	0.997150997
72	1	0	1	1	1	0.92645241	0.07354759	0.999333333	0.927025356	0.961822265	0.999894748	0.000105252	1	0.994318182	0.997150997
72	1	0	1	1	1	0.92645241	0.07354759	0.999333333	0.927025356	0.961822265	0.999894748	0.000105252	1	0.994318182	0.997150997
72	1	0	1	1	1	0.92645241	0.07354759	0.999333333	0.927025356	0.961822265	0.999894748	0.000105252	1	0.994318182	0.997150997
72	1	0	1	1	1	0.92645241	0.07354759	0.999333333	0.927025356	0.961822265	0.999894748	0.000105252	1	0.994318182	0.997150997
72	1	0	1	1	1	0.92645241	0.07354759	0.999333333	0.927025356	0.961822265	0.999894748	0.000105252	1	0.994318182	0.997150997
72	1	0	1	1	1	0.92645241	0.07354759	0.999333333	0.927025356	0.961822265	0.999894748	0.000105252	1	0.994318182	0.997150997
72	1	0	1	1	1	0.92645241	0.07354759	0.999333333	0.927025356	0.961822265	0.999894748	0.000105252	1	0.994318182	0.997150997
72	1	0	1	1	1	0.92645241	0.07354759	0.999333333	0.927025356	0.961822265	0.999894748	0.000105252	1	0.994318182	0.997150997
72	1	0	1	1	1	0.92645241	0.07354759	0.999333333	0.927025356	0.961822265	0.999894748	0.000105252	1	0.994318182	0.997150997
72	1	0	1	1	1	0.92645241	0.07354759	0.999333333	0.927025356	0.961822265	0.999894748	0.000105252	1	0.994318182	0.997150997
72	1	0	1	1	1	0.92645241	0.07354759	0.999333333	0.927025356	0.961822265	0.999894748	0.000105252	1	0.994318182	0.997150997
72	1	0	1	1	1	0.92645241	0.07354759	0.999333333	0.927025356	0.961822265	0.999894748	0.000105252	1	0.994318182	0.997150997
72	1	0	1	1	1	0.92645241	0.07354759	0.999333333	0.927025356	0.961822265	0.999894748	0.000105252	1	0.994318182	0.997150997
72	1	0	1	1	1	0.92645241	0.07354759	0.999333333	0.927025356	0.961822265	0.999894748	0.000105252	1	0.994318182	0.997150997
72	1	0	1	1	1	0.92645241	0.07354759	0.999333333	0.927025356	0.961822265	0.999894748	0.000105252	1	0.994318182	0.997150997
72	1	0	1	1	1	0.92645241	0.07354759	0.999333333	0.927025356	0.961822265	0.999894748	0.000105252	1	0.994318182	0.997150997
72	1	0	1	1	1	0.92645241	0.07354759	0.999333333	0.927025356	0.961822265	0.999894748	0.000105252	1	0.994318182	0.997150997
72	1	0	1	1	1	0.92645241	0.07354759	0.999333333	0.927025356	0.961822265	0.999894748	0.000105252	1	0.994318182	0.997150997
72	1	0	1	1	1	0.92645241	0.07354759	0.999333333	0.927025356	0.961822265	0.999894748	0.000105252	1	0.994318182	0.997150997
72	1	0	1	1	1	0.92645241	0.07354759	0.999333333	0.927025356	0.961822265	0.999894748	0.000105252	1	0.994318182	0.997150997
72	1	0	1	1	1	0.92645241	0.07354759	0.999333333	0.927025356	0.961822265	0.999894748	0.000105252	1	0.994318182	0.997150997
72	1	0	1	1	1	0.92645241	0.07354759	0.999333333	0.927025356	0.961822265	0.999894748	0.000105252	1	0.994318182	0.997150997
72	1	0	1	1	1	0.92645241	0.07354759	0.999333333	0.927025356	0.961822265	0.999894748	0.000105252	1	0.994318182	0.997150997
72	1	0	1	1	1	0.92645241	0.07354759	0.999333333	0.927025356	0.961822265	0.999894748	0.000105252	1	0.994318182	0.997150997
72	1	0	1	1	1	0.92645241	0.07354759	0.999333333	0.927025356	0.961822265	0.999894748	0.000105252	1	0.994318182	0.997150997
72	1	0	1	1	1	0.92645241	0.07354759	0.999333333	0.927025356	0.961822265	0.999894748	0.000105252	1	0.994318182	0.997150997
72	1	0	1	1	1	0.92645241	0.07354759	0.999333333	0.927025356	0.961822265	0.999894748	0.000105252	1	0.994318182	0.997150997
72	1	0	1	1	1	0.92645241	0.07354759	0.999333333	0.927025356	0.961822265	0.999894748	0.000105252	1	0.994318182	0.997150997
72	1	0	1	1	1	0.92645241	0.07354759	0.999333333	0.927025356	0.961822265	0.999894748	0.000105252	1	0.994318182	0.997150997
72	1	0	1	1	1	0.92645241	0.07354759	0.999333333	0.927025356	0.961822265	0.999894748	0.000105252	1	0.994318182	0.997150997
72	1	0	1	1	1	0.92645241	0.07354759	0.999333333	0.927025356	0.961822265	0.999894748	0.000105252	1	0.994318182	0.997150997
72	1	0	1	1	1	0.92645241	0.07354759	0.999333333	0.927025356	0.961822265	0.999894748	0.000105252	1	0.994318182	0.997150997
72	1	0	1	1	1	0.92645241	0.07354759	0.999333333	0.927025356	0.961822265	0.999894748	0.000105252	1	0.994318182	0.997150997
72	1	0	1	1	1	0.92645241	0.07354759	0.999333333	0.927025356	0.961822265	0.999894748	0.000105252	1	0.994318182	0.997150997
72	1	0	1	1	1	0.92645241	0.07354759	0.999333333	0.927025356	0.961822265	0.999894748	0.000105252	1	0.994318182	0.997150997
72	1	0	1	1	1	0.92645241	0.07354759	0.999333333	0.927025356	0.961822265	0.999894748	0.000105252	1	0.994318182	0.997150997
72	1	0	1	1	1	0.92645241	0.07354759	0.999333333	0.927025356	0.961822265	0.999894748	0.000105252	1	0.994318182	0.997150997
72	1	0	1	1	1	0.92645241	0.07354759	0.999333333	0.927025356	0.961822265	0.999894748	0.000105252	1	0.994318182	0.997150997
72	1	0	1	1	1	0.92645241	0.07354759	0.999333333	0.927025356	0.961822265	0.999894748	0.000105252	1	0.994318182	0.997150997
72	1	0	1	1	1	0.92645241	0.07354759	0.999333333	0.927025356	0.961822265	0.999894748	0.000105252	1	0.994318182	0.997150997
72	1	0	1	1	1	0.92645241	0.07354759	0.999333333	0.927025356	0.961822265	0.999894748	0.000105252	1	0.994318182	0.997150997
72	1	0	1	1	1	0.92645241	0.07354759	0.999333333	0.927025356	0.961822265	0.999894748	0.000105252	1	0.994318182	0.997150997
72	1	0	1	1	1	0.92645241	0.07354759	0.999333333	0.927025356	0.961822265	0.999894748	0.000105252	1	0.994318182	0.997150997
72	1	0	1	1	1	0.92645241	0.07354759	0.999333333	0.927025356	0.961822265	0.999894748	0.000105252	1	0.994318182	0.997150997
72	1	0	1	1	1	0.92645241	0.07354759	0.999333333	0.927025356	0.961822265	0.999894748	0.000105252	1	0.994318182	0.997150997
72	1	0	1	1	1	0.92645241	0.07354759	0.999333333	0.927025356	0.961822265	0.999894748	0.000105252	1	0.994318182	0.997150997
72	1	0	1	1	1	0.92645241	0.07354759	0.999333333	0.927025356	0.961822265	0.999894748	0.000105252	1	0.994318182	0.997150997
72	1	0	1	1	1	0.92645241	0.07354759	0.999333333	0.927025356	0.961822265	0.999894748	0.000105252	1	0.994318182	0.997150997
72	1	0	1	1	1	0.92645241	0.07354759	0.999333333	0.927025356	0.961822265	0.999894748	0.000105252	1	0.994318182	0.997150997
72	1	0	1	1	1	0.92645241	0.07354759	0.999333333	0.927025356	0.961822265	0.999894748	0.000105252	1	0.994318182	0.997150997
72	1	0	1	1	1	0.92645241	0.07354759	0.999333333	0.927025356	0.961822265	0.999894748	0.000105252	1	0.994318182	0.997150997
72	1	0	1	1	1	0.92645241	0.07354759	0.999333333	0.927025356	0.961822265	0.999894748	0.000105252	1	0.994318182	0.997150997
72	1	0	1	1	1	0.92645241	0.07354759	0.999333333	0.927025356	0.961822265	0.999894748	0.000105252	1	0.994318182	0.997150997
72	1	0	1	1	1	0.92645241	0.07354759	0.999333333	0.927025356	0.961822265	0.999894748	0.000105252	1	0.994318182	0.997150997
72	1	0	1	1	1	0.92645241	0.07354759	0.999333333	0.927025356	0.961822265	0.999894748	0.000105252	1	0.994318182	0.997150997
72	1	0	1	1	1	0.92645241	0.07354759	0.999333333	0.927025356	0.961822265	0.999894748	0.000105252	1	0.994318182	0.997150997
72	1	0	1	1	1	0.92645241	0.07354759	0.999333333	0.927025356	0.961822265	0.999894748	0.000105252	1	0.994318182	0.997150997
72	1	0	1	1	1	0.92645241	0.07354759	0.999333333	0.927025356	0.961822265	0.999894748	0.000105252	1	0.994318182	0.997150997
72	1	0	1	1	1	0.92645241	0.07354759	0.999333333	0.927025356	0.961822265	0.999894748	0.000105252	1	0.994318182	0.997150997
72	1	0	1	1	1	0.92645241	0.07354759	0.999333333	0.927025356	0.961822265	0.999894748	0.000105252	1	0.994318182	0.997150997
72	1	0	1	1	1	0.92645241	0.07354759	0.999333333	0.927025356	0.961822265	0.999894748	0.000105252	1	0.994318182	0.997150997
72	1	0	1	1	1	0.92645241	0.07354759	0.999333333	0.927025356	0.961822265	0.999894748	0.000105252	1	0.994318182	0.997150997
72	1	0	1	1	1	0.92645241	0.07354759	0.999333333	0.927025356	0.961822265	0.999894748	0.000105252	1	0.994318182	0.997150997
72	1	0	1	1	1	0.92645241	0.07354759	0.999333333	0.927025356	0.961822265	0.999894748	0.000105252	1	0.994318182	0.997150997
72	1	0	1	1	1	0.92645241	0.07354759	0.999333333	0.927025356	0.961822265	0.999894748	0.000105252	1	0.994318182	0.997150997
72	1	0	1	1	1	0.92645241	0.07354759	0.999333333	0.927025356	0.961822265	0.999894748	0.000105252	1	0.994318182	0.997150997
72	1	0	1	1	1	0.92645241	0.07354759	0.999333333	0.927025356	0.961822265	0.999894748	0.000105252	1	0.994318182	0.997150997
72	1	0	1	1	1	0.92645241	0.07354759	0.999333333	0.927025356	0.961822265	0.999894748	0.000105252	1	0.994318182	0.997150997
72	1	0	1	1	1	0.92645241	0.07354759	0.999333333	0.927025356	0.961822265	0.999894748	0.000105252	1	0.994318182	0.997150997
72	1	0	1	1	1	0.92645241	0.07354759	0.999333333	0.927025356	0.961822265	0.999894748	0.000105252	1	0.994318182	0.997150997
72	1	0	1	1	1	0.92645241	0.07354759	0.999333333	0.927025356	0.961822265	0.999894748	0.000105252	1	0.994318182	0.997150997
72	1	0	1	1	1	0.92645241	0.07354759	0.999333333	0.927025356	0.961822265	0.999894748	0.000105252	1	0.994318182	0.997150997
72	1	0	1	1	1	0.92645241	0.07354759	0.999333333	0.927025356	0.961822265	0.999894748	0.000105252	1	0.994318182	0.997150997
72	1	0	1	1	1	0.92645241	0.07354759	0.999333333	0.927025356	0.961822265	0.999894748	0.000105252	1	0.994318182	0.997150997
72	1	0	1	1	1	0.92645241	0.07354759	0.999333333	0.927025356	0.961822265	0.999894748	0.000105252	1	0.994318182	0.997150997
72	1	0	1	1	1	0.92645241	0.07354759	0.999333333	0.927025356	0.961822265	0.999894748	0.000105252	1	0.994318182	0.997150997
72	1	0	1	1	1	0.92645241	0.07354759	0.999333333	0.927025356	0.961822265	0.999894748	0.000105252	1	0.994318182	0.997150997
72	1	0	1	1	1	0.92645241	0.07354759	0.999333333	0.927025356	0.961822265	0.999894748	0.000105252	1	0.994318182	0.997150997
72	1	0	1	1	1	0.92645241	0.07354759	0.999333333	0.927025356	0.961822265	0.999894748	0.000105252	1	0.994318182	0.997150997
72	1	0	1	1	1	0.92645241	0.07354759	0.999333333	0.927025356	0.961822265	0.999894748	0.000105252	1	0.994318182	0.997150997
72	1	0	1	1	1	0.92645241	0.07354759	0.999333333	0.927025356	0.961822265	0.999894748	0.000105252	1	0.994318182	0.997150997
72	1	0	1	1	1	0.92645241	0.07354759	0.999333333	0.927025356	0.961822265	0.999894748	0.000105252	1	0.994318182	0.997150997
72	1	0	1	1	1	0.92645241	0.07354759	0.999333333	0.927025356	0.961822265	0.999894748	0.000105252	1	0.994318182	0.997150997
72	1	0	1	1	1	0.92645241	0.07354759	0.999333333	0.927025356	0.961822265	0.999894748	0.000105252	1	0.994318182	0.997150997
72	1	0	1	1	1	0.92645241	0.07354759	0.999333333	0.927025356	0.961822265	0.999894748	0.000105252	1	0.994318182	0.997150997
72	1	0	1	1	1	0.92645241	0.07354759	0.999333333	0.927025356	0.961822265	0.999894748	0.000105252	1	0.994318182	0.997150997
72	1	0	1	1	1	0.92645241	0.07354759	0.999333333	0.927025356	0.961822265	0.999894748	0.000105252	1	0.994318182	0.997150997
72	1	0	1	1	1	0.92645241	0.07354759	0.999333333	0.927025356	0.961822265	0.999894748	0.000105252	1	0.994318182	0.997150997
72	1	0	1	1	1	0.92645241	0.07354759	0.999333333	0.927025356	0.961822265	0.999894748	0.000105252	1	0.994318182	0.997150997
72	1	0	1	1	1	0.92645241	0.07354759	0.999333333	0.927025356	0.961822265	0.999894748	0.000105252	1	0.994318182	0.997150997
72	1	0	1	1	1	0.92645241	0.07354759	0.999333333	0.927025356	0.961822265	0.999894748	0.000105252	1	0.994318182	0.997150997
72	1	0	1	1	1	0.92645241	0.07354759	0.999333333	0.927025356	0.961822265	0.999894748	0.000105252	1	0.994318182	0.997150997
72	1	0	1	1	1	0.92645241	0.07354759	0.999333333	0.927025356	0.961822265	0.999894748	0.000105252	1	0.994318182	0.997150997
72	1	0	1	1	1	0.92645241	0.07354759	0.999333333	0.927025356	0.961822265	0.999894748	0.000105252	1	0.994318182	0.997150997
72	1	0	1	1	1	0.92645241	0.07354759	0.999333333	0.927025356	0.961822265	0.999894748	0.000105252	1	0.994318182	0.997150997
72	1	0	1	1	1	0.92645241	0.07354759	0.999333333	0.927025356	0.961822265	0.999894748	0.000105252	1	0.994318182	0.997150997
72	1	0	1	1	1	0.92645241	0.07354759	0.999333333	0.927025356	0.961822265	0.999894748	0.000105252	1	0.994318182	0.997150997
72	1	0	1	1	1	0.92645241	0.07354759	0.999333333	0.927025356	0.961822265	0.999894748	0.000105252	1	0.994318182	0.997150997
72	1	0	1	1	1	0.92645241	0.07354759	0.999333333	0.927025356	0.961822265	0.999894748	0.000105252	1	0.994318182	0.997150997
72	1	0	1	1	1	0.92645241	0.07354759	0.999333333	0.927025356	0.961822265	0.999894748	0.000105252	1	0.994318182	0.997150997
72	1	0	1	1	1	0.92645241	0.07354759	0.999333333	0.927025356	0.961822265	0.999894748	0.000105252	1	0.994318182	0.997150997
72	1	0	1	1	1	0.92645241	0.07354759	0.999333333	0.927025356	0.961822265	0.999894748	0.000105252	1	0.994318182	0.997150997
72	1	0	1	1	1	0.92645241	0.07354759	0.999333333	0.927025356	0.961822265	0.999894748	0.000105252	1	0.994318182	0.997150997
72	1	0	1	1	1	0.92645241	0.07354759	0.999333333	0.927025356	0.961822265	0.999894748	0.000105252	1	0.994318182	0.997150997
72	1	0	1	1	1	0.92645241	0.07354759	0.999333333	0.927025356	0.961822265	0.999894748	0.000105252	1	0.994318182	0.997150997
72	1	0	1	1	1	0.92645241	0.07354759	0.999333333	0.927025356	0.961822265	0.999894748	0.000105252	1	0.994318182	0.997150997
72	1	0	1	1	1	0.92645241	0.07354759	0.999333333	0.927025356	0.961822265	0.999894748	0.000105252	1	0.994318182	0.997150997
72	1	0	1	1	1	0.92645241	0.07354759	0.999333333	0.927025356	0.961822265	0.999894748	0.000105252	1	0.994318182	0.997150997
72	1	0	1	1	1	0.92645241	0.07354759	0.999333333	0.927025356	0.961822265	0.999894748	0.000105252	1	0.994318182	0.997150997
72	1	0	1	1	1	0.92645241	0.07354759	0.999333333	0.927025356	0.961822265	0.999894748	0.000105252	1	0.994318182	0.997150997
72	1	0	1	1	1	0.92645241	0.07354759	0.999333333	0.927025356	0.961822265	0.999894748	0.000105252	1	0.994318182	0.997150997
72	1	0	1	1	1	0.92645241	0.07354759	0.999333333	0.927025356	0.961822265	0.999894748	0.000105252	1	0.994318182	0.997150997
72	1	0	1	1	1	0.92645241	0.07354759	0.999333333	0.927025356	0.961822265	0.999894748	0.000105252	1	0.994318182	0.997150997
72	1	0	1	1	1	0.92645241	0.07354759	0.999333333	0.927025356	0.961822265	0.999894748	0.000105252	1	0.994318182	0.997150997
72	1	0	1	1	1	0.92645241	0.07354759	0.999333333	0.927025356	0.961822265	0.999894748	0.000105252	1	0.994318182	0.997150997
72	1	0	1	1	1	0.92645241	0.07354759	0.999333333	0.927025356	0.961822265	0.999894748	0.000105252	1	0.994318182	0.997150997
72	1	0	1	1	1	0.92645241	0.07354759	0.999333333	0.927025356	0.961822265	0.999894748	0.000105252	1	0.994318182	0.997150997
72	1	0	1	1	1	0.92645241	0.07354759	0.999333333	0.927025356	0.961822265	0.999894748	0.000105252	1	0.994318182	0.997150997
72	1	0	1	1	1	0.92645241	0.07354759	0.999333333	0.927025356	0.961822265	0.999894748	0.000105252	1	0.994318182	0.997150997
72	1	0	1	1	1	0.92645241	0.07354759	0.999333333	0.927025356	0.961822265	0.999894748	0.000105252	1	0.994318182	0.997150997
72	1	0	1	1	1	0.92645241	0.07354759	0.999333333	0.927025356	0.961822265	0.999894748	0.000105252	1	0.994318182	0.997150997
72	1	0	1	1	1	0.92645241	0.07354759	0.999333333	0.927025356	0.961822265	0.999894748	0.000105252	1	0.994318182	0.997150997
72	1	0	1	1	1	0.92645241	0.07354759	0.999333333	0.927025356	0.961822265	0.999894748	0.000105252	1	0.994318182	0.997150997
72	1	0	1	1	1	0.92645241	0.07354759	0.999333333	0.927025356	0.961822265	0.999894748	0.000105252	1	0.994318182	0.997150997
72	1	0	1	1	1	0.92645241	0.07354759	0.999333333	0.927025356	0.961822265	0.999894748	0.000105252	1	0.994318182	0.997150997
72	1	0	1	1	1	0.92645241	0.07354759	0.999333333	0.927025356	0.961822265	0.999894748	0.000105252	1	0.994318182	0.997150997
72	1	0	1	1	1	0.92645241	0.07354759	0.999333333	0.927025356	0.961822265	0.999894748	0.000105252	1	0.994318182	0.997150997
72	1	0	1	1	1	0.92645241	0.07354759	0.999333333	0.927025356	0.961822265	0.999894748	0.000105252	1	0.994318182	0.997150997
72	1	0	1	1	1	0.92645241	0.07354759	0.999333333	0.927025356	0.961822265	0.999894748	0.000105252	1	0.994318182	0.997150997
72	1	0	1	1	1	0.92645241	0.07354759	0.999333333	0.927025356	0.961822265	0.999894748	0.000105252	1	0.994318182	0.997150997
72	1	0	1	1	1	0.92645241	0.07354759	0.999333333	0.927025356	0.961822265	0.999894748	0.000105252	1	0.994318182	0.997150997
72	1	0	1	1	1	0.92645241	0.07354759	0.999333333	0.927025356	0.961822265	0.999894748	0.000105252	1	0.994318182	0.997150997
72	1	0	1	1	1	0.92645241	0.07354759	0.999333333	0.927025356	0.961822265	0.999894748	0.000105252	1	0.994318182	0.997150997
72	1	0	1	1	1	0.92645241	0.07354759	0.999333333	0.927025356	0.961822265	0.999894748	0.000105252	1	0.994318182	0.997150997
72	1	0	1	1	1	0.92645241	0.07354759	0.999333333	0.927025356	0.961822265	0.999894748	0.000105252	1	0.994318182	0.997150997
72	1	0	1	1	1	0.92645241	0.07354759	0.999333333	0.927025356	0.961822265	0.999894748	0.000105252	1	0.994318182	0.997150997
72	1	0	1	1	1	0.92645241	0.07354759	0.999333333	0.927025356	0.961822265	0.999894748	0.000105252	1	0.994318182	0.997150997
72	1	0	1	1	1	0.92645241	0.07354759	0.999333333	0.927025356	0.961822265	0.999894748	0.000105252	1	0.994318182	0.997150997
72	1	0	1	1	1	0.92645241	0.07354759	0.999333333	0.927025356	0.961822265	0.999894748	0.000105252	1	0.994318182	0.997150997
72	1	0	1	1	1	0.92645241	0.07354759	0.999333333	0.927025356	0.961822265	0.999894748	0.000105252	1	0.994318182	0.997150997
72	1	0	1	1	1	0.92645241	0.07354759	0.999333333	0.927025356	0.961822265	0.999894748	0.000105252	1	0.994318182	0.997150997
72	1	0	1	1	1	0.92645241	0.07354759	0.999333333	0.927025356	0.961822265	0.999894748	0.000105252	1	0.994318182	0.997150997
72	1	0	1	1	1	0.92645241	0.07354759	0.999333333	0.927025356	0.961822265	0.999894748	0.000105252	1	0.994318182	0.997150997
72	1	0	1	1	1	0.92645241	0.07354759	0.999333333	0.927025356	0.961822265	0.999894748	0.000105252	1	0.994318182	0.997150997
72	1	0	1	1	1	0.92645241	0.07354759	0.999333333	0.927025356	0.961822265	0.999894748	0.000105252	1	0.994318182	0.997150997
72	1	0	1	1	1	0.92645241	0.07354759	0.999333333	0.927025356	0.961822265	0.999894748	0.000105252	1	0.994318182	0.997150997
72	1	0	1	1	1	0.92645241	0.07354759	0.999333333	0.927025356	0.961822265	0.999894748	0.000105252	1	0.994318182	0.997150997
72	1	0	1	1	1	0.92645241	0.07354759	0.999333333	0.927025356	0.961822265	0.999894748	0.000105252	1	0.994318182	0.997150997
72	1	0	1	1	1	0.92645241	0.07354759	0.999333333	0.927025356	0.961822265	0.999894748	0.000105252	1	0.994318182	0.997150997
72	1	0	1	1	1	0.92645241	0.07354759	0.999333333	0.927025356	0.961822265	0.999894748	0.000105252	1	0.994318182	0.997150997
72	1	0	1	1	1	0.92645241	0.07354759	0.999333333	0.927025356	0.961822265	0.999894748	0.000105252	1	0.994318182	0.997150997
72	1	0	1	1	1	0.92645241	0.07354759	0.999333333	0.927025356	0.961822265	0.999894748	0.000105252	1	0.994318182	0.997150997
72	1	0	1	1	1	0.92645241	0.07354759	0.999333333	0.927025356	0.961822265	0.999894748	0.000105252	1	0.994318182	0.997150997
72	1	0	1	1	1	0.92645241	0.07354759	0.999333333	0.927025356	0.961822265	0.999894748	0.000105252	1	0.994318182	0.997150997
72	1	0	1	1	1	0.92645241	0.07354759	0.999333333	0.927025356	0.961822265	0.999894748	0.000105252	1	0.994318182	0.997150997
72	1	0	1	1	1	0.92645241	0.07354759	0.999333333	0.927025356	0.961822265	0.999894748	0.000105252	1	0.994318182	0.997150997
72	1	0	1	1	1	0.92645241	0.07354759	0.999333333	0.927025356	0.961822265	0.999894748	0.000105252	1	0.994318182	0.997150997
72	1	0	1	1	1	0.92645241	0.07354759	0.999333333	0.927025356	0.961822265	0.999894748	0.000105252	1	0.994318182	0.997150997
72	1	0	1	1	1	0.92645241	0.07354759	0.999333333	0.927025356	0.961822265	0.999894748	0.000105252	1	0.994318182	0.997150997
72	1	0	1	1	1	0.92645241	0.07354759	0.999333333	0.927025356	0.961822265	0.999894748	0.000105252	1	0.994318182	0.997150997
72	1	0	1	1	1	0.92645241	0.07354759	0.999333333	0.927025356	0.961822265	0.999894748	0.000105252	1	0.994318182	0.997150997
72	1	0	1	1	1	0.92645241	0.07354759	0.999333333	0.927025356	0.961822265	0.999894748	0.000105252	1	0.994318182	0.997150997
72	1	0	1	1	1	0.92645241	0.07354759	0.999333333	0.927025356	0.961822265	0.999894748	0.000105252	1	0.994318182	0.997150997
72	1	0	1	1	1	0.92645241	0.07354759	0.999333333	0.927025356	0.961822265	0.999894748	0.000105252	1	0.994318182	0.997150997
72	1	0	1	1	1	0.92645241	0.07354759	0.999333333	0.927025356	0.961822265	0.999894748	0.000105252	1	0.994318182	0.997150997
72	1	0	1	1	1	0.92645241	0.07354759	0.999333333	0.927025356	0.961822265	0.999894748	0.000105252	1	0.994318182	0.997150997
72	1	0	1	1	1	0.92645241	0.07354759	0.999333333	0.927025356	0.961822265	0.999894748	0.000105252	1	0.994318182	0.997150997
72	1	0	1	1	1	0.92645241	0.07354759	0.999333333	0.927025356	0.961822265	0.999894748	0.000105252	1	0.994318182	0.997150997
72	1	0	1	1	1	0.92645241	0.07354759	0.999333333	0.927025356	0.961822265	0.999894748	0.000105252	1	0.994318182	0.997150997
72	1	0	1	1	1	0.92645241	0.07354759	0.999333333	0.927025356	0.961822265	0.999894748	0.000105252	1	0.994318182	0.997150997
72	1	0	1	1	1	0.92645241	0.07354759	0.999333333	0.927025356	0.961822265	0.999894748	0.000105252	1	0.994318182	0.997150997
72	1	0	1	1	1	0.92645241	0.07354759	0.999333333	0.927025356	0.961822265	0.999894748	0.000105252	1	0.994318182	0.997150997
72	1	0	1	1	1	0.92645241	0.07354759	0.999333333	0.927025356	0.961822265	0.999894748	0.000105252	1	0.994318182	0.997150997
72	1	0	1	1	1	0.92645241	0.07354759	0.999333333	0.927025356	0.961822265	0.999894748	0.000105252	1	0.994318182	0.997150997
72	1	0	1	1	1	0.92645241	0.07354759	0.999333333	0.927025356	0.961822265	0.999894748	0.000105252	1	0.994318182	0.997150997
72	1	0	1	1	1	0.92645241	0.07354759	0.999333333	0.927025356	0.961822265	0.999894748	0.000105252	1	0.994318182	0.997150997
72	1	0	1	1	1	0.92645241	0.07354759	0.999333333	0.927025356	0.961822265	0.999894748	0.000105252	1	0.994318182	0.997150997
72	1	0	1	1	1	0.92645241	0.07354759	0.999333333	0.927025356	0.961822265	0.999894748	0.000105252	1	0.994318182	0.997150997
72	1	0	1	1	1	0.92645241	0.07354759	0.999333333	0.927025356	0.961822265	0.999894748	0.000105252	1	0.994318182	0.997150997
72	1	0	1	1	1	0.92645241	0.07354759	0.999333333	0.927025356	0.961822265	0.999894748	0.000105252	1	0.994318182	0.997150997
72	1	0	1	1	1	0.92645241	0.07354759	0.999333333	0.927025356	0.961822265	0.999894748	0.000105252	1	0.994318182	0.997150997
72	1	0	1	1	1	0.92645241	0.07354759	0.999333333	0.927025356	0.961822265	0.999894748	0.000105252	1	0.994318182	0.997150997
72	1	0	1	1	1	0.92645241	0.07354759	0.999333333	0.927025356	0.961822265	0.999894748	0.000105252	1	0.994318182	0.997150997
72	1	0	1	1	1	0.92645241	0.07354759	0.999333333	0.927025356	0.961822265	0.999894748	0.000105252	1	0.994318182	0.997150997
72	1	0	1	1	1	0.92645241	0.07354759	0.999333333	0.927025356	0.961822265	0.999894748	0.000105252	1	0.994318182	0.997150997
72	1	0	1	1	1	0.92645241	0.07354759	0.999333333	0.927025356	0.961822265	0.999894748	0.000105252	1	0.994318182	0.997150997
72	1	0	1	1	1	0.92645241	0.07354759	0.999333333	0.927025356	0.961822265	0.999894748	0.000105252	1	0.994318182	0.997150997
72	1	0	1	1	1	0.92645241	0.07354759	0.999333333	0.927025356	0.961822265	0.999894748	0.000105252	1	0.994318182	0.997150997
72	1	0	1	1	1	0.92645241	0.07354759	0.999333333	0.927025356	0.961822265	0.999894748	0.000105252	1	0.994318182	0.997150997
72	1	0	1	1	1	0.92645241	0.07354759	0.999333333	0.927025356	0.961822265	0.999894748	0.000105252	1	0.994318182	0.997150997
72	1	0	1	1	1	0.92645241	0.07354759	0.999333333	0.927025356	0.961822265	0.999894748	0.000105252	1	0.994318182	0.997150997
72	1	0	1	1	1	0.92645241	0.07354759	0.999333333	0.927025356	0.961822265	0.999894748	0.000105252	1	0.994318182	0.997150997
72	1	0	1	1	1	0.92645241	0.07354759	0.999333333	0.927025356	0.961822265	0.999894748	0.000105252	1	0.994318182	0.997150997
72	1	0	1	1	1	0.92645241	0.07354759	0.999333333	0.927025356	0.961822265	0.999894748	0.000105252	1	0.994318182	0.997150997
72	1	0	1	1	1	0.92645241	0.07354759	0.999333333	0.927025356	0.961822265	0.999894748	0.000105252	1	0.994318182	0.997150997
72	1	0	1	1	1	0.92645241	0.07354759	0.999333333	0.927025356	0.961822265	0.999894748	0.000105252	1	0.994318182	0.997150997
72	1	0	1	1	1	0.92645241	0.07354759	0.999333333	0.927025356	0.961822265	0.999894748	0.000105252	1	0.994318182	0.997150997
72	1	0	1	1	1	0.92645241	0.07354759	0.999333333	0.927025356	0.961822265	0.999894748	0.000105252	1	0.994318182	0.997150997
72	1	0	1	1	1	0.92645241	0.07354759	0.999333333	0.927025356	0.961822265	0.999894748	0.000105252	1	0.994318182	0.997150997
72	1	0	1	1	1	0.92645241	0.07354759	0.999333333	0.927025356	0.961822265	0.999894748	0.000105252	1	0.994318182	0.997150997
72	1	0	1	1	1	0.92645241	0.07354759	0.999333333	0.927025356	0.961822265	0.999894748	0.000105252	1	0.994318182	0.997150997
72	1	0	1	1	1	0.92645241	0.07354759	0.999333333	0.927025356	0.961822265	0.999894748	0.000105252	1	0.994318182	0.997150997
72	1	0	1	1	1	0.92645241	0.07354759	0.999333333	0.927025356	0.961822265	0.999894748	0.000105252	1	0.994318182	0.997150997
72	1	0	1	1	1	0.92645241	0.07354759	0.999333333	0.927025356	0.961822265	0.999894748	0.000105252	1	0.994318182	0.997150997
72	1	0	1	1	1	0.92645241	0.07354759	0.999333333	0.927025356	0.961822265	0.999894748	0.000105252	1	0.994318182	0.997150997
72	1	0	1	1	1	0.92645241	0.07354759	0.999333333	0.927025356	0.961822265	0.999894748	0.000105252	1	0.994318182	0.997150997
72	1	0	1	1	1	0.92645241	0.07354759	0.999333333	0.927025356	0.961822265	0.999894748	0.000105252	1	0.994318182	0.997150997
72	1	0	1	1	1	0.92645241	0.07354759	0.999333333	0.927025356	0.961822265	0.999894748	0.000105252	1	0.994318182	0.997150997
72	1	0	1	1	1	0.92645241	0.07354759	0.999333333	0.927025356	0.961822265	0.999894748	0.000105252	1	0.994318182	0.997150997
72	1	0	1	1	1	0.92645241	0.07354759	0.999333333	0.927025356	0.961822265	0.999894748	0.000105252	1	0.994318182	0.997150997
72	1	0	1	1	1	0.92645241	0.07354759	0.999333333	0.927025356	0.961822265	0.999894748	0.000105252	1	0.994318182	0.997150997
72	1	0	1	1	1	0.92645241	0.07354759	0.999333333	0.927025356	0.961822265	0.999894748	0.000105252	1	0.994318182	0.997150997
72	1	0	1	1	1	0.92645241	0.07354759	0.999333333	0.927025356	0.961822265	0.999894748	0.000105252	1	0.994318182	0.997150997
72	1	0	1	1	1	0.92645241	0.07354759	0.999333333	0.927025356	0.961822265	0.999894748	0.000105252	1	0.994318182	0.997150997
72	1	0	1	1	1	0.92645241	0.07354759	0.999333333	0.927025356	0.961822265	0.999894748	0.000105252	1	0.994318182	0.997150997
72	1	0	1	1	1	0.92645241	0.07354759	0.999333333	0.927025356	0.961822265	0.999894748	0.000105252	1	0.994318182	0.997150997
72	1	0	1	1	1	0.92645241	0.07354759	0.999333333	0.927025356	0.961822265	0.999894748	0.000105252	1	0.994318182	0.997150997
72	1	0	1	1	1	0.92645241	0.07354759	0.999333333	0.927025356	0.961822265	0.999894748	0.000105252	1	0.994318182	0.997150997
72	1	0	1	1	1	0.92645241	0.07354759	0.999333333	0.927025356	0.961822265	0.999894748	0.000105252	1	0.994318182	0.997150997
72	1	0	1	1	1	0.92645241	0.07354759	0.999333333	0.927025356	0.961822265	0.999894748	0.000105252	1	0.994318182	0.997150997
72	1	0	1	1	1	0.92645241	0.07354759	0.999333333	0.927025356	0.961822265	0.999894748	0.000105252	1	0.994318182	0.997150997
72	1	0	1	1	1	0.92645241	0.07354759	0.999333333	0.927025356	0.961822265	0.999894748	0.000105252	1	0.994318182	0.997150997
72	1	0	1	1	1	0.92645241	0.07354759	0.999333333	0.927025356	0.961822265	0.999894748	0.000105252	1	0.994318182	0.997150997
72	1	0	1	1	1	0.92645241	0.07354759	0.999333333	0.927025356	0.961822265	0.999894748	0.000105252	1	0.994318182	0.997150997
72	1	0	1	1	1	0.92645241	0.07354759	0.999333333	0.927025356	0.961822265	0.999894748	0.000105252	1	0.994318182	0.997150997
72	1	0	1	1	1	0.92645241	0.07354759	0.999333333	0.927025356	0.961822265	0.999894748	0.000105252	1	0.994318182	0.997150997
72	1	0	1	1	1	0.92645241	0.07354759	0.999333333	0.927025356	0.961822265	0.999894748	0.000105252	1	0.994318182	0.997150997
72	1	0	1	1	1	0.92645241	0.07354759	0.999333333	0.927025356	0.961822265	0.999894748	0.000105252	1	0.994318182	0.997150997
72	1	0	1	1	1	0.92645241	0.07354759	0.999333333	0.927025356	0.961822265	0.999894748	0.000105252	1	0.994318182	0.997150997
72	1	0	1	1	1	0.92645241	0.07354759	0.999333333	0.927025356	0.961822265	0.999894748	0.000105252	1	0.994318182	0.997150997
72	1	0	1	1	1	0.92645241	0.07354759	0.999333333	0.927025356	0.961822265	0.999894748	0.000105252	1	0.994318182	0.997150997
72	1	0	1	1	1	0.92645241	0.07354759	0.999333333	0.927025356	0.961822265	0.999894748	0.000105252	1	0.994318182	0.997150997
72	1	0	1	1	1	0.92645241	0.07354759	0.999333333	0.927025356	0.961822265	0.999894748	0.000105252	1	0.994318182	0.997150997
72	1	0	1	1	1	0.92645241	0.07354759	0.999333333	0.927025356	0.961822265	0.999894748	0.000105252	1	0.994318182	0.997150997
72	1	0	1	1	1	0.92645241	0.07354759	0.999333333	0.927025356	0.961822265	0.999894748	0.000105252	1	0.994318182	0.997150997
72	1	0	1	1	1	0.92645241	0.07354759	0.999333333	0.927025356	0.961822265	0.999894748	0.000105252	1	0.994318182	0.997150997
72	1	0	1	1	1	0.92645241	0.07354759	0.999333333	0.927025356	0.961822265	0.999894748	0.000105252	1	0.994318182	0.997150997
72	1	0	1	1	1	0.92645241	0.07354759	0.999333333	0.927025356	0.961822265	0.999894748	0.000105252	1	0.994318182	0.997150997
72	1	0	1	1	1	0.92645241	0.07354759	0.999333333	0.927025356	0.961822265	0.999894748	0.000105252	1	0.994318182	0.997150997
72	1	0	1	1	1	0.92645241	0.07354759	0.999333333	0.927025356	0.961822265	0.999894748	0.000105252	1	0.994318182	0.997150997
72	1	0	1	1	1	0.92645241	0.07354759	0.999333333	0.927025356	0.961822265	0.999894748	0.000105252	1	0.994318182	0.997150997
72	1	0	1	1	1	0.92645241	0.07354759	0.999333333	0.927025356	0.961822265	0.999894748	0.000105252	1	0.994318182	0.997150997
72	1	0	1	1	1	0.92645241	0.07354759	0.999333333	0.927025356	0.961822265	0.999894748	0.000105252	1	0.994318182	0.997150997
72	1	0	1	1	1	0.92645241	0.07354759	0.999333333	0.927025356	0.961822265	0.999894748	0.000105252	1	0.994318182	0.997150997
72	1	0	1	1	1	0.92645241	0.07354759	0.999333333	0.927025356	0.961822265	0.999894748	0.000105252	1	0.994318182	0.997150997
72	1	0	1	1	1	0.92645241	0.07354759	0.999333333	0.927025356	0.961822265	0.999894748	0.000105252	1	0.994318182	0.997150997
72	1	0	1	1	1	0.92645241	0.07354759	0.999333333	0.927025356	0.961822265	0.999894748	0.000105252	1	0.994318182	0.997150997
